# Supplementary material for: Functional partitioning of a liquid-like organelle during assembly of axonemal dyneins
Source: eLife journal article supplement (doi:10.7554/elife.58662), 2020-12-02
Supplement: supp [file elife-58662-supp-v1.zip]

Archive with 9 entries (9 files):
- elife_poa_e58662_Figure_1_figure_supplement_1.pdf
- elife_poa_e58662_Figure_2_figure_supplement_1.pdf
- elife_poa_e58662_Figure_3_figure_supplement_1.pdf
- elife_poa_e58662_Figure_4_figure_supplement_1.pdf
- elife_poa_e58662_Figure_9_figure_supplement_1.pdf
- elife_poa_e58662_Supplementary_file_1.csv
- elife_poa_e58662_Supplementary_file_2.csv
- elife_poa_e58662_Supplementary_file_3.csv
- elife_poa_e58662_Transparent_Reporting_File.docx
