# Supplementary material for: Functional partitioning of a liquid-like organelle during assembly of axonemal dyneins
Source: eLife journal article supplement (doi:10.7554/elife.58662), 2020-12-02
Supplement: supp [file elife-58662-supp-v1.zip › elife_poa_e58662_Figure_1_figure_supplement_1.pdf]

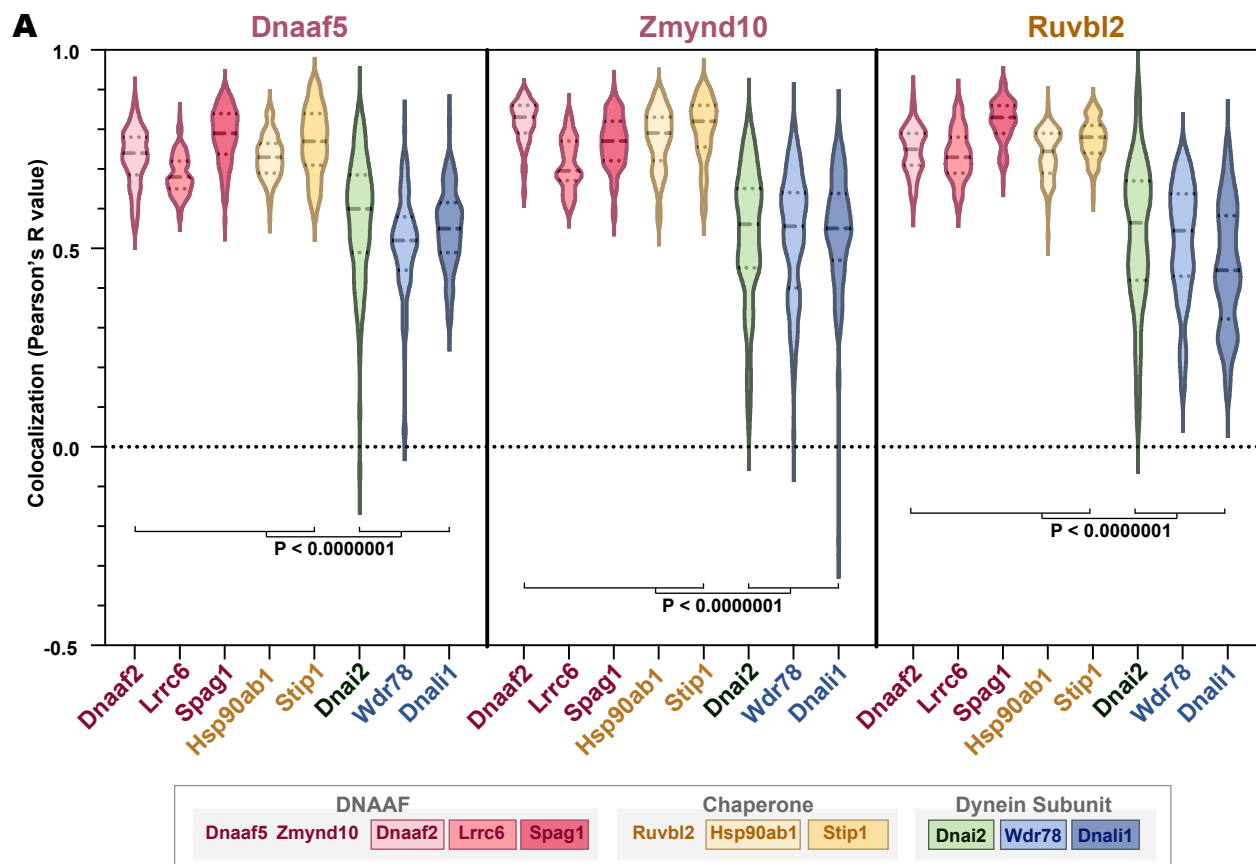

**B**

|                | Dnaaf2                | Lrrc6                 | Spag1                 | Hsp90ab1               | Stip1                 | Dnai2                  | Wdr78                 | Dnali1                 |
|----------------|-----------------------|-----------------------|-----------------------|------------------------|-----------------------|------------------------|-----------------------|------------------------|
| <b>Dnaaf5</b>  | 0.73 ± 0.07<br>(n=93) | 0.69 ± 0.05<br>(n=92) | 0.78 ± 0.07<br>(n=98) | 0.73 ± 0.06<br>(n=89)  | 0.77 ± 0.08<br>(n=95) | 0.57 ± 0.16<br>(n=89)  | 0.51 ± 0.13<br>(n=92) | 0.55 ± 0.10<br>(n=97)  |
| <b>Zmynd10</b> | 0.82 ± 0.05<br>(n=99) | 0.71 ± 0.06<br>(n=72) | 0.77 ± 0.07<br>(n=91) | 0.78 ± 0.08<br>(n=116) | 0.80 ± 0.08<br>(n=89) | 0.54 ± 0.17<br>(n=100) | 0.53 ± 0.16<br>(n=90) | 0.54 ± 0.15<br>(n=100) |
| <b>Ruvbl2</b>  | 0.75 ± 0.06<br>(n=79) | 0.74 ± 0.06<br>(n=91) | 0.82 ± 0.05<br>(n=81) | 0.74 ± 0.06<br>(n=82)  | 0.77 ± 0.05<br>(n=92) | 0.54 ± 0.18<br>(n=92)  | 0.52 ± 0.15<br>(n=80) | 0.45 ± 0.15<br>(n=90)  |
