# Supplementary material for: Functional partitioning of a liquid-like organelle during assembly of axonemal dyneins
Source: eLife journal article supplement (doi:10.7554/elife.58662), 2020-12-02
Supplement: supp [file elife-58662-supp-v1.zip › elife_poa_e58662_Supplementary_file_1.csv]

accession	ctrl_PSMs_b1	ctrl_PSMs_b2	exp_PSMs_b1	exp_PSMs_b2	PSM_zscore_b1	PSM_zscore_b2	PSM_log2fc_b1	PSM_log2fc_b2	mean_ctrl_PSMs	mean_exp_PSMs	joint_zscore	description	xl_id	xl_id_source	xenla_xen_base_gene_names	xenla_gen_bank_description	human_uni_prot_id	human_gene_names_primary	human_gene_names_synonyms	egg_nog_annotation	pval	fdr_bh	conf_90	conf_95	conf_99
ENOG411DGHA	0	0	202	344	14.199547221066297	18.028503658663283	7.641645811140076	8.256575922591404	0	273	22.788673321481863	ENOG411DGHA	148236527, Xelaev18046434m.g	GenBank, Xenbase_9.1	dnai2.S	dynein, axonemal, intermediate chain 2 [Xenopus laevis], NA	NA	DNAI2	DNAI2	Dynein, axonemal, intermediate chain 2	2.9693743004683104e-115	7.221518298738931e-112	TRUE	TRUE	TRUE
ENOG411CW1E	80	147	265	524	9.896579677208342	13.417240254632176	1.6917423265714642	1.6528436178504076	113.5	394.5	16.485360169166523	ENOG411CW1E	122936479, 139635, 139636, 139639, 139640, 155369239, 189441688, 313758, 55391444, 77748400, Xelaev18022892m.g, Xelaev18025047m.g, Xelaev18022891m.g	GenBank, Xenbase_9.1	loc100494633.L, loc100494633.S, loc100485054.L	LOC100037071 protein [Xenopus laevis], RecName: Full=Vitellogenin-A1; Short=VTG A1; Flags: Precursor, RecName: Full=Vitellogenin-A2; Short=VTG A2; Contains: RecName: Full=Lipovitellin I; Contains: RecName: Full=Lipovitellin II; Contains: RecName: Full=Phosvitin; Flags: Precursor, RecName: Full=Vitellogenin-B1; Short=VTG B1; Flags: Precursor, RecName: Full=Vitellogenin-B2; Short=VTG B2; Flags: Pre…	NA	NA	NA	vitellogenin	2.3375025900917326e-61	2.842403149551547e-58	TRUE	TRUE	TRUE
ENOG411CT94	1	0	35	100	5.641303669176448	9.6974947826971	4.146234895397212	6.484334853677667	0.5	67.5	10.846168400573502	ENOG411CT94	21396416, 237511151, Xelaev18012788m.g, Xelaev18030942m.g, Xelaev18044708m.g, Xelaev18046776m.g, Xelaev18047178m.g	GenBank, Xenbase_9.1	loc101730961.L, dnah11.L, dnah11-like.2.L, dnah9.S, dnah11-like.2.S	dynein heavy chain 9 [Xenopus laevis], dynein axonemal heavy chain 11 [Xenopus laevis], NA	Q9NYC9, Q96DT5, Q9UFH2	DNAH9, DNAH11, DNAH17	DNAH17L DNAL1 KIAA0357, NA, DNAHL1 DNEL2	Dynein, axonemal heavy chain	1.0398074595898541e-27	8.429372472408418e-25	TRUE	TRUE	TRUE
ENOG411DGH7	0	0	46	61	6.756895537163874	7.571148045696127	5.530898745632537	5.780319681312747	0	53.5	10.131456778576702	ENOG411DGH7	148222059, Xelaev18008622m.g	GenBank, Xenbase_9.1	dnai1.L	MGC80975 protein [Xenopus laevis], NA	Q9UI46	DNAI1	NA	Dynein, axonemal, intermediate chain 1	2.003177710158045e-24	1.2179320477760915e-21	TRUE	TRUE	TRUE
ENOG411CQ77	9	29	52	80	5.465054569941329	4.360499245769678	2.3823022536307366	1.2590827782019787	19	66	6.94771573200261	ENOG411CQ77	148234619, Xelaev18044865m.g, Xelaev18028448m.g	GenBank, Xenbase_9.1	cps1.L, cad.L	carbamoyl-phosphate synthase 1, mitochondrial [Xenopus laevis], NA	P27708, P31327	CAD, CPS1	NA	Carbamoyl-phosphate synthetase 2, aspartate transcarbamylase, and dihydroorotase	1.8562405181432374e-12	9.028753880248707e-10	TRUE	TRUE	TRUE
ENOG411DGHH	72	107	133	219	4.163198204911854	5.222446178403603	0.8525745255326547	0.8525955822870636	89.5	176	6.636652789247791	ENOG411DGHH	148227386, Xelaev18024169m.g	GenBank, Xenbase_9.1	pc.S	pyruvate carboxylase, gene 1 [Xenopus laevis], NA	P11498	PC	NA	Catalyzes a 2-step reaction, involving the ATP-dependent carboxylation of the covalently attached biotin in the first step and the transfer of the carboxyl group to pyruvate in the second	1.6044315118858057e-11	6.503295728177132e-9	TRUE	TRUE	TRUE
ENOG411CQKW	1	8	16	44	3.617993841436115	4.688538905012229	3.063772735205239	2.148051465813235	4.5	30	5.87360563316174	ENOG411CQKW	Xelaev18032508m.g	Xenbase_9.1	oplah.L	NA	O14841	OPLAH	NA	5-oxoprolinase (ATP-hydrolysing)	2.1320854975070894e-9	7.407474185624631e-7	TRUE	TRUE	TRUE
ENOG411CVHA	0	1	11	22	3.302094575423669	4.214921408964331	3.561272394676056	3.3496853269828852	0.5	16.5	5.315332976848426	ENOG411CVHA	148233082, 2102675, 50417530, Xelaev18039657m.g	GenBank, Xenbase_9.1	wdhd1.L	WD repeat and HMG-box DNA-binding protein 1 [Xenopus laevis], AND-1 protein [Xenopus laevis], Wdhd1 protein [Xenopus laevis], NA	O75717	WDHD1	AND1	WD repeat and HMG-box DNA binding protein 1	5.323123212887972e-8	1.6182294567179434e-5	TRUE	TRUE	TRUE
ENOG411CYUD	12	14	32	48	2.970150261985708	3.9446111631324228	1.3202642951722607	1.533942619432562	13	40	4.889474693988186	ENOG411CYUD	148223539, 148223736	GenBank	NA	coatomer protein complex, subunit beta 1 [Xenopus laevis], uncharacterized protein LOC735158 [Xenopus laevis]	P53618	COPB1	COPB	The coatomer is a cytosolic protein complex that binds to dilysine motifs and reversibly associates with Golgi non- clathrin-coated vesicles, which further mediate biosynthetic protein transport from the ER, via the Golgi up to the trans Golgi network. Coatomer complex is required for budding from Golgi membranes, and is essential for the retrograde Golgi-to-ER transport of dilysine-tagged protei…	5.055270936868193e-7	1.2699406957027896e-4	TRUE	TRUE	TRUE
ENOG411CTA9	14	36	39	80	3.385903148041707	3.5085700029593023	1.3913473932337435	0.9565200081815474	25	59.5	4.875128717781397	ENOG411CTA9	147901189, 148235919, 48734648, Xelaev18032984m.g	GenBank, Xenbase_9.1	slc25a13.S	solute carrier family 25, member 13 (citrin) [Xenopus laevis], solute carrier family 25 (mitochondrial carrier, Aralar), member 12 [Xenopus laevis], LOC443574 protein [Xenopus laevis], NA	O75746, Q9UJS0	SLC25A12, SLC25A13	ARALAR1, ARALAR2	solute carrier family 25 (aspartate glutamate carrier), member	5.436876480349637e-7	1.2699406957027896e-4	TRUE	TRUE	TRUE
ENOG411CTMB	0	0	6	21	2.4385379313895865	4.440579897321633	2.7836648160125037	4.2855549895631695	0	13.5	4.864270865262982	ENOG411CTMB	148223217, Xelaev18044872m.g	GenBank, Xenbase_9.1	nme9.L	thioredoxin domain containing 6 [Xenopus laevis], NA	Q8N427	NME8	SPTRX2 TXNDC3	NME NM23 family member	5.74397518615571e-7	1.2699406957027896e-4	TRUE	TRUE	TRUE
ENOG411CWSX	126	169	180	272	2.955773264178063	3.6761434926371783	0.48747109426593893	0.5094895757080231	147.5	226	4.6894733110087525	ENOG411CWSX	1150850, 120577592, 147900510, 148232054, 54873684, Xelaev18039699m.g, Xelaev18026411m.g	GenBank, Xenbase_9.1	hsp90aa1.1.L, hsp90ab1.L	heat shock protein 90 [Xenopus laevis], LOC100037031 protein [Xenopus laevis], heat shock protein 90kDa alpha (cytosolic), class A member 1, gene 1 [Xenopus laevis], heat shock protein 90kDa alpha (cytosolic), class B member 1 [Xenopus laevis], Hsp90alpha [Xenopus laevis], NA	Q58FF6, Q14568, Q58FG0, P07900, P08238	HSP90AB4P, HSP90AA2P, HSP90AA5P, HSP90AA1, HSP90AB1	NA, HSP90AA2 HSPCAL3, HSP90AE, HSP90A HSPC1 HSPCA, HSP90B HSPC2 HSPCB	Heat shock protein 90kDa alpha (Cytosolic), class	1.3695457771334612e-6	2.5304725931025605e-4	TRUE	TRUE	TRUE
ENOG411CW2A	1	1	11	18	2.868806308878135	3.7480326349455995	2.561272394676056	3.0740508843694583	1	14.5	4.678811687196995	ENOG411CW2A	Xelaev18041001m.g, Xelaev18040017m.g	Xenbase_9.1	hectd1.S, hectd1.L	NA	Q9ULT8	HECTD1	KIAA1131	HECT domain containing E3 ubiquitin protein ligase 1	1.4427114575216286e-6	2.5304725931025605e-4	TRUE	TRUE	TRUE
ENOG411CQT4	18	35	46	74	3.4462727622393894	3.167769908955847	1.2829712321889515	0.8850170599794408	26.5	60	4.676834423859337	ENOG411CQT4	147905081, 148228458, Xelaev18020350m.g, Xelaev18017107m.g	GenBank, Xenbase_9.1	gfpt1.S, gfpt2.L	glutamine-fructose-6-phosphate transaminase 2 [Xenopus laevis], glutamine--fructose-6-phosphate transaminase 1 [Xenopus laevis], NA	Q06210, O94808	GFPT1, GFPT2	GFAT GFPT, NA	glutamine-fructose-6-phosphate transaminase	1.4566865256346976e-6	2.5304725931025605e-4	TRUE	TRUE	TRUE
ENOG411CXCD	85	105	126	188	2.7115699653956566	3.8768285678781202	0.5387298260249673	0.6604453405837457	95	157	4.658701280037391	ENOG411CXCD	147906202, 44968271, 67678232, Xelaev18014277m.g, Xelaev18011525m.g	GenBank, Xenbase_9.1	cct8.S, cct8.L	chaperonin containing TCP1, subunit 8 (theta) [Xenopus laevis], chaperonin subunit 8 theta [Xenopus laevis], Unknown (protein for MGC:114776) [Xenopus laevis], NA	P50990	CCT8	C21orf112 CCTQ KIAA0002	chaperonin containing Tcp1, subunit 8 (theta)	1.5910528540221622e-6	2.5796270273212654e-4	TRUE	TRUE	TRUE
ENOG411CUKV	11	29	30	70	2.924050868940299	3.6003641842283405	1.3455437036206186	1.0689798948220357	20	50	4.613458127371134	ENOG411CUKV	111185527, 124481898, 125858544, 147902627, 148229642, 351722080, 50415403, 51703510, 51704144, 68533947, Xelaev18001628m.g, Xelaev18001648m.g, Xelaev18047951m.g, Xelaev18036220m.g, Xelaev18001975m.g, Xelaev18001671m.g, Xelaev18047956m.g, Xelaev18036221m.g, Xelaev18001974m.g, Xelaev18036219m.g	GenBank, Xenbase_9.1	gbp4.L, Xelaev18001648m.g, gbp7.S, Xelaev18036220m.g, Xelaev18001975m.g, gbp6.1, gbp5.S, Xelaev18036221m.g, Xelaev18001974m.g, gbp2.L	LOC398692 protein [Xenopus laevis], Unknown (protein for MGC:160143) [Xenopus laevis], LOC100037176 protein [Xenopus laevis], guanylate binding protein 2, interferon-inducible [Xenopus laevis], guanylate binding protein 4 [Xenopus laevis], guanylate binding protein 7 [Xenopus laevis], Unknown (protein for MGC:82969) [Xenopus laevis], MGC82824 protein [Xenopus laevis], LOC446944 protein [Xenopus l…	Q96PP9, Q6ZN66, Q8N8V2	GBP4, GBP6, GBP7	NA, GBP4L	Guanylate binding protein	1.9801203777284843e-06	2.862253781578782e-4	TRUE	TRUE	TRUE
ENOG411D16P	6	14	19	48	2.5670199486130567	3.9446111631324228	1.490883066784658	1.533942619432562	10	33.5	4.604418515700526	ENOG411D16P	Xelaev18039175m.g	Xenbase_9.1	skiv2l.L	NA	Q15477	SKIV2L	DDX13 SKI2W SKIV2 W	superkiller viralicidic activity 2-like (S. cerevisiae	2.0680996227693438e-6	2.862253781578782e-4	TRUE	TRUE	TRUE
ENOG411CPSC	37	61	70	116	3.115377495461505	3.38917071693479	0.8781295000159962	0.7422917801224018	49	93	4.599410149540256	ENOG411CPSC	147906687, Xelaev18017962m.g, Xelaev18016428m.g, Xelaev18014080m.g, Xelaev18014079m.g, Xelaev18017961m.g	GenBank, Xenbase_9.1	loc100498358.L, loc100489234.S, Xelaev18014080m.g, Xelaev18014079m.g, fam115a-like.L	hypothetical protein LOC494989 [Xenopus laevis], NA	A6NFQ2, Q9Y4C2, A0A1B0GVM2	TCAF2, TCAF1, TCAF2C	FAM115C FAM139A, FAM115A KIAA0738, NA	Family with sequence similarity 115, member	2.11844441070798e-6	2.862253781578782e-4	TRUE	TRUE	TRUE
ENOG411CSFD	0	2	9	18	2.986748876917781	3.4061621823762818	3.298237988842262	2.4890883836483018	1	13.5	4.520470761549307	ENOG411CSFD	1334661, 147903139, 148229787, 391931	GenBank	NA	NAD(+) ADP-ribosyltransferase [Xenopus laevis], poly [ADP-ribose] polymerase 1 [Xenopus laevis], uncharacterized protein LOC734426 [Xenopus laevis], poly(ADP-ribose) polymerase [Xenopus laevis]	P09874	PARP1	ADPRT PPOL	Poly (ADP-ribose) polymerase 1	3.085113351000457e-6	3.829743683235003e-4	TRUE	TRUE	TRUE
ENOG411DGH8	0	0	7	15	2.633969638914541	3.7527589101398338	2.9763098939548995	3.826123370925872	0	11	4.516099066634068	ENOG411DGH8	148230338, Xelaev18025110m.g	GenBank, Xenbase_9.1	wdr78.S	WD repeat domain 78 [Xenopus laevis], NA	Q5VTH9	WDR78	NA	WD repeat domain 78	3.149460265818259e-6	3.829743683235003e-4	TRUE	TRUE	TRUE
ENOG411CZU7	10	13	23	47	2.2217178053130264	4.027254868770062	1.1018407760387585	1.6037309495894243	11.5	35	4.418690953293584	ENOG411CZU7	147901681, 148225510, Xelaev18035380m.g	GenBank, Xenbase_9.1	trim29.L	tripartite motif containing 29 [Xenopus laevis], MGC80203 protein [Xenopus laevis], NA	Q14134	TRIM29	ATDC	tripartite motif containing 29	4.9650261058996405e-6	5.749973090260917e-4	TRUE	TRUE	TRUE
ENOG411CW05	2	2	15	15	3.1304998897856104	2.989361079831497	2.3913473932337435	2.241160870204716	2	15	4.327395191535136	ENOG411CW05	115528674, 158564272, 47125206, 66911532, 80477530, Xelaev18003589m.g	GenBank, Xenbase_9.1	ctu2.L	Unknown (protein for MGC:154644) [Xenopus laevis], RecName: Full=Cytoplasmic tRNA 2-thiolation protein 2 B, LOC431806 protein [Xenopus laevis], Unknown (protein for IMAGE:6633620) [Xenopus laevis], NA	Q2VPK5	CTU2	C16orf84 NCS2	cytosolic thiouridylase subunit 2 homolog (S. pombe)	7.544155105137723e-6	8.339720552588611e-4	TRUE	TRUE	TRUE
ENOG411CX8K	2	1	13	14	2.818378409327898	3.21737393407535	2.1987023152913476	2.733013966534391	1.5	13.5	4.267921411583031	ENOG411CX8K	157423663, 161611784, Xelaev18012918m.g, Xelaev18015491m.g	GenBank, Xenbase_9.1	ranbp2.L, ranbp2.S	LOC100126652 protein [Xenopus laevis], LOC100127327 protein [Xenopus laevis], NA	P49792, Q7Z3J3, A6NKT7, Q99666, O14715, P0DJD1, P0DJD0	RANBP2, RGPD4, RGPD3, RGPD5; RGPD6, RGPD8, RGPD2, RGPD1	NUP358, RGP4, RGP3, RANBP2L1 RGP5 RGP7 RGPD7; RANBP2L2 RGP6, RANBP2ALPHA RANBP2L1 RANBP2L3, RANBP2L2 RGP2, RANBP2L6 RGP1	RAN binding protein 2	9.86514035942631e-6	0.0010431313632228167	TRUE	TRUE	TRUE
ENOG411CTT2	4	6	15	28	2.4958714353901668	3.516937759045748	1.654381799067537	1.8767494439958403	5	21.5	4.251698155366458	ENOG411CTT2	147899332, 148230258, Xelaev18014241m.g, Xelaev18011569m.g	GenBank, Xenbase_9.1	gbe1.S, gbe1.L	glucan (1,4-alpha-), branching enzyme 1 (glycogen branching enzyme, Andersen disease, glycogen storage disease type IV) [Xenopus laevis], glucan (1,4-alpha-), branching enzyme 1 [Xenopus laevis], NA	Q04446	GBE1	NA	Glucan (1,4-alpha-), branching enzyme 1	1.060778386919621e-5	0.0010749220987452159	TRUE	TRUE	TRUE
ENOG411CY7P	19	29	37	70	2.34967182166493	3.6003641842283405	0.9023093125111226	1.0689798948220357	24	53.5	4.207310808071252	ENOG411CY7P	148230798, Xelaev18040643m.g, Xelaev18042803m.g	GenBank, Xenbase_9.1	copa.L, copa.S	coatomer protein complex, subunit alpha [Xenopus laevis], NA	P53621	COPA	NA	Coatomer protein complex subunit alpha	1.2921379921180698e-5	0.001216495666014099	TRUE	TRUE	TRUE
ENOG411CS6K	0	0	3	19	1.7242131620693701	4.223752929620049	1.9763098939548995	4.148051465813235	0	11	4.205847157701234	ENOG411CS6K	Xelaev18026429m.g	Xenbase_9.1	cul9.L	NA	Q8IWT3, Q14999	CUL9, CUL7	H7AP1 KIAA0708 PARC, KIAA0076	Cullin 9	1.3005299061005994e-5	0.001216495666014099	TRUE	TRUE	TRUE
ENOG411CYEA	8	10	23	31	2.656609028382552	2.9667790247126	1.3913473932337432	1.366691752288575	9	27	3.9763358255869985	ENOG411CYEA	147899700, 262176855, Xelaev18036194m.g	GenBank, Xenbase_9.1	pold1.L	DNA-directed DNA polymerase delta 1 [Xenopus laevis], DNA polymerase delta [Xenopus laevis], NA	P28340	POLD1	POLD	polymerase (DNA directed), delta 1, catalytic subunit	3.499263767177336e-5	0.003151929437694549	TRUE	TRUE	TRUE
ENOG411CP6U	10	18	25	46	2.494111425331205	3.0876591509693694	1.2173179934586944	1.1327847091599241	14	35.5	3.9469078255296792	ENOG411CP6U	148228559, Xelaev18036111m.g, Xelaev18037832m.g	GenBank, Xenbase_9.1	Xelaev18036111m.g, otog.S	otogelin precursor [Xenopus laevis], NA	Q3ZCN5	OTOGL	C12orf64	Otogelin-like	3.9583508617161426e-5	0.0033982771857141818	TRUE	TRUE	TRUE
Xelaev18037980m.g	1	6	5	32	1.6181265945922993	3.9556997262050846	1.561272394676056	2.0631625682267214	3.5	18.5	3.9412903885918946	Xelaev18037980m.g	NA	Xenbase_9.1	ubr4.S	NA	NA	NA	NA	NA	4.052221973096681e-5	0.0033982771857141818	TRUE	TRUE	TRUE
ENOG411CR0G	8	16	24	39	2.790886509527072	2.713496988391612	1.4502410822873117	1.0605886245628953	12	31.5	3.8921868976296294	ENOG411CR0G	148235299, Xelaev18035401m.g	GenBank, Xenbase_9.1	arcn1.L	archain 1 [Xenopus laevis], NA	P48444	ARCN1	COPD	Archain 1	4.967233275637118e-5	0.00402677044211649	TRUE	TRUE	TRUE
ENOG411CX8F	2	2	10	16	2.288624929864663	3.133556863269196	1.8507790118710405	2.328623711455055	2	13	3.8340615147511854	ENOG411CX8F	Xelaev18018015m.g	Xenbase_9.1	vps13c.L	NA	Q709C8	VPS13C	KIAA1421	vacuolar protein sorting 13 homolog C (S. cerevisiae)	6.30222990492678e-5	0.004944201009284494	TRUE	TRUE	TRUE
ENOG411CXJA	25	38	46	76	2.428974117182841	2.9686913009444	0.8304590274914448	0.8075076927585256	31.5	61	3.8167258197338936	ENOG411CXJA	114108108, 12004634, 148236729, Xelaev18037847m.g	GenBank, Xenbase_9.1	ruvbl2.S	LOC398205 protein [Xenopus laevis], reptin [Xenopus laevis], RuvB-like protein 2 [Xenopus laevis], NA	Q9Y230	RUVBL2	INO80J TIP48 TIP49B	RuvB-like 2 (E. coli)	6.761715209371913e-5	0.005138903559122654	TRUE	TRUE	TRUE
ENOG411CRY3	4	2	12	18	1.9728834436347125	3.4061621823762818	1.3548215172086295	2.4890883836483018	3	15	3.803559638464211	ENOG411CRY3	160420251, Xelaev18027821m.g	GenBank, Xenbase_9.1	hdlbp.L	high density lipoprotein binding protein (vigilin) [Xenopus laevis], NA	Q00341	HDLBP	HBP VGL	High density lipoprotein binding protein	7.131581761431866e-5	0.005255759649637061	TRUE	TRUE	TRUE
ENOG411CQT9	9	7	23	25	2.435470819257242	2.915859673352586	1.2393442997886936	1.5265630890669644	8	24	3.783962079694757	ENOG411CQT9	147900249	GenBank	NA	probable 2-oxoglutarate dehydrogenase E1 component DHKTD1, mitochondrial precursor [Xenopus laevis]	Q96HY7	DHTKD1	KIAA1630	dehydrogenase E1 and transketolase domain containing 1	7.717567536174733e-5	0.005520330661169691	TRUE	TRUE	TRUE
ENOG411CWNN	0	0	5	10	2.2260301295434397	3.0639678162237263	2.561272394676056	3.2855549895631695	0	7.5	3.7405934199148687	ENOG411CWNN	123899802, 125858668, 163916490, Xelaev18025296m.g, Xelaev18025463m.g, Xelaev18004431m.g, Xelaev18023208m.g, Xelaev18023420m.g, Xelaev18000744m.g	GenBank, Xenbase_9.1	loc100498184.S, loc101735200.S, loc100495666.L, loc100498184.L, loc101735200.L, loc100495666.S	RecName: Full=Tctex1 domain-containing protein 1-A, Tctex1d1-b protein [Xenopus laevis], NA	Q8N7M0	TCTEX1D1	NA	Tctex1 domain containing 1	9.179314654507563e-5	0.006201137011045109	TRUE	TRUE	TRUE
ENOG411DDA1	0	0	5	10	2.2260301295434397	3.0639678162237263	2.561272394676056	3.2855549895631695	0	7.5	3.7405934199148687	ENOG411DDA1	205360896, 54038535, Xelaev18001540m.g, Xelaev18004560m.g, Xelaev18001541m.g, Xelaev18001542m.g	GenBank, Xenbase_9.1	Xelaev18001540m.g, Xelaev18004560m.g, loc100493030.1.L, loc100488530-like.1.L	upregulator of cell proliferation [Xenopus laevis], LOC495219 protein [Xenopus laevis], NA	NA	NA	NA	Root hair defective 3 GTP-binding protein (RHD3)	9.179314654507563e-5	0.006201137011045109	TRUE	TRUE	TRUE
ENOG411CU2D	0	7	9	20	2.986748876917781	2.2417457659507942	3.298237988842262	1.2184407937046327	3.5	14.5	3.6971040173699055	ENOG411CU2D	148237932	GenBank	NA	aldehyde dehydrogenase 18 family, member A1 [Xenopus laevis]	P54886	ALDH18A1	GSAS P5CS PYCS	Aldehyde dehydrogenase 18 family, member A1	1.0903650227800404e-4	0.007166939825408265	TRUE	TRUE	TRUE
ENOG411CP8E	0	0	3	13	1.7242131620693701	3.4935613699496897	1.9763098939548995	3.6334782929834764	0	8	3.6895237542931416	ENOG411CP8E	Xelaev18033921m.g, Xelaev18032259m.g	Xenbase_9.1	ubr5.S, ubr5.L	NA	O95071	UBR5	EDD EDD1 HYD KIAA0896	Ubiquitin protein ligase E3 component n-recognin 5	1.1233712510277973e-4	0.007189576006577903	TRUE	TRUE	TRUE
ENOG411CPSN	6	10	14	35	1.7564387735413045	3.4099042669687125	1.0758455675058138	1.5366167537308875	8	24.5	3.653156197880559	ENOG411CPSN	147903615, Xelaev18006059m.g, Xelaev18009608m.g	GenBank, Xenbase_9.1	polr2b.L, polr2b.S	polymerase (RNA) II (DNA directed) polypeptide B, 140kDa [Xenopus laevis], NA	P30876	POLR2B	NA	polymerase (RNA) II (DNA directed) polypeptide B, 140kDa	1.2951827326678633e-4	0.008076626681662162	TRUE	TRUE	TRUE
ENOG411CTTX	4	29	17	55	2.808735559163646	2.321183928804353	1.8243068005098495	0.7265876973749579	16.5	36	3.627400856883194	ENOG411CTTX	116487829, 148234261, 159155359, Xelaev18013238m.g, Xelaev18005568m.g	GenBank, Xenbase_9.1	naa16-like.L, naa15.L	Narg1l protein [Xenopus laevis], putative N-terminal acetyltransferase [Xenopus laevis], NA	Q9BXJ9, Q6N069	NAA15, NAA16	GA19 NARG1 NATH TBDN100, NARG1L NAT2	NatA auxiliary subunit	1.4314432432182002e-4	0.008703174918766658	TRUE	TRUE	TRUE
ENOG411CTZP	0	0	3	12	1.7242131620693701	3.356472987515909	1.9763098939548995	3.5265630890669644	0	7.5	3.5925876294523205	ENOG411CTZP	11761138, 2749954, Xelaev18031990m.g	GenBank, Xenbase_9.1	prkdc.L	DNA-dependent protein kinase catalytic subunit [Xenopus laevis], DNA-dependent protein kinase [Xenopus laevis], NA	P78527	PRKDC	HYRC HYRC1	protein kinase, DNA-activated, catalytic polypeptide	1.6370524928842082e-4	0.00951163022974181	TRUE	TRUE	TRUE
ENOG411CZFR	12	13	21	42	1.5217267781185189	3.5526061829946873	0.7353017944511047	1.4450332035703661	12.5	31.5	3.5880952468015614	ENOG411CZFR	Xelaev18038546m.g	Xenbase_9.1	aifm1.L	NA	O95831	AIFM1	AIF PDCD8	Apoptosis-inducing factor, mitochondrion-associated, 1	1.6655130518958936e-4	0.00951163022974181	TRUE	TRUE	TRUE
ENOG411CYCR	46	71	77	114	2.7115603272154734	2.3591948134407628	0.7071232611395104	0.5016884204279353	58.5	95.5	3.5855653456945697	ENOG411CYCR	147899563, Xelaev18047373m.g	GenBank, Xenbase_9.1	ndufs1.S	NADH dehydrogenase (ubiquinone) Fe-S protein 1, 75kDa (NADH-coenzyme Q reductase) [Xenopus laevis], NA	P28331	NDUFS1	NA	NADH dehydrogenase (ubiquinone) Fe-S protein 1, 75kDa (NADH-coenzyme Q reductase)	1.681743831738889e-4	0.00951163022974181	TRUE	TRUE	TRUE
ENOG411CSQS	0	0	4	10	1.9909858702087517	3.0639678162237263	2.298237988842262	3.2855549895631695	0	7	3.574392030260342	ENOG411CSQS	10443732, 10443734, 10443736, 10443738, 10443740, 10443742, 10443744, 10443746, 11527142, 11527144, 11527146, 11527148, 11527150, 11527152, 11527154, 11527156, 11527158, 11527160, 11527162, 11527164, 11527166, 11527170, 11527172, 11527174, 11527176, 11527178, 11527180, 147907112, 148232260, 29124575, 49257872, 603213, Xelaev18037152m.g, Xelaev18009360m.g, Xelaev18020277m.g, Xelaev18034897m.g, Xel…	GenBank, Xenbase_9.1	camk2g.S, camk2d.S, Xelaev18020277m.g, camk2g.L, camk2d.L, camk2a.S, Xelaev18018622m.g	calcium/calmodulin-dependent protein kinase II delta12 subunit [Xenopus laevis], calcium/calmodulin-dependent protein kinase II gamma J subunit [Xenopus laevis], calcium/calmodulin-dependent protein kinase II gamma K subunit [Xenopus laevis], calcium/calmodulin-dependent protein kinase II gamma L subunit [Xenopus laevis], calcium/calmodulin-dependent protein kinase II gamma M subunit [Xenopus lae…	Q13555, Q13554, Q13557, Q9UQM7	CAMK2G, CAMK2B, CAMK2D, CAMK2A	CAMK CAMK-II CAMKG, CAM2 CAMK2 CAMKB, CAMKD, CAMKA KIAA0968	calcium calmodulin-dependent protein kinase II	1.755213157687037e-4	0.009701541817033804	TRUE	TRUE	TRUE
ENOG411CZFZ	3	11	10	34	1.9175941733574224	3.1007105850587315	1.4357415125921968	1.3704438871496825	7	22	3.548477324736781	ENOG411CZFZ	125858590	GenBank	NA	LOC100037192 protein [Xenopus laevis]	Q92499	DDX1	NA	DEAD (Asp-Glu-Ala-Asp) box helicase 1	1.9373267911283076e-4	0.010278087704467542	TRUE	TRUE	FALSE
ENOG411CPU1	5	7	13	27	1.8557508446051971	3.1612642282795465	1.1987023152913476	1.6334782929834764	6	20	3.547565379351923	ENOG411CPU1	148228118	GenBank	NA	nucleoporin 155kDa [Xenopus laevis]	O75694	NUP155	KIAA0791	Nucleoporin 155kDa	1.944046194101591e-4	0.010278087704467542	TRUE	TRUE	FALSE
ENOG411CYM3	5	9	17	25	2.5279469996385306	2.4499171667471433	1.5612723946760556	1.204634994179602	7	21	3.51988150787683	ENOG411CYM3	147902002, 163915947, Xelaev18002646m.g	GenBank, Xenbase_9.1	ddx4.S	probable ATP-dependent RNA helicase DDX4 [Xenopus laevis], Unknown (protein for IMAGE:8328523) [Xenopus laevis], NA	Q9NQI0	DDX4	VASA	DEAD (Asp-Glu-Ala-Asp) box polypeptide 4	2.1586981525818552e-4	0.011170114695912918	TRUE	TRUE	FALSE
ENOG411CRQ4	3	9	14	24	2.643005938135107	2.318033111774157	1.883200489563418	1.1480514658132346	6	19	3.507984353922107	ENOG411CRQ4	148237916, Xelaev18027479m.g, Xelaev18029610m.g	GenBank, Xenbase_9.1	lpp.L, lpp.S	LIM domain containing preferred translocation partner in lipoma [Xenopus laevis], NA	Q93052, Q15654	LPP, TRIP6	NA, OIP1	LIM domain containing preferred translocation partner in lipoma	2.2575780195455454e-4	0.011438395299030762	TRUE	TRUE	FALSE
ENOG411CXK8	0	0	3	11	1.7242131620693701	3.21354738998804	1.9763098939548995	3.4110858716470287	0	7	3.491523970235225	ENOG411CXK8	148922158, Xelaev18046718m.g	GenBank, Xenbase_9.1	srp68.S	LOC100101323 protein [Xenopus laevis], NA	Q9UHB9	SRP68	NA	Signal-recognition-particle assembly has a crucial role in targeting secretory proteins to the rough endoplasmic reticulum membrane (By similarity)	2.4013668441153876e-4	0.011918620744670658	TRUE	TRUE	FALSE
ENOG411CRKW	0	3	10	10	3.1483666953652576	1.7683073289632851	3.435741512592197	1.2855549895631695	1.5	10	3.476613543486465	ENOG411CRKW	12025476, 147905646, 148228344, 213626677, 27447665, 47937568, Xelaev18010553m.g, Xelaev18010552m.g, Xelaev18035073m.g, Xelaev18007708m.g, Xelaev18037256m.g	GenBank, Xenbase_9.1	Xelaev18010553m.g, arvcf.S, ctnnd1.L, arvcf.L, ctnnd1.S	p120 [Xenopus laevis], armadillo repeat gene deletes in velo-cardio-facial syndrome [Xenopus laevis], catenin delta-1 [Xenopus laevis], Arvcf protein [Xenopus laevis], p120 isoform 2 [Xenopus laevis], NA	O60716, O00192	CTNND1, ARVCF	KIAA0384, NA	Catenin (Cadherin-associated protein), delta 1	2.538945832946387e-4	0.012349432531451227	TRUE	TRUE	FALSE
ENOG411CZEP	8	16	21	37	2.3767055366977874	2.497877455459109	1.2658165111498842	0.9865880431191186	12	29	3.4468506892107524	ENOG411CZEP	148228961, 148236079, Xelaev18019761m.g, Xelaev18016698m.g	GenBank, Xenbase_9.1	dnm1l.S, dnm1l.L	dynamin 1-like [Xenopus laevis], similar to dynamin 1-like [Xenopus laevis], NA	O00429	DNM1L	DLP1 DRP1	Dynamin 1-like	2.8358097013502593e-4	0.013373304453553126	TRUE	TRUE	FALSE
ENOG411CQD9	55	59	82	102	2.214627182226687	2.6567864325523183	0.5439944032442201	0.6057333025005722	57	92	3.4446096009747063	ENOG411CQD9	120538734, 125097, 125106, 125112, 13111394, 147900165, 148235126, 205360860, 213626069, 50927218, Xelaev18016077m.g, Xelaev18013610m.g, Xelaev18016073m.g, Xelaev18013619m.g, Xelaev18013613m.g, Xelaev18016074m.g, Xelaev18013621m.g, Xelaev18013617m.g, Xelaev18013614m.g, Xelaev18016081m.g, Xelaev18013620m.g, Xelaev18016076m.g, Xelaev18013615m.g, Xelaev18013623m.g, Xelaev18016082m.g, Xelaev18013626m…	GenBank, Xenbase_9.1	loc100490994.S, krt8.L, krt6.S, krt5.6.L, Xelaev18013613m.g, Xelaev18016074m.g, Xelaev18013621m.g, Xelaev18013617m.g, Xelaev18013614m.g, krt5.3.S, krt75.L, Xelaev18016076m.g, krt5.1-like.1.L, krt5.3.L, krt5.7.S, krt5.7.L, loc100490994.L, Xelaev18013612m.g, Xelaev18013616m.g, Xelaev18013622m.g	LOC100036944 protein [Xenopus laevis], RecName: Full=Keratin, type II cytoskeletal I; AltName: Full=Clone PUF23, RecName: Full=Keratin, type II cytoskeletal; AltName: Full=XENCK55(5/6), RecName: Full=Keratin, type II cytoskeletal 8; AltName: Full=Cytokeratin-8; Short=CK-8; AltName: Full=Keratin-8; Short=K8, larval keratin XLK [Xenopus laevis], keratin 5, gene 2 [Xenopus laevis], keratin 8 [Xenopu…	P02538, P04259, P48668, P13647, O95678, P08729	KRT6A, KRT6B, KRT6C, KRT5, KRT75, KRT7	K6A KRT6D, K6B KRTL1, KRT6E, NA, K6HF KB18, SCL	keratin, type II cytoskeletal	2.859423649608399e-4	0.013373304453553126	TRUE	TRUE	FALSE
ENOG411CSB0	52	79	77	131	2.111144770429591	2.742750468166894	0.5337916582539485	0.5485893953969634	65.5	104	3.4322222383806698	ENOG411CSB0	147905294, 148232786, 4973189, Xelaev18028947m.g	GenBank, Xenbase_9.1	tcp1.S	similar to t-complex polypeptide 1 [Xenopus laevis], t-complex 1 [Xenopus laevis], t-complex polypeptide 1 [Xenopus laevis], NA	P17987	TCP1	CCT1 CCTA	T-complex protein 1 subunit alpha	2.993283829613483e-4	0.013735219384188662	TRUE	TRUE	FALSE
ENOG411CW58	65	98	88	163	1.7584264745797584	3.0831100920995698	0.4076492055628439	0.5543187554643465	81.5	125.5	3.423483337661588	ENOG411CW58	1045604, 117949833, Xelaev18042878m.g, Xelaev18042888m.g	GenBank, Xenbase_9.1	Xelaev18042878m.g, Xelaev18042888m.g	CCTgamma [Xenopus laevis], RecName: Full=T-complex protein 1 subunit gamma; Short=TCP-1-gamma; AltName: Full=CCT-gamma, NA	P49368	CCT3	CCTG TRIC5	Chaperonin containing Tcp1, subunit 3 (Gamma)	3.09120209297868e-4	0.013921858315044723	TRUE	TRUE	FALSE
ENOG411CQFY	59	105	89	161	2.3711840985092256	2.4598062190019747	0.5612723946760556	0.43805291924729783	82	125	3.4160260133587217	ENOG411CQFY	148232533, Xelaev18017545m.g	GenBank, Xenbase_9.1	cct2.L	chaperonin containing TCP1, subunit 2 (beta) [Xenopus laevis], NA	P78371	CCT2	99D8.1 CCTB	Chaperonin containing TCP1, subunit 2 (Beta)	3.177108831917807e-4	0.014048597598589285	TRUE	TRUE	FALSE
ENOG411CW4Z	4	6	11	24	1.7804620807713842	3.0361935174437478	1.2393442997886936	1.6626246386429928	5	17.5	3.405889836138066	ENOG411CW4Z	147901444, 148233978, Xelaev18010300m.g, Xelaev18009673m.g, Xelaev18007338m.g	GenBank, Xenbase_9.1	dnaja4.1.S, dnaja1.S, dnaja4.1.L	DnaJ (Hsp40) homolog, subfamily A, member 4, gene 1 [Xenopus laevis], DnaJ (Hsp40) homolog, subfamily A, member 1 [Xenopus laevis], NA	P31689, Q8WW22	DNAJA1, DNAJA4	DNAJ2 HDJ2 HSJ2 HSPF4, NA	DnaJ (Hsp40) homolog, subfamily A, member	3.29743923389607e-4	0.014151247429092313	TRUE	TRUE	FALSE
ENOG411CY0R	0	1	5	10	2.2260301295434397	2.588376427770156	2.561272394676056	2.2855549895631695	0.5	7.5	3.4042995240654244	ENOG411CY0R	148226567, 148234696, Xelaev18041364m.g	GenBank, Xenbase_9.1	irf2bpl.S	interferon regulatory factor 2-binding protein-like A [Xenopus laevis], interferon regulatory factor 2-binding protein-like B [Xenopus laevis], NA	Q8IU81, Q9H1B7	IRF2BP1, IRF2BPL	NA, C14orf4 EAP1 KIAA1865	Interferon regulatory factor 2 binding	3.316698616193511e-4	0.014151247429092313	TRUE	TRUE	FALSE
ENOG411CX3D	18	27	28	64	1.4196735545922066	3.3768603076941335	0.5863633756388862	1.0411362618967226	22.5	46	3.3916616202135725	ENOG411CX3D	148225797, Xelaev18040780m.g, Xelaev18042893m.g	GenBank, Xenbase_9.1	ndufs2.L, ndufs2.S	NADH dehydrogenase (ubiquinone) Fe-S protein 2, 49kDa (NADH-coenzyme Q reductase) [Xenopus laevis], NA	O75306	NDUFS2	NA	NADH dehydrogenase (Ubiquinone) Fe-S protein 2, 49kDa (NADH-coenzyme Q reductase)	3.4735088821279526e-4	0.014564782071267553	TRUE	TRUE	FALSE
ENOG411CVJR	1	7	9	20	2.512832829922995	2.2417457659507942	2.298237988842262	1.2184407937046327	4	14.5	3.3619947668267702	ENOG411CVJR	148224403, Xelaev18012674m.g, Xelaev18018318m.g	GenBank, Xenbase_9.1	unc45b.L, unc45a.L	protein unc-45 homolog B [Xenopus laevis], NA	Q8IWX7, Q9H3U1	UNC45B, UNC45A	CMYA4 UNC45, SMAP1	Unc-45 homolog	3.8690795052434497e-4	0.015948476875850964	TRUE	TRUE	FALSE
ENOG411CPD2	1	6	7	21	2.1053601558786528	2.6408441249319607	1.9763098939548995	1.4782000675055653	3.5	14	3.3560732318578053	ENOG411CPD2	Xelaev18038499m.g	Xenbase_9.1	ercc6l.L	NA	Q2NKX8	ERCC6L	PICH	excision repair cross-complementing rodent repair deficiency, complementation group 6-like	3.9528815878080327e-4	0.016022346702581892	TRUE	TRUE	FALSE
ENOG411CVE5	1	6	9	18	2.512832829922995	2.207542999093408	2.298237988842262	1.2666959623118537	3.5	13.5	3.337809758446569	ENOG411CVE5	49119610, Xelaev18026434m.g	GenBank, Xenbase_9.1	aars2.L	LOC443692 protein [Xenopus laevis], NA	Q5JTZ9	AARS2	AARSL KIAA1270	Alanyl-tRNA synthetase 2, mitochondrial	4.2220771228800036e-4	0.016617327430617106	TRUE	TRUE	FALSE
ENOG411D0BQ	11	22	22	50	1.8717222917157728	2.8473294526687165	0.9149093492907562	0.9749867568403551	16.5	36	3.3368734892244785	ENOG411D0BQ	148228541, 148228545, 1753195	GenBank	NA	DNA replication licensing factor mcm5-A [Xenopus laevis], DNA replication licensing factor mcm5-B [Xenopus laevis], xCDC46 [Xenopus laevis]	P33992	MCM5	CDC46	Minichromosome maintenance complex component 5	4.236325249581663e-4	0.016617327430617106	TRUE	TRUE	FALSE
ENOG411CZRH	21	25	39	50	2.265373735056066	2.4070242652162155	0.8388063702049646	0.798108994756276	23	44.5	3.3038843103949938	ENOG411CZRH	148227728, Xelaev18008754m.g	GenBank, Xenbase_9.1	dctn1.S	dynactin subunit 1 [Xenopus laevis], NA	Q14203	DCTN1	NA	Dynactin 1	4.7677586728947307e-4	0.01840506205155553	TRUE	TRUE	FALSE
ENOG411CWA4	27	40	31	96	0.4576095406086558	4.1925943830681645	0.16895497189729536	1.0684842084949164	33.5	63.5	3.2881907283321694	ENOG411CWA4	152012986, Xelaev18010449m.g, Xelaev18007546m.g	GenBank, Xenbase_9.1	gcn1.S, gcn1.L	LOC100125671 protein [Xenopus laevis], NA	Q92616	GCN1	GCN1L1 KIAA0219	GCN1 general control of amino-acid synthesis 1-like 1 (Yeast)	5.041675151424509e-4	0.019158365575413134	TRUE	TRUE	FALSE
ENOG411DGNV	0	0	3	9	1.7242131620693701	2.9067072035753396	1.9763098939548995	3.148051465813235	0	6	3.2745551936822603	ENOG411DGNV	148225204, 5731283, Xelaev18033401m.g, Xelaev18027361m.g, Xelaev18031618m.g	GenBank, Xenbase_9.1	dsp.S, Xetrov90014283m.L, dsp.L	uncharacterized protein LOC494849 [Xenopus laevis], desmoplakin-related protein [Xenopus laevis], NA	NA	NA	NA	Desmoplakin	5.291423168389435e-4	0.019798063300804778	TRUE	TRUE	FALSE
ENOG411CZJ3	20	39	39	68	2.416595876081219	2.2071312518135935	0.9059205660635016	0.6127197328166789	29.5	53.5	3.2694688064906208	ENOG411CZJ3	117167935, 148229816, 36939185	GenBank	NA	IsoT protein [Xenopus laevis], ubiquitin specific peptidase 5 (isopeptidase T) [Xenopus laevis], isopeptidase T [Xenopus laevis]	P45974	USP5	ISOT	ubiquitin specific peptidase 5 (isopeptidase T)	5.387480847033744e-4	0.019850058740860255	TRUE	TRUE	FALSE
ENOG411D1F9	0	1	1	17	0.9954389325039961	3.62230831395674	0.9763098939548995	2.9960483723681848	0.5	9	3.2652403917778936	ENOG411D1F9	1129173, 147903475, 300087, 49255967, Xelaev18033196m.g, Xelaev18031144m.g	GenBank, Xenbase_9.1	kif15.S, kif15.L	KLP2 protein [Xenopus laevis], kinesin-like protein KIF15-B [Xenopus laevis], Klp=kinesin-like protein {clone XKlp2} [Xenopus laevis, oocytes, Peptide Partial, 330 aa], Kif15-b protein [Xenopus laevis], NA	Q9NS87	KIF15	KLP2 KNSL7	Kinesin family member 15	5.468560590615284e-4	0.019850058740860255	TRUE	TRUE	FALSE
ENOG411CS25	0	0	5	6	2.2260301295434397	2.37324818251162	2.561272394676056	2.6334782929834764	0	5.5	3.25218088301835	ENOG411CS25	148225284, Xelaev18028714m.g, Xelaev18039876m.g, Xelaev18026190m.g	GenBank, Xenbase_9.1	ubr2.S, ubr1.L, ubr2.L	E3 ubiquitin-protein ligase UBR2 [Xenopus laevis], NA	Q8IWV8, Q8IWV7	UBR2, UBR1	C6orf133 KIAA0349, NA	Ubiquitin protein ligase E3 component n-recognin	5.726155747672025e-4	0.020182624316432415	TRUE	TRUE	FALSE
ENOG411CWF5	0	0	5	6	2.2260301295434397	2.37324818251162	2.561272394676056	2.6334782929834764	0	5.5	3.25218088301835	ENOG411CWF5	147898493, 147902708, 148231857, 148232206, 148237296, Xelaev18025628m.g, Xelaev18023617m.g, Xelaev18023618m.g, Xelaev18023396m.g, Xelaev18023401m.g, Xelaev18023395m.g, Xelaev18023394m.g, Xelaev18025444m.g, Xelaev18025445m.g, Xelaev18023399m.g, Xelaev18025443m.g	GenBank, Xenbase_9.1	fmo5.S, loc100496770-like.L, fmo5.L, fmo2.L, loc100489107.L, fmo3.L, fmo1.L, loc100489254.S, loc100489107.S, loc100489254.L, fmo2.S	flavin containing monooxygenase 5 [Xenopus laevis], MGC81930 protein [Xenopus laevis], uncharacterized protein LOC494799 [Xenopus laevis], flavin containing monooxygenase 3 [Xenopus laevis], flavin containing monooxygenase 2 (non-functional) [Xenopus laevis], NA	P49326, P31513, O60774, Q01740, Q99518	FMO5, FMO3, FMO6P, FMO1, FMO2	NA, FMO6	Dimethylaniline monooxygenase (N-oxide-forming)	5.726155747672025e-4	0.020182624316432415	TRUE	TRUE	FALSE
ENOG411CU6G	17	17	24	49	1.0397872013641498	3.5345925702688414	0.4502410822873118	1.3000545592582846	17	36.5	3.2345749562442583	ENOG411CU6G	148230897, 1490630, 27924242	GenBank	NA	nuclear pore complex protein Nup93 [Xenopus laevis], An4b [Xenopus laevis], Dye protein [Xenopus laevis]	Q8N1F7	NUP93	KIAA0095	Nucleoporin 93kDa	6.091196942819924e-4	0.021026040220551448	TRUE	TRUE	FALSE
ENOG411CQAK	4	7	14	20	2.3295183797646595	2.2417457659507942	1.5612723946760556	1.2184407937046327	5.5	17	3.232371876030327	ENOG411CQAK	148228442, 148229654, 148230348, 32450205, 52430509, Xelaev18046869m.g	GenBank, Xenbase_9.1	ddx5.S	DEAD (Asp-Glu-Ala-Asp) box polypeptide 17 [Xenopus laevis], DEAD (Asp-Glu-Ala-Asp) box polypeptide 5 [Xenopus laevis], similar to DEAD/H (Asp-Glu-Ala-Asp/His) box polypeptide 5 (RNA helicase, 68kDa) [Xenopus laevis], LOC398649 protein [Xenopus laevis], DDX5 protein [Xenopus laevis], NA	Q92841, P17844	DDX17, DDX5	NA, G17P1 HELR HLR1	DEAD (Asp-Glu-Ala-Asp) box helicase	6.138358781493228e-4	0.021026040220551448	TRUE	TRUE	FALSE
ENOG411DGCS	3	6	10	21	1.9175941733574224	2.6408441249319607	1.4357415125921968	1.4782000675055653	4.5	15.5	3.223302632340889	ENOG411DGCS	148234283, Xelaev18016099m.g, Xelaev18013645m.g	GenBank, Xenbase_9.1	lima1.S, lima1.L	LIM domain and actin binding 1 [Xenopus laevis], NA	NA	NA	NA	LIM domain and actin binding 1	6.336079658356495e-4	0.021401869068226383	TRUE	TRUE	FALSE
ENOG411DG9U	6	12	18	27	2.4166286719088332	2.067238054891378	1.4168824853408808	0.9330385748423845	9	22.5	3.1705725684571577	ENOG411DG9U	147902571, Xelaev18035836m.g, Xelaev18037633m.g	GenBank, Xenbase_9.1	trim28.L, trim28.S	tripartite motif containing 28 [Xenopus laevis], NA	Q13263	TRIM28	KAP1 RNF96 TIF1B	Nuclear corepressor for KRAB domain-containing zinc finger proteins (KRAB-ZFPs). Mediates gene silencing by recruiting CHD3, a subunit of the nucleosome remodeling and deacetylation (NuRD) complex, and SETDB1 (which specifically methylates histone H3 at 'Lys-9' (H3K9me)) to the promoter regions of KRAB target genes. Enhances transcriptional repression by coordinating the increase in H3K9me, the d…	7.60694131127214e-4	0.025342577080840884	TRUE	TRUE	FALSE
ENOG411CPBI	3	5	12	16	2.2994202450496406	2.1780351754940117	1.6767496120959917	1.3286237114550554	4	14	3.166039090326881	ENOG411CPBI	147901151, 147901506, Xelaev18009279m.g, Xelaev18005551m.g	GenBank, Xenbase_9.1	clgn.S, clgn.L	calnexin precursor [Xenopus laevis], calnexin [Xenopus laevis], NA	P27824, O14967	CANX, CLGN	NA	Calnexin	7.726501283888186e-4	0.025393042057319012	TRUE	TRUE	FALSE
ENOG411D0UW	5	18	15	38	2.2059103861779175	2.2643252248355026	1.3913473932337432	0.8635980763445351	11.5	26.5	3.1609339140491786	ENOG411D0UW	12004636, 148225893, Xelaev18023992m.g	GenBank, Xenbase_9.1	ruvbl1.L	pontin [Xenopus laevis], ruvB-like 1 [Xenopus laevis], NA	Q9Y265	RUVBL1	INO80H NMP238 TIP49 TIP49A	RuvB-like 1 (E. coli)	7.863208725154543e-4	0.02549776482610113	TRUE	TRUE	FALSE
ENOG411CZUT	0	1	5	8	2.2260301295434397	2.215567962696751	2.561272394676056	1.9960483723681846	0.5	6.5	3.140684130328271	ENOG411CZUT	147904611, 148237558, Xelaev18045947m.g, Xelaev18030801m.g	GenBank, Xenbase_9.1	lasp1.S, nebl-like.1.L	LIM and SH3 protein 1 [Xenopus laevis], NA	Q14847	LASP1	MLN50	LIM and SH3 protein 1	8.427685776570519e-4	0.02696859448502566	TRUE	TRUE	FALSE
ENOG411CR84	0	2	5	10	2.2260301295434397	2.1593502485445626	2.561272394676056	1.7005924888420134	1	7.5	3.1009322034284517	ENOG411CR84	148231079, Xelaev18039043m.g, Xelaev18042350m.g	GenBank, Xenbase_9.1	arhgap35.L, arhgap35.S	Rho GTPase activating protein 35 [Xenopus laevis], NA	Q9NRY4	ARHGAP35	GRF1 GRLF1 KIAA1722 P190A p190ARHOGAP	Rho GTPase activating protein 35	9.645622697568363e-4	0.030465135585047088	TRUE	TRUE	FALSE
ENOG411D2BD	3	9	10	25	1.9175941733574224	2.4499171667471433	1.4357415125921968	1.204634994179602	6	17.5	3.088296885497084	ENOG411D2BD	148232822, Xelaev18039164m.g, Xelaev18042446m.g	GenBank, Xenbase_9.1	crat.2.L, crat.2.S	carnitine O-acetyltransferase, gene 2 [Xenopus laevis], NA	NA	NA	NA	Choline/Carnitine o-acyltransferase	0.0010065362585293324	0.031228544508985365	TRUE	TRUE	FALSE
ENOG411D4D3	0	0	4	6	1.9909858702087517	2.37324818251162	2.298237988842262	2.6334782929834764	0	5	3.085979493363823	ENOG411D4D3	Xelaev18045439m.g	Xenbase_9.1	loc100492104.L	C16orf71	NA	C16orf71	C16orf71	Nucleoside diphosphate kinase	0.0010144140691652319	0.031228544508985365	TRUE	TRUE	FALSE
ENOG411D0XC	0	0	1	12	0.9954389325039961	3.356472987515909	0.9763098939548995	3.5265630890669644	0	6.5	3.0772664297726426	ENOG411D0XC	114306822, 11493740, Xelaev18007393m.g	GenBank, Xenbase_9.1	pole.L	DNA polymerase epsilon catalytic subunit [Xenopus laevis], DNA polymerase epsilon [Xenopus laevis], NA	Q07864	POLE	POLE1	polymerase (DNA directed), epsilon, catalytic subunit	0.0010445424328930785	0.031754089959949584	TRUE	TRUE	FALSE
ENOG411CQ1R	2	2	7	13	1.646950080681115	2.6819889580108676	1.3913473932337432	2.0485157922623203	2	10	3.0610221496022754	ENOG411CQ1R	Xelaev18036987m.g	Xenbase_9.1	kif1bp.S	NA	Q96EK5	KIF1BP	KBP KIAA1279	kiaa1279	0.001102913879216065	0.032824573843115816	TRUE	TRUE	FALSE
ENOG411DF1I	7	27	24	42	3.0177051942350546	1.309587574949871	1.6201660837296243	0.44503320357036613	17	33	3.059858061270174	ENOG411DF1I	161169050, Xelaev18021771m.g, Xelaev18024574m.g	GenBank, Xenbase_9.1	eif4g2.L, eif4g2.S	eIF4G-related protein NAT1 [Xenopus laevis], NA	NA	NA	NA	Eukaryotic translation initiation factor 4 gamma	0.0011072095539120081	0.032824573843115816	TRUE	TRUE	FALSE
ENOG411CPMA	9	12	20	29	2.0033788784400275	2.3189532001302053	1.0466992218462976	1.0325742483932987	10.5	24.5	3.0563503232971563	ENOG411CPMA	Xelaev18026243m.g	Xenbase_9.1	iars2.L	NA	Q9NSE4	IARS2	NA	Isoleucyl-tRNA synthetase 2, mitochondrial	0.0011202465579681796	0.032824573843115816	TRUE	TRUE	FALSE
ENOG411CPVM	0	0	3	7	1.7242131620693701	2.563425608021629	1.9763098939548995	2.826123370925872	0	5	3.031818449609694	ENOG411CPVM	Xelaev18033349m.g	Xenbase_9.1	elp2.S	NA	Q6IA86	ELP2	STATIP1	elongator acetyltransferase complex subunit 2	0.001215426800055058	0.034831921092559316	TRUE	TRUE	FALSE
ENOG411CUMF	3	9	9	26	1.708443550851191	2.5785031698840983	1.298237988842262	1.2590827782019787	6	17.5	3.031329096817356	ENOG411CUMF	147901482, Xelaev18034296m.g	GenBank, Xenbase_9.1	mcmbp.L	mini-chromosome maintenance complex-binding protein [Xenopus laevis], NA	Q9BTE3	MCMBP	C10orf119	Minichromosome maintenance complex binding protein	0.001217398557922509	0.034831921092559316	TRUE	TRUE	FALSE
ENOG411CX19	0	10	5	23	2.2260301295434397	1.957014272242631	2.561272394676056	0.9516542530097313	5	14	2.9578590625073558	ENOG411CX19	117558145	GenBank	NA	LOC100036801 protein [Xenopus laevis]	Q9HCS7	XAB2	HCNP KIAA1177 SYF1	XPA binding protein 2	0.001548918630886723	0.04380197802693617	TRUE	TRUE	FALSE
ENOG411CUA1	0	0	2	8	1.407788694550312	2.7404435391028095	1.561272394676056	2.9960483723681848	0	5	2.933243142352741	ENOG411CUA1	148223555, 148237570, Xelaev18047095m.g, Xelaev18044576m.g, Xelaev18030811m.g, Xelaev18032925m.g	GenBank, Xenbase_9.1	stam2.S, stam2.L, stam.L, stam.S	signal transducing adaptor molecule (SH3 domain and ITAM motif) 1 [Xenopus laevis], signal transducing adaptor molecule (SH3 domain and ITAM motif) 2 [Xenopus laevis], NA	O75886, Q92783	STAM2, STAM	HBP, STAM1	signal transducing adaptor molecule (SH3 domain and ITAM motif)	0.0016772054184685501	0.046884638824316253	TRUE	TRUE	FALSE
ENOG411CPDR	80	143	109	202	1.9987982178744295	2.0401959766160953	0.41781960459493445	0.3215342866687363	111.5	155.5	2.856000184097347	ENOG411CPDR	125858814, 147898991, 147901600, 147902846, Xelaev18039676m.g, Xelaev18022349m.g, Xelaev18041207m.g, Xelaev18024161m.g	GenBank, Xenbase_9.1	pygl.L, loc100491051-like.L, pygl.S, loc100491051-like.S	LOC100037229 protein [Xenopus laevis], uncharacterized protein LOC432134 [Xenopus laevis], liver glycogen phosphorylase [Xenopus laevis], brain glycogen phosphorylase [Xenopus laevis], NA	P11216, P11217, P06737	PYGB, PYGM, PYGL	NA	Phosphorylase is an important allosteric enzyme in carbohydrate metabolism. Enzymes from different sources differ in their regulatory mechanisms and in their natural substrates. However, all known phosphorylases share catalytic and structural properties (By similarity)	0.0021450744270804056	0.05928205689385848	TRUE	FALSE	FALSE
ENOG411D0MN	0	4	5	12	2.2260301295434397	1.802312935000598	2.561272394676056	1.204634994179602	2	8.5	2.8484686978848868	ENOG411D0MN	Xelaev18013779m.g, Xelaev18016226m.g	Xenbase_9.1	mipep.L, mipep.S	NA	Q99797	MIPEP	MIP	Mitochondrial intermediate peptidase	0.002196508731495541	0.060021452078619725	TRUE	FALSE	FALSE
ENOG411CS1T	7	16	16	34	1.8417572766492405	2.16041587894941	1.0637727352052393	0.8679435466204994	11.5	25	2.829963777806569	ENOG411CS1T	147898604, 148237107, Xelaev18044813m.g	GenBank, Xenbase_9.1	ndufa10.L	NADH dehydrogenase (ubiquinone) 1 alpha subcomplex, 10, 42kDa [Xenopus laevis], NA	O95299	NDUFA10	NA	NADH dehydrogenase ubiquinone 1 alpha subcomplex 10	0.0023276637163867912	0.06239814554699833	TRUE	FALSE	FALSE
ENOG411D476	0	1	2	10	1.407788694550312	2.588376427770156	1.561272394676056	2.2855549895631695	0.5	6	2.8257154567339717	ENOG411D476	148230603, 148237592, 285395349, Xelaev18012185m.g	GenBank, Xenbase_9.1	dynll2.L	dynein, light chain, LC8-type 1 [Xenopus laevis], dynein, light chain, LC8-type 2 [Xenopus laevis], NA	Q96FJ2, P63167	DYNLL2, DYNLL1	DLC2, DLC1 DNCL1 DNCLC1 HDLC1	dynein light chain LC8-type	0.0023587574845959185	0.06239814554699833	TRUE	FALSE	FALSE
ENOG411CWS7	43	66	53	118	0.9362550048795405	3.0595839629410073	0.2717657774810709	0.6548519437760434	54.5	85.5	2.825484830675364	ENOG411CWS7	120577581, 147904655, 148227920, 27769226, 28277344, Xelaev18008749m.g, Xelaev18004907m.g	GenBank, Xenbase_9.1	cct7.S, cct7.L	Unknown (protein for IMAGE:8331814) [Xenopus laevis], uncharacterized protein LOC495278 [Xenopus laevis], chaperonin containing TCP1, subunit 7 [Xenopus laevis], LOC495278 protein [Xenopus laevis], Cct7-prov protein [Xenopus laevis], NA	Q99832	CCT7	CCTH NIP7-1	Chaperonin containing TCP1, subunit 7 (Eta)	0.0023604561637844764	0.06239814554699833	TRUE	FALSE	FALSE
ENOG411DFA5	1	3	4	15	1.3273307913105068	2.6448054125816522	1.298237988842262	1.8261233709258722	2	9.5	2.8087244455687363	ENOG411DFA5	Xelaev18044348m.g, Xelaev18046916m.g	Xenbase_9.1	snx4.L, snx4.S	NA	NA	NA	NA	Sorting nexin 4	0.002486909926439278	0.06458438612872645	TRUE	FALSE	FALSE
ENOG411CPTN	3	10	12	21	2.2994202450496406	1.6710048567217057	1.6767496120959917	0.8261233709258724	6.5	16.5	2.807514513655807	ENOG411CPTN	1079288, 57870611, Xelaev18026122m.g	GenBank, Xenbase_9.1	msh2.L	DNA mismatch repair protein MSH2 - African clawed frog, MSH2 protein [Xenopus laevis], NA	P43246	MSH2	NA	mutS homolog 2, colon cancer, nonpolyposis type 1 (E. coli)	0.00249627150333071	0.06458438612872645	TRUE	FALSE	FALSE
ENOG411CSY2	0	2	4	9	1.9909858702087517	1.9632054655522715	2.298237988842262	1.5630889650920785	1	6.5	2.7960355076257115	ENOG411CSY2	147903417	GenBank	NA	tRNA-dihydrouridine synthase 3-like [Xenopus laevis]	Q96G46, K7EMI3	DUS3L, NA	NA	Dihydrouridine synthase 3-like (S. cerevisiae)	0.0025866858134683743	0.06621915682479039	TRUE	FALSE	FALSE
ENOG411CTG2	0	7	4	18	1.9909858702087517	1.9420253481583774	2.298237988842262	1.074050884369458	3.5	11	2.781058902990162	ENOG411CTG2	147900740, Xelaev18041175m.g, Xelaev18039718m.g	GenBank, Xenbase_9.1	eif5.S, eif5.L	eukaryotic translation initiation factor 5 [Xenopus laevis], NA	P55010	EIF5	NA	Eukaryotic translation initiation factor 5	0.002709095267462072	0.06842384183711638	TRUE	FALSE	FALSE
ENOG411CVKP	65	97	86	148	1.6075124446415436	2.321802248966502	0.3748592704451745	0.4305820472728256	81	117	2.77844506526619	ENOG411CVKP	117167955, 148237440, Xelaev18000429m.g, Xelaev18003848m.g	GenBank, Xenbase_9.1	Xelaev18000429m.g, cct5.S	LOC100036778 protein [Xenopus laevis], chaperonin containing TCP1, subunit 5 (epsilon) [Xenopus laevis], NA	P48643	CCT5	CCTE KIAA0098	chaperonin containing TCP1, subunit 5 (epsilon)	0.002730987407014273	0.06842384183711638	TRUE	FALSE	FALSE
ENOG411CRUV	0	2	2	12	1.407788694550312	2.5171331941984456	1.561272394676056	1.9416005883458083	1	7	2.7753388831617585	ENOG411CRUV	112491337, 125858782, 147902176, 158428921, 2554749, 2851464, 3319098, Xelaev18013758m.g, Xelaev18016209m.g	GenBank, Xenbase_9.1	gtf3a.L, gtf3a.S	Chain A, Transcription Factor Iiia Zinc Fingers 4-6 Bound To 5s Rrna 55mer (Nmr Structure), Gtf3a protein [Xenopus laevis], transcription factor IIIA [Xenopus laevis], Chain A, Invariance Of The Zinc Finger Module: A Comparison Of The Free Structure With Those In Nucleic-Acid Complexes, Chain A, Tfiiia Finger 1-3 Bound To Dna, Nmr, 22 Structures, RecName: Full=Transcription factor IIIA; Short=TFI…	Q92664	GTF3A	NA	general transcription factor IIIA	0.002757210731923275	0.06842384183711638	TRUE	FALSE	FALSE
ENOG411CV1V	1	0	3	9	0.9862276347740007	2.9067072035753396	0.9763098939548995	3.148051465813235	0.5	6	2.7527206229141745	ENOG411CV1V	Xelaev18019903m.g	Xenbase_9.1	polr3b.S	NA	Q9NW08	POLR3B	NA	polymerase (RNA) III (DNA directed) polypeptide B	0.0029551154298804953	0.07203622396850798	TRUE	FALSE	FALSE
ENOG411CT4Q	20	39	30	72	1.3565560862536097	2.535298694509162	0.5381887815630145	0.694019834918527	29.5	51	2.7519569068706398	ENOG411CT4Q	66912037, Xelaev18021503m.g	GenBank, Xenbase_9.1	rars.S	LOC733251 protein [Xenopus laevis], NA	P54136	RARS	NA	Arginyl-tRNA synthetase	0.002962015788178782	0.07203622396850798	TRUE	FALSE	FALSE
ENOG411CW7P	11	19	22	37	1.8717222917157728	1.9871280963173037	0.9149093492907562	0.7521227894820957	15	29.5	2.728619276962528	ENOG411CW7P	109940098, 1469526, 148226601, 2231177, 28278084	GenBank	NA	RecName: Full=DNA replication licensing factor mcm7-A; AltName: Full=CDC47 homolog A; AltName: Full=CDC47p; AltName: Full=Minichromosome maintenance protein 7-A; Short=xMCM7-A; AltName: Full=p90, XMCM7 [Xenopus laevis], DNA replication licensing factor mcm7-B [Xenopus laevis], CDC47p [Xenopus laevis], Mcm7-prov protein [Xenopus laevis]	P33993	MCM7	CDC47 MCM2	minichromosome maintenance complex component 7	0.003180004245952246	0.07657198342728577	TRUE	FALSE	FALSE
ENOG411CUXP	1	1	5	8	1.6181265945922993	2.215567962696751	1.561272394676056	1.9960483723681846	1	6.5	2.710831418457046	ENOG411CUXP	124481730	GenBank	NA	LOC100037138 protein [Xenopus laevis]	P57740	NUP107	NA	Nucleoporin 107kDa	0.0033557369673278105	0.08001129710334544	TRUE	FALSE	FALSE
ENOG411CPGE	0	4	4	12	1.9909858702087517	1.802312935000598	2.298237988842262	1.204634994179602	2	8	2.68226730823036	ENOG411CPGE	115528351, 351542215, 37748547, Xelaev18041032m.g, Xelaev18039964m.g	GenBank, Xenbase_9.1	exd2.S, exd2.L	LOC100158397 protein [Xenopus laevis], exonuclease 3'-5' domain containing 2 [Xenopus laevis], MGC68561 protein [Xenopus laevis], NA	Q9NVH0	EXD2	C14orf114 EXDL2	Exonuclease 3'-5' domain containing 2	0.003656250184929064	0.08633010145385907	TRUE	FALSE	FALSE
ENOG411CWNW	0	0	2	6	1.407788694550312	2.37324818251162	1.561272394676056	2.6334782929834764	0	4	2.6735968156868983	ENOG411CWNW	Xelaev18047744m.g, Xelaev18045497m.g	Xenbase_9.1	tsc2.S, tsc2.L	NA	P49815	TSC2	TSC4	Tuberous sclerosis 2	0.0037521305878266756	0.08774213066917765	TRUE	FALSE	FALSE
ENOG411CUPZ	14	18	20	43	0.9803941972167224	2.7902312815129986	0.46173672112514147	1.037627476119584	16	31.5	2.6662348453245577	ENOG411CUPZ	148224016, Xelaev18008065m.g	GenBank, Xenbase_9.1	ttc37.L	tetratricopeptide repeat protein 37 [Xenopus laevis], NA	Q6PGP7	TTC37	KIAA0372	Tetratricopeptide repeat domain 37	0.0038353044318450106	0.08883295598330539	TRUE	FALSE	FALSE
ENOG411CR61	9	11	16	28	1.3608519240261499	2.3993462151807248	0.7418446403178767	1.0991418653322884	10	22	2.6588616028382184	ENOG411CR61	148231213, Xelaev18008414m.g, Xelaev18011061m.g	GenBank, Xenbase_9.1	nars.L, nars.S	asparaginyl-tRNA synthetase [Xenopus laevis], NA	O43776	NARS	NA	Asparaginyl-tRNA synthetase	0.003920258147200796	0.08994403598105977	TRUE	FALSE	FALSE
ENOG411DG9T	22	31	44	45	2.648597777120956	1.0744291696197341	0.9446010342275615	0.34968532698288535	26.5	44.5	2.632577600580589	ENOG411DG9T	126631290, 1311667, 141795861, 147902700, 148236917, 157831120, 161611711, 28839627, 50416449, 83405227, Xelaev18004555m.g, Xelaev18001532m.g, Xelaev18028159m.g, Xelaev18004556m.g, Xelaev18030159m.g	GenBank, Xenbase_9.1	Xelaev18004555m.g, Xelaev18001532m.g, loc101731153.L, loc100487577-like.1.S, loc101731153.S	Xnf7 protein [Xenopus laevis], nuclear factor 7 [Xenopus laevis], Unknown (protein for IMAGE:8527468) [Xenopus laevis], nuclear factor 7, brain [Xenopus laevis], tripartite motif containing 62 [Xenopus laevis], Chain A, Xnf7 Bbox, Developmental Protein, Ph 7.5, 30 C, With Zinc, Nmr, 1 Structure, MGC52568 protein [Xenopus laevis], Rnf36 protein [Xenopus laevis], Unknown (protein for IMAGE:4202738)…	NA	NA	NA	tripartite motif containing 69	0.004236983122090993	0.09630227058808687	TRUE	FALSE	FALSE
ENOG411CRVH	1	0	4	6	1.3273307913105068	2.37324818251162	1.298237988842262	2.6334782929834764	0.5	5	2.6167044867059808	ENOG411CRVH	147904164, 148224447, 28386066	GenBank	NA	uncharacterized protein LOC398565 [Xenopus laevis], uncharacterized protein LOC495035 [Xenopus laevis], LOC398565 protein [Xenopus laevis]	Q9NUQ8	ABCF3	NA	ATP-binding cassette, subfamily F (GCN20), member 3	0.004439158390738746	0.09996327042848732	TRUE	FALSE	FALSE
ENOG411CXQS	1	8	8	16	2.316849478799448	1.3609519075855054	2.146234895397212	0.7436612107338995	4.5	12	2.6005983001700863	ENOG411CXQS	147906148, 148238026, Xelaev18006638m.g, Xelaev18001143m.g, Xelaev18008623m.g	GenBank, Xenbase_9.1	ncln.L, ncln.S, loc101730472.L	nicalin [Xenopus laevis], MGC79091 protein [Xenopus laevis], NA	Q969V3	NCLN	NA	Nicalin homolog (Zebrafish)	0.0046530676489861655	0.10303658356434606	FALSE	FALSE	FALSE
ENOG411CT1X	2	5	7	15	1.646950080681115	2.015124469781402	1.3913473932337432	1.241160870204716	3.5	11	2.5894777478427233	ENOG411CT1X	147898562, 148226640, Xelaev18043691m.g	GenBank, Xenbase_9.1	nploc4.L	nuclear protein localization 4 homolog [Xenopus laevis], uncharacterized protein LOC494816 [Xenopus laevis], NA	Q8TAT6	NPLOC4	KIAA1499 NPL4	Nuclear protein localization 4 homolog (S. cerevisiae)	0.004806081749425189	0.10303658356434606	FALSE	FALSE	FALSE
ENOG411CVPX	0	0	3	4	1.7242131620693701	1.937711845609288	1.9763098939548995	2.148051465813235	0	3.5	2.589372005126179	ENOG411CVPX	148235132, 213623970, Xelaev18008120m.g, Xelaev18010857m.g, Xelaev18023174m.g, Xelaev18025278m.g	GenBank, Xenbase_9.1	zfyve16.L, zfyve16.S, zfyve9.L, zfyve9.S	zinc finger, FYVE domain containing 9 [Xenopus laevis], Smad anchor for receptor activation [Xenopus laevis], NA	Q7Z3T8, O95405	ZFYVE16, ZFYVE9	KIAA0305, MADHIP SARA SMADIP	Zinc finger, FYVE domain containing	0.004807558006403017	0.10303658356434606	FALSE	FALSE	FALSE
ENOG411DCH0	0	0	3	4	1.7242131620693701	1.937711845609288	1.9763098939548995	2.148051465813235	0	3.5	2.589372005126179	ENOG411DCH0	147903968, 148233354, 161611778, Xelaev18029500m.g, Xelaev18034135m.g, Xelaev18032547m.g	GenBank, Xenbase_9.1	lrrc1.S, scrib.S, scrib.L	uncharacterized protein LOC495083 [Xenopus laevis], leucine rich repeat containing 1 [Xenopus laevis], LOC100127343 protein [Xenopus laevis], NA	Q9BTT6	LRRC1	LANO	leucine rich repeat containing 1	0.004807558006403017	0.10303658356434606	FALSE	FALSE	FALSE
ENOG411CXWY	0	19	7	29	2.633969638914541	1.0269677714522376	2.9763098939548995	0.41108587164702864	9.5	18	2.5886736683698675	ENOG411CXWY	148224080, 148233772, Xelaev18033225m.g, Xelaev18000268m.g	GenBank, Xenbase_9.1	Xelaev18033225m.g, Xelaev18000268m.g	cullin 1 [Xenopus laevis], uncharacterized protein LOC734526 [Xenopus laevis], NA	Q13616	CUL1	NA	Cullin 1	0.004817317528203709	0.10303658356434606	FALSE	FALSE	FALSE
ENOG411CRFD	20	24	26	53	0.8266488898620208	2.833023955462441	0.33887997333960773	0.9371546833146163	22	39.5	2.5877794858531935	ENOG411CRFD	111598535, 147899436, 147907116, 148230593, 1708482, 1708484, Xelaev18045061m.g	GenBank, Xenbase_9.1	kpna7.L	LOC398027 protein [Xenopus laevis], karyopherin alpha 2 (RAG cohort 1, importin alpha 1) [Xenopus laevis], importin subunit alpha-1 [Xenopus laevis], karyopherin alpha-2 subunit like [Xenopus laevis], RecName: Full=Importin subunit alpha-1; AltName: Full=Karyopherin subunit alpha-1, RecName: Full=Importin subunit alpha-2; AltName: Full=Karyopherin subunit alpha-2, NA	P52292, A9QM74	KPNA2, KPNA7	RCH1 SRP1, NA	Karyopherin alpha 2 (RAG cohort 1, importin alpha 1)	0.004829839854578722	0.10303658356434606	FALSE	FALSE	FALSE
ENOG411CZJS	0	0	2	5	1.407788694550312	2.1664484883645816	1.561272394676056	2.4110858716470287	0	3.5	2.5273673496082236	ENOG411CZJS	Xelaev18012356m.g	Xenbase_9.1	ddx20.L	NA	Q9UHI6	DDX20	DP103 GEMIN3	DEAD (Asp-Glu-Ala-Asp) box polypeptide 20	0.005746061396842034	0.1215167071053898	FALSE	FALSE	FALSE
ENOG411CRP2	15	31	30	48	2.186175704840389	1.3811115220609573	0.9305062043417749	0.4408332150410806	23	39	2.522452988582096	ENOG411CRP2	125858818, 148224478, 148233454, 148236307, 148237986, 153792559, 160333793, 1841845, 49255965, 56388563, Xelaev18005061m.g, Xelaev18040188m.g, Xelaev18002165m.g, Xelaev18044721m.g, Xelaev18005060m.g, Xelaev18034758m.g, Xelaev18044723m.g, Xelaev18037024m.g	GenBank, Xenbase_9.1	Xelaev18005061m.g, loc100485391-like.L, loc100485391-like.1, Xelaev18044721m.g, loc100145536.L, itln1.L, Xelaev18044723m.g, loc100127565.S	LOC398308 protein [Xenopus laevis], 35 kDa serum lectin precursor [Xenopus laevis], intelectin 2 [Xenopus laevis], intelectin 1 (galactofuranose binding) precursor [Xenopus laevis], lectin type 2 precursor [Xenopus laevis], uncharacterized protein LOC100101274 precursor [Xenopus laevis], egg cortical granule lectin precursor [Xenopus laevis], lectin [Xenopus laevis], Unknown (protein for MGC:7992…	Q8WWU7, Q8WWA0	ITLN2, ITLN1	NA, INTL ITLN LFR	Intelectin 1 (Galactofuranose binding)	0.005826976315365841	0.12216557240491142	FALSE	FALSE	FALSE
ENOG411CUPX	0	0	1	7	0.9954389325039961	2.563425608021629	0.9763098939548995	2.826123370925872	0	4	2.516497249930016	ENOG411CUPX	148225212, 49522202	GenBank	NA	N-terminal kinase-like protein [Xenopus laevis], LOC443710 protein [Xenopus laevis]	Q96KG9	SCYL1	CVAK90 GKLP NTKL TAPK TEIF TRAP	SCY1-like 1 (S. cerevisiae)	0.005926391259452001	0.1231878935298057	FALSE	FALSE	FALSE
ENOG411CP76	4	8	8	23	1.1282621718377197	2.415955753005199	0.8243068005098495	1.2411608702047163	6	15.5	2.506140528659341	ENOG411CP76	125693, 125694, 147906429, Xelaev18042263m.g, Xelaev18029088m.g, Xelaev18038924m.g, Xelaev18015064m.g	GenBank, Xenbase_9.1	rps6ka6.S, rps6ka2.S, rps6ka6.L, rps6ka1.S	RecName: Full=Ribosomal protein S6 kinase 2 alpha; AltName: Full=MAP kinase-activated protein kinase 1; Short=MAPK-activated protein kinase 1; Short=MAPKAP kinase 1; Short=MAPKAPK-1; AltName: Full=Ribosomal protein S6 kinase II alpha; Short=S6KII-alpha; AltName: Full=p90-RSK, RecName: Full=Ribosomal protein S6 kinase 2 beta; AltName: Full=Ribosomal protein S6 kinase II beta; Short=S6KII-beta; Alt…	Q15418, Q15349, Q9UK32	RPS6KA1, RPS6KA2, RPS6KA6	MAPKAPK1A RSK1, MAPKAPK1C RSK3, RSK4	Ribosomal protein S6 kinase, 90kDa, polypeptide	0.006102854906201855	0.12578087399900773	FALSE	FALSE	FALSE
ENOG411CPI8	4	8	6	27	0.6062312335962097	2.9290621942170008	0.46173672112514147	1.4635532915411642	6	16.5	2.499829956290955	ENOG411CPI8	147902798, 147902836, 148234020, Xelaev18037288m.g, Xelaev18027561m.g	GenBank, Xenbase_9.1	mfn2.S, mfn1.L	mitofusin 2 [Xenopus laevis], MGC80345 protein [Xenopus laevis], mitofusin 1 [Xenopus laevis], NA	O95140, Q8IWA4	MFN2, MFN1	CPRP1 KIAA0214, NA	mitofusin	0.0062126465366162415	0.12696770064748486	FALSE	FALSE	FALSE
ENOG411CZB5	0	1	3	6	1.7242131620693701	1.7797624090697997	1.9763098939548995	1.6334782929834764	0.5	4.5	2.4776848874645125	ENOG411CZB5	124481768, 147898636, Xelaev18006505m.g, Xelaev18001254m.g	GenBank, Xenbase_9.1	loc100486893.L, loc100486893.S	Unknown (protein for IMAGE:6927834) [Xenopus laevis], structural maintenance of chromosomes protein 2 [Xenopus laevis], NA	O95347	SMC2	CAPE SMC2L1	structural maintenance of chromosomes 2	0.006611893812267037	0.1322166933090419	FALSE	FALSE	FALSE
ENOG411CVJ8	0	1	3	6	1.7242131620693701	1.7797624090697997	1.9763098939548995	1.6334782929834764	0.5	4.5	2.4776848874645125	ENOG411CVJ8	147903437, 148226156, 52138889, Xelaev18037252m.g	GenBank, Xenbase_9.1	ssrp1.S	Ras association (RalGDS/AF-6) and pleckstrin homology domains 1 [Xenopus laevis], FACT complex subunit SSRP1 [Xenopus laevis], SSRP1 protein [Xenopus laevis], NA	Q08945	SSRP1	FACT80	Structure specific recognition protein 1	0.006611893812267037	0.1322166933090419	FALSE	FALSE	FALSE
ENOG411CUS7	6	14	16	25	2.0993771224306785	1.403021734312683	1.256417813147635	0.6196724934584459	10	20.5	2.4765699820232423	ENOG411CUS7	Xelaev18014744m.g, Xelaev18012398m.g	Xenbase_9.1	usp9x.S, usp9x.L	NA	Q93008, O00507	USP9X, USP9Y	DFFRX FAM USP9, DFFRY	ubiquitin specific peptidase 9, X-linked	0.006632580832114766	0.1322166933090419	FALSE	FALSE	FALSE
ENOG411CS3S	1	0	4	5	1.3273307913105068	2.1664484883645816	1.298237988842262	2.4110858716470287	0.5	4.5	2.470475020627306	ENOG411CS3S	148228726, Xelaev18045547m.g	GenBank, Xenbase_9.1	chtf18.L	chromosome transmission fidelity protein 18 homolog [Xenopus laevis], NA	Q8WVB6	CHTF18	C16orf41 CTF18	CTF18, chromosome transmission fidelity factor 18 homolog (S. cerevisiae)	0.006746687114428408	0.13339791107552756	FALSE	FALSE	FALSE
ENOG411CZXI	0	2	3	8	1.7242131620693701	1.7526107251628225	1.9763098939548995	1.4110858716470283	1	5.5	2.4584857476532553	ENOG411CZXI	147903207, 66911762, 77748265, Xelaev18003681m.g, Xelaev18008672m.g	GenBank, Xenbase_9.1	nop56.L, nop56.S	XNop56 protein [Xenopus laevis], NA	O00567	NOP56	NOL5A	NOP56 ribonucleoprotein homolog (yeast)	0.006976215724006551	0.13682384387728977	FALSE	FALSE	FALSE
ENOG411CR1F	20	34	32	57	1.606600914410915	1.8541891975481846	0.6283865905345926	0.5548213491084779	27	44.5	2.44714815642963	ENOG411CR1F	148222563, 148235681, Xelaev18025912m.g, Xelaev18024004m.g, Xelaev18020889m.g	GenBank, Xenbase_9.1	copg1.S, copg1.L, copg2.S	coatomer subunit gamma-2 [Xenopus laevis], coatomer protein complex, subunit gamma [Xenopus laevis], NA	Q9Y678, Q9UBF2	COPG1, COPG2	COPG, NA	The coatomer is a cytosolic protein complex that binds to dilysine motifs and reversibly associates with Golgi non- clathrin-coated vesicles, which further mediate biosynthetic protein transport from the ER, via the Golgi up to the trans Golgi network. Coatomer complex is required for budding from Golgi membranes, and is essential for the retrograde Golgi-to-ER transport of dilysine-tagged protei…	0.007199581789224612	0.14007338608838074	FALSE	FALSE	FALSE
ENOG411D0GZ	13	24	26	39	2.034997702056648	1.4217353129039279	0.923842474060764	0.50419527603851	18.5	32.5	2.444279355630042	ENOG411D0GZ	148223685, Xelaev18029939m.g, Xelaev18027896m.g	GenBank, Xenbase_9.1	copb2.S, copb2.L	coatomer protein complex, subunit beta 2 (beta prime) [Xenopus laevis], NA	P35606	COPB2	NA	coatomer protein complex, subunit beta 2 (beta prime)	0.007257091548986831	0.14007338608838074	FALSE	FALSE	FALSE
ENOG411CW4Q	5	7	12	17	1.6680180348340996	1.784247453339457	1.0917871113748356	0.9960483723681846	6	14.5	2.4411203371438086	ENOG411CW4Q	147900676, Xelaev18024681m.g	GenBank, Xenbase_9.1	edc4.S	enhancer of mRNA-decapping protein 4 [Xenopus laevis], NA	Q6P2E9	EDC4	HEDLS	Enhancer of mRNA decapping 4	0.007320887448348936	0.14019211239672924	FALSE	FALSE	FALSE
ENOG411CRFV	13	35	27	52	2.166939437089669	1.2579818161466323	0.9763098939548995	0.3841188240467594	24	39.5	2.4217850431933177	ENOG411CRFV	124481718, 147899434, 147900253, 148223545, 50415013, 54038415, Xelaev18015399m.g, Xelaev18002200m.g, Xelaev18003389m.g	GenBank, Xenbase_9.1	atp2a3.S, atp2a1.S, atp2a1.L	ATP2A2 protein [Xenopus laevis], ATPase, Ca++ transporting, cardiac muscle, slow twitch 2 [Xenopus laevis], ATPase, Ca++ transporting, ubiquitous [Xenopus laevis], uncharacterized protein LOC495046 [Xenopus laevis], LOC495046 protein [Xenopus laevis], NA	P16615, O14983, Q93084	ATP2A2, ATP2A1, ATP2A3	ATP2B, NA	ATPase CA transporting cardiac muscle	0.007722241634024854	0.14666522058110618	FALSE	FALSE	FALSE
ENOG411CY7I	13	27	25	44	1.8999731177174854	1.5211477743484227	0.8693946900383874	0.5106215451979428	20	34.5	2.4190977820387745	ENOG411CY7I	147898507, 147900293, Xelaev18009125m.g, Xelaev18005359m.g	GenBank, Xenbase_9.1	acsl1.S, acsl1.L	acyl-CoA synthetase long-chain family member 1 protein [Xenopus laevis], similar to fatty acid Coenzyme A ligase [Xenopus laevis], NA	P33121	ACSL1	FACL1 FACL2 LACS LACS1 LACS2	Acyl-CoA synthetase long-chain family member 1	0.007779528558784003	0.14666522058110618	FALSE	FALSE	FALSE
ENOG411CSDI	0	1	2	7	1.407788694550312	2.007386706589376	1.561272394676056	1.8261233709258722	0.5	4.5	2.414893685087361	ENOG411CSDI	114108185, Xelaev18024592m.g, Xelaev18021750m.g	GenBank, Xenbase_9.1	prmt3.S, prmt3.L	MGC154481 protein [Xenopus laevis], NA	O60678	PRMT3	HRMT1L3	Protein arginine methyltransferase 3	0.007869901566709256	0.1472276970018224	FALSE	FALSE	FALSE
ENOG411CRHE	0	0	3	3	1.7242131620693701	1.6780915843162603	1.9763098939548995	1.8261233709258722	0	3	2.405792757832456	ENOG411CRHE	13491131, Xelaev18002150m.g, Xelaev18029433m.g	GenBank, Xenbase_9.1	ttk.L, ttk.S	Mps1/TTK [Xenopus laevis], NA	P33981	TTK	MPS1 MPS1L1	ttk protein kinase	0.008068708153523474	0.14979464297228312	FALSE	FALSE	FALSE
ENOG411CQ6Z	1	3	5	10	1.6181265945922993	1.7683073289632851	1.561272394676056	1.2855549895631695	2	7.5	2.39457039138632	ENOG411CQ6Z	147904048, Xelaev18013592m.g	GenBank, Xenbase_9.1	aaas.L	Aladin [Xenopus laevis], NA	Q9NRG9	AAAS	ADRACALA	Achalasia, adrenocortical insufficiency, alacrimia	0.008319924554748327	0.15305963355050342	FALSE	FALSE	FALSE
ENOG411CQZV	1	2	5	8	1.6181265945922993	1.7526107251628225	1.561272394676056	1.4110858716470283	1.5	6.5	2.3834712163974148	ENOG411CQZV	148229908, Xelaev18016920m.g, Xelaev18020036m.g	GenBank, Xenbase_9.1	dctn4.L, dctn4.S	dynactin 4 (p62) [Xenopus laevis], NA	Q9UJW0	DCTN4	NA	Dynactin 4 (P62)	0.00857511279965744	0.15305963355050342	FALSE	FALSE	FALSE
ENOG411CW3G	4	5	7	18	0.8782196729638821	2.485339139250849	0.654381799067537	1.4890883836483018	4.5	12.5	2.3783952450368053	ENOG411CW3G	111185516, 349585432	GenBank	NA	Eif2b3 protein [Xenopus laevis], eukaryotic translation initiation factor 2B, subunit 3 gamma [Xenopus laevis]	Q9NR50	EIF2B3	NA	Eukaryotic translation initiation factor 2B, subunit 3 gamma, 58kDa	0.008694088365289954	0.15305963355050342	FALSE	FALSE	FALSE
ENOG411CS0Y	2	0	4	7	0.797715257795012	2.563425608021629	0.7132754881211057	2.826123370925872	1	5.5	2.3766854987421704	ENOG411CS0Y	12718857, 1333647, 1381671, 147906869, 148224335, 148226017, 148231259, 19338696, 19338700, 57921048, Xelaev18016154m.g, Xelaev18013701m.g, Xelaev18009255m.g, Xelaev18005523m.g	GenBank, Xenbase_9.1	smad9.S, smad9.L, smad1.S, smad1.L	Smad protein [Xenopus laevis], Mad1 [Xenopus laevis], mothers against DPP [Xenopus laevis], SMAD family member 1 [Xenopus laevis], SMAD family member 9 [Xenopus laevis], Smad8C protein [Xenopus laevis], Smad8A [Xenopus laevis], Smad8C [Xenopus laevis], MADH1 protein [Xenopus laevis], NA	Q99717, Q15797, O15198	SMAD5, SMAD1, SMAD9	MADH5, BSP1 MADH1 MADR1, MADH6 MADH9 SMAD8	SMAD family member	0.008734487695113233	0.15305963355050342	FALSE	FALSE	FALSE
ENOG411CQ5D	0	0	4	2	1.9909858702087517	1.3701428965181228	2.298237988842262	1.4110858716470287	0	3	2.3766769433937505	ENOG411CQ5D	Xelaev18025023m.g, Xelaev18022765m.g	Xenbase_9.1	phkb.S, phkb.L	NA	Q93100	PHKB	NA	phosphorylase kinase beta	0.008734690261276642	0.15305963355050342	FALSE	FALSE	FALSE
ENOG411CWBH	7	12	11	30	0.9082157742862715	2.440754546578964	0.5612723946760559	1.0798799631716554	9.5	20.5	2.368079623876296	ENOG411CWBH	126631432, 147905570, 67678082, Xelaev18042639m.g, Xelaev18040034m.g, Xelaev18026612m.g, Xelaev18028863m.g	GenBank, Xenbase_9.1	sec23a.S, sec23a.L, sec23b.L, sec23b.S	Unknown (protein for IMAGE:6939089) [Xenopus laevis], Sec23 homolog B [Xenopus laevis], LOC779038 protein [Xenopus laevis], NA	Q15436, Q15437	SEC23A, SEC23B	NA	S. cerevisiae	0.008940343637037622	0.15305963355050342	FALSE	FALSE	FALSE
ENOG411CUAU	0	0	2	4	1.407788694550312	1.937711845609288	1.561272394676056	2.148051465813235	0	3	2.365626118410111	ENOG411CUAU	62825970, Xelaev18015777m.g, Xelaev18013267m.g	GenBank, Xenbase_9.1	cog3.S, cog3.L	LOC779031 protein [Xenopus laevis], NA	Q96JB2	COG3	SEC34	Component of oligomeric Golgi complex 3	0.008999805755642265	0.15305963355050342	FALSE	FALSE	FALSE
ENOG411D0E2	0	0	2	4	1.407788694550312	1.937711845609288	1.561272394676056	2.148051465813235	0	3	2.365626118410111	ENOG411D0E2	Xelaev18030736m.g, Xelaev18032879m.g	Xenbase_9.1	svil.L, svil.S	NA	O95425	SVIL	NA	supervillin	0.008999805755642265	0.15305963355050342	FALSE	FALSE	FALSE
ENOG411CRQB	0	0	2	4	1.407788694550312	1.937711845609288	1.561272394676056	2.148051465813235	0	3	2.365626118410111	ENOG411CRQB	148229264, Xelaev18047424m.g	GenBank, Xenbase_9.1	zc3h15.S	zinc finger CCCH domain-containing protein 15 [Xenopus laevis], NA	Q8WU90	ZC3H15	DFRP1 LEREPO4	Zinc finger CCCH-type containing 15	0.008999805755642265	0.15305963355050342	FALSE	FALSE	FALSE
ENOG411CZP4	0	0	2	4	1.407788694550312	1.937711845609288	1.561272394676056	2.148051465813235	0	3	2.365626118410111	ENOG411CZP4	Xelaev18030865m.g	Xenbase_9.1	ccdc132-like.L	NA	Q96JG6	VPS50	CCDC132 KIAA1861	Coiled-coil domain containing 132	0.008999805755642265	0.15305963355050342	FALSE	FALSE	FALSE
ENOG411CY7Q	0	0	2	4	1.407788694550312	1.937711845609288	1.561272394676056	2.148051465813235	0	3	2.365626118410111	ENOG411CY7Q	120538277, Xelaev18013471m.g, Xelaev18015960m.g	GenBank, Xenbase_9.1	tsfm.L, tsfm.S	LOC100036913 protein [Xenopus laevis], NA	P43897	TSFM	NA	Associates with the EF-Tu.GDP complex and induces the exchange of GDP to GTP. It remains bound to the aminoacyl-tRNA.EF- Tu.GTP complex up to the GTP hydrolysis stage on the ribosome (By similarity)	0.008999805755642265	0.15305963355050342	FALSE	FALSE	FALSE
ENOG411CQBD	0	0	2	4	1.407788694550312	1.937711845609288	1.561272394676056	2.148051465813235	0	3	2.365626118410111	ENOG411CQBD	147904780	GenBank	NA	CWF19-like protein 1 [Xenopus laevis]	Q69YN2	CWF19L1	NA	CWF19-like 1, cell cycle control (S. pombe)	0.008999805755642265	0.15305963355050342	FALSE	FALSE	FALSE
ENOG411CPDK	158	370	241	402	4.018703753832925	-0.6951194861038461	0.5822901759451388	-0.054515977166963686	264	321.5	2.3501289735561577	ENOG411CPDK	125858664, 135463, 147898957, 147905746, 147906717, 148222316, 148224397, 148232028, 148232158, 157423153, 162287265, 51593543, Xelaev18042475m.g, Xelaev18031586m.g, Xelaev18046263m.g, Xelaev18024891m.g, Xelaev18019127m.g	GenBank, Xenbase_9.1	tubb.S, tubb2b.L, loc100498230.S, tubb3.S, tubb4a.L	LOC100037222 protein [Xenopus laevis], RecName: Full=Tubulin beta-2 chain; AltName: Full=Beta-2-tubulin, uncharacterized protein LOC446922 [Xenopus laevis], tubulin beta-4 chain [Xenopus laevis], uncharacterized protein LOC379566 [Xenopus laevis], uncharacterized protein LOC379202 [Xenopus laevis], tubulin, beta 4 [Xenopus laevis], tubulin, beta 6 [Xenopus laevis], tubulin beta chain [Xenopus lae…	Q13509, Q9BUF5, P68371, Q9BVA1, P07437, Q13885, P04350	TUBB3, TUBB6, TUBB4B, TUBB2B, TUBB, TUBB2A, TUBB4A	TUBB4, NA, TUBB2C, TUBB5, TUBB2, TUBB4 TUBB5	Tubulin is the major constituent of microtubules. It binds two moles of GTP, one at an exchangeable site on the beta chain and one at a non-exchangeable site on the alpha chain (By similarity)	0.009383453544189495	0.15847610430186704	FALSE	FALSE	FALSE
ENOG411CPCE	6	8	8	26	0.5024891657640495	2.8055906975133453	0.33887997333960773	1.411085871647029	7	17	2.339165704030113	ENOG411CPCE	148231986, 68534328, Xelaev18020297m.g, Xelaev18000630m.g, Xelaev18034981m.g	GenBank, Xenbase_9.1	mat2a.S, mat1a.S, mat1a.L	methionine adenosyltransferase II, alpha [Xenopus laevis], M(2)21ab-prov protein [Xenopus laevis], NA	P31153, Q00266	MAT2A, MAT1A	AMS2 MATA2, AMS1 MATA1	Catalyzes the formation of S-adenosylmethionine from methionine and ATP (By similarity)	0.00966342964587352	0.1616706196388407	FALSE	FALSE	FALSE
ENOG411CWIC	1	0	2	8	0.5640392668774026	2.7404435391028095	0.5612723946760559	2.9960483723681848	0.5	5	2.3366222004229584	ENOG411CWIC	Xelaev18015397m.g, Xelaev18012807m.g	Xenbase_9.1	ankfy1.S, ankfy1.L	NA	Q9P2R3	ANKFY1	ANKHZN KIAA1255	ankyrin repeat and FYVE domain containing 1	0.009729418535383305	0.1616706196388407	FALSE	FALSE	FALSE
ENOG411CSWI	4	14	8	31	1.1282621718377197	2.1731295393287877	0.8243068005098495	0.9192327753173537	9	19.5	2.3344364663188975	ENOG411CSWI	124481854	GenBank	NA	LOC100037132 protein [Xenopus laevis]	Q5VYK3	ECPAS	ECM29 KIAA0368	kiaa0368	0.009786439599503033	0.1616706196388407	FALSE	FALSE	FALSE
ENOG411CTR8	1	4	7	9	2.1053601558786528	1.1932226486344832	1.9763098939548995	0.8261233709258724	2.5	8	2.332450269376578	ENOG411CTR8	122831054, 169642016, Xelaev18034197m.g, Xelaev18036601m.g	GenBank, Xenbase_9.1	zyx.L, zyx.S	zyxin [Xenopus laevis], LOC100158313 protein [Xenopus laevis], NA	Q15942	ZYX	NA	Adhesion plaque protein. Binds alpha-actinin and the CRP protein. Important for targeting TES and ENA VASP family members to focal adhesions and for the formation of actin-rich structures. May be a component of a signal transduction pathway that mediates adhesion-stimulated changes in gene expression (By similarity)	0.009838508103021556	0.1616706196388407	FALSE	FALSE	FALSE
ENOG411CUMH	30	49	43	77	1.4514241704046005	1.8269326531035424	0.4815452022053216	0.4676694000133961	39.5	60	2.3181483410517973	ENOG411CUMH	148231181, 148233734, 148237065, 2370591, 2370593, 28278797, Xelaev18027504m.g	GenBank, Xenbase_9.1	eif4a2.L	translation initiation factor eIF4A II [Xenopus laevis], eukaryotic translation initiation factor 4A1 [Xenopus laevis], eukaryotic translation initiation factor 4A2 [Xenopus laevis], translation initiation factor eIF4A I [Xenopus laevis], LOC444845 protein [Xenopus laevis], NA	Q14240, P60842	EIF4A2, EIF4A1	DDX2B EIF4F, DDX2A EIF4A	eukaryotic translation initiation factor	0.010220630226109114	0.1668226356368951	FALSE	FALSE	FALSE
ENOG411CPFQ	0	1	3	5	1.7242131620693701	1.5268033056798456	1.9763098939548995	1.4110858716470287	0.5	4	2.2988157900946073	ENOG411CPFQ	46329638, 50370187, Xelaev18025008m.g, Xelaev18022812m.g	GenBank, Xenbase_9.1	dmgdh.S, pdpr.L	LOC414703 protein [Xenopus laevis], LOC445844 protein [Xenopus laevis], NA	Q8NCN5	PDPR	KIAA1990	pyruvate dehydrogenase phosphatase regulatory subunit	0.010757700897192777	0.17326310319187307	FALSE	FALSE	FALSE
ENOG411CU34	0	1	3	5	1.7242131620693701	1.5268033056798456	1.9763098939548995	1.4110858716470287	0.5	4	2.2988157900946073	ENOG411CU34	148232602, 148234478, Xelaev18030046m.g	GenBank, Xenbase_9.1	trappc12.S	tetratricopeptide repeat domain 15 [Xenopus laevis], uncharacterized protein LOC414531 [Xenopus laevis], NA	Q8WVT3	TRAPPC12	TRAMM TTC15	trafficking protein particle complex 12	0.010757700897192777	0.17326310319187307	FALSE	FALSE	FALSE
ENOG411CQ39	4	11	9	24	1.3601638513086796	1.8773851212182942	0.9763098939548996	0.8850170599794408	7.5	16.5	2.2892928328973627	ENOG411CQ39	148228342, Xelaev18002032m.g, Xelaev18019805m.g, Xelaev18002475m.g	GenBank, Xenbase_9.1	Xelaev18002032m.g, Xelaev18019805m.g, Xelaev18002475m.g	nucleoporin 205kDa [Xenopus laevis], NA	Q92621	NUP205	C7orf14 KIAA0225	nucleoporin 205kDa	0.0110311719266818	0.1759382747710853	FALSE	FALSE	FALSE
ENOG411CVXK	3	14	11	23	2.1139782141102597	1.1217557899914459	1.561272394676056	0.50419527603851	8.5	17	2.2880094564162157	ENOG411CVXK	Xelaev18045865m.g, Xelaev18043090m.g	Xenbase_9.1	dnajc7.S, dnajc7.L	NA	Q99615	DNAJC7	TPR2 TTC2	DnaJ (Hsp40) homolog, subfamily C, member 7	0.011068485213805943	0.1759382747710853	FALSE	FALSE	FALSE
ENOG411D2E0	3	9	11	16	2.1139782141102597	1.1125309090704514	1.561272394676056	0.5916581172888493	6	13.5	2.2814864805613424	ENOG411D2E0	148225843, Xelaev18008662m.g, Xelaev18003711m.g	GenBank, Xenbase_9.1	loc448531.S, loc448531.1.L	uncharacterized protein LOC379587 [Xenopus laevis], NA	NA	NA	NA	programmed cell death	0.01125983790556254	0.1778176999112214	FALSE	FALSE	FALSE
ENOG411CPZP	22	49	34	75	1.5433143974663144	1.6673592896034202	0.5820309548428529	0.43019469459473325	35.5	54.5	2.2702891363042244	ENOG411CPZP	124481734, 148224874, 148232202, Xelaev18032852m.g, Xelaev18013512m.g, Xelaev18015986m.g	GenBank, Xenbase_9.1	pfkp.S, pfkm.L, pfkm.S	LOC100037146 protein [Xenopus laevis], phosphofructokinase, muscle [Xenopus laevis], uncharacterized protein LOC379632 [Xenopus laevis], NA	P08237, Q01813, P17858	PFKM, PFKP, PFKL	PFKX, PFKF, NA	Phosphofructokinase	0.01159502288366862	0.18170589161290063	FALSE	FALSE	FALSE
ENOG411CSCK	4	12	12	21	1.9728834436347125	1.23497659317958	1.3548215172086295	0.5851152714220775	8	16.5	2.2682995851287138	ENOG411CSCK	123898906, 62739333, Xelaev18005006m.g	GenBank, Xenbase_9.1	ptcd3.L	RecName: Full=Pentatricopeptide repeat-containing protein 3, mitochondrial; Flags: Precursor, Ptcd3 protein [Xenopus laevis], NA	Q96EY7	PTCD3	MRPS39	Pentatricopeptide repeat domain 3	0.011655476600169613	0.18170589161290063	FALSE	FALSE	FALSE
ENOG411CVID	4	3	7	13	0.8782196729638821	2.320702183423253	0.654381799067537	1.6334782929834764	3.5	10	2.261979337137202	ENOG411CVID	148224361	GenBank	NA	translocase of inner mitochondrial membrane 44 [Xenopus laevis]	O43615	TIMM44	MIMT44 TIM44	Translocase of inner mitochondrial membrane 44 homolog (Yeast)	0.011849339979069581	0.1835515594210014	FALSE	FALSE	FALSE
ENOG411CV4T	0	1	2	6	1.407788694550312	1.7797624090697997	1.561272394676056	1.6334782929834764	0.5	4	2.2539390007484443	ENOG411CV4T	1169421, 49257324	GenBank	NA	RecName: Full=Developmentally-regulated GTP-binding protein 1; Short=DRG-1; Short=xDRG, Xdrg protein [Xenopus laevis]	Q9Y295	DRG1	NEDD3	developmentally regulated GTP binding protein 1	0.012100002852510889	0.18624814517282584	FALSE	FALSE	FALSE
ENOG411CTF4	1	3	5	9	1.6181265945922993	1.5607888790588893	1.561272394676056	1.1480514658132348	2	7	2.247832688237601	ENOG411CTF4	148225927, 148229117, 28302315, 65253, Xelaev18045870m.g	GenBank, Xenbase_9.1	jup.S	junction plakoglobin [Xenopus laevis], LOC398496 protein [Xenopus laevis], X-plakoglobin [Xenopus laevis], NA	P14923	JUP	CTNNG DP3	Catenin (Cadherin-associated protein), beta 1, 88kDa	0.012293430319585697	0.18803536186938627	FALSE	FALSE	FALSE
ENOG411CQI7	2	0	4	6	0.797715257795012	2.37324818251162	0.7132754881211057	2.6334782929834764	1	5	2.242209751535443	ENOG411CQI7	147900632, Xelaev18042288m.g, Xelaev18038957m.g	GenBank, Xenbase_9.1	nsdhl.S, nsdhl.L	NAD(P) dependent steroid dehydrogenase-like [Xenopus laevis], NA	Q15738	NSDHL	H105E3	NAD(P) dependent steroid dehydrogenase-like	0.012473909603677183	0.18960342597589316	FALSE	FALSE	FALSE
ENOG411CTWR	2	3	6	10	1.394837396380582	1.7683073289632851	1.1987023152913476	1.2855549895631695	2.5	8	2.2366810851651078	ENOG411CTWR	147904663, Xelaev18018235m.g	GenBank, Xenbase_9.1	galk2.L	galactokinase 2 [Xenopus laevis], NA	Q01415	GALK2	GK2	Galactokinase 2	0.012653595551410034	0.19039705268688983	FALSE	FALSE	FALSE
ENOG411CXN4	0	0	1	5	0.9954389325039961	2.1664484883645816	0.9763098939548995	2.4110858716470287	0	3	2.235792036644614	ENOG411CXN4	124481902, 148223718, Xelaev18002461m.g, Xelaev18019794m.g	GenBank, Xenbase_9.1	agk.L, agk.S	MGC52920 protein [Xenopus laevis], acylglycerol kinase, mitochondrial precursor [Xenopus laevis], NA	Q53H12	AGK	MULK	acylglycerol kinase	0.012682698410886577	0.19039705268688983	FALSE	FALSE	FALSE
ENOG411DCD3	0	7	5	12	2.2260301295434397	0.8937108668989081	2.561272394676056	0.5265630890669644	3.5	8.5	2.205990014130061	ENOG411DCD3	148234217, Xelaev18021076m.g	GenBank, Xenbase_9.1	tes.S	testin [Xenopus laevis], NA	Q9UGI8	TES	NA	Testis derived transcript (3 LIM domains)	0.013692349450975595	0.2042932138943107	FALSE	FALSE	FALSE
ENOG411CRNS	55	71	62	117	0.551137363502985	2.5527217873264534	0.14623489539721182	0.5388414188454014	63	89.5	2.194759853399415	ENOG411CRNS	148225937, 148228482, Xelaev18011171m.g, Xelaev18008541m.g, Xelaev18008524m.g	GenBank, Xenbase_9.1	vwa5a-like.S, vwa5a-like.L, loc101734365.L	von Willebrand factor A domain containing 5A, gene 2 [Xenopus laevis], von Willebrand factor A domain containing 5A [Xenopus laevis], NA	O00534	VWA5A	BCSC1 LOH11CR2A	von Willebrand factor A domain containing 5A	0.014090414363808047	0.2069765238611084	FALSE	FALSE	FALSE
ENOG411CV48	13	18	20	35	1.1717312645212656	1.9280251761003242	0.5612723946760556	0.7481208589245991	15.5	27.5	2.191858799190202	ENOG411CV48	148235905, 27882650, 62122653, 62122655, Xelaev18040907m.g, Xelaev18042999m.g	GenBank, Xenbase_9.1	psmd4.L, psmd4.S	proteasome (prosome, macropain) 26S subunit, non-ATPase, 4 [Xenopus laevis], Xrpn10c protein [Xenopus laevis], 26S proteasome subunit [Xenopus laevis], NA	P55036	PSMD4	MCB1	Proteasome (Prosome, macropain) 26S subunit, non-ATPase, 4	0.014194851922986413	0.2069765238611084	FALSE	FALSE	FALSE
ENOG411CV5P	1	3	4	10	1.3273307913105068	1.7683073289632851	1.298237988842262	1.2855549895631695	2	7	2.1889467069451753	ENOG411CV5P	Xelaev18034669m.g, Xelaev18036957m.g	Xenbase_9.1	mgea5.L, mgea5.S	NA	O60502	OGA	HEXC KIAA0679 MEA5 MGEA5	Meningioma expressed antigen 5 (Hyaluronidase)	0.014300356863865101	0.2069765238611084	FALSE	FALSE	FALSE
ENOG411CXQT	0	0	3	2	1.7242131620693701	1.3701428965181228	1.9763098939548995	1.4110858716470287	0	2.5	2.188040152432894	ENOG411CXQT	148238249, Xelaev18005008m.g	GenBank, Xenbase_9.1	polr1a.L	polymerase (RNA) I polypeptide A, 194kDa [Xenopus laevis], NA	O95602	POLR1A	NA	polymerase (RNA) I polypeptide A	0.014333338832724798	0.2069765238611084	FALSE	FALSE	FALSE
ENOG411CU2K	12	19	17	39	0.8833989036667468	2.2071701601886766	0.44579517725611967	0.8261233709258724	15.5	28	2.18536234277753	ENOG411CU2K	Xelaev18016912m.g	Xenbase_9.1	gemin5.L	NA	Q8TEQ6	GEMIN5	NA	gem (nuclear organelle) associated protein 5	0.01443114482736934	0.2069765238611084	FALSE	FALSE	FALSE
ENOG411CVYM	0	0	2	3	1.407788694550312	1.6780915843162603	1.561272394676056	1.8261233709258722	0	2.5	2.182046871116387	ENOG411CVYM	147906372, Xelaev18020580m.g, Xelaev18018281m.g	GenBank, Xenbase_9.1	efl1.S, efl1.L	elongation factor Tu GTP binding domain containing 1 [Xenopus laevis], NA	Q7Z2Z2	EFL1	EFTUD1 FAM42A	elongation factor Tu GTP binding domain containing 1	0.014553036833984186	0.2069765238611084	FALSE	FALSE	FALSE
ENOG411CU21	0	0	2	3	1.407788694550312	1.6780915843162603	1.561272394676056	1.8261233709258722	0	2.5	2.182046871116387	ENOG411CU21	1000735, 148226891, 169642010, 773360, 773362, Xelaev18014462m.g, Xelaev18037733m.g, Xelaev18035964m.g	GenBank, Xenbase_9.1	gsk3b.S, gsk3a.S, gsk3a.L	glycogen synthase kinase 3 beta [Xenopus laevis], glycogen synthase kinase-3 beta [Xenopus laevis], Unknown (protein for IMAGE:8332721) [Xenopus laevis], glycogen synthase kinase 3 [Xenopus laevis], NA	P49841, P49840, M0QYV0	GSK3B, GSK3A, NA	NA	Glycogen synthase kinase 3	0.014553036833984186	0.2069765238611084	FALSE	FALSE	FALSE
ENOG411D009	0	0	2	3	1.407788694550312	1.6780915843162603	1.561272394676056	1.8261233709258722	0	2.5	2.182046871116387	ENOG411D009	1177822, 148238191, Xelaev18047345m.g	GenBank, Xenbase_9.1	orc2.S	XORC2 [Xenopus laevis], origin recognition complex subunit 2 [Xenopus laevis], NA	Q13416	ORC2	ORC2L	Origin recognition complex, subunit 2	0.014553036833984186	0.2069765238611084	FALSE	FALSE	FALSE
ENOG411CSYG	1	3	2	14	0.5640392668774026	2.48644481230657	0.5612723946760559	1.7330139665343909	2	8	2.157017978292588	ENOG411CSYG	148921625, Xelaev18047536m.g, Xelaev18045214m.g	GenBank, Xenbase_9.1	c16orf62.S, c16orf62.L	LOC100101331 protein [Xenopus laevis], NA	Q7Z3J2	VPS35L	C16orf62	Chromosome 16 open reading frame 62	0.015502131831539041	0.218319884834289	FALSE	FALSE	FALSE
ENOG411CQBB	17	31	25	53	1.1810663751925725	1.868401146206419	0.5068246106536793	0.581010873089341	24	39	2.15629916338936	ENOG411CQBB	110556599, 118597351, 120537970, 125070, 125072, 125858800, 13111398, 147900350, 147904400, 148222122, 148222537, 148233882, 148238014, 213623717, 214568, 313747275, 33416650, 388544, 49257688, 65245, 671668, 833626, Xelaev18045884m.g, Xelaev18045887m.g, Xelaev18043115m.g, Xelaev18043127m.g, Xelaev18043114m.g, Xelaev18043126m.g, Xelaev18043130m.g, Xelaev18043125m.g, Xelaev18043123m.g, Xelaev18045…	GenBank, Xenbase_9.1	loc100491563.S, loc101730713-like.S, loc100491563.L, Xelaev18043127m.g, krt35.L, loc100158585.L, krt24-like.1.L, Xelaev18043125m.g, Xelaev18043123m.g, krt35.S, krt14.L, loc100486967.S, krt24-like.1.S, Xetrov90024636m.S, Xetrov90024636m.1, loc100490729.S, loc100490729.L, loc100490379.L, krt.S, loc549413.S, krt15.L	keratin [Xenopus laevis], RecName: Full=Keratin, type I cytoskeletal 47 kDa, LOC100036883 protein [Xenopus laevis], LOC779065 protein [Xenopus laevis], adult keratin XAK-B [Xenopus laevis], keratin 16 (focal non-epidermolytic palmoplantar keratoderma) [Xenopus laevis], keratin, type I cytoskeletal 47 kDa [Xenopus laevis], uncharacterized protein LOC379143 [Xenopus laevis], keratin 13 [Xenopus lae…	P08727, Q2M2I5	KRT19, KRT24	NA, KA24	Keratin, type I cytoskeletal	0.015530156281386511	0.218319884834289	FALSE	FALSE	FALSE
ENOG411CUIH	4	5	9	13	1.3601638513086796	1.667302511206565	0.9763098939548996	1.04851579226232	4.5	11	2.1407419947486996	ENOG411CUIH	148232684, Xelaev18040783m.g	GenBank, Xenbase_9.1	ppox.L	protoporphyrinogen oxidase [Xenopus laevis], NA	P50336	PPOX	NA	protoporphyrinogen oxidase	0.016147424973394955	0.2256927444557272	FALSE	FALSE	FALSE
ENOG411CSH4	0	4	2	11	1.407788694550312	1.6112190058819011	1.561272394676056	1.089157776759666	2	6.5	2.1347608174300228	ENOG411CSH4	118764339, 163638968, 47938721, 62739288, 83405203, Xelaev18006024m.g, Xelaev18010073m.g	GenBank, Xenbase_9.1	uhrf1.L, uhrf2.S	Uhrf2 protein [Xenopus laevis], RING finger domain protein Np95 [Xenopus laevis], LOC432234 protein [Xenopus laevis], NA	Q96T88, Q96PU4	UHRF1, UHRF2	ICBP90 NP95 RNF106, NIRF RNF107	ubiquitin-like with PHD and ring finger domains	0.016390276184222476	0.22777800960016606	FALSE	FALSE	FALSE
ENOG411CWXR	2	1	4	8	0.797715257795012	2.215567962696751	0.7132754881211057	1.9960483723681846	1.5	6	2.130712998845364	ENOG411CWXR	Xelaev18042479m.g, Xelaev18039227m.g	Xenbase_9.1	gnl1.S, gnl1.L	NA	P36915	GNL1	HSR1	Guanine nucleotide binding protein-like 1	0.016556396766456642	0.2287793007728554	FALSE	FALSE	FALSE
ENOG411DFYG	7	12	13	24	1.3069671609046911	1.6670108693570673	0.7836648160125037	0.769539842559505	9.5	18.5	2.1029200322979005	ENOG411DFYG	148231147, Xelaev18017354m.g	GenBank, Xenbase_9.1	apaf1.L	apoptotic peptidase activating factor 1 [Xenopus laevis], NA	O14727	APAF1	KIAA0413	Apoptotic peptidase activating factor 1	0.017736380201519453	0.2436998680796345	FALSE	FALSE	FALSE
ENOG411CSRQ	18	36	32	51	1.9254065745873892	1.0355215541524525	0.7727764998697676	0.3171097234380146	27	41.5	2.093692358437937	ENOG411CSRQ	148231173, Xelaev18012175m.g, Xelaev18015003m.g	GenBank, Xenbase_9.1	ipo9.L, ipo9.S	importin 9 [Xenopus laevis], NA	Q96P70	IPO9	IMP9 KIAA1192 RANBP9	Importin 9	0.01814369704644494	0.24631839042842196	FALSE	FALSE	FALSE
ENOG411CR17	0	3	1	11	0.9954389325039961	1.962962412441017	0.9763098939548995	1.4110858716470287	1.5	6	2.0919056524820214	ENOG411CR17	147899678, 148232138, Xelaev18005003m.g, Xelaev18034486m.g, Xelaev18017351m.g, Xelaev18021330m.g, Xelaev18036811m.g, Xelaev18008842m.g	GenBank, Xenbase_9.1	kdm3a.L, jmjd1c.L, kdm3b.L, kdm3b.S, jmjd1c.S, kdm3a.S	lysine-specific demethylase 3A-B [Xenopus laevis], lysine-specific demethylase 3A-A [Xenopus laevis], NA	Q15652, Q7LBC6, Q9Y4C1	JMJD1C, KDM3B, KDM3A	JHDM2C KIAA1380 TRIP8, C5orf7 JHDM2B JMJD1B KIAA1082, JHDM2A JMJD1 JMJD1A KIAA0742 TSGA	lysine (K)-specific demethylase	0.01822347817826441	0.24631839042842196	FALSE	FALSE	FALSE
ENOG411CZW4	18	29	25	51	1.012527080305538	1.944812525426137	0.42882209865240617	0.6196724934584459	23.5	38	2.091154889484418	ENOG411CZW4	148234853, 162287243, Xelaev18042362m.g, Xelaev18039061m.g	GenBank, Xenbase_9.1	Xelaev18042362m.g, Xelaev18039061m.g	echinoderm microtubule associated protein like 1 [Xenopus laevis], echinoderm microtubule associated protein like 2 [Xenopus laevis], NA	O95834	EML2	EMAP2 EMAPL2	Echinoderm microtubule associated protein like	0.018257090816303504	0.24631839042842196	FALSE	FALSE	FALSE
ENOG411CP84	34	59	47	87	1.3698385171468215	1.5851382266996863	0.43198937773108936	0.3786643939546511	46.5	67	2.089484093822409	ENOG411CP84	148227463, 148234082, Xelaev18003300m.g, Xelaev18016290m.g	GenBank, Xenbase_9.1	acat1.L, acat1.S	acetyl-CoA acetyltransferase A, mitochondrial precursor [Xenopus laevis], acetyl-CoA acetyltransferase B, mitochondrial precursor [Xenopus laevis], NA	P24752	ACAT1	ACAT MAT	acetyl-CoA acetyltransferase 1	0.018332084156062654	0.24631839042842196	FALSE	FALSE	FALSE
ENOG411CYKW	0	1	2	5	1.407788694550312	1.5268033056798456	1.561272394676056	1.4110858716470287	0.5	3.5	2.0750699033785387	ENOG411CYKW	Xelaev18042044m.g, Xelaev18042043m.g, Xelaev18038762m.g	Xenbase_9.1	Xelaev18042044m.g, abcb7.S, abcb7.L	NA	O75027	ABCB7	ABC7	ATP-binding cassette, sub-family B (MDR TAP), member 7	0.01899002830222351	0.24758665619253187	FALSE	FALSE	FALSE
ENOG411CT46	0	0	1	4	0.9954389325039961	1.937711845609288	0.9763098939548995	2.148051465813235	0	2.5	2.0740508054465017	ENOG411CT46	123916375, Xelaev18006306m.g, Xelaev18009836m.g	GenBank, Xenbase_9.1	rfx2.L, rfx2.S	RecName: Full=DNA-binding protein RFX2; AltName: Full=Regulatory factor X 2, NA	P48378	RFX2	NA	regulatory factor X, 2 (influences HLA class II expression)	0.019037296343751422	0.24758665619253187	FALSE	FALSE	FALSE
ENOG411CYMZ	0	0	1	4	0.9954389325039961	1.937711845609288	0.9763098939548995	2.148051465813235	0	2.5	2.0740508054465017	ENOG411CYMZ	148228823, 148230665, Xelaev18031966m.g, Xelaev18033684m.g	GenBank, Xenbase_9.1	trappc8.L, trappc8.S	uncharacterized protein LOC432274 [Xenopus laevis], trafficking protein particle complex 8 [Xenopus laevis], NA	Q9Y2L5	TRAPPC8	KIAA1012	Trafficking protein particle complex 8	0.019037296343751422	0.24758665619253187	FALSE	FALSE	FALSE
ENOG411CQ7X	0	0	1	4	0.9954389325039961	1.937711845609288	0.9763098939548995	2.148051465813235	0	2.5	2.0740508054465017	ENOG411CQ7X	120538078, 148233484	GenBank	NA	LOC100036945 protein [Xenopus laevis], DnaJ (Hsp40) homolog, subfamily B, member 11 [Xenopus laevis]	Q9UBS4, H7C2Y5	DNAJB11, NA	EDJ ERJ3 HDJ9, NA	DnaJ (Hsp40) homolog, subfamily B, member 11	0.019037296343751422	0.24758665619253187	FALSE	FALSE	FALSE
ENOG411CZ7R	0	0	1	4	0.9954389325039961	1.937711845609288	0.9763098939548995	2.148051465813235	0	2.5	2.0740508054465017	ENOG411CZ7R	12229611, 12229617, 147898695, Xelaev18036845m.g, Xelaev18021331m.g, Xelaev18017349m.g, Xelaev18005017m.g, Xelaev18034551m.g	GenBank, Xenbase_9.1	ctbp2-like.2.S, ctbp2-like.1.S, ctbp2-like.1.L, ctbp1.L, ctbp2-like.2.L	RecName: Full=C-terminal-binding protein 2; Short=CtBP2; AltName: Full=C-terminal-binding protein B; AltName: Full=TCF-3 corepressor CtBP; AltName: Full=XCtBP, RecName: Full=C-terminal-binding protein 1; Short=CtBP1; AltName: Full=C-terminal-binding protein A, uncharacterized protein LOC494997 [Xenopus laevis], NA	P56545, Q13363	CTBP2, CTBP1	NA, CTBP	C-terminal binding protein	0.019037296343751422	0.24758665619253187	FALSE	FALSE	FALSE
ENOG411CUX3	0	0	1	4	0.9954389325039961	1.937711845609288	0.9763098939548995	2.148051465813235	0	2.5	2.0740508054465017	ENOG411CUX3	147900604, Xelaev18037238m.g	GenBank, Xenbase_9.1	prpf19.S	PRP19/PSO4 pre-mRNA processing factor 19 homolog [Xenopus laevis], NA	Q9UMS4	PRPF19	NMP200 PRP19 SNEV	PRP19 PSO4 pre-mRNA processing factor 19 homolog (S. cerevisiae)	0.019037296343751422	0.24758665619253187	FALSE	FALSE	FALSE
ENOG411CQMF	10	11	14	26	0.7752715960686547	2.144633946900394	0.42376887092612064	0.9960483723681848	10.5	20	2.064685009857602	ENOG411CQMF	148230096, Xelaev18027226m.g, Xelaev18038642m.g	GenBank, Xenbase_9.1	Xelaev18027226m.g, Xelaev18038642m.g	O-linked N-acetylglucosamine (GlcNAc) transferase (UDP-N-acetylglucosamine:polypeptide-N-acetylglucosaminyl transferase) [Xenopus laevis], NA	O15294	OGT	NA	O-linked N-acetylglucosamine (GlcNAc) transferase	0.01947640691816247	0.250358130113512	FALSE	FALSE	FALSE
ENOG411CPUR	49	67	62	100	1.144377093087882	1.7737955052782235	0.3097336276800911	0.3968720124273278	58	81	2.06345963297744	ENOG411CPUR	148233826, Xelaev18012771m.g	GenBank, Xenbase_9.1	cct6a.L	chaperonin containing TCP1, subunit 6A (zeta 1) [Xenopus laevis], NA	P40227, Q92526	CCT6A, CCT6B	CCT6 CCTZ, NA	chaperonin containing Tcp1, subunit	0.019534489633999137	0.250358130113512	FALSE	FALSE	FALSE
ENOG411CW2E	0	4	3	9	1.7242131620693701	1.1932226486344832	1.9763098939548995	0.8261233709258724	2	6	2.0629386454251675	ENOG411CW2E	115529163, 148230330, Xelaev18043837m.g	GenBank, Xenbase_9.1	aarsd1.L	Aarsd1-a protein [Xenopus laevis], alanyl-tRNA synthetase domain containing 1 [Xenopus laevis], NA	Q9BTE6	AARSD1	NA	alanyl-tRNA synthetase domain containing 1	0.019559228915118125	0.250358130113512	FALSE	FALSE	FALSE
ENOG411CRWF	6	15	17	21	2.2609144702954924	0.6300333365151363	1.3388799733396077	0.28555498956316955	10.5	19	2.0442087982521726	ENOG411CRWF	148225198	GenBank	NA	phosphatidylinositide phosphatase SAC1 [Xenopus laevis]	Q9NTJ5	SACM1L	KIAA0851	SAC1 suppressor of actin mutations 1-like (yeast)	0.02046646219003889	0.26059914160300823	FALSE	FALSE	FALSE
ENOG411CQFS	3	6	9	12	1.708443550851191	1.178551060519021	1.298237988842262	0.7192081670093603	4.5	10.5	2.041413466948898	ENOG411CQFS	1582214, 349585162, 50416330, Xelaev18047501m.g	GenBank, Xenbase_9.1	gspt1.S	polypeptide chain releasing factor eRF3, eukaryotic peptide chain release factor GTP-binding subunit ERF3A [Xenopus laevis], Gspt2-prov protein [Xenopus laevis], NA	Q8IYD1, P15170	GSPT2, GSPT1	ERF3B, ERF3A	G1 to S phase transition	0.020604873498858825	0.2609950643188784	FALSE	FALSE	FALSE
ENOG411CWMH	23	72	33	104	1.2745285894001084	1.6036531396508735	0.4788102344840827	0.3505443297119775	47.5	68.5	2.0351818180991716	ENOG411CWMH	148234431, Xelaev18025750m.g, Xelaev18023766m.g	GenBank, Xenbase_9.1	iars.S, iars.L	isoleucyl-tRNA synthetase [Xenopus laevis], NA	P41252	IARS	NA	Isoleucyl-tRNA synthetase	0.02091629091024486	0.2635669403819456	FALSE	FALSE	FALSE
ENOG411CSFP	1	6	7	10	2.1053601558786528	0.7655344381552881	1.9763098939548995	0.4782000675055653	3.5	8.5	2.0300290355132	ENOG411CSFP	148223569, Xelaev18018424m.g, Xelaev18020446m.g	GenBank, Xenbase_9.1	clpx.L, clpx.S	ClpX caseinolytic peptidase X homolog [Xenopus laevis], NA	O76031	CLPX	NA	ClpX caseinolytic peptidase X homolog (E. coli)	0.021176793988099303	0.26547403597452324	FALSE	FALSE	FALSE
ENOG411CUH0	3	7	7	16	1.2417650990384717	1.6205480043941078	0.9763098939548995	0.9135862121762117	5	11.5	2.0239610053162886	ENOG411CUH0	118763688, 124481818, 148237982, 54311422, Xelaev18028620m.g, Xelaev18039316m.g	GenBank, Xenbase_9.1	adck3.S, adck4.L	LOC495397 protein [Xenopus laevis], LOC100037137 protein [Xenopus laevis], aarF domain containing kinase 4 [Xenopus laevis], NA	Q8NI60, Q96D53	COQ8A, COQ8B	ADCK3 CABC1, ADCK4	AarF domain containing kinase	0.021487082065117284	0.2679824799095653	FALSE	FALSE	FALSE
ENOG411CUUS	1	1	5	4	1.6181265945922993	1.2392234788223713	1.561272394676056	1.1480514658132348	1	4.5	2.0204516131353927	ENOG411CUUS	118403006, 148237970	GenBank	NA	chromatin assembly factor 1 [Xenopus laevis], chromatin assembly factor-1 p60 subunit [Xenopus laevis]	Q13112	CHAF1B	CAF1A CAF1P60 MPHOSPH7 MPP7	Chromatin assembly factor 1, subunit B (P60)	0.0216682821763	0.26886358292225304	FALSE	FALSE	FALSE
ENOG411CXKR	4	12	10	21	1.5768151979948566	1.23497659317958	1.1138134177048344	0.5851152714220775	8	15.5	1.9882370428241127	ENOG411CXKR	156720197, Xelaev18016289m.g	GenBank, Xenbase_9.1	cul5.S	Cullin5 [Xenopus laevis], NA	Q93034	CUL5	VACM1	cullin 5	0.02339273997561024	0.2887875310694625	FALSE	FALSE	FALSE
ENOG411CR66	0	4	1	12	0.9954389325039961	1.802312935000598	0.9763098939548995	1.204634994179602	2	6.5	1.9783093175898256	ENOG411CR66	112419319, 120577668, 28422594, 50414537, 77748280, Xelaev18047360m.g	GenBank, Xenbase_9.1	nop58.S	MGC78950 protein [Xenopus laevis], LOC398558 protein [Xenopus laevis], NA	Q9Y2X3	NOP58	NOL5 NOP5	NOP58 ribonucleoprotein homolog (yeast)	0.02394691131180734	0.2906716884459511	FALSE	FALSE	FALSE
ENOG411CRUF	26	33	35	54	1.0865712694140472	1.7029023401349923	0.3913473932337433	0.5200202432001926	29.5	44.5	1.9724557052530416	ENOG411CRUF	148233086, 148234126, 148237834, 27695247, Xelaev18010218m.g, Xelaev18007023m.g, Xelaev18046218m.g	GenBank, Xenbase_9.1	pck2.S, pck2.L, pck1.S	cytosolic phosphoenolpyruvate carboxykinase 1 [Xenopus laevis], phosphoenolpyruvate carboxykinase 1 (soluble) [Xenopus laevis], phosphoenolpyruvate carboxykinase 2 (mitochondrial) [Xenopus laevis], PCK2 protein [Xenopus laevis], NA	P35558, Q16822	PCK1, PCK2	PEPCK1, PEPCK2	phosphoenolpyruvate carboxykinase	0.02427880404372244	0.2906716884459511	FALSE	FALSE	FALSE
ENOG411CYCD	83	129	102	174	1.2817351201274156	1.5040302538377803	0.2704929983593576	0.25496666972974685	106	138	1.9698335867254686	ENOG411CYCD	148223359, Xelaev18013400m.g	GenBank, Xenbase_9.1	atp5b.L	mitochondrial ATP synthase beta subunit [Xenopus laevis], NA	P06576	ATP5F1B	ATP5B ATPMB ATPSB	Produces ATP from ADP in the presence of a proton gradient across the membrane (By similarity)	0.02442872295463789	0.2906716884459511	FALSE	FALSE	FALSE
ENOG411CTZV	0	0	2	2	1.407788694550312	1.3701428965181228	1.561272394676056	1.4110858716470287	0	2	1.9642942657168254	ENOG411CTZV	224555762, 54038573, 66911163, Xelaev18017170m.g, Xelaev18021479m.g	GenBank, Xenbase_9.1	rad50.L, rad50.S	Rad50 [Xenopus laevis], LOC495064 protein [Xenopus laevis], NA	Q92878	RAD50	NA	RAD50 homolog (S. cerevisiae)	0.024747988153223915	0.2906716884459511	FALSE	FALSE	FALSE
ENOG411CT96	0	0	2	2	1.407788694550312	1.3701428965181228	1.561272394676056	1.4110858716470287	0	2	1.9642942657168254	ENOG411CT96	126631763, 147904732, 148230667, 148234018, Xelaev18047419m.g, Xelaev18043074m.g, Xelaev18045030m.g, Xelaev18045854m.g, Xelaev18045853m.g	GenBank, Xenbase_9.1	stat1.S, Xelaev18043074m.g, stat1.L, Xelaev18045854m.g, Xelaev18045853m.g	Unknown (protein for MGC:160806) [Xenopus laevis], signal transducer and activator of transcription 1, 91kDa [Xenopus laevis], signal transducer and activator of transcription 3.1 [Xenopus laevis], signal transducer and activator of transcription 3.2 [Xenopus laevis], NA	P42224, P40763	STAT1, STAT3	NA, APRF	Signal transducer and activator of transcription	0.024747988153223915	0.2906716884459511	FALSE	FALSE	FALSE
ENOG411CZ8X	0	0	2	2	1.407788694550312	1.3701428965181228	1.561272394676056	1.4110858716470287	0	2	1.9642942657168254	ENOG411CZ8X	147905290, Xelaev18023197m.g	GenBank, Xenbase_9.1	ndc1.L	nucleoporin NDC1 [Xenopus laevis], NA	Q9BTX1	NDC1	TMEM48	Transmembrane protein 48	0.024747988153223915	0.2906716884459511	FALSE	FALSE	FALSE
ENOG411CXXZ	0	0	2	2	1.407788694550312	1.3701428965181228	1.561272394676056	1.4110858716470287	0	2	1.9642942657168254	ENOG411CXXZ	148233628, 162287235, Xelaev18005468m.g, Xelaev18009212m.g	GenBank, Xenbase_9.1	plrg1.L, plrg1.S	pleiotropic regulator 1 [Xenopus laevis], uncharacterized protein LOC495006 [Xenopus laevis], NA	O43660	PLRG1	NA	Pleiotropic regulator 1	0.024747988153223915	0.2906716884459511	FALSE	FALSE	FALSE
ENOG411CX0T	0	0	2	2	1.407788694550312	1.3701428965181228	1.561272394676056	1.4110858716470287	0	2	1.9642942657168254	ENOG411CX0T	147901478	GenBank	NA	60S ribosomal export protein NMD3 [Xenopus laevis]	Q96D46	NMD3	NA	NMD3 homolog (S. cerevisiae)	0.024747988153223915	0.2906716884459511	FALSE	FALSE	FALSE
ENOG411CR5I	0	0	2	2	1.407788694550312	1.3701428965181228	1.561272394676056	1.4110858716470287	0	2	1.9642942657168254	ENOG411CR5I	Xelaev18041688m.g, Xelaev18002825m.g, Xelaev18019888m.g, Xelaev18002996m.g	Xenbase_9.1	kdm5c.S, kdm5c.L, kdm5a-like.1.S, kdm5a-like.1.L	NA	P29375, P41229, Q9BY66	KDM5A, KDM5C, KDM5D	JARID1A RBBP2 RBP2, DXS1272E JARID1C SMCX XE169, HY HYA JARID1D KIAA0234 SMCY	lysine (K)-specific demethylase	0.024747988153223915	0.2906716884459511	FALSE	FALSE	FALSE
ENOG411CVWQ	0	1	1	6	0.9954389325039961	1.7797624090697997	0.9763098939548995	1.6334782929834764	0.5	3.5	1.9623636877848352	ENOG411CVWQ	116487821, 11878269, 150416158, 161612099, 350994444, 350994446, 47125185, 63409950, Xelaev18007548m.g, Xelaev18047841m.g, Xelaev18045620m.g	GenBank, Xenbase_9.1	pxn.L, tgfb1i1.S, tgfb1i1.L	Tgfb1i1 protein [Xenopus laevis], paxillin [Xenopus laevis], RecName: Full=Transforming growth factor beta-1-induced transcript 1 protein; AltName: Full=Androgen receptor activator of 55 kDa; AltName: Full=Hydrogen peroxide-inducible clone 5 protein; Short=Hic-5, Hic-5 [Xenopus laevis], transforming growth factor beta-1-induced transcript 1 protein [Xenopus laevis], LOC397826 protein [Xenopus lae…	O43294, O60711, P49023	TGFB1I1, LPXN, PXN	ARA55, LDLP, NA	transforming growth factor beta 1 induced transcript 1	0.024860078617087923	0.2906716884459511	FALSE	FALSE	FALSE
ENOG411CQNX	0	1	1	6	0.9954389325039961	1.7797624090697997	0.9763098939548995	1.6334782929834764	0.5	3.5	1.9623636877848352	ENOG411CQNX	Xelaev18016323m.g, Xelaev18007746m.g, Xelaev18014073m.g	Xenbase_9.1	piwil4.S, piwil1.L, piwil3.L	NA	Q96J94, Q7Z3Z4	PIWIL1, PIWIL4	HIWI, HIWI2 PIWI	piwi-like	0.024860078617087923	0.2906716884459511	FALSE	FALSE	FALSE
ENOG411CX6E	3	8	7	17	1.2417650990384717	1.5272781286144146	0.9763098939548995	0.8261233709258723	5.5	12	1.9580092436720407	ENOG411CX6E	13431459, Xelaev18018645m.g	GenBank, Xenbase_9.1	pold2.L	RecName: Full=DNA polymerase delta subunit 2; AltName: Full=XlCdc1, NA	P49005	POLD2	NA	polymerase (DNA directed), delta 2, accessory subunit	0.02511446402216873	0.2922410358943271	FALSE	FALSE	FALSE
ENOG411DFH2	12	14	19	26	1.212224364972535	1.5386287673168326	0.5977982707011698	0.6741202774808224	13	22.5	1.9451469038900666	ENOG411DFH2	147904138, 218749891, 28302346, 54311369, Xelaev18028958m.g, Xelaev18038829m.g, Xelaev18026704m.g	GenBank, Xenbase_9.1	Xelaev18028958m.g, Xelaev18038829m.g, Xelaev18026704m.g	heterogeneous nuclear ribonucleoprotein U (scaffold attachment factor A) [Xenopus laevis], heterogeneous nuclear ribonucleoprotein U [Xenopus laevis], Hnrnpu protein [Xenopus laevis], Saf-A protein [Xenopus laevis], NA	NA	NA	NA	Heterogeneous nuclear ribonucleoprotein U (Scaffold attachment factor A)	0.025878650058317135	0.29896193070951166	FALSE	FALSE	FALSE
ENOG411CX81	5	7	13	12	1.8557508446051971	0.8937108668989081	1.1987023152913476	0.5265630890669644	6	12.5	1.9441630208173235	ENOG411CX81	147902158, 148222603, 28277248, Xelaev18013442m.g, Xelaev18015937m.g	GenBank, Xenbase_9.1	dctn2.L, dctn2.S	dynactin subunit 2-B [Xenopus laevis], dynactin subunit 2-A [Xenopus laevis], Dctn2-prov protein [Xenopus laevis], NA	Q13561	DCTN2	DCTN50	Dynactin 2 (P50)	0.025937897771261088	0.29896193070951166	FALSE	FALSE	FALSE
ENOG411CWER	0	3	2	8	1.407788694550312	1.3380345033343874	1.561272394676056	0.9960483723681846	1.5	5	1.9415902031636023	ENOG411CWER	125654, 147905211, 148224421, 148233173, 148235142, 148236905, 213623836, 241260, 38175247, 51258561, 52145402, Xelaev18001868m.g, Xelaev18019800m.g, Xelaev18002603m.g	GenBank, Xenbase_9.1	raf1.L, braf.S, raf1.S	RecName: Full=RAF proto-oncogene serine/threonine-protein kinase; AltName: Full=C-RAF, v-raf murine sarcoma 3611 viral oncogene homolog [Xenopus laevis], MGC86346 protein [Xenopus laevis], RAF proto-oncogene serine/threonine-protein kinase [Xenopus laevis], B-Raf [Xenopus laevis], BRAF protein [Xenopus laevis], raf protein [Xenopus laevis], serine/threonine protein kinase ARAF [Xenopus laevis], NA	P15056, P04049, P10398	BRAF, RAF1, ARAF	BRAF1 RAFB1, RAF, ARAF1 PKS PKS2	viral oncogene homolog	0.026093364913914244	0.299335205050186	FALSE	FALSE	FALSE
ENOG411DGFH	0	0	0	8	0	2.7404435391028095	0	2.9960483723681848	0	4	1.937786209958458	ENOG411DGFH	147902762, Xelaev18013240m.g	GenBank, Xenbase_9.1	vwa8.L	uncharacterized protein LOC398849 [Xenopus laevis], NA	NA	NA	NA	von Willebrand factor A domain containing 8	0.02632465543801962	0.3005707137336325	FALSE	FALSE	FALSE
ENOG411DEYD	5	18	10	31	1.261503916493127	1.4512283078866286	0.8507790118710405	0.5781958574822866	11.5	20.5	1.918191351402192	ENOG411DEYD	148228921, Xelaev18014555m.g	GenBank, Xenbase_9.1	rps6ka3.S	ribosomal protein S6 kinase, 90kDa, polypeptide 3 [Xenopus laevis], NA	P51812	RPS6KA3	ISPK1 MAPKAPK1B RSK2	Protein kinase C terminal domain	0.027543376231882962	0.3130163130651372	FALSE	FALSE	FALSE
ENOG411CWTU	3	6	6	15	0.9770506825627818	1.725526231128488	0.7836648160125037	1.0187684488682682	4.5	10.5	1.9110104623493076	ENOG411CWTU	189442240, Xelaev18027789m.g, Xelaev18042117m.g, Xelaev18029864m.g, Xelaev18038796m.g	GenBank, Xenbase_9.1	acsl3.L, acsl4.S, acsl3.S, acsl4.L	LOC100174803 protein [Xenopus laevis], NA	O95573, O60488	ACSL3, ACSL4	ACS3 FACL3 LACS3, ACS4 FACL4 LACS4	Acyl-CoA synthetase long-chain family member	0.02800161819838356	0.31674388585334334	FALSE	FALSE	FALSE
ENOG411CUSR	0	0	3	1	1.7242131620693701	0.9688280389827452	1.9763098939548995	0.8261233709258723	0	2	1.9042676952787152	ENOG411CUSR	Xelaev18001094m.g, Xelaev18023980m.g, Xelaev18019680m.g	Xenbase_9.1	polr2a.S, Xelaev18023980m.g, polr2a.L	NA	P24928	POLR2A	POLR2	polymerase (RNA) II (DNA directed) polypeptide A	0.028437664617232516	0.3187115223461266	FALSE	FALSE	FALSE
ENOG411D31G	0	0	3	1	1.7242131620693701	0.9688280389827452	1.9763098939548995	0.8261233709258723	0	2	1.9042676952787152	ENOG411D31G	148223027, Xelaev18039064m.g, Xelaev18042364m.g	GenBank, Xenbase_9.1	opa3.L, opa3.S	optic atrophy 3 protein homolog [Xenopus laevis], NA	Q9H6K4	OPA3	NA	optic atrophy 3 (autosomal recessive, with chorea and spastic paraplegia)	0.028437664617232516	0.3187115223461266	FALSE	FALSE	FALSE
ENOG411CW5E	6	12	9	26	0.7425457522148697	1.9370213397487563	0.49088306678465793	0.880571154948249	9	17.5	1.894740061371797	ENOG411CW5E	147905268, 148228466, 148231835, Xelaev18020100m.g, Xelaev18018948m.g	GenBank, Xenbase_9.1	ddx39a.S, ddx39a.L	nuclear RNA helicase [Xenopus laevis], DEAD (Asp-Glu-Ala-Asp) box polypeptide 39B [Xenopus laevis], DEAD (Asp-Glu-Ala-Asp) box polypeptide 39A [Xenopus laevis], NA	Q13838, O00148	DDX39B, DDX39A	BAT1 UAP56, DDX39	DEAD (Asp-Glu-Ala-Asp) box polypeptide	0.029063423751179863	0.3216503109275518	FALSE	FALSE	FALSE
ENOG411CPNE	84	104	86	163	0.033418612295787214	2.641868773730897	0.009862453665925973	0.4694298578778334	94	124.5	1.891713852282301	ENOG411CPNE	169642429, 171846443, Xelaev18026241m.g, Xelaev18028669m.g	GenBank, Xenbase_9.1	eprs-like.L, eprs-like.S	LOC100158287 protein [Xenopus laevis], LOC100158438 protein [Xenopus laevis], NA	P07814	EPRS	GLNS PARS QARS QPRS	Glutamyl-prolyl-tRNA synthetase	0.029264558341488965	0.3216503109275518	FALSE	FALSE	FALSE
ENOG411CU4S	0	0	1	3	0.9954389325039961	1.6780915843162603	0.9763098939548995	1.8261233709258722	0	2	1.8904715581527782	ENOG411CU4S	148227234, 148229828, Xelaev18043214m.g, Xelaev18045976m.g	GenBank, Xenbase_9.1	cdk5rap3.L, cdk5rap3.S	CDK5 regulatory subunit associated protein 3 [Xenopus laevis], uncharacterized protein LOC734249 [Xenopus laevis], NA	Q96JB5	CDK5RAP3	IC53 LZAP	CDK5 regulatory subunit associated protein 3	0.02934746048151128	0.3216503109275518	FALSE	FALSE	FALSE
ENOG411CXXF	0	0	1	3	0.9954389325039961	1.6780915843162603	0.9763098939548995	1.8261233709258722	0	2	1.8904715581527782	ENOG411CXXF	148230567, 46329779, Xelaev18043450m.g, Xelaev18046183m.g	GenBank, Xenbase_9.1	dpm1.L, dpm1.S	dolichyl-phosphate mannosyltransferase polypeptide 1, catalytic subunit [Xenopus laevis], LOC414689 protein [Xenopus laevis], NA	O60762	DPM1	NA	Dolichyl-phosphate mannosyltransferase polypeptide 1, catalytic subunit	0.02934746048151128	0.3216503109275518	FALSE	FALSE	FALSE
ENOG411CURF	1	9	9	11	2.512832829922995	0.16040751965489472	2.298237988842262	0.08915777675966605	5	10	1.8902663789280227	ENOG411CURF	118763696, 148234026, 27370842, 46249846, Xelaev18005164m.g	GenBank, Xenbase_9.1	ncapg.L	LOC398088 protein [Xenopus laevis], condensin complex subunit 3 [Xenopus laevis], NA	Q9BPX3	NCAPG	CAPG NYMEL3	Non-SMC condensin I complex subunit G	0.029361171474472245	0.3216503109275518	FALSE	FALSE	FALSE
ENOG411CT7Y	3	5	12	7	2.2994202450496406	0.3636661400875426	1.6767496120959917	0.241160870204716	4	9.5	1.883086441816072	ENOG411CT7Y	147904320, Xelaev18012800m.g	GenBank, Xenbase_9.1	rfc2.L	replication factor C (activator 1) 2, 40kDa [Xenopus laevis], NA	P35250	RFC2	NA	Replication factor C (Activator 1) 2, 40kDa	0.029844327158609726	0.325477146411385	FALSE	FALSE	FALSE
ENOG411CSGB	10	15	17	26	1.3059600738945039	1.3472144632566143	0.6868032767599145	0.581010873089341	12.5	21.5	1.876077706891035	ENOG411CSGB	116063456, Xelaev18019820m.g, Xelaev18002487m.g	GenBank, Xenbase_9.1	rtcb.S, rtcb.L	MGC154502 protein [Xenopus laevis], NA	Q9Y3I0	RTCB	C22orf28	Catalytic subunit of the tRNA-splicing ligase complex that acts by directly joining spliced tRNA halves to mature-sized tRNAs by incorporating the precursor-derived splice junction phosphate into the mature tRNA as a canonical 3',5'- phosphodiester. May act as a RNA ligase with broad substrate specificity, and may function toward other RNAs (By similarity)	0.030322305184418284	0.32921359914511283	FALSE	FALSE	FALSE
ENOG411CYD2	2	5	4	14	0.797715257795012	1.8451514562478053	0.7132754881211057	1.1480514658132346	3.5	9	1.8687889752718843	ENOG411CYD2	120537950, 148222753, Xelaev18015878m.g, Xelaev18013381m.g	GenBank, Xenbase_9.1	pan2.S, pan2.L	LOC100036851 protein [Xenopus laevis], PAN2 poly(A) specific ribonuclease subunit homolog [Xenopus laevis], NA	Q504Q3	PAN2	KIAA0710 USP52	PAN2 polyA specific ribonuclease subunit homolog (S. cerevisiae)	0.030826089648670993	0.3331957778914127	FALSE	FALSE	FALSE
ENOG411CWK8	3	7	5	18	0.6843146368825122	1.9420253481583774	0.5612723946760559	1.074050884369458	5	11.5	1.8571028131237886	ENOG411CWK8	148236863, Xelaev18026119m.g	GenBank, Xenbase_9.1	msh6.L	mutS homolog 6 [Xenopus laevis], NA	P52701	MSH6	GTBP	MutS homolog 6 (E. coli)	0.03164826403461375	0.34056892978840997	FALSE	FALSE	FALSE
ENOG411CSPY	3	6	7	13	1.2417650990384717	1.369431161573357	0.9763098939548995	0.8261233709258723	4.5	10	1.8463945828875794	ENOG411CSPY	148227250, 148229886	GenBank	NA	activator of heat shock 90kDa protein ATPase homolog 1 [Xenopus laevis], AHA1, activator of heat shock 90kDa protein ATPase homolog 1 [Xenopus laevis]	O95433	AHSA1	C14orf3	AHA1, activator of heat shock 90kDa protein ATPase homolog 1 (Yeast)	0.03241746660641774	0.3473095981797707	FALSE	FALSE	FALSE
ENOG411CXHK	1	2	4	6	1.3273307913105068	1.2743298740759423	1.298237988842262	1.04851579226232	1.5	5	1.8396518988410633	ENOG411CXHK	Xelaev18012743m.g	Xenbase_9.1	gemin4.L	NA	P57678	GEMIN4	NA	Gem (Nuclear organelle) associated protein 4	0.032909679840354054	0.34950367411240635	FALSE	FALSE	FALSE
ENOG411CYT4	1	2	4	6	1.3273307913105068	1.2743298740759423	1.298237988842262	1.04851579226232	1.5	5	1.8396518988410633	ENOG411CYT4	148232198	GenBank	NA	polymerase (RNA) III (DNA directed) polypeptide E (80kD) [Xenopus laevis]	Q9NVU0	POLR3E	KIAA1452	Polymerase (RNA) III (DNA directed) polypeptide E	0.032909679840354054	0.34950367411240635	FALSE	FALSE	FALSE
ENOG411CYGN	1	4	3	11	0.9862276347740007	1.6112190058819011	0.9763098939548995	1.089157776759666	2.5	7	1.8366721333780056	ENOG411CYGN	10998388, 147900383, 47939988	GenBank	NA	ubiquitin fusion degradation 1-like protein [Xenopus laevis], ubiquitin fusion degradation protein 1 homolog [Xenopus laevis], Unknown (protein for MGC:82436) [Xenopus laevis]	Q92890	UFD1	UFD1L	Ubiquitin fusion degradation 1 like (Yeast)	0.03312915573801972	0.3503048119776694	FALSE	FALSE	FALSE
ENOG411CTD5	1	1	4	4	1.3273307913105068	1.2392234788223713	1.298237988842262	1.1480514658132348	1	4	1.814827928694248	ENOG411CTD5	148227640, 148228018, Xelaev18022770m.g, Xelaev18025031m.g	GenBank, Xenbase_9.1	dnaja2.L, dnaja2.S	DnaJ subfamily A member 2 [Xenopus laevis], DnaJ (Hsp40) homolog, subfamily A, member 2 [Xenopus laevis], NA	O60884	DNAJA2	CPR3 HIRIP4	DnaJ (Hsp40) homolog, subfamily A, member 2	0.0347751784882006	0.3628306550313925	FALSE	FALSE	FALSE
ENOG411CVXP	4	8	7	18	0.8782196729638821	1.687682188795142	0.654381799067537	0.9041258829271458	6	12.5	1.8143666063089932	ENOG411CVXP	147906799, 148223649, 148227896, 148231603, 66910774, Xelaev18044062m.g, Xelaev18047789m.g, Xelaev18046704m.g, Xelaev18045557m.g	GenBank, Xenbase_9.1	llgl2.L, llgl1.S, llgl2.S, llgl1.L	lethal giant larvae homolog 1 [Xenopus laevis], MGC80416 protein [Xenopus laevis], lethal giant larvae homolog 2 [Xenopus laevis], lethal giant larvae [Xenopus laevis], NA	Q15334, Q6P1M3	LLGL1, LLGL2	DLG4 HUGL HUGL1, NA	Lethal giant larvae homolog	0.03481065167044828	0.3628306550313925	FALSE	FALSE	FALSE
ENOG411CZDC	28	41	36	64	0.931647247196304	1.633661772383849	0.32778226445627734	0.45617376117556646	34.5	50	1.8139474035841396	ENOG411CZDC	108935850, 147898891, 1753193, Xelaev18025893m.g	GenBank, Xenbase_9.1	mcm2.S	RecName: Full=DNA replication licensing factor mcm2; AltName: Full=BM28-homolog; AltName: Full=Minichromosome maintenance protein 2; Short=xMCM2; AltName: Full=p112, DNA replication licensing factor mcm2 [Xenopus laevis], xMCM2 [Xenopus laevis], NA	P49736	MCM2	BM28 CCNL1 CDCL1 KIAA0030	Minichromosome maintenance complex component 2	0.03484291183899721	0.3628306550313925	FALSE	FALSE	FALSE
ENOG411CY20	0	0	0	7	0	2.563425608021629	0	2.826123370925872	0	3.5	1.8126156304993426	ENOG411CY20	148235751, 28422163, Xelaev18045423m.g	GenBank, Xenbase_9.1	plk1.L	serine/threonine-protein kinase PLK1 [Xenopus laevis], Plk-prov protein [Xenopus laevis], NA	P53350	PLK1	PLK	polo-like kinase 1	0.034945562664534524	0.3628306550313925	FALSE	FALSE	FALSE
ENOG411CTH9	12	30	22	42	1.6700268980621138	0.8913097692900168	0.7994321318708202	0.29819181524109517	21	32	1.811138526386444	ENOG411CTH9	148222118, 148223037, 28302264, Xelaev18021791m.g	GenBank, Xenbase_9.1	ipo7.L	importin 7 [Xenopus laevis], uncharacterized protein LOC431890 [Xenopus laevis], MGC52556 protein [Xenopus laevis], NA	O95373, O15397	IPO7, IPO8	RANBP7, RANBP8	importin	0.035059705564299846	0.3628306550313925	FALSE	FALSE	FALSE
ENOG411CZ97	11	10	15	22	0.7412482204872921	1.8160211368742052	0.3913473932337433	0.890253708345588	10.5	18.5	1.8082625039108793	ENOG411CZ97	Xelaev18009523m.g, Xelaev18005855m.g	Xenbase_9.1	loc100490725.S, loc100490725.L	NA	O95210	STBD1	NA	Starch binding domain 1	0.0352828273635392	0.363592526051387	FALSE	FALSE	FALSE
ENOG411CWD9	8	15	9	34	0.20553617988258863	2.340177137366766	0.12831298739994956	0.9554063878708388	11.5	21.5	1.8000911495839196	ENOG411CWD9	Xelaev18045445m.g, Xelaev18047705m.g	Xenbase_9.1	trap1.L, trap1.S	NA	Q12931	TRAP1	HSP75	TNF receptor-associated protein 1	0.03592312342916761	0.36862884464023477	FALSE	FALSE	FALSE
ENOG411CUU4	30	66	46	85	1.7655861235819157	0.7707883876623601	0.5767024352456617	0.18629893517019794	48	65.5	1.7934876165295424	ENOG411CUU4	147900889, Xelaev18021444m.g	GenBank, Xenbase_9.1	lars.S	leucyl-tRNA synthetase [Xenopus laevis], NA	Q9P2J5	LARS	KIAA1352	leucyl-trna synthetase	0.03644749449167932	0.3724382630410256	FALSE	FALSE	FALSE
ENOG411CXHY	0	1	1	5	0.9954389325039961	1.5268033056798456	0.9763098939548995	1.4110858716470287	0.5	3	1.7834945904149295	ENOG411CXHY	148232088, Xelaev18034689m.g, Xelaev18004498m.g, Xelaev18037083m.g	GenBank, Xenbase_9.1	Xelaev18034689m.g, Xelaev18004498m.g, Xelaev18037083m.g	MMS19 nucleotide excision repair homolog [Xenopus laevis], NA	Q96T76	MMS19	MMS19L	MMS19 nucleotide excision repair homolog (S. cerevisiae)	0.0372529138966833	0.37691081847510843	FALSE	FALSE	FALSE
ENOG411CPV1	1	4	4	9	1.3273307913105068	1.1932226486344832	1.298237988842262	0.8261233709258724	2.5	6.5	1.7823004297281817	ENOG411CPV1	147901061, 148230021, Xelaev18019057m.g	GenBank, Xenbase_9.1	farsa.L	phenylalanyl-tRNA synthetase alpha chain B [Xenopus laevis], phenylalanyl-tRNA synthetase alpha chain A [Xenopus laevis], NA	Q9Y285	FARSA	FARS FARSL FARSLA	Phenylalanyl-tRNA synthetase alpha subunit	0.03735012633737711	0.37691081847510843	FALSE	FALSE	FALSE
ENOG411CRUN	1	4	4	9	1.3273307913105068	1.1932226486344832	1.298237988842262	0.8261233709258724	2.5	6.5	1.7823004297281817	ENOG411CRUN	146327763, Xelaev18016662m.g, Xelaev18016661m.g	GenBank, Xenbase_9.1	atxn10.L, Xelaev18016661m.g	LOC100049766 protein [Xenopus laevis], NA	Q9UBB4	ATXN10	SCA10	ataxin 10	0.03735012633737711	0.37691081847510843	FALSE	FALSE	FALSE
ENOG411CTW8	3	4	4	14	0.35526851083729444	2.1560539618941084	0.298237988842262	1.4110858716470287	3.5	9	1.7757731502145433	ENOG411CTW8	Xelaev18028069m.g	Xenbase_9.1	nbas.L	NA	A2RRP1	NBAS	NAG	Neuroblastoma amplified sequence	0.03788515744055545	0.3807301772538465	FALSE	FALSE	FALSE
ENOG411CP4W	0	3	2	7	1.407788694550312	1.0969321796323708	1.561272394676056	0.8261233709258723	1.5	4.5	1.771105115114072	ENOG411CP4W	Xelaev18021204m.g, Xelaev18017511m.g	Xenbase_9.1	xpot.S, xpot.L	NA	O43592	XPOT	NA	exportin, tRNA	0.03827161179006494	0.3830311105902796	FALSE	FALSE	FALSE
ENOG411CS1E	1	0	2	4	0.5640392668774026	1.937711845609288	0.5612723946760559	2.148051465813235	0.5	3	1.769005176480328	ENOG411CS1E	147904310, 28628267, Xelaev18022865m.g, Xelaev18031282m.g	GenBank, Xenbase_9.1	anln-like.1.L, anln.L	actin-binding protein anillin [Xenopus laevis], contractile ring component anillin [Xenopus laevis], NA	Q9NQW6	ANLN	NA	Anillin, actin binding protein	0.03844650536582262	0.3832045124986911	FALSE	FALSE	FALSE
ENOG411CZ3H	4	7	7	16	0.8782196729638821	1.6205480043941078	0.654381799067537	0.9135862121762117	5.5	11.5	1.7668955692695938	ENOG411CZ3H	Xelaev18042855m.g, Xelaev18040748m.g, Xelaev18003316m.g	Xenbase_9.1	None	NA	O00303	EIF3F	EIF3S5	Component of the eukaryotic translation initiation factor 3 (eIF-3) complex, which is required for several steps in the initiation of protein synthesis. The eIF-3 complex associates with the 40S ribosome and facilitates the recruitment of eIF-1, eIF-1A, eIF-2 GTP methionyl-tRNAi and eIF-5 to form the 43S preinitiation complex (43S PIC). The eIF-3 complex stimulates mRNA recruitment to the 43S PIC…	0.03862285959772663	0.38339099812927	FALSE	FALSE	FALSE
ENOG411CPNI	2	5	6	10	1.394837396380582	1.075834029817418	1.1987023152913476	0.7005924888420134	3.5	8	1.7470285195484443	ENOG411CPNI	124481862, 148222140, 50414577, Xelaev18039864m.g, Xelaev18041091m.g	GenBank, Xenbase_9.1	rpap1.L, rpap1.S	LOC445849 protein [Xenopus laevis], RNA polymerase II associated protein 1 [Xenopus laevis], NA	Q9BWH6	RPAP1	KIAA1403	RNA polymerase II associated protein 1	0.040316195585483196	0.3985731205849396	FALSE	FALSE	FALSE
ENOG411CZFK	32	80	40	114	0.8697466553006812	1.5890546012682474	0.2894677792145297	0.3317634189856228	56	77	1.7386350421098933	ENOG411CZFK	Xelaev18041192m.g, Xelaev18039698m.g	Xenbase_9.1	dync1h1.S, dync1h1.L	NA	Q14204	DYNC1H1	DHC1 DNCH1 DNCL DNECL DYHC KIAA0325	dynein, cytoplasmic 1, heavy chain 1	0.041049489302713967	0.40417958698056833	FALSE	FALSE	FALSE
ENOG411CS1K	2	7	4	16	0.797715257795012	1.6205480043941078	0.7132754881211057	0.9135862121762117	4.5	10	1.7099703513882285	ENOG411CS1K	Xelaev18005634m.g, Xelaev18016955m.g, Xelaev18009334m.g, Xelaev18020080m.g	Xenbase_9.1	sec24b.L, sec24a.L, sec24b.S, sec24a.S	NA	O95487, O95486	SEC24B, SEC24A	NA	SEC24 family, member	0.043635677878473854	0.4098903065368873	FALSE	FALSE	FALSE
ENOG411CS7N	18	35	24	55	0.870777952824462	1.543505655533794	0.37223857028603874	0.46355329154116426	26.5	39.5	1.7071563111776495	ENOG411CS7N	147904152, 148234316, Xelaev18008676m.g, Xelaev18041787m.g	GenBank, Xenbase_9.1	idh3b.S, idh3g.S	isocitrate dehydrogenase 3 (NAD+) gamma [Xenopus laevis], isocitrate dehydrogenase 3 (NAD+) beta [Xenopus laevis], NA	P51553, O43837	IDH3G, IDH3B	NA	Isocitrate dehydrogenase 3 (NAD)	0.04389650147373225	0.4098903065368873	FALSE	FALSE	FALSE
ENOG411CRUA	2	4	3	13	0.42863145307757394	1.9835285447816442	0.3913473932337433	1.3115501980961142	3	8	1.7056546917931812	ENOG411CRUA	148237364, Xelaev18023166m.g, Xelaev18010054m.g, Xelaev18025267m.g	GenBank, Xenbase_9.1	ttc39a.L, ttc39b.S, ttc39a.S	tetratricopeptide repeat protein 39B [Xenopus laevis], NA	Q5SRH9, Q5VTQ0	TTC39A, TTC39B	C1orf34 KIAA0452, C9orf52	tetratricopeptide repeat domain	0.04403619503466074	0.4098903065368873	FALSE	FALSE	FALSE
ENOG411CU8S	0	1	0	9	0	2.4082892706932744	0	2.148051465813235	0.5	4.5	1.7029176743660193	ENOG411CU8S	Xelaev18036694m.g, Xelaev18035703m.g, Xelaev18034330m.g	Xenbase_9.1	rimklb-like.S, rimkla.L, rimklb-like.L	NA	Q9ULI2, Q8IXN7	RIMKLB, RIMKLA	FAM80B KIAA1238, FAM80A	ribosomal modification protein rimK-like family member	0.04429173797018702	0.4098903065368873	FALSE	FALSE	FALSE
ENOG411DFW5	0	2	3	4	1.7242131620693701	0.6803584288480714	1.9763098939548995	0.5630889650920785	1	3.5	1.7002888777862477	ENOG411DFW5	Xelaev18039681m.g, Xelaev18041205m.g	Xenbase_9.1	loc100495318-like.L, loc100495318-like.S	NA	O00423	EML1	EMAP1 EMAPL EMAPL1	Echinoderm microtubule associated protein like	0.04453830073972376	0.4098903065368873	FALSE	FALSE	FALSE
ENOG411CXDQ	0	2	3	4	1.7242131620693701	0.6803584288480714	1.9763098939548995	0.5630889650920785	1	3.5	1.7002888777862477	ENOG411CXDQ	118763664, 126631294, 148236661, 50603946, 52430491, Xelaev18044363m.g	GenBank, Xenbase_9.1	clasp1.L	Clasp1b protein [Xenopus laevis], Clasp1a protein [Xenopus laevis], CLIP-associating protein 1-A [Xenopus laevis], NA	Q7Z460, O75122	CLASP1, CLASP2	KIAA0622 MAST1, KIAA0627	cytoplasmic linker associated protein	0.04453830073972376	0.4098903065368873	FALSE	FALSE	FALSE
ENOG411CR8Q	0	4	1	10	0.9954389325039961	1.4087916306835884	0.9763098939548995	0.9636268946758073	2	5.5	1.7000477347658933	ENOG411CR8Q	Xelaev18026661m.g	Xenbase_9.1	mtr.L	NA	Q99707	MTR	NA	5-methyltetrahydrofolate-homocysteine methyltransferase	0.044560973530004565	0.4098903065368873	FALSE	FALSE	FALSE
ENOG411CVY2	0	2	2	5	1.407788694550312	0.9960992101179701	1.561272394676056	0.8261233709258723	1	3.5	1.699805438603263	ENOG411CVY2	147906160	GenBank	NA	elongator complex protein 3 [Xenopus laevis]	Q9H9T3	ELP3	NA	elongator acetyltransferase complex subunit 3	0.04458376410474217	0.4098903065368873	FALSE	FALSE	FALSE
ENOG411CPUN	8	17	11	32	0.6513122333417994	1.7475445843800073	0.3913473932337433	0.7005924888420134	12.5	21.5	1.6962479229066711	ENOG411CPUN	148237924, Xelaev18045189m.g, Xelaev18047512m.g	GenBank, Xenbase_9.1	nomo3.L, nomo3.S	NODAL modulator 3 [Xenopus laevis], NA	Q15155, Q5JPE7, P69849	NOMO1, NOMO2, NOMO3	PM5, NA	nodal modulator	0.04491946913821731	0.4098903065368873	FALSE	FALSE	FALSE
ENOG411CTFH	10	17	11	36	0.17685165925392932	2.2129513157797165	0.10184077603875842	0.8656517351125098	13.5	23.5	1.6898458893460764	ENOG411CTFH	147898905, 147905173, Xelaev18013438m.g, Xelaev18013439m.g, Xelaev18015931m.g	GenBank, Xenbase_9.1	mars.L, Xetrov90006328m.L, Xetrov90006328m.S	methionyl-tRNA synthetase [Xenopus laevis], methionyl-tRNA synthetase, cytoplasmic [Xenopus laevis], NA	P56192	MARS	NA	methionyl-tRNA synthetase	0.045528720972787026	0.4098903065368873	FALSE	FALSE	FALSE
ENOG411CUZ0	10	16	15	28	0.9587959158305138	1.426178735963131	0.516878275317602	0.5966415248031052	13	21.5	1.6864317492413112	ENOG411CUZ0	Xelaev18002193m.g	Xenbase_9.1	tufm.S	NA	P49411	TUFM	NA	This protein promotes the GTP-dependent binding of aminoacyl-tRNA to the A-site of ribosomes during protein biosynthesis (By similarity)	0.04585633526217425	0.4098903065368873	FALSE	FALSE	FALSE
ENOG411CX7V	11	26	18	39	1.2567255619245068	1.1255745900341998	0.6392749066773287	0.3931639636497663	18.5	28.5	1.684540592271744	ENOG411CX7V	147900810, Xelaev18045232m.g, Xelaev18047547m.g	GenBank, Xenbase_9.1	eif3b.L, eif3b.S	eukaryotic translation initiation factor 3 subunit B [Xenopus laevis], NA	P55884	EIF3B	EIF3S9	Component of the eukaryotic translation initiation factor 3 (eIF-3) complex, which is involved in protein synthesis and, together with other initiation factors, stimulates binding of mRNA and methionyl-tRNAi to the 40S ribosome (By similarity)	0.04603862073663405	0.4098903065368873	FALSE	FALSE	FALSE
ENOG411CRG1	0	0	2	1	1.407788694550312	0.9688280389827452	1.561272394676056	0.8261233709258723	0	1.5	1.6805218085626468	ENOG411CRG1	116063404	GenBank	NA	MGC154488 protein [Xenopus laevis]	Q7Z7A3	CTU1	ATPBD3 NCS6	cytosolic thiouridylase subunit 1 homolog (S. pombe)	0.04642791738866586	0.4098903065368873	FALSE	FALSE	FALSE
ENOG411CUVM	0	0	2	1	1.407788694550312	0.9688280389827452	1.561272394676056	0.8261233709258723	0	1.5	1.6805218085626468	ENOG411CUVM	147898503, Xelaev18039986m.g, Xelaev18028984m.g, Xelaev18026729m.g	GenBank, Xenbase_9.1	fam98b.L, loc100488558-like.S, loc100488558-like.L	family with sequence similarity 98, member B [Xenopus laevis], NA	Q8NCA5, Q52LJ0	FAM98A, FAM98B	NA	Family with sequence similarity 98, member	0.04642791738866586	0.4098903065368873	FALSE	FALSE	FALSE
ENOG411CWEY	0	0	2	1	1.407788694550312	0.9688280389827452	1.561272394676056	0.8261233709258723	0	1.5	1.6805218085626468	ENOG411CWEY	148229338, Xelaev18030537m.g	GenBank, Xenbase_9.1	tbrg4.L	protein TBRG4 [Xenopus laevis], NA	Q969Z0	TBRG4	CPR2 FASTKD4 KIAA0948	Transforming growth factor beta regulator 4	0.04642791738866586	0.4098903065368873	FALSE	FALSE	FALSE
ENOG411CU3M	0	0	2	1	1.407788694550312	0.9688280389827452	1.561272394676056	0.8261233709258723	0	1.5	1.6805218085626468	ENOG411CU3M	115528267	GenBank	NA	LOC100158346 protein [Xenopus laevis]	Q9UPT5	EXOC7	EXO70 KIAA1067	exocyst complex component 7	0.04642791738866586	0.4098903065368873	FALSE	FALSE	FALSE
ENOG411CQMM	0	0	0	6	0	2.37324818251162	0	2.6334782929834764	0	3	1.6781398832926155	ENOG411CQMM	148227146, Xelaev18012497m.g, Xelaev18015180m.g	GenBank, Xenbase_9.1	sf3a3.L, sf3a3.S	splicing factor 3a, subunit 3, 60kDa [Xenopus laevis], NA	Q12874	SF3A3	SAP61	splicing factor 3a, subunit 3, 60kDa	0.04665989717237272	0.4098903065368873	FALSE	FALSE	FALSE
1911542	0	0	0	6	0	2.37324818251162	0	2.6334782929834764	0	3	1.6781398832926155	1911542	NA	GenBank	NA	lipovitellin 1, pCdZn=Zn(2+)- and Cd(2+)-binding protein. [Xenopus laevis, Xenopus I, Ann Arbor, MI, oocytes, Peptide Partial, 23 aa, segment 1 of 2]	NA	NA	NA	NA	0.04665989717237272	0.4098903065368873	FALSE	FALSE	FALSE
ENOG411CVF8	0	0	0	6	0	2.37324818251162	0	2.6334782929834764	0	3	1.6781398832926155	ENOG411CVF8	147899268, 148231776, Xelaev18019730m.g, Xelaev18014684m.g, Xelaev18016646m.g	GenBank, Xenbase_9.1	stk38l.S, stk38-like.S, stk38l.L	serine/threonine kinase 38 [Xenopus laevis], serine/threonine kinase 38 like [Xenopus laevis], NA	Q15208, Q9Y2H1	STK38, STK38L	NDR1, KIAA0965 NDR2	Serine Threonine Kinase 38	0.04665989717237272	0.4098903065368873	FALSE	FALSE	FALSE
ENOG411CW4D	7	17	15	24	1.6708072452228269	0.6993886386742204	0.9763098939548995	0.30005455925828467	12	19.5	1.675981582244045	ENOG411CW4D	147906079, Xelaev18047167m.g	GenBank, Xenbase_9.1	hat1.S	histone acetyltransferase 1 [Xenopus laevis], NA	O14929	HAT1	KAT1	Histone acetyltransferase 1	0.0468709001209118	0.4098903065368873	FALSE	FALSE	FALSE
ENOG411CPXC	15	23	18	42	0.47174023732675785	1.897516920189895	0.2242374073984849	0.667425624906814	19	30	1.6753178024547892	ENOG411CPXC	209969740, 47938740, Xelaev18002234m.g, Xelaev18001297m.g	GenBank, Xenbase_9.1	eif3c.S, eif3c.L	eukaryotic translation initiation factor 3 subunit C [Xenopus laevis], LOC432230 protein [Xenopus laevis], NA	Q99613, B5ME19	EIF3C, EIF3CL	EIF3S8, NA	Component of the eukaryotic translation initiation factor 3 (eIF-3) complex, which is required for several steps in the initiation of protein synthesis. The eIF-3 complex associates with the 40S ribosome and facilitates the recruitment of eIF-1, eIF-1A, eIF-2 GTP methionyl-tRNAi and eIF-5 to form the 43S preinitiation complex (43S PIC). The eIF-3 complex stimulates mRNA recruitment to the 43S PIC…	0.046935947180788085	0.4098903065368873	FALSE	FALSE	FALSE
ENOG411CX25	2	0	3	4	0.42863145307757394	1.937711845609288	0.3913473932337433	2.148051465813235	1	3.5	1.673257393116824	ENOG411CX25	148234336	GenBank	NA	polymerase (RNA) II (DNA directed) polypeptide C, 33kDa [Xenopus laevis]	P19387	POLR2C	NA	Polymerase (RNA) II (DNA directed) polypeptide C, 33kDa	0.04713831810165975	0.4098903065368873	FALSE	FALSE	FALSE
ENOG411CVQ5	0	0	1	2	0.9954389325039961	1.3701428965181228	0.9763098939548995	1.4110858716470287	0	1.5	1.6727189527532162	ENOG411CVQ5	261826170, Xelaev18041289m.g, Xelaev18039579m.g	GenBank, Xenbase_9.1	dicer1.S, dicer1.L	truncated double-stranded RNA-specific endoribonuclease type III [Xenopus laevis], NA	NA	NA	NA	Dicer 1, ribonuclease type III	0.047191318186812686	0.4098903065368873	FALSE	FALSE	FALSE
ENOG411CRRT	0	0	1	2	0.9954389325039961	1.3701428965181228	0.9763098939548995	1.4110858716470287	0	1.5	1.6727189527532162	ENOG411CRRT	147903563, 47940216, Xelaev18018526m.g, Xelaev18036605m.g, Xelaev18020366m.g	GenBank, Xenbase_9.1	add2.L, add3.S, add2.S	adducin 3 (gamma) [Xenopus laevis], LOC432146 protein [Xenopus laevis], NA	Q9UEY8, P35612	ADD3, ADD2	ADDL, ADDB	Adducin 3 (Gamma)	0.047191318186812686	0.4098903065368873	FALSE	FALSE	FALSE
ENOG411CQR3	0	0	1	2	0.9954389325039961	1.3701428965181228	0.9763098939548995	1.4110858716470287	0	1.5	1.6727189527532162	ENOG411CQR3	Xelaev18033362m.g	Xenbase_9.1	otulin.S	NA	Q96BN8	OTULIN	FAM105B	Family with sequence similarity 105, member B	0.047191318186812686	0.4098903065368873	FALSE	FALSE	FALSE
ENOG411DF2X	0	0	1	2	0.9954389325039961	1.3701428965181228	0.9763098939548995	1.4110858716470287	0	1.5	1.6727189527532162	ENOG411DF2X	148231968, Xelaev18003771m.g	GenBank, Xenbase_9.1	irf2bp2.S	interferon regulatory factor 2-binding protein 2 [Xenopus laevis], NA	Q7Z5L9	IRF2BP2	NA	interferon regulatory factor 2 binding protein 2	0.047191318186812686	0.4098903065368873	FALSE	FALSE	FALSE
ENOG411DDPY	0	0	1	2	0.9954389325039961	1.3701428965181228	0.9763098939548995	1.4110858716470287	0	1.5	1.6727189527532162	ENOG411DDPY	147900941, Xelaev18020009m.g	GenBank, Xenbase_9.1	larp1.S	La ribonucleoprotein domain family, member 1 [Xenopus laevis], NA	NA	NA	NA	DM15	0.047191318186812686	0.4098903065368873	FALSE	FALSE	FALSE
ENOG411CTK7	0	0	1	2	0.9954389325039961	1.3701428965181228	0.9763098939548995	1.4110858716470287	0	1.5	1.6727189527532162	ENOG411CTK7	Xelaev18015152m.g, Xelaev18012461m.g	Xenbase_9.1	sfpq.S, sfpq.L	NA	P23246	SFPQ	PSF	splicing factor proline glutamine-rich	0.047191318186812686	0.4098903065368873	FALSE	FALSE	FALSE
ENOG411CYRG	0	0	1	2	0.9954389325039961	1.3701428965181228	0.9763098939548995	1.4110858716470287	0	1.5	1.6727189527532162	ENOG411CYRG	148236135, Xelaev18035338m.g, Xelaev18035330m.g, Xelaev18035328m.g, Xelaev18035348m.g, Xelaev18003872m.g, Xelaev18035331m.g, Xelaev18035325m.g, Xelaev18035317m.g, Xelaev18035349m.g, Xelaev18035345m.g, Xelaev18035320m.g, Xelaev18035344m.g, Xelaev18035347m.g, Xelaev18035342m.g	GenBank, Xenbase_9.1	Xelaev18035338m.g, Xetrov90018408m.L, Xelaev18035328m.g, Xelaev18035348m.g, Xelaev18003872m.g, Xelaev18035331m.g, loc101732086.L, Xelaev18035317m.g, loc100495178.L, Xelaev18035345m.g, loc100487011.L, Xelaev18035344m.g, Xelaev18035347m.g, Xelaev18035342m.g	uncharacterized protein LOC495510 [Xenopus laevis], NA	Q96DL1, Q8N323, Q6UWF7	NXPE2, NXPE1, NXPE4	FAM55B, FAM55A, C11orf33 FAM55D	neurexophilin and PC-esterase domain family, member	0.047191318186812686	0.4098903065368873	FALSE	FALSE	FALSE
ENOG411CR63	0	0	1	2	0.9954389325039961	1.3701428965181228	0.9763098939548995	1.4110858716470287	0	1.5	1.6727189527532162	ENOG411CR63	148233197, Xelaev18011764m.g	GenBank, Xenbase_9.1	asmtl.L	acetylserotonin O-methyltransferase-like [Xenopus laevis], NA	O95671	ASMTL	NA	acetylserotonin O-methyltransferase-like	0.047191318186812686	0.4098903065368873	FALSE	FALSE	FALSE
ENOG411CV3M	0	0	1	2	0.9954389325039961	1.3701428965181228	0.9763098939548995	1.4110858716470287	0	1.5	1.6727189527532162	ENOG411CV3M	116487884, Xelaev18010214m.g	GenBank, Xenbase_9.1	rnf31.S	Rnf31 protein [Xenopus laevis], NA	Q96EP0, A0A0B4J293	RNF31, NA	ZIBRA, NA	ring finger protein 31	0.047191318186812686	0.4098903065368873	FALSE	FALSE	FALSE
ENOG411D12F	0	0	1	2	0.9954389325039961	1.3701428965181228	0.9763098939548995	1.4110858716470287	0	1.5	1.6727189527532162	ENOG411D12F	116487825, 13603484, 229621705, 66911602, 66911607, Xelaev18006108m.g	GenBank, Xenbase_9.1	chaf1a.L	LOC733264 protein [Xenopus laevis], chromatin assembly factor 1 p150 subunit [Xenopus laevis], RecName: Full=Chromatin assembly factor 1 subunit A-B; Short=CAF-1 subunit A; AltName: Full=Chromatin assembly factor I p150 subunit B; Short=CAF-I 150 kDa subunit B; Short=CAF-I p150-B; Short=xp150, Unknown (protein for MGC:115625) [Xenopus laevis], NA	Q13111	CHAF1A	CAF CAF1P150	Chromatin assembly factor 1, subunit A (P150)	0.047191318186812686	0.4098903065368873	FALSE	FALSE	FALSE
ENOG411CTB2	0	0	1	2	0.9954389325039961	1.3701428965181228	0.9763098939548995	1.4110858716470287	0	1.5	1.6727189527532162	ENOG411CTB2	148228943, 148921509, Xelaev18013591m.g, Xelaev18016054m.g, Xelaev18044713m.g, Xelaev18033036m.g, Xelaev18047184m.g	GenBank, Xenbase_9.1	sp7.L, sp7.S, sp9.L, sp8.S, sp9.S	transcription factor Sp8 [Xenopus laevis], LOC100101324 protein [Xenopus laevis], NA	P0CG40, Q8IXZ3, Q8TDD2, F8VV67	SP9, SP8, SP7	NA, OSX	transcription factor	0.047191318186812686	0.4098903065368873	FALSE	FALSE	FALSE
ENOG411CQ0F	33	48	48	63	1.593429682818867	0.762361830884835	0.5035568968197682	0.21141352681066403	40.5	55.5	1.6657961544016089	ENOG411CQ0F	148231869, Xelaev18010984m.g, Xelaev18020610m.g	GenBank, Xenbase_9.1	nnt.S, Xetrov90008802m.S	nicotinamide nucleotide transhydrogenase [Xenopus laevis], NA	Q13423	NNT	NA	Nicotinamide nucleotide transhydrogenase	0.04787701118078636	0.4132514675139279	FALSE	FALSE	FALSE
ENOG411CUEE	5	7	5	21	-0.02930263184605214	2.3845105025584212	-0.023690106045100492	1.2855549895631695	6	13	1.6653834564846455	ENOG411CUEE	117558143, 148232694, 2062660, Xelaev18015737m.g, Xelaev18025680m.g	GenBank, Xenbase_9.1	Xelaev18015737m.g, Xelaev18025680m.g	Unknown (protein for MGC:154793) [Xenopus laevis], RAN GTPase activating protein 1 [Xenopus laevis], RanGTPase activating protein [Xenopus laevis], NA	P46060	RANGAP1	KIAA1835 SD	RAN GTPase activating protein 1	0.04791813891403276	0.4132514675139279	FALSE	FALSE	FALSE
ENOG411CQT7	41	53	55	72	1.3471299844460374	1.00481482847874	0.3913473932337433	0.26106042764242104	47	63.5	1.663076126195636	ENOG411CQT7	148233902, Xelaev18026709m.g	GenBank, Xenbase_9.1	mthfd1l.L	methylenetetrahydrofolate dehydrogenase (NADP+ dependent) 1, methenyltetrahydrofolate cyclohydrolase, formyltetrahydrofolate synthetase [Xenopus laevis], NA	P11586, Q6UB35	MTHFD1, MTHFD1L	MTHFC MTHFD, FTHFSDC1	Methylenetetrahydrofolate dehydrogenase (NADP dependent)	0.04814859904416996	0.4137717062735737	FALSE	FALSE	FALSE
ENOG411D0MK	5	7	10	13	1.261503916493127	1.0877659947181482	0.8507790118710405	0.6334782929834764	6	11.5	1.6611846850550107	ENOG411D0MK	117667938, 117667940, 147904786, Xelaev18000741m.g, Xelaev18004428m.g	GenBank, Xenbase_9.1	carm1.S, carm1.L	coactivator-associated arginine methyltransferase 1-a [Xenopus laevis], coactivator-associated arginine methyltransferase 1-b [Xenopus laevis], histone-arginine methyltransferase CARM1 [Xenopus laevis], NA	Q86X55	CARM1	PRMT4	Coactivator-associated arginine methyltransferase 1	0.04833818022215365	0.4139382193671749	FALSE	FALSE	FALSE
ENOG411D0AM	7	11	9	24	0.46541892607500884	1.8773851212182942	0.298237988842262	0.8850170599794408	9	16.5	1.6566126288323835	ENOG411D0AM	Xelaev18033597m.g, Xelaev18031837m.g	Xenbase_9.1	ndufv2.S, ndufv2.L	NA	P19404	NDUFV2	NA	NADH dehydrogenase ubiquinone flavoprotein 2	0.04879890872459537	0.41558032449770593	FALSE	FALSE	FALSE
ENOG411CVFB	21	69	38	81	2.154718519376472	0.18555814933179343	0.8022804941798505	0.054392358598989506	45	59.5	1.6548255022962777	ENOG411CVFB	147903260, 148237470, Xelaev18013281m.g, Xelaev18023027m.g	GenBank, Xenbase_9.1	sucla2.L, Xelaev18023027m.g	succinate-CoA ligase, ADP-forming, beta subunit [Xenopus laevis], succinate-CoA ligase, GDP-forming, beta subunit [Xenopus laevis], NA	Q96I99, Q9P2R7	SUCLG2, SUCLA2	NA	beta subunit	0.048979949667284264	0.41558032449770593	FALSE	FALSE	FALSE
ENOG411CVVF	9	17	16	26	1.3608519240261499	0.9785521547998525	0.7418446403178767	0.41108587164702887	13	21	1.6542084880733345	ENOG411CVVF	148235541, Xelaev18003090m.g, Xelaev18046585m.g	GenBank, Xenbase_9.1	rpn2.L, rpn2.S	ribophorin II precursor [Xenopus laevis], NA	P04844	RPN2	NA	Ribophorin II	0.049042579412352634	0.41558032449770593	FALSE	FALSE	FALSE
ENOG411CSVZ	4	4	8	9	1.1282621718377197	1.1932226486344832	0.8243068005098495	0.8261233709258724	4	8.5	1.6415376589775295	ENOG411CSVZ	113817461, Xelaev18043759m.g, Xelaev18002050m.g	GenBank, Xenbase_9.1	hgs.L, hgs.S	MGC68804 protein [Xenopus laevis], NA	O14964	HGS	HRS	Hepatocyte growth factor-regulated tyrosine kinase substrate	0.05034292821629884	0.42511806049319023	FALSE	FALSE	FALSE
ENOG411CPNJ	0	1	2	3	1.407788694550312	0.9010527153641567	1.561272394676056	0.8261233709258723	0.5	2.5	1.63259741763483	ENOG411CPNJ	148222733, 148230753, 148233900, Xelaev18006196m.g, Xelaev18019022m.g	GenBank, Xenbase_9.1	ap1m1.L, ap1m2.L	adaptor-related protein complex 1, mu 2 subunit [Xenopus laevis], uncharacterized protein LOC431991 [Xenopus laevis], adaptor-related protein complex 1, mu 1 subunit [Xenopus laevis], NA	Q9BXS5, Q9Y6Q5	AP1M1, AP1M2	CLTNM, NA	Adaptor-related protein complex 1 mu	0.05127684735837107	0.4315062033756347	FALSE	FALSE	FALSE
ENOG411CPEW	10	21	15	34	0.9587959158305138	1.3149816640531522	0.516878275317602	0.49597476923354156	15.5	24.5	1.6078035456456767	ENOG411CPEW	114108131, 148225841	GenBank	NA	MGC154791 protein [Xenopus laevis], uncharacterized protein LOC432270 [Xenopus laevis]	Q02978	SLC25A11	SLC20A4	solute carrier family 25 (mitochondrial carrier)	0.05393910583488508	0.44917875819151143	FALSE	FALSE	FALSE
ENOG411CRH0	32	44	41	64	0.9804438951803434	1.2917092781886594	0.3242331973752063	0.35663808762465204	38	52.5	1.6066549167837552	ENOG411CRH0	34785887, Xelaev18026157m.g, Xelaev18028741m.g	GenBank, Xenbase_9.1	lrpprc.L, lrpprc.S	LOC398720 protein [Xenopus laevis], NA	P42704	LRPPRC	LRP130	leucine-rich pentatricopeptide repeat containing	0.05406504423117022	0.44917875819151143	FALSE	FALSE	FALSE
ENOG411D145	0	2	1	6	0.9954389325039961	1.2743298740759423	0.9763098939548995	1.04851579226232	1	3.5	1.6049689148583715	ENOG411D145	Xelaev18026910m.g	Xenbase_9.1	tarbp1.L	NA	Q13395	TARBP1	TRM3 TRP185	Tar (HIV-1) RNA binding protein 1	0.05425032289446035	0.44917875819151143	FALSE	FALSE	FALSE
ENOG411CTY3	0	2	1	6	0.9954389325039961	1.2743298740759423	0.9763098939548995	1.04851579226232	1	3.5	1.6049689148583715	ENOG411CTY3	147903337, 148226530, 54311494, Xelaev18041117m.g, Xelaev18039823m.g	GenBank, Xenbase_9.1	actr10.S, actr10.L	MGC82862 protein [Xenopus laevis], actin-related protein 10 homolog [Xenopus laevis], LOC495357 protein [Xenopus laevis], NA	Q9NZ32	ACTR10	ACTR11 ARP11	Actin-related protein 10 homolog (S. cerevisiae)	0.05425032289446035	0.44917875819151143	FALSE	FALSE	FALSE
ENOG411CZZ8	2	10	6	16	1.394837396380582	0.8742881645109322	1.1987023152913476	0.45415459353891435	6	11	1.6045140714701178	ENOG411CZZ8	148223905, 148224598, Xelaev18021938m.g	GenBank, Xenbase_9.1	ndufs3.L	NADH dehydrogenase (ubiquinone) Fe-S protein 3, 30kDa (NADH-coenzyme Q reductase) [Xenopus laevis], uncharacterized protein LOC495365 [Xenopus laevis], NA	O75489	NDUFS3	NA	NADH dehydrogenase (ubiquinone) Fe-S protein 3, 30kDa (NADH-coenzyme Q reductase)	0.05430039264321725	0.44917875819151143	FALSE	FALSE	FALSE
ENOG411CZY6	47	83	58	113	0.9854584770949147	1.274517356853111	0.27399044259558464	0.2666959623118538	65	85.5	1.5980442375023718	ENOG411CZY6	147903625, 148222432, 38051919	GenBank	NA	uncharacterized protein LOC398959 [Xenopus laevis], chaperonin containing TCP1, subunit 4 (delta) [Xenopus laevis], LOC398959 protein [Xenopus laevis]	P50991	CCT4	CCTD SRB	chaperonin containing TCP1, subunit 4 (delta)	0.05501656614229459	0.45356030121376417	FALSE	FALSE	FALSE
ENOG411CV9A	36	53	42	80	0.601575458039388	1.647118162958966	0.19312128302804776	0.41108587164702864	44.5	61	1.590066508218868	ENOG411CV9A	147906871, 148222822, Xelaev18038127m.g, Xelaev18038126m.g, Xelaev18017690m.g	GenBank, Xenbase_9.1	Xelaev18038127m.g, Xelaev18038126m.g, hdac10.L	histone deacetylase 10 [Xenopus laevis], histone deacetylase 6 [Xenopus laevis], NA	Q9UBN7, Q969S8	HDAC6, HDAC10	KIAA0901, NA	Histone deacetylase	0.055909907159753566	0.45936788585311034	FALSE	FALSE	FALSE
ENOG411CV7X	1	0	2	3	0.5640392668774026	1.6780915843162603	0.5612723946760559	1.8261233709258722	0.5	2.5	1.5854259291866046	ENOG411CV7X	147902192, Xelaev18031714m.g, Xelaev18033499m.g	GenBank, Xenbase_9.1	cdkal1.L, cdkal1.S	CDK5 regulatory subunit-associated protein 1-like 1 [Xenopus laevis], NA	Q5VV42	CDKAL1	NA	CDK5 regulatory subunit associated protein 1-like 1	0.056434796905736065	0.46084249395220833	FALSE	FALSE	FALSE
ENOG411CT39	2	5	8	7	1.8772989644807334	0.3636661400875426	1.5612723946760556	0.241160870204716	3.5	7.5	1.5846016218426484	ENOG411CT39	147902326, 148236509, 155369243, 213623606, Xelaev18027641m.g	GenBank, Xenbase_9.1	kpna4.L	karyopherin alpha 3 (importin alpha 4) [Xenopus laevis], karyopherin alpha 4 (importin alpha 3) [Xenopus laevis], importin alpha 4 protein [Xenopus laevis], Importin alpha 4 protein [Xenopus laevis], NA	O00629, O00505	KPNA4, KPNA3	QIP1, QIP2	Importin subunit alpha	0.05652843812150075	0.46084249395220833	FALSE	FALSE	FALSE
ENOG411CQ5M	0	1	1	4	0.9954389325039961	1.2392234788223713	0.9763098939548995	1.1480514658132348	0.5	2.5	1.580144944711556	ENOG411CQ5M	148223363, 213623628, 509579, Xelaev18018069m.g, Xelaev18020753m.g, Xelaev18009643m.g	GenBank, Xenbase_9.1	csk.L, csk.S, matk.S	c-src tyrosine kinase [Xenopus laevis], C-src tyrosine kinase [Xenopus laevis], putative protein-tyrosine kinase [Xenopus laevis], NA	P42679, P41240	MATK, CSK	CTK HYL, NA	Tyrosine kinase	0.057036838272867894	0.46084249395220833	FALSE	FALSE	FALSE
ENOG411CWFZ	0	1	1	4	0.9954389325039961	1.2392234788223713	0.9763098939548995	1.1480514658132348	0.5	2.5	1.580144944711556	ENOG411CWFZ	148225695, Xelaev18018789m.g	GenBank, Xenbase_9.1	ap3m2.L	adaptor-related protein complex 3, mu 2 subunit [Xenopus laevis], NA	Q9Y2T2, P53677	AP3M1, AP3M2	NA	adaptor-related protein complex 3, mu	0.057036838272867894	0.46084249395220833	FALSE	FALSE	FALSE
ENOG411CWH3	0	1	1	4	0.9954389325039961	1.2392234788223713	0.9763098939548995	1.1480514658132348	0.5	2.5	1.580144944711556	ENOG411CWH3	110287969, 147903310, 49119081, 58402642, 83405638, Xelaev18007309m.g	GenBank, Xenbase_9.1	supt16h.L	RecName: Full=FACT complex subunit SPT16; AltName: Full=DNA unwinding factor 140 kDa subunit; Short=DUF140; AltName: Full=Facilitates chromatin transcription complex subunit spt16, FACT complex subunit SPT16 [Xenopus laevis], Unknown (protein for IMAGE:5048405) [Xenopus laevis], LOC733160 protein [Xenopus laevis], Unknown (protein for MGC:132046) [Xenopus laevis], NA	Q9Y5B9	SUPT16H	FACT140 FACTP140	suppressor of Ty 16 homolog (S. cerevisiae)	0.057036838272867894	0.46084249395220833	FALSE	FALSE	FALSE
ENOG411CX6V	1	1	3	4	0.9862276347740007	1.2392234788223713	0.9763098939548995	1.1480514658132348	1	3.5	1.573631573623148	ENOG411CX6V	148232288, Xelaev18031302m.g	GenBank, Xenbase_9.1	lztfl1.L	leucine zipper transcription factor-like 1 [Xenopus laevis], NA	Q9NQ48	LZTFL1	NA	Leucine zipper transcription factor-like 1	0.05778632472170094	0.4653521249111811	FALSE	FALSE	FALSE
ENOG411CZG9	7	9	9	20	0.46541892607500884	1.7528194542452022	0.298237988842262	0.8965126988172704	8	14.5	1.5685314010126852	ENOG411CZG9	147904796, 148224323, Xelaev18022777m.g	GenBank, Xenbase_9.1	vps35.L	vacuolar protein sorting 35 homolog [Xenopus laevis], vacuolar protein sorting 35 [Xenopus laevis], NA	Q96QK1	VPS35	MEM3	vacuolar protein sorting 35 homolog (S. cerevisiae)	0.05837858381787779	0.46857001929068903	FALSE	FALSE	FALSE
ENOG411CW6S	3	2	5	7	0.6843146368825122	1.5244287218181611	0.5612723946760559	1.241160870204716	2.5	6	1.5618174068379969	ENOG411CW6S	147902304, 148230887, 148235999, Xelaev18039542m.g, Xelaev18026540m.g	GenBank, Xenbase_9.1	loc100485426-like.L, smek2.L	serine/threonine-protein phosphatase 4 regulatory subunit 3-B [Xenopus laevis], serine/threonine-protein phosphatase 4 regulatory subunit 3-A [Xenopus laevis], serine/threonine-protein phosphatase 4 regulatory subunit 3 [Xenopus laevis], NA	Q6IN85, Q5MIZ7	PPP4R3A, PPP4R3B	KIAA2010 PP4R3A SMEK1, KIAA1387 PP4R3B SMEK2	suppressor of mek1 (Dictyostelium)	0.05916550495965567	0.4709853266464978	FALSE	FALSE	FALSE
ENOG411CPN1	8	16	11	29	0.6513122333417994	1.5547421755088253	0.3913473932337433	0.6455511252840516	12	20	1.5599160321647572	ENOG411CPN1	148236241, Xelaev18009395m.g, Xelaev18005697m.g	GenBank, Xenbase_9.1	aimp1.S, aimp1.L	aminoacyl tRNA synthetase complex-interacting multifunctional protein 1 [Xenopus laevis], NA	Q12904	AIMP1	EMAP2 SCYE1	Aminoacyl tRNA synthetase complex-interacting multifunctional protein 1	0.05938986265689606	0.4709853266464978	FALSE	FALSE	FALSE
ENOG411CPDS	0	1	3	2	1.7242131620693701	0.48107221241408954	1.9763098939548995	0.41108587164702864	0.5	2.5	1.559372242748769	ENOG411CPDS	148233008, Xelaev18039995m.g	GenBank, Xenbase_9.1	dph6.L	ATP binding domain 4 [Xenopus laevis], NA	Q7L8W6	DPH6	ATPBD4	ATP binding domain 4	0.05945415101993208	0.4709853266464978	FALSE	FALSE	FALSE
ENOG411CW4W	0	1	3	2	1.7242131620693701	0.48107221241408954	1.9763098939548995	0.41108587164702864	0.5	2.5	1.559372242748769	ENOG411CW4W	120538435, 54038705, Xelaev18009951m.g, Xelaev18020553m.g, Xelaev18018304m.g	GenBank, Xenbase_9.1	fkbp8.S, loc100492768.S, loc100492768.L	LOC495188 protein [Xenopus laevis], NA	Q14318	FKBP8	FKBP38	FK506 binding protein 8, 38kDa	0.05945415101993208	0.4709853266464978	FALSE	FALSE	FALSE
ENOG411CUF1	4	17	9	25	1.3601638513086796	0.8405713047897541	0.9763098939548996	0.35663808762465204	10.5	17	1.5561547524728374	ENOG411CUF1	148226779, 148227269, 148229128, 66911555, Xelaev18040094m.g, Xelaev18040095m.g, Xelaev18024204m.g, Xelaev18022251m.g, Xelaev18002694m.g, Xelaev18002696m.g	GenBank, Xenbase_9.1	Xelaev18040094m.g, mta1.L, mta2.S, mta2.L, Xelaev18002694m.g, mta1.S	uncharacterized protein LOC734243 [Xenopus laevis], metastasis associated 1 family, member 2 [Xenopus laevis], metastasis associated 1 [Xenopus laevis], Mta2 protein [Xenopus laevis], NA	Q13330, O94776, Q9BTC8	MTA1, MTA2, MTA3	NA, MTA1L1 PID, KIAA1266	Metastasis associated 1	0.05983564895656231	0.4712358646954558	FALSE	FALSE	FALSE
ENOG411CWRS	4	6	5	16	0.30715128444444906	1.8924662942534223	0.23934429978869357	1.1062312901186073	5	10.5	1.555364505914399	ENOG411CWRS	Xelaev18017693m.g	Xenbase_9.1	selo.L	NA	Q9BVL4	SELENOO	SELO	selenoprotein	0.059929641221209584	0.4712358646954558	FALSE	FALSE	FALSE
ENOG411CTBI	17	33	25	47	1.1810663751925725	1.0169196113633212	0.5068246106536793	0.3236230303966891	25	36	1.5542107960466762	ENOG411CTBI	148229707, 148237169, Xelaev18031324m.g, Xelaev18033323m.g	GenBank, Xenbase_9.1	sdha.L, sdha.S	succinate dehydrogenase [ubiquinone] flavoprotein subunit B, mitochondrial precursor [Xenopus laevis], succinate dehydrogenase [ubiquinone] flavoprotein subunit A, mitochondrial precursor [Xenopus laevis], NA	P31040	SDHA	SDH2 SDHF	succinate dehydrogenase complex, subunit A, flavoprotein (Fp)	0.0600670715689109	0.4712358646954558	FALSE	FALSE	FALSE
ENOG411CQBX	2	2	3	8	0.42863145307757394	1.7526107251628225	0.3913473932337433	1.4110858716470283	2	5.5	1.5423711356439	ENOG411CQBX	147905450, 148233493, 1709571, 1709573, 1709575, 213625101, 755872, Xelaev18026530m.g, Xelaev18039591m.g, Xelaev18041275m.g	GenBank, Xenbase_9.1	papolg.L, papola.L, papola.S	poly(A) polymerase gamma [Xenopus laevis], poly(A) polymerase alpha-B [Xenopus laevis], RecName: Full=Poly(A) polymerase alpha-A; Short=PAP-alpha-A; AltName: Full=Polynucleotide adenylyltransferase alpha-A, RecName: Full=Poly(A) polymerase alpha-B; Short=PAP-alpha-B; AltName: Full=Polynucleotide adenylyltransferase alpha-B, RecName: Full=Poly(A) polymerase type 3; Short=PAP; AltName: Full=Polynuc…	Q9BWT3, P51003	PAPOLG, PAPOLA	PAP2 PAPG, PAP	PolyA polymerase	0.06149171579520548	0.4808612630673303	FALSE	FALSE	FALSE
ENOG411CQ1P	0	0	0	5	0	2.1664484883645816	0	2.4110858716470287	0	2.5	1.5319104172139408	ENOG411CQ1P	114108120, 116487694, 284925122, 33305500, 47507264, 54035254, 56474875, 77748230, Xelaev18006846m.g, Xelaev18003798m.g, Xelaev18000745m.g, Xelaev18004432m.g	GenBank, Xenbase_9.1	smarca2-like.L, smarca2-like.S, smarca4.S, smarca4.L	LOC432089 protein [Xenopus laevis], Unknown (protein for IMAGE:5078610) [Xenopus laevis], SWI/SNF related, matrix associated, actin dependent regulator of chromatin, subfamily a, member 4 [Xenopus laevis], BRM protein [Xenopus laevis], Unknown (protein for IMAGE:4202564) [Xenopus laevis], Brg1 [Xenopus laevis], Unknown (protein for IMAGE:7974916) [Xenopus laevis], NA	P51532, P51531	SMARCA4, SMARCA2	BAF190A BRG1 SNF2B SNF2L4, BAF190B BRM SNF2A SNF2L2	SWI SNF related matrix associated actin dependent regulator of chromatin subfamily a member	0.06277227125518284	0.48464178950033227	FALSE	FALSE	FALSE
ENOG411CV0Q	0	0	0	5	0	2.1664484883645816	0	2.4110858716470287	0	2.5	1.5319104172139408	ENOG411CV0Q	148222989, 148236478, 46249466, Xelaev18018580m.g, Xelaev18020309m.g	GenBank, Xenbase_9.1	ncaph.L, ncaph.S	condensin complex subunit 2 [Xenopus laevis], barren homolog [Xenopus laevis], LOC398069 protein [Xenopus laevis], NA	Q15003	NCAPH	BRRN BRRN1 CAPH KIAA0074	Regulatory subunit of the condensin complex, a complex required for conversion of interphase chromatin into mitotic-like condense chromosomes. The condensin complex probably introduces positive supercoils into relaxed DNA in the presence of type I topoisomerases and converts nicked DNA into positive knotted forms in the presence of type II topoisomerases (By similarity)	0.06277227125518284	0.48464178950033227	FALSE	FALSE	FALSE
ENOG411CV66	0	0	0	5	0	2.1664484883645816	0	2.4110858716470287	0	2.5	1.5319104172139408	ENOG411CV66	148222997, Xelaev18043727m.g	GenBank, Xenbase_9.1	rptor.L	regulatory associated protein of MTOR, complex 1 [Xenopus laevis], NA	Q8N122	RPTOR	KIAA1303 RAPTOR	regulatory associated protein of MTOR, complex 1	0.06277227125518284	0.48464178950033227	FALSE	FALSE	FALSE
ENOG411CWXV	0	0	0	5	0	2.1664484883645816	0	2.4110858716470287	0	2.5	1.5319104172139408	ENOG411CWXV	148225460, 189441694, 27469849, 78101115, 83405093, Xelaev18021366m.g, Xelaev18017314m.g	GenBank, Xenbase_9.1	znf346.S, znf346.L	zinc finger protein 346 [Xenopus laevis], Jaz protein [Xenopus laevis], Chain A, Solution Structure Of The N-Terminal Zinc Fingers Of The Xenopus Laevis Double Stranded Rna Binding Protein Zfa, NA	Q9UL40	ZNF346	JAZ	Zinc finger protein 346	0.06277227125518284	0.48464178950033227	FALSE	FALSE	FALSE
ENOG411D1N4	2	9	6	14	1.394837396380582	0.7557568695373671	1.1987023152913476	0.41108587164702864	5.5	10	1.5206997890114868	ENOG411D1N4	115292025, 122936362, 77748380	GenBank	NA	LOC733390 protein [Xenopus laevis]	Q9BZE1	MRPL37	MRPL2 RPML2	mitochondrial ribosomal protein L37	0.06416759584687617	0.49384681360633814	FALSE	FALSE	FALSE
ENOG411CPDN	3	7	5	15	0.6843146368825122	1.4503570021555736	0.5612723946760559	0.8261233709258723	5	10	1.5094407915704322	ENOG411CPDN	147898917, 148225254, Xelaev18012670m.g	GenBank, Xenbase_9.1	aldh3a2.L	aldehyde dehydrogenase 3 family, member A2 [Xenopus laevis], uncharacterized protein LOC496316 [Xenopus laevis], NA	P51648, P30838	ALDH3A2, ALDH3A1	ALDH10 FALDH, ALDH3	Aldehyde dehydrogenase 3 family member	0.0655930876773275	0.5032252026222728	FALSE	FALSE	FALSE
ENOG411CQD2	6	9	11	15	1.180524083183596	0.9376563618315544	0.7539174726184517	0.50419527603851	7.5	13	1.4977797564469515	ENOG411CQD2	148226320, Xelaev18034833m.g, Xelaev18017162m.g, Xelaev18021484m.g, Xelaev18037093m.g	GenBank, Xenbase_9.1	p4ha1-like.1.L, p4ha2.L, p4ha2.S, p4ha1-like.1.S	prolyl 4-hydroxylase, alpha polypeptide 2 precursor [Xenopus laevis], NA	P13674, O15460	P4HA1, P4HA2	P4HA, NA	Prolyl 4-hydroxylase, alpha polypeptide	0.0670952410117489	0.5131308998131237	FALSE	FALSE	FALSE
ENOG411CQA0	16	29	23	42	1.0690456367091243	1.0287159283639054	0.4738095534257164	0.3454975300194518	22.5	32.5	1.483341427975644	ENOG411CQA0	147901713, 148229675, Xelaev18005996m.g, Xelaev18037117m.g	GenBank, Xenbase_9.1	sec31a.L, sec31b.S	MGC86445 protein [Xenopus laevis], SEC31 homolog B [Xenopus laevis], NA	O94979, Q9NQW1	SEC31A, SEC31B	KIAA0905 SEC31L1, SEC31L2	SEC31 homolog B (S. cerevisiae)	0.06899186035701957	0.5198513809572728	FALSE	FALSE	FALSE
ENOG411CVDK	13	24	19	36	1.0138080581779187	1.0813651548977876	0.49088306678465793	0.3917205467800974	18.5	27.5	1.4815111867262392	ENOG411CVDK	1002598, 109940097, 148236609, 311819824, 64613, Xelaev18033701m.g	GenBank, Xenbase_9.1	mcm4.S	Cdc21 [Xenopus laevis], RecName: Full=DNA replication licensing factor mcm4-B; AltName: Full=CDC21 homolog-B; AltName: Full=Minichromosome maintenance protein 4-B; Short=xMCM4-B; AltName: Full=P1-CDC21-B, DNA replication licensing factor mcm4-A [Xenopus laevis], unnamed protein product [Xenopus laevis], S.pombe cdc21+ homologue [Xenopus laevis], NA	P33991	MCM4	CDC21	Minichromosome maintenance complex component 4	0.06923520307773365	0.5198513809572728	FALSE	FALSE	FALSE
ENOG411D7QW	65	200	117	194	3.7599638893011886	-1.66545517225572	0.8145588239582872	-0.21759800650344557	132.5	155.5	1.4810413170771863	ENOG411D7QW	147907262, 148231702, 54648594, Xelaev18017873m.g	GenBank, Xenbase_9.1	MGC97820.L	tubulin, alpha 3d [Xenopus laevis], tubulin, alpha 1a [Xenopus laevis], LOC397931 protein [Xenopus laevis], NA	NA	NA	NA	Tubulin is the major constituent of microtubules. It binds two moles of GTP, one at an exchangeable site on the beta chain and one at a non-exchangeable site on the alpha chain (By similarity)	0.06929778191288741	0.5198513809572728	FALSE	FALSE	FALSE
ENOG411CT3E	1	6	4	10	1.3273307913105068	0.7655344381552881	1.298237988842262	0.4782000675055653	3.5	7	1.4798791958648034	ENOG411CT3E	114107981, 148235651, 213626071, 27881713, 33416654, Xelaev18027647m.g	GenBank, Xenbase_9.1	smc4.L	Unknown (protein for IMAGE:8329210) [Xenopus laevis], structural maintenance of chromosomes protein 4 [Xenopus laevis], (XCAP-C) [Xenopus laevis], XCAP-C protein [Xenopus laevis], NA	Q9NTJ3	SMC4	CAPC SMC4L1	Structural maintenance of chromosomes	0.06945274431088382	0.5198513809572728	FALSE	FALSE	FALSE
ENOG411CQPU	0	3	1	7	0.9954389325039961	1.0969321796323708	0.9763098939548995	0.8261233709258723	1.5	4	1.479529802150463	ENOG411CQPU	147901420	GenBank	NA	polymerase (RNA) I polypeptide C, 30kDa [Xenopus laevis]	O15160	POLR1C	POLR1E	Polymerase (RNA) I polypeptide C, 30kDa	0.06949938615955668	0.5198513809572728	FALSE	FALSE	FALSE
ENOG411CTXS	1	2	2	7	0.5640392668774026	1.5244287218181611	0.5612723946760559	1.241160870204716	1.5	4.5	1.476769877097663	ENOG411CTXS	Xelaev18012483m.g, Xelaev18015169m.g	Xenbase_9.1	mecr.L, mecr.S	NA	Q9BV79	MECR	NBRF1	Mitochondrial trans-2-enoyl-CoA reductase	0.06986866690120475	0.5198513809572728	FALSE	FALSE	FALSE
ENOG411CRGD	47	75	64	93	1.5265871002761422	0.561694233687778	0.4137152062621979	0.13278470915992416	61	78.5	1.4766378922711774	ENOG411CRGD	116487892, 148224889, 72679364, Xelaev18041381m.g, Xelaev18039438m.g	GenBank, Xenbase_9.1	aldh6a1.S, aldh6a1.L	Unknown (protein for MGC:154911) [Xenopus laevis], aldehyde dehydrogenase 6 family, member A1 [Xenopus laevis], LOC734217 protein [Xenopus laevis], NA	Q02252	ALDH6A1	MMSDH	aldehyde dehydrogenase 6 family, member A1	0.06988636436341315	0.5198513809572728	FALSE	FALSE	FALSE
ENOG411D142	0	2	2	4	1.407788694550312	0.6803584288480714	1.561272394676056	0.5630889650920785	1	3	1.476542991070179	ENOG411D142	Xelaev18019904m.g	Xenbase_9.1	Xetrov90007272m.S	NA	Q70UQ0	IKBIP	IKIP	IKBKB interacting protein	0.0698990915217502	0.5198513809572728	FALSE	FALSE	FALSE
ENOG411CR51	0	5	3	7	1.7242131620693701	0.3636661400875426	1.9763098939548995	0.241160870204716	2.5	5	1.4763536128541896	ENOG411CR51	56789608, Xelaev18038342m.g	GenBank, Xenbase_9.1	psmd5.L	LOC496243 protein [Xenopus laevis], NA	Q16401	PSMD5	KIAA0072	proteasome (prosome, macropain) 26S subunit, non-ATPase, 5	0.0699244942818284	0.5198513809572728	FALSE	FALSE	FALSE
ENOG411CRI6	2	7	6	11	1.394837396380582	0.689799609831477	1.1987023152913476	0.41108587164702864	4.5	8.5	1.47406096340497	ENOG411CRI6	120537910	GenBank	NA	RFC2 protein [Xenopus laevis]	P35249	RFC4	NA	Replication factor C (Activator 1) 4, 37kDa	0.07023258887158752	0.5198513809572728	FALSE	FALSE	FALSE
ENOG411CX3C	2	0	5	1	1.11483555352971	0.9688280389827452	0.9763098939548995	0.8261233709258723	1	3	1.4733726559770801	ENOG411CX3C	147904080, Xelaev18006663m.g	GenBank, Xenbase_9.1	cope.L	coatomer protein complex, subunit epsilon [Xenopus laevis], NA	O14579	COPE	NA	Coatomer protein complex, subunit epsilon	0.07032528961140738	0.5198513809572728	FALSE	FALSE	FALSE
ENOG411CZH5	3	8	7	13	1.2417650990384717	0.8205083423974397	0.9763098939548995	0.46355329154116426	5.5	10	1.458247535100251	ENOG411CZH5	115528650, 132173, 147900380, 2134146, 47682592, 48735020, Xelaev18015101m.g	GenBank, Xenbase_9.1	rcc1.S	Chc1-a protein [Xenopus laevis], RecName: Full=Regulator of chromosome condensation, regulator of chromosome condensation 1 [Xenopus laevis], RCC1 protein - African clawed frog (fragment), Chc1-a-prov protein [Xenopus laevis], Chc1-b-prov protein [Xenopus laevis], NA	P18754	RCC1	CHC1	Regulator of chromosome condensation 1	0.07238616284493235	0.5334640849662894	FALSE	FALSE	FALSE
ENOG411CXVJ	4	7	6	15	0.6062312335962097	1.4503570021555736	0.46173672112514147	0.8261233709258723	5.5	10.5	1.4542274876085637	ENOG411CXVJ	Xelaev18034105m.g	Xenbase_9.1	mroh1.S	NA	A6NES4, Q8NDA8, Q7Z745	MROH2A, MROH1, MROH2B	HEATR7B1, HEATR7A KIAA1833, HEATR7B2	HEAT repeat	0.07294162327416895	0.5359336187395133	FALSE	FALSE	FALSE
ENOG411CRFF	7	28	9	46	0.46541892607500884	1.5869660351414014	0.298237988842262	0.5227312274759377	17.5	27.5	1.451255323681413	ENOG411CRFF	117558233, 148225023, 171846414, 49117032, 6273357, Xelaev18018997m.g, Xelaev18021625m.g	GenBank, Xenbase_9.1	dnmt1.L, dnmt1.S	LOC100036795 protein [Xenopus laevis], DNA (cytosine-5-)-methyltransferase 1 [Xenopus laevis], Dnmt1 protein [Xenopus laevis], DNA methyltransferase 1 [Xenopus laevis], NA	P26358	DNMT1	AIM CXXC9 DNMT	DNA (Cytosine-5)-methyltransferase 1	0.07335438836391917	0.5373429894609982	FALSE	FALSE	FALSE
ENOG411CQQF	8	15	7	34	-0.2953705763416439	2.340177137366766	-0.19361510748741312	0.9554063878708388	11.5	20.5	1.4458965855156078	ENOG411CQQF	123895418, 148225368, Xelaev18024927m.g	GenBank, Xenbase_9.1	usp10.S	RecName: Full=Ubiquitin carboxyl-terminal hydrolase 10-A; AltName: Full=Deubiquitinating enzyme 10-A; AltName: Full=Ubiquitin thiolesterase 10-A; AltName: Full=Ubiquitin-specific-processing protease 10-A, ubiquitin carboxyl-terminal hydrolase 10-B [Xenopus laevis], NA	Q14694	USP10	KIAA0190	ubiquitin specific peptidase 10	0.07410310489027912	0.5403137706168019	FALSE	FALSE	FALSE
ENOG411CQUN	1	10	3	17	0.9862276347740007	1.0444506890072933	0.9763098939548995	0.5366167537308875	5.5	10	1.4359064131542847	ENOG411CQUN	148227774, 3068759, Xelaev18036728m.g, Xelaev18000914m.g, Xelaev18019318m.g	GenBank, Xenbase_9.1	chd4.S, chd3.S, chd3.L	chromodomain helicase DNA binding protein 4 [Xenopus laevis], Mi-2 [Xenopus laevis], NA	Q14839, Q12873	CHD4, CHD3	NA	Chromodomain helicase DNA binding protein	0.07551448668760427	0.5403137706168019	FALSE	FALSE	FALSE
ENOG411CVYY	41	72	52	95	1.0584278819057626	0.9703471783560614	0.3119129257393385	0.22126131276701116	56.5	73.5	1.4345606026132822	ENOG411CVYY	147900486, Xelaev18023938m.g, Xelaev18021187m.g, Xelaev18017531m.g	GenBank, Xenbase_9.1	loc100492789-like.L, cand1.S, cand1.L	cullin-associated and neddylation-dissociated 1 [Xenopus laevis], NA	Q86VP6, O75155	CAND1, CAND2	KIAA0829 TIP120 TIP120A, KIAA0667 TIP120B	cullin-associated and neddylation-dissociated	0.07570617404136078	0.5403137706168019	FALSE	FALSE	FALSE
ENOG411CZMR	0	5	2	8	1.407788694550312	0.6181379683056818	1.561272394676056	0.41108587164702837	2.5	5	1.4325464814921056	ENOG411CZMR	148225184	GenBank	NA	ATP synthase, H+ transporting, mitochondrial Fo complex, subunit s (factor B) [Xenopus laevis]	Q99766	DMAC2L	ATP5S ATPW	ATP synthase, H transporting, mitochondrial Fo complex, subunit s (factor B)	0.07599374279572128	0.5403137706168019	FALSE	FALSE	FALSE
ENOG411CYVX	1	11	2	21	0.5640392668774026	1.4494082913814115	0.5612723946760559	0.7005924888420134	6	11.5	1.4237224220083036	ENOG411CYVX	148225618, 148233489, Xelaev18007794m.g, Xelaev18010617m.g	GenBank, Xenbase_9.1	hip1r.L, hip1r.S	huntingtin interacting protein 1 related [Xenopus laevis], uncharacterized protein LOC432028 [Xenopus laevis], NA	O75146	HIP1R	HIP12 KIAA0655	Huntingtin interacting protein 1 related	0.0772634202007409	0.5403137706168019	FALSE	FALSE	FALSE
ENOG411CUY5	2	5	6	8	1.394837396380582	0.6181379683056818	1.1987023152913476	0.41108587164702837	3.5	7	1.4233885307311205	ENOG411CUY5	148226057, Xelaev18036929m.g	GenBank, Xenbase_9.1	actr1a.S	ARP1 actin-related protein 1 homolog A, centractin alpha [Xenopus laevis], NA	P61163, P42025	ACTR1A, ACTR1B	CTRN1, CTRN2	ARP1 actin-related protein 1 homolog	0.07731177772338124	0.5403137706168019	FALSE	FALSE	FALSE
ENOG411CU8V	2	7	5	12	1.11483555352971	0.8937108668989081	0.9763098939548995	0.5265630890669644	4.5	8.5	1.420256794213042	ENOG411CU8V	147900237, Xelaev18041372m.g, Xelaev18039450m.g	GenBank, Xenbase_9.1	eif2b2.S, eif2b2.L	eukaryotic translation initiation factor 2B, subunit 2 beta, 39kDa [Xenopus laevis], NA	P49770	EIF2B2	EIF2BB	Eukaryotic translation initiation factor 2B, subunit 2 beta	0.07776646731518053	0.5403137706168019	FALSE	FALSE	FALSE
Xelaev18027277m.g	0	1	0	7	0	2.007386706589376	0	1.8261233709258722	0.5	3.5	1.419436752693078	Xelaev18027277m.g	NA	Xenbase_9.1	mdn1.L	NA	NA	NA	NA	NA	0.07788586192288072	0.5403137706168019	FALSE	FALSE	FALSE
ENOG411CRYY	14	17	15	33	0.13674558715122562	1.8670749143715328	0.06941929834638096	0.7436612107338995	15.5	24	1.4169150649073712	ENOG411CRYY	147906262, 45126627, 48734622, Xelaev18015219m.g	GenBank, Xenbase_9.1	kpna6.S	importin alpha 5.2 protein [Xenopus laevis], importin alpha 5.1 protein [Xenopus laevis], Unknown (protein for MGC:78911) [Xenopus laevis], NA	O60684, O15131	KPNA6, KPNA5	IPOA7, NA	Importin subunit alpha	0.07825388071158393	0.5403137706168019	FALSE	FALSE	FALSE
ENOG411CSB2	0	2	1	5	0.9954389325039961	0.9960992101179701	0.9763098939548995	0.8261233709258723	1	3	1.4082301256396537	ENOG411CSB2	Xelaev18005064m.g	Xenbase_9.1	htt.L	NA	P42858	HTT	HD IT15	huntingtin	0.07953146923310207	0.5403137706168019	FALSE	FALSE	FALSE
ENOG411CSPX	0	2	1	5	0.9954389325039961	0.9960992101179701	0.9763098939548995	0.8261233709258723	1	3	1.4082301256396537	ENOG411CSPX	148231575, Xelaev18007003m.g	GenBank, Xenbase_9.1	sptlc1.L	serine palmitoyltransferase, long chain base subunit 1 [Xenopus laevis], NA	O15269	SPTLC1	LCB1	serine palmitoyltransferase, long chain base subunit 1	0.07953146923310207	0.5403137706168019	FALSE	FALSE	FALSE
ENOG411CT0X	0	0	4	0	1.9909858702087517	0	2.298237988842262	0	0	2	1.4078396100712076	ENOG411CT0X	148222228, Xelaev18009133m.g, Xelaev18005377m.g	GenBank, Xenbase_9.1	trappc11.S, trappc11.L	uncharacterized protein LOC495307 [Xenopus laevis], NA	Q7Z392	TRAPPC11	C4orf41	trafficking protein particle complex 11	0.07958928423063769	0.5403137706168019	FALSE	FALSE	FALSE
ENOG411CZ9P	2	4	4	9	0.797715257795012	1.1932226486344832	0.7132754881211057	0.8261233709258724	3	6.5	1.407805694557644	ENOG411CZ9P	148229076, Xelaev18013200m.g	GenBank, Xenbase_9.1	dis3.L	DIS3 mitotic control homolog [Xenopus laevis], NA	Q9Y2L1	DIS3	KIAA1008 RRP44	DIS3 mitotic control homolog (S. cerevisiae)	0.0795943068505558	0.5403137706168019	FALSE	FALSE	FALSE
ENOG411CVR3	24	49	25	78	0.07874389418557408	1.905816980523357	0.03289342232126696	0.48604792932825075	36.5	51.5	1.4032964521841913	ENOG411CVR3	125858001, 147900724, 49118234, 67677951, Xelaev18034294m.g, Xelaev18036674m.g	GenBank, Xenbase_9.1	eif3a.L, eif3a.S	LOC443632 protein [Xenopus laevis], nucleolin [Xenopus laevis], NA	Q14152	EIF3A	EIF3S10 KIAA0139	Component of the eukaryotic translation initiation factor 3 (eIF-3) complex, which is required for several steps in the initiation of protein synthesis. The eIF-3 complex associates with the 40S ribosome and facilitates the recruitment of eIF-1, eIF-1A, eIF-2 GTP methionyl-tRNAi and eIF-5 to form the 43S preinitiation complex (43S PIC). The eIF-3 complex stimulates mRNA recruitment to the 43S PIC…	0.08026422786304573	0.5403137706168019	FALSE	FALSE	FALSE
ENOG411CSSA	1	2	3	5	0.9862276347740007	0.9960992101179701	0.9763098939548995	0.8261233709258723	1.5	4	1.4017167545512457	ENOG411CSSA	161611661	GenBank	NA	Echdc3 protein [Xenopus laevis]	Q96DC8	ECHDC3	NA	Enoyl CoA hydratase domain containing 3	0.0804999227029952	0.5403137706168019	FALSE	FALSE	FALSE
ENOG411CY17	5	9	9	15	1.0396521818794529	0.9376563618315544	0.7132754881211057	0.50419527603851	7	12	1.39816827975615	ENOG411CY17	148225138, Xelaev18028440m.g	GenBank, Xenbase_9.1	ppm1g.L	protein phosphatase, Mg2+/Mn2+ dependent, 1G [Xenopus laevis], NA	O15355	PPM1G	PPM1C	protein phosphatase, Mg2 Mn2 dependent, 1G	0.08103126986658034	0.5403137706168019	FALSE	FALSE	FALSE
ENOG411DG3I	0	0	1	1	0.9954389325039961	0.9688280389827452	0.9763098939548995	0.8261233709258723	0	1	1.3889464955990374	ENOG411DG3I	147906268, Xelaev18043091m.g, Xelaev18045866m.g	GenBank, Xenbase_9.1	cnp-like.L, cnp-like.S	2',3'-cyclic nucleotide 3' phosphodiesterase [Xenopus laevis], NA	NA	NA	NA	2',3'-cyclic nucleotide 3' phosphodiesterase	0.0824245102380072	0.5403137706168019	FALSE	FALSE	FALSE
ENOG411CYVT	0	0	1	1	0.9954389325039961	0.9688280389827452	0.9763098939548995	0.8261233709258723	0	1	1.3889464955990374	ENOG411CYVT	Xelaev18036360m.g	Xenbase_9.1	usp48.L	NA	Q86UV5	USP48	USP31	ubiquitin specific peptidase 48	0.0824245102380072	0.5403137706168019	FALSE	FALSE	FALSE
ENOG411CS1M	0	0	1	1	0.9954389325039961	0.9688280389827452	0.9763098939548995	0.8261233709258723	0	1	1.3889464955990374	ENOG411CS1M	148921627, Xelaev18023677m.g, Xelaev18025679m.g	GenBank, Xenbase_9.1	sgsm3.L, sgsm3.S	LOC100101321 protein [Xenopus laevis], NA	Q96HU1	SGSM3	MAP RABGAPLP RUTBC3	Small G protein signaling modulator 3	0.0824245102380072	0.5403137706168019	FALSE	FALSE	FALSE
ENOG411CPZH	0	0	1	1	0.9954389325039961	0.9688280389827452	0.9763098939548995	0.8261233709258723	0	1	1.3889464955990374	ENOG411CPZH	148224862, Xelaev18006124m.g, Xelaev18009677m.g	GenBank, Xenbase_9.1	kcmf1.L, kcmf1.S	E3 ubiquitin-protein ligase KCMF1 [Xenopus laevis], NA	Q9P0J7	KCMF1	FIGC ZZZ1	potassium channel modulatory factor 1	0.0824245102380072	0.5403137706168019	FALSE	FALSE	FALSE
ENOG411CPDZ	0	0	1	1	0.9954389325039961	0.9688280389827452	0.9763098939548995	0.8261233709258723	0	1	1.3889464955990374	ENOG411CPDZ	54648209, Xelaev18000028m.g, Xelaev18000478m.g, Xelaev18021007m.g, Xelaev18017725m.g, Xelaev18041732m.g, Xelaev18002890m.g	GenBank, Xenbase_9.1	Xelaev18000028m.g, Xelaev18000478m.g, abcd2.S, abcd2.L, Xelaev18041732m.g, Xelaev18002890m.g	LOC495468 protein [Xenopus laevis], NA	Q9UBJ2, P33897	ABCD2, ABCD1	ALD1 ALDL1 ALDR ALDRP, ALD	ATP-binding cassette, sub-family D (ALD), member	0.0824245102380072	0.5403137706168019	FALSE	FALSE	FALSE
ENOG411CYMN	0	0	1	1	0.9954389325039961	0.9688280389827452	0.9763098939548995	0.8261233709258723	0	1	1.3889464955990374	ENOG411CYMN	124481820, Xelaev18023349m.g	GenBank, Xenbase_9.1	znf326.L	LOC100037139 protein [Xenopus laevis], NA	Q5BKZ1	ZNF326	ZIRD	Zinc finger protein 326	0.0824245102380072	0.5403137706168019	FALSE	FALSE	FALSE
ENOG411CS53	0	0	1	1	0.9954389325039961	0.9688280389827452	0.9763098939548995	0.8261233709258723	0	1	1.3889464955990374	ENOG411CS53	147905270, 148228440, Xelaev18025066m.g, Xelaev18022913m.g, Xelaev18018953m.g, Xelaev18008545m.g, Xelaev18011172m.g	GenBank, Xenbase_9.1	dnajb4.S, dnajb4.L, dnajb1.L, dnajb5-like.L, dnajb5-like.S	DnaJ (Hsp40) homolog, subfamily B, member 4 [Xenopus laevis], DnaJ (Hsp40) homolog, subfamily B, member 5 [Xenopus laevis], NA	O75953, Q9UDY4, P25685	DNAJB5, DNAJB4, DNAJB1	HSC40, DNAJW HLJ1, DNAJ1 HDJ1 HSPF1	DnaJ (Hsp40) homolog, subfamily B, member	0.0824245102380072	0.5403137706168019	FALSE	FALSE	FALSE
ENOG411CR65	0	0	1	1	0.9954389325039961	0.9688280389827452	0.9763098939548995	0.8261233709258723	0	1	1.3889464955990374	ENOG411CR65	148228474, 148233842, Xelaev18037567m.g	GenBank, Xenbase_9.1	Xelaev18037567m.g	uncharacterized protein LOC432173 precursor [Xenopus laevis], reticulocalbin 2 precursor [Xenopus laevis], NA	Q14257	RCN2	ERC55	Reticulocalbin 2, EF-hand calcium binding domain	0.0824245102380072	0.5403137706168019	FALSE	FALSE	FALSE
ENOG411CTSP	0	0	1	1	0.9954389325039961	0.9688280389827452	0.9763098939548995	0.8261233709258723	0	1	1.3889464955990374	ENOG411CTSP	148226384, 166201906, Xelaev18018445m.g	GenBank, Xenbase_9.1	dis3l.L	DIS3-like exonuclease 1 [Xenopus laevis], RecName: Full=DIS3-like exonuclease 1, NA	Q8TF46	DIS3L	DIS3L1 KIAA1955	DIS3 mitotic control homolog (S. cerevisiae)-like	0.0824245102380072	0.5403137706168019	FALSE	FALSE	FALSE
ENOG411CVJ6	0	0	1	1	0.9954389325039961	0.9688280389827452	0.9763098939548995	0.8261233709258723	0	1	1.3889464955990374	ENOG411CVJ6	Xelaev18039349m.g, Xelaev18042548m.g	Xenbase_9.1	bckdha.L, bckdha.S	NA	P12694	BCKDHA	NA	Branched chain keto acid dehydrogenase E1 alpha polypeptide	0.0824245102380072	0.5403137706168019	FALSE	FALSE	FALSE
ENOG411CY2J	0	0	1	1	0.9954389325039961	0.9688280389827452	0.9763098939548995	0.8261233709258723	0	1	1.3889464955990374	ENOG411CY2J	12082247, 148229513, 16209558, 28804566, 313661062, Xelaev18012056m.g, Xelaev18030116m.g, Xelaev18028098m.g	GenBank, Xenbase_9.1	pum1.L, pum2.S, pum2.L	pumilio [Xenopus laevis], pumilio homolog 1 [Xenopus laevis], pumilio-like protein 1 [Xenopus laevis], Pumilio [Xenopus laevis], Pumilio2 [Xenopus laevis], NA	Q14671, Q8TB72	PUM1, PUM2	KIAA0099 PUMH1, KIAA0235 PUMH2	pumilio homolog	0.0824245102380072	0.5403137706168019	FALSE	FALSE	FALSE
ENOG411CXAG	0	0	1	1	0.9954389325039961	0.9688280389827452	0.9763098939548995	0.8261233709258723	0	1	1.3889464955990374	ENOG411CXAG	148222561, 148232573, 27696700, 495672, 80477550, Xelaev18018052m.g	GenBank, Xenbase_9.1	loc100158581.L	protein tyrosine phosphatase, non-receptor type 9 [Xenopus laevis], tyrosine phosphatase [Xenopus laevis], MGC52584 protein [Xenopus laevis], NA	P43378	PTPN9	NA	protein tyrosine phosphatase, non-receptor type 9	0.0824245102380072	0.5403137706168019	FALSE	FALSE	FALSE
ENOG411CT44	0	0	1	1	0.9954389325039961	0.9688280389827452	0.9763098939548995	0.8261233709258723	0	1	1.3889464955990374	ENOG411CT44	54038138, Xelaev18034940m.g, Xelaev18000673m.g	GenBank, Xenbase_9.1	wapl.L, wapl.S	LOC495199 protein [Xenopus laevis], NA	Q7Z5K2	WAPL	FOE KIAA0261 WAPAL	wings apart-like homolog (Drosophila)	0.0824245102380072	0.5403137706168019	FALSE	FALSE	FALSE
ENOG411CY0K	0	0	1	1	0.9954389325039961	0.9688280389827452	0.9763098939548995	0.8261233709258723	0	1	1.3889464955990374	ENOG411CY0K	Xelaev18014499m.g, Xelaev18011189m.g	Xenbase_9.1	loc100497622-like.S, loc100497622-like.L	NA	P56181	NDUFV3	NA	NADH dehydrogenase (Ubiquinone) flavoprotein 3, 10kDa	0.0824245102380072	0.5403137706168019	FALSE	FALSE	FALSE
ENOG411CV1E	0	0	1	1	0.9954389325039961	0.9688280389827452	0.9763098939548995	0.8261233709258723	0	1	1.3889464955990374	ENOG411CV1E	189442677, 50415052, Xelaev18013967m.g, Xelaev18002023m.g, Xelaev18016499m.g, Xelaev18000698m.g	GenBank, Xenbase_9.1	Xelaev18013967m.g, Xelaev18002023m.g, Xelaev18016499m.g, Xelaev18000698m.g	LOC100174804 protein [Xenopus laevis], Nup98 protein [Xenopus laevis], NA	P52948	NUP98	ADAR2	nucleoporin 98kDa	0.0824245102380072	0.5403137706168019	FALSE	FALSE	FALSE
ENOG411CPRY	0	0	1	1	0.9954389325039961	0.9688280389827452	0.9763098939548995	0.8261233709258723	0	1	1.3889464955990374	ENOG411CPRY	147900331, 148234875, 54647654, Xelaev18027209m.g	GenBank, Xenbase_9.1	sec63.L	SEC63 homolog [Xenopus laevis], MGC80164 protein [Xenopus laevis], LOC495416 protein [Xenopus laevis], NA	Q9UGP8	SEC63	SEC63L	SEC63 homolog (S. cerevisiae)	0.0824245102380072	0.5403137706168019	FALSE	FALSE	FALSE
ENOG411CTXZ	0	0	1	1	0.9954389325039961	0.9688280389827452	0.9763098939548995	0.8261233709258723	0	1	1.3889464955990374	ENOG411CTXZ	Xelaev18029900m.g, Xelaev18027855m.g	Xenbase_9.1	kcnj13.S, kcnj13.L	NA	O60928	KCNJ13	NA	potassium inwardly-rectifying channel, subfamily J, member 13	0.0824245102380072	0.5403137706168019	FALSE	FALSE	FALSE
ENOG411CR35	0	0	1	1	0.9954389325039961	0.9688280389827452	0.9763098939548995	0.8261233709258723	0	1	1.3889464955990374	ENOG411CR35	148229126, Xelaev18013324m.g	GenBank, Xenbase_9.1	rhebl1.L	Ras homolog enriched in brain like 1 [Xenopus laevis], NA	Q8TAI7	RHEBL1	NA	Ras homolog enriched in brain like 1	0.0824245102380072	0.5403137706168019	FALSE	FALSE	FALSE
ENOG411CS6N	0	0	1	1	0.9954389325039961	0.9688280389827452	0.9763098939548995	0.8261233709258723	0	1	1.3889464955990374	ENOG411CS6N	281494441, Xelaev18018353m.g	GenBank, Xenbase_9.1	fanci.L	Fanconi anemia complementation group I transcript variant 1 [Xenopus laevis], NA	Q9NVI1	FANCI	KIAA1794	Fanconi anemia, complementation group I	0.0824245102380072	0.5403137706168019	FALSE	FALSE	FALSE
ENOG411CWVU	0	0	1	1	0.9954389325039961	0.9688280389827452	0.9763098939548995	0.8261233709258723	0	1	1.3889464955990374	ENOG411CWVU	49119594, Xelaev18005767m.g, Xelaev18009456m.g	GenBank, Xenbase_9.1	smarcad1.L, smarcad1.S	LOC443627 protein [Xenopus laevis], NA	Q9H4L7	SMARCAD1	KIAA1122	SWI SNF-related matrix-associated actin-dependent regulator of chromatin subfamily A containing DEAD H box 1	0.0824245102380072	0.5403137706168019	FALSE	FALSE	FALSE
ENOG411CSYV	0	0	1	1	0.9954389325039961	0.9688280389827452	0.9763098939548995	0.8261233709258723	0	1	1.3889464955990374	ENOG411CSYV	147898975, 148222347, 49118667, Xelaev18029701m.g, Xelaev18027573m.g	GenBank, Xenbase_9.1	ect2.S, ect2.L	epithelial cell transforming 2 [Xenopus laevis], epithelial cell transforming sequence 2 oncogene [Xenopus laevis], ECT2 protein [Xenopus laevis], NA	Q9H8V3	ECT2	NA	Epithelial cell transforming sequence 2 oncogene	0.0824245102380072	0.5403137706168019	FALSE	FALSE	FALSE
ENOG411CUF0	0	0	1	1	0.9954389325039961	0.9688280389827452	0.9763098939548995	0.8261233709258723	0	1	1.3889464955990374	ENOG411CUF0	118763692, 157073885, 49115339, 49118262, Xelaev18028173m.g	GenBank, Xenbase_9.1	cdc5l.L	LOC443636 protein [Xenopus laevis], cell division cycle 5-like [Xenopus laevis], Cdc5l protein [Xenopus laevis], NA	Q99459	CDC5L	KIAA0432 PCDC5RP	CDC5 cell division cycle 5-like (S. pombe)	0.0824245102380072	0.5403137706168019	FALSE	FALSE	FALSE
ENOG411CU2Z	0	0	1	1	0.9954389325039961	0.9688280389827452	0.9763098939548995	0.8261233709258723	0	1	1.3889464955990374	ENOG411CU2Z	148224594	GenBank	NA	cysteine and histidine-rich domain-containing protein 1 [Xenopus laevis]	Q9UHD1	CHORDC1	CHP1	cysteine and histidine-rich domain (CHORD) containing 1	0.0824245102380072	0.5403137706168019	FALSE	FALSE	FALSE
ENOG411CYZW	2	1	3	5	0.42863145307757394	1.5268033056798456	0.3913473932337433	1.4110858716470287	1.5	4	1.3827011780852518	ENOG411CYZW	Xelaev18005032m.g, Xelaev18008868m.g	Xenbase_9.1	letm1.L, letm1.S	NA	O95202	LETM1	NA	leucine zipper-EF-hand containing transmembrane protein 1	0.08337825526987638	0.5450965505815575	FALSE	FALSE	FALSE
ENOG411CXG1	0	3	2	5	1.407788694550312	0.54127304156250855	1.561272394676056	0.41108587164702864	1.5	3.5	1.3781947705566004	ENOG411CXG1	126631410, 147899686	GenBank	NA	LOC100049109 protein [Xenopus laevis], Rae1/Gle2 protein [Xenopus laevis]	P78406	RAE1	MRNP41	RAE1 RNA export 1 homolog (S. pombe)	0.0840715807009247	0.5470862308982534	FALSE	FALSE	FALSE
ENOG411CY4Q	7	15	9	27	0.46541892607500884	1.4806446015054378	0.298237988842262	0.6334782929834764	11	18	1.3760747169719476	ENOG411CY4Q	Xelaev18044172m.g, Xelaev18046790m.g	Xenbase_9.1	tbcd.L, tbcd.S	NA	Q9BTW9	TBCD	KIAA0988 SSD1 TFCD	tubulin folding cofactor D	0.08439925110140517	0.5470862308982534	FALSE	FALSE	FALSE
ENOG411CSAZ	9	9	14	15	1.0034428893567378	0.9376563618315544	0.5612723946760556	0.50419527603851	9	14.5	1.3725644434713709	ENOG411CSAZ	1143703, 148230509, Xelaev18019995m.g, Xelaev18019773m.g	GenBank, Xenbase_9.1	Xelaev18019995m.g, Xelaev18019773m.g	protein phosphatase 2A, catalytic subunit, beta isoform [Xenopus laevis], protein phosphatase 2, catalytic subunit, alpha isozyme [Xenopus laevis], NA	P67775, P62714	PPP2CA, PPP2CB	NA	serine threonine-protein phosphatase	0.08494389599048509	0.5470862308982534	FALSE	FALSE	FALSE
ENOG411CUN2	0	0	0	4	0	1.937711845609288	0	2.148051465813235	0	2	1.370169186015828	ENOG411CUN2	Xelaev18024996m.g, Xelaev18022833m.g	Xenbase_9.1	cnot1.S, cnot1.L	NA	A5YKK6	CNOT1	CDC39 KIAA1007 NOT1	CCR4-NOT transcription complex subunit 1	0.08531704738032639	0.5470862308982534	FALSE	FALSE	FALSE
ENOG411CUD5	0	0	0	4	0	1.937711845609288	0	2.148051465813235	0	2	1.370169186015828	ENOG411CUD5	148225300, Xelaev18037778m.g	GenBank, Xenbase_9.1	nosip.S	nitric oxide synthase-interacting protein [Xenopus laevis], NA	NA	NA	NA	Nitric oxide synthase interacting protein	0.08531704738032639	0.5470862308982534	FALSE	FALSE	FALSE
ENOG411CS6Z	0	0	0	4	0	1.937711845609288	0	2.148051465813235	0	2	1.370169186015828	ENOG411CS6Z	147904934, Xelaev18025436m.g, Xelaev18023389m.g	GenBank, Xenbase_9.1	mettl13.S, mettl13.L	methyltransferase-like protein 13 [Xenopus laevis], NA	Q8N6R0	EEF1AKNMT	KIAA0859 METTL13	methyltransferase like 13	0.08531704738032639	0.5470862308982534	FALSE	FALSE	FALSE
ENOG411DE1Y	0	0	0	4	0	1.937711845609288	0	2.148051465813235	0	2	1.370169186015828	ENOG411DE1Y	148231738, 148236691, Xelaev18044878m.g, Xelaev18047317m.g	GenBank, Xenbase_9.1	adprh.L, adprh.S	ADP-ribosylarginine hydrolase [Xenopus laevis], uncharacterized protein LOC432184 [Xenopus laevis], NA	P54922	ADPRH	ARH1	ADP-ribosylarginine hydrolase	0.08531704738032639	0.5470862308982534	FALSE	FALSE	FALSE
ENOG411CTU7	2	3	6	5	1.394837396380582	0.54127304156250855	1.1987023152913476	0.41108587164702864	2.5	5.5	1.3690368197956155	ENOG411CTU7	46249886, Xelaev18017776m.g, Xelaev18020970m.g	GenBank, Xenbase_9.1	dnajc2.L, dnajc2.S	LOC414559 protein [Xenopus laevis], NA	Q99543	DNAJC2	MPHOSPH11 MPP11 ZRF1	DnaJ (Hsp40) homolog, subfamily C, member 2	0.08549388290179995	0.5470862308982534	FALSE	FALSE	FALSE
ENOG411CU6Z	1	0	2	2	0.5640392668774026	1.3701428965181228	0.5612723946760559	1.4110858716470287	0.5	2	1.3676733237870429	ENOG411CU6Z	Xelaev18013989m.g, Xelaev18016569m.g	Xenbase_9.1	vps16.L, vps16.S	NA	Q9H269	VPS16	NA	vacuolar protein sorting 16 homolog (S. cerevisiae)	0.0857071767977938	0.5470862308982534	FALSE	FALSE	FALSE
ENOG411CX0J	2	0	2	4	-0.018530600660750022	1.937711845609288	-0.023690106045100492	2.148051465813235	1	3	1.3570660726291517	ENOG411CX0J	148224070, 148230326, Xelaev18019754m.g	GenBank, Xenbase_9.1	samm50.S	sorting and assembly machinery component 50 homolog B [Xenopus laevis], sorting and assembly machinery component 50 homolog A [Xenopus laevis], NA	Q9Y512	SAMM50	SAM50	sorting and assembly machinery component 50 homolog (S. cerevisiae)	0.08738010870712948	0.5563047758527195	FALSE	FALSE	FALSE
ENOG411CTX0	0	1	1	3	0.9954389325039961	0.9010527153641567	0.9763098939548995	0.8261233709258723	0.5	2	1.3410221046712207	ENOG411CTX0	147901488, 159155365, 163915837, 213626157, 47938645, 67678434, Xelaev18020163m.g, Xelaev18047985m.g, Xelaev18018794m.g, Xelaev18001582m.g, Xelaev18001591m.g, Xelaev18001599m.g, Xelaev18047982m.g, Xelaev18001590m.g, Xelaev18047983m.g, Xelaev18001596m.g, Xelaev18001583m.g, Xelaev18001597m.g, Xelaev18001589m.g, Xelaev18001587m.g, Xelaev18047986m.g, Xelaev18001592m.g	GenBank, Xenbase_9.1	loc100496673.S, loc100492292.S, loc100496673.L, rnf112.L, rnf112.1.L, Xelaev18001599m.g, Xelaev18047982m.g, Xetrov90022671m.L, Xelaev18047983m.g, Xelaev18001596m.g, loc100492292.1.L, Xelaev18001597m.g, Xetrov90022668m.L, Xelaev18001587m.g, rnf112.S, Xelaev18001592m.g	ring finger protein 112 [Xenopus laevis], LOC100127269 protein [Xenopus laevis], LOC100137704 protein [Xenopus laevis], Hypothetical protein LOC100127269 [Xenopus laevis], LOC432253 protein [Xenopus laevis], NA	Q9ULX5	RNF112	BFP ZNF179	ring finger protein 112	0.08995663794017403	0.5666403733898516	FALSE	FALSE	FALSE
ENOG411CZWD	0	1	1	3	0.9954389325039961	0.9010527153641567	0.9763098939548995	0.8261233709258723	0.5	2	1.3410221046712207	ENOG411CZWD	Xelaev18033098m.g, Xelaev18031023m.g	Xenbase_9.1	ankrd28.S, ankrd28.L	NA	O15084	ANKRD28	KIAA0379	ankyrin repeat domain 28	0.08995663794017403	0.5666403733898516	FALSE	FALSE	FALSE
ENOG411CTTR	0	1	1	3	0.9954389325039961	0.9010527153641567	0.9763098939548995	0.8261233709258723	0.5	2	1.3410221046712207	ENOG411CTTR	116487686, 168693453	GenBank	NA	LOC100049719 protein [Xenopus laevis], glutamate-cysteine ligase, catalytic subunit [Xenopus laevis]	P48506	GCLC	GLCL GLCLC	glutamate--cysteine ligase catalytic subunit	0.08995663794017403	0.5666403733898516	FALSE	FALSE	FALSE
ENOG411CQNM	0	1	1	3	0.9954389325039961	0.9010527153641567	0.9763098939548995	0.8261233709258723	0.5	2	1.3410221046712207	ENOG411CQNM	148224776, Xelaev18026677m.g	GenBank, Xenbase_9.1	rdh13.L	retinol dehydrogenase 13 (all-trans/9-cis) [Xenopus laevis], NA	H0YJ10, Q8TC12, Q96NR8, Q8NBN7, H0YIZ8	NA, RDH11, RDH12, RDH13	NA, ARSDR1 PSDR1 SDR7C1, SDR7C2, SDR7C3	retinol dehydrogenase	0.08995663794017403	0.5666403733898516	FALSE	FALSE	FALSE
ENOG411CX0G	2	3	4	7	0.797715257795012	1.0969321796323708	0.7132754881211057	0.8261233709258723	2.5	5.5	1.3397180509626172	ENOG411CX0G	161612009, Xelaev18008139m.g	GenBank, Xenbase_9.1	mrps27.L	LOC100127333 protein [Xenopus laevis], NA	Q92552	MRPS27	KIAA0264	Mitochondrial ribosomal protein S27	0.09016851336425681	0.5666403733898516	FALSE	FALSE	FALSE
ENOG411CPYI	2	5	4	10	0.797715257795012	1.075834029817418	0.7132754881211057	0.7005924888420134	3.5	7	1.3247994061579744	ENOG411CPYI	148225959, 148232696	GenBank	NA	uncharacterized protein LOC432221 [Xenopus laevis], Vps20-associated 1 homolog [Xenopus laevis]	Q9NP79	VTA1	C6orf55	Vps20-associated 1 homolog (S. cerevisiae)	0.09261884592108285	0.5805387455671998	FALSE	FALSE	FALSE
ENOG411CWFB	2	7	6	10	1.394837396380582	0.47477974220686486	1.1987023152913476	0.28555498956316955	4.5	8	1.322018956917773	ENOG411CWFB	148238289, 50415212, 62740173, Xelaev18014108m.g	GenBank, Xenbase_9.1	pold3.L	DNA-directed DNA polymerase delta 3 [Xenopus laevis], POLD3 protein [Xenopus laevis], NA	Q15054	POLD3	KIAA0039	polymerase (DNA-directed), delta 3, accessory subunit	0.09308091923599379	0.5811873253775356	FALSE	FALSE	FALSE
ENOG411CSG5	1	3	4	5	1.3273307913105068	0.54127304156250855	1.298237988842262	0.41108587164702864	2	4.5	1.321302441575683	ENOG411CSG5	148226877, 148231597, 148235108, Xelaev18046175m.g, Xelaev18031819m.g	GenBank, Xenbase_9.1	ptpn1.S, ptpn2.L	protein tyrosine phosphatase, non-receptor type 1 [Xenopus laevis], protein tyrosine phosphatase, non-receptor type 2 [Xenopus laevis], NA	P17706, P18031	PTPN2, PTPN1	PTPT, PTP1B	Protein tyrosine phosphatase, non-receptor type	0.09320027010577256	0.5811873253775356	FALSE	FALSE	FALSE
ENOG411D3ND	0	4	3	5	1.7242131620693701	0.14215024006098273	1.9763098939548995	0.08915777675966605	2	4	1.3197182178047677	ENOG411D3ND	284521647	GenBank	NA	dynein, light chain, Tctex-type 1 [Xenopus laevis]	P63172	DYNLT1	TCTEL1 TCTEX-1 TCTEX1	Dynein light chain Tctex-type	0.09346455762832302	0.5813447676523825	FALSE	FALSE	FALSE
ENOG411CUAI	7	6	7	16	-0.03467385035135413	1.8924662942534223	-0.023690106045100492	1.1062312901186073	6.5	11.5	1.3136576351202809	ENOG411CUAI	13540314, 148223119, 148227542, 148227710, Xelaev18043239m.g, Xelaev18046000m.g	GenBank, Xenbase_9.1	pabpc1l.L, pabpc1l.S	embryonic poly(A) binding protein [Xenopus laevis], uncharacterized protein LOC495336 [Xenopus laevis], embryonic polyadenylate-binding protein A [Xenopus laevis], embryonic polyadenylate-binding protein B [Xenopus laevis], NA	Q4VXU2	PABPC1L	C20orf119	poly(A) binding protein, cytoplasmic 1-like	0.0944807218684871	0.5861661111840832	FALSE	FALSE	FALSE
ENOG411CUJC	0	2	4	2	1.9909858702087517	-0.13560641488097533	2.298237988842262	-0.17387662907412774	1	3	1.3119513945364736	ENOG411CUJC	147899159, 148234176, 27924223, Xelaev18028865m.g, Xelaev18026608m.g	GenBank, Xenbase_9.1	rrbp1.S, rrbp1.L	MGC82852 protein [Xenopus laevis], ribosome-binding protein 1 [Xenopus laevis], MGC68897 protein [Xenopus laevis], NA	Q9P2E9	RRBP1	KIAA1398	ribosome binding protein 1 homolog 180kDa (dog)	0.09476826746601122	0.5864540113927208	FALSE	FALSE	FALSE
ENOG411CWDC	21	25	27	37	0.8065963280846614	1.0465696207390245	0.3242331973752063	0.37361116622836604	23	32	1.3103862090772307	ENOG411CWDC	148228072, 148230444, Xelaev18034350m.g	GenBank, Xenbase_9.1	phb2.L	MGC84728 protein [Xenopus laevis], prohibitin 2 [Xenopus laevis], NA	Q99623	PHB2	BAP REA	prohibitin 2	0.09503260830495383	0.5865972167452987	FALSE	FALSE	FALSE
ENOG411DGE5	7	9	11	15	0.9082157742862715	0.9376563618315544	0.5612723946760559	0.50419527603851	8	13	1.3052287046522124	ENOG411DGE5	148233326, Xelaev18017497m.g	GenBank, Xenbase_9.1	amdhd1.L	probable imidazolonepropionase [Xenopus laevis], NA	Q96NU7	AMDHD1	NA	amidohydrolase domain containing 1	0.09590749132400933	0.5904987820252929	FALSE	FALSE	FALSE
ENOG411CU81	20	22	25	34	0.6872587960346945	1.1555367107627081	0.2844321893172313	0.43184443181382587	21	29.5	1.303053199196544	ENOG411CU81	147905905, 148226444, Xelaev18023999m.g	GenBank, Xenbase_9.1	rpn1.L	dolichyl-diphosphooligosaccharide--protein glycosyltransferase subunit 1 precursor [Xenopus laevis], similar to ribophorin I precursor [Xenopus laevis], NA	P04843	RPN1	NA	ribophorin I	0.09627829995262203	0.5912849128403453	FALSE	FALSE	FALSE
ENOG411CYZK	1	7	2	14	0.5640392668774026	1.2730172867629634	0.5612723946760559	0.7330139665343909	4	8	1.2989951465022913	ENOG411CYZK	Xelaev18027532m.g, Xelaev18029670m.g	Xenbase_9.1	opa1.L, opa1.S	NA	O60313	OPA1	KIAA0567	Optic atrophy 1 (Autosomal dominant)	0.09697279740817727	0.5934296011724608	FALSE	FALSE	FALSE
ENOG411CQ5G	3	5	4	12	0.35526851083729444	1.4806122772567178	0.298237988842262	0.9416005883458082	4	8	1.2981637547113791	ENOG411CQ5G	Xelaev18026624m.g, Xelaev18028852m.g	Xenbase_9.1	crnkl1.L, crnkl1.S	NA	Q9BZJ0	CRNKL1	CRN	crooked neck pre-mRNA splicing factor-like 1 (Drosophila)	0.0971155350602958	0.5934296011724608	FALSE	FALSE	FALSE
ENOG411CT0N	6	7	9	13	0.7425457522148697	1.0877659947181482	0.49088306678465793	0.6334782929834764	6.5	11	1.294225847941733	ENOG411CT0N	148223631, 148226234, Xelaev18022223m.g	GenBank, Xenbase_9.1	otub1.L	uncharacterized protein LOC734802 [Xenopus laevis], OTU domain, ubiquitin aldehyde binding 1 [Xenopus laevis], NA	Q96FW1	OTUB1	OTB1 OTU1	OTU domain, ubiquitin aldehyde binding 1	0.09779371049595104	0.5960759496896063	FALSE	FALSE	FALSE
ENOG411CSG3	16	23	23	32	1.0690456367091243	0.7555755343177682	0.4738095534257164	0.28555498956316955	19.5	27.5	1.290202003129655	ENOG411CSG3	147906027, Xelaev18004807m.g, Xelaev18008826m.g	GenBank, Xenbase_9.1	suclg1.L, suclg1.S	succinate-CoA ligase, alpha subunit [Xenopus laevis], NA	P53597	SUCLG1	NA	succinate-CoA ligase, alpha subunit	0.09849026542148345	0.5988208137626194	FALSE	FALSE	FALSE
ENOG411CR6T	4	5	4	14	-0.02620812261555809	1.8451514562478053	-0.023690106045100332	1.1480514658132346	4.5	9	1.2861871658054267	ENOG411CR6T	148225687	GenBank	NA	glutaryl-CoA dehydrogenase [Xenopus laevis]	Q92947	GCDH	NA	Glutaryl-CoA dehydrogenase	0.09918887453278867	0.6015644460442445	FALSE	FALSE	FALSE
ENOG411CR9I	57	89	68	115	0.886904991860659	0.9204413713341107	0.2268533556054966	0.1922512697237698	73	91.5	1.2779868693678664	ENOG411CR9I	148234611, Xelaev18002590m.g, Xelaev18019539m.g	GenBank, Xenbase_9.1	acad9.S, acadvl.L	acyl-CoA dehydrogenase family, member 9 [Xenopus laevis], NA	P49748, Q9H845	ACADVL, ACAD9	VLCAD, NA	acyl-CoA dehydrogenase	0.10062702805522968	0.6087684881351209	FALSE	FALSE	FALSE
ENOG411CU5H	36	68	50	82	1.4330458817162917	0.3550814933804937	0.4392818702974455	0.09263834549462796	52	66	1.2643969925562382	ENOG411CU5H	148222152, 84570116, Xelaev18025932m.g, Xelaev18024035m.g	GenBank, Xenbase_9.1	qars.S, qars.L	glutaminyl-tRNA synthetase [Xenopus laevis], LOC734179 protein [Xenopus laevis], NA	P47897	QARS	NA	Glutaminyl-tRNA synthetase	0.10304378589725963	0.6218424002534377	FALSE	FALSE	FALSE
ENOG411CZJ5	0	1	0	6	0	1.7797624090697997	0	1.6334782929834764	0.5	3	1.2584820683541613	ENOG411CZJ5	162287121, Xelaev18004815m.g, Xelaev18008815m.g	GenBank, Xenbase_9.1	smox.L, smox.S	spermine oxidase [Xenopus laevis], NA	Q9NWM0	SMOX	C20orf16 SMO	Spermine oxidase	0.10410873410525649	0.6251665218369971	FALSE	FALSE	FALSE
ENOG411DFA4	0	1	0	6	0	1.7797624090697997	0	1.6334782929834764	0.5	3	1.2584820683541613	ENOG411DFA4	124481695, Xelaev18038454m.g, Xelaev18041797m.g	GenBank, Xenbase_9.1	gapvd1.L, gapvd1.S	Gapvd1 protein [Xenopus laevis], NA	Q14C86	GAPVD1	GAPEX5 KIAA1521 RAP6	GTPase activating protein and VPS9 domains 1	0.10410873410525649	0.6251665218369971	FALSE	FALSE	FALSE
ENOG411DGJD	9	6	11	13	0.40802393563146505	1.369431161573357	0.23934429978869357	0.8261233709258723	7.5	12	1.2568505524881235	ENOG411DGJD	148237426, Xelaev18031842m.g, Xelaev18043561m.g, Xelaev18033591m.g, Xelaev18046284m.g	GenBank, Xenbase_9.1	ppp4r1.L, ppp4r1l.L, ppp4r1.S, ppp4r1l.S	protein phosphatase 4, regulatory subunit 1 [Xenopus laevis], NA	NA	NA	NA	phosphatase 4, regulatory subunit	0.10440387831926519	0.6253946602769777	FALSE	FALSE	FALSE
ENOG411CY8Q	2	6	4	11	0.797715257795012	0.9776960097317916	0.7132754881211057	0.6037309495894243	4	7.5	1.2554053466632062	ENOG411CY8Q	Xelaev18021220m.g, Xelaev18017483m.g	Xenbase_9.1	ndufa12.S, ndufa12.L	NA	Q9UI09	NDUFA12	DAP13	NADH dehydrogenase ubiquinone 1 alpha subcomplex 12	0.10466582470128107	0.625423306323134	FALSE	FALSE	FALSE
ENOG411CRH4	2	1	2	6	-0.018530600660750022	1.7797624090697997	-0.023690106045100492	1.6334782929834764	1.5	4	1.2453789549674852	ENOG411CRH4	71679822, Xelaev18024803m.g	GenBank, Xenbase_9.1	dnaaf1.S	Chc1-b-prov protein [Xenopus laevis], NA	Q8NEP3	DNAAF1	LRRC50	dynein, axonemal, assembly factor 1	0.1064962426859211	0.6339869913967713	FALSE	FALSE	FALSE
ENOG411CVP3	1	4	5	5	1.6181265945922993	0.14215024006098273	1.561272394676056	0.08915777675966605	2.5	5	1.2447036865489267	ENOG411CVP3	147900927, Xelaev18011177m.g, Xelaev18008550m.g	GenBank, Xenbase_9.1	stoml2.S, stoml2.L	stomatin (EPB72)-like 2 [Xenopus laevis], NA	Q9UJZ1	STOML2	SLP2	stomatin (Epb7.2)-like 2	0.10662034518144714	0.6339869913967713	FALSE	FALSE	FALSE
ENOG411CRST	7	11	12	16	1.112452033853891	0.6453523300261261	0.6767496120959916	0.32862371145505537	9	14	1.2429553856988655	ENOG411CRST	147900404, 147906212, 148227816, Xelaev18022045m.g, Xelaev18037859m.g, Xelaev18024318m.g, Xelaev18036138m.g	GenBank, Xenbase_9.1	ppp6r3.L, ppp6r1.S, ppp6r3.S, ppp6r1.L	protein phosphatase 6, regulatory subunit 1 [Xenopus laevis], serine/threonine-protein phosphatase 6 regulatory subunit 3-A [Xenopus laevis], serine/threonine-protein phosphatase 6 regulatory subunit 3-B [Xenopus laevis], NA	Q5H9R7, Q9UPN7	PPP6R3, PPP6R1	C11orf23 KIAA1558 PP6R3 SAPL SAPS3, KIAA1115 PP6R1 SAPS1	Protein phosphatase 6, regulatory subunit	0.10694213713554153	0.6343494573503341	FALSE	FALSE	FALSE
ENOG411CZN5	4	2	4	8	-0.02620812261555809	1.7526107251628225	-0.023690106045100332	1.4110858716470283	3	6	1.2207509873192746	ENOG411CZN5	114108055	GenBank	NA	MGC154345 protein [Xenopus laevis]	NA	NA	NA	acyl coa dehydrogenase 6-like	0.11109015814145468	0.6518027814602939	FALSE	FALSE	FALSE
ENOG411DGJ7	0	0	3	0	1.7242131620693701	0	1.9763098939548995	0	0	1.5	1.2192028191103512	ENOG411DGJ7	147906584, 315192363, 315192365, 315192367, 315192369, 315192373, 315192375, 315192379, 315192381, 315192383, Xelaev18032894m.g, Xelaev18030757m.g	GenBank, Xenbase_9.1	mastl.S, mastl.L	serine/threonine-protein kinase greatwall [Xenopus laevis], Mastl [Xenopus laevis], NA	NA	NA	NA	microtubule associated serine threonine kinase-like	0.11138361111608831	0.6518027814602939	FALSE	FALSE	FALSE
ENOG411CPPT	0	2	2	3	1.407788694550312	0.31199846928016123	1.561272394676056	0.241160870204716	1	2.5	1.2160731657421076	ENOG411CPPT	120577559, Xelaev18037096m.g, Xelaev18034836m.g	GenBank, Xenbase_9.1	mcu.S, mcu.L	LOC100037005 protein [Xenopus laevis], NA	Q8NE86	MCU	C10orf42 CCDC109A	mitochondrial calcium uniporter	0.11197852582916205	0.6518027814602939	FALSE	FALSE	FALSE
ENOG411CUPB	0	2	2	3	1.407788694550312	0.31199846928016123	1.561272394676056	0.241160870204716	1	2.5	1.2160731657421076	ENOG411CUPB	148226727, Xelaev18034826m.g	GenBank, Xenbase_9.1	dnajc9.L	DnaJ (Hsp40) homolog, subfamily C, member 9 [Xenopus laevis], NA	Q8WXX5	DNAJC9	NA	DnaJ (Hsp40) homolog, subfamily C, member 9	0.11197852582916205	0.6518027814602939	FALSE	FALSE	FALSE
ENOG411CWTY	0	0	0	3	0	1.6780915843162603	0	1.8261233709258722	0	1.5	1.1865899387221046	ENOG411CWTY	Xelaev18043449m.g, Xelaev18046180m.g	Xenbase_9.1	adnp.L, adnp.S	NA	Q9H2P0	ADNP	ADNP1 KIAA0784	Activity-dependent neuroprotector homeobox	0.1176947032240081	0.6518027814602939	FALSE	FALSE	FALSE
ENOG411CUCI	0	0	0	3	0	1.6780915843162603	0	1.8261233709258722	0	1.5	1.1865899387221046	ENOG411CUCI	148232866, Xelaev18023609m.g	GenBank, Xenbase_9.1	hsd17b7.L	hydroxysteroid (17-beta) dehydrogenase 7 [Xenopus laevis], NA	P56937	HSD17B7	SDR37C1	Hydroxysteroid (17-beta) dehydrogenase 7	0.1176947032240081	0.6518027814602939	FALSE	FALSE	FALSE
ENOG411CVDG	0	0	0	3	0	1.6780915843162603	0	1.8261233709258722	0	1.5	1.1865899387221046	ENOG411CVDG	Xelaev18014630m.g, Xelaev18035077m.g, Xelaev18011941m.g	Xenbase_9.1	aipl1.S, aip.L, aipl1.L	NA	Q9NZN9, O00170	AIPL1, AIP	AIPL2, XAP2	aryl hydrocarbon receptor interacting	0.1176947032240081	0.6518027814602939	FALSE	FALSE	FALSE
ENOG411CP71	0	0	0	3	0	1.6780915843162603	0	1.8261233709258722	0	1.5	1.1865899387221046	ENOG411CP71	148232184, Xelaev18009335m.g	GenBank, Xenbase_9.1	ccdc109b.S	coiled-coil domain containing 109B [Xenopus laevis], NA	Q9NWR8	MCUB	CCDC109B	Coiled-coil domain containing 109B	0.1176947032240081	0.6518027814602939	FALSE	FALSE	FALSE
ENOG411CPWC	0	0	0	3	0	1.6780915843162603	0	1.8261233709258722	0	1.5	1.1865899387221046	ENOG411CPWC	114107806, 118217, Xelaev18042170m.g, Xelaev18013546m.g, Xelaev18013545m.g	GenBank, Xenbase_9.1	gtsf1.S, gtsf1.L, loc100145274.L	MGC154308 protein [Xenopus laevis], RecName: Full=Protein D7, NA	Q8WW33	GTSF1	FAM112B	Gametocyte specific factor 1	0.1176947032240081	0.6518027814602939	FALSE	FALSE	FALSE
ENOG411CSJV	0	0	0	3	0	1.6780915843162603	0	1.8261233709258722	0	1.5	1.1865899387221046	ENOG411CSJV	148225724, 148229218, Xelaev18037901m.g, Xelaev18022051m.g, Xelaev18024317m.g, Xelaev18017954m.g	GenBank, Xenbase_9.1	cpt1a.S, loc100490391-like.L, loc100490391-like.S, cpt1b.L	carnitine palmitoyltransferase 1A (liver) [Xenopus laevis], carnitine palmitoyltransferase 1B (muscle) [Xenopus laevis], NA	P50416, Q92523, Q8TCG5	CPT1A, CPT1B, CPT1C	CPT1, KIAA1670, CATL1	Carnitine palmitoyltransferase	0.1176947032240081	0.6518027814602939	FALSE	FALSE	FALSE
ENOG411CPRI	0	0	0	3	0	1.6780915843162603	0	1.8261233709258722	0	1.5	1.1865899387221046	ENOG411CPRI	148223852, 148237854, 31074987, Xelaev18024014m.g, Xelaev18025918m.g	GenBank, Xenbase_9.1	nckipsd.L, nckipsd.S	NCK interacting protein with SH3 domain [Xenopus laevis], MGC81740 protein [Xenopus laevis], Figo [Xenopus laevis], NA	Q9NZQ3	NCKIPSD	AF3P21 SPIN90	NCK interacting protein with SH3 domain	0.1176947032240081	0.6518027814602939	FALSE	FALSE	FALSE
ENOG411CQX0	0	0	0	3	0	1.6780915843162603	0	1.8261233709258722	0	1.5	1.1865899387221046	ENOG411CQX0	Xelaev18044821m.g	Xenbase_9.1	usp40.L	NA	Q9NVE5	USP40	NA	ubiquitin specific peptidase 40	0.1176947032240081	0.6518027814602939	FALSE	FALSE	FALSE
ENOG411CUEX	0	0	0	3	0	1.6780915843162603	0	1.8261233709258722	0	1.5	1.1865899387221046	ENOG411CUEX	148233872	GenBank	NA	WD repeat-containing protein 92 [Xenopus laevis]	Q96MX6	WDR92	NA	WD repeat-containing protein	0.1176947032240081	0.6518027814602939	FALSE	FALSE	FALSE
ENOG411CV7C	0	0	0	3	0	1.6780915843162603	0	1.8261233709258722	0	1.5	1.1865899387221046	ENOG411CV7C	Xelaev18015426m.g, Xelaev18012849m.g	Xenbase_9.1	nf1.S, nf1.L	NA	P21359	NF1	NA	Neurofibromin 1	0.1176947032240081	0.6518027814602939	FALSE	FALSE	FALSE
ENOG411CWR6	0	0	0	3	0	1.6780915843162603	0	1.8261233709258722	0	1.5	1.1865899387221046	ENOG411CWR6	Xelaev18010559m.g, Xelaev18007717m.g	Xenbase_9.1	ankle2.S, ankle2.L	NA	Q86XL3	ANKLE2	KIAA0692 LEM4	ankyrin repeat and LEM domain containing 2	0.1176947032240081	0.6518027814602939	FALSE	FALSE	FALSE
ENOG411CSY6	0	0	0	3	0	1.6780915843162603	0	1.8261233709258722	0	1.5	1.1865899387221046	ENOG411CSY6	148230881, 4583429, Xelaev18047550m.g	GenBank, Xenbase_9.1	mad1l1.S	spindle checkpoint protein Xmad1 [Xenopus laevis], NA	Q9Y6D9	MAD1L1	MAD1 TXBP181	MAD1 mitotic arrest deficient-like 1 (yeast)	0.1176947032240081	0.6518027814602939	FALSE	FALSE	FALSE
ENOG411CU3P	0	0	0	3	0	1.6780915843162603	0	1.8261233709258722	0	1.5	1.1865899387221046	ENOG411CU3P	147902900, 148232413, 148233276, Xelaev18002618m.g, Xelaev18038572m.g, Xelaev18021300m.g, Xelaev18041885m.g, Xelaev18017387m.g	GenBank, Xenbase_9.1	Xelaev18002618m.g, Xelaev18038572m.g, nt5dc3.S, Xelaev18041885m.g, nt5dc3.L	hypothetical protein LOC380012 [Xenopus laevis], 5'-nucleotidase domain-containing protein 3 [Xenopus laevis], 5'-nucleotidase domain containing 2 [Xenopus laevis], NA	Q9H857, Q86UY8	NT5DC2, NT5DC3	NA, GNN TU12B1-TY	5'-nucleotidase domain containing	0.1176947032240081	0.6518027814602939	FALSE	FALSE	FALSE
ENOG411CSUW	0	0	0	3	0	1.6780915843162603	0	1.8261233709258722	0	1.5	1.1865899387221046	ENOG411CSUW	147903114	GenBank	NA	protein zwilch homolog [Xenopus laevis]	Q9H900	ZWILCH	NA	Zwilch, kinetochore associated, homolog (Drosophila)	0.1176947032240081	0.6518027814602939	FALSE	FALSE	FALSE
ENOG411CZJP	0	0	0	3	0	1.6780915843162603	0	1.8261233709258722	0	1.5	1.1865899387221046	ENOG411CZJP	147904665, 148229824, Xelaev18043772m.g, Xelaev18002053m.g	GenBank, Xenbase_9.1	Xelaev18043772m.g, Xelaev18002053m.g	solute carrier family 16, member 3 (monocarboxylic acid transporter 4) [Xenopus laevis], NA	NA	NA	NA	Solute carrier family 16, member 3 (Monocarboxylic acid transporter 4)	0.1176947032240081	0.6518027814602939	FALSE	FALSE	FALSE
ENOG411CRC9	0	0	0	3	0	1.6780915843162603	0	1.8261233709258722	0	1.5	1.1865899387221046	ENOG411CRC9	147904140, 148744502, Xelaev18005761m.g, Xelaev18009452m.g	GenBank, Xenbase_9.1	pdlim5.L, pdlim5.S	MGC85532 protein [Xenopus laevis], LOC100101292 protein [Xenopus laevis], NA	Q96HC4	PDLIM5	ENH	PDZ and LIM domain 5	0.1176947032240081	0.6518027814602939	FALSE	FALSE	FALSE
ENOG411CUVJ	0	0	0	3	0	1.6780915843162603	0	1.8261233709258722	0	1.5	1.1865899387221046	ENOG411CUVJ	148226857	GenBank	NA	carbonic anhydrase VB, mitochondrial [Xenopus laevis]	Q9Y2D0, P35218	CA5B, CA5A	NA, CA5	carbonic anhydrase	0.1176947032240081	0.6518027814602939	FALSE	FALSE	FALSE
ENOG411CQY0	0	0	0	3	0	1.6780915843162603	0	1.8261233709258722	0	1.5	1.1865899387221046	ENOG411CQY0	1213275, 147900839, 147907425, 148228330, 148228963, 213623640, 50414687, 509561, 509567, 809528, 9858141, Xelaev18021368m.g, Xelaev18005030m.g, Xelaev18017313m.g, Xelaev18008865m.g	GenBank, Xenbase_9.1	fgfr4.S, fgfr3.L, fgfr4.L, fgfr3.S	FGF receptor 4 [Xenopus laevis], fibroblast growth factor receptor 4 precursor [Xenopus laevis], fibroblast growth factor receptor 3 (achondroplasia, thanatophoric dwarfism) [Xenopus laevis], fibroblast growth factor receptor 3 [Xenopus laevis], FGFR-4c protein [Xenopus laevis], LOC397701 protein [Xenopus laevis], putative protein-tyrosine kinase [Xenopus laevis], fibroblast growth factor recepto…	P22607	FGFR3	JTK4	Fibroblast growth factor receptor	0.1176947032240081	0.6518027814602939	FALSE	FALSE	FALSE
ENOG411CY0J	0	0	0	3	0	1.6780915843162603	0	1.8261233709258722	0	1.5	1.1865899387221046	ENOG411CY0J	125705, 125871, 14627130, 148223327, 148228164, 148231247, 148233834, 148236015, 15321731, 214810, 555569, Xelaev18003086m.g, Xelaev18033632m.g, Xelaev18015084m.g	GenBank, Xenbase_9.1	src.L, yes1.S, fgr.S	RecName: Full=Tyrosine-protein kinase Src-2; AltName: Full=p60-Src-2, RecName: Full=Tyrosine-protein kinase Yes; AltName: Full=p61-Yes, fyn protein [Xenopus laevis], similar to Fyn proto-oncogene [Xenopus laevis], tyrosine-protein kinase Src-1 [Xenopus laevis], tyrosine-protein kinase Yes [Xenopus laevis], uncharacterized protein LOC734720 [Xenopus laevis], tyrosine-protein kinase Src-2 [Xenopus …	P07947, P12931	YES1, SRC	YES, SRC1	V-src sarcoma (Schmidt-Ruppin A-2) viral oncogene homolog (Avian)	0.1176947032240081	0.6518027814602939	FALSE	FALSE	FALSE
ENOG411CZG3	0	0	0	3	0	1.6780915843162603	0	1.8261233709258722	0	1.5	1.1865899387221046	ENOG411CZG3	147899886, 147902314	GenBank	NA	THO complex subunit 5 homolog A [Xenopus laevis], THO complex subunit 5 homolog B [Xenopus laevis]	Q13769	THOC5	C22orf19 KIAA0983	THO complex 5	0.1176947032240081	0.6518027814602939	FALSE	FALSE	FALSE
ENOG411CS5G	1	7	3	11	0.9862276347740007	0.689799609831477	0.9763098939548995	0.41108587164702864	4	7	1.1851302301139375	ENOG411CS5G	148237910, 159155457, 48735421, 50418211, 72679403, Xelaev18035545m.g, Xelaev18037448m.g	GenBank, Xenbase_9.1	zw10.L, zw10.S	ZW10, kinetochore associated, homolog [Xenopus laevis], Zw10 protein [Xenopus laevis], LOC445850 protein [Xenopus laevis], NA	Q96RU2, O43264	USP28, ZW10	KIAA1515, NA	ZW10, kinetochore associated, homolog (Drosophila)	0.11798298014353235	0.6518027814602939	FALSE	FALSE	FALSE
ENOG411CSDC	0	2	1	4	0.9954389325039961	0.6803584288480714	0.9763098939548995	0.5630889650920785	1	2.5	1.18496767810657	ENOG411CSDC	Xelaev18006629m.g	Xenbase_9.1	armc6.L	NA	Q6NXE6	ARMC6	NA	armadillo repeat containing 6	0.1180151133174326	0.6518027814602939	FALSE	FALSE	FALSE
ENOG411CWZ3	0	2	1	4	0.9954389325039961	0.6803584288480714	0.9763098939548995	0.5630889650920785	1	2.5	1.18496767810657	ENOG411CWZ3	Xelaev18002535m.g	Xenbase_9.1	bcl2l13.L	NA	Q9BXK5	BCL2L13	MIL1	BCL2-like 13 (Apoptosis facilitator)	0.1180151133174326	0.6518027814602939	FALSE	FALSE	FALSE
ENOG411CXBJ	0	2	1	4	0.9954389325039961	0.6803584288480714	0.9763098939548995	0.5630889650920785	1	2.5	1.18496767810657	ENOG411CXBJ	148237404	GenBank	NA	family with sequence similarity 98, member A [Xenopus laevis]	Q17RN3	FAM98C	NA	Family with sequence similarity 98, member C	0.1180151133174326	0.6518027814602939	FALSE	FALSE	FALSE
ENOG411CS5H	13	14	21	18	1.325210547639418	0.34956975490303005	0.6283865905345926	0.16716028876093944	13.5	19.5	1.1842485089254227	ENOG411CS5H	116283885, 147902055, 148230088, Xelaev18046025m.g	GenBank, Xenbase_9.1	phb.S	MGC64447 protein [Xenopus laevis], prohibitin [Xenopus laevis], uncharacterized protein LOC379509 [Xenopus laevis], NA	P35232	PHB	NA	Prohibitin	0.11815735248771693	0.6518027814602939	FALSE	FALSE	FALSE
ENOG411CRTV	2	1	3	4	0.42863145307757394	1.2392234788223713	0.3913473932337433	1.1480514658132348	1.5	3.5	1.1793515323818786	ENOG411CRTV	148225528, Xelaev18047506m.g	GenBank, Xenbase_9.1	pdxdc1.S	pyridoxal-dependent decarboxylase domain-containing protein 1 [Xenopus laevis], NA	Q6P474, Q6P996	PDXDC2P, PDXDC1	PDXDC2, KIAA0251	pyridoxal-dependent decarboxylase domain containing 1	0.11912911309025412	0.6518027814602939	FALSE	FALSE	FALSE
ENOG411D423	2	1	3	4	0.42863145307757394	1.2392234788223713	0.3913473932337433	1.1480514658132348	1.5	3.5	1.1793515323818786	ENOG411D423	Xelaev18021044m.g, Xelaev18017670m.g	Xenbase_9.1	ndufa5.S, ndufa5.L	NA	Q16718	NDUFA5	NA	NADH dehydrogenase (Ubiquinone) 1 alpha subcomplex, 5, 13kDa	0.11912911309025412	0.6518027814602939	FALSE	FALSE	FALSE
ENOG411CZSF	1	2	3	4	0.9862276347740007	0.6803584288480714	0.9763098939548995	0.5630889650920785	1.5	3.5	1.1784543070181621	ENOG411CZSF	Xelaev18005278m.g	Xenbase_9.1	scfd2.L	NA	Q8WU76	SCFD2	STXBP1L1	sec1 family domain containing 2	0.1193077691502483	0.6518027814602939	FALSE	FALSE	FALSE
ENOG411DF3S	1	2	3	4	0.9862276347740007	0.6803584288480714	0.9763098939548995	0.5630889650920785	1.5	3.5	1.1784543070181621	ENOG411DF3S	Xelaev18005215m.g	Xenbase_9.1	rfc1.L	NA	P35251	RFC1	RFC140	replication factor C (activator 1) 1, 145kDa	0.1193077691502483	0.6518027814602939	FALSE	FALSE	FALSE
ENOG411CXVU	1	0	1	3	-0.013102639503260374	1.6780915843162603	-0.023690106045100492	1.8261233709258722	0.5	2	1.1773249734779065	ENOG411CXVU	119856, 27924365, 49118982, Xelaev18036567m.g, Xelaev18038075m.g	GenBank, Xenbase_9.1	fbl.L, fbl.S	RecName: Full=rRNA 2'-O-methyltransferase fibrillarin, LOC398434 protein [Xenopus laevis], NA	P22087, A6NHQ2	FBL, FBLL1	FIB1 FLRN, NA	Fibrillarin	0.11953291140266904	0.6518027814602939	FALSE	FALSE	FALSE
ENOG411D0BD	1	0	1	3	-0.013102639503260374	1.6780915843162603	-0.023690106045100492	1.8261233709258722	0.5	2	1.1773249734779065	ENOG411D0BD	148228663, Xelaev18044052m.g	GenBank, Xenbase_9.1	nup85.L	nuclear pore complex protein Nup85 [Xenopus laevis], NA	Q9BW27	NUP85	NUP75 PCNT1	Nucleoporin 85kDa	0.11953291140266904	0.6518027814602939	FALSE	FALSE	FALSE
ENOG411CVRS	1	0	1	3	-0.013102639503260374	1.6780915843162603	-0.023690106045100492	1.8261233709258722	0.5	2	1.1773249734779065	ENOG411CVRS	Xelaev18038396m.g, Xelaev18041601m.g	Xenbase_9.1	tsc1.L, tsc1.S	NA	Q92574	TSC1	KIAA0243 TSC	Tuberous sclerosis 1	0.11953291140266904	0.6518027814602939	FALSE	FALSE	FALSE
ENOG411CT24	1	3	2	7	0.5640392668774026	1.0969321796323708	0.5612723946760559	0.8261233709258723	2	4.5	1.1744841731842897	ENOG411CT24	148223399, Xelaev18032204m.g, Xelaev18033877m.g	GenBank, Xenbase_9.1	esrp1.L, esrp1.S	epithelial splicing regulatory protein 1 [Xenopus laevis], NA	Q6NXG1, Q9H6T0	ESRP1, ESRP2	RBM35A, RBM35B	epithelial splicing regulatory protein	0.12010057381508664	0.6534330995934916	FALSE	FALSE	FALSE
ENOG411CVUP	5	0	5	3	-0.02930263184605214	1.6780915843162603	-0.023690106045100492	1.8261233709258722	2.5	4	1.1658698490371484	ENOG411CVUP	148237594, 27503878, Xelaev18008389m.g	GenBank, Xenbase_9.1	zfr.L	zinc finger RNA-binding protein [Xenopus laevis], Zfr protein [Xenopus laevis], NA	Q96KR1, Q9UPR6	ZFR, ZFR2	NA, KIAA1086	zinc finger RNA binding protein	0.12183353550837128	0.661382049902587	FALSE	FALSE	FALSE
ENOG411CWT8	4	3	5	8	0.30715128444444906	1.3380345033343874	0.23934429978869357	0.9960483723681846	3.5	6.5	1.1633220268501474	ENOG411CWT8	148226246	GenBank	NA	replication factor C (activator 1) 3, 38kDa [Xenopus laevis]	P40938	RFC3	NA	Replication factor C (Activator 1) 3, 38kDa	0.12234943602143847	0.6627034040181254	FALSE	FALSE	FALSE
ENOG411CRBG	14	14	18	22	0.6583923679080874	0.9756925141291132	0.31734681178996643	0.44279473137436676	14	20	1.155472501122924	ENOG411CRBG	117558137, 161611725, 163916100, Xelaev18005005m.g, Xelaev18008845m.g	GenBank, Xenbase_9.1	immt.L, immt.S	LOC100036792 protein [Xenopus laevis], LOC733343 protein [Xenopus laevis], NA	Q16891	IMMT	HMP MIC60 MINOS2	inner membrane protein, mitochondrial	0.12394849362131746	0.669075941756607	FALSE	FALSE	FALSE
ENOG411D1XK	5	8	6	16	0.27225094734893496	1.3609519075855054	0.19870231529134755	0.7436612107338995	6.5	11	1.154848813777372	ENOG411D1XK	148236013, Xelaev18023422m.g	GenBank, Xenbase_9.1	rtca.L	RNA terminal phosphate cyclase domain 1 [Xenopus laevis], NA	O00442	RTCA	RPC RPC1 RTC1 RTCD1	RNA 3'-terminal phosphate cyclase	0.1240761717648971	0.669075941756607	FALSE	FALSE	FALSE
ENOG411D148	0	1	3	1	1.7242131620693701	-0.09588637572323629	1.9763098939548995	-0.17387662907412774	0.5	2	1.1514009126130498	ENOG411D148	148235046, Xelaev18023596m.g, Xelaev18025604m.g	GenBank, Xenbase_9.1	kifap3.L, kifap3.S	kinesin-associated protein 3 [Xenopus laevis], NA	Q92845	KIFAP3	KIF3AP SMAP	kinesin-associated protein 3	0.12478366928317643	0.6714023975590379	FALSE	FALSE	FALSE
ENOG411CU5T	0	5	1	8	0.9954389325039961	0.6181379683056818	0.9763098939548995	0.41108587164702837	2.5	4.5	1.1409711685284962	ENOG411CU5T	148223485, Xelaev18027101m.g, Xelaev18029182m.g	GenBank, Xenbase_9.1	hbs1l.L, Xelaev18029182m.g	HBS1-like [Xenopus laevis], NA	Q9Y450	HBS1L	HBS1 KIAA1038	Hbs1-like (S. cerevisiae)	0.12694096057082607	0.6815020223140155	FALSE	FALSE	FALSE
ENOG411CPMV	0	4	0	11	0	1.6112190058819011	0	1.089157776759666	2	5.5	1.13930388503574	ENOG411CPMV	161611758, Xelaev18029655m.g, Xelaev18027517m.g, Xelaev18029657m.g, Xelaev18027518m.g	GenBank, Xenbase_9.1	bdh1.S, bdh1.L, loc100497276-like.S, loc100497276-like.L	LOC100127326 protein [Xenopus laevis], NA	Q02338	BDH1	BDH SDR9C1	3-hydroxybutyrate dehydrogenase, type 1	0.12728821427247658	0.6818610949574075	FALSE	FALSE	FALSE
ENOG411CTER	0	2	3	2	1.7242131620693701	-0.13560641488097533	1.9763098939548995	-0.17387662907412774	1	2.5	1.1233146035756172	ENOG411CTER	147903637, 147903829, Xelaev18026762m.g, Xelaev18040015m.g, Xelaev18041002m.g	GenBank, Xenbase_9.1	strn.L, strn3.L, strn3.S	striatin, calmodulin binding protein 3 [Xenopus laevis], striatin, calmodulin binding protein [Xenopus laevis], NA	O43815, Q13033, Q9NRL3	STRN, STRN3, STRN4	NA, GS2NA SG2NA, ZIN	Striatin, calmodulin binding protein	0.13065195186259135	0.6902835759681109	FALSE	FALSE	FALSE
ENOG411CSFA	0	2	3	2	1.7242131620693701	-0.13560641488097533	1.9763098939548995	-0.17387662907412774	1	2.5	1.1233146035756172	ENOG411CSFA	296439270, 353703748, 50418040, 52354758, Xelaev18029023m.g, Xelaev18026773m.g	GenBank, Xenbase_9.1	phf10.S, phf10.L	RecName: Full=PHD finger protein 10, PHD finger protein 10 [Xenopus laevis], MGC82172 protein [Xenopus laevis], LOC494765 protein [Xenopus laevis], NA	Q8WUB8	PHF10	BAF45A	PHD finger protein 10	0.13065195186259135	0.6902835759681109	FALSE	FALSE	FALSE
ENOG411CS9M	23	33	29	45	0.7698649063085145	0.8102961432878878	0.2982379888422617	0.262222485732546	28	37	1.1173425935364685	ENOG411CS9M	148744489, Xelaev18011482m.g	GenBank, Xenbase_9.1	gart.L	LOC100101294 protein [Xenopus laevis], NA	P22102	GART	PGFT PRGS	Phosphoribosylglycinamide formyltransferase, phosphoribosylglycinamide synthetase, phosphoribosylaminoimidazole synthetase	0.13192393514526046	0.6902835759681109	FALSE	FALSE	FALSE
ENOG411CVBZ	52	94	57	125	0.3851914470835541	1.1706001144438336	0.10637043451927242	0.233547686094841	73	91	1.1001107632688234	ENOG411CVBZ	148231021, Xelaev18015280m.g, Xelaev18007676m.g, Xelaev18010521m.g	GenBank, Xenbase_9.1	cltc.S, cltcl1.L, cltcl1.S	clathrin, heavy chain (Hc) [Xenopus laevis], NA	Q00610, P53675	CLTC, CLTCL1	CLH17 CLTCL2 KIAA0034, CLH22 CLTCL CLTD	Clathrin, heavy	0.13564193239711977	0.6902835759681109	FALSE	FALSE	FALSE
ENOG411CS0R	28	44	34	59	0.6933991554710915	0.8448512980954069	0.24761191577229383	0.241160870204716	36	46.5	1.0877073268801534	ENOG411CS0R	148222150, 148224496, 148227844, 148230849, 28422226, 963083, 963085, Xelaev18035488m.g	GenBank, Xenbase_9.1	pdgfb-like.L	protein phosphatase 2, regulatory subunit A, alpha [Xenopus laevis], similar to phosphorylase phosphatase [Xenopus laevis], protein phosphatase 2, regulatory subunit A, beta [Xenopus laevis], LOC398563 protein [Xenopus laevis], phosphorylase phosphatase [Xenopus laevis], NA	P30154, P30153	PPP2R1B, PPP2R1A	NA	protein phosphatase 2, regulatory subunit A	0.13836216608188845	0.6902835759681109	FALSE	FALSE	FALSE
ENOG411CZQD	0	6	1	9	0.9954389325039961	0.5404490537529347	0.9763098939548995	0.34069654375563063	3	5	1.0860368102252267	ENOG411CZQD	Xelaev18013682m.g, Xelaev18016136m.g	Xenbase_9.1	mrps31.L, mrps31.S	NA	Q92665	MRPS31	IMOGN38	Mitochondrial ribosomal protein S31	0.13873135344450632	0.6902835759681109	FALSE	FALSE	FALSE
ENOG411CQTX	0	1	0	5	0	1.5268033056798456	0	1.4110858716470287	0.5	2.5	1.079612970984256	ENOG411CQTX	Xelaev18035954m.g, Xelaev18037724m.g	Xenbase_9.1	arhgef1.L, arhgef1.S	NA	Q92888	ARHGEF1	NA	Rho guanine nucleotide exchange factor (GEF) 1	0.14015728146346043	0.6902835759681109	FALSE	FALSE	FALSE
ENOG411CQF9	0	1	0	5	0	1.5268033056798456	0	1.4110858716470287	0.5	2.5	1.079612970984256	ENOG411CQF9	Xelaev18047339m.g, Xelaev18044899m.g	Xenbase_9.1	raph1.S, raph1.L	NA	Q70E73	RAPH1	ALS2CR18 ALS2CR9 KIAA1681 LPD PREL2 RMO1	Ras association (RalGDS AF-6) and pleckstrin homology domains 1	0.14015728146346043	0.6902835759681109	FALSE	FALSE	FALSE
ENOG411CT7K	0	1	0	5	0	1.5268033056798456	0	1.4110858716470287	0.5	2.5	1.079612970984256	ENOG411CT7K	1333645, 13992583, 147900670, 147901612, Xelaev18011112m.g, Xelaev18008466m.g, Xelaev18020422m.g	GenBank, Xenbase_9.1	smad2.S, smad2.L, smad3.S	Mad2 [Xenopus laevis], SMAD3 [Xenopus laevis], SMAD family member 2 [Xenopus laevis], Mad2 protein [Xenopus laevis], NA	Q15796, P84022	SMAD2, SMAD3	MADH2 MADR2, MADH3	SMAD family member	0.14015728146346043	0.6902835759681109	FALSE	FALSE	FALSE
ENOG411D1CM	2	4	4	7	0.797715257795012	0.7128635411165034	0.7132754881211057	0.50419527603851	3	5.5	1.0681405122269625	ENOG411D1CM	148229557, Xelaev18006654m.g	GenBank, Xenbase_9.1	srp72.L	signal recognition particle 72kDa [Xenopus laevis], NA	O76094	SRP72	NA	Signal-recognition-particle assembly has a crucial role in targeting secretory proteins to the rough endoplasmic reticulum membrane (By similarity)	0.1427285669194072	0.6902835759681109	FALSE	FALSE	FALSE
ENOG411CUEV	2	1	2	5	-0.018530600660750022	1.5268033056798456	-0.023690106045100492	1.4110858716470287	1.5	3.5	1.0665098575975798	ENOG411CUEV	218527092, Xelaev18013421m.g, Xelaev18030206m.g, Xelaev18001256m.g, Xelaev18031692m.g, Xelaev18000153m.g, Xelaev18013419m.g, Xelaev18028249m.g, Xelaev18002763m.g	GenBank, Xenbase_9.1	Xelaev18013421m.g, kif13b.S, loc100490325.1, kif13a-like.L, loc100488116.L, Xelaev18013419m.g, kif13b.L, kif13a.S	kinesin 13B [Xenopus laevis], NA	Q9NQT8, Q9H1H9	KIF13B, KIF13A	GAKIN KIAA0639, RBKIN	Kinesin family member	0.1430966124972509	0.6902835759681109	FALSE	FALSE	FALSE
ENOG411CTT5	2	5	3	10	0.42863145307757394	1.075834029817418	0.3913473932337433	0.7005924888420134	3.5	6.5	1.0638177450161426	ENOG411CTT5	148234433	GenBank	NA	dehydrogenase/reductase (SDR family) member 13 [Xenopus laevis]	Q6UX07	DHRS13	SDR7C5	Dehydrogenase reductase (SDR family) member 13	0.14370563551091173	0.6902835759681109	FALSE	FALSE	FALSE
ENOG411CSY9	11	18	12	30	0.16512850206423402	1.3263518902507216	0.09178711137483554	0.532392167869162	14.5	21	1.0546358994126774	ENOG411CSY9	147905097, 51703709, Xelaev18005678m.g, Xelaev18037141m.g, Xelaev18034885m.g, Xelaev18009370m.g	GenBank, Xenbase_9.1	sec24d-like.1.L, sec24d-like.2.S, sec24d-like.2.L, sec24d-like.1.S	SEC24 family, member D [Xenopus laevis], LOC446945 protein [Xenopus laevis], NA	P53992, O94855	SEC24C, SEC24D	KIAA0079, KIAA0755	SEC24 family, member	0.1457959392712965	0.6902835759681109	FALSE	FALSE	FALSE
ENOG411DD9H	0	6	3	6	1.7242131620693701	-0.23489522939813035	1.9763098939548995	-0.17387662907412774	3	4.5	1.0531068095345637	ENOG411DD9H	147903539, Xelaev18002199m.g	GenBank, Xenbase_9.1	Xelaev18002199m.g	protein phosphatase 1, catalytic subunit, alpha isozyme [Xenopus laevis], NA	NA	NA	NA	Protein phosphatase that associates with over 200 regulatory proteins to form highly specific holoenzymes which dephosphorylate hundreds of biological targets. Protein phosphatase 1 (PP1) is essential for cell division, and participates in the regulation of glycogen metabolism, muscle contractility and protein synthesis. Involved in regulation of ionic conductances and long-term synaptic plastici…	0.14614602114366138	0.6902835759681109	FALSE	FALSE	FALSE
ENOG411CTN5	0	1	1	2	0.9954389325039961	0.48107221241408954	0.9763098939548995	0.41108587164702864	0.5	1.5	1.0440510430690915	ENOG411CTN5	153792420, 2811268, 2811270, Xelaev18041769m.g, Xelaev18018880m.g, Xelaev18002850m.g	GenBank, Xenbase_9.1	stxbp1.S, stxbp2.L, stxbp1.L	syntaxin binding protein 1 [Xenopus laevis], unc-18, partial [Xenopus laevis], unc-18 [Xenopus laevis], NA	P61764, Q15833	STXBP1, STXBP2	UNC18A, UNC18B	syntaxin binding protein	0.1482308872962676	0.6902835759681109	FALSE	FALSE	FALSE
ENOG411CVN3	0	1	1	2	0.9954389325039961	0.48107221241408954	0.9763098939548995	0.41108587164702864	0.5	1.5	1.0440510430690915	ENOG411CVN3	148223497, Xelaev18035429m.g	GenBank, Xenbase_9.1	vps11.L	vacuolar protein sorting 11 homolog [Xenopus laevis], NA	Q9H270	VPS11	RNF108	vacuolar protein sorting 11 homolog (S. cerevisiae)	0.1482308872962676	0.6902835759681109	FALSE	FALSE	FALSE
ENOG411CZ9T	0	1	1	2	0.9954389325039961	0.48107221241408954	0.9763098939548995	0.41108587164702864	0.5	1.5	1.0440510430690915	ENOG411CZ9T	Xelaev18011284m.g, Xelaev18014432m.g	Xenbase_9.1	fam162a.L, fam162a.S	NA	Q96A26	FAM162A	C3orf28 E2IG5	Family with sequence similarity 162, member	0.1482308872962676	0.6902835759681109	FALSE	FALSE	FALSE
ENOG411CQJB	1	4	4	5	1.3273307913105068	0.14215024006098273	1.298237988842262	0.08915777675966605	2.5	4.5	1.039080002107782	ENOG411CQJB	111185521, 148229164, 148237380, Xelaev18016095m.g	GenBank, Xenbase_9.1	Xelaev18016095m.g	Gpd1 protein [Xenopus laevis], MGC83663 protein [Xenopus laevis], glycerol-3-phosphate dehydrogenase 1-like protein [Xenopus laevis], NA	Q8N335, P21695	GPD1L, GPD1	KIAA0089, NA	Glycerol-3-phosphate dehydrogenase	0.1493837653281077	0.6902835759681109	FALSE	FALSE	FALSE
ENOG411CTJ6	19	29	17	50	-0.39073739225336496	1.8479806295466257	-0.17569319949015044	0.5916581172888493	24	33.5	1.0304265749283017	ENOG411CTJ6	148226749, 148229563	GenBank	NA	insulin-like growth factor 2 mRNA-binding protein 3-A [Xenopus laevis], insulin-like growth factor 2 mRNA-binding protein 3-B [Xenopus laevis]	Q9NZI8, O00425, Q9Y6M1	IGF2BP1, IGF2BP3, IGF2BP2	CRDBP VICKZ1 ZBP1, IMP3 KOC1 VICKZ3, IMP2 VICKZ2	insulin-like growth factor 2 mRNA binding protein	0.15140490177678406	0.6902835759681109	FALSE	FALSE	FALSE
ENOG411CV8A	4	10	8	13	1.1282621718377197	0.323361302108997	0.8243068005098495	0.1740466743461794	7	10.5	1.026452802157297	ENOG411CV8A	148223219, 34536536, Xelaev18010061m.g	GenBank, Xenbase_9.1	tyrp1.S	tyrosinase-related protein 1 precursor [Xenopus laevis], tyrosinase-related protein 1 [Xenopus laevis], NA	P17643	TYRP1	CAS2 TYRP TYRRP	Tyrosinase-related protein 1	0.15233910000438733	0.6902835759681109	FALSE	FALSE	FALSE
ENOG411CX71	7	18	7	31	-0.03467385035135413	1.4512283078866286	-0.023690106045100492	0.5781958574822866	12.5	19	1.0016552628432238	ENOG411CX71	148226986, Xelaev18027786m.g, Xelaev18029862m.g	GenBank, Xenbase_9.1	farsb.L, farsb.S	phenylalanyl-tRNA synthetase, beta subunit [Xenopus laevis], NA	Q9NSD9	FARSB	FARSLB FRSB	Phenylalanyl-tRNA synthetase, beta subunit	0.15825506026906008	0.6902835759681109	FALSE	FALSE	FALSE
ENOG411CWXH	2	6	5	8	1.11483555352971	0.3004500671687308	0.9763098939548995	0.18869345031058032	4	6.5	1.0007580597116796	ENOG411CWXH	148233274, Xelaev18019685m.g, Xelaev18016577m.g	GenBank, Xenbase_9.1	strap.S, strap.L	serine/threonine kinase receptor associated protein [Xenopus laevis], NA	NA	NA	NA	serine threonine kinase receptor associated protein	0.1584718951985726	0.6902835759681109	FALSE	FALSE	FALSE
ENOG411CZHU	0	0	2	0	1.407788694550312	0	1.561272394676056	0	0	1	0.9954569323942828	ENOG411CZHU	62825931, Xelaev18033190m.g, Xelaev18031131m.g	GenBank, Xenbase_9.1	dnajc13.S, dnajc13.L	LOC733226 protein [Xenopus laevis], NA	O75165	DNAJC13	KIAA0678 RME8	DnaJ (Hsp40) homolog, subfamily C, member 13	0.15975704035589497	0.6902835759681109	FALSE	FALSE	FALSE
ENOG411CXME	0	0	2	0	1.407788694550312	0	1.561272394676056	0	0	1	0.9954569323942828	ENOG411CXME	1325970, 1373400, 1389556, Xelaev18046335m.g	GenBank, Xenbase_9.1	Xelaev18046335m.g	TFIIS elongation factor [Xenopus laevis], transcription elongation factor type xTFIIS.l [Xenopus laevis], transcriptional factor [Xenopus laevis], NA	P23193, Q15560	TCEA1, TCEA2	GTF2S TFIIS, NA	transcription elongation factor A (SII)	0.15975704035589497	0.6902835759681109	FALSE	FALSE	FALSE
ENOG411CPNQ	0	0	2	0	1.407788694550312	0	1.561272394676056	0	0	1	0.9954569323942828	ENOG411CPNQ	169642137, Xelaev18027241m.g, Xelaev18020311m.g, Xelaev18018578m.g	GenBank, Xenbase_9.1	Xetrov90013451m.L, snrnp200.S, snrnp200.L	LOC100158290 protein [Xenopus laevis], NA	Q8N3C0, O75643	ASCC3, SNRNP200	HELIC1, ASCC3L1 HELIC2 KIAA0788	activating signal cointegrator 1 complex subunit 3	0.15975704035589497	0.6902835759681109	FALSE	FALSE	FALSE
ENOG411CWZF	0	0	2	0	1.407788694550312	0	1.561272394676056	0	0	1	0.9954569323942828	ENOG411CWZF	Xelaev18009744m.g	Xenbase_9.1	gak.S	NA	O14976	GAK	NA	cyclin G associated kinase	0.15975704035589497	0.6902835759681109	FALSE	FALSE	FALSE
ENOG411D3JH	0	0	2	0	1.407788694550312	0	1.561272394676056	0	0	1	0.9954569323942828	ENOG411D3JH	148231724	GenBank	NA	ring finger protein 7 [Xenopus laevis]	Q9UBF6	RNF7	RBX2 ROC2 SAG	Ring finger protein 7	0.15975704035589497	0.6902835759681109	FALSE	FALSE	FALSE
ENOG411CPFG	0	0	2	0	1.407788694550312	0	1.561272394676056	0	0	1	0.9954569323942828	ENOG411CPFG	50414934, 66910677, 76779436, Xelaev18012987m.g, Xelaev18021468m.g, Xelaev18038850m.g, Xelaev18005926m.g, Xelaev18017185m.g, Xelaev18042178m.g, Xelaev18002005m.g	GenBank, Xenbase_9.1	aff3-like.2.L, aff4.S, aff2.L, aff1.L, aff4.L, aff2.S, aff1.S	LOC446225 protein [Xenopus laevis], NA	P51816, Q9UHB7, P51826, P51825	AFF2, AFF4, AFF3, AFF1	FMR2 OX19, AF5Q31 MCEF, LAF4, AF4 FEL MLLT2 PBM1	AF4 FMR2 family, member	0.15975704035589497	0.6902835759681109	FALSE	FALSE	FALSE
ENOG411D04R	0	0	2	0	1.407788694550312	0	1.561272394676056	0	0	1	0.9954569323942828	ENOG411D04R	118835676, 27694742, 54648323, Xelaev18040817m.g	GenBank, Xenbase_9.1	hax1.L	MGC53078 protein [Xenopus laevis], NA	O00165	HAX1	HS1BP1	HCLS1 associated protein X-1	0.15975704035589497	0.6902835759681109	FALSE	FALSE	FALSE
ENOG411D4EX	0	0	2	0	1.407788694550312	0	1.561272394676056	0	0	1	0.9954569323942828	ENOG411D4EX	104115, 104116, 148222021, Xelaev18009818m.g, Xelaev18006280m.g, Xelaev18006281m.g, Xelaev18009806m.g, Xelaev18006278m.g, Xelaev18009817m.g, Xelaev18009812m.g, Xelaev18009807m.g, Xelaev18009809m.g, Xelaev18009814m.g, Xelaev18009803m.g, Xelaev18006277m.g, Xelaev18009813m.g, Xelaev18009805m.g, Xelaev18009804m.g, Xelaev18006282m.g, Xelaev18006279m.g, Xelaev18009811m.g, Xelaev18006276m.g, Xelaev18009…	GenBank, Xenbase_9.1	Xelaev18009818m.g, Xelaev18006280m.g, Xelaev18006281m.g, Xelaev18009806m.g, Xelaev18006278m.g, Xelaev18009817m.g, Xelaev18009812m.g, Xetrov90001502m.S, Xelaev18009809m.g, Xelaev18009814m.g, Xetrov90001500m.S, Xelaev18006277m.g, Xelaev18009813m.g, Xelaev18009805m.g, Xetrov90001499m.S, Xetrov90001506m.L, Xelaev18006279m.g, Xelaev18009811m.g, Xetrov90001502m.L, Xelaev18009810m.g, Xelaev18006283m.g, …	Ig kappa chain - African clawed frog, MGC82134 protein precursor [Xenopus laevis], NA	NA	NA	NA	Immunoglobulin V-set domain	0.15975704035589497	0.6902835759681109	FALSE	FALSE	FALSE
ENOG411CXTN	11	12	12	21	0.16512850206423402	1.23497659317958	0.09178711137483554	0.5851152714220775	11.5	16.5	0.9900238072207379	ENOG411CXTN	148223229, 148227437, 66269745, 66269747, 66269749, 9247090, Xelaev18021149m.g, Xelaev18024673m.g	GenBank, Xenbase_9.1	nap1l1.S, nap1l4.S	nucleosome assembly protein 1-like 1-A [Xenopus laevis], nucleosome assembly protein 1-like 1-B [Xenopus laevis], nucleosome assembly protein 1 p56B [Xenopus laevis], nucleosome assembly protein 1 p60A [Xenopus laevis], nucleosome assembly protein 1 p56A [Xenopus laevis], nucleosome assembly protein 1 [Xenopus laevis], NA	P55209, Q99733	NAP1L1, NAP1L4	NRP, NAP2	nucleosome assembly protein 1-like	0.16108124132436633	0.6902835759681109	FALSE	FALSE	FALSE
ENOG411CTDA	1	3	2	6	0.5640392668774026	0.8332894809395722	0.5612723946760559	0.6334782929834764	2	4	0.9880606331282901	ENOG411CTDA	171847166, 315192413, 315192415, 315192419, 315192427, 315192431, Xelaev18003710m.g	GenBank, Xenbase_9.1	mogs.L	LOC100158418 protein [Xenopus laevis], Mogs [Xenopus laevis], NA	Q13724	MOGS	GCS1	mannosyl-oligosaccharide glucosidase	0.16156147705264282	0.6902835759681109	FALSE	FALSE	FALSE
ENOG411CQI4	9	12	12	18	0.6154989759055486	0.764420418164608	0.3548215172086294	0.37361116622836604	10.5	15	0.9757503610378394	ENOG411CQI4	148230098	GenBank	NA	adaptor-related protein complex 2, mu 1 subunit [Xenopus laevis]	Q96CW1	AP2M1	CLAPM1 KIAA0109	Adaptor-related protein complex 2, mu 1 subunit	0.16459409447044315	0.6902835759681109	FALSE	FALSE	FALSE
ENOG411CUAM	0	0	0	2	0	1.3701428965181228	0	1.4110858716470287	0	1	0.9688373333225426	ENOG411CUAM	197245589, Xelaev18016200m.g, Xelaev18013749m.g	GenBank, Xenbase_9.1	pan3.S, pan3.L	Unknown (protein for MGC:179832) [Xenopus laevis], NA	Q58A45	PAN3	NA	PAN3 poly(A) specific ribonuclease subunit homolog (S. cerevisiae)	0.1663131781449085	0.6902835759681109	FALSE	FALSE	FALSE
ENOG411CUF6	0	0	0	2	0	1.3701428965181228	0	1.4110858716470287	0	1	0.9688373333225426	ENOG411CUF6	Xelaev18018579m.g, Xelaev18020310m.g	Xenbase_9.1	nup133.L, nup133.S	NA	Q8WUM0	NUP133	NA	Nucleoporin 133kDa	0.1663131781449085	0.6902835759681109	FALSE	FALSE	FALSE
ENOG411CR6A	0	0	0	2	0	1.3701428965181228	0	1.4110858716470287	0	1	0.9688373333225426	ENOG411CR6A	Xelaev18046411m.g	Xenbase_9.1	cog1.S	NA	Q8WTW3, A0A087WVI0	COG1	KIAA1381 LDLB, NA	component of oligomeric golgi complex 1	0.1663131781449085	0.6902835759681109	FALSE	FALSE	FALSE
ENOG411CQEC	0	0	0	2	0	1.3701428965181228	0	1.4110858716470287	0	1	0.9688373333225426	ENOG411CQEC	133263, 147901031, Xelaev18010325m.g	GenBank, Xenbase_9.1	hnrnpc.S	RecName: Full=Heterogeneous nuclear ribonucleoprotein C; Short=hnRNP C; AltName: Full=hnRNP core protein C, heterogeneous nuclear ribonucleoprotein C (C1/C2) [Xenopus laevis], NA	P07910, O60812, B2RXH8, B7ZW38, P0DMR1, A0A0G2JPF8, A0A0G2JNQ3, Q86SE5	HNRNPC, HNRNPCL1, HNRNPCL2, HNRNPCL3, HNRNPCL4, RALYL	HNRPC, HNRPCL1, HNRNPCP5, NA, HNRPCL3	RALY RNA binding protein-like	0.1663131781449085	0.6902835759681109	FALSE	FALSE	FALSE
ENOG411CSIC	0	0	0	2	0	1.3701428965181228	0	1.4110858716470287	0	1	0.9688373333225426	ENOG411CSIC	147906538, 50415131, Xelaev18006916m.g	GenBank, Xenbase_9.1	vps13a.L	vacuolar protein sorting 13 homolog A [Xenopus laevis], LOC445856 protein [Xenopus laevis], NA	Q96RL7	VPS13A	CHAC KIAA0986	vacuolar protein sorting 13 homolog A (S. cerevisiae)	0.1663131781449085	0.6902835759681109	FALSE	FALSE	FALSE
ENOG411DETQ	0	0	0	2	0	1.3701428965181228	0	1.4110858716470287	0	1	0.9688373333225426	ENOG411DETQ	147905556, 77748284, Xelaev18014199m.g, Xelaev18011645m.g	GenBank, Xenbase_9.1	tbl2.S, tbl2.L	transducin (beta)-like 2 [Xenopus laevis], Unknown (protein for MGC:130821) [Xenopus laevis], NA	NA	NA	NA	Transducin (Beta)-like 2	0.1663131781449085	0.6902835759681109	FALSE	FALSE	FALSE
ENOG411CRI5	0	0	0	2	0	1.3701428965181228	0	1.4110858716470287	0	1	0.9688373333225426	ENOG411CRI5	147902404, Xelaev18044663m.g	GenBank, Xenbase_9.1	fastkd1.L	FAST kinase domain-containing protein 1 [Xenopus laevis], NA	Q53R41	FASTKD1	KIAA1800	FAST kinase domains 1	0.1663131781449085	0.6902835759681109	FALSE	FALSE	FALSE
ENOG411CX4A	0	0	0	2	0	1.3701428965181228	0	1.4110858716470287	0	1	0.9688373333225426	ENOG411CX4A	148228028, Xelaev18046079m.g, Xelaev18043329m.g	GenBank, Xenbase_9.1	cdc27.S, cdc27.L	cell division cycle 27 homolog [Xenopus laevis], NA	P30260	CDC27	ANAPC3 D0S1430E D17S978E	Cell division cycle 27 homolog (S. cerevisiae)	0.1663131781449085	0.6902835759681109	FALSE	FALSE	FALSE
ENOG411CTKS	0	0	0	2	0	1.3701428965181228	0	1.4110858716470287	0	1	0.9688373333225426	ENOG411CTKS	147906877, Xelaev18035354m.g, Xelaev18037432m.g	GenBank, Xenbase_9.1	foxred1.L, foxred1.S	FAD-dependent oxidoreductase domain-containing protein 1 [Xenopus laevis], NA	Q96CU9	FOXRED1	NA	FAD-dependent oxidoreductase domain containing 1	0.1663131781449085	0.6902835759681109	FALSE	FALSE	FALSE
ENOG411D0C8	0	0	0	2	0	1.3701428965181228	0	1.4110858716470287	0	1	0.9688373333225426	ENOG411D0C8	Xelaev18003564m.g	Xenbase_9.1	vps9d1.L	NA	Q9Y2B5	VPS9D1	ATPBL C16orf7	VPS9 domain containing 1	0.1663131781449085	0.6902835759681109	FALSE	FALSE	FALSE
ENOG411CT71	0	0	0	2	0	1.3701428965181228	0	1.4110858716470287	0	1	0.9688373333225426	ENOG411CT71	Xelaev18035193m.g	Xenbase_9.1	mtor.L	NA	P42345	MTOR	FRAP FRAP1 FRAP2 RAFT1 RAPT1	mechanistic target of rapamycin (serine threonine kinase)	0.1663131781449085	0.6902835759681109	FALSE	FALSE	FALSE
ENOG411DGFM	0	0	0	2	0	1.3701428965181228	0	1.4110858716470287	0	1	0.9688373333225426	ENOG411DGFM	148234561, 285026463, 52138970, 6172234, 6172236, 63146277, Xelaev18046188m.g, Xelaev18043463m.g	GenBank, Xenbase_9.1	sall4.S, sall4.L	sal-like 4 [Xenopus laevis], zinc finger transcription factor SALL4 b [Xenopus laevis], SALL4 protein [Xenopus laevis], Xsal-3 short form [Xenopus laevis], Xsal-3' long form [Xenopus laevis], Unknown (protein for MGC:115268) [Xenopus laevis], NA	NA	NA	NA	sal-like 4 (Drosophila)	0.1663131781449085	0.6902835759681109	FALSE	FALSE	FALSE
ENOG411CQKX	0	0	0	2	0	1.3701428965181228	0	1.4110858716470287	0	1	0.9688373333225426	ENOG411CQKX	49903415, 52354715, Xelaev18010623m.g, Xelaev18007805m.g	GenBank, Xenbase_9.1	clip1.S, clip1.L	LOC445831 protein [Xenopus laevis], LOC494731 protein [Xenopus laevis], NA	NA	NA	NA	CAP-GLY domain containing linker protein 1	0.1663131781449085	0.6902835759681109	FALSE	FALSE	FALSE
ENOG411CQG9	0	0	0	2	0	1.3701428965181228	0	1.4110858716470287	0	1	0.9688373333225426	ENOG411CQG9	125858108, 62739384, Xelaev18011529m.g	GenBank, Xenbase_9.1	ltn1.L	Unknown (protein for IMAGE:8542577) [Xenopus laevis], LOC733217 protein [Xenopus laevis], NA	O94822	LTN1	C21orf10 C21orf98 KIAA0714 RNF160 ZNF294	listerin E3 ubiquitin protein ligase 1	0.1663131781449085	0.6902835759681109	FALSE	FALSE	FALSE
ENOG411CXGH	0	0	0	2	0	1.3701428965181228	0	1.4110858716470287	0	1	0.9688373333225426	ENOG411CXGH	148226104, Xelaev18010037m.g	GenBank, Xenbase_9.1	ift74.S	intraflagellar transport 74 homolog [Xenopus laevis], NA	Q96LB3	IFT74	CCDC2 CMG1	Intraflagellar transport 74 homolog (Chlamydomonas)	0.1663131781449085	0.6902835759681109	FALSE	FALSE	FALSE
ENOG411DF3H	0	0	0	2	0	1.3701428965181228	0	1.4110858716470287	0	1	0.9688373333225426	ENOG411DF3H	148226775, 213625334, 52693902, Xelaev18028151m.g	GenBank, Xenbase_9.1	tdrd6.L	tudor domain containing 6 [Xenopus laevis], Xtr protein [Xenopus laevis], tudor repeat protein Xtr [Xenopus laevis], NA	NA	NA	NA	Tudor domain containing 6	0.1663131781449085	0.6902835759681109	FALSE	FALSE	FALSE
ENOG411D5MH	0	0	0	2	0	1.3701428965181228	0	1.4110858716470287	0	1	0.9688373333225426	ENOG411D5MH	163916135, Xelaev18007412m.g	GenBank, Xenbase_9.1	Xelaev18007412m.g	LOC100137668 protein [Xenopus laevis], NA	Q9UDW1	UQCR10	UCRC	ubiquinol-cytochrome c reductase, complex III subunit X	0.1663131781449085	0.6902835759681109	FALSE	FALSE	FALSE
ENOG411DFES	0	0	0	2	0	1.3701428965181228	0	1.4110858716470287	0	1	0.9688373333225426	ENOG411DFES	147907316, 148223275, 169642556, Xelaev18027567m.g	GenBank, Xenbase_9.1	tbl1xr1.L	F-box-like/WD repeat-containing protein TBL1XR1-B [Xenopus laevis], F-box-like/WD repeat-containing protein TBL1XR1-A [Xenopus laevis], LOC398608 protein [Xenopus laevis], NA	Q9BZK7	TBL1XR1	IRA1 TBLR1	transducin (beta)-like 1 X-linked receptor 1	0.1663131781449085	0.6902835759681109	FALSE	FALSE	FALSE
ENOG411D3P8	0	0	0	2	0	1.3701428965181228	0	1.4110858716470287	0	1	0.9688373333225426	ENOG411D3P8	148231117, Xelaev18023653m.g	GenBank, Xenbase_9.1	dnal4.L	dynein, axonemal, light chain 4 [Xenopus laevis], NA	O96015	DNAL4	NA	Dynein, axonemal, light chain 4	0.1663131781449085	0.6902835759681109	FALSE	FALSE	FALSE
ENOG411CR5G	0	0	0	2	0	1.3701428965181228	0	1.4110858716470287	0	1	0.9688373333225426	ENOG411CR5G	147906425, 288557296, 97181299, Xelaev18037787m.g, Xelaev18036054m.g, Xelaev18016855m.g	GenBank, Xenbase_9.1	Xelaev18037787m.g, Xelaev18036054m.g, ric8b.L	resistance to inhibitors of cholinesterase 8 homolog A [Xenopus laevis], synembryn-A [Xenopus laevis], RecName: Full=Synembryn-A; AltName: Full=Protein Ric-8A, NA	Q9NVN3, Q9NPQ8	RIC8B, RIC8A	NA	Resistance to inhibitors of cholinesterase 8 homolog	0.1663131781449085	0.6902835759681109	FALSE	FALSE	FALSE
ENOG411CZI9	0	0	0	2	0	1.3701428965181228	0	1.4110858716470287	0	1	0.9688373333225426	ENOG411CZI9	351721825, 50927247, Xelaev18046338m.g	GenBank, Xenbase_9.1	prpf6.S	PRP6 pre-mRNA processing factor 6 homolog [Xenopus laevis], MGC80263 protein [Xenopus laevis], NA	O94906	PRPF6	C20orf14	PRP6 pre-mRNA processing factor 6 homolog (S. cerevisiae)	0.1663131781449085	0.6902835759681109	FALSE	FALSE	FALSE
ENOG411CQMH	0	0	0	2	0	1.3701428965181228	0	1.4110858716470287	0	1	0.9688373333225426	ENOG411CQMH	147906809, 213623422, 54038334, Xelaev18038707m.g, Xelaev18015709m.g, Xelaev18013190m.g, Xelaev18038702m.g, Xelaev18038693m.g	GenBank, Xenbase_9.1	Xelaev18038707m.g, irg1.S, irg1.L, Xelaev18038702m.g, Xelaev18038693m.g	immunoresponsive gene 1 [Xenopus laevis], XIRG protein-like [Xenopus laevis], Unknown (protein for MGC:98823) [Xenopus laevis], NA	A6NK06	ACOD1	IRG1	immunoresponsive 1 homolog (mouse)	0.1663131781449085	0.6902835759681109	FALSE	FALSE	FALSE
ENOG411CRY1	0	0	0	2	0	1.3701428965181228	0	1.4110858716470287	0	1	0.9688373333225426	ENOG411CRY1	148745075, 2570927, 353523834, 50416394, Xelaev18042638m.g	GenBank, Xenbase_9.1	gemin2.S	Unknown (protein for MGC:160905) [Xenopus laevis], survival of motor neuron protein interacting protein 1 [Xenopus laevis], gem-associated protein 2 [Xenopus laevis], Sip1 protein [Xenopus laevis], NA	O14893	GEMIN2	SIP1	gem (nuclear organelle) associated protein 2	0.1663131781449085	0.6902835759681109	FALSE	FALSE	FALSE
ENOG411CQA9	0	0	0	2	0	1.3701428965181228	0	1.4110858716470287	0	1	0.9688373333225426	ENOG411CQA9	Xelaev18027823m.g, Xelaev18027824m.g	Xenbase_9.1	None	NA	Q96RG2	PASK	KIAA0135	PAS domain containing serine threonine kinase	0.1663131781449085	0.6902835759681109	FALSE	FALSE	FALSE
ENOG411CQP5	0	0	0	2	0	1.3701428965181228	0	1.4110858716470287	0	1	0.9688373333225426	ENOG411CQP5	163916250, Xelaev18030651m.g	GenBank, Xenbase_9.1	xylb.L	LOC100137697 protein [Xenopus laevis], NA	O75191	XYLB	NA	xylulokinase homolog (H. influenzae)	0.1663131781449085	0.6902835759681109	FALSE	FALSE	FALSE
ENOG411CQJ0	0	0	0	2	0	1.3701428965181228	0	1.4110858716470287	0	1	0.9688373333225426	ENOG411CQJ0	Xelaev18038302m.g, Xelaev18041519m.g, Xelaev18019095m.g, Xelaev18000809m.g	Xenbase_9.1	nacc2.L, nacc2.S, nacc1.L, nacc1.S	NA	Q96RE7, Q96BF6	NACC1, NACC2	BTBD14B NAC1, BTBD14A NAC2 RBB	BEN and BTB (POZ) domain containing	0.1663131781449085	0.6902835759681109	FALSE	FALSE	FALSE
ENOG411CPED	0	0	0	2	0	1.3701428965181228	0	1.4110858716470287	0	1	0.9688373333225426	ENOG411CPED	123899810, 148235491, Xelaev18025338m.g	GenBank, Xenbase_9.1	npl.S	RecName: Full=N-acetylneuraminate lyase A; Short=NALase A; AltName: Full=N-acetylneuraminate pyruvate-lyase A; AltName: Full=N-acetylneuraminic acid aldolase A; AltName: Full=Sialate lyase A; AltName: Full=Sialate-pyruvate lyase A; AltName: Full=Sialic acid aldolase A; AltName: Full=Sialic acid lyase A, N-acetylneuraminate lyase B [Xenopus laevis], NA	Q9BXD5	NPL	C1orf13	N-acetylneuraminate pyruvate lyase (Dihydrodipicolinate synthase)	0.1663131781449085	0.6902835759681109	FALSE	FALSE	FALSE
ENOG411CYZ3	0	0	0	2	0	1.3701428965181228	0	1.4110858716470287	0	1	0.9688373333225426	ENOG411CYZ3	148235128, Xelaev18017896m.g	GenBank, Xenbase_9.1	loc100127794.L	uncharacterized protein LOC734450 [Xenopus laevis], NA	NA	NA	NA	cation exchanger C521.04c-like	0.1663131781449085	0.6902835759681109	FALSE	FALSE	FALSE
ENOG411CQM7	0	0	0	2	0	1.3701428965181228	0	1.4110858716470287	0	1	0.9688373333225426	ENOG411CQM7	147902353, 15809658, 27924238, 77748491, Xelaev18006562m.g, Xelaev18006554m.g, Xelaev18001206m.g, Xelaev18010864m.g	GenBank, Xenbase_9.1	Xelaev18006562m.g, Xelaev18006554m.g, Xelaev18001206m.g, smn2.S	survival of motor neuron 2, centromeric [Xenopus laevis], survival motor neuron [Xenopus laevis], LOC398438 protein [Xenopus laevis], LOC733398 protein [Xenopus laevis], NA	Q16637	SMN1; SMN2	SMN SMNT; SMNC	Survival motor neuron	0.1663131781449085	0.6902835759681109	FALSE	FALSE	FALSE
ENOG411CPFA	0	0	0	2	0	1.3701428965181228	0	1.4110858716470287	0	1	0.9688373333225426	ENOG411CPFA	1004330, 116283911, 148224387, 148232614, 213626042, Xelaev18026529m.g, Xelaev18024180m.g, Xelaev18028473m.g, Xelaev18022301m.g	GenBank, Xenbase_9.1	rel.L, rela.S, rel.S, rela.L	Xrel2 protein [Xenopus laevis], Rela-a protein [Xenopus laevis], putative transcription factor p65 homolog [Xenopus laevis], rel-related embryonic oncoprotein [Xenopus laevis], Rel3 protein [Xenopus laevis], NA	Q04864, Q04206	REL, RELA	NA, NFKB3	V-rel reticuloendotheliosis viral oncogene homolog	0.1663131781449085	0.6902835759681109	FALSE	FALSE	FALSE
ENOG411CQW1	0	0	0	2	0	1.3701428965181228	0	1.4110858716470287	0	1	0.9688373333225426	ENOG411CQW1	147899452, 148236355, 40286640, 40286642, Xelaev18012860m.g, Xelaev18015436m.g	GenBank, Xenbase_9.1	nup88.L, nup88.S	nucleoporin 88kDa [Xenopus laevis], nucleoporin Nup88A [Xenopus laevis], nucleoporin Nup88B [Xenopus laevis], NA	Q99567	NUP88	NA	Nucleoporin 88kDa	0.1663131781449085	0.6902835759681109	FALSE	FALSE	FALSE
ENOG411D4U7	0	0	0	2	0	1.3701428965181228	0	1.4110858716470287	0	1	0.9688373333225426	ENOG411D4U7	126632065, 51873804, Xelaev18010209m.g, Xelaev18007009m.g	GenBank, Xenbase_9.1	nedd8.S, nedd8.L	Unknown (protein for MGC:161083) [Xenopus laevis], LOC446966 protein [Xenopus laevis], NA	Q15843	NEDD8	NA	neural precursor cell expressed, developmentally down-regulated 8	0.1663131781449085	0.6902835759681109	FALSE	FALSE	FALSE
ENOG411CWAM	0	0	0	2	0	1.3701428965181228	0	1.4110858716470287	0	1	0.9688373333225426	ENOG411CWAM	147899149, 148227095, 27370915, 33417067, 55250531, Xelaev18031916m.g, Xelaev18033655m.g	GenBank, Xenbase_9.1	osbpl1a.L, osbpl1a.S	uncharacterized protein LOC398688 [Xenopus laevis], oxysterol binding protein-like 2 [Xenopus laevis], LOC398688 protein [Xenopus laevis], LOC495678 protein [Xenopus laevis], NA	Q9BXW6, Q9H1P3	OSBPL1A, OSBPL2	ORP1 OSBP8 OSBPL1 OSBPL1B, KIAA0772 ORP2	oxysterol binding protein-like	0.1663131781449085	0.6902835759681109	FALSE	FALSE	FALSE
ENOG411CT62	0	0	0	2	0	1.3701428965181228	0	1.4110858716470287	0	1	0.9688373333225426	ENOG411CT62	147904457, Xelaev18033633m.g	GenBank, Xenbase_9.1	enosf1.S	mitochondrial enolase superfamily member 1 [Xenopus laevis], NA	Q7L5Y1	ENOSF1	RTS TYMSAS	Enolase superfamily member 1	0.1663131781449085	0.6902835759681109	FALSE	FALSE	FALSE
ENOG411CZU8	0	0	0	2	0	1.3701428965181228	0	1.4110858716470287	0	1	0.9688373333225426	ENOG411CZU8	148228923, Xelaev18022157m.g, Xelaev18024256m.g	GenBank, Xenbase_9.1	vps51.L, vps51.S	protein fat-free homolog [Xenopus laevis], NA	Q9UID3	VPS51	ANG2 C11orf2 C11orf3 FFR	vacuolar protein sorting 51 homolog (S. cerevisiae)	0.1663131781449085	0.6902835759681109	FALSE	FALSE	FALSE
ENOG411CQN9	0	0	0	2	0	1.3701428965181228	0	1.4110858716470287	0	1	0.9688373333225426	ENOG411CQN9	147907164, Xelaev18039628m.g	GenBank, Xenbase_9.1	pole2.L	DNA-directed DNA polymerase epsilon 2 [Xenopus laevis], NA	P56282	POLE2	DPE2	polymerase (DNA directed), epsilon 2, accessory subunit	0.1663131781449085	0.6902835759681109	FALSE	FALSE	FALSE
ENOG411CX8P	0	0	0	2	0	1.3701428965181228	0	1.4110858716470287	0	1	0.9688373333225426	ENOG411CX8P	148223505, Xelaev18045558m.g, Xelaev18047790m.g	GenBank, Xenbase_9.1	flii.L, flii.S	flightless 1 homolog [Xenopus laevis], NA	Q13045	FLII	FLIL	flightless I homolog (Drosophila)	0.1663131781449085	0.6902835759681109	FALSE	FALSE	FALSE
ENOG411CRS3	0	0	0	2	0	1.3701428965181228	0	1.4110858716470287	0	1	0.9688373333225426	ENOG411CRS3	125955, 125958, 125963, 147901703, 147904084, 3414963, 3414965, 50417542, 54037965, Xelaev18010734m.g, Xelaev18040808m.g, Xelaev18009631m.g	GenBank, Xenbase_9.1	lmnb1.S, lmna.L, lmnb2.S	RecName: Full=Lamin-L(I); Flags: Precursor, RecName: Full=Lamin-L(II); Flags: Precursor, RecName: Full=Lamin-A; Flags: Precursor, lamin B2 [Xenopus laevis], lamin B1 [Xenopus laevis], LOC397912 protein [Xenopus laevis], LOC397911 protein [Xenopus laevis], NA	P02545, P20700, Q03252	LMNA, LMNB1, LMNB2	LMN1, LMN2 LMNB, LMN2	Lamin A C	0.1663131781449085	0.6902835759681109	FALSE	FALSE	FALSE
ENOG411CU69	0	0	0	2	0	1.3701428965181228	0	1.4110858716470287	0	1	0.9688373333225426	ENOG411CU69	118457, 138531, 138532, 147904224, 148221985, 148232220, 28277305, 32484324, 38303787, Xelaev18044480m.g	GenBank, Xenbase_9.1	des.1.L	RecName: Full=Desmin, RecName: Full=Vimentin-1/2, RecName: Full=Vimentin-4, desmin, gene 1 [Xenopus laevis], vimentin-4 [Xenopus laevis], vimentin-1/2 [Xenopus laevis], Vim4 protein [Xenopus laevis], Vim1 protein [Xenopus laevis], NA	P08670, P17661	VIM, DES	NA	vimentin	0.1663131781449085	0.6902835759681109	FALSE	FALSE	FALSE
ENOG411CSAM	0	0	0	2	0	1.3701428965181228	0	1.4110858716470287	0	1	0.9688373333225426	ENOG411CSAM	Xelaev18030516m.g, Xelaev18032727m.g	Xenbase_9.1	ptpn23.L, ptpn23.S	NA	Q9H3S7	PTPN23	KIAA1471	Protein tyrosine phosphatase non-receptor type 23	0.1663131781449085	0.6902835759681109	FALSE	FALSE	FALSE
ENOG411CUC5	0	0	0	2	0	1.3701428965181228	0	1.4110858716470287	0	1	0.9688373333225426	ENOG411CUC5	148226086, 148229367	GenBank	NA	protein kinase, AMP-activated, alpha 2 catalytic subunit [Xenopus laevis], protein kinase, AMP-activated, alpha 1 catalytic subunit [Xenopus laevis]	Q13131	PRKAA1	AMPK1	protein kinase, AMP-activated, alpha 1 catalytic subunit	0.1663131781449085	0.6902835759681109	FALSE	FALSE	FALSE
ENOG411CVH3	0	0	0	2	0	1.3701428965181228	0	1.4110858716470287	0	1	0.9688373333225426	ENOG411CVH3	147906003, Xelaev18044456m.g, Xelaev18047007m.g	GenBank, Xenbase_9.1	rab3gap1.L, rab3gap1.S	rab3 GTPase-activating protein catalytic subunit [Xenopus laevis], NA	Q15042	RAB3GAP1	KIAA0066 RAB3GAP	RAB3 GTPase activating protein subunit 1 (Catalytic)	0.1663131781449085	0.6902835759681109	FALSE	FALSE	FALSE
ENOG411CVAD	0	0	0	2	0	1.3701428965181228	0	1.4110858716470287	0	1	0.9688373333225426	ENOG411CVAD	118723354, 147903871, Xelaev18029714m.g	GenBank, Xenbase_9.1	slc2a2.S	solute carrier family 2, facilitated glucose transporter member 2 [Xenopus laevis], solute carrier family 2 (facilitated glucose transporter), member 2 [Xenopus laevis], NA	P11168	SLC2A2	GLUT2	solute carrier family 2, facilitated glucose transporter member 2	0.1663131781449085	0.6902835759681109	FALSE	FALSE	FALSE
ENOG411CTHY	0	0	0	2	0	1.3701428965181228	0	1.4110858716470287	0	1	0.9688373333225426	ENOG411CTHY	Xelaev18011244m.g	Xenbase_9.1	maats1.L	NA	Q7Z4T9	MAATS1	AAT1 C3orf15 CFAP91	MYCBP AMY-1-associated, testis expressed 1	0.1663131781449085	0.6902835759681109	FALSE	FALSE	FALSE
ENOG411CRVN	0	0	0	2	0	1.3701428965181228	0	1.4110858716470287	0	1	0.9688373333225426	ENOG411CRVN	147903465, 147906755, Xelaev18011223m.g	GenBank, Xenbase_9.1	agpat3.L	1-acylglycerol-3-phosphate O-acyltransferase 3 [Xenopus laevis], NA	Q9NRZ7	AGPAT3	LPAAT3	1-acylglycerol-3-phosphate O-acyltransferase 3	0.1663131781449085	0.6902835759681109	FALSE	FALSE	FALSE
ENOG411CW18	0	0	0	2	0	1.3701428965181228	0	1.4110858716470287	0	1	0.9688373333225426	ENOG411CW18	Xelaev18026048m.g, Xelaev18026086m.g	Xenbase_9.1	Xelaev18026048m.g, mtif2.L	NA	P46199	MTIF2	NA	mitochondrial translational initiation factor 2	0.1663131781449085	0.6902835759681109	FALSE	FALSE	FALSE
ENOG411D008	0	0	0	2	0	1.3701428965181228	0	1.4110858716470287	0	1	0.9688373333225426	ENOG411D008	116487886, 159155357, 257096602, 257096603, 50925016, Xelaev18042889m.g	GenBank, Xenbase_9.1	glmp.S	LOC779099 protein [Xenopus laevis], RecName: Full=Lysosomal protein NCU-G1-A; Flags: Precursor, RecName: Full=Lysosomal protein NCU-G1-B; Flags: Precursor, LOC446270 protein [Xenopus laevis], NA	Q8WWB7	GLMP	C1orf85	chromosome 1 open reading frame 85	0.1663131781449085	0.6902835759681109	FALSE	FALSE	FALSE
ENOG411CRJ7	0	0	0	2	0	1.3701428965181228	0	1.4110858716470287	0	1	0.9688373333225426	ENOG411CRJ7	147905226, 148233732, Xelaev18036414m.g, Xelaev18037982m.g	GenBank, Xenbase_9.1	emc1.L, emc1.S	uncharacterized protein KIAA0090 homolog precursor [Xenopus laevis], putative protein of eukaryotic origin (2B780) precursor [Xenopus laevis], NA	Q8N766	EMC1	KIAA0090	ER membrane protein complex subunit 1	0.1663131781449085	0.6902835759681109	FALSE	FALSE	FALSE
ENOG411CWQ5	0	0	0	2	0	1.3701428965181228	0	1.4110858716470287	0	1	0.9688373333225426	ENOG411CWQ5	114107828, 147907086, 148229973, Xelaev18037740m.g, Xelaev18032220m.g, Xelaev18046001m.g, Xelaev18043241m.g	GenBank, Xenbase_9.1	Xelaev18037740m.g, stk3.L, stk4.S, stk4.L	Stk4 protein [Xenopus laevis], serine/threonine-protein kinase 3 [Xenopus laevis], serine/threonine-protein kinase 4 [Xenopus laevis], NA	Q13043, Q13188	STK4, STK3	KRS2 MST1, KRS1 MST2	serine threonine kinase	0.1663131781449085	0.6902835759681109	FALSE	FALSE	FALSE
ENOG411CPN7	0	0	0	2	0	1.3701428965181228	0	1.4110858716470287	0	1	0.9688373333225426	ENOG411CPN7	147905682, 28278733, 52139086, Xelaev18031895m.g	GenBank, Xenbase_9.1	thoc1.L	THO complex 1 protein [Xenopus laevis], LOC398505 protein [Xenopus laevis], NA	Q96FV9	THOC1	HPR1	THO complex 1	0.1663131781449085	0.6902835759681109	FALSE	FALSE	FALSE
ENOG411CQZU	0	0	0	2	0	1.3701428965181228	0	1.4110858716470287	0	1	0.9688373333225426	ENOG411CQZU	147904643, 148232994	GenBank	NA	SH3 domain-binding protein 4-A [Xenopus laevis], SH3 domain-binding protein 4-B [Xenopus laevis]	Q9P0V3	SH3BP4	BOG25 EHB10 TTP	SH3-domain binding protein 4	0.1663131781449085	0.6902835759681109	FALSE	FALSE	FALSE
ENOG411CVA3	0	0	0	2	0	1.3701428965181228	0	1.4110858716470287	0	1	0.9688373333225426	ENOG411CVA3	148236313, Xelaev18020620m.g	GenBank, Xenbase_9.1	myef2.S	myelin expression factor 2 [Xenopus laevis], NA	Q9P2K5	MYEF2	KIAA1341	Myelin expression factor 2	0.1663131781449085	0.6902835759681109	FALSE	FALSE	FALSE
ENOG411CZAZ	0	0	0	2	0	1.3701428965181228	0	1.4110858716470287	0	1	0.9688373333225426	ENOG411CZAZ	148232914, Xelaev18045683m.g	GenBank, Xenbase_9.1	thoc6.L	THO complex 6 homolog [Xenopus laevis], NA	Q86W42	THOC6	WDR58	THO complex 6 homolog (Drosophila)	0.1663131781449085	0.6902835759681109	FALSE	FALSE	FALSE
ENOG411CTEE	0	0	0	2	0	1.3701428965181228	0	1.4110858716470287	0	1	0.9688373333225426	ENOG411CTEE	148227445	GenBank	NA	cell division cycle 16 homolog [Xenopus laevis]	Q13042	CDC16	ANAPC6	Cell division cycle 16 homolog (S. cerevisiae)	0.1663131781449085	0.6902835759681109	FALSE	FALSE	FALSE
ENOG411CTNG	0	0	0	2	0	1.3701428965181228	0	1.4110858716470287	0	1	0.9688373333225426	ENOG411CTNG	147899720, Xelaev18043335m.g, Xelaev18046085m.g	GenBank, Xenbase_9.1	ccdc47.L, ccdc47.S	coiled-coil domain-containing protein 47 precursor [Xenopus laevis], NA	J3QR89, Q96A33	NA, CCDC47	NA	Coiled-coil domain containing 47	0.1663131781449085	0.6902835759681109	FALSE	FALSE	FALSE
ENOG411CY9T	0	0	0	2	0	1.3701428965181228	0	1.4110858716470287	0	1	0.9688373333225426	ENOG411CY9T	Xelaev18018939m.g	Xenbase_9.1	loc100490258.L	NA	Q9H6K5	PRR36	NA	NA	0.1663131781449085	0.6902835759681109	FALSE	FALSE	FALSE
ENOG411CVPG	0	0	0	2	0	1.3701428965181228	0	1.4110858716470287	0	1	0.9688373333225426	ENOG411CVPG	147905021, 148234581, Xelaev18015653m.g, Xelaev18027815m.g	GenBank, Xenbase_9.1	stk24.S, stk25.L	serine/threonine kinase 24 [Xenopus laevis], serine/threonine kinase 25 [Xenopus laevis], NA	Q9Y6E0, O00506	STK24, STK25	MST3 STK3, SOK1 YSK1	serine threonine kinase	0.1663131781449085	0.6902835759681109	FALSE	FALSE	FALSE
ENOG411CTMS	0	0	0	2	0	1.3701428965181228	0	1.4110858716470287	0	1	0.9688373333225426	ENOG411CTMS	Xelaev18016333m.g, Xelaev18005336m.g, Xelaev18009106m.g	Xenbase_9.1	fat3.S, fat1.L, fat1.S	NA	Q14517, Q8TDW7	FAT1, FAT3	CDHF7 FAT, CDHF15 KIAA1989	FAT tumor suppressor homolog	0.1663131781449085	0.6902835759681109	FALSE	FALSE	FALSE
ENOG411CQ2T	0	0	0	2	0	1.3701428965181228	0	1.4110858716470287	0	1	0.9688373333225426	ENOG411CQ2T	117558139, 118763666, 48735147, Xelaev18010281m.g, Xelaev18033747m.g, Xelaev18032051m.g, Xelaev18022507m.g, Xelaev18007308m.g	GenBank, Xenbase_9.1	chd8.S, chd7-like.S, chd7-like.L, chd9.L, chd8.L	LOC443577 protein [Xenopus laevis], NA	Q9P2D1, Q3L8U1, Q9HCK8	CHD7, CHD9, CHD8	KIAA1416, KIAA0308 KISH2 PRIC320, HELSNF1 KIAA1564	Chromodomain helicase DNA binding protein	0.1663131781449085	0.6902835759681109	FALSE	FALSE	FALSE
ENOG411CWMJ	0	0	0	2	0	1.3701428965181228	0	1.4110858716470287	0	1	0.9688373333225426	ENOG411CWMJ	54311416, Xelaev18027624m.g	GenBank, Xenbase_9.1	serpini2.L	LOC495389 protein [Xenopus laevis], NA	O75830	SERPINI2	MEPI PI14	serpin peptidase inhibitor, clade I (pancpin), member 2	0.1663131781449085	0.6902835759681109	FALSE	FALSE	FALSE
ENOG411CW6H	0	0	0	2	0	1.3701428965181228	0	1.4110858716470287	0	1	0.9688373333225426	ENOG411CW6H	115528357, Xelaev18044288m.g, Xelaev18046877m.g, Xelaev18047823m.g, Xelaev18045593m.g	GenBank, Xenbase_9.1	rhot1.L, rhot1.S, rhot2.S, rhot2.L	LOC100158403 protein [Xenopus laevis], NA	Q8IXI2, Q8IXI1	RHOT1, RHOT2	ARHT1, ARHT2 C16orf39	Mitochondrial GTPase involved in mitochondrial trafficking (By similarity)	0.1663131781449085	0.6902835759681109	FALSE	FALSE	FALSE
ENOG411DETJ	0	0	0	2	0	1.3701428965181228	0	1.4110858716470287	0	1	0.9688373333225426	ENOG411DETJ	Xelaev18009262m.g, Xelaev18005531m.g	Xenbase_9.1	otud4.S, otud4.L	NA	NA	NA	NA	OTU domain containing 4	0.1663131781449085	0.6902835759681109	FALSE	FALSE	FALSE
ENOG411CV1M	0	0	0	2	0	1.3701428965181228	0	1.4110858716470287	0	1	0.9688373333225426	ENOG411CV1M	114107973, 83318227, Xelaev18004430m.g	GenBank, Xenbase_9.1	c19orf52.L	MGC154907 protein [Xenopus laevis], LOC733433 protein [Xenopus laevis], NA	Q9BSF4	TIMM29	c19orf52	Chromosome 19 open reading frame 52	0.1663131781449085	0.6902835759681109	FALSE	FALSE	FALSE
ENOG411CVZ6	0	0	0	2	0	1.3701428965181228	0	1.4110858716470287	0	1	0.9688373333225426	ENOG411CVZ6	148222599, Xelaev18017898m.g, Xelaev18020881m.g	GenBank, Xenbase_9.1	zc3hc1.L, zc3hc1.S	NIPA-like protein [Xenopus laevis], NA	Q86WB0	ZC3HC1	NIPA	Zinc finger, C3HC-type containing 1	0.1663131781449085	0.6902835759681109	FALSE	FALSE	FALSE
ENOG411D0AJ	0	0	0	2	0	1.3701428965181228	0	1.4110858716470287	0	1	0.9688373333225426	ENOG411D0AJ	Xelaev18043515m.g, Xelaev18046227m.g	Xenbase_9.1	rbbp8nl.L, rbbp8nl.S	NA	Q8NC74	RBBP8NL	C20orf151	RBBP8 N-terminal like	0.1663131781449085	0.6902835759681109	FALSE	FALSE	FALSE
ENOG411CPS2	6	12	9	17	0.7425457522148697	0.5975257230329337	0.49088306678465793	0.2956086542270927	9	13	0.9475736274223824	ENOG411CPS2	Xelaev18029561m.g	Xenbase_9.1	eif2b5.S	NA	Q13144	EIF2B5	EIF2BE	eukaryotic translation initiation factor 2B, subunit 5 epsilon, 82kDa	0.17167327864243848	0.6902835759681109	FALSE	FALSE	FALSE
ENOG411D04M	0	3	0	8	0	1.3380345033343874	0	0.9960483723681846	1.5	4	0.9461332707693194	ENOG411D04M	147902441, 148233376, Xelaev18010694m.g	GenBank, Xenbase_9.1	rfc5.S	MGC80325 protein [Xenopus laevis], replication factor C (activator 1) 5, 36.5kDa [Xenopus laevis], NA	P40937	RFC5	NA	replication factor C (activator 1) 5, 36.5kDa	0.17204030797439954	0.6902835759681109	FALSE	FALSE	FALSE
ENOG411CTJ0	0	3	0	8	0	1.3380345033343874	0	0.9960483723681846	1.5	4	0.9461332707693194	ENOG411CTJ0	147906805, Xelaev18039504m.g, Xelaev18041346m.g	GenBank, Xenbase_9.1	sel1l.L, sel1l.S	sel-1 suppressor of lin-12-like precursor [Xenopus laevis], NA	Q9UBV2, Q5TEA6	SEL1L, SEL1L2	TSA305, C20orf50	Sel-1 suppressor of lin-12-like	0.17204030797439954	0.6902835759681109	FALSE	FALSE	FALSE
ENOG411CW29	8	15	12	20	0.8574955482680781	0.47514902388668484	0.5068246106536793	0.21844079370463268	11.5	16	0.942322013882078	ENOG411CW29	Xelaev18001856m.g	Xenbase_9.1	atg7.L	NA	O95352	ATG7	APG7L	autophagy related 7	0.1730139004237815	0.6902835759681109	FALSE	FALSE	FALSE
ENOG411CX09	2	3	2	8	-0.018530600660750022	1.3380345033343874	-0.023690106045100492	0.9960483723681846	2.5	5	0.9330301573826432	ENOG411CX09	148222254, 148236003, Xelaev18046985m.g	GenBank, Xenbase_9.1	aamp.S	MGC80037 protein [Xenopus laevis], angio-associated, migratory cell protein [Xenopus laevis], NA	Q13685	AAMP	NA	Angio-associated, migratory cell protein	0.17540219891227846	0.6902835759681109	FALSE	FALSE	FALSE
ENOG411CTYE	3	3	3	8	-0.022696079002275556	1.3380345033343874	-0.023690106045100492	0.9960483723681846	3	5.5	0.9300847194004647	ENOG411CTYE	57032570, Xelaev18029485m.g	GenBank, Xenbase_9.1	prim2.S	LOC496363 protein [Xenopus laevis], NA	P49643	PRIM2	PRIM2A	primase, DNA, polypeptide 2	0.17616361090455915	0.6902835759681109	FALSE	FALSE	FALSE
ENOG411CYSD	0	1	2	1	1.407788694550312	-0.09588637572323629	1.561272394676056	-0.17387662907412774	0.5	1.5	0.9276550258969813	ENOG411CYSD	148226883, Xelaev18019141m.g	GenBank, Xenbase_9.1	pelp1.L	proline-, glutamic acid- and leucine-rich protein 1 [Xenopus laevis], NA	Q8IZL8	PELP1	HMX3 MNAR	proline, glutamate and leucine rich protein 1	0.17679327230231204	0.6902835759681109	FALSE	FALSE	FALSE
ENOG411D3S8	0	2	1	3	0.9954389325039961	0.31199846928016123	0.9763098939548995	0.241160870204716	1	2	0.9244978527784983	ENOG411D3S8	148228665, 148230733, 213625115, Xelaev18044940m.g, Xelaev18047361m.g	GenBank, Xenbase_9.1	sumo1.L, sumo1.S	small ubiquitin-related modifier 1-A precursor [Xenopus laevis], small ubiquitin-related modifier 1-B precursor [Xenopus laevis], MGC85025 protein [Xenopus laevis], NA	P63165, G2XKQ0	SUMO1, SUMO1P1	SMT3C SMT3H3 UBL1, SUMO5 UBL2 UBL6	SMT3 suppressor of mif two 3 homolog 1 (S. cerevisiae)	0.17761358445789305	0.6902835759681109	FALSE	FALSE	FALSE
ENOG411CS4C	0	2	1	3	0.9954389325039961	0.31199846928016123	0.9763098939548995	0.241160870204716	1	2	0.9244978527784983	ENOG411CS4C	147904439, 148223265, Xelaev18016672m.g	GenBank, Xenbase_9.1	nup50.L	uncharacterized protein LOC503671 [Xenopus laevis], nucleoporin 50kDa [Xenopus laevis], NA	Q9UKX7	NUP50	NPAP60L	nucleoporin 50kDa	0.17761358445789305	0.6902835759681109	FALSE	FALSE	FALSE
ENOG411CUAY	0	2	1	3	0.9954389325039961	0.31199846928016123	0.9763098939548995	0.241160870204716	1	2	0.9244978527784983	ENOG411CUAY	147906715, 148224882, 67678144, Xelaev18023303m.g, Xelaev18025369m.g, Xelaev18006266m.g, Xelaev18006511m.g, Xelaev18001245m.g	GenBank, Xenbase_9.1	ptbp2.L, ptbp2.S, ptbp1.L, ptbp3.L, ptbp3.S	hnRNP I-related RNA transport protein VgRBP60 [Xenopus laevis], polypyrimidine tract binding protein 1 [Xenopus laevis], VgRBP60 protein [Xenopus laevis], NA	O95758, P26599, Q9UKA9	PTBP3, PTBP1, PTBP2	ROD1, PTB, NPTB PTB PTBLP	polypyrimidine tract binding protein	0.17761358445789305	0.6902835759681109	FALSE	FALSE	FALSE
ENOG411CP8D	4	10	6	15	0.6062312335962097	0.6977836895264887	0.46173672112514147	0.3666917522885751	7	10.5	0.9220777949085144	ENOG411CP8D	148235539, Xelaev18010891m.g	GenBank, Xenbase_9.1	col4a3bp.S	collagen type IV alpha-3-binding protein [Xenopus laevis], NA	Q9Y5P4	COL4A3BP	CERT STARD11	collagen, type IV, alpha 3 (Goodpasture antigen) binding protein	0.17824399922297973	0.6902835759681109	FALSE	FALSE	FALSE
ENOG411CP9V	8	12	13	15	1.0541462925571683	0.2462539710449596	0.6137398145701912	0.1256836527847802	10	14	0.9195218446498385	ENOG411CP9V	115292033, 58177865, Xelaev18025591m.g, Xelaev18023581m.g	GenBank, Xenbase_9.1	uchl5.S, uchl5.L	LOC733154 protein [Xenopus laevis], NA	Q9Y5K5	UCHL5	UCH37	ubiquitin carboxyl-terminal hydrolase L5	0.1789113425362389	0.6902835759681109	FALSE	FALSE	FALSE
ENOG411CX94	7	5	8	10	0.22358758793661265	1.075834029817418	0.1462348953972121	0.7005924888420134	6	9	0.918829837534269	ENOG411CX94	Xelaev18026725m.g	Xenbase_9.1	ttc27.L	NA	Q6P3X3	TTC27	NA	Tetratricopeptide repeat domain 27	0.17909229160225826	0.6902835759681109	FALSE	FALSE	FALSE
ENOG411CRU2	4	7	6	11	0.6062312335962097	0.689799609831477	0.46173672112514147	0.41108587164702864	5.5	8.5	0.9164321980146379	ENOG411CRU2	148235168, 54673738, Xelaev18024787m.g, Xelaev18022522m.g, Xelaev18033855m.g	GenBank, Xenbase_9.1	cpne2.S, cpne2-like.L, cpne3.S	copine III [Xenopus laevis], LOC495505 protein [Xenopus laevis], NA	O75131, Q96FN4	CPNE3, CPNE2	CPN3 KIAA0636, NA	copine III	0.17972012703693363	0.6902835759681109	FALSE	FALSE	FALSE
ENOG411CVGN	9	22	14	27	1.0034428893567378	0.2659632019131113	0.5612723946760556	0.10991633692646369	15.5	20.5	0.8976056552164197	ENOG411CVGN	148226353	GenBank	NA	uridine 5'-monophosphate synthase [Xenopus laevis]	P11172	UMPS	NA	Uridine monophosphate synthetase	0.1846979115069585	0.6902835759681109	FALSE	FALSE	FALSE
ENOG411CUWV	1	2	1	6	-0.013102639503260374	1.2743298740759423	-0.023690106045100492	1.04851579226232	1.5	3.5	0.8918223301834999	ENOG411CUWV	147901518, Xelaev18041315m.g, Xelaev18039548m.g	GenBank, Xenbase_9.1	cpsf2.S, cpsf2.L	cleavage and polyadenylation specificity factor subunit 2 [Xenopus laevis], NA	Q9P2I0	CPSF2	CPSF100 KIAA1367	Cleavage and polyadenylation specific factor 2, 100kDa	0.18624408537486692	0.6902835759681109	FALSE	FALSE	FALSE
ENOG411CYN2	11	12	12	20	0.16512850206423402	1.0827954458886182	0.09178711137483554	0.5180010755635407	11.5	16	0.88241548600255	ENOG411CYN2	116063392, 123910711, 28278772, 61403346, 8886479, Xelaev18032285m.g	GenBank, Xenbase_9.1	eif3e.L	Eif3e-a protein [Xenopus laevis], RecName: Full=Eukaryotic translation initiation factor 3 subunit E-B; Short=eIF3e-B; AltName: Full=Eukaryotic translation initiation factor 3 subunit 6-B, Eif3e-b protein [Xenopus laevis], Int-6 protein [Xenopus laevis], NA	P60228	EIF3E	EIF3S6 INT6	Component of the eukaryotic translation initiation factor 3 (eIF-3) complex, which is required for several steps in the initiation of protein synthesis. The eIF-3 complex associates with the 40S ribosome and facilitates the recruitment of eIF-1, eIF-1A, eIF-2 GTP methionyl-tRNAi and eIF-5 to form the 43S preinitiation complex (43S PIC). The eIF-3 complex stimulates mRNA recruitment to the 43S PIC…	0.18877608215224614	0.6902835759681109	FALSE	FALSE	FALSE
ENOG411D1W5	1	2	2	4	0.5640392668774026	0.6803584288480714	0.5612723946760559	0.5630889650920785	1.5	3	0.8799220491403965	ENOG411D1W5	Xelaev18005299m.g, Xelaev18009078m.g	Xenbase_9.1	exoc1.L, exoc1.S	NA	Q9NV70	EXOC1	SEC3 SEC3L1	Exocyst complex component 1	0.18945076958032328	0.6902835759681109	FALSE	FALSE	FALSE
ENOG411CXYY	1	2	2	4	0.5640392668774026	0.6803584288480714	0.5612723946760559	0.5630889650920785	1.5	3	0.8799220491403965	ENOG411CXYY	Xelaev18026638m.g	Xenbase_9.1	mrps5.L	NA	P82675	MRPS5	NA	mitochondrial ribosomal protein S5	0.18945076958032328	0.6902835759681109	FALSE	FALSE	FALSE
ENOG411CQ07	0	1	0	4	0	1.2392234788223713	0	1.1480514658132348	0.5	2	0.8762633252808827	ENOG411CQ07	284521569, 49257842, Xelaev18045254m.g, Xelaev18047566m.g	GenBank, Xenbase_9.1	pdpk1.L, pdpk1.S	3-phosphoinositide dependent protein kinase-1 [Xenopus laevis], MGC82080 protein [Xenopus laevis], NA	Q6A1A2, O15530	PDPK2P, PDPK1	PDPK2, PDK1	3-phosphoinositide dependent protein kinase-1	0.19044344887794254	0.6902835759681109	FALSE	FALSE	FALSE
ENOG411CU2V	0	1	0	4	0	1.2392234788223713	0	1.1480514658132348	0.5	2	0.8762633252808827	ENOG411CU2V	147900472, 148226721, 148231281, Xelaev18046619m.g, Xelaev18043948m.g	GenBank, Xenbase_9.1	rbm39.S, rbm39.L	MGC81970 protein [Xenopus laevis], RNA binding motif protein 39 [Xenopus laevis], RNA binding motif protein 23 [Xenopus laevis], NA	Q14498	RBM39	HCC1 RNPC2	RNA binding motif protein	0.19044344887794254	0.6902835759681109	FALSE	FALSE	FALSE
ENOG411CPQY	0	1	0	4	0	1.2392234788223713	0	1.1480514658132348	0.5	2	0.8762633252808827	ENOG411CPQY	114107883, 147903227	GenBank	NA	Rcn1 protein [Xenopus laevis], uncharacterized protein LOC496147 precursor [Xenopus laevis]	Q15293, E9PP27	RCN1, NA	RCN, NA	Reticulocalbin 1, EF-hand calcium binding domain	0.19044344887794254	0.6902835759681109	FALSE	FALSE	FALSE
ENOG411CYN4	0	1	0	4	0	1.2392234788223713	0	1.1480514658132348	0.5	2	0.8762633252808827	ENOG411CYN4	147901986, Xelaev18042987m.g, Xelaev18040892m.g	GenBank, Xenbase_9.1	pi4kb.S, pi4kb.L	phosphatidylinositol 4-kinase beta [Xenopus laevis], NA	Q9UBF8	PI4KB	PIK4CB	Phosphatidylinositol 4-kinase, catalytic, beta	0.19044344887794254	0.6902835759681109	FALSE	FALSE	FALSE
ENOG411D0RW	0	1	0	4	0	1.2392234788223713	0	1.1480514658132348	0.5	2	0.8762633252808827	ENOG411D0RW	10129814, 114401, 147903986, 147904499, 148234585, 28279355, 9837363, Xelaev18019679m.g, Xelaev18029958m.g, Xelaev18001092m.g	GenBank, Xenbase_9.1	Xelaev18019679m.g, atp1b3.S, Xelaev18001092m.g	Na,K-ATPase beta-2 subunit [Xenopus laevis], RecName: Full=Sodium/potassium-transporting ATPase subunit beta-3; AltName: Full=Sodium/potassium-dependent ATPase subunit beta-3; Short=ATPB-3, ATPase, Na+/K+ transporting, beta 2 polypeptide [Xenopus laevis], sodium/potassium-transporting ATPase subunit beta-3 [Xenopus laevis], ATPase, Na+/K+ transporting, beta 3 polypeptide [Xenopus laevis], Atp1b2 …	P14415, P54709	ATP1B2, ATP1B3	NA	ATPase, Na K transporting, beta	0.19044344887794254	0.6902835759681109	FALSE	FALSE	FALSE
ENOG411CQUI	0	1	0	4	0	1.2392234788223713	0	1.1480514658132348	0.5	2	0.8762633252808827	ENOG411CQUI	147902738, Xelaev18020855m.g	GenBank, Xenbase_9.1	calu.S	calumenin precursor [Xenopus laevis], NA	O43852	CALU	NA	Calumenin	0.19044344887794254	0.6902835759681109	FALSE	FALSE	FALSE
ENOG411CS84	2	10	5	12	1.11483555352971	0.12402912586202783	0.9763098939548995	0.06713147042966727	6	8.5	0.8760096157703959	ENOG411CS84	148237378, Xelaev18031161m.g	GenBank, Xenbase_9.1	lars2.L	leucyl-tRNA synthetase 2, mitochondrial [Xenopus laevis], NA	Q15031	LARS2	KIAA0028	Leucyl-tRNA synthetase 2, mitochondrial	0.19051240317072943	0.6902835759681109	FALSE	FALSE	FALSE
ENOG411DF7S	1	1	1	4	-0.013102639503260374	1.2392234788223713	-0.023690106045100492	1.1480514658132348	1	2.5	0.8669983600366845	ENOG411DF7S	169641981, Xelaev18047043m.g, Xelaev18044509m.g	GenBank, Xenbase_9.1	grsf1.S, grsf1.L	LOC100158276 protein [Xenopus laevis], NA	NA	NA	NA	G-rich RNA sequence binding factor 1	0.19297145412778105	0.6902835759681109	FALSE	FALSE	FALSE
ENOG411CXH3	1	1	1	4	-0.013102639503260374	1.2392234788223713	-0.023690106045100492	1.1480514658132348	1	2.5	0.8669983600366845	ENOG411CXH3	147898578, Xelaev18030321m.g	GenBank, Xenbase_9.1	nrbp1.S	nuclear receptor binding protein 1 [Xenopus laevis], NA	Q9UHY1	NRBP1	BCON3 NRBP	nuclear receptor binding protein 1	0.19297145412778105	0.6902835759681109	FALSE	FALSE	FALSE
ENOG411CWMK	2	14	6	15	1.394837396380582	-0.17267009777524572	1.1987023152913476	-0.08076722468264629	8	10.5	0.8642027845882774	ENOG411CWMK	147902730, 54311504, Xelaev18026588m.g, Xelaev18028877m.g, Xelaev18028878m.g	GenBank, Xenbase_9.1	Xelaev18026588m.g, Xelaev18028877m.g, Xelaev18028878m.g	eukaryotic initiation factor 4A-III-B [Xenopus laevis], Unknown (protein for MGC:85498) [Xenopus laevis], NA	P38919	EIF4A3	DDX48 KIAA0111	eukaryotic translation initiation factor 4A3	0.1937382514040505	0.6902835759681109	FALSE	FALSE	FALSE
ENOG411CRJ5	7	2	6	7	-0.3121271148375489	1.5244287218181611	-0.2163351839874963	1.241160870204716	4.5	6.5	0.8572266871393397	ENOG411CRJ5	123904542, 123908012, 147742927, 284520926, 55250671, 56199607, 56199609, Xelaev18013718m.g, Xelaev18009003m.g, Xelaev18016172m.g, Xelaev18005223m.g	GenBank, Xenbase_9.1	pds5b.L, pds5a.S, pds5b.S, pds5a.L	RecName: Full=Sister chromatid cohesion protein PDS5 homolog A-B, RecName: Full=Sister chromatid cohesion protein PDS5 homolog B-A; AltName: Full=Androgen-induced proliferation inhibitor A, RecName: Full=Sister chromatid cohesion protein PDS5 homolog B-B; AltName: Full=Androgen-induced proliferation inhibitor B, sister chromatid cohesion protein PDS5 homolog B-B [Xenopus laevis], Pds5b-b protein …	Q9NTI5, Q29RF7	PDS5B, PDS5A	APRIN AS3 KIAA0979, KIAA0648 PDS5	PDS5, regulator of cohesion maintenance, homolog	0.19565980816148984	0.6902835759681109	FALSE	FALSE	FALSE
ENOG411CQSS	18	32	26	37	1.1511579721283898	0.060817665401609475	0.48326988267478266	0.029656765011004456	25	31.5	0.8569961919303516	ENOG411CQSS	148231023, Xelaev18011830m.g	GenBank, Xenbase_9.1	eif2s3.L	eukaryotic translation initiation factor 2, subunit 3 gamma, 52kDa [Xenopus laevis], NA	P41091, Q2VIR3	EIF2S3, EIF2S3B	EIF2G, NA	Eukaryotic translation initiation factor 2, subunit	0.1957234945929661	0.6902835759681109	FALSE	FALSE	FALSE
ENOG411CT9J	0	3	1	4	0.9954389325039961	0.21243601116614033	0.9763098939548995	0.14805146581323483	1.5	2.5	0.8540965634944725	ENOG411CT9J	148223970, Xelaev18013544m.g, Xelaev18044788m.g, Xelaev18047244m.g	GenBank, Xenbase_9.1	nckap1l.L, nckap1.L, nckap1.S	nck-associated protein 1 [Xenopus laevis], NA	Q9Y2A7, P55160	NCKAP1, NCKAP1L	HEM2 KIAA0587 NAP1, HEM1	Nck-associated protein	0.19652574392942704	0.6902835759681109	FALSE	FALSE	FALSE
ENOG411CY59	0	3	1	4	0.9954389325039961	0.21243601116614033	0.9763098939548995	0.14805146581323483	1.5	2.5	0.8540965634944725	ENOG411CY59	Xelaev18025178m.g, Xelaev18023062m.g	Xenbase_9.1	ipo13.S, ipo13.L	NA	O94829	IPO13	KIAA0724 RANBP13	importin 13	0.19652574392942704	0.6902835759681109	FALSE	FALSE	FALSE
ENOG411D3W3	1	3	3	4	0.9862276347740007	0.21243601116614033	0.9763098939548995	0.14805146581323483	2	3.5	0.8475831924060645	ENOG411D3W3	126631444, Xelaev18016425m.g	GenBank, Xenbase_9.1	ndufc2.S	LOC100049100 protein [Xenopus laevis], NA	O95298, E9PQ53	NDUFC2, NDUFC2-KCTD14	NA	Accessory subunit of the mitochondrial membrane respiratory chain NADH dehydrogenase (Complex I), that is believed not to be involved in catalysis. Complex I functions in the transfer of electrons from NADH to the respiratory chain. The immediate electron acceptor for the enzyme is believed to be ubiquinone (By similarity)	0.19833506899601597	0.6902835759681109	FALSE	FALSE	FALSE
ENOG411CX5Y	0	8	1	10	0.9954389325039961	0.20104815914393323	0.9763098939548995	0.1156299881208573	4	5.5	0.8460441361064209	ENOG411CX5Y	108885282, 148235959, 214035, 740281, Xelaev18034469m.g	GenBank, Xenbase_9.1	cdk1.L	RecName: Full=Cyclin-dependent kinase 1-B; Short=CDK1-B; AltName: Full=Cell division control protein 2 homolog 2; AltName: Full=Cell division control protein 2-B; AltName: Full=Cell division protein kinase 1; AltName: Full=p34 protein kinase 2, cyclin-dependent kinase 1-A [Xenopus laevis], p34cdc2x1.2 kinase [Xenopus laevis], cdc2 protein, NA	P06493	CDK1	CDC2 CDC28A CDKN1 P34CDC2	promotes G2-M transition, and regulates G1 progress and G1-S transition via association with multiple interphase cyclins. Required in higher cells for entry into S-phase and mitosis. Phosphorylates PARVA actopaxin, APC, AMPH, APC, BARD1, Bcl- xL BCL2L1, BRCA2, CALD1, CASP8, CDC7, CDC20, CDC25A, CDC25C, CC2D1A, CSNK2 proteins CKII, FZR1 CDH1, CDK7, CEBPB, CHAMP1, DMD dystrophin, EEF1 proteins EF-1…	0.19876406150749787	0.6902835759681109	FALSE	FALSE	FALSE
ENOG411CX0V	1	5	2	8	0.5640392668774026	0.6181379683056818	0.5612723946760559	0.41108587164702837	3	5	0.835925539562323	ENOG411CX0V	123899004, Xelaev18020791m.g	GenBank, Xenbase_9.1	arih1.S	RecName: Full=E3 ubiquitin-protein ligase arih1; AltName: Full=Protein ariadne-1 homolog; Short=ARI-1, NA	Q9Y4X5	ARIH1	ARI MOP6 UBCH7BP	ariadne homolog, ubiquitin-conjugating enzyme E2 binding protein, 1 (Drosophila)	0.20159839679164063	0.6902835759681109	FALSE	FALSE	FALSE
ENOG411CRE9	4	10	5	16	0.30715128444444906	0.8742881645109322	0.23934429978869357	0.45415459353891435	7	10.5	0.8354038459176479	ENOG411CRE9	148234547, Xelaev18035701m.g	GenBank, Xenbase_9.1	ppcs.L	phosphopantothenoylcysteine synthetase [Xenopus laevis], NA	Q9HAB8	PPCS	COAB	phosphopantothenoylcysteine synthetase	0.20174518257267188	0.6902835759681109	FALSE	FALSE	FALSE
ENOG411CWI7	3	14	4	21	0.35526851083729444	0.8257080482195867	0.298237988842262	0.3786643939546511	8.5	12.5	0.8350765333314757	ENOG411CWI7	148225911, 160420302	GenBank	NA	elongation factor Tu GTP binding domain containing 2 [Xenopus laevis], U5 snRNP-specific protein, 116 kD [Xenopus laevis]	Q15029	EFTUD2	KIAA0031 SNRP116	elongation factor Tu GTP binding domain containing 2	0.20183730919989618	0.6902835759681109	FALSE	FALSE	FALSE
ENOG411CQKC	1	4	1	9	-0.013102639503260374	1.1932226486344832	-0.023690106045100492	0.8261233709258724	2.5	5	0.8344708610706181	ENOG411CQKC	147900436, 148234245, 213626342, 50418311, Xelaev18010897m.g, Xelaev18008174m.g, Xelaev18020570m.g, Xelaev18040544m.g	GenBank, Xenbase_9.1	iqgap2.S, iqgap2.L, iqgap1-like.1.S, iqgap3.L	IQ motif containing GTPase activating protein 2 [Xenopus laevis], IQ motif containing GTPase activating protein 1 [Xenopus laevis], XIQGAP1 protein [Xenopus laevis], LOC445857 protein [Xenopus laevis], NA	P46940, Q13576, Q86VI3	IQGAP1, IQGAP2, IQGAP3	KIAA0051, NA	IQ motif containing GTPase activating protein	0.20200785040087418	0.6902835759681109	FALSE	FALSE	FALSE
ENOG411CR0J	10	16	9	28	-0.27096736768238466	1.426178735963131	-0.16119362979503538	0.5966415248031052	13	18.5	0.8168577922151058	ENOG411CR0J	147905870, 148232018, 148236155, 51895816, Xelaev18015103m.g, Xelaev18011617m.g	GenBank, Xenbase_9.1	Xelaev18015103m.g, ctps2.L	CTP synthase 1-B [Xenopus laevis], CTP synthase 2 [Xenopus laevis], CTP synthase 1-A [Xenopus laevis], Ctps-a protein [Xenopus laevis], NA	P17812, Q9NRF8	CTPS1, CTPS2	CTPS, NA	CTP synthase	0.2070048504275167	0.6902835759681109	FALSE	FALSE	FALSE
ENOG411CW0Z	0	7	2	7	1.407788694550312	-0.25372071458869816	1.561272394676056	-0.17387662907412774	3.5	4.5	0.8160492945811177	ENOG411CW0Z	148229066, Xelaev18030721m.g, Xelaev18032859m.g	GenBank, Xenbase_9.1	cul2.L, cul2.S	cullin 2 [Xenopus laevis], NA	Q13617	CUL2	NA	Cullin 2	0.20723597134272692	0.6902835759681109	FALSE	FALSE	FALSE
ENOG411CXPT	1	0	0	5	-1.0139685279334814	2.1664484883645816	-1.0236901060451005	2.4110858716470287	0.5	2.5	0.8149263952024349	ENOG411CXPT	115528812, 148237412, Xelaev18029015m.g, Xelaev18042867m.g, Xelaev18026766m.g	GenBank, Xenbase_9.1	gnpat.S, loc100494829.S, gnpat.L	LOC100158402 protein [Xenopus laevis], MGC84007 protein [Xenopus laevis], NA	O15228	GNPAT	DAPAT DHAPAT	Glycerone-phosphate O-acyltransferase	0.20755722164812893	0.6902835759681109	FALSE	FALSE	FALSE
ENOG411CWQ6	1	0	0	5	-1.0139685279334814	2.1664484883645816	-1.0236901060451005	2.4110858716470287	0.5	2.5	0.8149263952024349	ENOG411CWQ6	116487984, Xelaev18016500m.g, Xelaev18013962m.g	GenBank, Xenbase_9.1	stim1.S, stim1.L	Stim1 protein [Xenopus laevis], NA	Q13586	STIM1	GOK	stromal interaction molecule 1	0.20755722164812893	0.6902835759681109	FALSE	FALSE	FALSE
ENOG411CXA2	4	6	3	14	-0.404298531855121	1.5514452322497747	-0.345618200932463	0.9256590444767867	5	8.5	0.8111552108648322	ENOG411CXA2	111598432, 148229575, 148234496, Xelaev18032698m.g, Xelaev18025724m.g, Xelaev18030469m.g, Xelaev18025723m.g, Xelaev18023731m.g, Xelaev18023732m.g	GenBank, Xenbase_9.1	loc100492858.S, tst.S, loc100492858.L, mpst.S, mpst.L, tst.L	Mpst protein [Xenopus laevis], thiosulfate sulfurtransferase (rhodanese) [Xenopus laevis], thiosulfate sulfurtransferase [Xenopus laevis], NA	P25325, Q16762	MPST, TST	TST2, NA	sulfurtransferase	0.20863827154133055	0.6902835759681109	FALSE	FALSE	FALSE
ENOG411CQFB	6	5	5	12	-0.33371777826601173	1.4806122772567178	-0.24608252738154837	0.9416005883458082	5.5	8.5	0.8109768775418763	ENOG411CQFB	147899475, 148232824, 30353795, 64970, Xelaev18031658m.g	GenBank, Xenbase_9.1	loc100490872.L	polyadenylate-binding protein 1-B [Xenopus laevis], polyadenylate-binding protein 1-A [Xenopus laevis], Pabpc1 protein [Xenopus laevis], polyA binding protein [Xenopus laevis], NA	P11940, Q9H361	PABPC1, PABPC3	PAB1 PABP1 PABPC2, PABP3 PABPL3	poly(A) binding protein, cytoplasmic	0.2086894747296694	0.6902835759681109	FALSE	FALSE	FALSE
ENOG411CPP5	1	4	3	5	0.9862276347740007	0.14215024006098273	0.9763098939548995	0.08915777675966605	2.5	4	0.797883647036682	ENOG411CPP5	11035016, 148228303, 158429118, Xelaev18038781m.g, Xelaev18009263m.g, Xelaev18000122m.g	GenBank, Xenbase_9.1	smarca1.L, smarca5.S, smarca5.L	imitation switch ISWI [Xenopus laevis], SWI/SNF related, matrix associated, actin dependent regulator of chromatin, subfamily a, member 5 [Xenopus laevis], Chain A, Sant Domain Structure Of Xenopus Remodeling Factor Iswi, NA	O60264, P28370	SMARCA5, SMARCA1	SNF2H WCRF135, SNF2L SNF2L1	SWI SNF related, matrix associated, actin dependent regulator of chromatin, subfamily a, member	0.21246900699989105	0.6902835759681109	FALSE	FALSE	FALSE
ENOG411CUJY	6	16	7	24	0.2453032072111943	0.8827614050919701	0.16895497189729536	0.3825167194502577	11	15.5	0.7976621369761412	ENOG411CUJY	Xelaev18009233m.g, Xelaev18013708m.g, Xelaev18005498m.g, Xelaev18016163m.g	Xenbase_9.1	lrba.S, Xetrov90006664m.L, lrba.L, Xetrov90006664m.S	NA	Q8NFP9, P50851	NBEA, LRBA	BCL8B KIAA1544 LYST2, BGL CDC4L LBA	LPS-responsive vesicle trafficking, beach and anchor containing	0.21253329086581135	0.6902835759681109	FALSE	FALSE	FALSE
ENOG411DFDF	5	10	8	13	0.8027335292599369	0.323361302108997	0.5612723946760556	0.1740466743461794	7.5	10.5	0.7962692915200947	ENOG411DFDF	Xelaev18007012m.g	Xenbase_9.1	ipo4.L	NA	NA	NA	NA	Importin 4	0.21293776520123486	0.6902835759681109	FALSE	FALSE	FALSE
ENOG411CZPW	7	16	7	26	-0.03467385035135413	1.160607953147596	-0.023690106045100492	0.4935480318390016	11.5	16.5	0.7961556392564137	ENOG411CZPW	116063396, 148227308, Xelaev18043552m.g, Xelaev18046277m.g	GenBank, Xenbase_9.1	npepl1.L, npepl1.S	Lap-1 protein [Xenopus laevis], aminopeptidase-like 1 [Xenopus laevis], NA	Q8NDH3	NPEPL1	KIAA1974	Aminopeptidase-like 1	0.21297078897732705	0.6902835759681109	FALSE	FALSE	FALSE
ENOG411CW0H	4	22	8	25	1.1282621718377197	-0.011203167987045282	0.8243068005098495	0.003001133009951477	13	16.5	0.7898799966083015	ENOG411CW0H	14132774, 50418217, Xelaev18011917m.g	GenBank, Xenbase_9.1	pafah1b1.L	LIS1 [Xenopus laevis], Unknown (protein for MGC:80035) [Xenopus laevis], NA	P43034	PAFAH1B1	LIS1 MDCR MDS PAFAHA	Positively regulates the activity of the minus-end directed microtubule motor protein dynein. May enhance dynein- mediated microtubule sliding by targeting dynein to the microtubule plus end. Required for several dynein- and microtubule-dependent processes such as the maintenance of Golgi integrity, the peripheral transport of microtubule fragments and the coupling of the nucleus and centrosome. …	0.21479892726854913	0.6902835759681109	FALSE	FALSE	FALSE
ENOG411CRQM	2	2	3	4	0.42863145307757394	0.6803584288480714	0.3913473932337433	0.5630889650920785	2	3.5	0.7841742657768924	ENOG411CRQM	147906378, 148236420, Xelaev18045940m.g	GenBank, Xenbase_9.1	rpl19.S	ribosomal protein L19 [Xenopus laevis], 60S ribosomal protein L19 [Xenopus laevis], NA	P84098	RPL19	NA	ribosomal protein L19	0.21646893152749933	0.6902835759681109	FALSE	FALSE	FALSE
ENOG411DAI7	1	3	2	5	0.5640392668774026	0.54127304156250855	0.5612723946760559	0.41108587164702864	2	3.5	0.7815738286268178	ENOG411DAI7	Xelaev18038369m.g	Xenbase_9.1	surf1.L	NA	NA	NA	NA	surfeit 1	0.21723253627977948	0.6902835759681109	FALSE	FALSE	FALSE
ENOG411CVWX	9	21	11	29	0.40802393563146505	0.6937110560600245	0.23934429978869357	0.27358234789709374	15	20	0.7790442836955568	ENOG411CVWX	123903944	GenBank	NA	RecName: Full=Methylthioribose-1-phosphate isomerase; Short=M1Pi; Short=MTR-1-P isomerase; AltName: Full=S-methyl-5-thioribose-1-phosphate isomerase; AltName: Full=Translation initiation factor eIF-2B subunit alpha/beta/delta-like protein	Q9BV20	MRI1	MRDI	Catalyzes the interconversion of methylthioribose-1- phosphate (MTR-1-P) into methylthioribulose-1-phosphate (MTRu-1-P) (By similarity)	0.21797681452276982	0.6902835759681109	FALSE	FALSE	FALSE
ENOG411CZ5N	1	9	1	16	-0.013102639503260374	1.1125309090704514	-0.023690106045100492	0.5916581172888493	5	8.5	0.7774131848391523	ENOG411CZ5N	Xelaev18006296m.g	Xenbase_9.1	lonp1.L	NA	P36776	LONP1	PRSS15	ATP-dependent serine protease that mediates the selective degradation of misfolded, unassembled or oxidatively damaged polypeptides as well as certain short-lived regulatory proteins in the mitochondrial matrix. May also have a chaperone function in the assembly of inner membrane protein complexes. Participates in the regulation of mitochondrial gene expression and in the maintenance of the integ…	0.21845751802153834	0.6902835759681109	FALSE	FALSE	FALSE
ENOG411CYIF	0	3	0	7	0	1.0969321796323708	0	0.8261233709258723	1.5	3.5	0.7756481827197894	ENOG411CYIF	Xelaev18043829m.g	Xenbase_9.1	elac2.L	NA	Q9BQ52	ELAC2	HPC2	ElaC homolog 2 (E. coli)	0.2189783714287143	0.6902835759681109	FALSE	FALSE	FALSE
ENOG411CSD3	0	5	1	6	0.9954389325039961	0.08769257889861967	0.9763098939548995	0.048515792262320154	2.5	3.5	0.7658896366296238	ENOG411CSD3	148227642, Xelaev18041649m.g, Xelaev18003332m.g	GenBank, Xenbase_9.1	ppp2r4-like.S, ppp2r4.L	protein phosphatase 2A activator, regulatory subunit 4 [Xenopus laevis], NA	Q15257	PTPA	PPP2R4	protein phosphatase 2A activator, regulatory subunit 4	0.22187098638814323	0.6902835759681109	FALSE	FALSE	FALSE
ENOG411CWTI	21	37	26	46	0.669796598340249	0.40668483022586477	0.2717657774810709	0.13278470915992416	29	36	0.761187317960481	ENOG411CWTI	147906793, 148229465, 212286112, 2231175, 2981313, 2981315, 311819830, 50603710, Xelaev18044530m.g	GenBank, Xenbase_9.1	mcm6.2.L	maternal DNA replication licensing factor mcm6 [Xenopus laevis], zygotic DNA replication licensing factor mcm6-B [Xenopus laevis], zygotic DNA replication licensing factor mcm6-A [Xenopus laevis], mis5p [Xenopus laevis], zygotic DNA replication factor MCM6b [Xenopus laevis], zygotic DNA replication factor MCM6a [Xenopus laevis], unnamed protein product [Xenopus laevis], Mcm6a-A protein [Xenopus l…	Q14566	MCM6	NA	minichromosome maintenance complex component 6	0.22327259600198385	0.6902835759681109	FALSE	FALSE	FALSE
ENOG411CV76	8	17	11	22	0.6513122333417994	0.40669725344464197	0.3913473932337433	0.17976032554057308	12.5	16.5	0.7481256826663916	ENOG411CV76	148230575, 28278769	GenBank	NA	NADH dehydrogenase (ubiquinone) 1 alpha subcomplex, 9, 39kDa [Xenopus laevis], MGC64316 protein [Xenopus laevis]	Q16795	NDUFA9	NDUFS2L	NADH dehydrogenase (Ubiquinone) 1 alpha subcomplex	0.22719217605920464	0.6902835759681109	FALSE	FALSE	FALSE
ENOG411CX74	1	1	2	2	0.5640392668774026	0.48107221241408954	0.5612723946760559	0.41108587164702864	1	2	0.7390054141029181	ENOG411CX74	147898449, 148226626, 148229719	GenBank	NA	uncharacterized protein LOC734673 [Xenopus laevis], splicing factor 3b, subunit 4, 49kDa [Xenopus laevis], MGC82420 protein [Xenopus laevis]	Q15427	SF3B4	SAP49	splicing factor 3b, subunit 4, 49kDa	0.22995185488702752	0.6902835759681109	FALSE	FALSE	FALSE
ENOG411CWB4	1	1	2	2	0.5640392668774026	0.48107221241408954	0.5612723946760559	0.41108587164702864	1	2	0.7390054141029181	ENOG411CWB4	148231400, 148238004, 3789855, Xelaev18010540m.g	GenBank, Xenbase_9.1	cdc45.S	CDC45 cell division cycle 45-like [Xenopus laevis], cell division control protein 45 homolog [Xenopus laevis], Cdc45 [Xenopus laevis], NA	O75419	CDC45	CDC45L CDC45L2	cell division cycle 45 homolog (S. cerevisiae)	0.22995185488702752	0.6902835759681109	FALSE	FALSE	FALSE
ENOG411DFJY	12	37	15	47	0.532174917569879	0.5100527984126142	0.2758701758138074	0.16315835820344282	24.5	31	0.736966285511788	ENOG411DFJY	Xelaev18036528m.g, Xelaev18008638m.g, Xelaev18036527m.g, Xelaev18036484m.g, Xelaev18038039m.g, Xelaev18038036m.g, Xelaev18036478m.g, Xelaev18036482m.g, Xelaev18004212m.g, Xelaev18036483m.g	Xenbase_9.1	loc100488805.L, loc100489882.L, loc100488642.L, fcgbp.L, fcgbp.S, Xelaev18038036m.g, loc101735028.L, Xetrov90019630m.L, loc100495886.1.S, Xelaev18036483m.g	NA	NA	NA	NA	Fc fragment of IgG binding protein	0.2305714261112833	0.6902835759681109	FALSE	FALSE	FALSE
ENOG411CVMA	4	4	5	7	0.30715128444444906	0.7128635411165034	0.23934429978869357	0.50419527603851	4	6	0.7212594000649628	ENOG411CVMA	148237896, Xelaev18012424m.g, Xelaev18014721m.g	GenBank, Xenbase_9.1	atg3.L, atg3.S	ubiquitin-like-conjugating enzyme ATG3 [Xenopus laevis], NA	Q9NT62	ATG3	APG3 APG3L	autophagy related 3	0.23537496571168443	0.6902835759681109	FALSE	FALSE	FALSE
ENOG411CTJV	7	10	10	13	0.6930301315330922	0.323361302108997	0.4357415125921968	0.1740466743461794	8.5	11.5	0.718697275068238	ENOG411CTJV	113825, 148226262, 227525, 62740097	GenBank	NA	RecName: Full=Putative ATP-dependent RNA helicase an3, DEAD (Asp-Glu-Ala-Asp) box polypeptide 3, X-linked [Xenopus laevis], ATP dependent RNA helicase, Unknown (protein for MGC:115016) [Xenopus laevis]	O00571, O15523	DDX3X, DDX3Y	DBX DDX3, DBY	DEAD (Asp-Glu-Ala-Asp) box polypeptide 3	0.2361637313195587	0.6902835759681109	FALSE	FALSE	FALSE
ENOG411CURP	5	2	3	8	-0.7367308821136285	1.7526107251628225	-0.6086526067662568	1.4110858716470283	3.5	5.5	0.7183355258908106	ENOG411CURP	Xelaev18044966m.g	Xenbase_9.1	fastkd2.L	NA	Q9NYY8	FASTKD2	KIAA0971	FAST kinase domains 2	0.2362752151594758	0.6902835759681109	FALSE	FALSE	FALSE
ENOG411CWCC	9	6	7	14	-0.5395574189647928	1.5514452322497747	-0.345618200932463	0.9256590444767867	7.5	10.5	0.7155127345738376	ENOG411CWCC	13021687, 148224084, 157415960, Xelaev18004597m.g	GenBank, Xenbase_9.1	hnrnpab.L	CArG-binding factor A [Xenopus laevis], heterogeneous nuclear ribonucleoprotein A/B [Xenopus laevis], Vg1 mRNA binding protein 40 [Xenopus laevis], NA	Q99729	HNRNPAB	ABBP1 HNRPAB	heterogeneous nuclear ribonucleoprotein A B	0.23714613740652507	0.6902835759681109	FALSE	FALSE	FALSE
ENOG411CSWJ	11	17	12	25	0.16512850206423402	0.8405713047897541	0.09178711137483554	0.35663808762465204	14	18.5	0.7111371532644559	ENOG411CSWJ	147901679, Xelaev18037845m.g, Xelaev18036124m.g	GenBank, Xenbase_9.1	gys1.S, gys1.L	uncharacterized protein LOC431912 [Xenopus laevis], NA	P13807, P54840	GYS1, GYS2	GYS, NA	glycogen synthase	0.2384996243978152	0.6902835759681109	FALSE	FALSE	FALSE
ENOG411CY30	1	4	2	6	0.5640392668774026	0.44125363410191915	0.5612723946760559	0.31155019809611423	2.5	4	0.7108494273611747	ENOG411CY30	148228420, 28422157, Xelaev18003366m.g, Xelaev18000373m.g, Xelaev18003528m.g	GenBank, Xenbase_9.1	Xelaev18003366m.g, Xelaev18000373m.g, Xelaev18003528m.g	similar to nucleoporin 214kDa [Xenopus laevis], MGC52541 protein [Xenopus laevis], NA	P35658	NUP214	CAIN CAN KIAA0023	nucleoporin 214kDa	0.23858877383560015	0.6902835759681109	FALSE	FALSE	FALSE
ENOG411CZSG	4	7	5	11	0.30715128444444906	0.689799609831477	0.23934429978869357	0.41108587164702864	5.5	8	0.7049507378525001	ENOG411CZSG	147905306, 148230617, Xelaev18021659m.g, Xelaev18024664m.g	GenBank, Xenbase_9.1	tsg101.L, tsg101.S	uncharacterized protein LOC414576 [Xenopus laevis], tumor susceptibility gene 101 [Xenopus laevis], NA	Q99816	TSG101	NA	Tumor susceptibility gene 101	0.24042044671151336	0.6902835759681109	FALSE	FALSE	FALSE
ENOG411CRNJ	0	2	0	5	0	0.9960992101179701	0	0.8261233709258723	1	2.5	0.7043485062089803	ENOG411CRNJ	Xelaev18010156m.g, Xelaev18006937m.g	Xenbase_9.1	naa35.S, naa35.L	NA	Q5VZE5	NAA35	EGAP MAK10	N(Alpha)-acetyltransferase 35, NatC auxiliary subunit	0.24060788282803483	0.6902835759681109	FALSE	FALSE	FALSE
ENOG411CT1F	0	2	0	5	0	0.9960992101179701	0	0.8261233709258723	1	2.5	0.7043485062089803	ENOG411CT1F	Xelaev18017561m.g, Xelaev18036074m.g, Xelaev18021155m.g, Xelaev18037799m.g	Xenbase_9.1	tbc1d15.L, tbc1d17.L, tbc1d15.S, tbc1d17.S	NA	Q8TC07, Q9HA65	TBC1D15, TBC1D17	NA	TBC1 domain family member	0.24060788282803483	0.6902835759681109	FALSE	FALSE	FALSE
ENOG411CR23	0	2	0	5	0	0.9960992101179701	0	0.8261233709258723	1	2.5	0.7043485062089803	ENOG411CR23	115528690, 147900279, Xelaev18014052m.g	GenBank, Xenbase_9.1	serpinh1.L	LOC100158395 protein [Xenopus laevis], heat shock protein 47 precursor [Xenopus laevis], NA	P50454	SERPINH1	CBP1 CBP2 HSP47 SERPINH2	Serpin peptidase inhibitor, clade H (Heat shock protein 47), member 1, (Collagen binding protein 1)	0.24060788282803483	0.6902835759681109	FALSE	FALSE	FALSE
ENOG411CWZN	0	2	0	5	0	0.9960992101179701	0	0.8261233709258723	1	2.5	0.7043485062089803	ENOG411CWZN	148232415, 27882062	GenBank	NA	notchless homolog 1 [Xenopus laevis], Nle-pending-prov protein [Xenopus laevis]	Q9NVX2	NLE1	NA	notchless homolog 1 (Drosophila)	0.24060788282803483	0.6902835759681109	FALSE	FALSE	FALSE
ENOG411CRBV	0	0	1	0	0.9954389325039961	0	0.9763098939548995	0	0	0.5	0.7038816194306735	ENOG411CRBV	Xelaev18028561m.g, Xelaev18028560m.g	Xenbase_9.1	xpo5.S, loc100486598.S	NA	Q9HAV4	XPO5	KIAA1291 RANBP21	Exportin 5	0.24075324948724786	0.6902835759681109	FALSE	FALSE	FALSE
ENOG411CUMU	0	0	1	0	0.9954389325039961	0	0.9763098939548995	0	0	0.5	0.7038816194306735	ENOG411CUMU	Xelaev18020312m.g, Xelaev18018577m.g	Xenbase_9.1	ciao1.S, ciao1.L	NA	O76071	CIAO1	CIA1 WDR39	cytosolic iron-sulfur protein assembly 1	0.24075324948724786	0.6902835759681109	FALSE	FALSE	FALSE
ENOG411CYZC	0	0	1	0	0.9954389325039961	0	0.9763098939548995	0	0	0.5	0.7038816194306735	ENOG411CYZC	148232768, 214636, 214638, Xelaev18014307m.g, Xelaev18011481m.g	GenBank, Xenbase_9.1	patl2.S, patl2.L	protein PAT1 homolog 2 [Xenopus laevis], egg-specific protein [Xenopus laevis], NA	C9JE40	PATL2	NA	protein associated with topoisomerase II homolog 2 (yeast)	0.24075324948724786	0.6902835759681109	FALSE	FALSE	FALSE
ENOG411CPB5	0	0	1	0	0.9954389325039961	0	0.9763098939548995	0	0	0.5	0.7038816194306735	ENOG411CPB5	148237492, 54035246, Xelaev18041161m.g, Xelaev18039744m.g	GenBank, Xenbase_9.1	inf2.S, inf2.L	inverted formin-2 [Xenopus laevis], LOC495032 protein [Xenopus laevis], NA	Q27J81	INF2	C14orf151 C14orf173	inverted formin, FH2 and WH2 domain containing	0.24075324948724786	0.6902835759681109	FALSE	FALSE	FALSE
ENOG411CP4T	0	0	1	0	0.9954389325039961	0	0.9763098939548995	0	0	0.5	0.7038816194306735	ENOG411CP4T	114107812, Xelaev18006589m.g	GenBank, Xenbase_9.1	haus8.L	MGC154317 protein [Xenopus laevis], NA	Q9BT25	HAUS8	HICE1	HAUS augmin-like complex, subunit 8	0.24075324948724786	0.6902835759681109	FALSE	FALSE	FALSE
ENOG411CQ3C	0	0	1	0	0.9954389325039961	0	0.9763098939548995	0	0	0.5	0.7038816194306735	ENOG411CQ3C	115528249, 147901183, 147902862, 147904880, 148235833, 213623520, Xelaev18029481m.g	GenBank, Xenbase_9.1	ptp4a1.S	Prl-1 protein [Xenopus laevis], protein tyrosine phosphatase type IVA, member 1 [Xenopus laevis], protein tyrosine phosphatase 4a2 [Xenopus laevis], protein tyrosine phosphatase type IVA, member 2 [Xenopus laevis], XPRL-1 [Xenopus laevis], NA	Q93096, Q12974	PTP4A1, PTP4A2	PRL1 PTPCAAX1, PRL2 PTPCAAX2	Protein tyrosine phosphatase type IVA, member	0.24075324948724786	0.6902835759681109	FALSE	FALSE	FALSE
ENOG411CQIC	0	0	1	0	0.9954389325039961	0	0.9763098939548995	0	0	0.5	0.7038816194306735	ENOG411CQIC	148237388, Xelaev18007376m.g, Xelaev18010324m.g	GenBank, Xenbase_9.1	parp2.L, parp2.S	poly (ADP-ribose) polymerase 2 [Xenopus laevis], NA	Q9UGN5	PARP2	ADPRT2 ADPRTL2	poly (ADP-ribose) polymerase 2	0.24075324948724786	0.6902835759681109	FALSE	FALSE	FALSE
Xelaev18005994m.g	0	0	1	0	0.9954389325039961	0	0.9763098939548995	0	0	0.5	0.7038816194306735	Xelaev18005994m.g	NA	Xenbase_9.1	Xetrov90026421m.L	NA	NA	NA	NA	NA	0.24075324948724786	0.6902835759681109	FALSE	FALSE	FALSE
Xelaev18005041m.g	0	0	1	0	0.9954389325039961	0	0.9763098939548995	0	0	0.5	0.7038816194306735	Xelaev18005041m.g	NA	Xenbase_9.1	loc101732961.L	NA	NA	NA	NA	NA	0.24075324948724786	0.6902835759681109	FALSE	FALSE	FALSE
ENOG411CWW2	0	0	1	0	0.9954389325039961	0	0.9763098939548995	0	0	0.5	0.7038816194306735	ENOG411CWW2	68533900, Xelaev18039348m.g	GenBank, Xenbase_9.1	exosc5.L	LOC733302 protein [Xenopus laevis], NA	Q9NQT4	EXOSC5	CML28 RRP46	Exosome component 5	0.24075324948724786	0.6902835759681109	FALSE	FALSE	FALSE
ENOG411D0YK	0	0	1	0	0.9954389325039961	0	0.9763098939548995	0	0	0.5	0.7038816194306735	ENOG411D0YK	Xelaev18007490m.g, Xelaev18010410m.g	Xenbase_9.1	kiaa1671.L, kiaa1671.S	NA	Q9BY89	KIAA1671	NA	kiaa1671	0.24075324948724786	0.6902835759681109	FALSE	FALSE	FALSE
ENOG411CRB6	0	0	1	0	0.9954389325039961	0	0.9763098939548995	0	0	0.5	0.7038816194306735	ENOG411CRB6	148229693, 37791449, Xelaev18020964m.g, Xelaev18012323m.g, Xelaev18017788m.g	GenBank, Xenbase_9.1	ptpn12.S, ptpn22-like.1.L, ptpn12.L	protein tyrosine phosphatase, non-receptor type 12 [Xenopus laevis], protein tyrosine phosphatase PTP-PEST [Xenopus laevis], NA	Q05209, Q9Y2R2	PTPN12, PTPN22	NA, PTPN8	Protein tyrosine phosphatase, non-receptor type	0.24075324948724786	0.6902835759681109	FALSE	FALSE	FALSE
ENOG411CPNS	0	0	1	0	0.9954389325039961	0	0.9763098939548995	0	0	0.5	0.7038816194306735	ENOG411CPNS	147899817, 148231720	GenBank	NA	family with sequence similarity 54, member B protein [Xenopus laevis], hypothetical protein LOC734547 [Xenopus laevis]	Q9H019	MTFR1L	FAM54B	family with sequence similarity 54, member B	0.24075324948724786	0.6902835759681109	FALSE	FALSE	FALSE
ENOG411CTMM	0	0	1	0	0.9954389325039961	0	0.9763098939548995	0	0	0.5	0.7038816194306735	ENOG411CTMM	Xelaev18039494m.g, Xelaev18026104m.g, Xelaev18024159m.g, Xelaev18028782m.g, Xelaev18028783m.g, Xelaev18022351m.g, Xelaev18041355m.g	Xenbase_9.1	nrxn3.L, nrxn1.L, Xelaev18024159m.g, nrxn1.S, Xetrov90021162m.S, Xelaev18022351m.g, nrxn3.S	NA	Q9P2S2, Q9Y4C0, Q9ULB1	NRXN2, NRXN3, NRXN1	KIAA0921, C14orf60 KIAA0743, KIAA0578	Neurexin	0.24075324948724786	0.6902835759681109	FALSE	FALSE	FALSE
ENOG411CWYU	0	0	1	0	0.9954389325039961	0	0.9763098939548995	0	0	0.5	0.7038816194306735	ENOG411CWYU	262176857, Xelaev18027179m.g, Xelaev18029266m.g	GenBank, Xenbase_9.1	rev3l.L, rev3l.S	DNA polymerase zeta [Xenopus laevis], NA	O60673	REV3L	POLZ REV3	REV3-like, polymerase (DNA directed), zeta, catalytic subunit	0.24075324948724786	0.6902835759681109	FALSE	FALSE	FALSE
ENOG411CXWH	0	0	1	0	0.9954389325039961	0	0.9763098939548995	0	0	0.5	0.7038816194306735	ENOG411CXWH	148231237, 30523244, Xelaev18039458m.g	GenBank, Xenbase_9.1	nek9.L	serine/threonine-protein kinase Nek9 [Xenopus laevis], NIMA-family kinase Nercc1 [Xenopus laevis], NA	Q8TD19	NEK9	KIAA1995 NEK8 NERCC	NIMA-related kinase 9	0.24075324948724786	0.6902835759681109	FALSE	FALSE	FALSE
Xelaev18024599m.g	0	0	1	0	0.9954389325039961	0	0.9763098939548995	0	0	0.5	0.7038816194306735	Xelaev18024599m.g	NA	Xenbase_9.1	Xelaev18024599m.g	NA	NA	NA	NA	NA	0.24075324948724786	0.6902835759681109	FALSE	FALSE	FALSE
ENOG411CYFF	0	0	1	0	0.9954389325039961	0	0.9763098939548995	0	0	0.5	0.7038816194306735	ENOG411CYFF	148234688, Xelaev18003098m.g	GenBank, Xenbase_9.1	aar2.L	chromosome 20 open reading frame 4 [Xenopus laevis], NA	Q9Y312	AAR2	C20orf4	AAR2 splicing factor homolog (S. cerevisiae)	0.24075324948724786	0.6902835759681109	FALSE	FALSE	FALSE
ENOG411CVMT	0	0	1	0	0.9954389325039961	0	0.9763098939548995	0	0	0.5	0.7038816194306735	ENOG411CVMT	147899714, 84619425, Xelaev18018790m.g	GenBank, Xenbase_9.1	plat.L	plasminogen activator, tissue [Xenopus laevis], tissue plasminogen activator [Xenopus laevis], NA	P00750	PLAT	NA	Plasminogen activator, tissue	0.24075324948724786	0.6902835759681109	FALSE	FALSE	FALSE
ENOG411CQ8Y	0	0	1	0	0.9954389325039961	0	0.9763098939548995	0	0	0.5	0.7038816194306735	ENOG411CQ8Y	148224231, 148232256, 213623882, 213627661, 76779559, 80476863	GenBank	NA	tsukushi small leucine rich proteoglycan homolog precursor [Xenopus laevis], Unknown (protein for MGC:197077) [Xenopus laevis], Unknown (protein for MGC:197079) [Xenopus laevis], Unknown (protein for MGC:131114) [Xenopus laevis], X-TSK-B1 protein [Xenopus laevis]	Q8WUA8	TSKU	E2IG4 LRRC54 TSK	tsukushi small leucine rich proteoglycan homolog (Xenopus laevis)	0.24075324948724786	0.6902835759681109	FALSE	FALSE	FALSE
ENOG411CVFX	0	0	1	0	0.9954389325039961	0	0.9763098939548995	0	0	0.5	0.7038816194306735	ENOG411CVFX	148226921, 47124909, Xelaev18022847m.g, Xelaev18024985m.g, Xelaev18032473m.g	GenBank, Xenbase_9.1	kifc3.L, kifc3.S, loc100485082.L	kinesin family member C3 [Xenopus laevis], LOC431838 protein [Xenopus laevis], NA	Q9BVG8	KIFC3	NA	Kinesin family member	0.24075324948724786	0.6902835759681109	FALSE	FALSE	FALSE
ENOG411CRU1	0	0	1	0	0.9954389325039961	0	0.9763098939548995	0	0	0.5	0.7038816194306735	ENOG411CRU1	Xelaev18017316m.g	Xenbase_9.1	uimc1.L	NA	Q96RL1	UIMC1	RAP80 RXRIP110	ubiquitin interaction motif containing 1	0.24075324948724786	0.6902835759681109	FALSE	FALSE	FALSE
ENOG411CQBP	0	0	1	0	0.9954389325039961	0	0.9763098939548995	0	0	0.5	0.7038816194306735	ENOG411CQBP	148227107, 148229925, 284520891, Xelaev18020978m.g, Xelaev18041788m.g, Xelaev18025974m.g, Xelaev18017768m.g, Xelaev18024063m.g	GenBank, Xenbase_9.1	srpk3.S, srpk2.S, loc100144966.S, srpk3.L, loc100144966.L	SRSF protein kinase 1 [Xenopus laevis], serine/threonine-protein kinase SRPK1-like [Xenopus laevis], SRSF protein kinase 3 [Xenopus laevis], NA	P78362, Q96SB4, Q9UPE1	SRPK2, SRPK1, SRPK3	NA, MSSK1 STK23	SRSF protein kinase	0.24075324948724786	0.6902835759681109	FALSE	FALSE	FALSE
ENOG411CSDU	0	0	1	0	0.9954389325039961	0	0.9763098939548995	0	0	0.5	0.7038816194306735	ENOG411CSDU	120538010, Xelaev18015452m.g, Xelaev18012873m.g	GenBank, Xenbase_9.1	gemin8.S, gemin8.L	LOC100036923 protein [Xenopus laevis], NA	Q9NWZ8	GEMIN8	FAM51A1	gem (nuclear organelle) associated protein 8	0.24075324948724786	0.6902835759681109	FALSE	FALSE	FALSE
ENOG411CQCA	0	0	1	0	0.9954389325039961	0	0.9763098939548995	0	0	0.5	0.7038816194306735	ENOG411CQCA	222875712, 222875714, 222875716, 222875738, 222875740, 222875742, Xelaev18009196m.g, Xelaev18016272m.g, Xelaev18005449m.g, Xelaev18038771m.g, Xelaev18009198m.g, Xelaev18042030m.g	GenBank, Xenbase_9.1	Xetrov90000859m.S, Xelaev18016272m.g, Xetrov90000859m.L, gria3.L, gria2.S, gria3.S	ionotropic glutamate receptor subunit GluR2 [Xenopus laevis], ionotropic glutamate receptor subunit GluR3 [Xenopus laevis], ionotropic glutamate receptor subunit GluR4 [Xenopus laevis], ionotropic glutamate receptor subunit GluR2(R)flop [Xenopus laevis], ionotropic glutamate receptor subunit GluR3(Q)flop [Xenopus laevis], ionotropic glutamate receptor subunit GluR4(Q)flop [Xenopus laevis], NA	P48058, P42262, P42263	GRIA4, GRIA2, GRIA3	GLUR4, GLUR2, GLUR3 GLURC	Glutamate receptor ionotropic AMPA	0.24075324948724786	0.6902835759681109	FALSE	FALSE	FALSE
ENOG411CSQD	0	0	1	0	0.9954389325039961	0	0.9763098939548995	0	0	0.5	0.7038816194306735	ENOG411CSQD	Xelaev18010246m.g, Xelaev18007070m.g	Xenbase_9.1	oxa1l.S, oxa1l.L	NA	Q15070	OXA1L	NA	Oxidase (Cytochrome c) assembly 1-like	0.24075324948724786	0.6902835759681109	FALSE	FALSE	FALSE
ENOG411CY8J	0	0	1	0	0.9954389325039961	0	0.9763098939548995	0	0	0.5	0.7038816194306735	ENOG411CY8J	Xelaev18024444m.g, Xelaev18021923m.g	Xenbase_9.1	madd.S, madd.L	NA	Q8WXG6	MADD	DENN IG20 KIAA0358	MAP-kinase activating death domain	0.24075324948724786	0.6902835759681109	FALSE	FALSE	FALSE
ENOG411D19W	0	0	1	0	0.9954389325039961	0	0.9763098939548995	0	0	0.5	0.7038816194306735	ENOG411D19W	147904896, 28839725, Xelaev18022804m.g, Xelaev18031113m.g, Xelaev18033172m.g	GenBank, Xenbase_9.1	znrf1.L, znrf2.L, znrf2.S	E3 ubiquitin-protein ligase ZNRF1 [Xenopus laevis], Zrfp1-pending-prov protein [Xenopus laevis], NA	Q8NHG8, Q8ND25	ZNRF2, ZNRF1	RNF202, NIN283	zinc and ring finger	0.24075324948724786	0.6902835759681109	FALSE	FALSE	FALSE
ENOG411DFB2	0	0	1	0	0.9954389325039961	0	0.9763098939548995	0	0	0.5	0.7038816194306735	ENOG411DFB2	124504282, 52354828, 83318389, Xelaev18032551m.g, Xelaev18034138m.g	GenBank, Xenbase_9.1	eppk1.L, Xelaev18034138m.g	LOC494814 protein [Xenopus laevis], NA	NA	NA	NA	Plectin repeat	0.24075324948724786	0.6902835759681109	FALSE	FALSE	FALSE
ENOG411CWZ8	0	0	1	0	0.9954389325039961	0	0.9763098939548995	0	0	0.5	0.7038816194306735	ENOG411CWZ8	11385422, 11692798, 148237930, 49119090, 90110844	GenBank	NA	Atr protein [Xenopus laevis], ataxia telangiectasia and Rad3-related protein [Xenopus laevis], serine/threonine-protein kinase atr [Xenopus laevis], Unknown (protein for IMAGE:5048682) [Xenopus laevis], RecName: Full=Serine/threonine-protein kinase atr; Short=Xatr; AltName: Full=Ataxia telangiectasia and Rad3-related protein	Q13535	ATR	FRP1	Ataxia telangiectasia and Rad3 related	0.24075324948724786	0.6902835759681109	FALSE	FALSE	FALSE
ENOG411D0W6	0	0	1	0	0.9954389325039961	0	0.9763098939548995	0	0	0.5	0.7038816194306735	ENOG411D0W6	148225470, 169641978, 46249516, Xelaev18010480m.g, Xelaev18007581m.g	GenBank, Xenbase_9.1	eif4enif1.S, eif4enif1.L	eukaryotic translation initiation factor 4E nuclear import factor 1 [Xenopus laevis], LOC414649 protein [Xenopus laevis], NA	Q9NRA8	EIF4ENIF1	NA	Eukaryotic translation initiation factor 4E nuclear import factor 1	0.24075324948724786	0.6902835759681109	FALSE	FALSE	FALSE
Xelaev18006853m.g	0	0	1	0	0.9954389325039961	0	0.9763098939548995	0	0	0.5	0.7038816194306735	Xelaev18006853m.g	NA	Xenbase_9.1	loc100486380.L	NA	NA	NA	NA	NA	0.24075324948724786	0.6902835759681109	FALSE	FALSE	FALSE
ENOG411D8VP	0	0	1	0	0.9954389325039961	0	0.9763098939548995	0	0	0.5	0.7038816194306735	ENOG411D8VP	Xelaev18035019m.g, Xelaev18003755m.g, Xelaev18025488m.g, Xelaev18000688m.g, Xelaev18000711m.g, Xelaev18033254m.g, Xelaev18026937m.g, Xelaev18029429m.g, Xelaev18001959m.g, Xelaev18005990m.g, Xelaev18000710m.g, Xelaev18015639m.g	Xenbase_9.1	Xelaev18035019m.g, Xelaev18003755m.g, Xetrov90003191m.S, Xelaev18000688m.g, Xelaev18000711m.g, Xelaev18033254m.g, Xelaev18026937m.g, Xelaev18029429m.g, Xetrov90003191m.1, Xelaev18005990m.g, Xelaev18000710m.g, Xelaev18015639m.g	NA	NA	NA	NA	L1 transposable element	0.24075324948724786	0.6902835759681109	FALSE	FALSE	FALSE
ENOG411CYY6	0	0	1	0	0.9954389325039961	0	0.9763098939548995	0	0	0.5	0.7038816194306735	ENOG411CYY6	Xelaev18034560m.g, Xelaev18036854m.g	Xenbase_9.1	pwwp2b.L, pwwp2b.S	NA	Q6NUJ5	PWWP2B	PWWP2	PWWP domain containing 2B	0.24075324948724786	0.6902835759681109	FALSE	FALSE	FALSE
ENOG411CSJ2	0	0	1	0	0.9954389325039961	0	0.9763098939548995	0	0	0.5	0.7038816194306735	ENOG411CSJ2	116487835, 120577674, 148226096, Xelaev18029827m.g, Xelaev18027736m.g, Xelaev18019556m.g, Xelaev18027735m.g, Xelaev18029826m.g, Xelaev18019555m.g, Xelaev18019553m.g, Xelaev18001039m.g, Xelaev18001041m.g, Xelaev18019554m.g	GenBank, Xenbase_9.1	plscr1.S, plscr1.L, plscr3.L, plscr2.L, plscr2.S, Xelaev18019555m.g, loc100488434.L, loc100488434.S, plscr3.S, loc100489081.L	Plscr2 protein [Xenopus laevis], LOC100037052 protein [Xenopus laevis], phospholipid scramblase 1 [Xenopus laevis], NA	O15162, Q9NRY7, Q9NRY6	PLSCR1, PLSCR2, PLSCR3	NA	Phospholipid scramblase	0.24075324948724786	0.6902835759681109	FALSE	FALSE	FALSE
ENOG411CW97	0	0	1	0	0.9954389325039961	0	0.9763098939548995	0	0	0.5	0.7038816194306735	ENOG411CW97	148228175, Xelaev18017791m.g, Xelaev18012326m.g, Xelaev18020961m.g	GenBank, Xenbase_9.1	phtf2.L, phtf1.L, phtf2.S	putative homeodomain transcription factor 2 [Xenopus laevis], NA	Q8N3S3, Q9UMS5	PHTF2, PHTF1	NA, PHTF	Homeodomain transcription factor	0.24075324948724786	0.6902835759681109	FALSE	FALSE	FALSE
ENOG411CWDS	0	0	1	0	0.9954389325039961	0	0.9763098939548995	0	0	0.5	0.7038816194306735	ENOG411CWDS	Xelaev18047488m.g, Xelaev18045138m.g	Xenbase_9.1	clec16a.S, clec16a.L	NA	Q2KHT3	CLEC16A	KIAA0350	C-type lectin domain family 16, member A	0.24075324948724786	0.6902835759681109	FALSE	FALSE	FALSE
ENOG411DETR	0	0	1	0	0.9954389325039961	0	0.9763098939548995	0	0	0.5	0.7038816194306735	ENOG411DETR	Xelaev18011704m.g	Xenbase_9.1	kiaa0100.L	NA	NA	NA	NA	RNA pol II promoter Fmp27 protein domain	0.24075324948724786	0.6902835759681109	FALSE	FALSE	FALSE
ENOG411CX6P	0	0	1	0	0.9954389325039961	0	0.9763098939548995	0	0	0.5	0.7038816194306735	ENOG411CX6P	147904206, Xelaev18041693m.g, Xelaev18002833m.g	GenBank, Xenbase_9.1	ikbkg.S, ikbkg.L	inhibitor of kappa light polypeptide gene enhancer in B-cells, kinase gamma [Xenopus laevis], NA	Q9Y6K9	IKBKG	FIP3 NEMO	Inhibitor of kappa light polypeptide gene enhancer in B-cells, kinase gamma	0.24075324948724786	0.6902835759681109	FALSE	FALSE	FALSE
ENOG411CVE7	0	0	1	0	0.9954389325039961	0	0.9763098939548995	0	0	0.5	0.7038816194306735	ENOG411CVE7	Xelaev18015547m.g, Xelaev18042208m.g, Xelaev18012999m.g	Xenbase_9.1	kiaa1211l.S, loc100170576.S, kiaa1211l.L	NA	Q6NV74	KIAA1211L	C2orf55	KIAA1211-like	0.24075324948724786	0.6902835759681109	FALSE	FALSE	FALSE
ENOG411CRK6	0	0	1	0	0.9954389325039961	0	0.9763098939548995	0	0	0.5	0.7038816194306735	ENOG411CRK6	Xelaev18001772m.g, Xelaev18017417m.g, Xelaev18009541m.g, Xelaev18023867m.g, Xelaev18044932m.g, Xelaev18047641m.g	Xenbase_9.1	dnah12.L, dnah3.L, dnah6.S, dnah1.L, dnah7.L, dnah3.S	NA	Q9P2D7, Q8WXX0, Q8TD57, Q9C0G6	DNAH1, DNAH7, DNAH3, DNAH6	DHC7 DNAHC1 KIAA1410, KIAA0944, DNAHC3B, DNAHC6 DNHL1 HL2 KIAA1697	Dynein, axonemal heavy chain	0.24075324948724786	0.6902835759681109	FALSE	FALSE	FALSE
ENOG411DFYR	0	0	1	0	0.9954389325039961	0	0.9763098939548995	0	0	0.5	0.7038816194306735	ENOG411DFYR	Xelaev18041347m.g	Xenbase_9.1	loc100492667.S	NA	NA	NA	NA	GDSL-like Lipase/Acylhydrolase	0.24075324948724786	0.6902835759681109	FALSE	FALSE	FALSE
ENOG411CQ96	0	0	1	0	0.9954389325039961	0	0.9763098939548995	0	0	0.5	0.7038816194306735	ENOG411CQ96	Xelaev18017614m.g, Xelaev18021107m.g	Xenbase_9.1	pnpla8.L, pnpla8.S	NA	Q9NP80	PNPLA8	IPLA22 IPLA2G	patatin-like phospholipase domain containing 8	0.24075324948724786	0.6902835759681109	FALSE	FALSE	FALSE
ENOG411CVPU	0	0	1	0	0.9954389325039961	0	0.9763098939548995	0	0	0.5	0.7038816194306735	ENOG411CVPU	148234538, Xelaev18032482m.g	GenBank, Xenbase_9.1	gpaa1.L	glycosylphosphatidylinositol anchor attachment protein 1 homolog [Xenopus laevis], NA	O43292	GPAA1	GAA1	glycosylphosphatidylinositol anchor attachment protein 1 homolog (yeast)	0.24075324948724786	0.6902835759681109	FALSE	FALSE	FALSE
ENOG411CY88	0	0	1	0	0.9954389325039961	0	0.9763098939548995	0	0	0.5	0.7038816194306735	ENOG411CY88	Xelaev18008161m.g	Xenbase_9.1	gfm2.L	NA	Q969S9	GFM2	EFG2	G elongation factor, mitochondrial 2	0.24075324948724786	0.6902835759681109	FALSE	FALSE	FALSE
ENOG411DDGI	0	0	1	0	0.9954389325039961	0	0.9763098939548995	0	0	0.5	0.7038816194306735	ENOG411DDGI	148222673, Xelaev18040069m.g	GenBank, Xenbase_9.1	rmdn3.L	regulator of microtubule dynamics protein 3 [Xenopus laevis], NA	NA	NA	NA	family with sequence similarity 82, member A2	0.24075324948724786	0.6902835759681109	FALSE	FALSE	FALSE
ENOG411CPBH	0	0	1	0	0.9954389325039961	0	0.9763098939548995	0	0	0.5	0.7038816194306735	ENOG411CPBH	Xelaev18013912m.g	Xenbase_9.1	clpb.L	NA	Q9H078	CLPB	HSP78 SKD3	ClpB caseinolytic peptidase B homolog (E. coli)	0.24075324948724786	0.6902835759681109	FALSE	FALSE	FALSE
Xelaev18029490m.g	0	0	1	0	0.9954389325039961	0	0.9763098939548995	0	0	0.5	0.7038816194306735	Xelaev18029490m.g	NA	Xenbase_9.1	dst.S	NA	NA	NA	NA	NA	0.24075324948724786	0.6902835759681109	FALSE	FALSE	FALSE
ENOG411CWX8	0	0	1	0	0.9954389325039961	0	0.9763098939548995	0	0	0.5	0.7038816194306735	ENOG411CWX8	148235429, Xelaev18024042m.g, Xelaev18025939m.g, Xelaev18017736m.g, Xelaev18021004m.g	GenBank, Xenbase_9.1	lamb2.L, lamb2.S, lamb1.L, lamb1.S	laminin, beta 2 (laminin S) precursor [Xenopus laevis], NA	P07942, P55268	LAMB1, LAMB2	NA, LAMS	laminin beta	0.24075324948724786	0.6902835759681109	FALSE	FALSE	FALSE
ENOG411D0EM	0	0	1	0	0.9954389325039961	0	0.9763098939548995	0	0	0.5	0.7038816194306735	ENOG411D0EM	Xelaev18018322m.g	Xenbase_9.1	vps33b.L	NA	Q9H267	VPS33B	NA	vacuolar protein sorting 33 homolog B (yeast)	0.24075324948724786	0.6902835759681109	FALSE	FALSE	FALSE
ENOG411CTIE	0	0	1	0	0.9954389325039961	0	0.9763098939548995	0	0	0.5	0.7038816194306735	ENOG411CTIE	Xelaev18016840m.g, Xelaev18019906m.g	Xenbase_9.1	loc101734703.L, loc101734703.S	NA	Q9NYQ8	FAT2	CDHF8 KIAA0811 MEGF1	FAT tumor suppressor homolog 2 (Drosophila)	0.24075324948724786	0.6902835759681109	FALSE	FALSE	FALSE
ENOG411CSIX	0	0	1	0	0.9954389325039961	0	0.9763098939548995	0	0	0.5	0.7038816194306735	ENOG411CSIX	147898847, Xelaev18034101m.g, Xelaev18032509m.g, Xelaev18025033m.g, Xelaev18022773m.g	GenBank, Xenbase_9.1	gpt2.S, gpt2.L, loc100494152.S, loc100494152.L	alanine aminotransferase 2 [Xenopus laevis], NA	P24298, Q8TD30	GPT, GPT2	AAT1 GPT1, AAT2 ALT2	transaminase (Alanine aminotransferase)	0.24075324948724786	0.6902835759681109	FALSE	FALSE	FALSE
ENOG411DFII	0	0	1	0	0.9954389325039961	0	0.9763098939548995	0	0	0.5	0.7038816194306735	ENOG411DFII	147899674, Xelaev18015457m.g, Xelaev18012880m.g	GenBank, Xenbase_9.1	egfl6.S, egfl6.L	epidermal growth factor-like protein 6 precursor [Xenopus laevis], NA	NA	NA	NA	EGF-like-domain, multiple 6	0.24075324948724786	0.6902835759681109	FALSE	FALSE	FALSE
ENOG411CTQH	0	0	1	0	0.9954389325039961	0	0.9763098939548995	0	0	0.5	0.7038816194306735	ENOG411CTQH	148236045, Xelaev18013852m.g	GenBank, Xenbase_9.1	fam76b.L	family with sequence similarity 76, member B [Xenopus laevis], NA	Q5HYJ3, Q8TAV0	FAM76B, FAM76A	NA	Family with sequence similarity 76, member	0.24075324948724786	0.6902835759681109	FALSE	FALSE	FALSE
ENOG411CZT5	0	0	1	0	0.9954389325039961	0	0.9763098939548995	0	0	0.5	0.7038816194306735	ENOG411CZT5	119850718, 47939687, 54261618, Xelaev18032097m.g, Xelaev18043428m.g, Xelaev18046154m.g, Xelaev18033783m.g	GenBank, Xenbase_9.1	sulf1.L, sulf2.L, sulf2.S, sulf1.S	LOC495271 protein [Xenopus laevis], LOC432214 protein [Xenopus laevis], NA	Q8IWU5, Q8IWU6	SULF2, SULF1	KIAA1247, KIAA1077	Sulfatase	0.24075324948724786	0.6902835759681109	FALSE	FALSE	FALSE
ENOG411DFQ2	0	0	1	0	0.9954389325039961	0	0.9763098939548995	0	0	0.5	0.7038816194306735	ENOG411DFQ2	Xelaev18025572m.g, Xelaev18023557m.g	Xenbase_9.1	ep300.S, ep300.L	NA	NA	NA	NA	Creb binding	0.24075324948724786	0.6902835759681109	FALSE	FALSE	FALSE
ENOG411CP99	0	0	1	0	0.9954389325039961	0	0.9763098939548995	0	0	0.5	0.7038816194306735	ENOG411CP99	Xelaev18017127m.g, Xelaev18018674m.g	Xenbase_9.1	dock2.L, dock5.L	NA	Q92608, Q9H7D0	DOCK2, DOCK5	KIAA0209, NA	dedicator of cyto-kinesis	0.24075324948724786	0.6902835759681109	FALSE	FALSE	FALSE
ENOG411CWWC	0	0	1	0	0.9954389325039961	0	0.9763098939548995	0	0	0.5	0.7038816194306735	ENOG411CWWC	147902382, Xelaev18000695m.g, Xelaev18034701m.g, Xelaev18037071m.g	GenBank, Xenbase_9.1	Xelaev18000695m.g, Xelaev18034701m.g, Xelaev18037071m.g	zinc finger, FYVE domain containing 27 [Xenopus laevis], NA	Q5T4F4	ZFYVE27	SPG33	zinc finger, FYVE domain containing 27	0.24075324948724786	0.6902835759681109	FALSE	FALSE	FALSE
ENOG411CS8D	0	0	1	0	0.9954389325039961	0	0.9763098939548995	0	0	0.5	0.7038816194306735	ENOG411CS8D	Xelaev18035562m.g	Xenbase_9.1	ttll10.L	NA	Q6ZVT0	TTLL10	NA	Tubulin tyrosine ligase-like family, member 10	0.24075324948724786	0.6902835759681109	FALSE	FALSE	FALSE
ENOG411DG8X	0	0	1	0	0.9954389325039961	0	0.9763098939548995	0	0	0.5	0.7038816194306735	ENOG411DG8X	Xelaev18015488m.g, Xelaev18012914m.g	Xenbase_9.1	sh3rf3.S, sh3rf3.L	NA	NA	NA	NA	SH3 domain containing ring finger 3	0.24075324948724786	0.6902835759681109	FALSE	FALSE	FALSE
ENOG411CUJ6	0	0	1	0	0.9954389325039961	0	0.9763098939548995	0	0	0.5	0.7038816194306735	ENOG411CUJ6	147903571, 148235431, Xelaev18033153m.g, Xelaev18031093m.g	GenBank, Xenbase_9.1	cnot10.S, cnot10.L	CCR4-NOT transcription complex subunit 10-A [Xenopus laevis], CCR4-NOT transcription complex subunit 10-B [Xenopus laevis], NA	Q9H9A5	CNOT10	NA	CCR4-NOT transcription complex subunit 10	0.24075324948724786	0.6902835759681109	FALSE	FALSE	FALSE
ENOG411D0JS	5	14	8	17	0.8027335292599369	0.18110306415471938	0.5612723946760556	0.08915777675966605	9.5	12.5	0.6956775267829756	ENOG411D0JS	147900772, 148231444, Xelaev18001214m.g	GenBank, Xenbase_9.1	nans.S	N-acetylneuraminic acid synthase [Xenopus laevis], uncharacterized protein LOC432051 [Xenopus laevis], NA	Q9NR45	NANS	SAS	N-acetylneuraminic acid synthase	0.24331540126423157	0.6902835759681109	FALSE	FALSE	FALSE
ENOG411CPZ6	3	7	6	8	0.9770506825627818	0.005064077688451338	0.7836648160125037	-0.003951627631815405	5	7	0.6944600068770472	ENOG411CPZ6	148235417, 148237715, Xelaev18025928m.g	GenBank, Xenbase_9.1	arih2.S	uncharacterized protein LOC399027 [Xenopus laevis], ariadne homolog 2 [Xenopus laevis], NA	O95376	ARIH2	ARI2 TRIAD1	ariadne homolog 2 (Drosophila)	0.24369688657428315	0.6902835759681109	FALSE	FALSE	FALSE
ENOG411D343	2	2	5	2	1.11483555352971	-0.13560641488097533	0.9763098939548995	-0.17387662907412774	2	3.5	0.6924195642739822	ENOG411D343	147904284, Xelaev18006241m.g, Xelaev18009771m.g	GenBank, Xenbase_9.1	atp5d.L, atp5d.S	ATP synthase, H+ transporting, mitochondrial F1 complex, delta subunit [Xenopus laevis], NA	P30049	ATP5F1D	ATP5D	ATP synthase H transporting mitochondrial F1 complex delta subunit	0.2443369415256765	0.6902835759681109	FALSE	FALSE	FALSE
ENOG411DD74	0	0	0	1	0	0.9688280389827452	0	0.8261233709258723	0	0.5	0.6850648761683639	ENOG411DD74	Xelaev18012944m.g, Xelaev18015510m.g	Xenbase_9.1	map4k4-like.L, map4k4-like.S	NA	O95819	MAP4K4	HGK KIAA0687 NIK	mitogen-activated protein kinase kinase kinase kinase 4	0.2466514915774212	0.6902835759681109	FALSE	FALSE	FALSE
ENOG411CXSD	0	0	0	1	0	0.9688280389827452	0	0.8261233709258723	0	0.5	0.6850648761683639	ENOG411CXSD	122936460, Xelaev18022476m.g	GenBank, Xenbase_9.1	slc7a6os.L	LOC100037092 protein [Xenopus laevis], NA	Q96CW6	SLC7A6OS	NA	solute carrier family 7, member 6 opposite strand	0.2466514915774212	0.6902835759681109	FALSE	FALSE	FALSE
ENOG411CV14	0	0	0	1	0	0.9688280389827452	0	0.8261233709258723	0	0.5	0.6850648761683639	ENOG411CV14	123916378, 46249864, Xelaev18043092m.g	GenBank, Xenbase_9.1	ttc25.L	RecName: Full=Tetratricopeptide repeat protein 25; Short=TPR repeat protein 25, LOC414568 protein [Xenopus laevis], NA	Q96NG3	TTC25	NA	Tetratricopeptide repeat domain 25	0.2466514915774212	0.6902835759681109	FALSE	FALSE	FALSE
ENOG411CUQ6	0	0	0	1	0	0.9688280389827452	0	0.8261233709258723	0	0.5	0.6850648761683639	ENOG411CUQ6	147899481, 148227694, 159794905, 213623852, 213626875, Xelaev18003582m.g	GenBank, Xenbase_9.1	pabpn1l.L	embryonic polyadenylate-binding protein 2-B [Xenopus laevis], embryonic polyadenylate-binding protein 2-A [Xenopus laevis], Chain A, Solution Nmr Structure Of The Protease-Resistent Domain Of Xenopus Laevis Epabp2, LOC403372 protein [Xenopus laevis], Embryonic poly(A) binding protein 2 [Xenopus laevis], NA	A6NDY0	PABPN1L	EPABP2 PABPNL1	poly(A) binding protein, nuclear 1-like (cytoplasmic)	0.2466514915774212	0.6902835759681109	FALSE	FALSE	FALSE
ENOG411CYAB	0	0	0	1	0	0.9688280389827452	0	0.8261233709258723	0	0.5	0.6850648761683639	ENOG411CYAB	Xelaev18025787m.g, Xelaev18023845m.g	Xenbase_9.1	vprbp.S, vprbp.L	NA	Q9Y4B6	DCAF1	KIAA0800 RIP VPRBP	Vpr (HIV-1) binding protein	0.2466514915774212	0.6902835759681109	FALSE	FALSE	FALSE
ENOG411D1QT	0	0	0	1	0	0.9688280389827452	0	0.8261233709258723	0	0.5	0.6850648761683639	ENOG411D1QT	147898435, 163916123, 213627682, 254813586, Xelaev18043578m.g, Xelaev18001512m.g	GenBank, Xenbase_9.1	birc7.L, Xetrov90022283m.L	baculoviral IAP repeat-containing protein 7-A [Xenopus laevis], LOC100137653 protein [Xenopus laevis], IAP-like protein [Xenopus laevis], RecName: Full=Baculoviral IAP repeat-containing protein 7-B; AltName: Full=E3 ubiquitin-protein ligase EIAP-B; AltName: Full=Embryonic/Egg IAP-B; Short=EIAP/XLX-B, NA	Q96CA5	BIRC7	KIAP LIVIN MLIAP RNF50	baculoviral IAP repeat containing 7	0.2466514915774212	0.6902835759681109	FALSE	FALSE	FALSE
ENOG411CR4J	0	0	0	1	0	0.9688280389827452	0	0.8261233709258723	0	0.5	0.6850648761683639	ENOG411CR4J	148224955, 148237227, Xelaev18016556m.g, Xelaev18013978m.g, Xelaev18016557m.g	GenBank, Xenbase_9.1	ilk.S, Xetrov90027597m.L, Xetrov90027597m.S	integrin-linked kinase [Xenopus laevis], MGC82989 protein [Xenopus laevis], NA	Q13418	ILK	ILK1 ILK2	integrin-linked kinase	0.2466514915774212	0.6902835759681109	FALSE	FALSE	FALSE
ENOG411CQMP	0	0	0	1	0	0.9688280389827452	0	0.8261233709258723	0	0.5	0.6850648761683639	ENOG411CQMP	Xelaev18044995m.g	Xenbase_9.1	pikfyve.L	NA	Q9Y2I7	PIKFYVE	KIAA0981 PIP5K3	Phosphoinositide kinase, FYVE finger containing	0.2466514915774212	0.6902835759681109	FALSE	FALSE	FALSE
ENOG411DAT4	0	0	0	1	0	0.9688280389827452	0	0.8261233709258723	0	0.5	0.6850648761683639	ENOG411DAT4	Xelaev18029041m.g, Xelaev18026794m.g	Xenbase_9.1	Xetrov90013533m.S, Xetrov90013533m.L	NA	NA	NA	NA	Inherit from KOG: Set and mynd domain containing	0.2466514915774212	0.6902835759681109	FALSE	FALSE	FALSE
ENOG411DGKE	0	0	0	1	0	0.9688280389827452	0	0.8261233709258723	0	0.5	0.6850648761683639	ENOG411DGKE	134024837, Xelaev18006062m.g	GenBank, Xenbase_9.1	hnrnpm.L	LOC100049142 protein [Xenopus laevis], NA	NA	NA	NA	Heterogeneous nuclear ribonucleoprotein M	0.2466514915774212	0.6902835759681109	FALSE	FALSE	FALSE
ENOG411CYBM	0	0	0	1	0	0.9688280389827452	0	0.8261233709258723	0	0.5	0.6850648761683639	ENOG411CYBM	120577563, 189441702, Xelaev18044710m.g	GenBank, Xenbase_9.1	sp3.L	LOC100037013 protein [Xenopus laevis], NA	Q02447	SP3	NA	Sp3 transcription factor	0.2466514915774212	0.6902835759681109	FALSE	FALSE	FALSE
ENOG411D0BI	0	0	0	1	0	0.9688280389827452	0	0.8261233709258723	0	0.5	0.6850648761683639	ENOG411D0BI	Xelaev18029127m.g	Xenbase_9.1	ppil4.S	NA	Q8WUA2	PPIL4	NA	Peptidylprolyl isomerase (Cyclophilin)-like 4	0.2466514915774212	0.6902835759681109	FALSE	FALSE	FALSE
ENOG411CREK	0	0	0	1	0	0.9688280389827452	0	0.8261233709258723	0	0.5	0.6850648761683639	ENOG411CREK	147905510, 148228090, Xelaev18026220m.g, Xelaev18028682m.g	GenBank, Xenbase_9.1	smyd2.L, smyd2.S	N-lysine methyltransferase SMYD2-B [Xenopus laevis], N-lysine methyltransferase SMYD2-A [Xenopus laevis], NA	Q9NRG4	SMYD2	KMT3C	SET and MYND domain containing 2	0.2466514915774212	0.6902835759681109	FALSE	FALSE	FALSE
ENOG411CXZ7	0	0	0	1	0	0.9688280389827452	0	0.8261233709258723	0	0.5	0.6850648761683639	ENOG411CXZ7	148227766, 49115664, 62132943, Xelaev18008925m.g, Xelaev18005114m.g	GenBank, Xenbase_9.1	stx18.S, stx18.L	syntaxin 18 [Xenopus laevis], LOC443606 protein [Xenopus laevis], Unknown (protein for IMAGE:6949850) [Xenopus laevis], NA	Q9P2W9	STX18	NA	syntaxin 18	0.2466514915774212	0.6902835759681109	FALSE	FALSE	FALSE
ENOG411D0HK	0	0	0	1	0	0.9688280389827452	0	0.8261233709258723	0	0.5	0.6850648761683639	ENOG411D0HK	147899639, 148229423, Xelaev18010860m.g	GenBank, Xenbase_9.1	AK6.S	TAF9 RNA polymerase II, TATA box binding protein (TBP)-associated factor, 32kDa [Xenopus laevis], MGC80885 protein [Xenopus laevis], NA	Q9Y3D8	AK6	CINAP	Adenylate kinase isoenzyme	0.2466514915774212	0.6902835759681109	FALSE	FALSE	FALSE
ENOG411CU6I	0	0	0	1	0	0.9688280389827452	0	0.8261233709258723	0	0.5	0.6850648761683639	ENOG411CU6I	148223543, Xelaev18039951m.g	GenBank, Xenbase_9.1	srp54.L	signal recognition particle 54kDa [Xenopus laevis], NA	P61011	SRP54	NA	signal recognition particle 54kDa	0.2466514915774212	0.6902835759681109	FALSE	FALSE	FALSE
ENOG411CSH9	0	0	0	1	0	0.9688280389827452	0	0.8261233709258723	0	0.5	0.6850648761683639	ENOG411CSH9	Xelaev18028864m.g	Xenbase_9.1	anapc1.S	NA	Q9H1A4	ANAPC1	TSG24	Anaphase promoting complex subunit 1	0.2466514915774212	0.6902835759681109	FALSE	FALSE	FALSE
ENOG411CPIZ	0	0	0	1	0	0.9688280389827452	0	0.8261233709258723	0	0.5	0.6850648761683639	ENOG411CPIZ	148224784, 148232182, 4033595, Xelaev18006923m.g, Xelaev18010143m.g, Xelaev18006924m.g, Xelaev18010139m.g	GenBank, Xenbase_9.1	tle4.L, tle1.S, tle1.L, tle4.S	MGC83762 protein [Xenopus laevis], transducin-like enhancer of split 4 [Xenopus laevis], groucho protein [Xenopus laevis], NA	Q04727, Q04724, Q04726	TLE4, TLE1, TLE3	GRG4 KIAA1261, NA, KIAA1547	transducin-like enhancer of split	0.2466514915774212	0.6902835759681109	FALSE	FALSE	FALSE
ENOG411CQ28	0	0	0	1	0	0.9688280389827452	0	0.8261233709258723	0	0.5	0.6850648761683639	ENOG411CQ28	148234551	GenBank	NA	adenylyltransferase and sulfurtransferase MOCS3 [Xenopus laevis]	O95396	MOCS3	UBA4	molybdenum cofactor synthesis 3	0.2466514915774212	0.6902835759681109	FALSE	FALSE	FALSE
ENOG411CQGM	0	0	0	1	0	0.9688280389827452	0	0.8261233709258723	0	0.5	0.6850648761683639	ENOG411CQGM	Xelaev18005231m.g, Xelaev18009005m.g	Xenbase_9.1	rbm47.L, rbm47.S	NA	A0AV96	RBM47	NA	RNA binding motif protein 47	0.2466514915774212	0.6902835759681109	FALSE	FALSE	FALSE
ENOG411CZI4	0	0	0	1	0	0.9688280389827452	0	0.8261233709258723	0	0.5	0.6850648761683639	ENOG411CZI4	147900987, Xelaev18025465m.g, Xelaev18023421m.g	GenBank, Xenbase_9.1	dbt.S, dbt.L	dihydrolipoamide branched chain transacylase E2 [Xenopus laevis], NA	P11182	DBT	BCATE2	dihydrolipoamide branched chain transacylase E2	0.2466514915774212	0.6902835759681109	FALSE	FALSE	FALSE
ENOG411CVFC	0	0	0	1	0	0.9688280389827452	0	0.8261233709258723	0	0.5	0.6850648761683639	ENOG411CVFC	126631424, 147904248, 148237681, 52139116, Xelaev18026070m.g, Xelaev18041228m.g	GenBank, Xenbase_9.1	fermt1.L, fermt2.S	LOC100049120 protein [Xenopus laevis], fermitin family member 2 [Xenopus laevis], fermitin family member 1 [Xenopus laevis], LOC494682 protein [Xenopus laevis], NA	Q96AC1, Q9BQL6	FERMT2, FERMT1	KIND2 MIG2 PLEKHC1, C20orf42 KIND1 URP1	fermitin family member	0.2466514915774212	0.6902835759681109	FALSE	FALSE	FALSE
ENOG411CT9R	0	0	0	1	0	0.9688280389827452	0	0.8261233709258723	0	0.5	0.6850648761683639	ENOG411CT9R	148222446, Xelaev18018936m.g, Xelaev18025409m.g, Xelaev18023330m.g, Xelaev18022978m.g, Xelaev18023353m.g	GenBank, Xenbase_9.1	lrrc8e.L, lrrc8c.S, loc100170560.L, loc100485206.L, lrrc8c.L	leucine-rich repeat-containing protein 8E [Xenopus laevis], NA	Q8TDW0, Q6NSJ5	LRRC8C, LRRC8E	AD158 FAD158, NA	leucine rich repeat containing 8 family, member	0.2466514915774212	0.6902835759681109	FALSE	FALSE	FALSE
ENOG411CVCP	0	0	0	1	0	0.9688280389827452	0	0.8261233709258723	0	0.5	0.6850648761683639	ENOG411CVCP	147903938, Xelaev18034908m.g	GenBank, Xenbase_9.1	aifm2.L	apoptosis-inducing factor 2 [Xenopus laevis], NA	NA	NA	NA	Apoptosis-inducing factor, mitochondrion-associated, 2	0.2466514915774212	0.6902835759681109	FALSE	FALSE	FALSE
ENOG411CRG4	0	0	0	1	0	0.9688280389827452	0	0.8261233709258723	0	0.5	0.6850648761683639	ENOG411CRG4	Xelaev18047958m.g	Xenbase_9.1	ppil3.S	NA	Q9H2H8	PPIL3	NA	PPIases accelerate the folding of proteins (By similarity)	0.2466514915774212	0.6902835759681109	FALSE	FALSE	FALSE
ENOG411CVAH	0	0	0	1	0	0.9688280389827452	0	0.8261233709258723	0	0.5	0.6850648761683639	ENOG411CVAH	148223940, Xelaev18026802m.g	GenBank, Xenbase_9.1	ccdc94.L	coiled-coil domain containing 94 [Xenopus laevis], NA	Q9BW85	YJU2	CCDC94	Coiled-coil domain containing 94	0.2466514915774212	0.6902835759681109	FALSE	FALSE	FALSE
ENOG411DG5B	0	0	0	1	0	0.9688280389827452	0	0.8261233709258723	0	0.5	0.6850648761683639	ENOG411DG5B	148224899, 148228058, Xelaev18037514m.g	GenBank, Xenbase_9.1	atad3a.S	ATPase family AAA domain-containing protein 3-A [Xenopus laevis], ATPase family AAA domain-containing protein 3-B [Xenopus laevis], NA	Q5T9A4	ATAD3B	KIAA1273 TOB3	ATPase family, AAA	0.2466514915774212	0.6902835759681109	FALSE	FALSE	FALSE
ENOG411CR2H	0	0	0	1	0	0.9688280389827452	0	0.8261233709258723	0	0.5	0.6850648761683639	ENOG411CR2H	Xelaev18042287m.g, Xelaev18038956m.g	Xenbase_9.1	znf185.S, znf185.L	NA	NA	NA	NA	Zinc finger protein 185 (LIM domain)	0.2466514915774212	0.6902835759681109	FALSE	FALSE	FALSE
ENOG411D14M	0	0	0	1	0	0.9688280389827452	0	0.8261233709258723	0	0.5	0.6850648761683639	ENOG411D14M	Xelaev18028259m.g, Xelaev18030216m.g	Xenbase_9.1	pnoc.L, pnoc.S	NA	Q13519	PNOC	OFQ	Prepronociceptin	0.2466514915774212	0.6902835759681109	FALSE	FALSE	FALSE
ENOG411CQ9I	0	0	0	1	0	0.9688280389827452	0	0.8261233709258723	0	0.5	0.6850648761683639	ENOG411CQ9I	76780352, Xelaev18018064m.g, Xelaev18020756m.g	GenBank, Xenbase_9.1	mpi.L, mpi.S	LOC733350 protein [Xenopus laevis], NA	P34949	MPI	PMI1	mannose phosphate isomerase	0.2466514915774212	0.6902835759681109	FALSE	FALSE	FALSE
ENOG411CTGR	0	0	0	1	0	0.9688280389827452	0	0.8261233709258723	0	0.5	0.6850648761683639	ENOG411CTGR	Xelaev18013396m.g, Xelaev18047418m.g, Xelaev18045027m.g	Xenbase_9.1	gls2.L, gls.S, gls.L	NA	O94925, Q9UI32	GLS, GLS2	GLS1 KIAA0838, GA	Glutaminase	0.2466514915774212	0.6902835759681109	FALSE	FALSE	FALSE
ENOG411DFG2	0	0	0	1	0	0.9688280389827452	0	0.8261233709258723	0	0.5	0.6850648761683639	ENOG411DFG2	Xelaev18033776m.g, Xelaev18032083m.g	Xenbase_9.1	vcpip1.S, vcpip1.L	NA	NA	NA	NA	Valosin containing protein (P97) p47 complex interacting protein 1	0.2466514915774212	0.6902835759681109	FALSE	FALSE	FALSE
ENOG411DB5C	0	0	0	1	0	0.9688280389827452	0	0.8261233709258723	0	0.5	0.6850648761683639	ENOG411DB5C	147902581, 148222983, 213623934, 341823623, Xelaev18012449m.g	GenBank, Xenbase_9.1	clspn.L	claspin [Xenopus laevis], hypothetical protein LOC779187 [Xenopus laevis], LOC398192 protein [Xenopus laevis], NA	NA	NA	NA	Inherit from KOG: mitotic DNA replication checkpoint	0.2466514915774212	0.6902835759681109	FALSE	FALSE	FALSE
ENOG411CP7P	0	0	0	1	0	0.9688280389827452	0	0.8261233709258723	0	0.5	0.6850648761683639	ENOG411CP7P	21634428, Xelaev18033182m.g, Xelaev18031123m.g	GenBank, Xenbase_9.1	pik3r4.S, pik3r4.L	adaptor protein p150 [Xenopus laevis], NA	Q99570	PIK3R4	VPS15	phosphoinositide-3-kinase, regulatory subunit 4	0.2466514915774212	0.6902835759681109	FALSE	FALSE	FALSE
ENOG411CTKK	0	0	0	1	0	0.9688280389827452	0	0.8261233709258723	0	0.5	0.6850648761683639	ENOG411CTKK	147898417, 62739361, Xelaev18013460m.g, Xelaev18044834m.g, Xelaev18032576m.g, Xelaev18003160m.g, Xelaev18015953m.g, Xelaev18047281m.g	GenBank, Xenbase_9.1	agap2.L, agap1.L, Xelaev18032576m.g, agap3.L, agap2.S, agap1.S	arf-GAP with GTPase, ANK repeat and PH domain-containing protein 1 [Xenopus laevis], Unknown (protein for MGC:115253) [Xenopus laevis], NA	Q9UPQ3, Q96P47, Q99490	AGAP1, AGAP3, AGAP2	CENTG2 KIAA1099, CENTG3, CENTG1 KIAA0167	ArfGAP with GTPase domain, ankyrin repeat and PH domain	0.2466514915774212	0.6902835759681109	FALSE	FALSE	FALSE
ENOG411CX4D	0	0	0	1	0	0.9688280389827452	0	0.8261233709258723	0	0.5	0.6850648761683639	ENOG411CX4D	147903317, Xelaev18026748m.g	GenBank, Xenbase_9.1	rab32.L	RAB32, member RAS oncogene family [Xenopus laevis], NA	Q13637	RAB32	NA	RAB32, member RAS oncogene family	0.2466514915774212	0.6902835759681109	FALSE	FALSE	FALSE
ENOG411CU7G	0	0	0	1	0	0.9688280389827452	0	0.8261233709258723	0	0.5	0.6850648761683639	ENOG411CU7G	148228553, 153791802, 15808364, 160420169, Xelaev18025056m.g, Xelaev18018940m.g, Xelaev18022902m.g	GenBank, Xenbase_9.1	prkacb.S, prkaca.L, prkacb.L	protein kinase, cAMP-dependent, catalytic, beta [Xenopus laevis], protein kinase, cAMP-dependent, catalytic, alpha [Xenopus laevis], cAMP-dependent protein kinase catalytic subunit beta [Xenopus laevis], protein kinase, cAMP-dependent, catalytic, beta b [Xenopus laevis], NA	P17612, P22694	PRKACA, PRKACB	PKACA, NA	Protein kinase, cAMP-dependent, catalytic	0.2466514915774212	0.6902835759681109	FALSE	FALSE	FALSE
ENOG411CXZ8	0	0	0	1	0	0.9688280389827452	0	0.8261233709258723	0	0.5	0.6850648761683639	ENOG411CXZ8	Xelaev18008652m.g	Xenbase_9.1	htra2.S	NA	O43464	HTRA2	OMI PRSS25	HtrA serine peptidase 2	0.2466514915774212	0.6902835759681109	FALSE	FALSE	FALSE
ENOG411CQIM	0	0	0	1	0	0.9688280389827452	0	0.8261233709258723	0	0.5	0.6850648761683639	ENOG411CQIM	148226471, 148228853, 9757702, Xelaev18006070m.g, Xelaev18035255m.g, Xelaev18037322m.g	GenBank, Xenbase_9.1	tmprss9.L, st14.L, st14.S	matripase b [Xenopus laevis], matriptase a [Xenopus laevis], homolog of human MT-SP1 [Xenopus laevis], NA	Q9Y5Y6	ST14	PRSS14 SNC19 TADG15	suppression of tumorigenicity 14 (colon carcinoma	0.2466514915774212	0.6902835759681109	FALSE	FALSE	FALSE
ENOG411CRIG	0	0	0	1	0	0.9688280389827452	0	0.8261233709258723	0	0.5	0.6850648761683639	ENOG411CRIG	148222160, 37544024, Xelaev18035230m.g	GenBank, Xenbase_9.1	ncapd3.L	non-SMC condensin II complex, subunit D3 [Xenopus laevis], condensin II non-SMC subunit [Xenopus laevis], NA	P42695	NCAPD3	CAPD3 KIAA0056	Non-SMC condensin II complex, subunit D3	0.2466514915774212	0.6902835759681109	FALSE	FALSE	FALSE
ENOG411CPS3	0	0	0	1	0	0.9688280389827452	0	0.8261233709258723	0	0.5	0.6850648761683639	ENOG411CPS3	161612276, 49115005, 66911545, Xelaev18015650m.g, Xelaev18038987m.g, Xelaev18013127m.g	GenBank, Xenbase_9.1	dock9.S, dock11.L, dock9.L	LOC100127329 protein [Xenopus laevis], LOC443586 protein [Xenopus laevis], NA	Q5JSL3, Q9BZ29	DOCK11, DOCK9	ZIZ2, KIAA1058 ZIZ1	dedicator of cytokinesis	0.2466514915774212	0.6902835759681109	FALSE	FALSE	FALSE
ENOG411CRVR	0	0	0	1	0	0.9688280389827452	0	0.8261233709258723	0	0.5	0.6850648761683639	ENOG411CRVR	147905468, Xelaev18030071m.g	GenBank, Xenbase_9.1	cpsf3.S	cleavage and polyadenylation specific factor 3, 73kDa [Xenopus laevis], NA	Q9UKF6	CPSF3	CPSF73	cleavage and polyadenylation specific factor 3, 73kDa	0.2466514915774212	0.6902835759681109	FALSE	FALSE	FALSE
ENOG411D3U2	0	0	0	1	0	0.9688280389827452	0	0.8261233709258723	0	0.5	0.6850648761683639	ENOG411D3U2	Xelaev18014314m.g	Xenbase_9.1	mrps6.S	NA	P82932	MRPS6	C21orf101 RPMS6	mitochondrial ribosomal protein S6	0.2466514915774212	0.6902835759681109	FALSE	FALSE	FALSE
ENOG411DGJC	0	0	0	1	0	0.9688280389827452	0	0.8261233709258723	0	0.5	0.6850648761683639	ENOG411DGJC	Xelaev18033462m.g, Xelaev18031539m.g	Xenbase_9.1	kiaa1468.S, kiaa1468.L	NA	NA	NA	NA	kiaa1468	0.2466514915774212	0.6902835759681109	FALSE	FALSE	FALSE
ENOG411D00A	0	0	0	1	0	0.9688280389827452	0	0.8261233709258723	0	0.5	0.6850648761683639	ENOG411D00A	148234801, 148235124, 42560359, Xelaev18010660m.g	GenBank, Xenbase_9.1	brap.S	BRCA1 associated protein [Xenopus laevis], IMP protein [Xenopus laevis], NA	Q7Z569	BRAP	RNF52	BRCA1 associated protein	0.2466514915774212	0.6902835759681109	FALSE	FALSE	FALSE
ENOG411CU3X	0	0	0	1	0	0.9688280389827452	0	0.8261233709258723	0	0.5	0.6850648761683639	ENOG411CU3X	239923269, 321172634, 333891301, Xelaev18018569m.g, Xelaev18034674m.g, Xelaev18036961m.g	GenBank, Xenbase_9.1	prom2.L, Xetrov90017730m.L, Xetrov90017730m.S	prominin-3 transcript variant 1 [Xenopus laevis], prominin-2 [Xenopus laevis], prominin-3 transcript variant 2 [Xenopus laevis], NA	Q8N271	PROM2	PROML2	prominin 2	0.2466514915774212	0.6902835759681109	FALSE	FALSE	FALSE
ENOG411CU8N	0	0	0	1	0	0.9688280389827452	0	0.8261233709258723	0	0.5	0.6850648761683639	ENOG411CU8N	148231970, Xelaev18023278m.g	GenBank, Xenbase_9.1	acbd6.L	acyl-CoA-binding domain-containing protein 6 [Xenopus laevis], NA	Q9BR61	ACBD6	NA	Acyl-CoA binding domain containing 6	0.2466514915774212	0.6902835759681109	FALSE	FALSE	FALSE
ENOG411CYIC	0	0	0	1	0	0.9688280389827452	0	0.8261233709258723	0	0.5	0.6850648761683639	ENOG411CYIC	117558575, Xelaev18010008m.g, Xelaev18006721m.g	GenBank, Xenbase_9.1	haus6.S, haus6.L	LOC100036802 protein [Xenopus laevis], NA	Q7Z4H7	HAUS6	DGT6 FAM29A KIAA1574	HAUS augmin-like complex subunit 6	0.2466514915774212	0.6902835759681109	FALSE	FALSE	FALSE
ENOG411CTYN	0	0	0	1	0	0.9688280389827452	0	0.8261233709258723	0	0.5	0.6850648761683639	ENOG411CTYN	148224746, 213623726, Xelaev18031897m.g, Xelaev18030088m.g, Xelaev18028054m.g, Xelaev18033639m.g	GenBank, Xenbase_9.1	rock1.L, rock2.S, rock2.L, rock1.S	Rho-associated, coiled-coil containing protein kinase 2 [Xenopus laevis], Unknown (protein for MGC:196865) [Xenopus laevis], NA	O75116, Q13464	ROCK2, ROCK1	KIAA0619, NA	rho-associated, coiled-coil containing protein kinase	0.2466514915774212	0.6902835759681109	FALSE	FALSE	FALSE
ENOG411CP7B	0	0	0	1	0	0.9688280389827452	0	0.8261233709258723	0	0.5	0.6850648761683639	ENOG411CP7B	Xelaev18022454m.g	Xenbase_9.1	heatr3.L	NA	Q7Z4Q2	HEATR3	NA	HEAT repeat containing 3	0.2466514915774212	0.6902835759681109	FALSE	FALSE	FALSE
ENOG411DGFX	0	0	0	1	0	0.9688280389827452	0	0.8261233709258723	0	0.5	0.6850648761683639	ENOG411DGFX	148224578, Xelaev18044019m.g, Xelaev18046665m.g	GenBank, Xenbase_9.1	lrrc59.L, lrrc59.S	leucine-rich repeat-containing protein 59 [Xenopus laevis], NA	NA	NA	NA	Leucine rich repeat containing 59	0.2466514915774212	0.6902835759681109	FALSE	FALSE	FALSE
ENOG411CXWB	0	0	0	1	0	0.9688280389827452	0	0.8261233709258723	0	0.5	0.6850648761683639	ENOG411CXWB	148234435, 54035096	GenBank	NA	NIN1/RPN12 binding protein 1 homolog [Xenopus laevis], LOC398701 protein [Xenopus laevis]	Q9ULX3	NOB1	ART4 NOB1P PSMD8BP1	NIN1 RPN12 binding protein 1 homolog (S. cerevisiae)	0.2466514915774212	0.6902835759681109	FALSE	FALSE	FALSE
ENOG411CSI1	0	0	0	1	0	0.9688280389827452	0	0.8261233709258723	0	0.5	0.6850648761683639	ENOG411CSI1	148235180, Xelaev18007607m.g	GenBank, Xenbase_9.1	sirt4.L	sirtuin 4 [Xenopus laevis], NA	Q9Y6E7	SIRT4	SIR2L4	NAD-dependent protein ADP-ribosyl transferase. Catalyzes the transfer of ADP-ribosyl groups onto target proteins, including mitochondrial GLUD1. Inhibits GLUD1 enzyme activity. Down- regulates insulin secretion. Has no detectable protein deacetylase activity (By similarity)	0.2466514915774212	0.6902835759681109	FALSE	FALSE	FALSE
ENOG411CTIK	0	0	0	1	0	0.9688280389827452	0	0.8261233709258723	0	0.5	0.6850648761683639	ENOG411CTIK	147905442, Xelaev18038637m.g	GenBank, Xenbase_9.1	igbp1.L	immunoglobulin (CD79A) binding protein 1 [Xenopus laevis], NA	P78318, A0A1W2PR95	IGBP1, NA	IBP1, NA	Immunoglobulin (CD79A) binding protein 1	0.2466514915774212	0.6902835759681109	FALSE	FALSE	FALSE
ENOG411CQ4K	0	0	0	1	0	0.9688280389827452	0	0.8261233709258723	0	0.5	0.6850648761683639	ENOG411CQ4K	148225907, Xelaev18037525m.g	GenBank, Xenbase_9.1	sdf4.S	45 kDa calcium-binding protein precursor [Xenopus laevis], NA	Q9BRK5	SDF4	CAB45	Stromal cell derived factor 4	0.2466514915774212	0.6902835759681109	FALSE	FALSE	FALSE
ENOG411D0ME	0	0	0	1	0	0.9688280389827452	0	0.8261233709258723	0	0.5	0.6850648761683639	ENOG411D0ME	Xelaev18031352m.g	Xenbase_9.1	exoc3.L	NA	O60645	EXOC3	SEC6 SEC6L1	Exocyst complex component 3	0.2466514915774212	0.6902835759681109	FALSE	FALSE	FALSE
ENOG411CUV3	0	0	0	1	0	0.9688280389827452	0	0.8261233709258723	0	0.5	0.6850648761683639	ENOG411CUV3	Xelaev18026244m.g	Xenbase_9.1	rab3gap2.L	NA	Q9H2M9	RAB3GAP2	KIAA0839	RAB3 GTPase activating protein subunit 2 (Non-catalytic)	0.2466514915774212	0.6902835759681109	FALSE	FALSE	FALSE
ENOG411CY44	0	0	0	1	0	0.9688280389827452	0	0.8261233709258723	0	0.5	0.6850648761683639	ENOG411CY44	148227080, Xelaev18044070m.g	GenBank, Xenbase_9.1	galk1.L	galactokinase 1 [Xenopus laevis], NA	P51570	GALK1	GALK	galactokinase 1	0.2466514915774212	0.6902835759681109	FALSE	FALSE	FALSE
ENOG411CSIV	0	0	0	1	0	0.9688280389827452	0	0.8261233709258723	0	0.5	0.6850648761683639	ENOG411CSIV	Xelaev18024790m.g	Xenbase_9.1	bbs2.S	NA	Q9BXC9	BBS2	NA	Bardet-Biedl syndrome 2	0.2466514915774212	0.6902835759681109	FALSE	FALSE	FALSE
ENOG411CP9F	0	0	0	1	0	0.9688280389827452	0	0.8261233709258723	0	0.5	0.6850648761683639	ENOG411CP9F	Xelaev18045908m.g, Xelaev18043146m.g	Xenbase_9.1	rapgefl1.S, rapgefl1.L	NA	Q9UHV5	RAPGEFL1	NA	Rap guanine nucleotide exchange factor (GEF)-like 1	0.2466514915774212	0.6902835759681109	FALSE	FALSE	FALSE
ENOG411DEP0	0	0	0	1	0	0.9688280389827452	0	0.8261233709258723	0	0.5	0.6850648761683639	ENOG411DEP0	148224538, 24210495, 24210497, 5901737, Xelaev18006193m.g	GenBank, Xenbase_9.1	mbd3.L	methyl-CpG binding domain protein 3 [Xenopus laevis], methyl-CpG binding protein MBD3 [Xenopus laevis], methyl-CpG binding protein MBD3 long form [Xenopus laevis], NA	NA	NA	NA	methyl-CpG binding domain protein 3	0.2466514915774212	0.6902835759681109	FALSE	FALSE	FALSE
ENOG411D0S9	0	0	0	1	0	0.9688280389827452	0	0.8261233709258723	0	0.5	0.6850648761683639	ENOG411D0S9	Xelaev18040958m.g	Xenbase_9.1	msto1.L	NA	Q9BUK6	MSTO1	NA	Misato homolog 1 (Drosophila)	0.2466514915774212	0.6902835759681109	FALSE	FALSE	FALSE
ENOG411D077	0	0	0	1	0	0.9688280389827452	0	0.8261233709258723	0	0.5	0.6850648761683639	ENOG411D077	148237165, Xelaev18037175m.g, Xelaev18035192m.g	GenBank, Xenbase_9.1	exosc10.S, exosc10.L	exosome component 10 [Xenopus laevis], NA	Q01780	EXOSC10	PMSCL PMSCL2 RRP6	Exosome component 10	0.2466514915774212	0.6902835759681109	FALSE	FALSE	FALSE
ENOG411CW75	0	0	0	1	0	0.9688280389827452	0	0.8261233709258723	0	0.5	0.6850648761683639	ENOG411CW75	147905636, 148234368, Xelaev18043431m.g, Xelaev18031960m.g, Xelaev18033681m.g, Xelaev18046159m.g	GenBank, Xenbase_9.1	b4galt6.L, Xelaev18031960m.g, Xelaev18033681m.g, b4galt6.S	UDP-Gal:betaGlcNAc beta 1,4- galactosyltransferase, polypeptide 6 [Xenopus laevis], UDP-Gal:betaGlcNAc beta 1,4- galactosyltransferase, polypeptide 5 [Xenopus laevis], NA	Q9UBX8, O43286	B4GALT6, B4GALT5	NA	UDP-Gal betaGlcNAc beta 1,4- galactosyltransferase, polypeptide	0.2466514915774212	0.6902835759681109	FALSE	FALSE	FALSE
ENOG411CSK0	0	0	0	1	0	0.9688280389827452	0	0.8261233709258723	0	0.5	0.6850648761683639	ENOG411CSK0	148228358, Xelaev18021930m.g	GenBank, Xenbase_9.1	nup160.L	nucleoporin 160kDa [Xenopus laevis], NA	Q12769	NUP160	KIAA0197 NUP120	Nucleoporin 160kDa	0.2466514915774212	0.6902835759681109	FALSE	FALSE	FALSE
ENOG411CXC7	0	0	0	1	0	0.9688280389827452	0	0.8261233709258723	0	0.5	0.6850648761683639	ENOG411CXC7	Xelaev18045625m.g	Xenbase_9.1	stk36.L	NA	Q9NRP7	STK36	KIAA1278	Serine threonine kinase 36	0.2466514915774212	0.6902835759681109	FALSE	FALSE	FALSE
ENOG411CXHG	0	0	0	1	0	0.9688280389827452	0	0.8261233709258723	0	0.5	0.6850648761683639	ENOG411CXHG	147899744, 148235361, 7248892, Xelaev18035392m.g, Xelaev18012829m.g, Xelaev18036019m.g, Xelaev18037756m.g, Xelaev18000064m.g, Xelaev18015415m.g	GenBank, Xenbase_9.1	cbl.L, cblb.L, loc100489764.L, loc100489764.S, cbl.S, cblb.S	E3 ubiquitin-protein ligase CBL-B-A [Xenopus laevis], E3 ubiquitin-protein ligase CBL-B-B [Xenopus laevis], Cbl proto-oncogene protein [Xenopus laevis], NA	Q13191, P22681	CBLB, CBL	RNF56, CBL2 RNF55	Cbl proto-oncogene, E3 ubiquitin protein ligase	0.2466514915774212	0.6902835759681109	FALSE	FALSE	FALSE
ENOG411CSW2	0	0	0	1	0	0.9688280389827452	0	0.8261233709258723	0	0.5	0.6850648761683639	ENOG411CSW2	1071782, 51873790, Xelaev18041786m.g, Xelaev18038615m.g	GenBank, Xenbase_9.1	ssr4.S, ssr4.L	unnamed protein product [Xenopus laevis], LOC397945 protein [Xenopus laevis], NA	P51571	SSR4	TRAPD	Signal sequence receptor, delta	0.2466514915774212	0.6902835759681109	FALSE	FALSE	FALSE
ENOG411CTSI	0	0	0	1	0	0.9688280389827452	0	0.8261233709258723	0	0.5	0.6850648761683639	ENOG411CTSI	148229521, Xelaev18012838m.g	GenBank, Xenbase_9.1	kiaa1524.L	protein CIP2A homolog [Xenopus laevis], NA	Q8TCG1	CIP2A	KIAA1524	kiaa1524	0.2466514915774212	0.6902835759681109	FALSE	FALSE	FALSE
ENOG411CQKH	0	0	0	1	0	0.9688280389827452	0	0.8261233709258723	0	0.5	0.6850648761683639	ENOG411CQKH	111185524, 146324988, 49256048, Xelaev18005019m.g	GenBank, Xenbase_9.1	maea.L	Maea protein [Xenopus laevis], RecName: Full=Macrophage erythroblast attacher, MGC81431 protein [Xenopus laevis], NA	Q7L5Y9	MAEA	EMP	Macrophage erythroblast attacher	0.2466514915774212	0.6902835759681109	FALSE	FALSE	FALSE
ENOG411CXMP	0	0	0	1	0	0.9688280389827452	0	0.8261233709258723	0	0.5	0.6850648761683639	ENOG411CXMP	148230204, 190360172, Xelaev18010942m.g	GenBank, Xenbase_9.1	trappc13-like.S	chromosome 5 open reading frame 44 [Xenopus laevis], RecName: Full=UPF0533 protein C5orf44 homolog, NA	A5PLN9	TRAPPC13	C5orf44	chromosome 5 open reading frame 44	0.2466514915774212	0.6902835759681109	FALSE	FALSE	FALSE
ENOG411CUU7	0	0	0	1	0	0.9688280389827452	0	0.8261233709258723	0	0.5	0.6850648761683639	ENOG411CUU7	148234508	GenBank	NA	tetratricopeptide repeat protein 30A [Xenopus laevis]	Q8N4P2, Q86WT1	TTC30B, TTC30A	NA	Required for polyglutamylation of axonemal tubulin (By similarity). Plays a role in anterograde intraflagellar transport (IFT), the process by which cilia precursors are transported from the base of the cilium to the site of their incorporation at the tip (By similarity)	0.2466514915774212	0.6902835759681109	FALSE	FALSE	FALSE
ENOG411CR9Y	0	0	0	1	0	0.9688280389827452	0	0.8261233709258723	0	0.5	0.6850648761683639	ENOG411CR9Y	148234567, Xelaev18010657m.g, Xelaev18007845m.g	GenBank, Xenbase_9.1	pptc7.S, pptc7.L	protein phosphatase PTC7 homolog [Xenopus laevis], NA	Q8NI37	PPTC7	TAPP2C	PTC7 protein phosphatase homolog (S. cerevisiae)	0.2466514915774212	0.6902835759681109	FALSE	FALSE	FALSE
ENOG411CTIR	0	0	0	1	0	0.9688280389827452	0	0.8261233709258723	0	0.5	0.6850648761683639	ENOG411CTIR	147901980, Xelaev18037422m.g	GenBank, Xenbase_9.1	tbcel.S	tubulin folding cofactor E-like [Xenopus laevis], NA	Q5QJ74, A0A2R8YFB7	TBCEL, NA	LRRC35, NA	Tubulin folding cofactor E-like	0.2466514915774212	0.6902835759681109	FALSE	FALSE	FALSE
ENOG411DESQ	0	0	0	1	0	0.9688280389827452	0	0.8261233709258723	0	0.5	0.6850648761683639	ENOG411DESQ	Xelaev18021948m.g	Xenbase_9.1	olfml1.L	NA	NA	NA	NA	Olfactomedin-like 1	0.2466514915774212	0.6902835759681109	FALSE	FALSE	FALSE
ENOG411CREV	0	0	0	1	0	0.9688280389827452	0	0.8261233709258723	0	0.5	0.6850648761683639	ENOG411CREV	148222244, 148227097, 148237048, 213623966, 213626063, Xelaev18040858m.g, Xelaev18011096m.g, Xelaev18008450m.g, Xelaev18042960m.g	GenBank, Xenbase_9.1	smad4.2.L, smad4.1.S, smad4.1.L, smad4.2.S	SMAD family member 4, gene 2 [Xenopus laevis], SMAD family member 4, gene 1 [Xenopus laevis], Smad10 protein [Xenopus laevis], NA	Q13485	SMAD4	DPC4 MADH4	SMAD family member 4	0.2466514915774212	0.6902835759681109	FALSE	FALSE	FALSE
ENOG411CTRN	0	0	0	1	0	0.9688280389827452	0	0.8261233709258723	0	0.5	0.6850648761683639	ENOG411CTRN	28839642, 349501039, 349501040, 50417706, Xelaev18042467m.g	GenBank, Xenbase_9.1	abhd16a.S	Bat5-prov protein [Xenopus laevis], abhydrolase domain-containing protein 16A [Xenopus laevis], NA	O95870	ABHD16A	BAT5 G5 NG26	Abhydrolase domain containing	0.2466514915774212	0.6902835759681109	FALSE	FALSE	FALSE
ENOG411CS7Y	0	0	0	1	0	0.9688280389827452	0	0.8261233709258723	0	0.5	0.6850648761683639	ENOG411CS7Y	148229989, Xelaev18026633m.g	GenBank, Xenbase_9.1	nphp1.L	nephronophthisis 1 (juvenile) [Xenopus laevis], NA	O15259	NPHP1	NPH1	nephronophthisis 1 (juvenile)	0.2466514915774212	0.6902835759681109	FALSE	FALSE	FALSE
ENOG411CQGN	0	0	0	1	0	0.9688280389827452	0	0.8261233709258723	0	0.5	0.6850648761683639	ENOG411CQGN	148224004, Xelaev18003605m.g, Xelaev18013888m.g, Xelaev18013887m.g	GenBank, Xenbase_9.1	Xelaev18003605m.g, Xelaev18013888m.g, Xelaev18013887m.g	integrator complex subunit 4 [Xenopus laevis], NA	Q96HW7	INTS4	NA	integrator complex subunit 4	0.2466514915774212	0.6902835759681109	FALSE	FALSE	FALSE
ENOG411CQ4N	0	0	0	1	0	0.9688280389827452	0	0.8261233709258723	0	0.5	0.6850648761683639	ENOG411CQ4N	147899260, 148225280, 148230120, 27924281, Xelaev18001011m.g, Xelaev18037289m.g, Xelaev18019507m.g, Xelaev18035200m.g, Xelaev18027734m.g, Xelaev18029825m.g	GenBank, Xenbase_9.1	plod3.S, plod1.S, plod3.L, plod1.L, plod2.L, plod2.S	procollagen-lysine, 2-oxoglutarate 5-dioxygenase 3 precursor [Xenopus laevis], uncharacterized protein LOC495489 precursor [Xenopus laevis], procollagen-lysine, 2-oxoglutarate 5-dioxygenase 1 precursor [Xenopus laevis], LOC398437 protein [Xenopus laevis], NA	Q02809, O00469, O60568	PLOD1, PLOD2, PLOD3	LLH PLOD, NA	Procollagen-lysine 2-oxoglutarate 5-dioxygenase	0.2466514915774212	0.6902835759681109	FALSE	FALSE	FALSE
ENOG411CWFA	0	0	0	1	0	0.9688280389827452	0	0.8261233709258723	0	0.5	0.6850648761683639	ENOG411CWFA	148226370, 148227662, Xelaev18015751m.g, Xelaev18013233m.g	GenBank, Xenbase_9.1	elf1.S, elf1.L	E74-like factor 1 (ets domain transcription factor) [Xenopus laevis], NA	Q99607, P32519	ELF4, ELF1	ELFR MEF, NA	Ets domain transcription factor	0.2466514915774212	0.6902835759681109	FALSE	FALSE	FALSE
ENOG411DGDM	0	0	0	1	0	0.9688280389827452	0	0.8261233709258723	0	0.5	0.6850648761683639	ENOG411DGDM	Xelaev18030783m.g	Xenbase_9.1	armc3.L	NA	NA	NA	NA	armadillo repeat containing 3	0.2466514915774212	0.6902835759681109	FALSE	FALSE	FALSE
ENOG411CR3V	0	0	0	1	0	0.9688280389827452	0	0.8261233709258723	0	0.5	0.6850648761683639	ENOG411CR3V	Xelaev18010668m.g, Xelaev18007861m.g	Xenbase_9.1	mapkapk5.S, mapkapk5.L	NA	Q8IW41	MAPKAPK5	PRAK	Mitogen-activated protein kinase-activated protein kinase 5	0.2466514915774212	0.6902835759681109	FALSE	FALSE	FALSE
ENOG411CSBF	0	0	0	1	0	0.9688280389827452	0	0.8261233709258723	0	0.5	0.6850648761683639	ENOG411CSBF	147899348, 148235409, Xelaev18041357m.g, Xelaev18026454m.g, Xelaev18039489m.g	GenBank, Xenbase_9.1	sptlc2.S, sptlc3-like.L, sptlc2.L	serine palmitoyltransferase, long chain base subunit 2 [Xenopus laevis], serine palmitoyltransferase, long chain base subunit 3 [Xenopus laevis], NA	O15270, Q9NUV7	SPTLC2, SPTLC3	KIAA0526 LCB2, C20orf38 SPTLC2L	serine palmitoyltransferase, long chain base subunit	0.2466514915774212	0.6902835759681109	FALSE	FALSE	FALSE
ENOG411CZNX	0	0	0	1	0	0.9688280389827452	0	0.8261233709258723	0	0.5	0.6850648761683639	ENOG411CZNX	339792783, Xelaev18004440m.g, Xelaev18006750m.g, Xelaev18010030m.g	GenBank, Xenbase_9.1	Xelaev18004440m.g, klf4.L, klf4.S	Kruppel-like factor 4 [Xenopus laevis], NA	O43474	KLF4	EZF GKLF	Kruppel-like factor 4 (Gut)	0.2466514915774212	0.6902835759681109	FALSE	FALSE	FALSE
ENOG411CQYU	0	0	0	1	0	0.9688280389827452	0	0.8261233709258723	0	0.5	0.6850648761683639	ENOG411CQYU	114107960, Xelaev18045073m.g, Xelaev18047447m.g	GenBank, Xenbase_9.1	dhrs7b.L, dhrs7b.S	MGC154832 protein [Xenopus laevis], NA	Q6IAN0	DHRS7B	SDR32C1	dehydrogenase reductase SDR family member 7B	0.2466514915774212	0.6902835759681109	FALSE	FALSE	FALSE
ENOG411CPF1	0	0	0	1	0	0.9688280389827452	0	0.8261233709258723	0	0.5	0.6850648761683639	ENOG411CPF1	114108327, Xelaev18016957m.g	GenBank, Xenbase_9.1	ddx46.L	LOC779079 protein [Xenopus laevis], NA	Q7L014	DDX46	KIAA0801	DEAD (Asp-Glu-Ala-Asp) box polypeptide 46	0.2466514915774212	0.6902835759681109	FALSE	FALSE	FALSE
ENOG411CVU3	0	0	0	1	0	0.9688280389827452	0	0.8261233709258723	0	0.5	0.6850648761683639	ENOG411CVU3	104089, 120537942, 120577670, 214296, 226349, 33416699, 47506948, 47937673, 47937704, 49115624, 49119513, 50417528, 51703955, 54035132, 64828, 66911523, 763031, 85805, Xelaev18007079m.g, Xelaev18007075m.g	GenBank, Xenbase_9.1	loc548369.L, loc100135349.L	Ig heavy chain precursor - African clawed frog (fragment), Unknown (protein for IMAGE:8531379) [Xenopus laevis], LOC398774 protein [Xenopus laevis], Ig mu-chain VJC-region [Xenopus laevis], Ig CH II, MGC69066 protein [Xenopus laevis], Unknown (protein for MGC:82411) [Xenopus laevis], Unknown (protein for MGC:82540) [Xenopus laevis], Unknown (protein for MGC:85402) [Xenopus laevis], Ig heavy chain…	P01871	IGHM	NA	immunoglobulin heavy constant	0.2466514915774212	0.6902835759681109	FALSE	FALSE	FALSE
ENOG411CUDV	0	0	0	1	0	0.9688280389827452	0	0.8261233709258723	0	0.5	0.6850648761683639	ENOG411CUDV	Xelaev18031244m.g	Xenbase_9.1	avl9.L	NA	Q8NBF6	AVL9	KIAA0241	AVL9 homolog (S. cerevisiase)	0.2466514915774212	0.6902835759681109	FALSE	FALSE	FALSE
ENOG411CZU6	0	0	0	1	0	0.9688280389827452	0	0.8261233709258723	0	0.5	0.6850648761683639	ENOG411CZU6	148231645, Xelaev18027324m.g	GenBank, Xenbase_9.1	ndufaf4.L	NADH dehydrogenase (ubiquinone) 1 alpha subcomplex, assembly factor 4 [Xenopus laevis], NA	Q9P032	NDUFAF4	C6orf66 HRPAP20	NADH dehydrogenase (ubiquinone) complex I, assembly factor 4	0.2466514915774212	0.6902835759681109	FALSE	FALSE	FALSE
ENOG411CW9G	0	0	0	1	0	0.9688280389827452	0	0.8261233709258723	0	0.5	0.6850648761683639	ENOG411CW9G	Xelaev18015066m.g, Xelaev18012108m.g, Xelaev18002431m.g, Xelaev18002447m.g, Xelaev18026803m.g, Xelaev18029045m.g	Xenbase_9.1	Xelaev18015066m.g, Xelaev18012108m.g, Xelaev18002431m.g, Xelaev18002447m.g, arid1b.L, arid1b.S	NA	Q8NFD5	ARID1B	BAF250B DAN15 KIAA1235 OSA2	At rich interactive domain	0.2466514915774212	0.6902835759681109	FALSE	FALSE	FALSE
ENOG411CY4D	0	0	0	1	0	0.9688280389827452	0	0.8261233709258723	0	0.5	0.6850648761683639	ENOG411CY4D	Xelaev18025753m.g, Xelaev18023797m.g	Xenbase_9.1	bsn.S, bsn.L	NA	Q9UPA5	BSN	KIAA0434 ZNF231	bassoon (presynaptic cytomatrix protein)	0.2466514915774212	0.6902835759681109	FALSE	FALSE	FALSE
ENOG411CV7A	0	0	0	1	0	0.9688280389827452	0	0.8261233709258723	0	0.5	0.6850648761683639	ENOG411CV7A	Xelaev18029057m.g	Xenbase_9.1	cog2.S	NA	Q14746	COG2	LDLC	Component of oligomeric golgi complex 2	0.2466514915774212	0.6902835759681109	FALSE	FALSE	FALSE
ENOG411CWKS	0	0	0	1	0	0.9688280389827452	0	0.8261233709258723	0	0.5	0.6850648761683639	ENOG411CWKS	130774478, Xelaev18015253m.g, Xelaev18012573m.g	GenBank, Xenbase_9.1	kdm1a.S, kdm1a.L	LSD1 [Xenopus laevis], NA	O60341	KDM1A	AOF2 KDM1 KIAA0601 LSD1	Lysine (K)-specific demethylase 1A	0.2466514915774212	0.6902835759681109	FALSE	FALSE	FALSE
ENOG411CSM2	0	0	0	1	0	0.9688280389827452	0	0.8261233709258723	0	0.5	0.6850648761683639	ENOG411CSM2	147905083, Xelaev18002013m.g	GenBank, Xenbase_9.1	enoph1.S	enolase-phosphatase E1 [Xenopus laevis], NA	Q9UHY7	ENOPH1	MASA	enolase-phosphatase 1	0.2466514915774212	0.6902835759681109	FALSE	FALSE	FALSE
ENOG411CYCB	0	0	0	1	0	0.9688280389827452	0	0.8261233709258723	0	0.5	0.6850648761683639	ENOG411CYCB	148237633, Xelaev18017900m.g, Xelaev18020877m.g	GenBank, Xenbase_9.1	nrf1.L, nrf1.S	nuclear respiratory factor 1 [Xenopus laevis], NA	Q16656	NRF1	NA	nuclear respiratory factor 1	0.2466514915774212	0.6902835759681109	FALSE	FALSE	FALSE
ENOG411CRX6	0	0	0	1	0	0.9688280389827452	0	0.8261233709258723	0	0.5	0.6850648761683639	ENOG411CRX6	148236643, Xelaev18036105m.g	GenBank, Xenbase_9.1	pih1d1.L	PIH1 domain-containing protein 1 [Xenopus laevis], NA	Q9NWS0	PIH1D1	NOP17	PIH1 domain containing 1	0.2466514915774212	0.6902835759681109	FALSE	FALSE	FALSE
ENOG411CZ44	0	0	0	1	0	0.9688280389827452	0	0.8261233709258723	0	0.5	0.6850648761683639	ENOG411CZ44	161611780, 27503853, 28302342, Xelaev18047855m.g, Xelaev18045639m.g	GenBank, Xenbase_9.1	rnf40.S, rnf40.L	LOC100127292 protein [Xenopus laevis], LOC398536 protein [Xenopus laevis], LOC398495 protein [Xenopus laevis], NA	Q5VTR2	RNF20	BRE1A	E3 ubiquitin- protein ligase	0.2466514915774212	0.6902835759681109	FALSE	FALSE	FALSE
ENOG411CWB5	0	0	0	1	0	0.9688280389827452	0	0.8261233709258723	0	0.5	0.6850648761683639	ENOG411CWB5	Xelaev18035440m.g, Xelaev18037404m.g	Xenbase_9.1	tmprss4.L, tmprss4.S	NA	Q9NRS4	TMPRSS4	TMPRSS3	transmembrane protease, serine 4	0.2466514915774212	0.6902835759681109	FALSE	FALSE	FALSE
ENOG411CQQJ	0	0	0	1	0	0.9688280389827452	0	0.8261233709258723	0	0.5	0.6850648761683639	ENOG411CQQJ	161611746, Xelaev18029869m.g, Xelaev18027802m.g	GenBank, Xenbase_9.1	wdr33.S, wdr33.L	LOC100127314 protein [Xenopus laevis], NA	Q9C0J8	WDR33	WDC146	WD repeat domain 33	0.2466514915774212	0.6902835759681109	FALSE	FALSE	FALSE
ENOG411CP70	0	0	0	1	0	0.9688280389827452	0	0.8261233709258723	0	0.5	0.6850648761683639	ENOG411CP70	Xelaev18024880m.g, Xelaev18033580m.g, Xelaev18031822m.g, Xelaev18004709m.g	Xenbase_9.1	spire2.S, spire1.S, spire1.L, spire2.L	NA	Q08AE8, Q8WWL2	SPIRE1, SPIRE2	KIAA1135 SPIR1, KIAA1832 SPIR2	spire homolog	0.2466514915774212	0.6902835759681109	FALSE	FALSE	FALSE
ENOG411CR6E	0	0	0	1	0	0.9688280389827452	0	0.8261233709258723	0	0.5	0.6850648761683639	ENOG411CR6E	148223748, Xelaev18020833m.g	GenBank, Xenbase_9.1	ube2q2.S	ubiquitin-conjugating enzyme E2Q family member 2 [Xenopus laevis], NA	Q7Z7E8, Q8WVN8	UBE2Q1, UBE2Q2	NICE5 UBE2Q, NA	Ubiquitin-conjugating enzyme E2Q family member	0.2466514915774212	0.6902835759681109	FALSE	FALSE	FALSE
ENOG411CXP0	0	0	0	1	0	0.9688280389827452	0	0.8261233709258723	0	0.5	0.6850648761683639	ENOG411CXP0	148231899	GenBank	NA	pre-mRNA-splicing factor RBM22 [Xenopus laevis]	Q9NW64	RBM22	ZC3H16	RNA binding motif protein 22	0.2466514915774212	0.6902835759681109	FALSE	FALSE	FALSE
ENOG411CQXG	0	0	0	1	0	0.9688280389827452	0	0.8261233709258723	0	0.5	0.6850648761683639	ENOG411CQXG	115527881, 49256283, 62471477, Xelaev18044471m.g, Xelaev18031198m.g	GenBank, Xenbase_9.1	glb1.L, glb1l.L	LOC100158367 protein [Xenopus laevis], LOC443705 protein [Xenopus laevis], NA	P16278, Q6UWU2	GLB1, GLB1L	ELNR1, NA	galactosidase, beta	0.2466514915774212	0.6902835759681109	FALSE	FALSE	FALSE
ENOG411CSNJ	0	0	0	1	0	0.9688280389827452	0	0.8261233709258723	0	0.5	0.6850648761683639	ENOG411CSNJ	148226563, 148228074, Xelaev18017548m.g, Xelaev18022031m.g	GenBank, Xenbase_9.1	rab3ip.L, rab3il1.L	RAB3A interacting protein (rabin3) [Xenopus laevis], NA	Q8TBN0, Q96QF0, H3BNG1	RAB3IL1, RAB3IP, NA	NA, RABIN8	RAB3A interacting protein	0.2466514915774212	0.6902835759681109	FALSE	FALSE	FALSE
ENOG411CZUH	0	0	0	1	0	0.9688280389827452	0	0.8261233709258723	0	0.5	0.6850648761683639	ENOG411CZUH	Xelaev18030568m.g	Xenbase_9.1	als2cl.L	NA	Q60I27	ALS2CL	NA	ALS2 C-terminal like	0.2466514915774212	0.6902835759681109	FALSE	FALSE	FALSE
ENOG411CWQZ	0	0	0	1	0	0.9688280389827452	0	0.8261233709258723	0	0.5	0.6850648761683639	ENOG411CWQZ	108860915, 147901466, 147906210, 157881381, Xelaev18029074m.g	GenBank, Xenbase_9.1	qki.S	RecName: Full=Protein quaking-A; Short=Xqua, protein quaking-B [Xenopus laevis], protein quaking-A [Xenopus laevis], Chain A, Solution Structure Of The Kh-Qua2 Region Of The Xenopus Star-Gsg Quaking Protein., NA	Q96PU8	QKI	HKQ	QKI, KH domain containing, RNA binding	0.2466514915774212	0.6902835759681109	FALSE	FALSE	FALSE
ENOG411DEZJ	0	0	0	1	0	0.9688280389827452	0	0.8261233709258723	0	0.5	0.6850648761683639	ENOG411DEZJ	214547, Xelaev18047171m.g, Xelaev18044700m.g, Xelaev18015846m.g, Xelaev18013342m.g	GenBank, Xenbase_9.1	itga6.S, itga6.L, itga7.S, itga7.L	integrin alpha 6 subunit [Xenopus laevis], NA	NA	NA	NA	Integrin, alpha	0.2466514915774212	0.6902835759681109	FALSE	FALSE	FALSE
ENOG411DGDF	0	0	0	1	0	0.9688280389827452	0	0.8261233709258723	0	0.5	0.6850648761683639	ENOG411DGDF	58399472, Xelaev18011060m.g, Xelaev18008413m.g	GenBank, Xenbase_9.1	atp8b1.S, atp8b1.L	LOC733158 protein [Xenopus laevis], NA	NA	NA	NA	ATPase, aminophospholipid transporter, class I, type 8B, member 1	0.2466514915774212	0.6902835759681109	FALSE	FALSE	FALSE
ENOG411CQ57	0	0	0	1	0	0.9688280389827452	0	0.8261233709258723	0	0.5	0.6850648761683639	ENOG411CQ57	Xelaev18012946m.g, Xelaev18012945m.g, Xelaev18015511m.g	Xenbase_9.1	None	NA	Q9HB29, P14778	IL1RL2, IL1R1	IL1RRP2, IL1R IL1RA IL1RT1	Interleukin 1	0.2466514915774212	0.6902835759681109	FALSE	FALSE	FALSE
ENOG411CZ8Z	0	0	0	1	0	0.9688280389827452	0	0.8261233709258723	0	0.5	0.6850648761683639	ENOG411CZ8Z	57920950	GenBank	NA	LOC733149 protein [Xenopus laevis]	Q96IZ6, Q6P1Q9	METTL2A, METTL2B	METTL2, NA	Methyltransferase like	0.2466514915774212	0.6902835759681109	FALSE	FALSE	FALSE
ENOG411CYN0	0	0	0	1	0	0.9688280389827452	0	0.8261233709258723	0	0.5	0.6850648761683639	ENOG411CYN0	224487992, 49119128, Xelaev18023493m.g, Xelaev18025520m.g	GenBank, Xenbase_9.1	edem3.L, edem3.S	RecName: Full=ER degradation-enhancing alpha-mannosidase-like 3; Flags: Precursor, MGC80179 protein [Xenopus laevis], NA	Q9BZQ6	EDEM3	C1orf22	ER degradation enhancer, mannosidase alpha-like 3	0.2466514915774212	0.6902835759681109	FALSE	FALSE	FALSE
ENOG411CQ4Z	0	0	0	1	0	0.9688280389827452	0	0.8261233709258723	0	0.5	0.6850648761683639	ENOG411CQ4Z	161611760, Xelaev18015205m.g, Xelaev18012531m.g	GenBank, Xenbase_9.1	mrps15.S, mrps15.L	LOC100127328 protein [Xenopus laevis], NA	P82914	MRPS15	RPMS15	mitochondrial ribosomal protein S15	0.2466514915774212	0.6902835759681109	FALSE	FALSE	FALSE
ENOG411CVPS	0	0	0	1	0	0.9688280389827452	0	0.8261233709258723	0	0.5	0.6850648761683639	ENOG411CVPS	148230735, 76150384, Xelaev18027227m.g	GenBank, Xenbase_9.1	atg5.L	ATG5 autophagy related 5 homolog [Xenopus laevis], autophagy protein 5 [Xenopus laevis], NA	Q9H1Y0	ATG5	APG5L ASP	autophagy related 5	0.2466514915774212	0.6902835759681109	FALSE	FALSE	FALSE
ENOG411D0RU	0	0	0	1	0	0.9688280389827452	0	0.8261233709258723	0	0.5	0.6850648761683639	ENOG411D0RU	Xelaev18042334m.g, Xelaev18039026m.g	Xenbase_9.1	tmtops.S, tmtops.L	NA	NA	NA	NA	K04256 c-opsin	0.2466514915774212	0.6902835759681109	FALSE	FALSE	FALSE
ENOG411CVNX	0	0	0	1	0	0.9688280389827452	0	0.8261233709258723	0	0.5	0.6850648761683639	ENOG411CVNX	148231847	GenBank	NA	GPN-loop GTPase 3 [Xenopus laevis]	Q9UHW5	GPN3	ATPBD1C	GPN-loop GTPase 3	0.2466514915774212	0.6902835759681109	FALSE	FALSE	FALSE
ENOG411CSKY	0	0	0	1	0	0.9688280389827452	0	0.8261233709258723	0	0.5	0.6850648761683639	ENOG411CSKY	148222866, 300086, 47682860, Xelaev18038724m.g, Xelaev18041965m.g	GenBank, Xenbase_9.1	Xelaev18038724m.g, Xelaev18041965m.g	chromosome-associated kinesin KIF4 [Xenopus laevis], Klp=kinesin-like protein {clone XKLp1} [Xenopus laevis, oocytes, Peptide Partial, 330 aa], Kif4a-A-prov protein [Xenopus laevis], NA	O95239, Q2VIQ3	KIF4A, KIF4B	KIF4, NA	Kinesin family member 4A	0.2466514915774212	0.6902835759681109	FALSE	FALSE	FALSE
ENOG411CRKT	0	0	0	1	0	0.9688280389827452	0	0.8261233709258723	0	0.5	0.6850648761683639	ENOG411CRKT	115528223, 118835659, 147906514, 147907036, 148237655, 157422986, Xelaev18044406m.g, Xelaev18044512m.g, Xelaev18044508m.g, Xelaev18013467m.g, Xelaev18044510m.g, Xelaev18046959m.g, Xelaev18044507m.g, Xelaev18044405m.g, Xelaev18015957m.g, Xelaev18047044m.g	GenBank, Xenbase_9.1	cyp27c1.L, Xelaev18044512m.g, loc100496109.L, cyp27b1.L, Xelaev18044510m.g, cyp27c1.S, loc100145331.L, Xelaev18044405m.g, cyp27b1.S, cyp27b1-like.1.S	LOC733412 protein [Xenopus laevis], Unknown (protein for IMAGE:8532588) [Xenopus laevis], MGC86179 protein [Xenopus laevis], sterol 26-hydroxylase, mitochondrial [Xenopus laevis], uncharacterized protein LOC735141 [Xenopus laevis], NA	O15528, Q02318, Q4G0S4	CYP27B1, CYP27A1, CYP27C1	CYP1ALPHA CYP27B, CYP27, NA	Cytochrome P450 family 27 subfamily	0.2466514915774212	0.6902835759681109	FALSE	FALSE	FALSE
ENOG411CZ65	0	0	0	1	0	0.9688280389827452	0	0.8261233709258723	0	0.5	0.6850648761683639	ENOG411CZ65	Xelaev18011449m.g	Xenbase_9.1	hlcs.L	NA	P50747	HLCS	NA	holocarboxylase synthetase (biotin-(proprionyl-CoA-carboxylase (ATP-hydrolysing)) ligase)	0.2466514915774212	0.6902835759681109	FALSE	FALSE	FALSE
ENOG411CRW8	0	0	0	1	0	0.9688280389827452	0	0.8261233709258723	0	0.5	0.6850648761683639	ENOG411CRW8	Xelaev18037817m.g, Xelaev18036092m.g, Xelaev18016617m.g	Xenbase_9.1	loc100495072.S, loc105947855.L, loc100486664.L	NA	Q8N6L0	CCDC155	KASH5	Coiled-coil domain containing 155	0.2466514915774212	0.6902835759681109	FALSE	FALSE	FALSE
ENOG411CRD9	0	0	0	1	0	0.9688280389827452	0	0.8261233709258723	0	0.5	0.6850648761683639	ENOG411CRD9	Xelaev18035597m.g, Xelaev18037486m.g	Xenbase_9.1	pank4.L, pank4.S	NA	Q9NVE7	PANK4	NA	Pantothenate kinase 4	0.2466514915774212	0.6902835759681109	FALSE	FALSE	FALSE
ENOG411CSAI	0	0	0	1	0	0.9688280389827452	0	0.8261233709258723	0	0.5	0.6850648761683639	ENOG411CSAI	Xelaev18012724m.g, Xelaev18015342m.g, Xelaev18010533m.g, Xelaev18007689m.g	Xenbase_9.1	ppm1e.L, ppm1e.S, ppm1f.S, ppm1f.L	NA	P49593, Q8WY54	PPM1F, PPM1E	KIAA0015 POPX2, CAMKN KIAA1072 POPX1	protein phosphatase, Mg2 Mn2 dependent	0.2466514915774212	0.6902835759681109	FALSE	FALSE	FALSE
ENOG411CZ9R	0	0	0	1	0	0.9688280389827452	0	0.8261233709258723	0	0.5	0.6850648761683639	ENOG411CZ9R	148230479, Xelaev18015136m.g, Xelaev18012023m.g	GenBank, Xenbase_9.1	trappc3.S, trappc3.L	trafficking protein particle complex 3 [Xenopus laevis], NA	O43617	TRAPPC3	BET3	Trafficking protein particle complex 3	0.2466514915774212	0.6902835759681109	FALSE	FALSE	FALSE
ENOG411CZV1	0	0	0	1	0	0.9688280389827452	0	0.8261233709258723	0	0.5	0.6850648761683639	ENOG411CZV1	148223633, Xelaev18017237m.g	GenBank, Xenbase_9.1	ergic1.L	endoplasmic reticulum-Golgi intermediate compartment protein 1 [Xenopus laevis], NA	Q969X5	ERGIC1	ERGIC32 KIAA1181	Endoplasmic reticulum-golgi intermediate compartment (ERGIC) 1	0.2466514915774212	0.6902835759681109	FALSE	FALSE	FALSE
ENOG411CR1I	0	0	0	1	0	0.9688280389827452	0	0.8261233709258723	0	0.5	0.6850648761683639	ENOG411CR1I	147900117, 147904951, 147905424, 47939811, 49118800, Xelaev18035210m.g, Xelaev18016308m.g, Xelaev18007413m.g, Xelaev18006499m.g, Xelaev18031743m.g, Xelaev18033545m.g, Xelaev18016967m.g, Xelaev18035980m.g, Xelaev18022632m.g, Xelaev18012460m.g, Xelaev18010701m.g, Xelaev18002668m.g, Xelaev18015992m.g, Xelaev18035989m.g, Xelaev18015762m.g, Xelaev18035901m.g, Xelaev18016320m.g, Xelaev18037107m.g, Xela…	GenBank, Xenbase_9.1	Xelaev18035210m.g, Xelaev18016308m.g, Xelaev18007413m.g, Xelaev18006499m.g, Xelaev18031743m.g, Xelaev18033545m.g, Xetrov90007305m.L, Xelaev18035980m.g, Xelaev18022632m.g, Xelaev18012460m.g, Xelaev18010701m.g, Xelaev18002668m.g, Xelaev18015992m.g, loc101733330.L, Xelaev18015762m.g, Xelaev18035901m.g, Xelaev18016320m.g, Xelaev18037107m.g, Xelaev18024213m.g, Xelaev18001202m.g, Xelaev18004024m.g, Xel…	hypothetical protein LOC734925 [Xenopus laevis], TRAF2 and NCK interacting kinase [Xenopus laevis], misshapen-like kinase 1 [Xenopus laevis], LOC432186 protein [Xenopus laevis], LOC443633 protein [Xenopus laevis], NA	Q9UKE5, Q8N4C8	TNIK, MINK1	KIAA0551, B55 MAP4K6 MINK YSK2 ZC3	mitogen-activated protein kinase kinase kinase kinase	0.2466514915774212	0.6902835759681109	FALSE	FALSE	FALSE
ENOG411CZ9K	0	0	0	1	0	0.9688280389827452	0	0.8261233709258723	0	0.5	0.6850648761683639	ENOG411CZ9K	Xelaev18040020m.g	Xenbase_9.1	nubpl.L	NA	Q8TB37	NUBPL	C14orf127	nucleotide binding protein-like	0.2466514915774212	0.6902835759681109	FALSE	FALSE	FALSE
ENOG411CTE8	0	0	0	1	0	0.9688280389827452	0	0.8261233709258723	0	0.5	0.6850648761683639	ENOG411CTE8	148236233, Xelaev18031165m.g, Xelaev18033222m.g	GenBank, Xenbase_9.1	exosc7.L, exosc7.S	exosome component 7 [Xenopus laevis], NA	Q15024	EXOSC7	KIAA0116 RRP42	exosome component 7	0.2466514915774212	0.6902835759681109	FALSE	FALSE	FALSE
ENOG411CZF7	0	0	0	1	0	0.9688280389827452	0	0.8261233709258723	0	0.5	0.6850648761683639	ENOG411CZF7	Xelaev18027195m.g	Xenbase_9.1	fig4.L	NA	Q92562	FIG4	KIAA0274 SAC3	FIG4 homolog, SAC1 lipid phosphatase domain containing (S. cerevisiae)	0.2466514915774212	0.6902835759681109	FALSE	FALSE	FALSE
ENOG411CPG3	0	0	0	1	0	0.9688280389827452	0	0.8261233709258723	0	0.5	0.6850648761683639	ENOG411CPG3	189442675	GenBank	NA	LOC100174798 protein [Xenopus laevis]	Q6NUQ1	RINT1	NA	RAD50 interactor 1	0.2466514915774212	0.6902835759681109	FALSE	FALSE	FALSE
ENOG411CSRP	0	0	0	1	0	0.9688280389827452	0	0.8261233709258723	0	0.5	0.6850648761683639	ENOG411CSRP	148233487, 148236462, Xelaev18023224m.g, Xelaev18041852m.g, Xelaev18038418m.g, Xelaev18025305m.g	GenBank, Xenbase_9.1	rabgap1l.L, rabgap1.S, rabgap1.L, rabgap1l.S	RAB GTPase activating protein 1-like [Xenopus laevis], uncharacterized protein LOC379167 [Xenopus laevis], NA	Q9Y3P9, Q5R372	RABGAP1, RABGAP1L	NA, HHL KIAA0471	RAB GTPase activating protein	0.2466514915774212	0.6902835759681109	FALSE	FALSE	FALSE
ENOG411CT03	0	0	0	1	0	0.9688280389827452	0	0.8261233709258723	0	0.5	0.6850648761683639	ENOG411CT03	Xelaev18034602m.g	Xenbase_9.1	btaf1-like.1.L	NA	O14981	BTAF1	TAF172	BTAF1 RNA polymerase II, B-TFIID transcription factor-associated, 170kDa (Mot1 homolog, S. cerevisiae)	0.2466514915774212	0.6902835759681109	FALSE	FALSE	FALSE
ENOG411CQYY	0	0	0	1	0	0.9688280389827452	0	0.8261233709258723	0	0.5	0.6850648761683639	ENOG411CQYY	148234923, 27735471, Xelaev18029392m.g	GenBank, Xenbase_9.1	orc3.S	origin recognition complex, subunit 3 [Xenopus laevis], Orc3l protein [Xenopus laevis], NA	Q9UBD5	ORC3	LATHEO ORC3L	Origin recognition complex, subunit 3	0.2466514915774212	0.6902835759681109	FALSE	FALSE	FALSE
ENOG411CWGQ	0	0	0	1	0	0.9688280389827452	0	0.8261233709258723	0	0.5	0.6850648761683639	ENOG411CWGQ	Xelaev18007527m.g, Xelaev18010437m.g	Xenbase_9.1	ttc28-like.L, ttc28-like.S	NA	Q96AY4	TTC28	KIAA1043 TPRBK	tetratricopeptide repeat domain 28	0.2466514915774212	0.6902835759681109	FALSE	FALSE	FALSE
ENOG411CRHK	0	0	0	1	0	0.9688280389827452	0	0.8261233709258723	0	0.5	0.6850648761683639	ENOG411CRHK	148231149, 148236605, Xelaev18029624m.g, Xelaev18011777m.g, Xelaev18014512m.g	GenBank, Xenbase_9.1	pcyt1a.S, pcyt1b-like.L, pcyt1b-like.S	phosphate cytidylyltransferase 1, choline, alpha isoform [Xenopus laevis], phosphate cytidylyltransferase 1, choline, alpha [Xenopus laevis], NA	P49585, Q9Y5K3	PCYT1A, PCYT1B	CTPCT PCYT1, CCTB	Phosphate cytidylyltransferase 1, choline	0.2466514915774212	0.6902835759681109	FALSE	FALSE	FALSE
ENOG411CUS2	0	0	0	1	0	0.9688280389827452	0	0.8261233709258723	0	0.5	0.6850648761683639	ENOG411CUS2	13122446, 14030433, 147903399, Xelaev18026558m.g	GenBank, Xenbase_9.1	bub1.L	protein kinase Bub1 [Xenopus laevis], spindle checkpoint protein Bub1 [Xenopus laevis], BUB1 budding uninhibited by benzimidazoles 1 homolog [Xenopus laevis], NA	O43683	BUB1	BUB1L	Budding uninhibited by benzimidazoles 1 homolog	0.2466514915774212	0.6902835759681109	FALSE	FALSE	FALSE
ENOG411CY8W	0	0	0	1	0	0.9688280389827452	0	0.8261233709258723	0	0.5	0.6850648761683639	ENOG411CY8W	117558237, 147901335	GenBank	NA	LOC100036797 protein [Xenopus laevis], zinc finger CCCH-type containing 10 [Xenopus laevis]	Q96K80	ZC3H10	ZC3HDC10	Zinc finger CCCH-type containing 10	0.2466514915774212	0.6902835759681109	FALSE	FALSE	FALSE
ENOG411CQDS	0	0	0	1	0	0.9688280389827452	0	0.8261233709258723	0	0.5	0.6850648761683639	ENOG411CQDS	32442466, Xelaev18012544m.g, Xelaev18015216m.g, Xelaev18027374m.g, Xelaev18029483m.g	GenBank, Xenbase_9.1	khdrbs1.L, khdrbs1.S, khdrbs2.L, khdrbs2.S	KH domain RNA-binding protein Sam68 [Xenopus laevis], NA	Q07666, Q5VWX1	KHDRBS1, KHDRBS2	SAM68, SLM1	KH domain containing, RNA binding, signal transduction associated	0.2466514915774212	0.6902835759681109	FALSE	FALSE	FALSE
ENOG411CTZK	0	0	0	1	0	0.9688280389827452	0	0.8261233709258723	0	0.5	0.6850648761683639	ENOG411CTZK	Xelaev18021733m.g, Xelaev18019777m.g	Xenbase_9.1	loc100498229-like.L, loc100498229-like.S	NA	Q9NQ32	C11orf16	NA	Chromosome 11 open reading frame 16	0.2466514915774212	0.6902835759681109	FALSE	FALSE	FALSE
ENOG411CV50	0	0	0	1	0	0.9688280389827452	0	0.8261233709258723	0	0.5	0.6850648761683639	ENOG411CV50	Xelaev18018452m.g	Xenbase_9.1	lctl.L	NA	Q6UWM7	LCTL	KLPH	Lactase-like	0.2466514915774212	0.6902835759681109	FALSE	FALSE	FALSE
ENOG411CV6R	0	0	0	1	0	0.9688280389827452	0	0.8261233709258723	0	0.5	0.6850648761683639	ENOG411CV6R	Xelaev18023514m.g	Xenbase_9.1	ttc26.L	NA	A0AVF1	TTC26	IFT56	tetratricopeptide repeat domain 26	0.2466514915774212	0.6902835759681109	FALSE	FALSE	FALSE
ENOG411D3FX	0	0	0	1	0	0.9688280389827452	0	0.8261233709258723	0	0.5	0.6850648761683639	ENOG411D3FX	Xelaev18041218m.g, Xelaev18039659m.g	Xenbase_9.1	None	NA	Q8NDC0	MAPK1IP1L	C14orf32	Mitogen-activated protein kinase 1 interacting protein 1-like	0.2466514915774212	0.6902835759681109	FALSE	FALSE	FALSE
ENOG411CQRK	0	0	0	1	0	0.9688280389827452	0	0.8261233709258723	0	0.5	0.6850648761683639	ENOG411CQRK	46250145, Xelaev18002190m.g, Xelaev18002187m.g	GenBank, Xenbase_9.1	Xelaev18002190m.g, nmral1.S	LOC414512 protein [Xenopus laevis], NA	Q9HBL8	NMRAL1	HSCARG	NmrA-like family domain containing 1	0.2466514915774212	0.6902835759681109	FALSE	FALSE	FALSE
ENOG411CRCD	0	0	0	1	0	0.9688280389827452	0	0.8261233709258723	0	0.5	0.6850648761683639	ENOG411CRCD	148233574, Xelaev18008460m.g, Xelaev18008462m.g, Xelaev18008459m.g, Xelaev18011104m.g	GenBank, Xenbase_9.1	Xelaev18008460m.g, Xetrov90003785m.L, Xelaev18008459m.g, Xelaev18011104m.g	dymeclin [Xenopus laevis], NA	Q7RTS9	DYM	NA	dymeclin	0.2466514915774212	0.6902835759681109	FALSE	FALSE	FALSE
ENOG411CZT4	0	0	0	1	0	0.9688280389827452	0	0.8261233709258723	0	0.5	0.6850648761683639	ENOG411CZT4	147906661, Xelaev18014936m.g	GenBank, Xenbase_9.1	myo19.S	myosin-XIX [Xenopus laevis], NA	Q96H55	MYO19	MYOHD1	Myosin XIX	0.2466514915774212	0.6902835759681109	FALSE	FALSE	FALSE
ENOG411D4FM	0	0	0	1	0	0.9688280389827452	0	0.8261233709258723	0	0.5	0.6850648761683639	ENOG411D4FM	Xelaev18038948m.g	Xenbase_9.1	loc101735011.L	NA	NA	NA	NA	IGc1	0.2466514915774212	0.6902835759681109	FALSE	FALSE	FALSE
Xelaev18037251m.g	0	0	0	1	0	0.9688280389827452	0	0.8261233709258723	0	0.5	0.6850648761683639	Xelaev18037251m.g	NA	Xenbase_9.1	Xelaev18037251m.g	NA	NA	NA	NA	NA	0.2466514915774212	0.6902835759681109	FALSE	FALSE	FALSE
ENOG411D0UC	0	0	0	1	0	0.9688280389827452	0	0.8261233709258723	0	0.5	0.6850648761683639	ENOG411D0UC	215400618, Xelaev18038137m.g	GenBank, Xenbase_9.1	anapc2.L	anaphase-promoting complex subunit 2 [Xenopus laevis], NA	Q9UJX6	ANAPC2	APC2 KIAA1406	anaphase promoting complex subunit 2	0.2466514915774212	0.6902835759681109	FALSE	FALSE	FALSE
ENOG411CZMJ	0	0	0	1	0	0.9688280389827452	0	0.8261233709258723	0	0.5	0.6850648761683639	ENOG411CZMJ	Xelaev18037505m.g, Xelaev18035653m.g	Xenbase_9.1	cpsf3l.S, cpsf3l.L	NA	Q5TA45	INTS11	CPSF3L RC68	cleavage and polyadenylation specific factor 3-like	0.2466514915774212	0.6902835759681109	FALSE	FALSE	FALSE
ENOG411CR9C	0	0	0	1	0	0.9688280389827452	0	0.8261233709258723	0	0.5	0.6850648761683639	ENOG411CR9C	147906695, 148223681, 148230164, 66910795, Xelaev18017295m.g, Xelaev18018874m.g, Xelaev18020126m.g, Xelaev18036679m.g, Xelaev18008888m.g, Xelaev18034302m.g	GenBank, Xenbase_9.1	grk6-like.L, grk5.L, grk5.S, loc100497344-like.S, grk4.S, loc100497344-like.L	G protein-coupled receptor kinase 4 [Xenopus laevis], G protein-coupled receptor kinase 6 [Xenopus laevis], LOC733256 protein [Xenopus laevis], NA	P34947, P32298, P43250	GRK5, GRK4, GRK6	GPRK5, GPRK2L GPRK4, GPRK6	G protein-coupled receptor kinase	0.2466514915774212	0.6902835759681109	FALSE	FALSE	FALSE
ENOG411CSZ0	0	0	0	1	0	0.9688280389827452	0	0.8261233709258723	0	0.5	0.6850648761683639	ENOG411CSZ0	147903723, 49114816, Xelaev18013920m.g, Xelaev18016532m.g	GenBank, Xenbase_9.1	numa1.L, numa1.S	nuclear/mitotic apparatus protein [Xenopus laevis], LOC443581 protein [Xenopus laevis], NA	Q14980	NUMA1	NMP22 NUMA	nuclear mitotic apparatus protein 1	0.2466514915774212	0.6902835759681109	FALSE	FALSE	FALSE
ENOG411CY19	0	0	0	1	0	0.9688280389827452	0	0.8261233709258723	0	0.5	0.6850648761683639	ENOG411CY19	51704037, 80477224, Xelaev18039879m.g	GenBank, Xenbase_9.1	cdan1.L	LOC446932 protein [Xenopus laevis], NA	Q8IWY9	CDAN1	NA	codanin 1	0.2466514915774212	0.6902835759681109	FALSE	FALSE	FALSE
ENOG411CPAQ	0	0	0	1	0	0.9688280389827452	0	0.8261233709258723	0	0.5	0.6850648761683639	ENOG411CPAQ	147898855, Xelaev18007803m.g	GenBank, Xenbase_9.1	zcchc8.L	zinc finger CCHC domain-containing protein 8 [Xenopus laevis], NA	Q6NZY4	ZCCHC8	NA	Zinc finger, CCHC domain containing 8	0.2466514915774212	0.6902835759681109	FALSE	FALSE	FALSE
ENOG411DGI1	0	0	0	1	0	0.9688280389827452	0	0.8261233709258723	0	0.5	0.6850648761683639	ENOG411DGI1	112797, 50414988, Xelaev18012488m.g, Xelaev18015173m.g	GenBank, Xenbase_9.1	Xelaev18012488m.g, Xelaev18015173m.g	RecName: Full=Cytoskeletal protein 4.1; AltName: Full=Band 4.1, LOC397741 protein [Xenopus laevis], NA	NA	NA	NA	Erythrocyte membrane protein band 4.1 (Elliptocytosis 1, RH-linked)	0.2466514915774212	0.6902835759681109	FALSE	FALSE	FALSE
ENOG411CPCA	0	0	0	1	0	0.9688280389827452	0	0.8261233709258723	0	0.5	0.6850648761683639	ENOG411CPCA	Xelaev18013681m.g, Xelaev18013679m.g, Xelaev18038654m.g	Xenbase_9.1	MGC108450.L, slc25a15.L, loc100495907-like.L	NA	Q9Y619, Q9BXI2	SLC25A15, SLC25A2	ORC1 ORNT1, ORNT2	Solute carrier family 25 (Mitochondrial carrier	0.2466514915774212	0.6902835759681109	FALSE	FALSE	FALSE
ENOG411CR7W	0	0	0	1	0	0.9688280389827452	0	0.8261233709258723	0	0.5	0.6850648761683639	ENOG411CR7W	Xelaev18038748m.g, Xelaev18013761m.g, Xelaev18016210m.g, Xelaev18042057m.g, Xelaev18042054m.g	Xenbase_9.1	Xelaev18038748m.g, rasl11a.L, rasl11a.S, Xelaev18042057m.g, Xelaev18042054m.g	NA	Q6T310	RASL11A	NA	RAS-like family 11 member A	0.2466514915774212	0.6902835759681109	FALSE	FALSE	FALSE
ENOG411DFGP	0	0	0	1	0	0.9688280389827452	0	0.8261233709258723	0	0.5	0.6850648761683639	ENOG411DFGP	209969716, 47937666, 5442412, Xelaev18040773m.g, Xelaev18042881m.g	GenBank, Xenbase_9.1	arhgef2.L, arhgef2.S	Rho/Rac guanine nucleotide exchange factor (GEF) 2 [Xenopus laevis], LOC398353 protein [Xenopus laevis], guanine nucleotide exchange factor LFC [Xenopus laevis], NA	Q92974	ARHGEF2	KIAA0651 LFP40	Rho rac guanine nucleotide exchange factor (GEF) 2	0.2466514915774212	0.6902835759681109	FALSE	FALSE	FALSE
ENOG411CU0Y	0	0	0	1	0	0.9688280389827452	0	0.8261233709258723	0	0.5	0.6850648761683639	ENOG411CU0Y	Xelaev18043549m.g	Xenbase_9.1	nelfcd.L	NA	Q8IXH7	NELFCD	NELFD TH1 TH1L	TH1-like (Drosophila)	0.2466514915774212	0.6902835759681109	FALSE	FALSE	FALSE
ENOG411CSN7	0	0	0	1	0	0.9688280389827452	0	0.8261233709258723	0	0.5	0.6850648761683639	ENOG411CSN7	148230641, 148236974, Xelaev18005686m.g	GenBank, Xenbase_9.1	mad2l1.L	uncharacterized protein LOC414724 [Xenopus laevis], MAD2 mitotic arrest deficient-like 1 [Xenopus laevis], NA	Q13257	MAD2L1	MAD2	MAD2 mitotic arrest deficient-like 1 (Yeast)	0.2466514915774212	0.6902835759681109	FALSE	FALSE	FALSE
ENOG411D13V	0	0	0	1	0	0.9688280389827452	0	0.8261233709258723	0	0.5	0.6850648761683639	ENOG411D13V	Xelaev18032044m.g, Xelaev18033739m.g	Xenbase_9.1	cyp7a1.L, cyp7a1.S	NA	P22680	CYP7A1	CYP7	cytochrome P450, family 7, subfamily A, polypeptide 1	0.2466514915774212	0.6902835759681109	FALSE	FALSE	FALSE
ENOG411CYRU	0	0	0	1	0	0.9688280389827452	0	0.8261233709258723	0	0.5	0.6850648761683639	ENOG411CYRU	Xelaev18005699m.g, Xelaev18040373m.g, Xelaev18018681m.g, Xelaev18025832m.g, Xelaev18011087m.g, Xelaev18008436m.g, Xelaev18023290m.g, Xelaev18018704m.g, Xelaev18018635m.g, Xelaev18024011m.g, Xelaev18024026m.g, Xelaev18018699m.g, Xelaev18024025m.g, Xelaev18015801m.g, Xelaev18025191m.g, Xelaev18018750m.g, Xelaev18015010m.g, Xelaev18023720m.g, Xelaev18024056m.g, Xelaev18018835m.g	Xenbase_9.1	loc100497708.L, loc101731403.L, Xelaev18018681m.g, loc100158544.S, loc100497958.S, loc100497958.L, loc100497424.L, Xelaev18018704m.g, Xelaev18018635m.g, Xelaev18024011m.g, Xelaev18024026m.g, loc101730880.L, Xelaev18024025m.g, Xelaev18015801m.g, loc101730911.S, Xelaev18018750m.g, Xelaev18015010m.g, Xelaev18023720m.g, loc100158544.L, Xelaev18018835m.g	NA	A6PVC2, Q9Y4R7	TTLL8, TTLL3	NA	Tubulin tyrosine ligase-like family, member	0.2466514915774212	0.6902835759681109	FALSE	FALSE	FALSE
ENOG411CUU3	0	0	0	1	0	0.9688280389827452	0	0.8261233709258723	0	0.5	0.6850648761683639	ENOG411CUU3	148224088, Xelaev18037953m.g, Xelaev18036366m.g	GenBank, Xenbase_9.1	ddi2.S, ddi2.L	hypothetical protein LOC379186 [Xenopus laevis], NA	Q8WTU0, Q5TDH0	DDI1, DDI2	NA	DNA-damage inducible 1 homolog 2 (S. cerevisiae)	0.2466514915774212	0.6902835759681109	FALSE	FALSE	FALSE
ENOG411CUY7	0	0	0	1	0	0.9688280389827452	0	0.8261233709258723	0	0.5	0.6850648761683639	ENOG411CUY7	148232636, Xelaev18047528m.g, Xelaev18045208m.g	GenBank, Xenbase_9.1	smg1.S, smg1.L	smg-1 homolog, phosphatidylinositol 3-kinase-related kinase [Xenopus laevis], NA	Q96Q15	SMG1	ATX KIAA0421 LIP	SMG1 homolog, phosphatidylinositol 3-kinase-related kinase (C. elegans)	0.2466514915774212	0.6902835759681109	FALSE	FALSE	FALSE
Xelaev18044758m.g	0	0	0	1	0	0.9688280389827452	0	0.8261233709258723	0	0.5	0.6850648761683639	Xelaev18044758m.g	NA	Xenbase_9.1	Xelaev18044758m.g	NA	NA	NA	NA	NA	0.2466514915774212	0.6902835759681109	FALSE	FALSE	FALSE
ENOG411CXXR	0	0	0	1	0	0.9688280389827452	0	0.8261233709258723	0	0.5	0.6850648761683639	ENOG411CXXR	147902750, 148231305	GenBank	NA	WD repeat domain 5 [Xenopus laevis]	P61964, Q86VZ2	WDR5, WDR5B	BIG3, NA	WD repeat domain	0.2466514915774212	0.6902835759681109	FALSE	FALSE	FALSE
ENOG411CSCZ	0	0	0	1	0	0.9688280389827452	0	0.8261233709258723	0	0.5	0.6850648761683639	ENOG411CSCZ	Xelaev18016375m.g, Xelaev18029654m.g, Xelaev18001034m.g, Xelaev18041970m.g, Xelaev18027514m.g, Xelaev18019541m.g, Xelaev18038673m.g	Xenbase_9.1	dlg2-like.2.S, Xelaev18029654m.g, dlg4.S, Xelaev18041970m.g, Xelaev18027514m.g, dlg4.L, Xelaev18038673m.g	NA	Q12959, Q15700, Q92796	DLG1, DLG2, DLG3	NA, KIAA1232	discs large homolog	0.2466514915774212	0.6902835759681109	FALSE	FALSE	FALSE
ENOG411CQ4R	0	0	0	1	0	0.9688280389827452	0	0.8261233709258723	0	0.5	0.6850648761683639	ENOG411CQ4R	148234277, Xelaev18037097m.g, Xelaev18034837m.g	GenBank, Xenbase_9.1	micu1.S, micu1.L	mitochondrial calcium uptake 1 [Xenopus laevis], NA	Q9BPX6	MICU1	CALC CBARA1	Mitochondrial calcium uptake 1	0.2466514915774212	0.6902835759681109	FALSE	FALSE	FALSE
ENOG411DES1	0	0	0	1	0	0.9688280389827452	0	0.8261233709258723	0	0.5	0.6850648761683639	ENOG411DES1	147900093, 147905558, Xelaev18010349m.g, Xelaev18007411m.g, Xelaev18010355m.g	GenBank, Xenbase_9.1	Xelaev18010349m.g, Xelaev18007411m.g, Xelaev18010355m.g	myotubularin-related protein 3 [Xenopus laevis], myotubularin related protein 3 [Xenopus laevis], NA	NA	NA	NA	Myotubularin related protein 3	0.2466514915774212	0.6902835759681109	FALSE	FALSE	FALSE
ENOG411CYEU	0	0	0	1	0	0.9688280389827452	0	0.8261233709258723	0	0.5	0.6850648761683639	ENOG411CYEU	38014465, Xelaev18034144m.g, Xelaev18032562m.g, Xelaev18032563m.g, Xelaev18000369m.g	GenBank, Xenbase_9.1	cpsf1.S, loc100491532-like.L, cpsf1.L, Xelaev18000369m.g	LOC398931 protein [Xenopus laevis], NA	Q10570	CPSF1	CPSF160	Cleavage and polyadenylation specific factor 1, 160kDa	0.2466514915774212	0.6902835759681109	FALSE	FALSE	FALSE
ENOG411CP8H	0	0	0	1	0	0.9688280389827452	0	0.8261233709258723	0	0.5	0.6850648761683639	ENOG411CP8H	Xelaev18028057m.g, Xelaev18031898m.g, Xelaev18033641m.g, Xelaev18003283m.g, Xelaev18030093m.g	Xenbase_9.1	greb1.L, Xelaev18031898m.g, Xelaev18033641m.g, Xelaev18003283m.g, greb1.S	NA	Q4ZG55, Q9C091	GREB1, GREB1L	KIAA0575, C18orf6 KIAA1772	growth regulation by estrogen in breast	0.2466514915774212	0.6902835759681109	FALSE	FALSE	FALSE
ENOG411CPJU	0	0	0	1	0	0.9688280389827452	0	0.8261233709258723	0	0.5	0.6850648761683639	ENOG411CPJU	147903791, 148227180, Xelaev18017342m.g, Xelaev18021338m.g	GenBank, Xenbase_9.1	cdc23.L, cdc23.S	cell division cycle 23 homolog [Xenopus laevis], CDC23 (cell division cycle 23, yeast, homolog) [Xenopus laevis], NA	Q9UJX2	CDC23	ANAPC8	cell division cycle 23 homolog (S. cerevisiae)	0.2466514915774212	0.6902835759681109	FALSE	FALSE	FALSE
ENOG411CQKN	0	0	0	1	0	0.9688280389827452	0	0.8261233709258723	0	0.5	0.6850648761683639	ENOG411CQKN	Xelaev18029114m.g, Xelaev18014546m.g, Xelaev18011842m.g	Xenbase_9.1	map3k5.S, map3k15.S, map3k15.L	NA	Q99683, Q6ZN16, O95382	MAP3K5, MAP3K15, MAP3K6	ASK1 MAPKKK5 MEKK5, ASK3, ASK2 MAPKKK6 MEKK6	Mitogen-activated protein kinase kinase kinase	0.2466514915774212	0.6902835759681109	FALSE	FALSE	FALSE
ENOG411CR73	0	0	0	1	0	0.9688280389827452	0	0.8261233709258723	0	0.5	0.6850648761683639	ENOG411CR73	148227354, 148227794, 148236442, 2780410, 50417991, Xelaev18020869m.g, Xelaev18029420m.g, Xelaev18027330m.g, Xelaev18029422m.g, Xelaev18027331m.g	GenBank, Xenbase_9.1	irf5.S, irf6.2.S, irf6.L, irf6.S, irf6.2.L	interferon regulatory factor 6 [Xenopus laevis], interferon regulatory factor 5 [Xenopus laevis], interferon regulatory factor 6, gene 2 [Xenopus laevis], xIRF-6 [Xenopus laevis], Unknown (protein for MGC:80414) [Xenopus laevis], NA	O14896, Q13568	IRF6, IRF5	NA	interferon regulatory factor	0.2466514915774212	0.6902835759681109	FALSE	FALSE	FALSE
ENOG411CQTM	0	0	0	1	0	0.9688280389827452	0	0.8261233709258723	0	0.5	0.6850648761683639	ENOG411CQTM	Xelaev18006561m.g, Xelaev18001207m.g	Xenbase_9.1	dgkq.L, dgkq.S	NA	P52824	DGKQ	DAGK4	Diacylglycerol kinase, theta 110kDa	0.2466514915774212	0.6902835759681109	FALSE	FALSE	FALSE
ENOG411CWNG	0	0	0	1	0	0.9688280389827452	0	0.8261233709258723	0	0.5	0.6850648761683639	ENOG411CWNG	148224915, Xelaev18022363m.g	GenBank, Xenbase_9.1	vrk3.L	vaccinia related kinase 3 [Xenopus laevis], NA	Q8IV63	VRK3	NA	Vaccinia related kinase 3	0.2466514915774212	0.6902835759681109	FALSE	FALSE	FALSE
ENOG411CUWE	0	0	0	1	0	0.9688280389827452	0	0.8261233709258723	0	0.5	0.6850648761683639	ENOG411CUWE	171846429, 183985546, Xelaev18038884m.g, Xelaev18042213m.g	GenBank, Xenbase_9.1	nkrf.L, nkrf.S	LOC100158424 protein [Xenopus laevis], LOC100158445 protein [Xenopus laevis], NA	O15226	NKRF	ITBA4 NRF	NFKB repressing factor	0.2466514915774212	0.6902835759681109	FALSE	FALSE	FALSE
ENOG411CZ7Y	0	0	0	1	0	0.9688280389827452	0	0.8261233709258723	0	0.5	0.6850648761683639	ENOG411CZ7Y	Xelaev18047618m.g, Xelaev18045320m.g	Xenbase_9.1	daglb.S, daglb.L	NA	Q8NCG7	DAGLB	NA	diacylglycerol lipase beta	0.2466514915774212	0.6902835759681109	FALSE	FALSE	FALSE
ENOG411D0HU	0	0	0	1	0	0.9688280389827452	0	0.8261233709258723	0	0.5	0.6850648761683639	ENOG411D0HU	Xelaev18018705m.g, Xelaev18045730m.g, Xelaev18045667m.g, Xelaev18000690m.g, Xelaev18003238m.g, Xelaev18035828m.g, Xelaev18039114m.g, Xelaev18045652m.g, Xelaev18018722m.g, Xelaev18045651m.g, Xelaev18018713m.g, Xelaev18045724m.g, Xelaev18043254m.g, Xelaev18035710m.g, Xelaev18045664m.g, Xelaev18023899m.g, Xelaev18045734m.g, Xelaev18007367m.g, Xelaev18047868m.g, Xelaev18018716m.g, Xelaev18045733m.g, …	Xenbase_9.1	Xelaev18018705m.g, loc100490793.L, Xelaev18045667m.g, Xelaev18000690m.g, Xelaev18003238m.g, Xelaev18035828m.g, Xelaev18039114m.g, Xelaev18045652m.g, Xelaev18018722m.g, Xelaev18045651m.g, Xelaev18018713m.g, Xelaev18045724m.g, Xelaev18043254m.g, or5i1.L, loc101735231.L, Xelaev18023899m.g, loc100490114.L, loc100486940.L, loc100490286.S, Xelaev18018716m.g, loc100496245.L, Xelaev18018726m.g, Xelaev180…	NA	Q9UGF6	OR5V1	NA	Olfactory receptor	0.2466514915774212	0.6902835759681109	FALSE	FALSE	FALSE
ENOG411CV68	0	0	0	1	0	0.9688280389827452	0	0.8261233709258723	0	0.5	0.6850648761683639	ENOG411CV68	159154963, Xelaev18023718m.g	GenBank, Xenbase_9.1	cdc42ep1.L	LOC100137624 protein [Xenopus laevis], NA	Q00587	CDC42EP1	BORG5 CEP1 MSE55	CDC42 effector protein (Rho GTPase binding) 1	0.2466514915774212	0.6902835759681109	FALSE	FALSE	FALSE
Xelaev18002985m.g	0	0	0	1	0	0.9688280389827452	0	0.8261233709258723	0	0.5	0.6850648761683639	Xelaev18002985m.g	NA	Xenbase_9.1	Xetrov90030528m.L	NA	NA	NA	NA	NA	0.2466514915774212	0.6902835759681109	FALSE	FALSE	FALSE
ENOG411CS7I	0	0	0	1	0	0.9688280389827452	0	0.8261233709258723	0	0.5	0.6850648761683639	ENOG411CS7I	Xelaev18043994m.g	Xenbase_9.1	tldc2.L	NA	A0PJX2	TLDC2	NA	Chromosome 20 open reading frame 118	0.2466514915774212	0.6902835759681109	FALSE	FALSE	FALSE
ENOG411D2Z3	0	0	0	1	0	0.9688280389827452	0	0.8261233709258723	0	0.5	0.6850648761683639	ENOG411D2Z3	Xelaev18031859m.g, Xelaev18000021m.g	Xenbase_9.1	tmem200c.L, tmem200c.S	NA	A6NKL6	TMEM200C	TTMA	Transmembrane protein 200C	0.2466514915774212	0.6902835759681109	FALSE	FALSE	FALSE
ENOG411DFGV	1	0	1	1	-0.013102639503260374	0.9688280389827452	-0.023690106045100492	0.8261233709258723	0.5	1	0.6757999109241657	ENOG411DFGV	148231187, Xelaev18015123m.g, Xelaev18012051m.g	GenBank, Xenbase_9.1	eya3.S, eya3.L	eyes absent homolog 3 [Xenopus laevis], NA	NA	NA	NA	eyes absent homolog 3 (Drosophila)	0.24958384563604952	0.6946500857228733	FALSE	FALSE	FALSE
ENOG411CR6C	1	0	1	1	-0.013102639503260374	0.9688280389827452	-0.023690106045100492	0.8261233709258723	0.5	1	0.6757999109241657	ENOG411CR6C	1169854, 148227192, 148236687, 148237737, 160333650, 283837890, Xelaev18010134m.g, Xelaev18010132m.g	GenBank, Xenbase_9.1	gnaq.S, gna14.S	RecName: Full=Guanine nucleotide-binding protein subunit alpha-11; Short=G alpha-11; Short=G-protein subunit alpha-11, guanine nucleotide binding protein (G protein), alpha 11 (Gq class) [Xenopus laevis], guanine nucleotide binding protein (G protein), q polypeptide [Xenopus laevis], guanine nucleotide binding protein (G protein), alpha 14 [Xenopus laevis], guanine nucleotide-binding protein G(q)…	P50148, P29992, O95837	GNAQ, GNA11, GNA14	GAQ, GA11, NA	Guanine nucleotide binding protein (G protein)	0.24958384563604952	0.6946500857228733	FALSE	FALSE	FALSE
ENOG411CT1I	1	0	1	1	-0.013102639503260374	0.9688280389827452	-0.023690106045100492	0.8261233709258723	0.5	1	0.6757999109241657	ENOG411CT1I	116063372, 122936402, 189441692, 288557246, 32822858, 84570035, Xelaev18002750m.g, Xelaev18031673m.g	GenBank, Xenbase_9.1	ranbp9.S, ranbp9.L	Unknown (protein for IMAGE:3397851) [Xenopus laevis], LOC779045 protein [Xenopus laevis], ran-binding protein 9 [Xenopus laevis], LOC398677 protein [Xenopus laevis], NA	Q96S59, Q6VN20	RANBP9, RANBP10	RANBPM, KIAA1464	ran binding protein	0.24958384563604952	0.6946500857228733	FALSE	FALSE	FALSE
ENOG411CQ6H	4	6	4	11	-0.02620812261555809	0.9776960097317916	-0.023690106045100332	0.6037309495894243	5	7.5	0.6728035371967489	ENOG411CQ6H	147906156, Xelaev18040861m.g, Xelaev18042961m.g	GenBank, Xenbase_9.1	ilf2.L, ilf2.S	interleukin enhancer binding factor 2, 45kDa [Xenopus laevis], NA	Q12905	ILF2	NF45	Interleukin enhancer binding factor 2, 45kDa	0.2505361435629384	0.6946500857228733	FALSE	FALSE	FALSE
ENOG411D0JQ	2	0	2	1	-0.018530600660750022	0.9688280389827452	-0.023690106045100492	0.8261233709258723	1	1.5	0.6719617627816876	ENOG411D0JQ	147902531, 147904477, Xelaev18016447m.g	GenBank, Xenbase_9.1	ppme1.S	protein phosphatase methylesterase 1 [Xenopus laevis], MGC84679 protein [Xenopus laevis], NA	Q9Y570	PPME1	PME1	Protein phosphatase methylesterase 1	0.25080401959307086	0.6946500857228733	FALSE	FALSE	FALSE
ENOG411CPDQ	1	2	0	9	-1.0139685279334814	1.9632054655522715	-1.0236901060451005	1.5630889650920785	1.5	4.5	0.6712118755429982	ENOG411CPDQ	148233972, 1932815, 213626233, Xelaev18040800m.g, Xelaev18042915m.g, Xelaev18001677m.g	GenBank, Xenbase_9.1	adar.L, adar.S, Xelaev18001677m.g	adenosine deaminase, RNA-specific [Xenopus laevis], dsRNA adenosine deaminase [Xenopus laevis], Unknown (protein for MGC:196762) [Xenopus laevis], NA	P55265	ADAR	ADAR1 DSRAD G1P1 IFI4	Adenosine deaminase, RNA-specific	0.25104278222173954	0.6946500857228733	FALSE	FALSE	FALSE
ENOG411CTYA	1	4	1	8	-0.013102639503260374	0.9622275095732158	-0.023690106045100492	0.6741202774808221	2.5	4.5	0.6711326318192663	ENOG411CTYA	148222262, 148231320, 148233074, 148234227, Xelaev18047172m.g, Xelaev18032982m.g, Xelaev18014513m.g, Xelaev18011778m.g	GenBank, Xenbase_9.1	pdk1.S, pdk4.S, pdk3.S, pdk3.L	pyruvate dehydrogenase kinase 2 [Xenopus laevis], pyruvate dehydrogenase kinase, isozyme 1 [Xenopus laevis], uncharacterized protein LOC494745 [Xenopus laevis], uncharacterized protein LOC398840 [Xenopus laevis], NA	Q15119, Q15120, Q16654	PDK2, PDK3, PDK4	PDHK2, PDHK3, PDHK4	Pyruvate dehydrogenase kinase, isozyme	0.25106802029210756	0.6946500857228733	FALSE	FALSE	FALSE
ENOG411CW2T	1	4	1	8	-0.013102639503260374	0.9622275095732158	-0.023690106045100492	0.6741202774808221	2.5	4.5	0.6711326318192663	ENOG411CW2T	Xelaev18011958m.g, Xelaev18014642m.g, Xelaev18012344m.g	Xenbase_9.1	loc100494487.L, loc100494487.S, mov10.L	NA	Q9HCE1	MOV10	KIAA1631	Mov10, Moloney leukemia virus 10, homolog (mouse)	0.25106802029210756	0.6946500857228733	FALSE	FALSE	FALSE
ENOG411CVZW	1	4	1	8	-0.013102639503260374	0.9622275095732158	-0.023690106045100492	0.6741202774808221	2.5	4.5	0.6711326318192663	ENOG411CVZW	148225758, Xelaev18000878m.g	GenBank, Xenbase_9.1	cops6.S	COP9 signalosome complex subunit 6 [Xenopus laevis], NA	Q7L5N1	COPS6	CSN6 HVIP	COP9 constitutive photomorphogenic homolog subunit 6 (Arabidopsis)	0.25106802029210756	0.6946500857228733	FALSE	FALSE	FALSE
ENOG411CVGW	1	4	1	8	-0.013102639503260374	0.9622275095732158	-0.023690106045100492	0.6741202774808221	2.5	4.5	0.6711326318192663	ENOG411CVGW	147902688, Xelaev18020849m.g, Xelaev18017940m.g	GenBank, Xenbase_9.1	lmf2.S, lmf2.L	lipase maturation factor 2 [Xenopus laevis], NA	Q9BU23	LMF2	TMEM112B TMEM153	Lipase maturation factor 2	0.25106802029210756	0.6946500857228733	FALSE	FALSE	FALSE
ENOG411CZBF	2	4	2	8	-0.018530600660750022	0.9622275095732158	-0.023690106045100492	0.6741202774808221	3	5	0.6672944836767881	ENOG411CZBF	147898885, 71724847, Xelaev18005621m.g	GenBank, Xenbase_9.1	exosc9.L	exosome component 9 [Xenopus laevis], 3' exoribonuclease [Xenopus laevis], NA	Q06265	EXOSC9	PMSCL1	Exosome component 9	0.25229202463311334	0.697066760327936	FALSE	FALSE	FALSE
ENOG411CUG1	1	7	7	4	2.1053601558786528	-1.162649345537149	1.9763098939548995	-0.8519485341867652	4	5.5	0.6665972066903426	ENOG411CUG1	112419036, 57033170, 76780301, Xelaev18030315m.g	GenBank, Xenbase_9.1	eif2b4.S	LOC496301 protein [Xenopus laevis], NA	Q9UI10	EIF2B4	EIF2BD	Eukaryotic translation initiation factor 2B, subunit 4 delta, 67kDa	0.2525147269115591	0.697066760327936	FALSE	FALSE	FALSE
ENOG411D28K	5	10	8	12	0.8027335292599369	0.12402912586202783	0.5612723946760556	0.06713147042966727	7.5	10	0.6553201579871909	ENOG411D28K	148223225, Xelaev18008300m.g, Xelaev18010968m.g	GenBank, Xenbase_9.1	ndufs4.L, ndufs4.S	NADH dehydrogenase (ubiquinone) Fe-S protein 4, 18kDa (NADH-coenzyme Q reductase) [Xenopus laevis], NA	O43181	NDUFS4	NA	NADH dehydrogenase (ubiquinone) Fe-S protein 4, 18kDa (NADH-coenzyme Q reductase)	0.25613082245652286	0.7062473471817048	FALSE	FALSE	FALSE
ENOG411CTCS	17	29	25	31	1.1810663751925725	-0.25767562413506445	0.5068246106536793	-0.08076722468264629	23	28	0.6529358617577031	ENOG411CTCS	147904469, 148222361, Xelaev18047636m.g	GenBank, Xenbase_9.1	uqcrc2.S	Ubiquinol-cytochrome C reductase complex [Xenopus laevis], ubiquinol-cytochrome c reductase core protein II [Xenopus laevis], NA	P22695	UQCRC2	NA	ubiquinol-cytochrome c reductase core protein II	0.2568988141232168	0.7075627587176254	FALSE	FALSE	FALSE
ENOG411CQF2	3	9	6	10	0.9770506825627818	-0.05772972244998908	0.7836648160125037	-0.03637310532419269	6	8	0.6500580849826832	ENOG411CQF2	147903082, Xelaev18046289m.g, Xelaev18046282m.g	GenBank, Xenbase_9.1	Xelaev18046289m.g, Xelaev18046282m.g	vesicle-associated membrane protein-associated protein B/C [Xenopus laevis], NA	O95292	VAPB	NA	VAMP (vesicle-associated membrane protein)-associated protein B and C	0.2578273513160936	0.7085626864192439	FALSE	FALSE	FALSE
ENOG411CYGS	14	30	15	41	0.13674558715122562	0.7825000053716471	0.06941929834638096	0.2642444833177576	22	28	0.6500047920487692	ENOG411CYGS	11385666, 11385668, 147905967, Xelaev18021868m.g, Xelaev18024486m.g	GenBank, Xenbase_9.1	ckap5.L, ckap5.S	microtubule associated protein XMAP215 isoform M [Xenopus laevis], microtubule associated protein XMAP215 isoform Z [Xenopus laevis], cytoskeleton associated protein 5 [Xenopus laevis], NA	Q14008	CKAP5	KIAA0097	Cytoskeleton associated protein 5	0.2578445631089765	0.7085626864192439	FALSE	FALSE	FALSE
ENOG411CPM6	7	7	11	8	0.9082157742862715	0.005064077688451338	0.5612723946760559	-0.003951627631815405	7	9.5	0.6457863764523728	ENOG411CPM6	47124949, 76779473, Xelaev18039428m.g, Xelaev18042597m.g	GenBank, Xenbase_9.1	timm50.L, timm50.S	LOC431826 protein [Xenopus laevis], Unknown (protein for IMAGE:7394490) [Xenopus laevis], NA	Q3ZCQ8	TIMM50	TIM50	Translocase of inner mitochondrial membrane 50 homolog (S. cerevisiae)	0.2592088560451985	0.7097496691790335	FALSE	FALSE	FALSE
ENOG411CPNN	0	1	0	3	0	0.9010527153641567	0	0.8261233709258723	0.5	1.5	0.6371404852405471	ENOG411CPNN	147904930, 148224600, 189029219, 76779622, Xelaev18008204m.g	GenBank, Xenbase_9.1	mtx3.L	metaxin 1 [Xenopus laevis], metaxin-3 [Xenopus laevis], RecName: Full=Metaxin-3; Short=xMTX3, LOC407751 protein [Xenopus laevis], NA	Q13505, Q5HYI7	MTX1, MTX3	MTX MTXN, NA	Metaxin 3	0.2620166698380424	0.7097496691790335	FALSE	FALSE	FALSE
ENOG411CPGW	0	1	0	3	0	0.9010527153641567	0	0.8261233709258723	0.5	1.5	0.6371404852405471	ENOG411CPGW	147902170	GenBank	NA	sec1 family domain containing 1 [Xenopus laevis]	Q8WVM8	SCFD1	C14orf163 KIAA0917 STXBP1L2	Sec1 family domain containing 1	0.2620166698380424	0.7097496691790335	FALSE	FALSE	FALSE
ENOG411CQXQ	0	1	0	3	0	0.9010527153641567	0	0.8261233709258723	0.5	1.5	0.6371404852405471	ENOG411CQXQ	Xelaev18016129m.g, Xelaev18029867m.g, Xelaev18013668m.g, Xelaev18027796m.g	Xenbase_9.1	wdfy2.S, wdfy1-like.S, wdfy2.L, wdfy1-like.L	NA	Q8IWB7, Q96P53	WDFY1, WDFY2	FENS1 KIAA1435 WDF1 ZFYVE17, WDF2 ZFYVE22	WD repeat and FYVE domain containing	0.2620166698380424	0.7097496691790335	FALSE	FALSE	FALSE
ENOG411CYV0	0	1	0	3	0	0.9010527153641567	0	0.8261233709258723	0.5	1.5	0.6371404852405471	ENOG411CYV0	148237346, Xelaev18039029m.g	GenBank, Xenbase_9.1	rbmx.L	RNA binding motif protein, X-linked [Xenopus laevis], NA	P38159, Q96E39, O75526	RBMX, RBMXL1, RBMXL2	HNRPG RBMXP1, NA, HNRNPGT	RNA binding motif protein	0.2620166698380424	0.7097496691790335	FALSE	FALSE	FALSE
ENOG411DF3R	0	1	0	3	0	0.9010527153641567	0	0.8261233709258723	0.5	1.5	0.6371404852405471	ENOG411DF3R	Xelaev18034249m.g	Xenbase_9.1	tdrd1.L	NA	NA	NA	NA	tudor domain containing 1	0.2620166698380424	0.7097496691790335	FALSE	FALSE	FALSE
ENOG411CZDZ	0	1	0	3	0	0.9010527153641567	0	0.8261233709258723	0.5	1.5	0.6371404852405471	ENOG411CZDZ	148223872, 148236595, Xelaev18031911m.g, Xelaev18033652m.g	GenBank, Xenbase_9.1	riok3.L, riok3.S	RIO kinase 3 [Xenopus laevis], NA	O14730	RIOK3	SUDD	RIO kinase 3 (Yeast)	0.2620166698380424	0.7097496691790335	FALSE	FALSE	FALSE
ENOG411CYMS	0	1	0	3	0	0.9010527153641567	0	0.8261233709258723	0.5	1.5	0.6371404852405471	ENOG411CYMS	Xelaev18039124m.g	Xenbase_9.1	vps52.L	NA	Q8N1B4	VPS52	SACM2L	vacuolar protein sorting 52 homolog (S. cerevisiae)	0.2620166698380424	0.7097496691790335	FALSE	FALSE	FALSE
ENOG411CVXN	0	1	0	3	0	0.9010527153641567	0	0.8261233709258723	0.5	1.5	0.6371404852405471	ENOG411CVXN	148230052, 148231518, Xelaev18036067m.g	GenBank, Xenbase_9.1	akt1s1.L	hypothetical protein LOC495075 [Xenopus laevis], AKT1 substrate 1 (proline-rich) [Xenopus laevis], NA	Q96B36	AKT1S1	PRAS40	AKT1 substrate 1 (Proline-rich)	0.2620166698380424	0.7097496691790335	FALSE	FALSE	FALSE
ENOG411CRT1	0	1	0	3	0	0.9010527153641567	0	0.8261233709258723	0.5	1.5	0.6371404852405471	ENOG411CRT1	148237727, 16903096, 3047240, Xelaev18033482m.g, Xelaev18031694m.g, Xelaev18033159m.g	GenBank, Xenbase_9.1	nup153.S, nup153.L, Xelaev18033159m.g	nucleoporin Nup153 [Xenopus laevis], nucleoporin Nup153 homolog [Xenopus laevis], NA	P49790	NUP153	NA	Nucleoporin 153kDa	0.2620166698380424	0.7097496691790335	FALSE	FALSE	FALSE
ENOG411CW0Y	0	1	0	3	0	0.9010527153641567	0	0.8261233709258723	0.5	1.5	0.6371404852405471	ENOG411CW0Y	147898592, 37590291, Xelaev18039022m.g	GenBank, Xenbase_9.1	htatsf1.L	HIV Tat-specific factor 1 [Xenopus laevis], LOC398736 protein [Xenopus laevis], NA	O43719	HTATSF1	NA	HIV-1 Tat specific factor 1	0.2620166698380424	0.7097496691790335	FALSE	FALSE	FALSE
ENOG411CWIK	0	1	0	3	0	0.9010527153641567	0	0.8261233709258723	0.5	1.5	0.6371404852405471	ENOG411CWIK	148224469, 27735409, Xelaev18015070m.g	GenBank, Xenbase_9.1	gpn2.S	hypothetical protein LOC398460 [Xenopus laevis], LOC398460 protein [Xenopus laevis], NA	Q9H9Y4	GPN2	ATPBD1B	GPN-loop GTPase 2	0.2620166698380424	0.7097496691790335	FALSE	FALSE	FALSE
ENOG411CRPP	0	1	1	1	0.9954389325039961	-0.09588637572323629	0.9763098939548995	-0.17387662907412774	0.5	1	0.636079712933372	ENOG411CRPP	147906947, 148223637, Xelaev18010737m.g, Xelaev18007954m.g	GenBank, Xenbase_9.1	phax.S, phax.L	phosphorylated adaptor for RNA export [Xenopus laevis], uncharacterized protein LOC734641 [Xenopus laevis], NA	Q9H814	PHAX	RNUXA	phosphorylated adaptor for RNA export	0.2623622337960325	0.7097496691790335	FALSE	FALSE	FALSE
ENOG411CV80	0	1	1	1	0.9954389325039961	-0.09588637572323629	0.9763098939548995	-0.17387662907412774	0.5	1	0.636079712933372	ENOG411CV80	13487713, 148227040, 148236996, 6689545, Xelaev18033529m.g, Xelaev18031750m.g	GenBank, Xenbase_9.1	ctdp1.S, ctdp1.L	CTD phosphatase [Xenopus laevis], FCP1 serine phosphatase [Xenopus laevis], CTD (carboxy-terminal domain, RNA polymerase II, polypeptide A) phosphatase, subunit 1 [Xenopus laevis], NA	Q9Y5B0	CTDP1	FCP1	CTD (Carboxy-terminal domain, RNA polymerase II, polypeptide A) phosphatase, subunit 1	0.2623622337960325	0.7097496691790335	FALSE	FALSE	FALSE
ENOG411D07I	1	1	1	3	-0.013102639503260374	0.9010527153641567	-0.023690106045100492	0.8261233709258723	1	2	0.6278755199963489	ENOG411D07I	148230853, 148236972, Xelaev18010481m.g, Xelaev18007584m.g, Xelaev18045630m.g, Xelaev18047845m.g	GenBank, Xenbase_9.1	pisd.S, pisd.L, pisd-like.2.L, pisd-like.2.S	phosphatidylserine decarboxylase [Xenopus laevis], similar to phosphatidylserine decarboxylase [Xenopus laevis], NA	Q9UG56	PISD	NA	phosphatidylserine decarboxylase	0.2650427443615298	0.7146163573029274	FALSE	FALSE	FALSE
ENOG411CX60	1	1	1	3	-0.013102639503260374	0.9010527153641567	-0.023690106045100492	0.8261233709258723	1	2	0.6278755199963489	ENOG411CX60	147901790, Xelaev18038579m.g	GenBank, Xenbase_9.1	naa10.L	alpha-N-acetyltransferase 1A [Xenopus laevis], NA	P41227, Q9BSU3	NAA10, NAA11	ARD1 ARD1A TE2, ARD1B ARD2	NatA catalytic subunit	0.2650427443615298	0.7146163573029274	FALSE	FALSE	FALSE
ENOG411CQHM	1	1	1	3	-0.013102639503260374	0.9010527153641567	-0.023690106045100492	0.8261233709258723	1	2	0.6278755199963489	ENOG411CQHM	147905979, Xelaev18017584m.g	GenBank, Xenbase_9.1	rpap3.L	RNA polymerase II-associated protein 3 [Xenopus laevis], NA	Q9H6T3	RPAP3	NA	RNA polymerase II associated protein 3	0.2650427443615298	0.7146163573029274	FALSE	FALSE	FALSE
ENOG411CP9D	1	2	2	3	0.5640392668774026	0.31199846928016123	0.5612723946760559	0.241160870204716	1.5	2.5	0.6194522238123248	ENOG411CP9D	147904396, Xelaev18037984m.g, Xelaev18036416m.g	GenBank, Xenbase_9.1	akr7a2.S, akr7a2.L	aldo-keto reductase family 7, member A2 (aflatoxin aldehyde reductase) [Xenopus laevis], NA	O43488, Q8NHP1, O95154	AKR7A2, AKR7L, AKR7A3	AFAR AFAR1 AKR7, AFAR3 AKR7A4, AFAR2	aldo-keto reductase family 7, member A2 (aflatoxin aldehyde reductase)	0.2678092432186084	0.7212758355566508	FALSE	FALSE	FALSE
ENOG411CVPK	4	2	3	6	-0.404298531855121	1.2743298740759423	-0.345618200932463	1.04851579226232	3	4.5	0.6152050619291766	ENOG411CVPK	111185520, 147900482, Xelaev18030524m.g, Xelaev18032733m.g, Xelaev18013362m.g, Xelaev18015860m.g	GenBank, Xenbase_9.1	smarcc1.L, smarcc1.S, smarcc2.L, smarcc2.S	Smarcc1 protein [Xenopus laevis], SWI/SNF related, matrix associated, actin dependent regulator of chromatin, subfamily c, member 2 [Xenopus laevis], NA	Q92922, Q8TAQ2	SMARCC1, SMARCC2	BAF155, BAF170	SWI SNF related, matrix associated, actin dependent regulator of chromatin, subfamily c, member	0.26920965264688523	0.7242454372093197	FALSE	FALSE	FALSE
ENOG411CP95	0	2	1	2	0.9954389325039961	-0.13560641488097533	0.9763098939548995	-0.17387662907412774	1	1.5	0.6079934038959395	ENOG411CP95	148231688, 148234257, 27694932	GenBank	NA	similar to signal sequence receptor, alpha precursor [Xenopus laevis], signal sequence receptor, alpha (translocon-associated protein alpha) precursor [Xenopus laevis], Ssr1 protein [Xenopus laevis]	P43307	SSR1	TRAPA	signal sequence receptor, alpha	0.2715959243411522	0.7282483880900575	FALSE	FALSE	FALSE
ENOG411CVG5	0	2	1	2	0.9954389325039961	-0.13560641488097533	0.9763098939548995	-0.17387662907412774	1	1.5	0.6079934038959395	ENOG411CVG5	148230597, Xelaev18002195m.g, Xelaev18003380m.g, Xelaev18007855m.g, Xelaev18010661m.g	GenBank, Xenbase_9.1	atxn2l.S, atxn2l.L, atxn2.L, atxn2.S	ataxin 2 [Xenopus laevis], NA	Q99700, Q8WWM7	ATXN2, ATXN2L	ATX2 SCA2 TNRC13, A2D A2LG A2LP A2RP	Ataxin 2-like	0.2715959243411522	0.7282483880900575	FALSE	FALSE	FALSE
ENOG411CPFF	0	2	1	2	0.9954389325039961	-0.13560641488097533	0.9763098939548995	-0.17387662907412774	1	1.5	0.6079934038959395	ENOG411CPFF	148227022, 148227326, Xelaev18023307m.g, Xelaev18001240m.g, Xelaev18006517m.g	GenBank, Xenbase_9.1	snx7.L, snx30.S, snx30.L	sorting nexin-30 [Xenopus laevis], sorting nexin 7 [Xenopus laevis], NA	Q5VWJ9, Q9UNH6	SNX30, SNX7	NA	sorting nexin	0.2715959243411522	0.7282483880900575	FALSE	FALSE	FALSE
ENOG411CR3D	8	16	8	24	-0.037069246444891804	0.8827614050919701	-0.023690106045100655	0.3825167194502577	12	16	0.5979946601756385	ENOG411CR3D	147903655, 148224152, 55154507, Xelaev18010244m.g	GenBank, Xenbase_9.1	prmt5.S	protein arginine methyltransferase 5 [Xenopus laevis], methyltransferase Hsl7 [Xenopus laevis], LOC495515 protein [Xenopus laevis], NA	O14744	PRMT5	HRMT1L5 IBP72 JBP1 SKB1	protein arginine methyltransferase 5	0.27492174803732555	0.7363542854920437	FALSE	FALSE	FALSE
ENOG411CTB9	0	4	2	3	1.407788694550312	-0.5712271877856894	1.561272394676056	-0.49580472396149006	2	2.5	0.5915383143129005	ENOG411CTB9	147906037, 148236507, 148236741, Xelaev18034803m.g, Xelaev18009114m.g	GenBank, Xenbase_9.1	pdlim1.L, Xelaev18009114m.g	similar to PDZ and LIM domain 1 (elfin) [Xenopus laevis], PDZ and LIM domain protein 3 [Xenopus laevis], PDZ and LIM domain 1 [Xenopus laevis], NA	O00151, Q53GG5	PDLIM1, PDLIM3	CLIM1 CLP36, ALP	PDZ and LIM domain	0.27707989563267316	0.7410016362675965	FALSE	FALSE	FALSE
ENOG411CT86	13	13	9	26	-0.9006120180242815	1.7351298946020306	-0.509116933215342	0.7736559510317367	13	17.5	0.5900932495495247	ENOG411CT86	148226196, 27694989, 39963558, Xelaev18031081m.g, Xelaev18033141m.g, Xelaev18037352m.g, Xelaev18035296m.g	GenBank, Xenbase_9.1	stt3b.L, stt3b.S, stt3a.S, stt3a.L	STT3, subunit of the oligosaccharyltransferase complex, homolog A [Xenopus laevis], Itm1 protein [Xenopus laevis], LOC779022 protein [Xenopus laevis], NA	P46977, Q8TCJ2	STT3A, STT3B	ITM1 TMC, SIMP	STT3, subunit of the oligosaccharyltransferase complex, homolog	0.2775640671335251	0.7410016362675965	FALSE	FALSE	FALSE
ENOG411CZ8B	0	3	0	6	0	0.8332894809395722	0	0.6334782929834764	1.5	3	0.5892246426637898	ENOG411CZ8B	124481711, 169642723, Xelaev18037657m.g, Xelaev18037653m.g, Xelaev18037656m.g, Xelaev18035874m.g, Xelaev18037655m.g, Xelaev18037654m.g	GenBank, Xenbase_9.1	6330408a02rik-like.2.S, Xelaev18037653m.g, 6330408a02rik-like.1.S, Xelaev18035874m.g, Xetrov90018982m.S, Xetrov90018981m.S	LOC100037150 protein [Xenopus laevis], NA	Q86XI8	ZSWIM9	C19orf68	chromosome 19 open reading frame 68	0.27785529419922206	0.7410016362675965	FALSE	FALSE	FALSE
ENOG411D0AX	5	4	4	9	-0.3627481136738841	1.1932226486344832	-0.28672451187889425	0.8261233709258724	4.5	6.5	0.5872341752733841	ENOG411D0AX	148236849, Xelaev18037091m.g	GenBank, Xenbase_9.1	ecd.S	ecdysoneless homolog [Xenopus laevis], NA	O95905	ECD	NA	ecdysoneless homolog (Drosophila)	0.2785232214086908	0.7410016362675965	FALSE	FALSE	FALSE
ENOG411D2XW	0	3	1	3	0.9954389325039961	-0.16608644798370226	0.9763098939548995	-0.17387662907412774	1.5	2	0.5864407657982108	ENOG411D2XW	109157556, 11513397, 116667156, 119389961, 122074, 134104559, 148234575, 209156433, 214274, 288990, 28948510, 295982349, 296278470, 299689065, 3745758, 4388695, 46015075, 46015085, 46015095, 46015135, 46015145, 46015155, 90108627, Xelaev18004100m.g, Xelaev18030451m.g, Xelaev18001465m.g	GenBank, Xenbase_9.1	Xelaev18004100m.g, loc101732683.L, Xelaev18001465m.g	Chain A, 2.9 Angstrom X-Ray Structure Of Hybrid Macroh2a Nucleosomes, Chain A, 2.6 A Crystal Structure Of A Nucleosome Core Particle Containing The Variant Histone H2a.Z, Chain A, Crystal Structure Of Nucleosome Core Particle Containing A Poly (Da.Dt) Sequence Element, Chain B, Structure Of The H3-H4 Chaperone Asf1 Bound To Histones H3 And H4, RecName: Full=Histone H3.3C, Chain B, Crystal Structu…	P68431, Q71DI3, Q5TEC6	HIST1H3A; HIST1H3B; HIST1H3C; HIST1H3D; HIST1H3E; HIST1H3F; HIST1H3G; HIST1H3H; HIST1H3I; HIST1H3J, HIST2H3A; HIST2H3C; HIST2H3D, HIST2H3PS2	H3FA; H3FL; H3FC; H3FB; H3FD; H3FI; H3FH; H3FK; H3FF; H3FJ, ; H3F2 H3FM;, NA	histone H3	0.27878967811877087	0.7410016362675965	FALSE	FALSE	FALSE
ENOG411D1NZ	0	3	1	3	0.9954389325039961	-0.16608644798370226	0.9763098939548995	-0.17387662907412774	1.5	2	0.5864407657982108	ENOG411D1NZ	147904491, 292494998, Xelaev18044303m.g	GenBank, Xenbase_9.1	coil.L	coilin [Xenopus laevis], RecName: Full=Coilin; AltName: Full=Sphere organelles protein SPH-1; Short=Sphere protein 1, NA	P38432	COIL	CLN80	K13150 coilin	0.27878967811877087	0.7410016362675965	FALSE	FALSE	FALSE
ENOG411CSQG	0	3	1	3	0.9954389325039961	-0.16608644798370226	0.9763098939548995	-0.17387662907412774	1.5	2	0.5864407657982108	ENOG411CSQG	148226330, Xelaev18020868m.g, Xelaev18017920m.g	GenBank, Xenbase_9.1	tnpo3.S, tnpo3.L	transportin 3 [Xenopus laevis], NA	Q9Y5L0	TNPO3	IPO12	transportin 3	0.27878967811877087	0.7410016362675965	FALSE	FALSE	FALSE
ENOG411D08P	10	5	10	9	-0.041447677005148	0.8546208489261593	-0.023690106045100655	0.5630889650920785	7.5	9.5	0.5750002641443214	ENOG411D08P	147900550, 148237552	GenBank	NA	ATP synthase, H+ transporting, mitochondrial Fo complex, subunit d [Xenopus laevis], uncharacterized protein LOC414718 [Xenopus laevis]	O75947	ATP5PD	ATP5H	ATP synthase, H transporting, mitochondrial Fo complex, subunit d	0.2826455591754956	0.7504301309113595	FALSE	FALSE	FALSE
[truncated: 1,516 more rows]
