# Supplementary material for: Functional partitioning of a liquid-like organelle during assembly of axonemal dyneins
Source: eLife journal article supplement (doi:10.7554/elife.58662), 2020-12-02
Supplement: supp [file elife-58662-supp-v1.zip › elife_poa_e58662_Supplementary_file_2.csv]

accession	ctrl_PSMs_b1	ctrl_PSMs_b2	exp_PSMs_b1	exp_PSMs_b2	PSM_zscore_b1	PSM_zscore_b2	PSM_log2fc_b1	PSM_log2fc_b2	mean_ctrl_PSMs	mean_exp_PSMs	joint_zscore	description	xl_id	xl_id_source	xenla_xen_base_gene_names	xenla_gen_bank_description	human_uni_prot_id	human_gene_names_primary	human_gene_names_synonyms	egg_nog_annotation	pval	fdr_bh	conf_90	conf_95	conf_99
ENOG411DGH8	0	0	192	252	12.820393182640164	14.496487498910561	7.135748341818873	7.430809228478307	0	222	19.315951570788314	ENOG411DGH8	148230338, Xelaev18025110m.g	GenBank, Xenbase_9.1	wdr78.S	WD repeat domain 78 [Xenopus laevis], NA	Q5VTH9	WDR78	NA	WD repeat domain 78	1.9719795858192333e-83	5.27307341248063e-80	TRUE	TRUE	TRUE
ENOG411D08K	0	0	78	141	8.157644455190981	10.833862128216861	5.847072052727896	6.597562773288679	0	109.5	13.429023090076644	ENOG411D08K	Xelaev18019324m.g	Xenbase_9.1	dnah2.L	NA	Q9P225	DNAH2	DNAHC2 DNHD3 KIAA1503	dynein, axonemal, heavy chain 2	2.0438415718196123e-41	2.732616181522822e-38	TRUE	TRUE	TRUE
Xelaev18037980m.g	1	6	41	90	5.637639778409299	7.532829061628959	3.935608727329553	3.148255371925089	3.5	65.5	9.312927828197173	Xelaev18037980m.g	NA	Xenbase_9.1	ubr4.S	NA	NA	NA	NA	NA	6.217808003835227e-21	5.542139534085133e-18	TRUE	TRUE	TRUE
ENOG411DGH6	0	0	20	53	4.12724600943046	6.637491306080329	3.935608727329553	5.202703155947465	0	36.5	7.61181875348955	ENOG411DGH6	Xelaev18022884m.g	Xenbase_9.1	wdr63.L	NA	NA	NA	NA	WD repeat domain 63	1.3513269608451099e-14	9.03362073324956e-12	TRUE	TRUE	TRUE
ENOG411CQ77	10	30	66	99	5.4842840290284185	4.306893060749454	2.149948876371268	1.1374755331718462	20	82.5	6.923407715980298	ENOG411CQ77	148234619, Xelaev18044865m.g, Xelaev18028448m.g	GenBank, Xenbase_9.1	cps1.L, cad.L	carbamoyl-phosphate synthase 1, mitochondrial [Xenopus laevis], NA	P27708, P31327	CAD, CPS1	NA	Carbamoyl-phosphate synthetase 2, aspartate transcarbamylase, and dihydroorotase	2.2045320589508823e-12	1.1789837451269317e-9	TRUE	TRUE	TRUE
ENOG411CTZP	0	0	13	42	3.327148365216974	5.908159912428171	3.3506462266083967	4.874080408486095	0	27.5	6.530349109471137	ENOG411CTZP	11761138, 2749954, Xelaev18031990m.g	GenBank, Xenbase_9.1	prkdc.L	DNA-dependent protein kinase catalytic subunit [Xenopus laevis], DNA-dependent protein kinase [Xenopus laevis], NA	P78527	PRKDC	HYRC HYRC1	protein kinase, DNA-activated, catalytic polypeptide	3.2808281969790554e-11	1.4621557664536658e-8	TRUE	TRUE	TRUE
ENOG411CZFK	32	80	89	213	3.6502033223744346	4.909055487075408	0.9907502815220137	0.8494326373005192	56	151	6.052309946092678	ENOG411CZFK	Xelaev18041192m.g, Xelaev18039698m.g	Xenbase_9.1	dync1h1.S, dync1h1.L	NA	Q14204	DYNC1H1	DHC1 DNCH1 DNCL DNECL DYHC KIAA0325	dynein, cytoplasmic 1, heavy chain 1	7.139170375866309e-10	2.72716308358093e-7	TRUE	TRUE	TRUE
ENOG411CS6K	0	0	12	28	3.196573579144807	4.823449165010887	3.2437310226918847	4.305796648911569	0	20	5.671012467662835	ENOG411CS6K	Xelaev18026429m.g	Xenbase_9.1	cul9.L	NA	Q8IWT3, Q14999	CUL9, CUL7	H7AP1 KIAA0708 PARC, KIAA0076	Cullin 9	7.097803293198474e-9	2.37244075075159e-6	TRUE	TRUE	TRUE
ENOG411CX8F	2	2	16	37	2.86094821735783	4.959524679506261	2.045791645079976	3.110780666506426	2	26.5	5.529909417458202	ENOG411CX8F	Xelaev18018015m.g	Xenbase_9.1	vps13c.L	NA	Q709C8	VPS13C	KIAA1421	vacuolar protein sorting 13 homolog C (S. cerevisiae)	1.601980938382885e-8	4.759663365817594e-6	TRUE	TRUE	TRUE
ENOG411CP8E	0	0	11	26	3.0604410350482905	4.6479171535494705	3.128253805271949	4.202703155947465	0	18.5	5.450632346972329	ENOG411CP8E	Xelaev18033921m.g, Xelaev18032259m.g	Xenbase_9.1	ubr5.S, ubr5.L	NA	O95071	UBR5	EDD EDD1 HYD KIAA0896	Ubiquitin protein ligase E3 component n-recognin 5	2.5095517485463553e-8	6.710541375612954e-6	TRUE	TRUE	TRUE
ENOG411CP6U	10	17	42	66	3.554841786901587	4.03247696137384	1.5101244406155934	1.343979842799457	13.5	54	5.365044537929382	ENOG411CP6U	148228559, Xelaev18036111m.g, Xelaev18037832m.g	GenBank, Xenbase_9.1	Xelaev18036111m.g, otog.S	otogelin precursor [Xenopus laevis], NA	Q3ZCN5	OTOGL	C12orf64	Otogelin-like	4.0464623667955585e-8	9.836582153464839e-6	TRUE	TRUE	TRUE
Xelaev18027277m.g	0	1	7	30	2.441243282114779	4.664017195477236	2.5432913045507926	3.4020119641708724	0.5	18.5	5.024177865802081	Xelaev18027277m.g	NA	Xenbase_9.1	mdn1.L	NA	NA	NA	NA	NA	2.527968224310847e-7	5.633155859839338e-5	TRUE	TRUE	TRUE
ENOG411CXPY	0	0	9	21	2.7681913795191497	4.176994356523117	2.865219399438155	3.9072472724212943	0	15	4.91098793055557	ENOG411CXPY	Xelaev18016620m.g	Xenbase_9.1	casc1.L	NA	Q6TDU7	CASC1	LAS1 PPP1R54	Cancer susceptibility candidate 1	4.5309333205701856e-7	9.319781307080519e-5	TRUE	TRUE	TRUE
ENOG411CWA4	27	42	66	124	2.640381306563355	4.282854011701823	0.802025572950961	0.987335183743986	34.5	95	4.895466641295513	ENOG411CWA4	152012986, Xelaev18010449m.g, Xelaev18007546m.g	GenBank, Xenbase_9.1	gcn1.S, gcn1.L	LOC100125671 protein [Xenopus laevis], NA	Q92616	GCN1	GCN1L1 KIAA0219	GCN1 general control of amino-acid synthesis 1-like 1 (Yeast)	4.903636399692602e-7	9.36594552341287e-5	TRUE	TRUE	TRUE
ENOG411CTXF	0	0	9	20	2.7681913795191497	4.076296316537476	2.865219399438155	3.8401330765627573	0	14.5	4.83978366362953	ENOG411CTXF	Xelaev18007770m.g	Xenbase_9.1	dnah10.L	NA	Q8IVF4	DNAH10	KIAA2017	Dynein, axonemal, heavy chain 10	6.499027131391074e-7	1.094221003171228e-4	TRUE	TRUE	TRUE
ENOG411CWNW	0	0	12	16	3.196573579144807	3.6458329913627416	3.2437310226918847	3.5352784950343366	0	14	4.8383120856412765	ENOG411CWNW	Xelaev18047744m.g, Xelaev18045497m.g	Xenbase_9.1	tsc2.S, tsc2.L	NA	P49815	TSC2	TSC4	Tuberous sclerosis 2	6.547320886589247e-7	1.094221003171228e-4	TRUE	TRUE	TRUE
ENOG411CW2A	1	1	15	20	3.132147245856194	3.6772139720419443	2.5432913045507926	2.8401330765627573	1	17.5	4.814945492724461	ENOG411CW2A	Xelaev18041001m.g, Xelaev18040017m.g	Xenbase_9.1	hectd1.S, hectd1.L	NA	Q9ULT8	HECTD1	KIAA1131	HECT domain containing E3 ubiquitin protein ligase 1	7.362003744999704e-7	1.157999883184071e-4	TRUE	TRUE	TRUE
ENOG411D0XC	0	0	6	24	2.260118752373529	4.465502530310325	2.3506462266083967	4.091671843558721	0	15	4.755732416678319	ENOG411D0XC	114306822, 11493740, Xelaev18007393m.g	GenBank, Xenbase_9.1	pole.L	DNA polymerase epsilon catalytic subunit [Xenopus laevis], DNA polymerase epsilon [Xenopus laevis], NA	Q07864	POLE	POLE1	polymerase (DNA directed), epsilon, catalytic subunit	9.886411497745962e-7	1.4686813524984833e-4	TRUE	TRUE	TRUE
ENOG411CQT4	19	34	57	93	3.1732118453657194	3.3650886383613225	1.0793442047910025	0.8731214885166679	26.5	75	4.623276609478675	ENOG411CQT4	147905081, 148228458, Xelaev18020350m.g, Xelaev18017107m.g	GenBank, Xenbase_9.1	gfpt1.S, gfpt2.L	glutamine-fructose-6-phosphate transaminase 2 [Xenopus laevis], glutamine--fructose-6-phosphate transaminase 1 [Xenopus laevis], NA	Q06210, O94808	GFPT1, GFPT2	GFAT GFPT, NA	glutamine-fructose-6-phosphate transaminase	1.8886274528712224e-6	2.6579946363040256e-4	TRUE	TRUE	TRUE
ENOG411D1F9	0	1	4	30	1.8453247825788208	4.664017195477236	1.8652193994381552	3.4020119641708724	0.5	17	4.602799853745692	ENOG411D1F9	1129173, 147903475, 300087, 49255967, Xelaev18033196m.g, Xelaev18031144m.g	GenBank, Xenbase_9.1	kif15.S, kif15.L	KLP2 protein [Xenopus laevis], kinesin-like protein KIF15-B [Xenopus laevis], Klp=kinesin-like protein {clone XKlp2} [Xenopus laevis, oocytes, Peptide Partial, 330 aa], Kif15-b protein [Xenopus laevis], NA	Q9NS87	KIF15	KLP2 KNSL7	Kinesin family member 15	2.084243894910174e-6	2.723251094641549e-4	TRUE	TRUE	TRUE
ENOG411CRKW	0	3	16	19	3.691303124497838	2.810443693657312	3.630754145801132	1.7697437486713592	1.5	17.5	4.597429264675565	ENOG411CRKW	12025476, 147905646, 148228344, 213626677, 27447665, 47937568, Xelaev18010553m.g, Xelaev18010552m.g, Xelaev18035073m.g, Xelaev18007708m.g, Xelaev18037256m.g	GenBank, Xenbase_9.1	Xelaev18010553m.g, arvcf.S, ctnnd1.L, arvcf.L, ctnnd1.S	p120 [Xenopus laevis], armadillo repeat gene deletes in velo-cardio-facial syndrome [Xenopus laevis], catenin delta-1 [Xenopus laevis], Arvcf protein [Xenopus laevis], p120 isoform 2 [Xenopus laevis], NA	O60716, O00192	CTNND1, ARVCF	KIAA0384, NA	Catenin (Cadherin-associated protein), delta 1	2.138678870137342e-6	2.723251094641549e-4	TRUE	TRUE	TRUE
ENOG411CQKW	1	8	14	38	2.9965509495164833	3.481290522101366	2.4501819001593113	1.563292871203933	4.5	26	4.580525632032425	ENOG411CQKW	Xelaev18032508m.g	Xenbase_9.1	oplah.L	NA	O14841	OPLAH	NA	5-oxoprolinase (ATP-hydrolysing)	2.31904383071321e-6	2.8186923651486923e-4	TRUE	TRUE	TRUE
ENOG411CTT2	4	5	16	39	2.12663101494143	4.320607764926227	1.3088260509137697	2.184781247950203	4.5	27.5	4.558886261173303	ENOG411CTT2	147899332, 148230258, Xelaev18014241m.g, Xelaev18011569m.g	GenBank, Xenbase_9.1	gbe1.S, gbe1.L	glucan (1,4-alpha-), branching enzyme 1 (glycogen branching enzyme, Andersen disease, glycogen storage disease type IV) [Xenopus laevis], glucan (1,4-alpha-), branching enzyme 1 [Xenopus laevis], NA	Q04446	GBE1	NA	Glucan (1,4-alpha-), branching enzyme 1	2.5712805647089074e-6	2.9893931434920077e-4	TRUE	TRUE	TRUE
ENOG411CPBI	3	5	17	33	2.626784763563687	3.76168264659952	1.7132163059931051	1.9503159943131803	4	25	4.517328627115664	ENOG411CPBI	147901151, 147901506, Xelaev18009279m.g, Xelaev18005551m.g	GenBank, Xenbase_9.1	clgn.S, clgn.L	calnexin precursor [Xenopus laevis], calnexin [Xenopus laevis], NA	P27824, O14967	CANX, CLGN	NA	Calnexin	3.1312337393162206e-6	3.4887162578881557e-4	TRUE	TRUE	TRUE
ENOG411CUSR	0	0	11	13	3.0604410350482905	3.286230173576047	3.128253805271949	3.255170575841601	0	12	4.48777424957969	ENOG411CUSR	Xelaev18001094m.g, Xelaev18023980m.g, Xelaev18019680m.g	Xenbase_9.1	polr2a.S, Xelaev18023980m.g, polr2a.L	NA	P24928	POLR2A	POLR2	polymerase (RNA) II (DNA directed) polypeptide A	3.598556644717708e-6	3.8490161871900604e-4	TRUE	TRUE	TRUE
ENOG411CRYB	7	19	36	51	3.665260922996781	2.4259907693903964	1.7527446701797424	0.8263272770377267	13	43.5	4.307165377601007	ENOG411CRYB	Xelaev18002839m.g, Xelaev18041759m.g	Xenbase_9.1	huwe1.L, huwe1.S	NA	Q7Z6Z7	HUWE1	KIAA0312 KIAA1578 UREB1	HECT, UBA and WWE domain containing 1, E3 ubiquitin protein ligase	8.267998962819733e-6	8.503318933299986e-4	TRUE	TRUE	TRUE
ENOG411CUS7	6	14	26	49	2.8486662080766108	3.1961694040312953	1.4908238846566573	1.1847812479502031	10	37.5	4.274344252479435	ENOG411CUS7	Xelaev18014744m.g, Xelaev18012398m.g	Xenbase_9.1	usp9x.S, usp9x.L	NA	Q93008, O00507	USP9X, USP9Y	DFFRX FAM USP9, DFFRY	ubiquitin specific peptidase 9, X-linked	9.58503260821552e-6	9.492732294210481e-4	TRUE	TRUE	TRUE
ENOG411D16P	6	14	25	50	2.7284239207681815	3.2851028222295424	1.4363761006342806	1.213350400146974	10	37.5	4.252205538820343	ENOG411D16P	Xelaev18039175m.g	Xenbase_9.1	skiv2l.L	NA	Q15477	SKIV2L	DDX13 SKI2W SKIV2 W	superkiller viralicidic activity 2-like (S. cerevisiae	1.058377227726194e-5	0.0010107502524785152	TRUE	TRUE	TRUE
ENOG411CR0G	8	14	32	46	3.0083986427754925	2.9218887630142834	1.4177604224669338	1.0955139098531157	11	39	4.1933464390191295	ENOG411CR0G	148235299, Xelaev18035401m.g	GenBank, Xenbase_9.1	arcn1.L	archain 1 [Xenopus laevis], NA	P48444	ARCN1	COPD	Archain 1	1.3743458503573915e-5	0.0012672416565019534	TRUE	TRUE	TRUE
ENOG411CYEA	8	11	24	49	2.057713587779607	3.8091892800954916	1.0172224928832052	1.5067093428375653	9.5	36.5	4.148526802437285	ENOG411CYEA	147899700, 262176855, Xelaev18036194m.g	GenBank, Xenbase_9.1	pold1.L	DNA-directed DNA polymerase delta 1 [Xenopus laevis], DNA polymerase delta [Xenopus laevis], NA	P28340	POLD1	POLD	polymerase (DNA directed), delta 1, catalytic subunit	1.6731083765118187e-5	0.0014912972662642012	TRUE	TRUE	TRUE
ENOG411DGHH	71	107	146	220	2.8223928193180527	2.9380746466291208	0.5730386479448448	0.48083071101196	89	183	4.073265607975734	ENOG411DGHH	148227386, Xelaev18024169m.g	GenBank, Xenbase_9.1	pc.S	pyruvate carboxylase, gene 1 [Xenopus laevis], NA	P11498	PC	NA	Catalyzes a 2-step reaction, involving the ATP-dependent carboxylation of the covalently attached biotin in the first step and the transfer of the carboxyl group to pyruvate in the second	2.3179252216640235e-5	0.0019993974331385805	TRUE	TRUE	TRUE
ENOG411CX8K	2	1	13	16	2.4190657639703086	3.202611874605651	1.7656837258872404	2.5352784950343366	1.5	14.5	3.9751263798818384	ENOG411CX8K	157423663, 161611784, Xelaev18012918m.g, Xelaev18015491m.g	GenBank, Xenbase_9.1	ranbp2.L, ranbp2.S	LOC100126652 protein [Xenopus laevis], LOC100127327 protein [Xenopus laevis], NA	P49792, Q7Z3J3, A6NKT7, Q99666, O14715, P0DJD1, P0DJD0	RANBP2, RGPD4, RGPD3, RGPD5; RGPD6, RGPD8, RGPD2, RGPD1	NUP358, RGP4, RGP3, RANBP2L1 RGP5 RGP7 RGPD7; RANBP2L2 RGP6, RANBP2ALPHA RANBP2L1 RANBP2L3, RANBP2L2 RGP2, RANBP2L6 RGP1	RAN binding protein 2	3.517094634831824e-5	0.002938972204231343	TRUE	TRUE	TRUE
ENOG411CYUD	14	14	30	61	1.401341386853851	4.193173768067137	0.5905970193291493	1.4951213685623537	14	45.5	3.9559196034955386	ENOG411CYUD	148223539, 148223736	GenBank	NA	coatomer protein complex, subunit beta 1 [Xenopus laevis], uncharacterized protein LOC735158 [Xenopus laevis]	P53618	COPB1	COPB	The coatomer is a cytosolic protein complex that binds to dilysine motifs and reversibly associates with Golgi non- clathrin-coated vesicles, which further mediate biosynthetic protein transport from the ER, via the Golgi up to the trans Golgi network. Coatomer complex is required for budding from Golgi membranes, and is essential for the retrograde Golgi-to-ER transport of dilysine-tagged protei…	3.8120399932133784e-5	0.00300973853578152	TRUE	TRUE	TRUE
ENOG411CSQS	0	0	5	15	2.06316626569203	3.530034229156346	2.128253805271949	3.447815653783997	0	10	3.9549899984432395	ENOG411CSQS	10443732, 10443734, 10443736, 10443738, 10443740, 10443742, 10443744, 10443746, 11527142, 11527144, 11527146, 11527148, 11527150, 11527152, 11527154, 11527156, 11527158, 11527160, 11527162, 11527164, 11527166, 11527170, 11527172, 11527174, 11527176, 11527178, 11527180, 147907112, 148232260, 29124575, 49257872, 603213, Xelaev18037152m.g, Xelaev18009360m.g, Xelaev18020277m.g, Xelaev18034897m.g, Xel…	GenBank, Xenbase_9.1	camk2g.S, camk2d.S, Xelaev18020277m.g, camk2g.L, camk2d.L, camk2a.S, Xelaev18018622m.g	calcium/calmodulin-dependent protein kinase II delta12 subunit [Xenopus laevis], calcium/calmodulin-dependent protein kinase II gamma J subunit [Xenopus laevis], calcium/calmodulin-dependent protein kinase II gamma K subunit [Xenopus laevis], calcium/calmodulin-dependent protein kinase II gamma L subunit [Xenopus laevis], calcium/calmodulin-dependent protein kinase II gamma M subunit [Xenopus lae…	Q13555, Q13554, Q13557, Q9UQM7	CAMK2G, CAMK2B, CAMK2D, CAMK2A	CAMK CAMK-II CAMKG, CAM2 CAMK2 CAMKB, CAMKD, CAMKA KIAA0968	calcium calmodulin-dependent protein kinase II	3.8268926782562335e-5	0.00300973853578152	TRUE	TRUE	TRUE
ENOG411CS7N	18	35	49	88	2.6371933360254576	2.8835633665019795	0.9392199808819319	0.7536240833080822	26.5	68.5	3.9037645016382343	ENOG411CS7N	147904152, 148234316, Xelaev18008676m.g, Xelaev18041787m.g	GenBank, Xenbase_9.1	idh3b.S, idh3g.S	isocitrate dehydrogenase 3 (NAD+) gamma [Xenopus laevis], isocitrate dehydrogenase 3 (NAD+) beta [Xenopus laevis], NA	P51553, O43837	IDH3G, IDH3B	NA	Isocitrate dehydrogenase 3 (NAD)	4.735396986864135e-5	0.0036178432979641992	TRUE	TRUE	TRUE
ENOG411CW05	2	2	17	14	2.9964037417987583	2.5007383122794127	2.128253805271949	1.7697437486713592	2	15.5	3.8870664235844217	ENOG411CW05	115528674, 158564272, 47125206, 66911532, 80477530, Xelaev18003589m.g	GenBank, Xenbase_9.1	ctu2.L	Unknown (protein for MGC:154644) [Xenopus laevis], RecName: Full=Cytoplasmic tRNA 2-thiolation protein 2 B, LOC431806 protein [Xenopus laevis], Unknown (protein for IMAGE:6633620) [Xenopus laevis], NA	Q2VPK5	CTU2	C16orf84 NCS2	cytosolic thiouridylase subunit 2 homolog (S. pombe)	5.073149835144812e-5	0.0037682229608825626	TRUE	TRUE	TRUE
ENOG411CPDN	3	7	19	27	2.8981440240487735	2.565690942623771	1.8652193994381552	1.2551705758416012	5	23	3.86351475621833	ENOG411CPDN	147898917, 148225254, Xelaev18012670m.g	GenBank, Xenbase_9.1	aldh3a2.L	aldehyde dehydrogenase 3 family, member A2 [Xenopus laevis], uncharacterized protein LOC496316 [Xenopus laevis], NA	P51648, P30838	ALDH3A2, ALDH3A1	ALDH10 FALDH, ALDH3	Aldehyde dehydrogenase 3 family member	5.5883569164969895e-5	0.003999895975203893	TRUE	TRUE	TRUE
ENOG411CPSN	6	10	18	45	1.7818217789802384	3.6726165120891294	0.9838638959367741	1.5119459912037125	8	31.5	3.856870303178713	ENOG411CPSN	147903615, Xelaev18006059m.g, Xelaev18009608m.g	GenBank, Xenbase_9.1	polr2b.L, polr2b.S	polymerase (RNA) II (DNA directed) polypeptide B, 140kDa [Xenopus laevis], NA	P30876	POLR2B	NA	polymerase (RNA) II (DNA directed) polypeptide B, 140kDa	5.742402983967603e-5	0.003999895975203893	TRUE	TRUE	TRUE
ENOG411CQUN	1	10	13	34	2.85505085170683	2.593923771648875	2.3506462266083967	1.117667052091666	5.5	23.5	3.853006906688232	ENOG411CQUN	148227774, 3068759, Xelaev18036728m.g, Xelaev18000914m.g, Xelaev18019318m.g	GenBank, Xenbase_9.1	chd4.S, chd3.S, chd3.L	chromodomain helicase DNA binding protein 4 [Xenopus laevis], Mi-2 [Xenopus laevis], NA	Q14839, Q12873	CHD4, CHD3	NA	Chromodomain helicase DNA binding protein	5.8338049002599785e-5	0.003999895975203893	TRUE	TRUE	TRUE
ENOG411CS25	0	0	3	17	1.5980745634395823	3.758068848582514	1.5432913045507926	3.617740655226309	0	10	3.7873653276484767	ENOG411CS25	148225284, Xelaev18028714m.g, Xelaev18039876m.g, Xelaev18026190m.g	GenBank, Xenbase_9.1	ubr2.S, ubr1.L, ubr2.L	E3 ubiquitin-protein ligase UBR2 [Xenopus laevis], NA	Q8IWV8, Q8IWV7	UBR2, UBR1	C6orf133 KIAA0349, NA	Ubiquitin protein ligase E3 component n-recognin	7.612657961794562e-5	0.005089061847459665	TRUE	TRUE	TRUE
ENOG411CX19	0	10	16	26	3.691303124497838	1.65203293037971	3.630754145801132	0.7432715373101683	5	21	3.778309158562488	ENOG411CX19	117558145	GenBank	NA	LOC100036801 protein [Xenopus laevis]	Q9HCS7	XAB2	HCNP KIAA1177 SYF1	XPA binding protein 2	7.894839270470514e-5	0.005148975660789794	TRUE	TRUE	TRUE
ENOG411CYMZ	0	0	4	14	1.8453247825788208	3.4103096404455897	1.8652193994381552	3.3547062493925157	0	9	3.7162947399580086	ENOG411CYMZ	148228823, 148230665, Xelaev18031966m.g, Xelaev18033684m.g	GenBank, Xenbase_9.1	trappc8.L, trappc8.S	uncharacterized protein LOC432274 [Xenopus laevis], trafficking protein particle complex 8 [Xenopus laevis], NA	Q9Y2L5	TRAPPC8	KIAA1012	Trafficking protein particle complex 8	1.0108286735073173e-4	0.00643560922132992	TRUE	TRUE	TRUE
ENOG411CQ1P	0	0	7	9	2.441243282114779	2.7342208434957653	2.5432913045507926	2.769743748671359	0	8	3.659605779006921	ENOG411CQ1P	114108120, 116487694, 284925122, 33305500, 47507264, 54035254, 56474875, 77748230, Xelaev18006846m.g, Xelaev18003798m.g, Xelaev18000745m.g, Xelaev18004432m.g	GenBank, Xenbase_9.1	smarca2-like.L, smarca2-like.S, smarca4.S, smarca4.L	LOC432089 protein [Xenopus laevis], Unknown (protein for IMAGE:5078610) [Xenopus laevis], SWI/SNF related, matrix associated, actin dependent regulator of chromatin, subfamily a, member 4 [Xenopus laevis], BRM protein [Xenopus laevis], Unknown (protein for IMAGE:4202564) [Xenopus laevis], Brg1 [Xenopus laevis], Unknown (protein for IMAGE:7974916) [Xenopus laevis], NA	P51532, P51531	SMARCA4, SMARCA2	BAF190A BRG1 SNF2B SNF2L4, BAF190B BRM SNF2A SNF2L2	SWI SNF related matrix associated actin dependent regulator of chromatin subfamily a member	1.2630177779301475e-4	0.007752496026000032	TRUE	TRUE	TRUE
ENOG411CT03	0	0	2	18	1.3048031678308571	3.8670520386512717	1.1282538052719489	3.6957431672275822	0	10	3.6570538878184653	ENOG411CT03	Xelaev18034602m.g	Xenbase_9.1	btaf1-like.1.L	NA	O14981	BTAF1	TAF172	BTAF1 RNA polymerase II, B-TFIID transcription factor-associated, 170kDa (Mot1 homolog, S. cerevisiae)	1.2756537963500426e-4	0.007752496026000032	TRUE	TRUE	TRUE
ENOG411CTG2	0	5	8	22	2.609837352644535	2.5325642678336635	2.713216305993105	1.3864151091198536	2.5	15	3.6362270574248243	ENOG411CTG2	147900740, Xelaev18041175m.g, Xelaev18039718m.g	GenBank, Xenbase_9.1	eif5.S, eif5.L	eukaryotic translation initiation factor 5 [Xenopus laevis], NA	P55010	EIF5	NA	Eukaryotic translation initiation factor 5	1.3833024587031742e-4	0.008173468744565537	TRUE	TRUE	TRUE
ENOG411CU8S	0	1	5	15	2.06316626569203	3.0732856518210774	2.128253805271949	2.447815653783997	0.5	10	3.632019982112163	ENOG411CU8S	Xelaev18036694m.g, Xelaev18035703m.g, Xelaev18034330m.g	Xenbase_9.1	rimklb-like.S, rimkla.L, rimklb-like.L	NA	Q9ULI2, Q8IXN7	RIMKLB, RIMKLA	FAM80B KIAA1238, FAM80A	ribosomal modification protein rimK-like family member	1.4060567025056647e-4	0.008173468744565537	TRUE	TRUE	TRUE
ENOG411CQT9	9	7	24	33	1.7975659565657778	3.2304164770397876	0.8652193994381551	1.5352784950343363	8	28.5	3.555320474489335	ENOG411CQT9	147900249	GenBank	NA	probable 2-oxoglutarate dehydrogenase E1 component DHKTD1, mitochondrial precursor [Xenopus laevis]	Q96HY7	DHTKD1	KIAA1630	dehydrogenase E1 and transketolase domain containing 1	1.8875932427565845e-4	0.01073920070453427	TRUE	TRUE	FALSE
ENOG411D2E0	3	8	17	27	2.626784763563687	2.295709235296891	1.7132163059931051	1.0852455743992886	5.5	22	3.4807288869443993	ENOG411D2E0	148225843, Xelaev18008662m.g, Xelaev18003711m.g	GenBank, Xenbase_9.1	loc448531.S, loc448531.1.L	uncharacterized protein LOC379587 [Xenopus laevis], NA	NA	NA	NA	programmed cell death	2.500256835487708e-4	0.01392851412102944	TRUE	TRUE	FALSE
ENOG411CVHA	0	1	6	12	2.260118752373529	2.651061252712575	2.3506462266083967	2.148255371925089	0.5	9	3.4727286852241668	ENOG411CVHA	148233082, 2102675, 50417530, Xelaev18039657m.g	GenBank, Xenbase_9.1	wdhd1.L	WD repeat and HMG-box DNA-binding protein 1 [Xenopus laevis], AND-1 protein [Xenopus laevis], Wdhd1 protein [Xenopus laevis], NA	O75717	WDHD1	AND1	WD repeat and HMG-box DNA binding protein 1	2.575979433568266e-4	0.013939425726909321	TRUE	TRUE	FALSE
ENOG411CSFD	0	2	4	18	1.8453247825788208	3.052059554515237	1.8652193994381552	2.110780666506426	1	11	3.462973674835993	ENOG411CSFD	1334661, 147903139, 148229787, 391931	GenBank	NA	NAD(+) ADP-ribosyltransferase [Xenopus laevis], poly [ADP-ribose] polymerase 1 [Xenopus laevis], uncharacterized protein LOC734426 [Xenopus laevis], poly(ADP-ribose) polymerase [Xenopus laevis]	P09874	PARP1	ADPRT PPOL	Poly (ADP-ribose) polymerase 1	2.671203307970983e-4	0.013939425726909321	TRUE	TRUE	FALSE
ENOG411CUPZ	14	19	31	62	1.5233295783228973	3.3700419309431013	0.6364007089422741	1.1031674823965512	16.5	46.5	3.460136177067038	ENOG411CUPZ	148224016, Xelaev18008065m.g	GenBank, Xenbase_9.1	ttc37.L	tetratricopeptide repeat protein 37 [Xenopus laevis], NA	Q6PGP7	TTC37	KIAA0372	Tetratricopeptide repeat domain 37	2.6995113763831556e-4	0.013939425726909321	TRUE	TRUE	FALSE
ENOG411D0BQ	11	22	35	55	2.632581195777857	2.2573125866004182	1.1282538052719489	0.7316086197845882	16.5	45	3.4576770528016136	ENOG411D0BQ	148228541, 148228545, 1753195	GenBank	NA	DNA replication licensing factor mcm5-A [Xenopus laevis], DNA replication licensing factor mcm5-B [Xenopus laevis], xCDC46 [Xenopus laevis]	P33992	MCM5	CDC46	Minichromosome maintenance complex component 5	2.7242704594147214e-4	0.013939425726909321	TRUE	TRUE	FALSE
ENOG411DF1I	8	26	33	57	3.1157026426395444	1.7688286117930112	1.46082914435882	0.5509091467481004	17	45	3.4538851729268933	ENOG411DF1I	161169050, Xelaev18021771m.g, Xelaev18024574m.g	GenBank, Xenbase_9.1	eif4g2.L, eif4g2.S	eIF4G-related protein NAT1 [Xenopus laevis], NA	NA	NA	NA	Eukaryotic translation initiation factor 4 gamma	2.762862990000726e-4	0.013939425726909321	TRUE	TRUE	FALSE
ENOG411CW4Z	4	6	15	27	1.9701250521105542	2.8442930746065205	1.2213632096634304	1.447815653783997	5	21	3.4043077048690784	ENOG411CW4Z	147901444, 148233978, Xelaev18010300m.g, Xelaev18009673m.g, Xelaev18007338m.g	GenBank, Xenbase_9.1	dnaja4.1.S, dnaja1.S, dnaja4.1.L	DnaJ (Hsp40) homolog, subfamily A, member 4, gene 1 [Xenopus laevis], DnaJ (Hsp40) homolog, subfamily A, member 1 [Xenopus laevis], NA	P31689, Q8WW22	DNAJA1, DNAJA4	DNAJ2 HDJ2 HSJ2 HSPF4, NA	DnaJ (Hsp40) homolog, subfamily A, member	3.316599275957935e-4	0.016423308266502814	TRUE	TRUE	FALSE
ENOG411DGCS	3	5	13	24	2.0138354885729064	2.7822563016517243	1.3506462266083967	1.5067093428375653	4	18.5	3.391349028060965	ENOG411DGCS	148234283, Xelaev18016099m.g, Xelaev18013645m.g	GenBank, Xenbase_9.1	lima1.S, lima1.L	LIM domain and actin binding 1 [Xenopus laevis], NA	NA	NA	NA	LIM domain and actin binding 1	3.4774734296667234e-4	0.016629345739239184	TRUE	TRUE	FALSE
ENOG411D0UW	5	20	22	50	2.643380605707928	2.152141847833397	1.4818907598866495	0.7279235729767322	12.5	36	3.390946446231421	ENOG411D0UW	12004636, 148225893, Xelaev18023992m.g	GenBank, Xenbase_9.1	ruvbl1.L	pontin [Xenopus laevis], ruvB-like 1 [Xenopus laevis], NA	Q9Y265	RUVBL1	INO80H NMP238 TIP49 TIP49A	RuvB-like 1 (E. coli)	3.4825854951286246e-4	0.016629345739239184	TRUE	TRUE	FALSE
ENOG411D2BD	3	9	14	31	2.1775576609050074	2.506055205954659	1.4501819001593113	1.1258875588966346	6	22.5	3.311814418609037	ENOG411D2BD	148232822, Xelaev18039164m.g, Xelaev18042446m.g	GenBank, Xenbase_9.1	crat.2.L, crat.2.S	carnitine O-acetyltransferase, gene 2 [Xenopus laevis], NA	NA	NA	NA	Choline/Carnitine o-acyltransferase	4.634650668528924e-4	0.021742203311660248	TRUE	TRUE	FALSE
ENOG411CZHU	0	0	3	11	1.5980745634395823	3.0228434866016407	1.5432913045507926	3.032778154505153	0	7	3.267482488491467	ENOG411CZHU	62825931, Xelaev18033190m.g, Xelaev18031131m.g	GenBank, Xenbase_9.1	dnajc13.S, dnajc13.L	LOC733226 protein [Xenopus laevis], NA	O75165	DNAJC13	KIAA0678 RME8	DnaJ (Hsp40) homolog, subfamily C, member 13	5.425428952269815e-4	0.024932868981597096	TRUE	TRUE	FALSE
ENOG411DFJY	12	38	41	76	3.0332434760136886	1.582114625533387	1.2351690091884608	0.42919997561664985	25	58.5	3.263551011208207	ENOG411DFJY	Xelaev18036528m.g, Xelaev18008638m.g, Xelaev18036527m.g, Xelaev18036484m.g, Xelaev18038039m.g, Xelaev18038036m.g, Xelaev18036478m.g, Xelaev18036482m.g, Xelaev18004212m.g, Xelaev18036483m.g	Xenbase_9.1	loc100488805.L, loc100489882.L, loc100488642.L, fcgbp.L, fcgbp.S, Xelaev18038036m.g, loc101735028.L, Xetrov90019630m.L, loc100495886.1.S, Xelaev18036483m.g	NA	NA	NA	NA	Fc fragment of IgG binding protein	5.501268773052463e-4	0.024932868981597096	TRUE	TRUE	FALSE
ENOG411CSB2	0	2	6	13	2.260118752373529	2.3473950397430325	2.3506462266083967	1.670208075120445	1	9.5	3.258004246816165	ENOG411CSB2	Xelaev18005064m.g	Xenbase_9.1	htt.L	NA	P42858	HTT	HD IT15	huntingtin	5.609936361970158e-4	0.025001616386513673	TRUE	TRUE	FALSE
ENOG411CWPX	5	9	15	35	1.6264772663191724	2.939260570304346	0.9583288038296363	1.2958125603389468	7	25	3.228464185396487	ENOG411CWPX	Xelaev18036480m.g, Xelaev18036509m.g, Xelaev18038037m.g	Xenbase_9.1	loc100493184.L, loc100492852.L, loc100492852.S	NA	NA	NA	NA	Fc fragment of IgG binding protein	6.222842098616235e-4	0.027278491429016085	TRUE	TRUE	FALSE
ENOG411DG9T	22	31	56	68	2.581089085617938	1.9348334146686101	0.8526193626585215	0.5563401105621659	26.5	62	3.1932394232655263	ENOG411DG9T	126631290, 1311667, 141795861, 147902700, 148236917, 157831120, 161611711, 28839627, 50416449, 83405227, Xelaev18004555m.g, Xelaev18001532m.g, Xelaev18028159m.g, Xelaev18004556m.g, Xelaev18030159m.g	GenBank, Xenbase_9.1	Xelaev18004555m.g, Xelaev18001532m.g, loc101731153.L, loc100487577-like.1.S, loc101731153.S	Xnf7 protein [Xenopus laevis], nuclear factor 7 [Xenopus laevis], Unknown (protein for IMAGE:8527468) [Xenopus laevis], nuclear factor 7, brain [Xenopus laevis], tripartite motif containing 62 [Xenopus laevis], Chain A, Xnf7 Bbox, Developmental Protein, Ph 7.5, 30 C, With Zinc, Nmr, 1 Structure, MGC52568 protein [Xenopus laevis], Rnf36 protein [Xenopus laevis], Unknown (protein for IMAGE:4202738)…	NA	NA	NA	tripartite motif containing 69	7.034312335569703e-4	0.03033830836340869	TRUE	TRUE	FALSE
ENOG411CSWI	4	15	15	44	1.9701250521105542	2.5295595655147123	1.2213632096634304	0.9396687501136716	9.5	29.5	3.181757506323623	ENOG411CSWI	124481854	GenBank	NA	LOC100037132 protein [Xenopus laevis]	Q5VYK3	ECPAS	ECM29 KIAA0368	kiaa0368	7.319216335718624e-4	0.031066007113827936	TRUE	TRUE	FALSE
ENOG411DG9U	6	11	22	32	2.3474581302502724	2.1355384962054216	1.2594983385502014	0.9072472724212941	8.5	27	3.1699573146032374	ENOG411DG9U	147902571, Xelaev18035836m.g, Xelaev18037633m.g	GenBank, Xenbase_9.1	trim28.L, trim28.S	tripartite motif containing 28 [Xenopus laevis], NA	Q13263	TRIM28	KAP1 RNF96 TIF1B	Nuclear corepressor for KRAB domain-containing zinc finger proteins (KRAB-ZFPs). Mediates gene silencing by recruiting CHD3, a subunit of the nucleosome remodeling and deacetylation (NuRD) complex, and SETDB1 (which specifically methylates histone H3 at 'Lys-9' (H3K9me)) to the promoter regions of KRAB target genes. Enhances transcriptional repression by coordinating the increase in H3K9me, the d…	7.623066648180951e-4	0.031557091419047265	TRUE	TRUE	FALSE
ENOG411CYZK	1	6	10	21	2.3861234292826206	2.0917781298287816	2.00272292318809	1.0998923503636902	3.5	15.5	3.1663545579334857	ENOG411CYZK	Xelaev18027532m.g, Xelaev18029670m.g	Xenbase_9.1	opa1.L, opa1.S	NA	O60313	OPA1	KIAA0567	Optic atrophy 1 (Autosomal dominant)	7.718125862125612e-4	0.031557091419047265	TRUE	TRUE	FALSE
ENOG411CWBH	9	12	20	45	1.231830241137596	3.2423121030911646	0.6136806324421906	1.2709378916999174	10.5	32.5	3.163696391598033	ENOG411CWBH	126631432, 147905570, 67678082, Xelaev18042639m.g, Xelaev18040034m.g, Xelaev18026612m.g, Xelaev18028863m.g	GenBank, Xenbase_9.1	sec23a.S, sec23a.L, sec23b.L, sec23b.S	Unknown (protein for IMAGE:6939089) [Xenopus laevis], Sec23 homolog B [Xenopus laevis], LOC779038 protein [Xenopus laevis], NA	Q15436, Q15437	SEC23A, SEC23B	NA	S. cerevisiae	7.788960484880775e-4	0.031557091419047265	TRUE	TRUE	FALSE
ENOG411CSY2	0	2	7	11	2.441243282114779	2.015892331849103	2.5432913045507926	1.447815653783997	1	9	3.1516708173019263	ENOG411CSY2	147903417	GenBank	NA	tRNA-dihydrouridine synthase 3-like [Xenopus laevis]	Q96G46, K7EMI3	DUS3L, NA	NA	Dihydrouridine synthase 3-like (S. cerevisiae)	8.116958840067474e-4	0.032395146176627504	TRUE	TRUE	FALSE
ENOG411CP76	4	9	14	32	1.8065626587262802	2.6176992977209275	1.1282538052719489	1.170281678255088	6.5	23	3.1284256311494816	ENOG411CP76	125693, 125694, 147906429, Xelaev18042263m.g, Xelaev18029088m.g, Xelaev18038924m.g, Xelaev18015064m.g	GenBank, Xenbase_9.1	rps6ka6.S, rps6ka2.S, rps6ka6.L, rps6ka1.S	RecName: Full=Ribosomal protein S6 kinase 2 alpha; AltName: Full=MAP kinase-activated protein kinase 1; Short=MAPK-activated protein kinase 1; Short=MAPKAP kinase 1; Short=MAPKAPK-1; AltName: Full=Ribosomal protein S6 kinase II alpha; Short=S6KII-alpha; AltName: Full=p90-RSK, RecName: Full=Ribosomal protein S6 kinase 2 beta; AltName: Full=Ribosomal protein S6 kinase II beta; Short=S6KII-beta; Alt…	Q15418, Q15349, Q9UK32	RPS6KA1, RPS6KA2, RPS6KA6	MAPKAPK1A RSK1, MAPKAPK1C RSK3, RSK4	Ribosomal protein S6 kinase, 90kDa, polypeptide	8.787273964054528e-4	0.034554662617473246	TRUE	TRUE	FALSE
ENOG411CQZV	1	2	9	12	2.210753139971888	2.1861716231365547	1.8652193994381552	1.563292871203933	1.5	10.5	3.1090953163610338	ENOG411CQZV	148229908, Xelaev18016920m.g, Xelaev18020036m.g	GenBank, Xenbase_9.1	dctn4.L, dctn4.S	dynactin 4 (p62) [Xenopus laevis], NA	Q9UJW0	DCTN4	NA	Dynactin 4 (P62)	9.383058349035049e-4	0.03547322884846983	TRUE	TRUE	FALSE
ENOG411CZUT	0	1	5	10	2.06316626569203	2.3323531750776914	2.128253805271949	1.907247272421294	0.5	7.5	3.108101603405571	ENOG411CZUT	147904611, 148237558, Xelaev18045947m.g, Xelaev18030801m.g	GenBank, Xenbase_9.1	lasp1.S, nebl-like.1.L	LIM and SH3 protein 1 [Xenopus laevis], NA	Q14847	LASP1	MLN50	LIM and SH3 protein 1	9.414666123306932e-4	0.03547322884846983	TRUE	TRUE	FALSE
ENOG411DDF5	6	2	12	23	0.7521771000947303	3.641479041267805	0.4363761006342806	2.447815653783997	4	17.5	3.1067840517593686	ENOG411DDF5	Xelaev18022246m.g, Xelaev18024207m.g, Xelaev18028932m.g	Xenbase_9.1	ahnak.L, ahnak-like.S, loc101735110.S	NA	NA	NA	NA	NA	9.456725283464585e-4	0.03547322884846983	TRUE	TRUE	FALSE
ENOG411CU2D	0	7	12	17	3.196573579144807	1.1929113837384162	3.2437310226918847	0.6177406552263094	3.5	14.5	3.103834583171108	ENOG411CU2D	148237932	GenBank	NA	aldehyde dehydrogenase 18 family, member A1 [Xenopus laevis]	P54886	ALDH18A1	GSAS P5CS PYCS	Aldehyde dehydrogenase 18 family, member A1	9.551505149924562e-4	0.03547322884846983	TRUE	TRUE	FALSE
ENOG411CYGN	2	4	10	19	1.9053346151939878	2.4611887685601666	1.4177604224669338	1.4478156537839968	3	14.5	3.087598294862192	ENOG411CYGN	10998388, 147900383, 47939988	GenBank	NA	ubiquitin fusion degradation 1-like protein [Xenopus laevis], ubiquitin fusion degradation protein 1 homolog [Xenopus laevis], Unknown (protein for MGC:82436) [Xenopus laevis]	Q92890	UFD1	UFD1L	Ubiquitin fusion degradation 1 like (Yeast)	0.0010089051364865244	0.03695633335568447	TRUE	TRUE	FALSE
ENOG411CQNX	0	2	6	11	2.260118752373529	2.015892331849103	2.3506462266083967	1.447815653783997	1	8.5	3.0235964340826644	ENOG411CQNX	Xelaev18016323m.g, Xelaev18007746m.g, Xelaev18014073m.g	Xenbase_9.1	piwil4.S, piwil1.L, piwil3.L	NA	Q96J94, Q7Z3Z4	PIWIL1, PIWIL4	HIWI, HIWI2 PIWI	piwi-like	0.0012489470237847962	0.04513086948108845	TRUE	TRUE	FALSE
ENOG411CSPX	0	2	5	12	2.06316626569203	2.1861716231365547	2.128253805271949	1.563292871203933	1	8.5	3.0047356367436198	ENOG411CSPX	148231575, Xelaev18007003m.g	GenBank, Xenbase_9.1	sptlc1.L	serine palmitoyltransferase, long chain base subunit 1 [Xenopus laevis], NA	O15269	SPTLC1	LCB1	serine palmitoyltransferase, long chain base subunit 1	0.0013290588661986973	0.047385378776204225	TRUE	TRUE	FALSE
ENOG411CQ39	4	11	12	38	1.4546796099312627	2.7820770896386757	0.9218029278045223	1.1482553719250892	7.5	25	2.9958393925034397	ENOG411CQ39	148228342, Xelaev18002032m.g, Xelaev18019805m.g, Xelaev18002475m.g	GenBank, Xenbase_9.1	Xelaev18002032m.g, Xelaev18019805m.g, Xelaev18002475m.g	nucleoporin 205kDa [Xenopus laevis], NA	Q92621	NUP205	C7orf14 KIAA0225	nucleoporin 205kDa	0.0013684527172428294	0.0481479284987806	TRUE	TRUE	FALSE
ENOG411CYVX	1	11	9	31	2.210753139971888	2.020124163950153	1.8652193994381552	0.8628531530628408	6	20	2.9916820319715325	ENOG411CYVX	148225618, 148233489, Xelaev18007794m.g, Xelaev18010617m.g	GenBank, Xenbase_9.1	hip1r.L, hip1r.S	huntingtin interacting protein 1 related [Xenopus laevis], uncharacterized protein LOC432028 [Xenopus laevis], NA	O75146	HIP1R	HIP12 KIAA0655	Huntingtin interacting protein 1 related	0.0013872253717668208	0.04817455381953869	TRUE	TRUE	FALSE
ENOG411CXHY	0	1	5	9	2.06316626569203	2.157958478269589	2.128253805271949	1.7697437486713592	0.5	7	2.98478593068959	ENOG411CXHY	148232088, Xelaev18034689m.g, Xelaev18004498m.g, Xelaev18037083m.g	GenBank, Xenbase_9.1	Xelaev18034689m.g, Xelaev18004498m.g, Xelaev18037083m.g	MMS19 nucleotide excision repair homolog [Xenopus laevis], NA	Q96T76	MMS19	MMS19L	MMS19 nucleotide excision repair homolog (S. cerevisiae)	0.0014188842149446886	0.04818397357531892	TRUE	TRUE	FALSE
ENOG411CYM3	5	9	17	29	1.9443600912853862	2.2753485929245034	1.1282538052719489	1.032778154505153	7	23	2.9837846252365763	ENOG411CYM3	147902002, 163915947, Xelaev18002646m.g	GenBank, Xenbase_9.1	ddx4.S	probable ATP-dependent RNA helicase DDX4 [Xenopus laevis], Unknown (protein for IMAGE:8328523) [Xenopus laevis], NA	Q9NQI0	DDX4	VASA	DEAD (Asp-Glu-Ala-Asp) box polypeptide 4	0.0014235354945587864	0.04818397357531892	TRUE	TRUE	FALSE
ENOG411CPI8	4	8	12	31	1.4546796099312627	2.7587748572173365	0.9218029278045223	1.2778906523416844	6	21.5	2.9793622259415256	ENOG411CPI8	147902798, 147902836, 148234020, Xelaev18037288m.g, Xelaev18027561m.g	GenBank, Xenbase_9.1	mfn2.S, mfn1.L	mitofusin 2 [Xenopus laevis], MGC80345 protein [Xenopus laevis], mitofusin 1 [Xenopus laevis], NA	O95140, Q8IWA4	MFN2, MFN1	CPRP1 KIAA0214, NA	mitofusin	0.0014442454703156625	0.048273904845301016	TRUE	TRUE	FALSE
ENOG411CR61	8	13	21	40	1.6472405090050597	2.546711899468561	0.8327979217457777	0.9980127363444766	10.5	30.5	2.9655721880053503	ENOG411CR61	148231213, Xelaev18008414m.g, Xelaev18011061m.g	GenBank, Xenbase_9.1	nars.L, nars.S	asparaginyl-tRNA synthetase [Xenopus laevis], NA	O43776	NARS	NA	Asparaginyl-tRNA synthetase	0.0015106021629511428	0.04968371145634789	TRUE	TRUE	FALSE
ENOG411CZFZ	3	12	12	36	1.8415805784241341	2.348648075597552	1.243731022691885	0.9568293012718545	7.5	24	2.962939095980914	ENOG411CZFZ	125858590	GenBank	NA	LOC100037192 protein [Xenopus laevis]	Q92499	DDX1	NA	DEAD (Asp-Glu-Ala-Asp) box helicase 1	0.0015235842705387161	0.04968371145634789	TRUE	TRUE	FALSE
ENOG411CPNI	2	5	10	20	1.9053346151939878	2.2672659702307243	1.4177604224669338	1.2551705758416012	3.5	15	2.950474169136772	ENOG411CPNI	124481862, 148222140, 50414577, Xelaev18039864m.g, Xelaev18041091m.g	GenBank, Xenbase_9.1	rpap1.L, rpap1.S	LOC445849 protein [Xenopus laevis], RNA polymerase II associated protein 1 [Xenopus laevis], NA	Q9BWH6	RPAP1	KIAA1403	RNA polymerase II associated protein 1	0.00158643287052677	0.05110989753962148	TRUE	FALSE	FALSE
ENOG411CWD9	8	14	22	40	1.7880967227116062	2.3353624452966644	0.8969282591654935	0.8984770627935621	11	31	2.9157259396444877	ENOG411CWD9	Xelaev18045445m.g, Xelaev18047705m.g	Xenbase_9.1	trap1.L, trap1.S	NA	Q12931	TRAP1	HSP75	TNF receptor-associated protein 1	0.0017743103149344345	0.056482211692079495	TRUE	FALSE	FALSE
ENOG411CUH0	3	7	14	22	2.1775576609050074	1.9316124000473243	1.4501819001593113	0.9713776098410097	5	18	2.9056220151481327	ENOG411CUH0	118763688, 124481818, 148237982, 54311422, Xelaev18028620m.g, Xelaev18039316m.g	GenBank, Xenbase_9.1	adck3.S, adck4.L	LOC495397 protein [Xenopus laevis], LOC100037137 protein [Xenopus laevis], aarF domain containing kinase 4 [Xenopus laevis], NA	Q8NI60, Q96D53	COQ8A, COQ8B	ADCK3 CABC1, ADCK4	AarF domain containing kinase	0.0018326195764482335	0.05765205585203031	TRUE	FALSE	FALSE
ENOG411CT43	0	2	5	11	2.06316626569203	2.015892331849103	2.128253805271949	1.447815653783997	1	8	2.884329995178623	ENOG411CT43	50417416, Xelaev18026056m.g, Xelaev18028820m.g	GenBank, Xenbase_9.1	plcb4.L, plcb4.S	LOC445848 protein [Xenopus laevis], NA	Q15147	PLCB4	NA	phospholipase C, beta 4	0.001961237410205857	0.06098080040570304	TRUE	FALSE	FALSE
ENOG411CRP2	15	31	44	61	2.7223338028042856	1.3413892793444007	1.0351444008804673	0.4020119641708722	23	52.5	2.8734861482516334	ENOG411CRP2	125858818, 148224478, 148233454, 148236307, 148237986, 153792559, 160333793, 1841845, 49255965, 56388563, Xelaev18005061m.g, Xelaev18040188m.g, Xelaev18002165m.g, Xelaev18044721m.g, Xelaev18005060m.g, Xelaev18034758m.g, Xelaev18044723m.g, Xelaev18037024m.g	GenBank, Xenbase_9.1	Xelaev18005061m.g, loc100485391-like.L, loc100485391-like.1, Xelaev18044721m.g, loc100145536.L, itln1.L, Xelaev18044723m.g, loc100127565.S	LOC398308 protein [Xenopus laevis], 35 kDa serum lectin precursor [Xenopus laevis], intelectin 2 [Xenopus laevis], intelectin 1 (galactofuranose binding) precursor [Xenopus laevis], lectin type 2 precursor [Xenopus laevis], uncharacterized protein LOC100101274 precursor [Xenopus laevis], egg cortical granule lectin precursor [Xenopus laevis], lectin [Xenopus laevis], Unknown (protein for MGC:7992…	Q8WWU7, Q8WWA0	ITLN2, ITLN1	NA, INTL ITLN LFR	Intelectin 1 (Galactofuranose binding)	0.002029844400346586	0.06238855087961805	TRUE	FALSE	FALSE
ENOG411CXFT	0	0	3	7	1.5980745634395823	2.411317352187284	1.5432913045507926	2.447815653783997	0	5	2.835068211974279	ENOG411CXFT	148233806, Xelaev18008343m.g, Xelaev18008344m.g	GenBank, Xenbase_9.1	Xelaev18008343m.g, c9.L	complement component 9 precursor [Xenopus laevis], NA	P02748	C9	NA	Complement component 9	0.00229079510510378	0.0690313591929845	TRUE	FALSE	FALSE
ENOG411CY7P	19	31	32	87	0.6400161604190953	3.368034867992238	0.2657573290218838	0.9072472724212941	25	59.5	2.834120061531369	ENOG411CY7P	148230798, Xelaev18040643m.g, Xelaev18042803m.g	GenBank, Xenbase_9.1	copa.L, copa.S	coatomer protein complex, subunit alpha [Xenopus laevis], NA	P53621	COPA	NA	Coatomer protein complex subunit alpha	0.002297603204254159	0.0690313591929845	TRUE	FALSE	FALSE
ENOG411CRQ4	3	9	15	24	2.333755438042055	1.6481171608036043	1.5432913045507926	0.7697437486713592	6	19.5	2.8156091164646666	ENOG411CRQ4	148237916, Xelaev18027479m.g, Xelaev18029610m.g	GenBank, Xenbase_9.1	lpp.L, lpp.S	LIM domain containing preferred translocation partner in lipoma [Xenopus laevis], NA	Q93052, Q15654	LPP, TRIP6	NA, OIP1	LIM domain containing preferred translocation partner in lipoma	0.002434243050496803	0.07232406574476057	TRUE	FALSE	FALSE
ENOG411CQD2	6	9	19	27	1.9304371167273096	2.0337925575658544	1.057864477380551	0.9332424809542387	7.5	23	2.8031336848736346	ENOG411CQD2	148226320, Xelaev18034833m.g, Xelaev18017162m.g, Xelaev18021484m.g, Xelaev18037093m.g	GenBank, Xenbase_9.1	p4ha1-like.1.L, p4ha2.L, p4ha2.S, p4ha1-like.1.S	prolyl 4-hydroxylase, alpha polypeptide 2 precursor [Xenopus laevis], NA	P13674, O15460	P4HA1, P4HA2	P4HA, NA	Prolyl 4-hydroxylase, alpha polypeptide	0.0025304343437003657	0.07435583994565689	TRUE	FALSE	FALSE
ENOG411CT94	1	0	2	16	0.3070070547330004	3.6458329913627416	0.12825380527194893	3.5352784950343366	0.5	9	2.795080001540044	ENOG411CT94	21396416, 237511151, Xelaev18012788m.g, Xelaev18030942m.g, Xelaev18044708m.g, Xelaev18046776m.g, Xelaev18047178m.g	GenBank, Xenbase_9.1	loc101730961.L, dnah11.L, dnah11-like.2.L, dnah9.S, dnah11-like.2.S	dynein heavy chain 9 [Xenopus laevis], dynein axonemal heavy chain 11 [Xenopus laevis], NA	Q9NYC9, Q96DT5, Q9UFH2	DNAH9, DNAH11, DNAH17	DNAH17L DNAL1 KIAA0357, NA, DNAHL1 DNEL2	Dynein, axonemal heavy chain	0.0025943436635732617	0.07476337484539324	TRUE	FALSE	FALSE
ENOG411CTTX	4	29	26	49	3.4218331851769985	0.5299720085106305	1.9762507118268988	0.184781247950203	16.5	37.5	2.79434825038474	ENOG411CTTX	116487829, 148234261, 159155359, Xelaev18013238m.g, Xelaev18005568m.g	GenBank, Xenbase_9.1	naa16-like.L, naa15.L	Narg1l protein [Xenopus laevis], putative N-terminal acetyltransferase [Xenopus laevis], NA	Q9BXJ9, Q6N069	NAA15, NAA16	GA19 NARG1 NATH TBDN100, NARG1L NAT2	NatA auxiliary subunit	0.002600222086993856	0.07476337484539324	TRUE	FALSE	FALSE
ENOG411CXK8	1	0	5	8	1.3471557549751167	2.5778274065961155	1.1282538052719489	2.617740655226309	0.5	6.5	2.7753822095900325	ENOG411CXK8	148922158, Xelaev18046718m.g	GenBank, Xenbase_9.1	srp68.S	LOC100101323 protein [Xenopus laevis], NA	Q9UHB9	SRP68	NA	Signal-recognition-particle assembly has a crucial role in targeting secretory proteins to the rough endoplasmic reticulum membrane (By similarity)	0.0027568433997780316	0.07842339628730273	TRUE	FALSE	FALSE
ENOG411CQ6Z	1	3	7	14	1.8191648725954959	2.0916979266519244	1.5432913045507926	1.3547062493925155	2	10.5	2.765397605638054	ENOG411CQ6Z	147904048, Xelaev18013592m.g	GenBank, Xenbase_9.1	aaas.L	Aladin [Xenopus laevis], NA	Q9NRG9	AAAS	ADRACALA	Achalasia, adrenocortical insufficiency, alacrimia	0.0028426725465117656	0.08001375146707854	TRUE	FALSE	FALSE
ENOG411CT71	0	0	4	5	1.8453247825788208	2.0379023504666143	1.8652193994381552	2.032778154505153	0	4.5	2.7458562386640226	ENOG411CT71	Xelaev18035193m.g	Xenbase_9.1	mtor.L	NA	P42345	MTOR	FRAP FRAP1 FRAP2 RAFT1 RAPT1	mechanistic target of rapamycin (serine threonine kinase)	0.0030176601939585763	0.08244494027191071	TRUE	FALSE	FALSE
ENOG411CRQB	0	0	4	5	1.8453247825788208	2.0379023504666143	1.8652193994381552	2.032778154505153	0	4.5	2.7458562386640226	ENOG411CRQB	148229264, Xelaev18047424m.g	GenBank, Xenbase_9.1	zc3h15.S	zinc finger CCCH domain-containing protein 15 [Xenopus laevis], NA	Q8WU90	ZC3H15	DFRP1 LEREPO4	Zinc finger CCCH-type containing 15	0.0030176601939585763	0.08244494027191071	TRUE	FALSE	FALSE
ENOG411CPVM	0	0	2	8	1.3048031678308571	2.5778274065961155	1.1282538052719489	2.617740655226309	0	5	2.7454344080195323	ENOG411CPVM	Xelaev18033349m.g	Xenbase_9.1	elp2.S	NA	Q6IA86	ELP2	STATIP1	elongator acetyltransferase complex subunit 2	0.003021542313630236	0.08244494027191071	TRUE	FALSE	FALSE
ENOG411CZEP	8	17	23	42	1.9248271202603935	1.933038753677632	0.9583288038296366	0.7041554070437824	12.5	32.5	2.727923120369744	ENOG411CZEP	148228961, 148236079, Xelaev18019761m.g, Xelaev18016698m.g	GenBank, Xenbase_9.1	dnm1l.S, dnm1l.L	dynamin 1-like [Xenopus laevis], similar to dynamin 1-like [Xenopus laevis], NA	O00429	DNM1L	DLP1 DRP1	Dynamin 1-like	0.003186723010931753	0.08607371041647988	TRUE	FALSE	FALSE
ENOG411CZU7	10	13	23	39	1.4081220569314088	2.4446290943146596	0.6688221866346518	0.9623888266137554	11.5	31	2.724306465270373	ENOG411CZU7	147901681, 148225510, Xelaev18035380m.g	GenBank, Xenbase_9.1	trim29.L	tripartite motif containing 29 [Xenopus laevis], MGC80203 protein [Xenopus laevis], NA	Q14134	TRIM29	ATDC	tripartite motif containing 29	0.0032218341668452995	0.0861518456214433	TRUE	FALSE	FALSE
ENOG411CU34	0	1	5	7	2.06316626569203	1.7681752766489778	2.128253805271949	1.447815653783997	0.5	6	2.7091675856310524	ENOG411CU34	148232602, 148234478, Xelaev18030046m.g	GenBank, Xenbase_9.1	trappc12.S	tetratricopeptide repeat domain 15 [Xenopus laevis], uncharacterized protein LOC414531 [Xenopus laevis], NA	Q8WVT3	TRAPPC12	TRAMM TTC15	trafficking protein particle complex 12	0.003372612970786637	0.0872566482744574	TRUE	FALSE	FALSE
ENOG411CQTX	0	1	5	7	2.06316626569203	1.7681752766489778	2.128253805271949	1.447815653783997	0.5	6	2.7091675856310524	ENOG411CQTX	Xelaev18035954m.g, Xelaev18037724m.g	Xenbase_9.1	arhgef1.L, arhgef1.S	NA	Q92888	ARHGEF1	NA	Rho guanine nucleotide exchange factor (GEF) 1	0.003372612970786637	0.0872566482744574	TRUE	FALSE	FALSE
ENOG411D36N	0	0	3	6	1.5980745634395823	2.232428122919567	1.5432913045507926	2.255170575841601	0	4.5	2.7085744248778414	ENOG411D36N	Xelaev18027459m.g, Xelaev18029623m.g	Xenbase_9.1	tctex1d2.L, tctex1d2.S	NA	Q8WW35	TCTEX1D2	NA	Tctex1 domain containing 2	0.0033786477299378535	0.0872566482744574	TRUE	FALSE	FALSE
ENOG411CVRS	1	0	6	6	1.5959913177930014	2.232428122919567	1.3506462266083967	2.255170575841601	0.5	6	2.7071013477542665	ENOG411CVRS	Xelaev18038396m.g, Xelaev18041601m.g	Xenbase_9.1	tsc1.L, tsc1.S	NA	Q92574	TSC1	KIAA0243 TSC	Tuberous sclerosis 1	0.003393676671856234	0.0872566482744574	TRUE	FALSE	FALSE
ENOG411CV4T	0	1	4	8	1.8453247825788208	1.970867357354635	1.8652193994381552	1.6177406552263094	0.5	6	2.6984553404577487	ENOG411CV4T	1169421, 49257324	GenBank	NA	RecName: Full=Developmentally-regulated GTP-binding protein 1; Short=DRG-1; Short=xDRG, Xdrg protein [Xenopus laevis]	Q9Y295	DRG1	NEDD3	developmentally regulated GTP binding protein 1	0.003483104206227139	0.08786623252312613	TRUE	FALSE	FALSE
ENOG411CPNJ	0	1	4	8	1.8453247825788208	1.970867357354635	1.8652193994381552	1.6177406552263094	0.5	6	2.6984553404577487	ENOG411CPNJ	148222733, 148230753, 148233900, Xelaev18006196m.g, Xelaev18019022m.g	GenBank, Xenbase_9.1	ap1m1.L, ap1m2.L	adaptor-related protein complex 1, mu 2 subunit [Xenopus laevis], uncharacterized protein LOC431991 [Xenopus laevis], adaptor-related protein complex 1, mu 1 subunit [Xenopus laevis], NA	Q9BXS5, Q9Y6Q5	AP1M1, AP1M2	CLTNM, NA	Adaptor-related protein complex 1 mu	0.003483104206227139	0.08786623252312613	TRUE	FALSE	FALSE
ENOG411CUJY	6	16	18	41	1.7818217789802384	2.028539907494571	0.9838638959367741	0.7526702353124177	11	29.5	2.6943325872797472	ENOG411CUJY	Xelaev18009233m.g, Xelaev18013708m.g, Xelaev18005498m.g, Xelaev18016163m.g	Xenbase_9.1	lrba.S, Xetrov90006664m.L, lrba.L, Xetrov90006664m.S	NA	Q8NFP9, P50851	NBEA, LRBA	BCL8B KIAA1544 LYST2, BGL CDC4L LBA	LPS-responsive vesicle trafficking, beach and anchor containing	0.0035264874019031206	0.088129227221392	TRUE	FALSE	FALSE
ENOG411CPP5	1	4	6	17	1.5959913177930014	2.177872818598426	1.3506462266083967	1.2958125603389468	2.5	11.5	2.6685249221190923	ENOG411CPP5	11035016, 148228303, 158429118, Xelaev18038781m.g, Xelaev18009263m.g, Xelaev18000122m.g	GenBank, Xenbase_9.1	smarca1.L, smarca5.S, smarca5.L	imitation switch ISWI [Xenopus laevis], SWI/SNF related, matrix associated, actin dependent regulator of chromatin, subfamily a, member 5 [Xenopus laevis], Chain A, Sant Domain Structure Of Xenopus Remodeling Factor Iswi, NA	O60264, P28370	SMARCA5, SMARCA1	SNF2H WCRF135, SNF2L SNF2L1	SWI SNF related, matrix associated, actin dependent regulator of chromatin, subfamily a, member	0.003809256308849348	0.09431436453576997	TRUE	FALSE	FALSE
ENOG411D1ND	2	4	7	19	1.277263054586856	2.4611887685601666	0.9583288038296363	1.4478156537839968	3	13	2.643484635286471	ENOG411D1ND	Xelaev18007801m.g	Xenbase_9.1	kntc1.L	NA	P50748	KNTC1	KIAA0166	Kinetochore associated 1	0.004102874489647269	0.10065216867263117	FALSE	FALSE	FALSE
ENOG411CRHE	0	0	2	7	1.3048031678308571	2.411317352187284	1.1282538052719489	2.447815653783997	0	4.5	2.627694019411307	ENOG411CRHE	13491131, Xelaev18002150m.g, Xelaev18029433m.g	GenBank, Xenbase_9.1	ttk.L, ttk.S	Mps1/TTK [Xenopus laevis], NA	P33981	TTK	MPS1 MPS1L1	ttk protein kinase	0.004298290134640628	0.102621676964545	FALSE	FALSE	FALSE
ENOG411CUCI	0	0	2	7	1.3048031678308571	2.411317352187284	1.1282538052719489	2.447815653783997	0	4.5	2.627694019411307	ENOG411CUCI	148232866, Xelaev18023609m.g	GenBank, Xenbase_9.1	hsd17b7.L	hydroxysteroid (17-beta) dehydrogenase 7 [Xenopus laevis], NA	P56937	HSD17B7	SDR37C1	Hydroxysteroid (17-beta) dehydrogenase 7	0.004298290134640628	0.102621676964545	FALSE	FALSE	FALSE
ENOG411CWF5	0	0	2	7	1.3048031678308571	2.411317352187284	1.1282538052719489	2.447815653783997	0	4.5	2.627694019411307	ENOG411CWF5	147898493, 147902708, 148231857, 148232206, 148237296, Xelaev18025628m.g, Xelaev18023617m.g, Xelaev18023618m.g, Xelaev18023396m.g, Xelaev18023401m.g, Xelaev18023395m.g, Xelaev18023394m.g, Xelaev18025444m.g, Xelaev18025445m.g, Xelaev18023399m.g, Xelaev18025443m.g	GenBank, Xenbase_9.1	fmo5.S, loc100496770-like.L, fmo5.L, fmo2.L, loc100489107.L, fmo3.L, fmo1.L, loc100489254.S, loc100489107.S, loc100489254.L, fmo2.S	flavin containing monooxygenase 5 [Xenopus laevis], MGC81930 protein [Xenopus laevis], uncharacterized protein LOC494799 [Xenopus laevis], flavin containing monooxygenase 3 [Xenopus laevis], flavin containing monooxygenase 2 (non-functional) [Xenopus laevis], NA	P49326, P31513, O60774, Q01740, Q99518	FMO5, FMO3, FMO6P, FMO1, FMO2	NA, FMO6	Dimethylaniline monooxygenase (N-oxide-forming)	0.004298290134640628	0.102621676964545	FALSE	FALSE	FALSE
ENOG411DEYD	6	18	20	41	2.073985018681236	1.6347783477590914	1.1282538052719489	0.5922055631191716	12	30.5	2.6224917262262037	ENOG411DEYD	148228921, Xelaev18014555m.g	GenBank, Xenbase_9.1	rps6ka3.S	ribosomal protein S6 kinase, 90kDa, polypeptide 3 [Xenopus laevis], NA	P51812	RPS6KA3	ISPK1 MAPKAPK1B RSK2	Protein kinase C terminal domain	0.0043644693614305246	0.10316964697532593	FALSE	FALSE	FALSE
ENOG411CUAY	0	2	5	9	2.06316626569203	1.6418628635537411	2.128253805271949	1.1847812479502031	1	7	2.619851221783374	ENOG411CUAY	147906715, 148224882, 67678144, Xelaev18023303m.g, Xelaev18025369m.g, Xelaev18006266m.g, Xelaev18006511m.g, Xelaev18001245m.g	GenBank, Xenbase_9.1	ptbp2.L, ptbp2.S, ptbp1.L, ptbp3.L, ptbp3.S	hnRNP I-related RNA transport protein VgRBP60 [Xenopus laevis], polypyrimidine tract binding protein 1 [Xenopus laevis], VgRBP60 protein [Xenopus laevis], NA	O95758, P26599, Q9UKA9	PTBP3, PTBP1, PTBP2	ROD1, PTB, NPTB PTB PTBLP	polypyrimidine tract binding protein	0.004398406789523993	0.10316964697532593	FALSE	FALSE	FALSE
ENOG411CUY5	2	5	9	18	1.7118058235169509	1.983624394468825	1.2802568987169987	1.1107806665064264	3.5	13.5	2.6130637665394234	ENOG411CUY5	148226057, Xelaev18036929m.g	GenBank, Xenbase_9.1	actr1a.S	ARP1 actin-related protein 1 homolog A, centractin alpha [Xenopus laevis], NA	P61163, P42025	ACTR1A, ACTR1B	CTRN1, CTRN2	ARP1 actin-related protein 1 homolog	0.004486727899417491	0.10402329555388333	FALSE	FALSE	FALSE
ENOG411DFYG	8	13	19	38	1.351855731157617	2.340794219743728	0.6952943979958428	0.9258629505886413	10.5	28.5	2.6110978208305125	ENOG411DFYG	148231147, Xelaev18017354m.g	GenBank, Xenbase_9.1	apaf1.L	apoptotic peptidase activating factor 1 [Xenopus laevis], NA	O14727	APAF1	KIAA0413	Apoptotic peptidase activating factor 1	0.004512603696428746	0.10402329555388333	FALSE	FALSE	FALSE
ENOG411CTER	0	2	4	10	1.8453247825788208	1.8350835221119444	1.8652193994381552	1.3222847717001378	1	7	2.602441669782125	ENOG411CTER	147903637, 147903829, Xelaev18026762m.g, Xelaev18040015m.g, Xelaev18041002m.g	GenBank, Xenbase_9.1	strn.L, strn3.L, strn3.S	striatin, calmodulin binding protein 3 [Xenopus laevis], striatin, calmodulin binding protein [Xenopus laevis], NA	O43815, Q13033, Q9NRL3	STRN, STRN3, STRN4	NA, GS2NA SG2NA, ZIN	Striatin, calmodulin binding protein	0.004628127980342825	0.1048780866053959	FALSE	FALSE	FALSE
ENOG411CRUV	0	2	4	10	1.8453247825788208	1.8350835221119444	1.8652193994381552	1.3222847717001378	1	7	2.602441669782125	ENOG411CRUV	112491337, 125858782, 147902176, 158428921, 2554749, 2851464, 3319098, Xelaev18013758m.g, Xelaev18016209m.g	GenBank, Xenbase_9.1	gtf3a.L, gtf3a.S	Chain A, Transcription Factor Iiia Zinc Fingers 4-6 Bound To 5s Rrna 55mer (Nmr Structure), Gtf3a protein [Xenopus laevis], transcription factor IIIA [Xenopus laevis], Chain A, Invariance Of The Zinc Finger Module: A Comparison Of The Free Structure With Those In Nucleic-Acid Complexes, Chain A, Tfiiia Finger 1-3 Bound To Dna, Nmr, 22 Structures, RecName: Full=Transcription factor IIIA; Short=TFI…	Q92664	GTF3A	NA	general transcription factor IIIA	0.004628127980342825	0.1048780866053959	FALSE	FALSE	FALSE
ENOG411CZB5	0	0	4	4	1.8453247825788208	1.822740620542688	1.8652193994381552	1.7697437486713592	0	4	2.593713920382986	ENOG411CZB5	124481768, 147898636, Xelaev18006505m.g, Xelaev18001254m.g	GenBank, Xenbase_9.1	loc100486893.L, loc100486893.S	Unknown (protein for IMAGE:6927834) [Xenopus laevis], structural maintenance of chromosomes protein 2 [Xenopus laevis], NA	O95347	SMC2	CAPE SMC2L1	structural maintenance of chromosomes 2	0.00474727264411781	0.10578505875309187	FALSE	FALSE	FALSE
ENOG411CUVM	0	0	4	4	1.8453247825788208	1.822740620542688	1.8652193994381552	1.7697437486713592	0	4	2.593713920382986	ENOG411CUVM	147898503, Xelaev18039986m.g, Xelaev18028984m.g, Xelaev18026729m.g	GenBank, Xenbase_9.1	fam98b.L, loc100488558-like.S, loc100488558-like.L	family with sequence similarity 98, member B [Xenopus laevis], NA	Q8NCA5, Q52LJ0	FAM98A, FAM98B	NA	Family with sequence similarity 98, member	0.00474727264411781	0.10578505875309187	FALSE	FALSE	FALSE
ENOG411CSH9	0	0	1	9	0.9226215573892205	2.7342208434957653	0.5432913045507926	2.769743748671359	0	5	2.5857780593962687	ENOG411CSH9	Xelaev18028864m.g	Xenbase_9.1	anapc1.S	NA	Q9H1A4	ANAPC1	TSG24	Anaphase promoting complex subunit 1	0.004857973484110138	0.10647722210254515	FALSE	FALSE	FALSE
ENOG411CY7Q	0	0	1	9	0.9226215573892205	2.7342208434957653	0.5432913045507926	2.769743748671359	0	5	2.5857780593962687	ENOG411CY7Q	120538277, Xelaev18013471m.g, Xelaev18015960m.g	GenBank, Xenbase_9.1	tsfm.L, tsfm.S	LOC100036913 protein [Xenopus laevis], NA	P43897	TSFM	NA	Associates with the EF-Tu.GDP complex and induces the exchange of GDP to GTP. It remains bound to the aminoacyl-tRNA.EF- Tu.GTP complex up to the GTP hydrolysis stage on the ribosome (By similarity)	0.004857973484110138	0.10647722210254515	FALSE	FALSE	FALSE
ENOG411CUMF	3	9	9	30	1.2597151332185783	2.3919832201691826	0.8652193994381551	1.0800838692835097	6	19.5	2.5821406685282353	ENOG411CUMF	147901482, Xelaev18034296m.g	GenBank, Xenbase_9.1	mcmbp.L	mini-chromosome maintenance complex-binding protein [Xenopus laevis], NA	Q9BTE3	MCMBP	C10orf119	Minichromosome maintenance complex binding protein	0.004909477691854579	0.10673124673186295	FALSE	FALSE	FALSE
ENOG411CWER	0	3	5	11	2.06316626569203	1.5741026144820363	2.128253805271949	1.032778154505153	1.5	8	2.571937490169882	ENOG411CWER	125654, 147905211, 148224421, 148233173, 148235142, 148236905, 213623836, 241260, 38175247, 51258561, 52145402, Xelaev18001868m.g, Xelaev18019800m.g, Xelaev18002603m.g	GenBank, Xenbase_9.1	raf1.L, braf.S, raf1.S	RecName: Full=RAF proto-oncogene serine/threonine-protein kinase; AltName: Full=C-RAF, v-raf murine sarcoma 3611 viral oncogene homolog [Xenopus laevis], MGC86346 protein [Xenopus laevis], RAF proto-oncogene serine/threonine-protein kinase [Xenopus laevis], B-Raf [Xenopus laevis], BRAF protein [Xenopus laevis], raf protein [Xenopus laevis], serine/threonine protein kinase ARAF [Xenopus laevis], NA	P15056, P04049, P10398	BRAF, RAF1, ARAF	BRAF1 RAFB1, RAF, ARAF1 PKS PKS2	viral oncogene homolog	0.005056557489751304	0.10674767975859929	FALSE	FALSE	FALSE
ENOG411CUN2	0	0	3	5	1.5980745634395823	2.0379023504666143	1.5432913045507926	2.032778154505153	0	4	2.571023932060807	ENOG411CUN2	Xelaev18024996m.g, Xelaev18022833m.g	Xenbase_9.1	cnot1.S, cnot1.L	NA	A5YKK6	CNOT1	CDC39 KIAA1007 NOT1	CCR4-NOT transcription complex subunit 1	0.0050699159795595024	0.10674767975859929	FALSE	FALSE	FALSE
ENOG411CUPX	0	0	3	5	1.5980745634395823	2.0379023504666143	1.5432913045507926	2.032778154505153	0	4	2.571023932060807	ENOG411CUPX	148225212, 49522202	GenBank	NA	N-terminal kinase-like protein [Xenopus laevis], LOC443710 protein [Xenopus laevis]	Q96KG9	SCYL1	CVAK90 GKLP NTKL TAPK TEIF TRAP	SCY1-like 1 (S. cerevisiae)	0.0050699159795595024	0.10674767975859929	FALSE	FALSE	FALSE
ENOG411CPWC	0	0	3	5	1.5980745634395823	2.0379023504666143	1.5432913045507926	2.032778154505153	0	4	2.571023932060807	ENOG411CPWC	114107806, 118217, Xelaev18042170m.g, Xelaev18013546m.g, Xelaev18013545m.g	GenBank, Xenbase_9.1	gtsf1.S, gtsf1.L, loc100145274.L	MGC154308 protein [Xenopus laevis], RecName: Full=Protein D7, NA	Q8WW33	GTSF1	FAM112B	Gametocyte specific factor 1	0.0050699159795595024	0.10674767975859929	FALSE	FALSE	FALSE
ENOG411CVY2	0	2	3	11	1.5980745634395823	2.015892331849103	1.5432913045507926	1.447815653783997	1	7	2.5554604986423226	ENOG411CVY2	147906160	GenBank	NA	elongator complex protein 3 [Xenopus laevis]	Q9H9T3	ELP3	NA	elongator acetyltransferase complex subunit 3	0.005302369846994467	0.10889917319222271	FALSE	FALSE	FALSE
ENOG411CTY3	0	2	3	11	1.5980745634395823	2.015892331849103	1.5432913045507926	1.447815653783997	1	7	2.5554604986423226	ENOG411CTY3	147903337, 148226530, 54311494, Xelaev18041117m.g, Xelaev18039823m.g	GenBank, Xenbase_9.1	actr10.S, actr10.L	MGC82862 protein [Xenopus laevis], actin-related protein 10 homolog [Xenopus laevis], LOC495357 protein [Xenopus laevis], NA	Q9NZ32	ACTR10	ACTR11 ARP11	Actin-related protein 10 homolog (S. cerevisiae)	0.005302369846994467	0.10889917319222271	FALSE	FALSE	FALSE
ENOG411CUYN	0	1	4	7	1.8453247825788208	1.7681752766489778	1.8652193994381552	1.447815653783997	0.5	5.5	2.5551303956979674	ENOG411CUYN	147898471, 71679804, Xelaev18040018m.g, Xelaev18026727m.g	GenBank, Xenbase_9.1	heatr5a.L, heatr5b.L	hypothetical protein LOC734613 [Xenopus laevis], LOC733331 protein [Xenopus laevis], NA	Q9P2D3, Q86XA9	HEATR5B, HEATR5A	KIAA1414, C14orf125 KIAA1316	HEAT repeat containing	0.005307401248824575	0.10889917319222271	FALSE	FALSE	FALSE
ENOG411CUKV	11	27	31	55	2.1851297230466686	1.4258165206757576	0.9583288038296363	0.447815653783997	19	43	2.5533245754362195	ENOG411CUKV	111185527, 124481898, 125858544, 147902627, 148229642, 351722080, 50415403, 51703510, 51704144, 68533947, Xelaev18001628m.g, Xelaev18001648m.g, Xelaev18047951m.g, Xelaev18036220m.g, Xelaev18001975m.g, Xelaev18001671m.g, Xelaev18047956m.g, Xelaev18036221m.g, Xelaev18001974m.g, Xelaev18036219m.g	GenBank, Xenbase_9.1	gbp4.L, Xelaev18001648m.g, gbp7.S, Xelaev18036220m.g, Xelaev18001975m.g, gbp6.1, gbp5.S, Xelaev18036221m.g, Xelaev18001974m.g, gbp2.L	LOC398692 protein [Xenopus laevis], Unknown (protein for MGC:160143) [Xenopus laevis], LOC100037176 protein [Xenopus laevis], guanylate binding protein 2, interferon-inducible [Xenopus laevis], guanylate binding protein 4 [Xenopus laevis], guanylate binding protein 7 [Xenopus laevis], Unknown (protein for MGC:82969) [Xenopus laevis], MGC82824 protein [Xenopus laevis], LOC446944 protein [Xenopus l…	Q96PP9, Q6ZN66, Q8N8V2	GBP4, GBP6, GBP7	NA, GBP4L	Guanylate binding protein	0.005335000631331779	0.10889917319222271	FALSE	FALSE	FALSE
ENOG411D0MN	0	3	4	12	1.8453247825788208	1.756075445036376	1.8652193994381552	1.1482553719250892	1.5	8	2.546574522713481	ENOG411D0MN	Xelaev18013779m.g, Xelaev18016226m.g	Xenbase_9.1	mipep.L, mipep.S	NA	Q99797	MIPEP	MIP	Mitochondrial intermediate peptidase	0.005439299045333684	0.10897761680213842	FALSE	FALSE	FALSE
ENOG411CR17	0	3	4	12	1.8453247825788208	1.756075445036376	1.8652193994381552	1.1482553719250892	1.5	8	2.546574522713481	ENOG411CR17	147899678, 148232138, Xelaev18005003m.g, Xelaev18034486m.g, Xelaev18017351m.g, Xelaev18021330m.g, Xelaev18036811m.g, Xelaev18008842m.g	GenBank, Xenbase_9.1	kdm3a.L, jmjd1c.L, kdm3b.L, kdm3b.S, jmjd1c.S, kdm3a.S	lysine-specific demethylase 3A-B [Xenopus laevis], lysine-specific demethylase 3A-A [Xenopus laevis], NA	Q15652, Q7LBC6, Q9Y4C1	JMJD1C, KDM3B, KDM3A	JHDM2C KIAA1380 TRIP8, C5orf7 JHDM2B JMJD1B KIAA1082, JHDM2A JMJD1 JMJD1A KIAA0742 TSGA	lysine (K)-specific demethylase	0.005439299045333684	0.10897761680213842	FALSE	FALSE	FALSE
ENOG411CTDA	1	3	8	11	2.022727217053003	1.5741026144820363	1.7132163059931051	1.032778154505153	2	9.5	2.5433427646524933	ENOG411CTDA	171847166, 315192413, 315192415, 315192419, 315192427, 315192431, Xelaev18003710m.g	GenBank, Xenbase_9.1	mogs.L	LOC100158418 protein [Xenopus laevis], Mogs [Xenopus laevis], NA	Q13724	MOGS	GCS1	mannosyl-oligosaccharide glucosidase	0.005489873073168555	0.10897761680213842	FALSE	FALSE	FALSE
ENOG411CPU1	5	7	10	30	0.6866102073317849	2.909141691849711	0.4177604224669338	1.4020119641708721	6	20	2.5425805513756425	ENOG411CPU1	148228118	GenBank	NA	nucleoporin 155kDa [Xenopus laevis]	O75694	NUP155	KIAA0791	Nucleoporin 155kDa	0.0055018617308484246	0.10897761680213842	FALSE	FALSE	FALSE
ENOG411CWSX	128	172	192	336	0.5063110353621432	3.078384521289327	0.12452108639561883	0.40979220732913063	150	264	2.5347625365975404	ENOG411CWSX	1150850, 120577592, 147900510, 148232054, 54873684, Xelaev18039699m.g, Xelaev18026411m.g	GenBank, Xenbase_9.1	hsp90aa1.1.L, hsp90ab1.L	heat shock protein 90 [Xenopus laevis], LOC100037031 protein [Xenopus laevis], heat shock protein 90kDa alpha (cytosolic), class A member 1, gene 1 [Xenopus laevis], heat shock protein 90kDa alpha (cytosolic), class B member 1 [Xenopus laevis], Hsp90alpha [Xenopus laevis], NA	Q58FF6, Q14568, Q58FG0, P07900, P08238	HSP90AB4P, HSP90AA2P, HSP90AA5P, HSP90AA1, HSP90AB1	NA, HSP90AA2 HSPCAL3, HSP90AE, HSP90A HSPC1 HSPCA, HSP90B HSPC2 HSPCB	Heat shock protein 90kDa alpha (Cytosolic), class	0.0056261787197449216	0.11062060218086706	FALSE	FALSE	FALSE
ENOG411CVJR	1	8	9	20	2.210753139971888	1.3606741563017883	1.8652193994381552	0.6702080751204449	4.5	14.5	2.525380459709853	ENOG411CVJR	148224403, Xelaev18012674m.g, Xelaev18018318m.g	GenBank, Xenbase_9.1	unc45b.L, unc45a.L	protein unc-45 homolog B [Xenopus laevis], NA	Q8IWX7, Q9H3U1	UNC45B, UNC45A	CMYA4 UNC45, SMAP1	Unc-45 homolog	0.005778654660446689	0.11278921578127334	FALSE	FALSE	FALSE
ENOG411CPDS	0	1	6	5	2.260118752373529	1.297537405746528	2.3506462266083967	1.032778154505153	0.5	5.5	2.5156427945367725	ENOG411CPDS	148233008, Xelaev18039995m.g	GenBank, Xenbase_9.1	dph6.L	ATP binding domain 4 [Xenopus laevis], NA	Q7L8W6	DPH6	ATPBD4	ATP binding domain 4	0.005940776773762081	0.11421406090109207	FALSE	FALSE	FALSE
ENOG411CPD2	1	6	6	20	1.5959913177930014	1.9528419152831267	1.3506462266083967	1.032778154505153	3.5	13	2.50940404440831	ENOG411CPD2	Xelaev18038499m.g	Xenbase_9.1	ercc6l.L	NA	Q2NKX8	ERCC6L	PICH	excision repair cross-complementing rodent repair deficiency, complementation group 6-like	0.0060467533676583285	0.11421406090109207	FALSE	FALSE	FALSE
ENOG411CX3D	19	27	35	68	0.9989649856930074	2.5412622519792514	0.3912882111057427	0.748985188504562	23	51.5	2.503318686699373	ENOG411CX3D	148225797, Xelaev18040780m.g, Xelaev18042893m.g	GenBank, Xenbase_9.1	ndufs2.L, ndufs2.S	NADH dehydrogenase (ubiquinone) Fe-S protein 2, 49kDa (NADH-coenzyme Q reductase) [Xenopus laevis], NA	O75306	NDUFS2	NA	NADH dehydrogenase (Ubiquinone) Fe-S protein 2, 49kDa (NADH-coenzyme Q reductase)	0.006151735142089989	0.11421406090109207	FALSE	FALSE	FALSE
ENOG411CXVJ	4	9	11	29	1.2640953928779595	2.2753485929245034	0.8063257103845864	1.032778154505153	6.5	20	2.502764843990864	ENOG411CXVJ	Xelaev18034105m.g	Xenbase_9.1	mroh1.S	NA	A6NES4, Q8NDA8, Q7Z745	MROH2A, MROH1, MROH2B	HEATR7B1, HEATR7A KIAA1833, HEATR7B2	HEAT repeat	0.006161369476522056	0.11421406090109207	FALSE	FALSE	FALSE
ENOG411CVPX	0	0	2	6	1.3048031678308571	2.232428122919567	1.1282538052719489	2.255170575841601	0	4	2.501200232314869	ENOG411CVPX	148235132, 213623970, Xelaev18008120m.g, Xelaev18010857m.g, Xelaev18023174m.g, Xelaev18025278m.g	GenBank, Xenbase_9.1	zfyve16.L, zfyve16.S, zfyve9.L, zfyve9.S	zinc finger, FYVE domain containing 9 [Xenopus laevis], Smad anchor for receptor activation [Xenopus laevis], NA	Q7Z3T8, O95405	ZFYVE16, ZFYVE9	KIAA0305, MADHIP SARA SMADIP	Zinc finger, FYVE domain containing	0.006188658829751473	0.11421406090109207	FALSE	FALSE	FALSE
ENOG411CT96	0	0	2	6	1.3048031678308571	2.232428122919567	1.1282538052719489	2.255170575841601	0	4	2.501200232314869	ENOG411CT96	126631763, 147904732, 148230667, 148234018, Xelaev18047419m.g, Xelaev18043074m.g, Xelaev18045030m.g, Xelaev18045854m.g, Xelaev18045853m.g	GenBank, Xenbase_9.1	stat1.S, Xelaev18043074m.g, stat1.L, Xelaev18045854m.g, Xelaev18045853m.g	Unknown (protein for MGC:160806) [Xenopus laevis], signal transducer and activator of transcription 1, 91kDa [Xenopus laevis], signal transducer and activator of transcription 3.1 [Xenopus laevis], signal transducer and activator of transcription 3.2 [Xenopus laevis], NA	P42224, P40763	STAT1, STAT3	NA, APRF	Signal transducer and activator of transcription	0.006188658829751473	0.11421406090109207	FALSE	FALSE	FALSE
ENOG411CU21	0	0	2	6	1.3048031678308571	2.232428122919567	1.1282538052719489	2.255170575841601	0	4	2.501200232314869	ENOG411CU21	1000735, 148226891, 169642010, 773360, 773362, Xelaev18014462m.g, Xelaev18037733m.g, Xelaev18035964m.g	GenBank, Xenbase_9.1	gsk3b.S, gsk3a.S, gsk3a.L	glycogen synthase kinase 3 beta [Xenopus laevis], glycogen synthase kinase-3 beta [Xenopus laevis], Unknown (protein for IMAGE:8332721) [Xenopus laevis], glycogen synthase kinase 3 [Xenopus laevis], NA	P49841, P49840, M0QYV0	GSK3B, GSK3A, NA	NA	Glycogen synthase kinase 3	0.006188658829751473	0.11421406090109207	FALSE	FALSE	FALSE
ENOG411CZJ3	20	39	47	76	2.090287432575725	1.4465637231581683	0.7359363824931886	0.3926740995915358	29.5	61.5	2.5009314362669137	ENOG411CZJ3	117167935, 148229816, 36939185	GenBank	NA	IsoT protein [Xenopus laevis], ubiquitin specific peptidase 5 (isopeptidase T) [Xenopus laevis], isopeptidase T [Xenopus laevis]	P45974	USP5	ISOT	ubiquitin specific peptidase 5 (isopeptidase T)	0.0061933578274713345	0.11421406090109207	FALSE	FALSE	FALSE
ENOG411CY20	0	0	1	8	0.9226215573892205	2.5778274065961155	0.5432913045507926	2.617740655226309	0	4.5	2.475191199631456	ENOG411CY20	148235751, 28422163, Xelaev18045423m.g	GenBank, Xenbase_9.1	plk1.L	serine/threonine-protein kinase PLK1 [Xenopus laevis], Plk-prov protein [Xenopus laevis], NA	P53350	PLK1	PLK	polo-like kinase 1	0.006658243198789698	0.12194618022988804	FALSE	FALSE	FALSE
ENOG411CPXC	15	23	31	56	1.3129081936387197	2.175992757071866	0.5432913045507926	0.6957431672275823	19	43.5	2.4670255211356475	ENOG411CPXC	209969740, 47938740, Xelaev18002234m.g, Xelaev18001297m.g	GenBank, Xenbase_9.1	eif3c.S, eif3c.L	eukaryotic translation initiation factor 3 subunit C [Xenopus laevis], LOC432230 protein [Xenopus laevis], NA	Q99613, B5ME19	EIF3C, EIF3CL	EIF3S8, NA	Component of the eukaryotic translation initiation factor 3 (eIF-3) complex, which is required for several steps in the initiation of protein synthesis. The eIF-3 complex associates with the 40S ribosome and facilitates the recruitment of eIF-1, eIF-1A, eIF-2 GTP methionyl-tRNAi and eIF-5 to form the 43S preinitiation complex (43S PIC). The eIF-3 complex stimulates mRNA recruitment to the 43S PIC…	0.006812032345835569	0.12367214885099193	FALSE	FALSE	FALSE
ENOG411CPUN	8	17	19	44	1.351855731157617	2.1346011378769583	0.6952943979958428	0.7697437486713592	12.5	31.5	2.4652972944087668	ENOG411CPUN	148237924, Xelaev18045189m.g, Xelaev18047512m.g	GenBank, Xenbase_9.1	nomo3.L, nomo3.S	NODAL modulator 3 [Xenopus laevis], NA	Q15155, Q5JPE7, P69849	NOMO1, NOMO2, NOMO3	PM5, NA	nodal modulator	0.006844980564677189	0.12367214885099193	FALSE	FALSE	FALSE
ENOG411CWXR	2	2	7	12	1.277263054586856	2.1861716231365547	0.9583288038296363	1.563292871203933	2	9.5	2.4490181468148684	ENOG411CWXR	Xelaev18042479m.g, Xelaev18039227m.g	Xenbase_9.1	gnl1.S, gnl1.L	NA	P36915	GNL1	HSR1	Guanine nucleotide binding protein-like 1	0.007162311547325245	0.1278489403316276	FALSE	FALSE	FALSE
ENOG411CPGW	0	1	2	9	1.3048031678308571	2.157958478269589	1.1282538052719489	1.7697437486713592	0.5	5.5	2.4485422415903173	ENOG411CPGW	147902170	GenBank	NA	sec1 family domain containing 1 [Xenopus laevis]	Q8WVM8	SCFD1	C14orf163 KIAA0917 STXBP1L2	Sec1 family domain containing 1	0.007171780497286515	0.1278489403316276	FALSE	FALSE	FALSE
ENOG411CS1T	7	15	27	28	2.6966248163806665	0.7382326803027282	1.3506462266083967	0.3057966489115691	11	27.5	2.4288110283142776	ENOG411CS1T	147898604, 148237107, Xelaev18044813m.g	GenBank, Xenbase_9.1	ndufa10.L	NADH dehydrogenase (ubiquinone) 1 alpha subcomplex, 10, 42kDa [Xenopus laevis], NA	O95299	NDUFA10	NA	NADH dehydrogenase ubiquinone 1 alpha subcomplex 10	0.007574212820255631	0.13406273246098505	FALSE	FALSE	FALSE
ENOG411CTWR	2	3	8	13	1.5035333043874688	1.9281909727377486	1.1282538052719489	1.2551705758416012	2.5	10.5	2.426595507517744	ENOG411CTWR	147904663, Xelaev18018235m.g	GenBank, Xenbase_9.1	galk2.L	galactokinase 2 [Xenopus laevis], NA	Q01415	GALK2	GK2	Galactokinase 2	0.007620619047894438	0.13406273246098505	FALSE	FALSE	FALSE
ENOG411CWZ8	0	0	3	4	1.5980745634395823	1.822740620542688	1.5432913045507926	1.7697437486713592	0	3.5	2.4188816137797704	ENOG411CWZ8	11385422, 11692798, 148237930, 49119090, 90110844	GenBank	NA	Atr protein [Xenopus laevis], ataxia telangiectasia and Rad3-related protein [Xenopus laevis], serine/threonine-protein kinase atr [Xenopus laevis], Unknown (protein for IMAGE:5048682) [Xenopus laevis], RecName: Full=Serine/threonine-protein kinase atr; Short=Xatr; AltName: Full=Ataxia telangiectasia and Rad3-related protein	Q13535	ATR	FRP1	Ataxia telangiectasia and Rad3 related	0.007784153034372458	0.13516120268773996	FALSE	FALSE	FALSE
ENOG411CXME	0	0	3	4	1.5980745634395823	1.822740620542688	1.5432913045507926	1.7697437486713592	0	3.5	2.4188816137797704	ENOG411CXME	1325970, 1373400, 1389556, Xelaev18046335m.g	GenBank, Xenbase_9.1	Xelaev18046335m.g	TFIIS elongation factor [Xenopus laevis], transcription elongation factor type xTFIIS.l [Xenopus laevis], transcriptional factor [Xenopus laevis], NA	P23193, Q15560	TCEA1, TCEA2	GTF2S TFIIS, NA	transcription elongation factor A (SII)	0.007784153034372458	0.13516120268773996	FALSE	FALSE	FALSE
ENOG411CTA9	15	37	40	68	2.321401896246186	1.0709494471918357	0.9008433091688764	0.3084125971185804	26	54	2.39875463911232	ENOG411CTA9	147901189, 148235919, 48734648, Xelaev18032984m.g	GenBank, Xenbase_9.1	slc25a13.S	solute carrier family 25, member 13 (citrin) [Xenopus laevis], solute carrier family 25 (mitochondrial carrier, Aralar), member 12 [Xenopus laevis], LOC443574 protein [Xenopus laevis], NA	O75746, Q9UJS0	SLC25A12, SLC25A13	ARALAR1, ARALAR2	solute carrier family 25 (aspartate glutamate carrier), member	0.008225466909703542	0.14166217295247238	FALSE	FALSE	FALSE
ENOG411CR6T	2	5	9	16	1.7118058235169509	1.6780924341172538	1.2802568987169987	0.9503159943131801	3.5	12.5	2.397020045505608	ENOG411CR6T	148225687	GenBank	NA	glutaryl-CoA dehydrogenase [Xenopus laevis]	Q92947	GCDH	NA	Glutaryl-CoA dehydrogenase	0.008264509716000632	0.14166217295247238	FALSE	FALSE	FALSE
ENOG411CQEU	1	1	3	12	0.7272110266705417	2.651061252712575	0.5432913045507926	2.148255371925089	1	7.5	2.388799237446337	ENOG411CQEU	116487994, 120537880, Xelaev18030302m.g, Xelaev18028412m.g	GenBank, Xenbase_9.1	tmem214.S, tmem214.L	MGC154890 protein [Xenopus laevis], LOC100036861 protein [Xenopus laevis], NA	Q6NUQ4	TMEM214	NA	Transmembrane protein 214	0.008451768266677165	0.14394922512799196	FALSE	FALSE	FALSE
ENOG411CRH4	2	1	6	10	1.0284923925464566	2.3323531750776914	0.7656837258872404	1.907247272421294	1.5	8	2.3764766913877864	ENOG411CRH4	71679822, Xelaev18024803m.g	GenBank, Xenbase_9.1	dnaaf1.S	Chc1-b-prov protein [Xenopus laevis], NA	Q8NEP3	DNAAF1	LRRC50	dynein, axonemal, assembly factor 1	0.008739432832274541	0.14790660375634254	FALSE	FALSE	FALSE
ENOG411CQMM	0	0	2	5	1.3048031678308571	2.0379023504666143	1.1282538052719489	2.032778154505153	0	3.5	2.3636497394978346	ENOG411CQMM	148227146, Xelaev18012497m.g, Xelaev18015180m.g	GenBank, Xenbase_9.1	sf3a3.L, sf3a3.S	splicing factor 3a, subunit 3, 60kDa [Xenopus laevis], NA	Q12874	SF3A3	SAP61	splicing factor 3a, subunit 3, 60kDa	0.009047956065029129	0.14820478239194906	FALSE	FALSE	FALSE
ENOG411CVYM	0	0	2	5	1.3048031678308571	2.0379023504666143	1.1282538052719489	2.032778154505153	0	3.5	2.3636497394978346	ENOG411CVYM	147906372, Xelaev18020580m.g, Xelaev18018281m.g	GenBank, Xenbase_9.1	efl1.S, efl1.L	elongation factor Tu GTP binding domain containing 1 [Xenopus laevis], NA	Q7Z2Z2	EFL1	EFTUD1 FAM42A	elongation factor Tu GTP binding domain containing 1	0.009047956065029129	0.14820478239194906	FALSE	FALSE	FALSE
ENOG411CS53	0	0	2	5	1.3048031678308571	2.0379023504666143	1.1282538052719489	2.032778154505153	0	3.5	2.3636497394978346	ENOG411CS53	147905270, 148228440, Xelaev18025066m.g, Xelaev18022913m.g, Xelaev18018953m.g, Xelaev18008545m.g, Xelaev18011172m.g	GenBank, Xenbase_9.1	dnajb4.S, dnajb4.L, dnajb1.L, dnajb5-like.L, dnajb5-like.S	DnaJ (Hsp40) homolog, subfamily B, member 4 [Xenopus laevis], DnaJ (Hsp40) homolog, subfamily B, member 5 [Xenopus laevis], NA	O75953, Q9UDY4, P25685	DNAJB5, DNAJB4, DNAJB1	HSC40, DNAJW HLJ1, DNAJ1 HDJ1 HSPF1	DnaJ (Hsp40) homolog, subfamily B, member	0.009047956065029129	0.14820478239194906	FALSE	FALSE	FALSE
ENOG411CQG9	0	0	2	5	1.3048031678308571	2.0379023504666143	1.1282538052719489	2.032778154505153	0	3.5	2.3636497394978346	ENOG411CQG9	125858108, 62739384, Xelaev18011529m.g	GenBank, Xenbase_9.1	ltn1.L	Unknown (protein for IMAGE:8542577) [Xenopus laevis], LOC733217 protein [Xenopus laevis], NA	O94822	LTN1	C21orf10 C21orf98 KIAA0714 RNF160 ZNF294	listerin E3 ubiquitin protein ligase 1	0.009047956065029129	0.14820478239194906	FALSE	FALSE	FALSE
ENOG411CX4A	0	0	1	7	0.9226215573892205	2.411317352187284	0.5432913045507926	2.447815653783997	0	4	2.35745081102323	ENOG411CX4A	148228028, Xelaev18046079m.g, Xelaev18043329m.g	GenBank, Xenbase_9.1	cdc27.S, cdc27.L	cell division cycle 27 homolog [Xenopus laevis], NA	P30260	CDC27	ANAPC3 D0S1430E D17S978E	Cell division cycle 27 homolog (S. cerevisiae)	0.009200446476089584	0.14820478239194906	FALSE	FALSE	FALSE
ENOG411CT46	0	0	1	7	0.9226215573892205	2.411317352187284	0.5432913045507926	2.447815653783997	0	4	2.35745081102323	ENOG411CT46	123916375, Xelaev18006306m.g, Xelaev18009836m.g	GenBank, Xenbase_9.1	rfx2.L, rfx2.S	RecName: Full=DNA-binding protein RFX2; AltName: Full=Regulatory factor X 2, NA	P48378	RFX2	NA	regulatory factor X, 2 (influences HLA class II expression)	0.009200446476089584	0.14820478239194906	FALSE	FALSE	FALSE
ENOG411CSW2	0	0	1	7	0.9226215573892205	2.411317352187284	0.5432913045507926	2.447815653783997	0	4	2.35745081102323	ENOG411CSW2	1071782, 51873790, Xelaev18041786m.g, Xelaev18038615m.g	GenBank, Xenbase_9.1	ssr4.S, ssr4.L	unnamed protein product [Xenopus laevis], LOC397945 protein [Xenopus laevis], NA	P51571	SSR4	TRAPD	Signal sequence receptor, delta	0.009200446476089584	0.14820478239194906	FALSE	FALSE	FALSE
ENOG411CQM7	0	0	1	7	0.9226215573892205	2.411317352187284	0.5432913045507926	2.447815653783997	0	4	2.35745081102323	ENOG411CQM7	147902353, 15809658, 27924238, 77748491, Xelaev18006562m.g, Xelaev18006554m.g, Xelaev18001206m.g, Xelaev18010864m.g	GenBank, Xenbase_9.1	Xelaev18006562m.g, Xelaev18006554m.g, Xelaev18001206m.g, smn2.S	survival of motor neuron 2, centromeric [Xenopus laevis], survival motor neuron [Xenopus laevis], LOC398438 protein [Xenopus laevis], LOC733398 protein [Xenopus laevis], NA	Q16637	SMN1; SMN2	SMN SMNT; SMNC	Survival motor neuron	0.009200446476089584	0.14820478239194906	FALSE	FALSE	FALSE
ENOG411CVR3	24	48	47	98	1.4064893425940153	1.9174011655319472	0.4843976154972241	0.46246242974839824	36	72.5	2.350345518217467	ENOG411CVR3	125858001, 147900724, 49118234, 67677951, Xelaev18034294m.g, Xelaev18036674m.g	GenBank, Xenbase_9.1	eif3a.L, eif3a.S	LOC443632 protein [Xenopus laevis], nucleolin [Xenopus laevis], NA	Q14152	EIF3A	EIF3S10 KIAA0139	Component of the eukaryotic translation initiation factor 3 (eIF-3) complex, which is required for several steps in the initiation of protein synthesis. The eIF-3 complex associates with the 40S ribosome and facilitates the recruitment of eIF-1, eIF-1A, eIF-2 GTP methionyl-tRNAi and eIF-5 to form the 43S preinitiation complex (43S PIC). The eIF-3 complex stimulates mRNA recruitment to the 43S PIC…	0.009377995717143454	0.1501602428002491	FALSE	FALSE	FALSE
ENOG411CXFN	2	4	7	16	1.277263054586856	2.0278227924929975	0.9583288038296363	1.2133504001469737	3	11.5	2.337048614873849	ENOG411CXFN	147901548, 172046123, 28436769	GenBank	NA	methionyl aminopeptidase 1 [Xenopus laevis], RecName: Full=Methionine aminopeptidase 1; Short=MAP 1; Short=MetAP 1; AltName: Full=Peptidase M 1, Metap1 protein [Xenopus laevis]	P53582	METAP1	KIAA0094	Removes the N-terminal methionine from nascent proteins (By similarity)	0.009718328207106209	0.15386459083081055	FALSE	FALSE	FALSE
ENOG411CTW8	3	5	8	20	1.0374882177512812	2.2672659702307243	0.7132163059931051	1.2551705758416012	4	14	2.336814096476718	ENOG411CTW8	Xelaev18028069m.g	Xenbase_9.1	nbas.L	NA	A2RRP1	NBAS	NAG	Neuroblastoma amplified sequence	0.009724426271655566	0.15386459083081055	FALSE	FALSE	FALSE
ENOG411CRVH	1	0	4	6	1.0630801652182171	2.232428122919567	0.8652193994381551	2.255170575841601	0.5	5	2.330276257998698	ENOG411CRVH	147904164, 148224447, 28386066	GenBank	NA	uncharacterized protein LOC398565 [Xenopus laevis], uncharacterized protein LOC495035 [Xenopus laevis], LOC398565 protein [Xenopus laevis]	Q9NUQ8	ABCF3	NA	ATP-binding cassette, subfamily F (GCN20), member 3	0.009895777380363001	0.15565475714759214	FALSE	FALSE	FALSE
ENOG411CZXI	0	2	8	5	2.609837352644535	0.6802222002387145	2.713216305993105	0.447815653783997	1	6.5	2.3264234203513263	ENOG411CZXI	147903207, 66911762, 77748265, Xelaev18003681m.g, Xelaev18008672m.g	GenBank, Xenbase_9.1	nop56.L, nop56.S	XNop56 protein [Xenopus laevis], NA	O00567	NOP56	NOL5A	NOP56 ribonucleoprotein homolog (yeast)	0.009997986705912294	0.15634278626672207	FALSE	FALSE	FALSE
ENOG411CYJK	0	2	5	7	2.06316626569203	1.2075138712135043	2.128253805271949	0.8628531530628408	1	6	2.312720103898049	ENOG411CYJK	147905991, Xelaev18029886m.g, Xelaev18013130m.g, Xelaev18015655m.g, Xelaev18029885m.g, Xelaev18027817m.g	GenBank, Xenbase_9.1	farp2.S, farp1-like.L, farp1-like.S, Xelaev18029885m.g, farp2.L	FERM, RhoGEF and pleckstrin domain protein 2 [Xenopus laevis], NA	Q9Y4F1, O94887	FARP1, FARP2	CDEP PLEKHC2, KIAA0793 PLEKHC3	FERM, RhoGEF (Arhgef) and pleckstrin domain protein 1 (chondrocyte-derived)	0.010369016482237783	0.16120203531106878	FALSE	FALSE	FALSE
ENOG411D1N4	3	10	13	23	2.0138354885729064	1.2493918562026316	1.3506462266083967	0.5733465358678558	6.5	18	2.307450184044155	ENOG411D1N4	115292025, 122936362, 77748380	GenBank	NA	LOC733390 protein [Xenopus laevis]	Q9BZE1	MRPL37	MRPL2 RPML2	mitochondrial ribosomal protein L37	0.010514868164737566	0.16252460966767776	FALSE	FALSE	FALSE
ENOG411CUA1	0	1	1	10	0.9226215573892205	2.3323531750776914	0.5432913045507926	1.907247272421294	0.5	5.5	2.3016147059182215	ENOG411CUA1	148223555, 148237570, Xelaev18047095m.g, Xelaev18044576m.g, Xelaev18030811m.g, Xelaev18032925m.g	GenBank, Xenbase_9.1	stam2.S, stam2.L, stam.L, stam.S	signal transducing adaptor molecule (SH3 domain and ITAM motif) 1 [Xenopus laevis], signal transducing adaptor molecule (SH3 domain and ITAM motif) 2 [Xenopus laevis], NA	O75886, Q92783	STAM2, STAM	HBP, STAM1	signal transducing adaptor molecule (SH3 domain and ITAM motif)	0.010678455035803258	0.16410453313642479	FALSE	FALSE	FALSE
ENOG411CW3G	4	5	11	18	1.2640953928779595	1.983624394468825	0.8063257103845864	1.1107806665064264	4.5	14.5	2.296484685026643	ENOG411CW3G	111185516, 349585432	GenBank	NA	Eif2b3 protein [Xenopus laevis], eukaryotic translation initiation factor 2B, subunit 3 gamma [Xenopus laevis]	Q9NR50	EIF2B3	NA	Eukaryotic translation initiation factor 2B, subunit 3 gamma, 58kDa	0.010824091919480165	0.1653921245296569	FALSE	FALSE	FALSE
ENOG411CVID	4	3	9	16	0.8459472136748417	2.3967957965056286	0.5432913045507926	1.5352784950343363	3.5	12.5	2.292965572143888	ENOG411CVID	148224361	GenBank	NA	translocase of inner mitochondrial membrane 44 [Xenopus laevis]	O43615	TIMM44	MIMT44 TIM44	Translocase of inner mitochondrial membrane 44 homolog (Yeast)	0.010924993558876236	0.1659124137788647	FALSE	FALSE	FALSE
ENOG411CR84	0	2	3	9	1.5980745634395823	1.6418628635537411	1.5432913045507926	1.1847812479502031	1	6	2.290981725247074	ENOG411CR84	148231079, Xelaev18039043m.g, Xelaev18042350m.g	GenBank, Xenbase_9.1	arhgap35.L, arhgap35.S	Rho GTPase activating protein 35 [Xenopus laevis], NA	Q9NRY4	ARHGAP35	GRF1 GRLF1 KIAA1722 P190A p190ARHOGAP	Rho GTPase activating protein 35	0.010982235317449159	0.1659124137788647	FALSE	FALSE	FALSE
ENOG411CUXP	1	1	4	9	1.0630801652182171	2.157958478269589	0.8652193994381551	1.7697437486713592	1	6.5	2.277618267274146	ENOG411CUXP	124481730	GenBank	NA	LOC100037138 protein [Xenopus laevis]	P57740	NUP107	NA	Nucleoporin 107kDa	0.011374665585224803	0.17087559424096138	FALSE	FALSE	FALSE
ENOG411CQBX	2	2	6	12	1.0284923925464566	2.1861716231365547	0.7656837258872404	1.563292871203933	2	9	2.2731107247258353	ENOG411CQBX	147905450, 148233493, 1709571, 1709573, 1709575, 213625101, 755872, Xelaev18026530m.g, Xelaev18039591m.g, Xelaev18041275m.g	GenBank, Xenbase_9.1	papolg.L, papola.L, papola.S	poly(A) polymerase gamma [Xenopus laevis], poly(A) polymerase alpha-B [Xenopus laevis], RecName: Full=Poly(A) polymerase alpha-A; Short=PAP-alpha-A; AltName: Full=Polynucleotide adenylyltransferase alpha-A, RecName: Full=Poly(A) polymerase alpha-B; Short=PAP-alpha-B; AltName: Full=Polynucleotide adenylyltransferase alpha-B, RecName: Full=Poly(A) polymerase type 3; Short=PAP; AltName: Full=Polynuc…	Q9BWT3, P51003	PAPOLG, PAPOLA	PAP2 PAPG, PAP	PolyA polymerase	0.011509754150558707	0.17193900893069264	FALSE	FALSE	FALSE
ENOG411CR1F	20	36	42	73	1.5863854005363824	1.620142685008278	0.5772386364741303	0.447815653783997	28	57.5	2.2673577533537475	ENOG411CR1F	148222563, 148235681, Xelaev18025912m.g, Xelaev18024004m.g, Xelaev18020889m.g	GenBank, Xenbase_9.1	copg1.S, copg1.L, copg2.S	coatomer subunit gamma-2 [Xenopus laevis], coatomer protein complex, subunit gamma [Xenopus laevis], NA	Q9Y678, Q9UBF2	COPG1, COPG2	COPG, NA	The coatomer is a cytosolic protein complex that binds to dilysine motifs and reversibly associates with Golgi non- clathrin-coated vesicles, which further mediate biosynthetic protein transport from the ER, via the Golgi up to the trans Golgi network. Coatomer complex is required for budding from Golgi membranes, and is essential for the retrograde Golgi-to-ER transport of dilysine-tagged protei…	0.011684190027345158	0.17357513407289418	FALSE	FALSE	FALSE
ENOG411CP9D	1	3	7	10	1.8191648725954959	1.3807234109856308	1.5432913045507926	0.9072472724212941	2	8.5	2.2626627043595966	ENOG411CP9D	147904396, Xelaev18037984m.g, Xelaev18036416m.g	GenBank, Xenbase_9.1	akr7a2.S, akr7a2.L	aldo-keto reductase family 7, member A2 (aflatoxin aldehyde reductase) [Xenopus laevis], NA	O43488, Q8NHP1, O95154	AKR7A2, AKR7L, AKR7A3	AFAR AFAR1 AKR7, AFAR3 AKR7A4, AFAR2	aldo-keto reductase family 7, member A2 (aflatoxin aldehyde reductase)	0.011828244774934982	0.17424701167563258	FALSE	FALSE	FALSE
ENOG411CTR8	1	4	8	11	2.022727217053003	1.164755850329719	1.7132163059931051	0.7108500596177907	2.5	9.5	2.2538908918636196	ENOG411CTR8	122831054, 169642016, Xelaev18034197m.g, Xelaev18036601m.g	GenBank, Xenbase_9.1	zyx.L, zyx.S	zyxin [Xenopus laevis], LOC100158313 protein [Xenopus laevis], NA	Q15942	ZYX	NA	Adhesion plaque protein. Binds alpha-actinin and the CRP protein. Important for targeting TES and ENA VASP family members to focal adhesions and for the formation of actin-rich structures. May be a component of a signal transduction pathway that mediates adhesion-stimulated changes in gene expression (By similarity)	0.012101516408815443	0.17424701167563258	FALSE	FALSE	FALSE
ENOG411CT0X	0	0	3	3	1.5980745634395823	1.5785269911948188	1.5432913045507926	1.447815653783997	0	3	2.246196500409714	ENOG411CT0X	148222228, Xelaev18009133m.g, Xelaev18005377m.g	GenBank, Xenbase_9.1	trappc11.S, trappc11.L	uncharacterized protein LOC495307 [Xenopus laevis], NA	Q7Z392	TRAPPC11	C4orf41	trafficking protein particle complex 11	0.012345712152342427	0.17424701167563258	FALSE	FALSE	FALSE
ENOG411CTB2	0	0	3	3	1.5980745634395823	1.5785269911948188	1.5432913045507926	1.447815653783997	0	3	2.246196500409714	ENOG411CTB2	148228943, 148921509, Xelaev18013591m.g, Xelaev18016054m.g, Xelaev18044713m.g, Xelaev18033036m.g, Xelaev18047184m.g	GenBank, Xenbase_9.1	sp7.L, sp7.S, sp9.L, sp8.S, sp9.S	transcription factor Sp8 [Xenopus laevis], LOC100101324 protein [Xenopus laevis], NA	P0CG40, Q8IXZ3, Q8TDD2, F8VV67	SP9, SP8, SP7	NA, OSX	transcription factor	0.012345712152342427	0.17424701167563258	FALSE	FALSE	FALSE
ENOG411CRGF	0	0	3	3	1.5980745634395823	1.5785269911948188	1.5432913045507926	1.447815653783997	0	3	2.246196500409714	ENOG411CRGF	148229463, Xelaev18022802m.g, Xelaev18025015m.g	GenBank, Xenbase_9.1	fhod1.L, fhod1.S	formin homology 2 domain containing 1 [Xenopus laevis], NA	NA	NA	NA	formin homology 2 domain containing 1	0.012345712152342427	0.17424701167563258	FALSE	FALSE	FALSE
ENOG411CWR6	0	0	3	3	1.5980745634395823	1.5785269911948188	1.5432913045507926	1.447815653783997	0	3	2.246196500409714	ENOG411CWR6	Xelaev18010559m.g, Xelaev18007717m.g	Xenbase_9.1	ankle2.S, ankle2.L	NA	Q86XL3	ANKLE2	KIAA0692 LEM4	ankyrin repeat and LEM domain containing 2	0.012345712152342427	0.17424701167563258	FALSE	FALSE	FALSE
ENOG411D31G	0	0	3	3	1.5980745634395823	1.5785269911948188	1.5432913045507926	1.447815653783997	0	3	2.246196500409714	ENOG411D31G	148223027, Xelaev18039064m.g, Xelaev18042364m.g	GenBank, Xenbase_9.1	opa3.L, opa3.S	optic atrophy 3 protein homolog [Xenopus laevis], NA	Q9H6K4	OPA3	NA	optic atrophy 3 (autosomal recessive, with chorea and spastic paraplegia)	0.012345712152342427	0.17424701167563258	FALSE	FALSE	FALSE
ENOG411CS2G	0	0	3	3	1.5980745634395823	1.5785269911948188	1.5432913045507926	1.447815653783997	0	3	2.246196500409714	ENOG411CS2G	148235556, 62826031, Xelaev18006255m.g	GenBank, Xenbase_9.1	wdr18.L	WD repeat domain 18 [Xenopus laevis], LOC733228 protein [Xenopus laevis], NA	NA	WDR18	WDR18	WD repeat domain 18	0.012345712152342427	0.17424701167563258	FALSE	FALSE	FALSE
ENOG411CU3P	0	0	3	3	1.5980745634395823	1.5785269911948188	1.5432913045507926	1.447815653783997	0	3	2.246196500409714	ENOG411CU3P	147902900, 148232413, 148233276, Xelaev18002618m.g, Xelaev18038572m.g, Xelaev18021300m.g, Xelaev18041885m.g, Xelaev18017387m.g	GenBank, Xenbase_9.1	Xelaev18002618m.g, Xelaev18038572m.g, nt5dc3.S, Xelaev18041885m.g, nt5dc3.L	hypothetical protein LOC380012 [Xenopus laevis], 5'-nucleotidase domain-containing protein 3 [Xenopus laevis], 5'-nucleotidase domain containing 2 [Xenopus laevis], NA	Q9H857, Q86UY8	NT5DC2, NT5DC3	NA, GNN TU12B1-TY	5'-nucleotidase domain containing	0.012345712152342427	0.17424701167563258	FALSE	FALSE	FALSE
ENOG411CXG1	0	3	3	11	1.5980745634395823	1.5741026144820363	1.5432913045507926	1.032778154505153	1.5	7	2.2430679936335816	ENOG411CXG1	126631410, 147899686	GenBank	NA	LOC100049109 protein [Xenopus laevis], Rae1/Gle2 protein [Xenopus laevis]	P78406	RAE1	MRNP41	RAE1 RNA export 1 homolog (S. pombe)	0.012446215119688043	0.17424701167563258	FALSE	FALSE	FALSE
ENOG411CSD3	0	3	3	11	1.5980745634395823	1.5741026144820363	1.5432913045507926	1.032778154505153	1.5	7	2.2430679936335816	ENOG411CSD3	148227642, Xelaev18041649m.g, Xelaev18003332m.g	GenBank, Xenbase_9.1	ppp2r4-like.S, ppp2r4.L	protein phosphatase 2A activator, regulatory subunit 4 [Xenopus laevis], NA	Q15257	PTPA	PPP2R4	protein phosphatase 2A activator, regulatory subunit 4	0.012446215119688043	0.17424701167563258	FALSE	FALSE	FALSE
ENOG411CQI7	2	0	4	9	0.43419275757670456	2.7342208434957653	0.2802568987169987	2.769743748671359	1	6.5	2.2404067429220316	ENOG411CQI7	147900632, Xelaev18042288m.g, Xelaev18038957m.g	GenBank, Xenbase_9.1	nsdhl.S, nsdhl.L	NAD(P) dependent steroid dehydrogenase-like [Xenopus laevis], NA	Q15738	NSDHL	H105E3	NAD(P) dependent steroid dehydrogenase-like	0.012532264465832697	0.17453789157102412	FALSE	FALSE	FALSE
ENOG411CSVZ	4	4	14	12	1.8065626587262802	1.3556436331960844	1.1282538052719489	0.8263272770377267	4	13	2.236017512529071	ENOG411CSVZ	113817461, Xelaev18043759m.g, Xelaev18002050m.g	GenBank, Xenbase_9.1	hgs.L, hgs.S	MGC68804 protein [Xenopus laevis], NA	O14964	HGS	HRS	Hepatocyte growth factor-regulated tyrosine kinase substrate	0.012675312017283464	0.1756154628715854	FALSE	FALSE	FALSE
ENOG411D0E2	0	0	1	6	0.9226215573892205	2.232428122919567	0.5432913045507926	2.255170575841601	0	3.5	2.230957023926792	ENOG411D0E2	Xelaev18030736m.g, Xelaev18032879m.g	Xenbase_9.1	svil.L, svil.S	NA	O95425	SVIL	NA	supervillin	0.01284198794145412	0.177007606986847	FALSE	FALSE	FALSE
ENOG411CYSD	0	1	3	6	1.5980745634395823	1.5457697762129996	1.5432913045507926	1.2551705758416012	0.5	4.5	2.2230336515632843	ENOG411CYSD	148226883, Xelaev18019141m.g	GenBank, Xenbase_9.1	pelp1.L	proline-, glutamic acid- and leucine-rich protein 1 [Xenopus laevis], NA	Q8IZL8	PELP1	HMX3 MNAR	proline, glutamate and leucine rich protein 1	0.013106765455736918	0.1797307221981565	FALSE	FALSE	FALSE
ENOG411CSNW	0	4	3	13	1.5980745634395823	1.5362409526750611	1.5432913045507926	0.9332424809542387	2	8	2.2162957558228777	ENOG411CSNW	146327494, 147898909, Xelaev18042144m.g	GenBank, Xenbase_9.1	psmd10.S	LOC100049745 protein [Xenopus laevis], proteasome (prosome, macropain) 26S subunit, non-ATPase, 10 [Xenopus laevis], NA	O75832	PSMD10	NA	Proteasome (Prosome, macropain) 26S subunit, non-ATPase, 10	0.01333562675663143	0.18049980342511396	FALSE	FALSE	FALSE
ENOG411CX81	5	6	15	17	1.6264772663191724	1.5060600203774834	0.9583288038296363	0.8103857331687053	5.5	16	2.2150383577429134	ENOG411CX81	147902158, 148222603, 28277248, Xelaev18013442m.g, Xelaev18015937m.g	GenBank, Xenbase_9.1	dctn2.L, dctn2.S	dynactin subunit 2-B [Xenopus laevis], dynactin subunit 2-A [Xenopus laevis], Dctn2-prov protein [Xenopus laevis], NA	Q13561	DCTN2	DCTN50	Dynactin 2 (P50)	0.013378715910713898	0.18049980342511396	FALSE	FALSE	FALSE
ENOG411CSJA	0	0	2	4	1.3048031678308571	1.822740620542688	1.1282538052719489	1.7697437486713592	0	3	2.2115074212167984	ENOG411CSJA	114108104, Xelaev18026613m.g	GenBank, Xenbase_9.1	dusp12.L	Dusp12 protein [Xenopus laevis], NA	Q9UNI6	DUSP12	NA	dual specificity phosphatase 12	0.01350035926889409	0.18049980342511396	FALSE	FALSE	FALSE
ENOG411CTRN	0	0	2	4	1.3048031678308571	1.822740620542688	1.1282538052719489	1.7697437486713592	0	3	2.2115074212167984	ENOG411CTRN	28839642, 349501039, 349501040, 50417706, Xelaev18042467m.g	GenBank, Xenbase_9.1	abhd16a.S	Bat5-prov protein [Xenopus laevis], abhydrolase domain-containing protein 16A [Xenopus laevis], NA	O95870	ABHD16A	BAT5 G5 NG26	Abhydrolase domain containing	0.01350035926889409	0.18049980342511396	FALSE	FALSE	FALSE
ENOG411CUVJ	0	0	2	4	1.3048031678308571	1.822740620542688	1.1282538052719489	1.7697437486713592	0	3	2.2115074212167984	ENOG411CUVJ	148226857	GenBank	NA	carbonic anhydrase VB, mitochondrial [Xenopus laevis]	Q9Y2D0, P35218	CA5B, CA5A	NA, CA5	carbonic anhydrase	0.01350035926889409	0.18049980342511396	FALSE	FALSE	FALSE
ENOG411CXDQ	0	2	7	5	2.441243282114779	0.6802222002387145	2.5432913045507926	0.447815653783997	1	6	2.2072094098118926	ENOG411CXDQ	118763664, 126631294, 148236661, 50603946, 52430491, Xelaev18044363m.g	GenBank, Xenbase_9.1	clasp1.L	Clasp1b protein [Xenopus laevis], Clasp1a protein [Xenopus laevis], CLIP-associating protein 1-A [Xenopus laevis], NA	Q7Z460, O75122	CLASP1, CLASP2	KIAA0622 MAST1, KIAA0627	cytoplasmic linker associated protein	0.013649716338721236	0.18158876363055018	FALSE	FALSE	FALSE
ENOG411CXHK	1	3	5	12	1.3471557549751167	1.756075445036376	1.1282538052719489	1.1482553719250892	2	8.5	2.1943158251177937	ENOG411CXHK	Xelaev18012743m.g	Xenbase_9.1	gemin4.L	NA	P57678	GEMIN4	NA	Gem (Nuclear organelle) associated protein 4	0.01410635627542454	0.18673463703210505	FALSE	FALSE	FALSE
ENOG411CY0R	0	1	1	9	0.9226215573892205	2.157958478269589	0.5432913045507926	1.7697437486713592	0.5	5	2.1782990332022405	ENOG411CY0R	148226567, 148234696, Xelaev18041364m.g	GenBank, Xenbase_9.1	irf2bpl.S	interferon regulatory factor 2-binding protein-like A [Xenopus laevis], interferon regulatory factor 2-binding protein-like B [Xenopus laevis], NA	Q8IU81, Q9H1B7	IRF2BP1, IRF2BPL	NA, C14orf4 EAP1 KIAA1865	Interferon regulatory factor 2 binding	0.014691890554578006	0.1935276617878896	FALSE	FALSE	FALSE
ENOG411CXJA	25	37	48	76	1.3413312222723277	1.7188883113004543	0.4575614305249088	0.46667468103531273	31	62	2.1639019841088474	ENOG411CXJA	114108108, 12004634, 148236729, Xelaev18037847m.g	GenBank, Xenbase_9.1	ruvbl2.S	LOC398205 protein [Xenopus laevis], reptin [Xenopus laevis], RuvB-like protein 2 [Xenopus laevis], NA	Q9Y230	RUVBL2	INO80J TIP48 TIP49B	RuvB-like 2 (E. coli)	0.015235936319704615	0.19971026332789285	FALSE	FALSE	FALSE
ENOG411D10F	1	6	10	12	2.3861234292826206	0.6281830989139404	2.00272292318809	0.340900449867485	3.5	11	2.131436586662667	ENOG411D10F	117608, 118764077, 148225136, 148231075	GenBank	NA	RecName: Full=Catenin beta; AltName: Full=Beta-catenin, Ctnnb1 protein [Xenopus laevis], catenin beta [Xenopus laevis], catenin (cadherin-associated protein), beta 1, 88kDa [Xenopus laevis]	P35222	CTNNB1	CTNNB	Armadillo/beta-catenin-like repeat	0.016526595718028406	0.21557130219516074	FALSE	FALSE	FALSE
ENOG411DCD3	0	8	12	11	3.196573579144807	-0.23029494044649795	3.2437310226918847	-0.13714684693715937	4	11.5	2.097475740312375	ENOG411DCD3	148234217, Xelaev18021076m.g	GenBank, Xenbase_9.1	tes.S	testin [Xenopus laevis], NA	Q9UGI8	TES	NA	Testis derived transcript (3 LIM domains)	0.017975741254778865	0.22988006474115272	FALSE	FALSE	FALSE
ENOG411CTSI	0	0	1	5	0.9226215573892205	2.0379023504666143	0.5432913045507926	2.032778154505153	0	3	2.0934065311097583	ENOG411CTSI	148229521, Xelaev18012838m.g	GenBank, Xenbase_9.1	kiaa1524.L	protein CIP2A homolog [Xenopus laevis], NA	Q8TCG1	CIP2A	KIAA1524	kiaa1524	0.018156439952390337	0.22988006474115272	FALSE	FALSE	FALSE
ENOG411CUF6	0	0	1	5	0.9226215573892205	2.0379023504666143	0.5432913045507926	2.032778154505153	0	3	2.0934065311097583	ENOG411CUF6	Xelaev18018579m.g, Xelaev18020310m.g	Xenbase_9.1	nup133.L, nup133.S	NA	Q8WUM0	NUP133	NA	Nucleoporin 133kDa	0.018156439952390337	0.22988006474115272	FALSE	FALSE	FALSE
ENOG411CSBF	0	0	1	5	0.9226215573892205	2.0379023504666143	0.5432913045507926	2.032778154505153	0	3	2.0934065311097583	ENOG411CSBF	147899348, 148235409, Xelaev18041357m.g, Xelaev18026454m.g, Xelaev18039489m.g	GenBank, Xenbase_9.1	sptlc2.S, sptlc3-like.L, sptlc2.L	serine palmitoyltransferase, long chain base subunit 2 [Xenopus laevis], serine palmitoyltransferase, long chain base subunit 3 [Xenopus laevis], NA	O15270, Q9NUV7	SPTLC2, SPTLC3	KIAA0526 LCB2, C20orf38 SPTLC2L	serine palmitoyltransferase, long chain base subunit	0.018156439952390337	0.22988006474115272	FALSE	FALSE	FALSE
ENOG411CQJ7	0	0	1	5	0.9226215573892205	2.0379023504666143	0.5432913045507926	2.032778154505153	0	3	2.0934065311097583	ENOG411CQJ7	147903314, Xelaev18021910m.g	GenBank, Xenbase_9.1	tfip11.L	tuftelin-interacting protein 11 [Xenopus laevis], NA	Q9UBB9	TFIP11	STIP	May play a role in the differentiation of ameloblasts and odontoblasts or in the forming of the enamel extracellular matrix. May also be involved in pre-mRNA splicing (By similarity)	0.018156439952390337	0.22988006474115272	FALSE	FALSE	FALSE
ENOG411CVF8	0	0	1	5	0.9226215573892205	2.0379023504666143	0.5432913045507926	2.032778154505153	0	3	2.0934065311097583	ENOG411CVF8	147899268, 148231776, Xelaev18019730m.g, Xelaev18014684m.g, Xelaev18016646m.g	GenBank, Xenbase_9.1	stk38l.S, stk38-like.S, stk38l.L	serine/threonine kinase 38 [Xenopus laevis], serine/threonine kinase 38 like [Xenopus laevis], NA	Q15208, Q9Y2H1	STK38, STK38L	NDR1, KIAA0965 NDR2	Serine Threonine Kinase 38	0.018156439952390337	0.22988006474115272	FALSE	FALSE	FALSE
ENOG411CZ3H	4	7	12	19	1.4546796099312627	1.5036627089054027	0.9218029278045223	0.7697437486713592	5.5	15.5	2.0918639147205416	ENOG411CZ3H	Xelaev18042855m.g, Xelaev18040748m.g, Xelaev18003316m.g	Xenbase_9.1	None	NA	O00303	EIF3F	EIF3S5	Component of the eukaryotic translation initiation factor 3 (eIF-3) complex, which is required for several steps in the initiation of protein synthesis. The eIF-3 complex associates with the 40S ribosome and facilitates the recruitment of eIF-1, eIF-1A, eIF-2 GTP methionyl-tRNAi and eIF-5 to form the 43S preinitiation complex (43S PIC). The eIF-3 complex stimulates mRNA recruitment to the 43S PIC…	0.01822534544694255	0.22988006474115272	FALSE	FALSE	FALSE
ENOG411CRUN	1	4	6	12	1.5959913177930014	1.3556436331960844	1.3506462266083967	0.8263272770377267	2.5	9	2.0871210894316055	ENOG411CRUN	146327763, Xelaev18016662m.g, Xelaev18016661m.g	GenBank, Xenbase_9.1	atxn10.L, Xelaev18016661m.g	LOC100049766 protein [Xenopus laevis], NA	Q9UBB4	ATXN10	SCA10	ataxin 10	0.018438595077329152	0.23147794946844202	FALSE	FALSE	FALSE
ENOG411CXQS	1	7	6	18	1.5959913177930014	1.35112392287267	1.3506462266083967	0.6957431672275823	4	12	2.08392517161292	ENOG411CXQS	147906148, 148238026, Xelaev18006638m.g, Xelaev18001143m.g, Xelaev18008623m.g	GenBank, Xenbase_9.1	ncln.L, ncln.S, loc101730472.L	nicalin [Xenopus laevis], MGC79091 protein [Xenopus laevis], NA	Q969V3	NCLN	NA	Nicalin homolog (Zebrafish)	0.018583487147413248	0.23220675061767768	FALSE	FALSE	FALSE
ENOG411CWZN	0	2	1	11	0.9226215573892205	2.015892331849103	0.5432913045507926	1.447815653783997	1	6	2.077843097691274	ENOG411CWZN	148232415, 27882062	GenBank	NA	notchless homolog 1 [Xenopus laevis], Nle-pending-prov protein [Xenopus laevis]	Q9NVX2	NLE1	NA	notchless homolog 1 (Drosophila)	0.01886190644187986	0.23417211796949486	FALSE	FALSE	FALSE
ENOG411CRFD	20	24	36	56	0.9287164362151061	2.0081412255346685	0.3604272474009822	0.6368494781740138	22	46	2.0766719680029335	ENOG411CRFD	111598535, 147899436, 147907116, 148230593, 1708482, 1708484, Xelaev18045061m.g	GenBank, Xenbase_9.1	kpna7.L	LOC398027 protein [Xenopus laevis], karyopherin alpha 2 (RAG cohort 1, importin alpha 1) [Xenopus laevis], importin subunit alpha-1 [Xenopus laevis], karyopherin alpha-2 subunit like [Xenopus laevis], RecName: Full=Importin subunit alpha-1; AltName: Full=Karyopherin subunit alpha-1, RecName: Full=Importin subunit alpha-2; AltName: Full=Karyopherin subunit alpha-2, NA	P52292, A9QM74	KPNA2, KPNA7	RCH1 SRP1, NA	Karyopherin alpha 2 (RAG cohort 1, importin alpha 1)	0.01891592276791731	0.23417211796949486	FALSE	FALSE	FALSE
ENOG411CZH5	3	10	11	23	1.6595605818578167	1.2493918562026316	1.1282538052719489	0.5733465358678558	6.5	17	2.0569399951016836	ENOG411CZH5	115528650, 132173, 147900380, 2134146, 47682592, 48735020, Xelaev18015101m.g	GenBank, Xenbase_9.1	rcc1.S	Chc1-a protein [Xenopus laevis], RecName: Full=Regulator of chromosome condensation, regulator of chromosome condensation 1 [Xenopus laevis], RCC1 protein - African clawed frog (fragment), Chc1-a-prov protein [Xenopus laevis], Chc1-b-prov protein [Xenopus laevis], NA	P18754	RCC1	CHC1	Regulator of chromosome condensation 1	0.01984599908835868	0.24455392425009728	FALSE	FALSE	FALSE
ENOG411CQ5D	0	1	3	5	1.5980745634395823	1.297537405746528	1.5432913045507926	1.032778154505153	0.5	4	2.047506859096431	ENOG411CQ5D	Xelaev18025023m.g, Xelaev18022765m.g	Xenbase_9.1	phkb.S, phkb.L	NA	Q93100	PHKB	NA	phosphorylase kinase beta	0.02030417204780548	0.2464106750880071	FALSE	FALSE	FALSE
ENOG411CY2J	0	0	3	2	1.5980745634395823	1.2888515295454006	1.5432913045507926	1.032778154505153	0	2.5	2.041365017134067	ENOG411CY2J	12082247, 148229513, 16209558, 28804566, 313661062, Xelaev18012056m.g, Xelaev18030116m.g, Xelaev18028098m.g	GenBank, Xenbase_9.1	pum1.L, pum2.S, pum2.L	pumilio [Xenopus laevis], pumilio homolog 1 [Xenopus laevis], pumilio-like protein 1 [Xenopus laevis], Pumilio [Xenopus laevis], Pumilio2 [Xenopus laevis], NA	Q14671, Q8TB72	PUM1, PUM2	KIAA0099 PUMH1, KIAA0235 PUMH2	pumilio homolog	0.020607279473228483	0.2464106750880071	FALSE	FALSE	FALSE
ENOG411CWIC	1	0	4	4	1.0630801652182171	1.822740620542688	0.8652193994381551	1.7697437486713592	0.5	4	2.040583446900627	ENOG411CWIC	Xelaev18015397m.g, Xelaev18012807m.g	Xenbase_9.1	ankfy1.S, ankfy1.L	NA	Q9P2R3	ANKFY1	ANKHZN KIAA1255	ankyrin repeat and FYVE domain containing 1	0.020646124445530163	0.2464106750880071	FALSE	FALSE	FALSE
ENOG411CWMH	24	74	55	123	2.1649134523598472	0.7194505834345867	0.7067900368336719	0.17319327367499127	49	89	2.0395533691208416	ENOG411CWMH	148234431, Xelaev18025750m.g, Xelaev18023766m.g	GenBank, Xenbase_9.1	iars.S, iars.L	isoleucyl-tRNA synthetase [Xenopus laevis], NA	P41252	IARS	NA	Isoleucyl-tRNA synthetase	0.020697415258135825	0.2464106750880071	FALSE	FALSE	FALSE
ENOG411CQ7X	0	0	2	3	1.3048031678308571	1.5785269911948188	1.1282538052719489	1.447815653783997	0	2.5	2.038822307846742	ENOG411CQ7X	120538078, 148233484	GenBank	NA	LOC100036945 protein [Xenopus laevis], DnaJ (Hsp40) homolog, subfamily B, member 11 [Xenopus laevis]	Q9UBS4, H7C2Y5	DNAJB11, NA	EDJ ERJ3 HDJ9, NA	DnaJ (Hsp40) homolog, subfamily B, member 11	0.020733882533583246	0.2464106750880071	FALSE	FALSE	FALSE
ENOG411CZ8X	0	0	2	3	1.3048031678308571	1.5785269911948188	1.1282538052719489	1.447815653783997	0	2.5	2.038822307846742	ENOG411CZ8X	147905290, Xelaev18023197m.g	GenBank, Xenbase_9.1	ndc1.L	nucleoporin NDC1 [Xenopus laevis], NA	Q9BTX1	NDC1	TMEM48	Transmembrane protein 48	0.020733882533583246	0.2464106750880071	FALSE	FALSE	FALSE
ENOG411CRG4	0	0	2	3	1.3048031678308571	1.5785269911948188	1.1282538052719489	1.447815653783997	0	2.5	2.038822307846742	ENOG411CRG4	Xelaev18047958m.g	Xenbase_9.1	ppil3.S	NA	Q9H2H8	PPIL3	NA	PPIases accelerate the folding of proteins (By similarity)	0.020733882533583246	0.2464106750880071	FALSE	FALSE	FALSE
ENOG411D0ME	0	0	2	3	1.3048031678308571	1.5785269911948188	1.1282538052719489	1.447815653783997	0	2.5	2.038822307846742	ENOG411D0ME	Xelaev18031352m.g	Xenbase_9.1	exoc3.L	NA	O60645	EXOC3	SEC6 SEC6L1	Exocyst complex component 3	0.020733882533583246	0.2464106750880071	FALSE	FALSE	FALSE
ENOG411CT4Q	20	39	42	74	1.5863854005363824	1.2876660450732744	0.5772386364741303	0.35470624939251527	29.5	58	2.0322612666695883	ENOG411CT4Q	66912037, Xelaev18021503m.g	GenBank, Xenbase_9.1	rars.S	LOC733251 protein [Xenopus laevis], NA	P54136	RARS	NA	Arginyl-tRNA synthetase	0.021063606720076504	0.24922161225435652	FALSE	FALSE	FALSE
ENOG411CQAK	4	8	10	23	1.06181544693331	1.784358777545492	0.6807948283007275	0.8628531530628406	6	16.5	2.0125490945673237	ENOG411CQAK	148228442, 148229654, 148230348, 32450205, 52430509, Xelaev18046869m.g	GenBank, Xenbase_9.1	ddx5.S	DEAD (Asp-Glu-Ala-Asp) box polypeptide 17 [Xenopus laevis], DEAD (Asp-Glu-Ala-Asp) box polypeptide 5 [Xenopus laevis], similar to DEAD/H (Asp-Glu-Ala-Asp/His) box polypeptide 5 (RNA helicase, 68kDa) [Xenopus laevis], LOC398649 protein [Xenopus laevis], DDX5 protein [Xenopus laevis], NA	Q92841, P17844	DDX17, DDX5	NA, G17P1 HELR HLR1	DEAD (Asp-Glu-Ala-Asp) box helicase	0.022081043451883397	0.25925812652105246	FALSE	FALSE	FALSE
ENOG411CS0Y	2	0	4	7	0.43419275757670456	2.411317352187284	0.2802568987169987	2.447815653783997	1	5.5	2.0120794945489933	ENOG411CS0Y	12718857, 1333647, 1381671, 147906869, 148224335, 148226017, 148231259, 19338696, 19338700, 57921048, Xelaev18016154m.g, Xelaev18013701m.g, Xelaev18009255m.g, Xelaev18005523m.g	GenBank, Xenbase_9.1	smad9.S, smad9.L, smad1.S, smad1.L	Smad protein [Xenopus laevis], Mad1 [Xenopus laevis], mothers against DPP [Xenopus laevis], SMAD family member 1 [Xenopus laevis], SMAD family member 9 [Xenopus laevis], Smad8C protein [Xenopus laevis], Smad8A [Xenopus laevis], Smad8C [Xenopus laevis], MADH1 protein [Xenopus laevis], NA	Q99717, Q15797, O15198	SMAD5, SMAD1, SMAD9	MADH5, BSP1 MADH1 MADR1, MADH6 MADH9 SMAD8	SMAD family member	0.02210577892550485	0.25925812652105246	FALSE	FALSE	FALSE
ENOG411CXWY	0	19	5	35	2.06316626569203	0.7766095891323678	2.128253805271949	0.29581256033894676	9.5	20	2.0080247639961564	ENOG411CXWY	148224080, 148233772, Xelaev18033225m.g, Xelaev18000268m.g	GenBank, Xenbase_9.1	Xelaev18033225m.g, Xelaev18000268m.g	cullin 1 [Xenopus laevis], uncharacterized protein LOC734526 [Xenopus laevis], NA	Q13616	CUL1	NA	Cullin 1	0.02232033009975941	0.2606312781081077	FALSE	FALSE	FALSE
ENOG411CWK8	3	7	8	21	1.0374882177512812	1.7935210323904256	0.7132163059931051	0.9072472724212941	5	14.5	2.0018258383770435	ENOG411CWK8	148236863, Xelaev18026119m.g	GenBank, Xenbase_9.1	msh6.L	mutS homolog 6 [Xenopus laevis], NA	P52701	MSH6	GTBP	MutS homolog 6 (E. coli)	0.02265173299415774	0.26335101750599044	FALSE	FALSE	FALSE
ENOG411CQQW	3	12	11	26	1.6595605818578167	1.160598052668242	1.1282538052719489	0.5022634378063733	7.5	18.5	1.99415329449517	ENOG411CQQW	147899029	GenBank	NA	acyl-CoA thioesterase 9 [Xenopus laevis]	Q9Y305	ACOT9	NA	Acyl-CoA thioesterase 9	0.02306765225528262	0.26702555034902914	FALSE	FALSE	FALSE
ENOG411CSH4	0	4	5	9	2.06316626569203	0.7455544901221587	2.128253805271949	0.4478156537839968	2	7	1.9860654928956178	ENOG411CSH4	118764339, 163638968, 47938721, 62739288, 83405203, Xelaev18006024m.g, Xelaev18010073m.g	GenBank, Xenbase_9.1	uhrf1.L, uhrf2.S	Uhrf2 protein [Xenopus laevis], RING finger domain protein Np95 [Xenopus laevis], LOC432234 protein [Xenopus laevis], NA	Q96T88, Q96PU4	UHRF1, UHRF2	ICBP90 NP95 RNF106, NIRF RNF107	ubiquitin-like with PHD and ring finger domains	0.023513026116268355	0.26995960957894544	FALSE	FALSE	FALSE
ENOG411CW0Z	0	7	2	19	1.3048031678308571	1.5036627089054027	1.1282538052719489	0.7697437486713592	3.5	10.5	1.9858852661712316	ENOG411CW0Z	148229066, Xelaev18030721m.g, Xelaev18032859m.g	GenBank, Xenbase_9.1	cul2.L, cul2.S	cullin 2 [Xenopus laevis], NA	Q13617	CUL2	NA	Cullin 2	0.023523032547454855	0.26995960957894544	FALSE	FALSE	FALSE
ENOG411CX7K	2	0	5	5	0.7507393534712237	2.0379023504666143	0.5432913045507928	2.032778154505153	1	5	1.9718674591540537	ENOG411CX7K	126631948, Xelaev18028844m.g, Xelaev18026551m.g	GenBank, Xenbase_9.1	xrn2.S, xrn2.L	LOC100049102 protein [Xenopus laevis], NA	Q9H0D6	XRN2	NA	5'-3' exoribonuclease 2	0.02431236945972746	0.2778259655355181	FALSE	FALSE	FALSE
ENOG411CXK4	1	2	5	8	1.3471557549751167	1.4337719527834107	1.1282538052719489	1.032778154505153	1.5	6.5	1.9664128401456162	ENOG411CXK4	111185517, Xelaev18037678m.g, Xelaev18035897m.g	GenBank, Xenbase_9.1	u2af2.S, u2af2.L	U2af2 protein [Xenopus laevis], NA	P26368	U2AF2	U2AF65	U2 small nuclear RNA auxiliary factor 2	0.02462547071038564	0.28020641991306894	FALSE	FALSE	FALSE
ENOG411CR8Q	0	4	3	11	1.5980745634395823	1.164755850329719	1.5432913045507926	0.7108500596177907	2	7	1.953616120844708	ENOG411CR8Q	Xelaev18026661m.g	Xenbase_9.1	mtr.L	NA	Q99707	MTR	NA	5-methyltetrahydrofolate-homocysteine methyltransferase	0.025373316345267433	0.2836153876992508	FALSE	FALSE	FALSE
ENOG411CSK0	0	0	4	1	1.8453247825788208	0.911348329855701	1.8652193994381552	0.447815653783997	0	2.5	1.9492622513170763	ENOG411CSK0	148228358, Xelaev18021930m.g	GenBank, Xenbase_9.1	nup160.L	nucleoporin 160kDa [Xenopus laevis], NA	Q12769	NUP160	KIAA0197 NUP120	Nucleoporin 160kDa	0.02563205707362997	0.2836153876992508	FALSE	FALSE	FALSE
ENOG411CRST	7	11	18	25	1.4830529857815493	1.2702733031935656	0.7912188179943781	0.5632928712039329	9	21.5	1.9468956897534953	ENOG411CRST	147900404, 147906212, 148227816, Xelaev18022045m.g, Xelaev18037859m.g, Xelaev18024318m.g, Xelaev18036138m.g	GenBank, Xenbase_9.1	ppp6r3.L, ppp6r1.S, ppp6r3.S, ppp6r1.L	protein phosphatase 6, regulatory subunit 1 [Xenopus laevis], serine/threonine-protein phosphatase 6 regulatory subunit 3-A [Xenopus laevis], serine/threonine-protein phosphatase 6 regulatory subunit 3-B [Xenopus laevis], NA	Q5H9R7, Q9UPN7	PPP6R3, PPP6R1	C11orf23 KIAA1558 PP6R3 SAPL SAPS3, KIAA1115 PP6R1 SAPS1	Protein phosphatase 6, regulatory subunit	0.025773620752745502	0.2836153876992508	FALSE	FALSE	FALSE
ENOG411DCH0	0	0	1	4	0.9226215573892205	1.822740620542688	0.5432913045507926	1.7697437486713592	0	2.5	1.9412642128287214	ENOG411DCH0	147903968, 148233354, 161611778, Xelaev18029500m.g, Xelaev18034135m.g, Xelaev18032547m.g	GenBank, Xenbase_9.1	lrrc1.S, scrib.S, scrib.L	uncharacterized protein LOC495083 [Xenopus laevis], leucine rich repeat containing 1 [Xenopus laevis], LOC100127343 protein [Xenopus laevis], NA	Q9BTT6	LRRC1	LANO	leucine rich repeat containing 1	0.026113118981234404	0.2836153876992508	FALSE	FALSE	FALSE
ENOG411CWTY	0	0	1	4	0.9226215573892205	1.822740620542688	0.5432913045507926	1.7697437486713592	0	2.5	1.9412642128287214	ENOG411CWTY	Xelaev18043449m.g, Xelaev18046180m.g	Xenbase_9.1	adnp.L, adnp.S	NA	Q9H2P0	ADNP	ADNP1 KIAA0784	Activity-dependent neuroprotector homeobox	0.026113118981234404	0.2836153876992508	FALSE	FALSE	FALSE
ENOG411DGFH	0	0	1	4	0.9226215573892205	1.822740620542688	0.5432913045507926	1.7697437486713592	0	2.5	1.9412642128287214	ENOG411DGFH	147902762, Xelaev18013240m.g	GenBank, Xenbase_9.1	vwa8.L	uncharacterized protein LOC398849 [Xenopus laevis], NA	NA	NA	NA	von Willebrand factor A domain containing 8	0.026113118981234404	0.2836153876992508	FALSE	FALSE	FALSE
ENOG411CR63	0	0	1	4	0.9226215573892205	1.822740620542688	0.5432913045507926	1.7697437486713592	0	2.5	1.9412642128287214	ENOG411CR63	148233197, Xelaev18011764m.g	GenBank, Xenbase_9.1	asmtl.L	acetylserotonin O-methyltransferase-like [Xenopus laevis], NA	O95671	ASMTL	NA	acetylserotonin O-methyltransferase-like	0.026113118981234404	0.2836153876992508	FALSE	FALSE	FALSE
ENOG411CSUW	0	0	1	4	0.9226215573892205	1.822740620542688	0.5432913045507926	1.7697437486713592	0	2.5	1.9412642128287214	ENOG411CSUW	147903114	GenBank	NA	protein zwilch homolog [Xenopus laevis]	Q9H900	ZWILCH	NA	Zwilch, kinetochore associated, homolog (Drosophila)	0.026113118981234404	0.2836153876992508	FALSE	FALSE	FALSE
ENOG411CSYV	0	0	1	4	0.9226215573892205	1.822740620542688	0.5432913045507926	1.7697437486713592	0	2.5	1.9412642128287214	ENOG411CSYV	147898975, 148222347, 49118667, Xelaev18029701m.g, Xelaev18027573m.g	GenBank, Xenbase_9.1	ect2.S, ect2.L	epithelial cell transforming 2 [Xenopus laevis], epithelial cell transforming sequence 2 oncogene [Xenopus laevis], ECT2 protein [Xenopus laevis], NA	Q9H8V3	ECT2	NA	Epithelial cell transforming sequence 2 oncogene	0.026113118981234404	0.2836153876992508	FALSE	FALSE	FALSE
ENOG411CVWV	0	0	1	4	0.9226215573892205	1.822740620542688	0.5432913045507926	1.7697437486713592	0	2.5	1.9412642128287214	ENOG411CVWV	Xelaev18032208m.g, Xelaev18033881m.g	Xenbase_9.1	spag1.L, spag1.S	NA	Q07617	SPAG1	NA	Sperm associated antigen 1	0.026113118981234404	0.2836153876992508	FALSE	FALSE	FALSE
ENOG411CPJU	0	0	1	4	0.9226215573892205	1.822740620542688	0.5432913045507926	1.7697437486713592	0	2.5	1.9412642128287214	ENOG411CPJU	147903791, 148227180, Xelaev18017342m.g, Xelaev18021338m.g	GenBank, Xenbase_9.1	cdc23.L, cdc23.S	cell division cycle 23 homolog [Xenopus laevis], CDC23 (cell division cycle 23, yeast, homolog) [Xenopus laevis], NA	Q9UJX2	CDC23	ANAPC8	cell division cycle 23 homolog (S. cerevisiae)	0.026113118981234404	0.2836153876992508	FALSE	FALSE	FALSE
ENOG411CR1N	0	2	5	5	2.06316626569203	0.6802222002387145	2.128253805271949	0.447815653783997	1	5	1.9398685876885893	ENOG411CR1N	Xelaev18032090m.g, Xelaev18043404m.g, Xelaev18033780m.g, Xelaev18032093m.g, Xelaev18046131m.g	Xenbase_9.1	Xelaev18032090m.g, arfgef2-like.L, Xelaev18033780m.g, Xelaev18032093m.g, arfgef2-like.S	NA	Q9Y6D6, Q9Y6D5	ARFGEF1, ARFGEF2	ARFGEP1 BIG1, ARFGEP2 BIG2	ADP-ribosylation factor guanine nucleotide-exchange factor	0.026197831249706417	0.2836153876992508	FALSE	FALSE	FALSE
ENOG411CZV9	0	2	2	8	1.3048031678308571	1.4337719527834107	1.1282538052719489	1.032778154505153	1	5	1.936465038575116	ENOG411CZV9	147907379, Xelaev18023335m.g	GenBank, Xenbase_9.1	glmn.L	glomulin, FKBP associated protein [Xenopus laevis], NA	Q92990	GLMN	FAP48 FAP68 VMGLOM	Glomulin, FKBP associated protein	0.02640538524468459	0.28470967800115565	FALSE	FALSE	FALSE
ENOG411CPCE	6	8	11	26	0.5501509965721715	2.17286984652691	0.32089888321434484	1.032778154505153	7	18.5	1.9254665034676701	ENOG411CPCE	148231986, 68534328, Xelaev18020297m.g, Xelaev18000630m.g, Xelaev18034981m.g	GenBank, Xenbase_9.1	mat2a.S, mat1a.S, mat1a.L	methionine adenosyltransferase II, alpha [Xenopus laevis], M(2)21ab-prov protein [Xenopus laevis], NA	P31153, Q00266	MAT2A, MAT1A	AMS2 MATA2, AMS1 MATA1	Catalyzes the formation of S-adenosylmethionine from methionine and ATP (By similarity)	0.027085511320275868	0.2908701095197497	FALSE	FALSE	FALSE
ENOG411CW7P	11	19	23	42	1.1619059892009385	1.5479314116881286	0.5432913045507928	0.5521523135987324	15	32.5	1.916144402081588	ENOG411CW7P	109940098, 1469526, 148226601, 2231177, 28278084	GenBank	NA	RecName: Full=DNA replication licensing factor mcm7-A; AltName: Full=CDC47 homolog A; AltName: Full=CDC47p; AltName: Full=Minichromosome maintenance protein 7-A; Short=xMCM7-A; AltName: Full=p90, XMCM7 [Xenopus laevis], DNA replication licensing factor mcm7-B [Xenopus laevis], CDC47p [Xenopus laevis], Mcm7-prov protein [Xenopus laevis]	P33993	MCM7	CDC47 MCM2	minichromosome maintenance complex component 7	0.027673358940056708	0.29599424722284656	FALSE	FALSE	FALSE
ENOG411CSPY	3	7	12	15	1.8415805784241341	0.8572694095313581	1.243731022691885	0.447815653783997	5	13.5	1.9083751278885606	ENOG411CSPY	148227250, 148229886	GenBank	NA	activator of heat shock 90kDa protein ATPase homolog 1 [Xenopus laevis], AHA1, activator of heat shock 90kDa protein ATPase homolog 1 [Xenopus laevis]	O95433	AHSA1	C14orf3	AHA1, activator of heat shock 90kDa protein ATPase homolog 1 (Yeast)	0.028171374574897236	0.29938406284891245	FALSE	FALSE	FALSE
ENOG411CQFS	3	6	8	18	1.0374882177512812	1.6604244046772605	0.7132163059931051	0.8883882451699785	4.5	13	1.9077123103680034	ENOG411CQFS	1582214, 349585162, 50416330, Xelaev18047501m.g	GenBank, Xenbase_9.1	gspt1.S	polypeptide chain releasing factor eRF3, eukaryotic peptide chain release factor GTP-binding subunit ERF3A [Xenopus laevis], Gspt2-prov protein [Xenopus laevis], NA	Q8IYD1, P15170	GSPT2, GSPT1	ERF3B, ERF3A	G1 to S phase transition	0.02821420487581374	0.29938406284891245	FALSE	FALSE	FALSE
ENOG411D04M	0	3	2	10	1.3048031678308571	1.3807234109856308	1.1282538052719489	0.9072472724212941	1.5	6	1.8989540549378479	ENOG411D04M	147902441, 148233376, Xelaev18010694m.g	GenBank, Xenbase_9.1	rfc5.S	MGC80325 protein [Xenopus laevis], replication factor C (activator 1) 5, 36.5kDa [Xenopus laevis], NA	P40937	RFC5	NA	replication factor C (activator 1) 5, 36.5kDa	0.028785258580712052	0.3030385096252915	FALSE	FALSE	FALSE
ENOG411CRSH	0	3	2	10	1.3048031678308571	1.3807234109856308	1.1282538052719489	0.9072472724212941	1.5	6	1.8989540549378479	ENOG411CRSH	147906292	GenBank	NA	protein phosphatase 6, catalytic subunit [Xenopus laevis]	O00743	PPP6C	PPP6	protein phosphatase 6, catalytic subunit	0.028785258580712052	0.3030385096252915	FALSE	FALSE	FALSE
ENOG411D0GZ	13	24	30	46	1.6179536255981837	1.0567461616053972	0.6901326928800638	0.35854831568690954	18.5	38	1.8912983571698676	ENOG411D0GZ	148223685, Xelaev18029939m.g, Xelaev18027896m.g	GenBank, Xenbase_9.1	copb2.S, copb2.L	coatomer protein complex, subunit beta 2 (beta prime) [Xenopus laevis], NA	P35606	COPB2	NA	coatomer protein complex, subunit beta 2 (beta prime)	0.029292263944412852	0.307166720734745	FALSE	FALSE	FALSE
ENOG411DFA5	1	3	3	13	0.7272110266705417	1.9281909727377486	0.5432913045507926	1.2551705758416012	2	8	1.8776527605579185	ENOG411DFA5	Xelaev18044348m.g, Xelaev18046916m.g	Xenbase_9.1	snx4.L, snx4.S	NA	NA	NA	NA	Sorting nexin 4	0.030214341512473316	0.31269547789126273	FALSE	FALSE	FALSE
ENOG411CV48	14	18	24	45	0.6092825935084717	2.041586012235912	0.28025689871699905	0.7234500963974243	16	34.5	1.874447167156382	ENOG411CV48	148235905, 27882650, 62122653, 62122655, Xelaev18040907m.g, Xelaev18042999m.g	GenBank, Xenbase_9.1	psmd4.L, psmd4.S	proteasome (prosome, macropain) 26S subunit, non-ATPase, 4 [Xenopus laevis], Xrpn10c protein [Xenopus laevis], 26S proteasome subunit [Xenopus laevis], NA	P55036	PSMD4	MCB1	Proteasome (Prosome, macropain) 26S subunit, non-ATPase, 4	0.03043440879142717	0.31269547789126273	FALSE	FALSE	FALSE
ENOG411CR3D	8	16	20	33	1.5019441477325213	1.1457932884281858	0.7656837258872408	0.447815653783997	12	26.5	1.8722330959107192	ENOG411CR3D	147903655, 148224152, 55154507, Xelaev18010244m.g	GenBank, Xenbase_9.1	prmt5.S	protein arginine methyltransferase 5 [Xenopus laevis], methyltransferase Hsl7 [Xenopus laevis], LOC495515 protein [Xenopus laevis], NA	O14744	PRMT5	HRMT1L5 IBP72 JBP1 SKB1	protein arginine methyltransferase 5	0.03058718110211096	0.31269547789126273	FALSE	FALSE	FALSE
ENOG411CTFH	10	17	19	41	0.8164199732701317	1.8298952061125935	0.40578778080085787	0.6702080751204449	13.5	30	1.8712274084984197	ENOG411CTFH	147898905, 147905173, Xelaev18013438m.g, Xelaev18013439m.g, Xelaev18015931m.g	GenBank, Xenbase_9.1	mars.L, Xetrov90006328m.L, Xetrov90006328m.S	methionyl-tRNA synthetase [Xenopus laevis], methionyl-tRNA synthetase, cytoplasmic [Xenopus laevis], NA	P56192	MARS	NA	methionyl-tRNA synthetase	0.030656783643633237	0.31269547789126273	FALSE	FALSE	FALSE
ENOG411CXH3	1	1	5	5	1.3471557549751167	1.297537405746528	1.1282538052719489	1.032778154505153	1	5	1.870080468103959	ENOG411CXH3	147898578, Xelaev18030321m.g	GenBank, Xenbase_9.1	nrbp1.S	nuclear receptor binding protein 1 [Xenopus laevis], NA	Q9UHY1	NRBP1	BCON3 NRBP	nuclear receptor binding protein 1	0.030736322182884867	0.31269547789126273	FALSE	FALSE	FALSE
ENOG411CS5G	1	7	11	11	2.550954097169398	0.08837160895771831	2.128253805271949	0.032778154505153104	4	11	1.8662851045624567	ENOG411CS5G	148237910, 159155457, 48735421, 50418211, 72679403, Xelaev18035545m.g, Xelaev18037448m.g	GenBank, Xenbase_9.1	zw10.L, zw10.S	ZW10, kinetochore associated, homolog [Xenopus laevis], Zw10 protein [Xenopus laevis], LOC445850 protein [Xenopus laevis], NA	Q96RU2, O43264	USP28, ZW10	KIAA1515, NA	ZW10, kinetochore associated, homolog (Drosophila)	0.03100074383070262	0.31269547789126273	FALSE	FALSE	FALSE
ENOG411CY44	1	0	5	2	1.3471557549751167	1.2888515295454006	1.1282538052719489	1.032778154505153	0.5	3.5	1.863938626141595	ENOG411CY44	148227080, Xelaev18044070m.g	GenBank, Xenbase_9.1	galk1.L	galactokinase 1 [Xenopus laevis], NA	P51570	GALK1	GALK	galactokinase 1	0.03116516180990347	0.31269547789126273	FALSE	FALSE	FALSE
ENOG411CT1X	2	4	7	12	1.277263054586856	1.3556436331960844	0.9583288038296363	0.8263272770377267	3	9.5	1.861746173162729	ENOG411CT1X	147898562, 148226640, Xelaev18043691m.g	GenBank, Xenbase_9.1	nploc4.L	nuclear protein localization 4 homolog [Xenopus laevis], uncharacterized protein LOC494816 [Xenopus laevis], NA	Q8TAT6	NPLOC4	KIAA1499 NPL4	Nuclear protein localization 4 homolog (S. cerevisiae)	0.031319438447081474	0.31269547789126273	FALSE	FALSE	FALSE
ENOG411CRUA	3	4	4	21	-0.09451261085055432	2.7253369939097514	-0.1347806005618449	1.5853191775339317	3.5	12.5	1.8602737613720732	ENOG411CRUA	148237364, Xelaev18023166m.g, Xelaev18010054m.g, Xelaev18025267m.g	GenBank, Xenbase_9.1	ttc39a.L, ttc39b.S, ttc39a.S	tetratricopeptide repeat protein 39B [Xenopus laevis], NA	Q5SRH9, Q5VTQ0	TTC39A, TTC39B	C1orf34 KIAA0452, C9orf52	tetratricopeptide repeat domain	0.031423401923527036	0.31269547789126273	FALSE	FALSE	FALSE
ENOG411CZ1T	0	1	2	5	1.3048031678308571	1.297537405746528	1.1282538052719489	1.032778154505153	0.5	3.5	1.8401326665334587	ENOG411CZ1T	147906013	GenBank	NA	mitochondrial ribosomal protein S34 [Xenopus laevis]	P82930	MRPS34	NA	mitochondrial ribosomal protein S34	0.032874381220369016	0.31269547789126273	FALSE	FALSE	FALSE
ENOG411CTTR	0	1	2	5	1.3048031678308571	1.297537405746528	1.1282538052719489	1.032778154505153	0.5	3.5	1.8401326665334587	ENOG411CTTR	116487686, 168693453	GenBank	NA	LOC100049719 protein [Xenopus laevis], glutamate-cysteine ligase, catalytic subunit [Xenopus laevis]	P48506	GCLC	GLCL GLCLC	glutamate--cysteine ligase catalytic subunit	0.032874381220369016	0.31269547789126273	FALSE	FALSE	FALSE
ENOG411CX0T	0	0	2	2	1.3048031678308571	1.2888515295454006	1.1282538052719489	1.032778154505153	0	2	1.8339908245710947	ENOG411CX0T	147901478	GenBank	NA	60S ribosomal export protein NMD3 [Xenopus laevis]	Q96D46	NMD3	NA	NMD3 homolog (S. cerevisiae)	0.03332767808489524	0.31269547789126273	FALSE	FALSE	FALSE
ENOG411CWZF	0	0	2	2	1.3048031678308571	1.2888515295454006	1.1282538052719489	1.032778154505153	0	2	1.8339908245710947	ENOG411CWZF	Xelaev18009744m.g	Xenbase_9.1	gak.S	NA	O14976	GAK	NA	cyclin G associated kinase	0.03332767808489524	0.31269547789126273	FALSE	FALSE	FALSE
ENOG411CQBP	0	0	2	2	1.3048031678308571	1.2888515295454006	1.1282538052719489	1.032778154505153	0	2	1.8339908245710947	ENOG411CQBP	148227107, 148229925, 284520891, Xelaev18020978m.g, Xelaev18041788m.g, Xelaev18025974m.g, Xelaev18017768m.g, Xelaev18024063m.g	GenBank, Xenbase_9.1	srpk3.S, srpk2.S, loc100144966.S, srpk3.L, loc100144966.L	SRSF protein kinase 1 [Xenopus laevis], serine/threonine-protein kinase SRPK1-like [Xenopus laevis], SRSF protein kinase 3 [Xenopus laevis], NA	P78362, Q96SB4, Q9UPE1	SRPK2, SRPK1, SRPK3	NA, MSSK1 STK23	SRSF protein kinase	0.03332767808489524	0.31269547789126273	FALSE	FALSE	FALSE
ENOG411CSIC	0	0	2	2	1.3048031678308571	1.2888515295454006	1.1282538052719489	1.032778154505153	0	2	1.8339908245710947	ENOG411CSIC	147906538, 50415131, Xelaev18006916m.g	GenBank, Xenbase_9.1	vps13a.L	vacuolar protein sorting 13 homolog A [Xenopus laevis], LOC445856 protein [Xenopus laevis], NA	Q96RL7	VPS13A	CHAC KIAA0986	vacuolar protein sorting 13 homolog A (S. cerevisiae)	0.03332767808489524	0.31269547789126273	FALSE	FALSE	FALSE
ENOG411CTIR	0	0	2	2	1.3048031678308571	1.2888515295454006	1.1282538052719489	1.032778154505153	0	2	1.8339908245710947	ENOG411CTIR	147901980, Xelaev18037422m.g	GenBank, Xenbase_9.1	tbcel.S	tubulin folding cofactor E-like [Xenopus laevis], NA	Q5QJ74, A0A2R8YFB7	TBCEL, NA	LRRC35, NA	Tubulin folding cofactor E-like	0.03332767808489524	0.31269547789126273	FALSE	FALSE	FALSE
ENOG411CSJ2	0	0	2	2	1.3048031678308571	1.2888515295454006	1.1282538052719489	1.032778154505153	0	2	1.8339908245710947	ENOG411CSJ2	116487835, 120577674, 148226096, Xelaev18029827m.g, Xelaev18027736m.g, Xelaev18019556m.g, Xelaev18027735m.g, Xelaev18029826m.g, Xelaev18019555m.g, Xelaev18019553m.g, Xelaev18001039m.g, Xelaev18001041m.g, Xelaev18019554m.g	GenBank, Xenbase_9.1	plscr1.S, plscr1.L, plscr3.L, plscr2.L, plscr2.S, Xelaev18019555m.g, loc100488434.L, loc100488434.S, plscr3.S, loc100489081.L	Plscr2 protein [Xenopus laevis], LOC100037052 protein [Xenopus laevis], phospholipid scramblase 1 [Xenopus laevis], NA	O15162, Q9NRY7, Q9NRY6	PLSCR1, PLSCR2, PLSCR3	NA	Phospholipid scramblase	0.03332767808489524	0.31269547789126273	FALSE	FALSE	FALSE
ENOG411CTYY	0	0	2	2	1.3048031678308571	1.2888515295454006	1.1282538052719489	1.032778154505153	0	2	1.8339908245710947	ENOG411CTYY	148227384, Xelaev18005182m.g	GenBank, Xenbase_9.1	anapc4.L	anaphase promoting complex subunit 4 [Xenopus laevis], NA	Q9UJX5	ANAPC4	APC4	anaphase promoting complex subunit 4	0.03332767808489524	0.31269547789126273	FALSE	FALSE	FALSE
ENOG411CSJV	0	0	2	2	1.3048031678308571	1.2888515295454006	1.1282538052719489	1.032778154505153	0	2	1.8339908245710947	ENOG411CSJV	148225724, 148229218, Xelaev18037901m.g, Xelaev18022051m.g, Xelaev18024317m.g, Xelaev18017954m.g	GenBank, Xenbase_9.1	cpt1a.S, loc100490391-like.L, loc100490391-like.S, cpt1b.L	carnitine palmitoyltransferase 1A (liver) [Xenopus laevis], carnitine palmitoyltransferase 1B (muscle) [Xenopus laevis], NA	P50416, Q92523, Q8TCG5	CPT1A, CPT1B, CPT1C	CPT1, KIAA1670, CATL1	Carnitine palmitoyltransferase	0.03332767808489524	0.31269547789126273	FALSE	FALSE	FALSE
ENOG411D4WM	0	0	2	2	1.3048031678308571	1.2888515295454006	1.1282538052719489	1.032778154505153	0	2	1.8339908245710947	ENOG411D4WM	351721171, 51593229, Xelaev18047438m.g, Xelaev18046414m.g, Xelaev18045063m.g	GenBank, Xenbase_9.1	atp5j2.S, c17orf80-like.S, atp5j2.L	ATP synthase, H+ transporting, mitochondrial Fo complex, subunit F2 [Xenopus laevis], MGC85584 protein [Xenopus laevis], NA	NA	NA	NA	ATP synthase, H transporting, mitochondrial Fo complex, subunit F2	0.03332767808489524	0.31269547789126273	FALSE	FALSE	FALSE
ENOG411CZ7R	0	0	2	2	1.3048031678308571	1.2888515295454006	1.1282538052719489	1.032778154505153	0	2	1.8339908245710947	ENOG411CZ7R	12229611, 12229617, 147898695, Xelaev18036845m.g, Xelaev18021331m.g, Xelaev18017349m.g, Xelaev18005017m.g, Xelaev18034551m.g	GenBank, Xenbase_9.1	ctbp2-like.2.S, ctbp2-like.1.S, ctbp2-like.1.L, ctbp1.L, ctbp2-like.2.L	RecName: Full=C-terminal-binding protein 2; Short=CtBP2; AltName: Full=C-terminal-binding protein B; AltName: Full=TCF-3 corepressor CtBP; AltName: Full=XCtBP, RecName: Full=C-terminal-binding protein 1; Short=CtBP1; AltName: Full=C-terminal-binding protein A, uncharacterized protein LOC494997 [Xenopus laevis], NA	P56545, Q13363	CTBP2, CTBP1	NA, CTBP	C-terminal binding protein	0.03332767808489524	0.31269547789126273	FALSE	FALSE	FALSE
ENOG411CXQT	0	0	2	2	1.3048031678308571	1.2888515295454006	1.1282538052719489	1.032778154505153	0	2	1.8339908245710947	ENOG411CXQT	148238249, Xelaev18005008m.g	GenBank, Xenbase_9.1	polr1a.L	polymerase (RNA) I polypeptide A, 194kDa [Xenopus laevis], NA	O95602	POLR1A	NA	polymerase (RNA) I polypeptide A	0.03332767808489524	0.31269547789126273	FALSE	FALSE	FALSE
ENOG411CQBD	0	0	2	2	1.3048031678308571	1.2888515295454006	1.1282538052719489	1.032778154505153	0	2	1.8339908245710947	ENOG411CQBD	147904780	GenBank	NA	CWF19-like protein 1 [Xenopus laevis]	Q69YN2	CWF19L1	NA	CWF19-like 1, cell cycle control (S. pombe)	0.03332767808489524	0.31269547789126273	FALSE	FALSE	FALSE
ENOG411CVPU	0	0	2	2	1.3048031678308571	1.2888515295454006	1.1282538052719489	1.032778154505153	0	2	1.8339908245710947	ENOG411CVPU	148234538, Xelaev18032482m.g	GenBank, Xenbase_9.1	gpaa1.L	glycosylphosphatidylinositol anchor attachment protein 1 homolog [Xenopus laevis], NA	O43292	GPAA1	GAA1	glycosylphosphatidylinositol anchor attachment protein 1 homolog (yeast)	0.03332767808489524	0.31269547789126273	FALSE	FALSE	FALSE
ENOG411DFG2	0	0	2	2	1.3048031678308571	1.2888515295454006	1.1282538052719489	1.032778154505153	0	2	1.8339908245710947	ENOG411DFG2	Xelaev18033776m.g, Xelaev18032083m.g	Xenbase_9.1	vcpip1.S, vcpip1.L	NA	NA	NA	NA	Valosin containing protein (P97) p47 complex interacting protein 1	0.03332767808489524	0.31269547789126273	FALSE	FALSE	FALSE
ENOG411CSS2	0	0	2	2	1.3048031678308571	1.2888515295454006	1.1282538052719489	1.032778154505153	0	2	1.8339908245710947	ENOG411CSS2	148232916, Xelaev18016053m.g, Xelaev18013590m.g	GenBank, Xenbase_9.1	sp1.S, sp1.L	Sp1 transcription factor [Xenopus laevis], NA	P08047	SP1	TSFP1	sp1 transcription factor	0.03332767808489524	0.31269547789126273	FALSE	FALSE	FALSE
ENOG411CYBM	0	0	2	2	1.3048031678308571	1.2888515295454006	1.1282538052719489	1.032778154505153	0	2	1.8339908245710947	ENOG411CYBM	120577563, 189441702, Xelaev18044710m.g	GenBank, Xenbase_9.1	sp3.L	LOC100037013 protein [Xenopus laevis], NA	Q02447	SP3	NA	Sp3 transcription factor	0.03332767808489524	0.31269547789126273	FALSE	FALSE	FALSE
ENOG411CPPU	0	0	2	2	1.3048031678308571	1.2888515295454006	1.1282538052719489	1.032778154505153	0	2	1.8339908245710947	ENOG411CPPU	Xelaev18039880m.g	Xenbase_9.1	stard9.L	NA	Q9P2P6	STARD9	KIAA1300	StAR-related lipid transfer (START) domain containing 9	0.03332767808489524	0.31269547789126273	FALSE	FALSE	FALSE
ENOG411D050	0	0	2	2	1.3048031678308571	1.2888515295454006	1.1282538052719489	1.032778154505153	0	2	1.8339908245710947	ENOG411D050	114150033, 114150034, 148222468, 148227405, Xelaev18027787m.g	GenBank, Xenbase_9.1	mogat1.L	RecName: Full=2-acylglycerol O-acyltransferase 2-A; AltName: Full=Acyl-CoA:monoacylglycerol acyltransferase 2-A; Short=MGAT2-A; AltName: Full=Monoacylglycerol O-acyltransferase 2-A, RecName: Full=2-acylglycerol O-acyltransferase 1; AltName: Full=Acyl-CoA:monoacylglycerol acyltransferase 1; Short=MGAT1; AltName: Full=Monoacylglycerol O-acyltransferase 1, 2-acylglycerol O-acyltransferase 1 [Xenopus…	Q3SYC2, Q96PD6	MOGAT2, MOGAT1	DC5 DGAT2L5, DC2 DGAT2L1	Monoacylglycerol O-acyltransferase	0.03332767808489524	0.31269547789126273	FALSE	FALSE	FALSE
ENOG411CUAU	0	0	2	2	1.3048031678308571	1.2888515295454006	1.1282538052719489	1.032778154505153	0	2	1.8339908245710947	ENOG411CUAU	62825970, Xelaev18015777m.g, Xelaev18013267m.g	GenBank, Xenbase_9.1	cog3.S, cog3.L	LOC779031 protein [Xenopus laevis], NA	Q96JB2	COG3	SEC34	Component of oligomeric Golgi complex 3	0.03332767808489524	0.31269547789126273	FALSE	FALSE	FALSE
ENOG411CSY9	12	19	21	46	0.6292342576626707	1.95198303291973	0.30228320504699774	0.6804764105742719	15.5	33.5	1.8251962498867826	ENOG411CSY9	147905097, 51703709, Xelaev18005678m.g, Xelaev18037141m.g, Xelaev18034885m.g, Xelaev18009370m.g	GenBank, Xenbase_9.1	sec24d-like.1.L, sec24d-like.2.S, sec24d-like.2.L, sec24d-like.1.S	SEC24 family, member D [Xenopus laevis], LOC446945 protein [Xenopus laevis], NA	P53992, O94855	SEC24C, SEC24D	KIAA0079, KIAA0755	SEC24 family, member	0.0339857097630062	0.31723018917292745	FALSE	FALSE	FALSE
ENOG411CZJS	0	0	0	8	0	2.5778274065961155	0	2.617740655226309	0	4	1.8227992399326447	ENOG411CZJS	Xelaev18012356m.g	Xenbase_9.1	ddx20.L	NA	Q9UHI6	DDX20	DP103 GEMIN3	DEAD (Asp-Glu-Ala-Asp) box polypeptide 20	0.03416690145168404	0.31723018917292745	FALSE	FALSE	FALSE
ENOG411CYAB	0	0	0	8	0	2.5778274065961155	0	2.617740655226309	0	4	1.8227992399326447	ENOG411CYAB	Xelaev18025787m.g, Xelaev18023845m.g	Xenbase_9.1	vprbp.S, vprbp.L	NA	Q9Y4B6	DCAF1	KIAA0800 RIP VPRBP	Vpr (HIV-1) binding protein	0.03416690145168404	0.31723018917292745	FALSE	FALSE	FALSE
ENOG411CP4W	0	3	4	7	1.8453247825788208	0.7095854272972324	1.8652193994381552	0.447815653783997	1.5	5.5	1.8065943347261022	ENOG411CP4W	Xelaev18021204m.g, Xelaev18017511m.g	Xenbase_9.1	xpot.S, xpot.L	NA	O43592	XPOT	NA	exportin, tRNA	0.03541277674375186	0.32665262093410835	FALSE	FALSE	FALSE
ENOG411CYT4	1	2	5	7	1.3471557549751167	1.2075138712135043	1.1282538052719489	0.8628531530628408	1.5	6	1.8064242163692763	ENOG411CYT4	148232198	GenBank	NA	polymerase (RNA) III (DNA directed) polypeptide E (80kD) [Xenopus laevis]	Q9NVU0	POLR3E	KIAA1452	Polymerase (RNA) III (DNA directed) polypeptide E	0.03542605088664601	0.32665262093410835	FALSE	FALSE	FALSE
ENOG411CS1K	3	8	8	21	1.0374882177512812	1.5062904492451246	0.7132163059931051	0.7373222709789817	5.5	14.5	1.798723145270835	ENOG411CS1K	Xelaev18005634m.g, Xelaev18016955m.g, Xelaev18009334m.g, Xelaev18020080m.g	Xenbase_9.1	sec24b.L, sec24a.L, sec24b.S, sec24a.S	NA	O95487, O95486	SEC24B, SEC24A	NA	SEC24 family, member	0.03603124290260274	0.3310912148507207	FALSE	FALSE	FALSE
ENOG411CS3S	1	0	2	6	0.3070070547330004	2.232428122919567	0.12825380527194893	2.255170575841601	0.5	4	1.7956518345017953	ENOG411CS3S	148228726, Xelaev18045547m.g	GenBank, Xenbase_9.1	chtf18.L	chromosome transmission fidelity protein 18 homolog [Xenopus laevis], NA	Q8WVB6	CHTF18	C16orf41 CTF18	CTF18, chromosome transmission fidelity factor 18 homolog (S. cerevisiae)	0.03627495329803137	0.33218912711964343	FALSE	FALSE	FALSE
ENOG411CZDC	29	42	44	92	0.29334132360534126	2.243648380224942	0.12825380527194893	0.5607097101899303	35.5	68	1.793922623378844	ENOG411CZDC	108935850, 147898891, 1753193, Xelaev18025893m.g	GenBank, Xenbase_9.1	mcm2.S	RecName: Full=DNA replication licensing factor mcm2; AltName: Full=BM28-homolog; AltName: Full=Minichromosome maintenance protein 2; Short=xMCM2; AltName: Full=p112, DNA replication licensing factor mcm2 [Xenopus laevis], xMCM2 [Xenopus laevis], NA	P49736	MCM2	BM28 CCNL1 CDCL1 KIAA0030	Minichromosome maintenance complex component 2	0.03641275996379616	0.3323130380313683	FALSE	FALSE	FALSE
ENOG411CQHM	1	1	1	13	-0.2764018151375699	2.798240631791072	-0.45670869544920745	2.255170575841601	1	7	1.78320932831515	ENOG411CQHM	147905979, Xelaev18017584m.g	GenBank, Xenbase_9.1	rpap3.L	RNA polymerase II-associated protein 3 [Xenopus laevis], NA	Q9H6T3	RPAP3	NA	RNA polymerase II associated protein 3	0.03727611727243679	0.3330131288162816	FALSE	FALSE	FALSE
ENOG411CVXR	4	10	8	28	0.6140956512431687	1.9037650795057497	0.3912882111057427	0.8463650302742718	7	18	1.780396396795876	ENOG411CVXR	147901418, 47122884, Xelaev18011729m.g, Xelaev18014137m.g	GenBank, Xenbase_9.1	rpa1.L, rpa1.S	replication protein A 70 kDa DNA-binding subunit [Xenopus laevis], LOC397937 protein [Xenopus laevis], NA	P27694	RPA1	REPA1 RPA70	Replication protein A1, 70kDa	0.037505555521751104	0.3330131288162816	FALSE	FALSE	FALSE
ENOG411CVWQ	0	2	2	7	1.3048031678308571	1.2075138712135043	1.1282538052719489	0.8628531530628408	1	4.5	1.7764764147987762	ENOG411CVWQ	116487821, 11878269, 150416158, 161612099, 350994444, 350994446, 47125185, 63409950, Xelaev18007548m.g, Xelaev18047841m.g, Xelaev18045620m.g	GenBank, Xenbase_9.1	pxn.L, tgfb1i1.S, tgfb1i1.L	Tgfb1i1 protein [Xenopus laevis], paxillin [Xenopus laevis], RecName: Full=Transforming growth factor beta-1-induced transcript 1 protein; AltName: Full=Androgen receptor activator of 55 kDa; AltName: Full=Hydrogen peroxide-inducible clone 5 protein; Short=Hic-5, Hic-5 [Xenopus laevis], transforming growth factor beta-1-induced transcript 1 protein [Xenopus laevis], LOC397826 protein [Xenopus lae…	O43294, O60711, P49023	TGFB1I1, LPXN, PXN	ARA55, LDLP, NA	transforming growth factor beta 1 induced transcript 1	0.03782721297420433	0.3330131288162816	FALSE	FALSE	FALSE
ENOG411DES1	0	0	3	1	1.5980745634395823	0.911348329855701	1.5432913045507926	0.447815653783997	0	2	1.7744299447138607	ENOG411DES1	147900093, 147905558, Xelaev18010349m.g, Xelaev18007411m.g, Xelaev18010355m.g	GenBank, Xenbase_9.1	Xelaev18010349m.g, Xelaev18007411m.g, Xelaev18010355m.g	myotubularin-related protein 3 [Xenopus laevis], myotubularin related protein 3 [Xenopus laevis], NA	NA	NA	NA	Myotubularin related protein 3	0.03799603018282232	0.3330131288162816	FALSE	FALSE	FALSE
ENOG411CU2K	12	19	24	41	1.064021769260429	1.4430545678789362	0.48670777618442546	0.5182049816753946	15.5	32.5	1.7727706789435758	ENOG411CU2K	Xelaev18016912m.g	Xenbase_9.1	gemin5.L	NA	Q8TEQ6	GEMIN5	NA	gem (nuclear organelle) associated protein 5	0.03813335693744785	0.3330131288162816	FALSE	FALSE	FALSE
ENOG411CXXZ	0	0	1	3	0.9226215573892205	1.5785269911948188	0.5432913045507926	1.447815653783997	0	2	1.768579099458665	ENOG411CXXZ	148233628, 162287235, Xelaev18005468m.g, Xelaev18009212m.g	GenBank, Xenbase_9.1	plrg1.L, plrg1.S	pleiotropic regulator 1 [Xenopus laevis], uncharacterized protein LOC495006 [Xenopus laevis], NA	O43660	PLRG1	NA	Pleiotropic regulator 1	0.038482070607416236	0.3330131288162816	FALSE	FALSE	FALSE
ENOG411CPZH	0	0	1	3	0.9226215573892205	1.5785269911948188	0.5432913045507926	1.447815653783997	0	2	1.768579099458665	ENOG411CPZH	148224862, Xelaev18006124m.g, Xelaev18009677m.g	GenBank, Xenbase_9.1	kcmf1.L, kcmf1.S	E3 ubiquitin-protein ligase KCMF1 [Xenopus laevis], NA	Q9P0J7	KCMF1	FIGC ZZZ1	potassium channel modulatory factor 1	0.038482070607416236	0.3330131288162816	FALSE	FALSE	FALSE
ENOG411CXP0	0	0	1	3	0.9226215573892205	1.5785269911948188	0.5432913045507926	1.447815653783997	0	2	1.768579099458665	ENOG411CXP0	148231899	GenBank	NA	pre-mRNA-splicing factor RBM22 [Xenopus laevis]	Q9NW64	RBM22	ZC3H16	RNA binding motif protein 22	0.038482070607416236	0.3330131288162816	FALSE	FALSE	FALSE
ENOG411CXSD	0	0	1	3	0.9226215573892205	1.5785269911948188	0.5432913045507926	1.447815653783997	0	2	1.768579099458665	ENOG411CXSD	122936460, Xelaev18022476m.g	GenBank, Xenbase_9.1	slc7a6os.L	LOC100037092 protein [Xenopus laevis], NA	Q96CW6	SLC7A6OS	NA	solute carrier family 7, member 6 opposite strand	0.038482070607416236	0.3330131288162816	FALSE	FALSE	FALSE
ENOG411CWXV	0	0	1	3	0.9226215573892205	1.5785269911948188	0.5432913045507926	1.447815653783997	0	2	1.768579099458665	ENOG411CWXV	148225460, 189441694, 27469849, 78101115, 83405093, Xelaev18021366m.g, Xelaev18017314m.g	GenBank, Xenbase_9.1	znf346.S, znf346.L	zinc finger protein 346 [Xenopus laevis], Jaz protein [Xenopus laevis], Chain A, Solution Structure Of The N-Terminal Zinc Fingers Of The Xenopus Laevis Double Stranded Rna Binding Protein Zfa, NA	Q9UL40	ZNF346	JAZ	Zinc finger protein 346	0.038482070607416236	0.3330131288162816	FALSE	FALSE	FALSE
ENOG411D0DW	0	0	1	3	0.9226215573892205	1.5785269911948188	0.5432913045507926	1.447815653783997	0	2	1.768579099458665	ENOG411D0DW	123899857, 71051894, Xelaev18005350m.g	GenBank, Xenbase_9.1	ufsp2.L	RecName: Full=Ufm1-specific protease 2; Short=UfSP2, MGC130612 protein [Xenopus laevis], NA	Q9NUQ7	UFSP2	C4orf20	ufm1-specific peptidase 2	0.038482070607416236	0.3330131288162816	FALSE	FALSE	FALSE
ENOG411D009	0	0	1	3	0.9226215573892205	1.5785269911948188	0.5432913045507926	1.447815653783997	0	2	1.768579099458665	ENOG411D009	1177822, 148238191, Xelaev18047345m.g	GenBank, Xenbase_9.1	orc2.S	XORC2 [Xenopus laevis], origin recognition complex subunit 2 [Xenopus laevis], NA	Q13416	ORC2	ORC2L	Origin recognition complex, subunit 2	0.038482070607416236	0.3330131288162816	FALSE	FALSE	FALSE
ENOG411CQX9	0	0	1	3	0.9226215573892205	1.5785269911948188	0.5432913045507926	1.447815653783997	0	2	1.768579099458665	ENOG411CQX9	Xelaev18012639m.g, Xelaev18030108m.g, Xelaev18028091m.g	Xenbase_9.1	loc100495335.L, nt5c1a.S, nt5c1a.L	NA	Q9BXI3, Q96P26	NT5C1A, NT5C1B	NA, AIRP	5'-nucleotidase, cytosolic	0.038482070607416236	0.3330131288162816	FALSE	FALSE	FALSE
ENOG411CU4S	0	0	1	3	0.9226215573892205	1.5785269911948188	0.5432913045507926	1.447815653783997	0	2	1.768579099458665	ENOG411CU4S	148227234, 148229828, Xelaev18043214m.g, Xelaev18045976m.g	GenBank, Xenbase_9.1	cdk5rap3.L, cdk5rap3.S	CDK5 regulatory subunit associated protein 3 [Xenopus laevis], uncharacterized protein LOC734249 [Xenopus laevis], NA	Q96JB5	CDK5RAP3	IC53 LZAP	CDK5 regulatory subunit associated protein 3	0.038482070607416236	0.3330131288162816	FALSE	FALSE	FALSE
ENOG411CRXS	0	0	1	3	0.9226215573892205	1.5785269911948188	0.5432913045507926	1.447815653783997	0	2	1.768579099458665	ENOG411CRXS	148234743, Xelaev18043872m.g	GenBank, Xenbase_9.1	ctsa.L	cathepsin A precursor [Xenopus laevis], NA	P10619	CTSA	PPGB	cathepsin A	0.038482070607416236	0.3330131288162816	FALSE	FALSE	FALSE
ENOG411CU7V	0	0	1	3	0.9226215573892205	1.5785269911948188	0.5432913045507926	1.447815653783997	0	2	1.768579099458665	ENOG411CU7V	Xelaev18007718m.g, Xelaev18010560m.g	Xenbase_9.1	golga3.L, golga3.S	NA	Q08378	GOLGA3	NA	Golgin A3	0.038482070607416236	0.3330131288162816	FALSE	FALSE	FALSE
ENOG411CW3H	2	11	8	23	1.5035333043874688	0.9944065582363247	1.1282538052719489	0.447815653783997	6.5	15.5	1.766310215857477	ENOG411CW3H	148227244, Xelaev18037088m.g	GenBank, Xenbase_9.1	dna2.S	DNA2-like helicase [Xenopus laevis], NA	P51530	DNA2	DNA2L KIAA0083	DNA replication helicase 2 homolog (yeast)	0.03867190931368652	0.33357640485418627	FALSE	FALSE	FALSE
ENOG411CRY3	4	2	10	8	1.06181544693331	1.4337719527834107	0.6807948283007275	1.032778154505153	3	9	1.7646467733833961	ENOG411CRY3	160420251, Xelaev18027821m.g	GenBank, Xenbase_9.1	hdlbp.L	high density lipoprotein binding protein (vigilin) [Xenopus laevis], NA	Q00341	HDLBP	HBP VGL	High density lipoprotein binding protein	0.03881157464454967	0.333704664307157	FALSE	FALSE	FALSE
ENOG411DFH2	12	16	22	38	0.7782262824060063	1.7118613028309462	0.3664135424667134	0.645755031395906	14	30	1.7607578172694842	ENOG411DFH2	147904138, 218749891, 28302346, 54311369, Xelaev18028958m.g, Xelaev18038829m.g, Xelaev18026704m.g	GenBank, Xenbase_9.1	Xelaev18028958m.g, Xelaev18038829m.g, Xelaev18026704m.g	heterogeneous nuclear ribonucleoprotein U (scaffold attachment factor A) [Xenopus laevis], heterogeneous nuclear ribonucleoprotein U [Xenopus laevis], Hnrnpu protein [Xenopus laevis], Saf-A protein [Xenopus laevis], NA	NA	NA	NA	Heterogeneous nuclear ribonucleoprotein U (Scaffold attachment factor A)	0.03913970112758887	0.33519180489662637	FALSE	FALSE	FALSE
ENOG411CZRP	0	6	5	11	2.06316626569203	0.4253270047213344	2.128253805271949	0.22542323244754905	3	8	1.7596304664463787	ENOG411CZRP	Xelaev18006732m.g	Xenbase_9.1	focad.L	NA	Q5VW36	FOCAD	KIAA1797	focadhesin	0.039235241186478705	0.33519180489662637	FALSE	FALSE	FALSE
ENOG411CX3C	2	0	4	5	0.43419275757670456	2.0379023504666143	0.2802568987169987	2.032778154505153	1	4.5	1.7480352146355214	ENOG411CX3C	147904080, Xelaev18006663m.g	GenBank, Xenbase_9.1	cope.L	coatomer protein complex, subunit epsilon [Xenopus laevis], NA	O14579	COPE	NA	Coatomer protein complex, subunit epsilon	0.04022896493253586	0.3425867905401302	FALSE	FALSE	FALSE
ENOG411CPMV	0	4	2	11	1.3048031678308571	1.164755850329719	1.1282538052719489	0.7108500596177907	2	6.5	1.7462419282817359	ENOG411CPMV	161611758, Xelaev18029655m.g, Xelaev18027517m.g, Xelaev18029657m.g, Xelaev18027518m.g	GenBank, Xenbase_9.1	bdh1.S, bdh1.L, loc100497276-like.S, loc100497276-like.L	LOC100127326 protein [Xenopus laevis], NA	Q02338	BDH1	BDH SDR9C1	3-hydroxybutyrate dehydrogenase, type 1	0.0403844609803407	0.34281920209978106	FALSE	FALSE	FALSE
ENOG411CY7I	13	29	31	51	1.7386644910894256	0.7272270811088797	0.7359363824931886	0.2413647763165707	21	41	1.7436486523721786	ENOG411CY7I	147898507, 147900293, Xelaev18009125m.g, Xelaev18005359m.g	GenBank, Xenbase_9.1	acsl1.S, acsl1.L	acyl-CoA synthetase long-chain family member 1 protein [Xenopus laevis], similar to fatty acid Coenzyme A ligase [Xenopus laevis], NA	P33121	ACSL1	FACL1 FACL2 LACS LACS1 LACS2	Acyl-CoA synthetase long-chain family member 1	0.04061018705205974	0.3436444309405308	FALSE	FALSE	FALSE
ENOG411DFH6	2	3	3	16	0.06299406474440446	2.3967957965056286	-0.041671196170363696	1.5352784950343363	2.5	9.5	1.7393340911838149	ENOG411DFH6	163915958, Xelaev18022194m.g, Xelaev18024240m.g	GenBank, Xenbase_9.1	hnrnpul2.L, hnrnpul2.S	LOC100137638 protein [Xenopus laevis], NA	NA	NA	NA	heterogeneous nuclear ribonucleoprotein U-like	0.040988007035690284	0.345747415815255	FALSE	FALSE	FALSE
ENOG411CT7Y	3	5	11	11	1.6595605818578167	0.7830962936544198	1.1282538052719489	0.447815653783997	4	11	1.7272192407866467	ENOG411CT7Y	147904320, Xelaev18012800m.g	GenBank, Xenbase_9.1	rfc2.L	replication factor C (activator 1) 2, 40kDa [Xenopus laevis], NA	P35250	RFC2	NA	Replication factor C (Activator 1) 2, 40kDa	0.04206414828814224	0.3537092217688439	FALSE	FALSE	FALSE
ENOG411CPV1	1	4	3	14	0.7272110266705417	1.7078060788263838	0.5432913045507926	1.032778154505153	2.5	8.5	1.7218171076021147	ENOG411CPV1	147901061, 148230021, Xelaev18019057m.g	GenBank, Xenbase_9.1	farsa.L	phenylalanyl-tRNA synthetase alpha chain B [Xenopus laevis], phenylalanyl-tRNA synthetase alpha chain A [Xenopus laevis], NA	Q9Y285	FARSA	FARS FARSL FARSLA	Phenylalanyl-tRNA synthetase alpha subunit	0.04255132727702856	0.35668416657923	FALSE	FALSE	FALSE
ENOG411CYD2	2	5	5	16	0.7507393534712237	1.6780924341172538	0.5432913045507928	0.9503159943131801	3.5	10.5	1.7174434273652566	ENOG411CYD2	120537950, 148222753, Xelaev18015878m.g, Xelaev18013381m.g	GenBank, Xenbase_9.1	pan2.S, pan2.L	LOC100036851 protein [Xenopus laevis], PAN2 poly(A) specific ribonuclease subunit homolog [Xenopus laevis], NA	Q504Q3	PAN2	KIAA0710 USP52	PAN2 polyA specific ribonuclease subunit homolog (S. cerevisiae)	0.04294909132748033	0.3588933444052575	FALSE	FALSE	FALSE
ENOG411CV0W	4	3	9	11	0.8459472136748417	1.5741026144820363	0.5432913045507926	1.032778154505153	3.5	10	1.7112336442990672	ENOG411CV0W	147898959, 148235525, Xelaev18021809m.g, Xelaev18024537m.g	GenBank, Xenbase_9.1	hsd17b12.L, hsd17b12.S	estradiol 17-beta-dehydrogenase 12-A [Xenopus laevis], estradiol 17-beta-dehydrogenase 12-B [Xenopus laevis], NA	Q53GQ0	HSD17B12	SDR12C1	hydroxysteroid (17-beta) dehydrogenase 12	0.04351899509392335	0.3625227192559223	FALSE	FALSE	FALSE
ENOG411CQPT	0	0	0	7	0	2.411317352187284	0	2.447815653783997	0	3.5	1.705058851324419	ENOG411CQPT	Xelaev18036413m.g	Xenbase_9.1	ubr4.L	NA	NA	NA	NA	Ubiquitin protein ligase E3 component n-recognin 4	0.04409172448946946	0.3650194157425428	FALSE	FALSE	FALSE
ENOG411CV0Q	0	0	0	7	0	2.411317352187284	0	2.447815653783997	0	3.5	1.705058851324419	ENOG411CV0Q	148222989, 148236478, 46249466, Xelaev18018580m.g, Xelaev18020309m.g	GenBank, Xenbase_9.1	ncaph.L, ncaph.S	condensin complex subunit 2 [Xenopus laevis], barren homolog [Xenopus laevis], LOC398069 protein [Xenopus laevis], NA	Q15003	NCAPH	BRRN BRRN1 CAPH KIAA0074	Regulatory subunit of the condensin complex, a complex required for conversion of interphase chromatin into mitotic-like condense chromosomes. The condensin complex probably introduces positive supercoils into relaxed DNA in the presence of type I topoisomerases and converts nicked DNA into positive knotted forms in the presence of type II topoisomerases (By similarity)	0.04409172448946946	0.3650194157425428	FALSE	FALSE	FALSE
ENOG411DFIZ	3	3	11	7	1.6595605818578167	0.7095854272972324	1.1282538052719489	0.447815653783997	3	9	1.6752392086945813	ENOG411DFIZ	147904846, 313661168, Xelaev18020945m.g, Xelaev18017810m.g	GenBank, Xenbase_9.1	kiaa1324l.S, kiaa1324l.L	UPF0577 protein KIAA1324-like homolog precursor [Xenopus laevis], estrogen-induced gene 121-like protein [Xenopus laevis], NA	NA	NA	NA	KIAA1324-like	0.04694365376257493	0.38743003136149806	FALSE	FALSE	FALSE
ENOG411CTD5	1	1	5	4	1.3471557549751167	1.0137891149830645	1.1282538052719489	0.7697437486713592	1	4.5	1.6694401275550212	ENOG411CTD5	148227640, 148228018, Xelaev18022770m.g, Xelaev18025031m.g	GenBank, Xenbase_9.1	dnaja2.L, dnaja2.S	DnaJ subfamily A member 2 [Xenopus laevis], DnaJ (Hsp40) homolog, subfamily A, member 2 [Xenopus laevis], NA	O60884	DNAJA2	CPR3 HIRIP4	DnaJ (Hsp40) homolog, subfamily A, member 2	0.04751509334572384	0.390440716162542	FALSE	FALSE	FALSE
ENOG411CRDC	3	20	11	36	1.6595605818578167	0.7001656930628379	1.1282538052719489	0.26495159663418627	11.5	23.5	1.668578450740466	ENOG411CRDC	Xelaev18039619m.g	Xenbase_9.1	l2hgdh.L	NA	Q9H9P8	L2HGDH	C14orf160	L-2-hydroxyglutarate dehydrogenase	0.04760047624120744	0.390440716162542	FALSE	FALSE	FALSE
ENOG411CUAG	19	39	40	68	1.5568596262145447	0.7941412341444452	0.5789152142815139	0.2344120156748034	29	54	1.6624086509352491	ENOG411CUAG	147899113, Xelaev18022090m.g, Xelaev18024292m.g, Xelaev18037902m.g, Xelaev18036192m.g	GenBank, Xenbase_9.1	ap2a2.L, ap2a2.S, ap2a1.S, ap2a1.L	adaptor-related protein complex 2, alpha 2 subunit [Xenopus laevis], NA	O94973, O95782	AP2A2, AP2A1	ADTAB CLAPA2 HIP9 HYPJ KIAA0899, ADTAA CLAPA1	Adaptor-related protein complex 2, alpha	0.04821543276130192	0.39427543487376554	FALSE	FALSE	FALSE
ENOG411CRFE	1	0	2	5	0.3070070547330004	2.0379023504666143	0.12825380527194893	2.032778154505153	0.5	3.5	1.6581013416847612	ENOG411CRFE	110282964, 126362056, 148227614, 49115557, 887795	GenBank	NA	RecName: Full=Fragile X mental retardation syndrome-related protein 1 homolog A; Short=xFxr1p-A, LOC398050 protein [Xenopus laevis], fragile X mental retardation syndrome-related protein 1 homolog B [Xenopus laevis], FXR1 [Xenopus laevis]	P51116, P51114	FXR2, FXR1	FMR1L2, NA	fragile X mental retardation, autosomal homolog	0.0486485065743966	0.39614154139122815	FALSE	FALSE	FALSE
ENOG411CP6S	0	4	3	9	1.5980745634395823	0.7455544901221587	1.5432913045507926	0.4478156537839968	2	6	1.6571959963593172	ENOG411CP6S	148223053, 148226340, Xelaev18033564m.g, Xelaev18031797m.g	GenBank, Xenbase_9.1	tmx3.S, tmx3.L	thioredoxin-related transmembrane protein 3 precursor [Xenopus laevis], protein disulfide-isomerase TMX3 precursor [Xenopus laevis], NA	Q96JJ7	TMX3	KIAA1830 TXNDC10	thioredoxin-related transmembrane protein 3	0.04873992786750713	0.39614154139122815	FALSE	FALSE	FALSE
ENOG411CPSC	38	63	68	111	1.2476081359541722	1.0863562784675382	0.3664135424667134	0.2551705758416011	50.5	89.5	1.6503620644856807	ENOG411CPSC	147906687, Xelaev18017962m.g, Xelaev18016428m.g, Xelaev18014080m.g, Xelaev18014079m.g, Xelaev18017961m.g	GenBank, Xenbase_9.1	loc100498358.L, loc100489234.S, Xelaev18014080m.g, Xelaev18014079m.g, fam115a-like.L	hypothetical protein LOC494989 [Xenopus laevis], NA	A6NFQ2, Q9Y4C2, A0A1B0GVM2	TCAF2, TCAF1, TCAF2C	FAM115C FAM139A, FAM115A KIAA0738, NA	Family with sequence similarity 115, member	0.04943445259487245	0.40056886738996644	FALSE	FALSE	FALSE
ENOG411CTJ6	19	31	32	65	0.6400161604190953	1.6855295057744348	0.2657573290218838	0.49220977314245046	25	48.5	1.6444091105244323	ENOG411CTJ6	148226749, 148229563	GenBank	NA	insulin-like growth factor 2 mRNA-binding protein 3-A [Xenopus laevis], insulin-like growth factor 2 mRNA-binding protein 3-B [Xenopus laevis]	Q9NZI8, O00425, Q9Y6M1	IGF2BP1, IGF2BP3, IGF2BP2	CRDBP VICKZ1 ZBP1, IMP3 KOC1 VICKZ3, IMP2 VICKZ2	insulin-like growth factor 2 mRNA binding protein	0.05004586224923021	0.4042979929137208	FALSE	FALSE	FALSE
ENOG411D390	0	1	2	4	1.3048031678308571	1.0137891149830645	1.1282538052719489	0.7697437486713592	0.5	3	1.639492325984521	ENOG411D390	147900702	GenBank	NA	mitochondrial ribosomal protein S17 [Xenopus laevis]	Q9Y2R5	MRPS17	RPMS17	ribosomal protein S17	0.0505553837958933	0.40579979184550496	FALSE	FALSE	FALSE
ENOG411CYI4	0	1	2	4	1.3048031678308571	1.0137891149830645	1.1282538052719489	0.7697437486713592	0.5	3	1.639492325984521	ENOG411CYI4	147907176, Xelaev18018480m.g	GenBank, Xenbase_9.1	eif3j-like.L	eukaryotic translation initiation factor 3 subunit J [Xenopus laevis], NA	O75822	EIF3J	EIF3S1	Component of the eukaryotic translation initiation factor 3 (eIF-3) complex, which is required for several steps in the initiation of protein synthesis. The eIF-3 complex associates with the 40S ribosome and facilitates the recruitment of eIF-1, eIF-1A, eIF-2 GTP methionyl-tRNAi and eIF-5 to form the 43S preinitiation complex (43S PIC). The eIF-3 complex stimulates mRNA recruitment to the 43S PIC…	0.0505553837958933	0.40579979184550496	FALSE	FALSE	FALSE
ENOG411CT8B	3	0	4	7	-0.09451261085055432	2.411317352187284	-0.1347806005618449	2.447815653783997	1.5	5.5	1.6382283432843465	ENOG411CT8B	147905704, 148238116, Xelaev18021437m.g	GenBank, Xenbase_9.1	csnk1a1.S	casein kinase 1, alpha 1 [Xenopus laevis], casein kinase I isoform alpha [Xenopus laevis], NA	P48729	CSNK1A1	NA	Casein kinase 1, alpha 1	0.050687034583544746	0.40579979184550496	FALSE	FALSE	FALSE
ENOG411CQPU	0	3	1	10	0.9226215573892205	1.3807234109856308	0.5432913045507926	0.9072472724212941	1.5	5.5	1.6287108465497713	ENOG411CQPU	147901420	GenBank	NA	polymerase (RNA) I polypeptide C, 30kDa [Xenopus laevis]	O15160	POLR1C	POLR1E	Polymerase (RNA) I polypeptide C, 30kDa	0.05168712275794259	0.4124884195974562	FALSE	FALSE	FALSE
ENOG411CXPT	1	0	1	8	-0.2764018151375699	2.5778274065961155	-0.45670869544920745	2.617740655226309	0.5	4.5	1.6273536421165986	ENOG411CXPT	115528812, 148237412, Xelaev18029015m.g, Xelaev18042867m.g, Xelaev18026766m.g	GenBank, Xenbase_9.1	gnpat.S, loc100494829.S, gnpat.L	LOC100158402 protein [Xenopus laevis], MGC84007 protein [Xenopus laevis], NA	O15228	GNPAT	DAPAT DHAPAT	Glycerone-phosphate O-acyltransferase	0.05183100560386884	0.4124884195974562	FALSE	FALSE	FALSE
ENOG411CR66	0	4	1	12	0.9226215573892205	1.3556436331960844	0.5432913045507926	0.8263272770377267	2	6.5	1.6109767656041312	ENOG411CR66	112419319, 120577668, 28422594, 50414537, 77748280, Xelaev18047360m.g	GenBank, Xenbase_9.1	nop58.S	MGC78950 protein [Xenopus laevis], LOC398558 protein [Xenopus laevis], NA	Q9Y2X3	NOP58	NOL5 NOP5	NOP58 ribonucleoprotein homolog (yeast)	0.0535923933340986	0.41393179250113654	FALSE	FALSE	FALSE
ENOG411CQXQ	0	1	3	3	1.5980745634395823	0.6777564202914759	1.5432913045507926	0.447815653783997	0.5	3	1.6092555214306825	ENOG411CQXQ	Xelaev18016129m.g, Xelaev18029867m.g, Xelaev18013668m.g, Xelaev18027796m.g	Xenbase_9.1	wdfy2.S, wdfy1-like.S, wdfy2.L, wdfy1-like.L	NA	Q8IWB7, Q96P53	WDFY1, WDFY2	FENS1 KIAA1435 WDF1 ZFYVE17, WDF2 ZFYVE22	WD repeat and FYVE domain containing	0.0537802402455916	0.41393179250113654	FALSE	FALSE	FALSE
ENOG411CVN3	0	1	3	3	1.5980745634395823	0.6777564202914759	1.5432913045507926	0.447815653783997	0.5	3	1.6092555214306825	ENOG411CVN3	148223497, Xelaev18035429m.g	GenBank, Xenbase_9.1	vps11.L	vacuolar protein sorting 11 homolog [Xenopus laevis], NA	Q9H270	VPS11	RNF108	vacuolar protein sorting 11 homolog (S. cerevisiae)	0.0537802402455916	0.41393179250113654	FALSE	FALSE	FALSE
ENOG411CXYY	1	2	4	7	1.0630801652182171	1.2075138712135043	0.8652193994381551	0.8628531530628408	1.5	5.5	1.605552440482605	ENOG411CXYY	Xelaev18026638m.g	Xenbase_9.1	mrps5.L	NA	P82675	MRPS5	NA	mitochondrial ribosomal protein S5	0.05418614114249442	0.41393179250113654	FALSE	FALSE	FALSE
ENOG411CQDF	0	5	1	14	0.9226215573892205	1.3459595017247779	0.5432913045507926	0.7697437486713592	2.5	7.5	1.604129050570868	ENOG411CQDF	148223321, Xelaev18006197m.g, Xelaev18009735m.g	GenBank, Xenbase_9.1	upf1.L, upf1.S	MGC80941 protein [Xenopus laevis], NA	Q92900	UPF1	KIAA0221 RENT1	UPF1 regulator of nonsense transcripts homolog (Yeast)	0.05434280480932226	0.41393179250113654	FALSE	FALSE	FALSE
ENOG411CPFQ	0	2	2	6	1.3048031678308571	0.9585231467018402	1.1282538052719489	0.6702080751204449	1	4	1.600413385044027	ENOG411CPFQ	46329638, 50370187, Xelaev18025008m.g, Xelaev18022812m.g	GenBank, Xenbase_9.1	dmgdh.S, pdpr.L	LOC414703 protein [Xenopus laevis], LOC445844 protein [Xenopus laevis], NA	Q8NCN5	PDPR	KIAA1990	pyruvate dehydrogenase phosphatase regulatory subunit	0.054753453847353355	0.41393179250113654	FALSE	FALSE	FALSE
ENOG411D06N	0	2	2	6	1.3048031678308571	0.9585231467018402	1.1282538052719489	0.6702080751204449	1	4	1.600413385044027	ENOG411D06N	122936436, 148232754	GenBank	NA	LOC100037082 protein [Xenopus laevis], nuclear pore complex glycoprotein p62 [Xenopus laevis]	P37198, Q9H1M0	NUP62, NUP62CL	NA, NUP62L	nucleoporin 62kDa	0.054753453847353355	0.41393179250113654	FALSE	FALSE	FALSE
ENOG411CWKE	2	9	6	21	1.0284923925464566	1.2292356990953532	0.7656837258872404	0.5853191775339317	5.5	13.5	1.5964548436752866	ENOG411CWKE	118835664, 147899342, 51513432, Xelaev18005812m.g, Xelaev18009488m.g	GenBank, Xenbase_9.1	uso1.L, uso1.S	LOC446301 protein [Xenopus laevis], USO1 vesicle docking protein homolog [Xenopus laevis], NA	O60763	USO1	VDP	USO1 vesicle docking protein homolog (yeast)	0.055193639936891116	0.41393179250113654	FALSE	FALSE	FALSE
ENOG411CPZP	23	49	49	80	1.7693613348570678	0.47224845512967767	0.6021849936043613	0.14380946689389684	36	64.5	1.5850574832737803	ENOG411CPZP	124481734, 148224874, 148232202, Xelaev18032852m.g, Xelaev18013512m.g, Xelaev18015986m.g	GenBank, Xenbase_9.1	pfkp.S, pfkm.L, pfkm.S	LOC100037146 protein [Xenopus laevis], phosphofructokinase, muscle [Xenopus laevis], uncharacterized protein LOC379632 [Xenopus laevis], NA	P08237, Q01813, P17858	PFKM, PFKP, PFKL	PFKX, PFKF, NA	Phosphofructokinase	0.05647663719636908	0.41393179250113654	FALSE	FALSE	FALSE
ENOG411CV5P	1	3	4	9	1.0630801652182171	1.1739840646082114	0.8652193994381551	0.7697437486713592	2	6.5	1.5818432868601287	ENOG411CV5P	Xelaev18034669m.g, Xelaev18036957m.g	Xenbase_9.1	mgea5.L, mgea5.S	NA	O60502	OGA	HEXC KIAA0679 MEA5 MGEA5	Meningioma expressed antigen 5 (Hyaluronidase)	0.05684267521753842	0.41393179250113654	FALSE	FALSE	FALSE
ENOG411CTXS	1	3	4	9	1.0630801652182171	1.1739840646082114	0.8652193994381551	0.7697437486713592	2	6.5	1.5818432868601287	ENOG411CTXS	Xelaev18012483m.g, Xelaev18015169m.g	Xenbase_9.1	mecr.L, mecr.S	NA	Q9BV79	MECR	NBRF1	Mitochondrial trans-2-enoyl-CoA reductase	0.05684267521753842	0.41393179250113654	FALSE	FALSE	FALSE
ENOG411CT9G	8	9	13	26	0.3243728154621357	1.9085374217608242	0.18072122516608446	0.8807750610601031	8.5	19.5	1.5789059705212174	ENOG411CT9G	Xelaev18047090m.g	Xenbase_9.1	rif1.S	NA	Q5UIP0	RIF1	NA	RAP1 interacting factor homolog (yeast)	0.05717881317226267	0.41393179250113654	FALSE	FALSE	FALSE
ENOG411DDA1	0	0	0	6	0	2.232428122919567	0	2.255170575841601	0	3	1.5785650642279812	ENOG411DDA1	205360896, 54038535, Xelaev18001540m.g, Xelaev18004560m.g, Xelaev18001541m.g, Xelaev18001542m.g	GenBank, Xenbase_9.1	Xelaev18001540m.g, Xelaev18004560m.g, loc100493030.1.L, loc100488530-like.1.L	upregulator of cell proliferation [Xenopus laevis], LOC495219 protein [Xenopus laevis], NA	NA	NA	NA	Root hair defective 3 GTP-binding protein (RHD3)	0.05721792661440585	0.41393179250113654	FALSE	FALSE	FALSE
ENOG411CWKS	0	0	0	6	0	2.232428122919567	0	2.255170575841601	0	3	1.5785650642279812	ENOG411CWKS	130774478, Xelaev18015253m.g, Xelaev18012573m.g	GenBank, Xenbase_9.1	kdm1a.S, kdm1a.L	LSD1 [Xenopus laevis], NA	O60341	KDM1A	AOF2 KDM1 KIAA0601 LSD1	Lysine (K)-specific demethylase 1A	0.05721792661440585	0.41393179250113654	FALSE	FALSE	FALSE
ENOG411CQQF	9	16	15	39	0.4120134505943193	1.8191807526238837	0.22136320966343032	0.6822809074210199	12.5	27	1.577692551239707	ENOG411CQQF	123895418, 148225368, Xelaev18024927m.g	GenBank, Xenbase_9.1	usp10.S	RecName: Full=Ubiquitin carboxyl-terminal hydrolase 10-A; AltName: Full=Deubiquitinating enzyme 10-A; AltName: Full=Ubiquitin thiolesterase 10-A; AltName: Full=Ubiquitin-specific-processing protease 10-A, ubiquitin carboxyl-terminal hydrolase 10-B [Xenopus laevis], NA	Q14694	USP10	KIAA0190	ubiquitin specific peptidase 10	0.05731812917943472	0.41393179250113654	FALSE	FALSE	FALSE
ENOG411CWH3	0	1	1	5	0.9226215573892205	1.297537405746528	0.5432913045507926	1.032778154505153	0.5	3	1.569889458145382	ENOG411CWH3	110287969, 147903310, 49119081, 58402642, 83405638, Xelaev18007309m.g	GenBank, Xenbase_9.1	supt16h.L	RecName: Full=FACT complex subunit SPT16; AltName: Full=DNA unwinding factor 140 kDa subunit; Short=DUF140; AltName: Full=Facilitates chromatin transcription complex subunit spt16, FACT complex subunit SPT16 [Xenopus laevis], Unknown (protein for IMAGE:5048405) [Xenopus laevis], LOC733160 protein [Xenopus laevis], Unknown (protein for MGC:132046) [Xenopus laevis], NA	Q9Y5B9	SUPT16H	FACT140 FACTP140	suppressor of Ty 16 homolog (S. cerevisiae)	0.05822041526236012	0.41393179250113654	FALSE	FALSE	FALSE
ENOG411D479	0	0	2	1	1.3048031678308571	0.911348329855701	1.1282538052719489	0.447815653783997	0	1.5	1.5670557521508885	ENOG411D479	126631441, 148237731, Xelaev18043929m.g, Xelaev18022570m.g, Xelaev18024816m.g, Xelaev18046610m.g	GenBank, Xenbase_9.1	dynlrb1.L, Xelaev18022570m.g, Xelaev18024816m.g, dynlrb1.S	LOC100049099 protein [Xenopus laevis], dynein, light chain, roadblock-type 1 [Xenopus laevis], NA	Q9NP97, Q8TF09	DYNLRB1, DYNLRB2	BITH DNCL2A DNLC2A ROBLD1, DNCL2B DNLC2B ROBLD2	dynein light chain roadblock-type	0.05855083027268989	0.41393179250113654	FALSE	FALSE	FALSE
ENOG411CRG1	0	0	2	1	1.3048031678308571	0.911348329855701	1.1282538052719489	0.447815653783997	0	1.5	1.5670557521508885	ENOG411CRG1	116063404	GenBank	NA	MGC154488 protein [Xenopus laevis]	Q7Z7A3	CTU1	ATPBD3 NCS6	cytosolic thiouridylase subunit 1 homolog (S. pombe)	0.05855083027268989	0.41393179250113654	FALSE	FALSE	FALSE
ENOG411CXAG	0	0	2	1	1.3048031678308571	0.911348329855701	1.1282538052719489	0.447815653783997	0	1.5	1.5670557521508885	ENOG411CXAG	148222561, 148232573, 27696700, 495672, 80477550, Xelaev18018052m.g	GenBank, Xenbase_9.1	loc100158581.L	protein tyrosine phosphatase, non-receptor type 9 [Xenopus laevis], tyrosine phosphatase [Xenopus laevis], MGC52584 protein [Xenopus laevis], NA	P43378	PTPN9	NA	protein tyrosine phosphatase, non-receptor type 9	0.05855083027268989	0.41393179250113654	FALSE	FALSE	FALSE
ENOG411CU6I	0	0	2	1	1.3048031678308571	0.911348329855701	1.1282538052719489	0.447815653783997	0	1.5	1.5670557521508885	ENOG411CU6I	148223543, Xelaev18039951m.g	GenBank, Xenbase_9.1	srp54.L	signal recognition particle 54kDa [Xenopus laevis], NA	P61011	SRP54	NA	signal recognition particle 54kDa	0.05855083027268989	0.41393179250113654	FALSE	FALSE	FALSE
ENOG411CU19	0	0	2	1	1.3048031678308571	0.911348329855701	1.1282538052719489	0.447815653783997	0	1.5	1.5670557521508885	ENOG411CU19	Xelaev18039545m.g	Xenbase_9.1	trip11.L	NA	Q15643	TRIP11	CEV14	thyroid hormone receptor interactor 11	0.05855083027268989	0.41393179250113654	FALSE	FALSE	FALSE
ENOG411CXXF	0	0	2	1	1.3048031678308571	0.911348329855701	1.1282538052719489	0.447815653783997	0	1.5	1.5670557521508885	ENOG411CXXF	148230567, 46329779, Xelaev18043450m.g, Xelaev18046183m.g	GenBank, Xenbase_9.1	dpm1.L, dpm1.S	dolichyl-phosphate mannosyltransferase polypeptide 1, catalytic subunit [Xenopus laevis], LOC414689 protein [Xenopus laevis], NA	O60762	DPM1	NA	Dolichyl-phosphate mannosyltransferase polypeptide 1, catalytic subunit	0.05855083027268989	0.41393179250113654	FALSE	FALSE	FALSE
ENOG411CVYW	0	0	2	1	1.3048031678308571	0.911348329855701	1.1282538052719489	0.447815653783997	0	1.5	1.5670557521508885	ENOG411CVYW	148235523, 148237113, 148238052, 347300435, Xelaev18009534m.g	GenBank, Xenbase_9.1	cnot6l.S	uncharacterized protein LOC779198 [Xenopus laevis], CCR4-NOT transcription complex subunit 6-like-B [Xenopus laevis], CCR4-NOT transcription complex subunit 6-like-A [Xenopus laevis], CCR4-NOT transcription complex subunit 6 [Xenopus laevis], NA	Q96LI5, Q9ULM6	CNOT6L, CNOT6	CCR4B, CCR4 CCR4a KIAA1194	CCR4-NOT transcription complex subunit	0.05855083027268989	0.41393179250113654	FALSE	FALSE	FALSE
ENOG411CSKY	0	0	2	1	1.3048031678308571	0.911348329855701	1.1282538052719489	0.447815653783997	0	1.5	1.5670557521508885	ENOG411CSKY	148222866, 300086, 47682860, Xelaev18038724m.g, Xelaev18041965m.g	GenBank, Xenbase_9.1	Xelaev18038724m.g, Xelaev18041965m.g	chromosome-associated kinesin KIF4 [Xenopus laevis], Klp=kinesin-like protein {clone XKLp1} [Xenopus laevis, oocytes, Peptide Partial, 330 aa], Kif4a-A-prov protein [Xenopus laevis], NA	O95239, Q2VIQ3	KIF4A, KIF4B	KIF4, NA	Kinesin family member 4A	0.05855083027268989	0.41393179250113654	FALSE	FALSE	FALSE
ENOG411CZ9V	0	0	2	1	1.3048031678308571	0.911348329855701	1.1282538052719489	0.447815653783997	0	1.5	1.5670557521508885	ENOG411CZ9V	148230292, Xelaev18040875m.g	GenBank, Xenbase_9.1	tdrkh.L	tudor and KH domain containing [Xenopus laevis], NA	Q9Y2W6	TDRKH	TDRD2	Tudor and KH domain containing	0.05855083027268989	0.41393179250113654	FALSE	FALSE	FALSE
ENOG411CUS2	0	0	2	1	1.3048031678308571	0.911348329855701	1.1282538052719489	0.447815653783997	0	1.5	1.5670557521508885	ENOG411CUS2	13122446, 14030433, 147903399, Xelaev18026558m.g	GenBank, Xenbase_9.1	bub1.L	protein kinase Bub1 [Xenopus laevis], spindle checkpoint protein Bub1 [Xenopus laevis], BUB1 budding uninhibited by benzimidazoles 1 homolog [Xenopus laevis], NA	O43683	BUB1	BUB1L	Budding uninhibited by benzimidazoles 1 homolog	0.05855083027268989	0.41393179250113654	FALSE	FALSE	FALSE
ENOG411CWTU	3	6	8	15	1.0374882177512812	1.1783120496360815	0.7132163059931051	0.6404607317263928	4.5	11.5	1.5668073948245693	ENOG411CWTU	189442240, Xelaev18027789m.g, Xelaev18042117m.g, Xelaev18029864m.g, Xelaev18038796m.g	GenBank, Xenbase_9.1	acsl3.L, acsl4.S, acsl3.S, acsl4.L	LOC100174803 protein [Xenopus laevis], NA	O95573, O60488	ACSL3, ACSL4	ACS3 FACL3 LACS3, ACS4 FACL4 LACS4	Acyl-CoA synthetase long-chain family member	0.0585798591973108	0.41393179250113654	FALSE	FALSE	FALSE
ENOG411CPMA	9	12	18	27	0.9213474396408471	1.29160830902472	0.4692907231070158	0.5547308577005089	10.5	22.5	1.5647960163471752	ENOG411CPMA	Xelaev18026243m.g	Xenbase_9.1	iars2.L	NA	Q9NSE4	IARS2	NA	Isoleucyl-tRNA synthetase 2, mitochondrial	0.05881537306468667	0.41393179250113654	FALSE	FALSE	FALSE
ENOG411CR9Y	0	0	1	2	0.9226215573892205	1.2888515295454006	0.5432913045507926	1.032778154505153	0	1.5	1.5637476161830177	ENOG411CR9Y	148234567, Xelaev18010657m.g, Xelaev18007845m.g	GenBank, Xenbase_9.1	pptc7.S, pptc7.L	protein phosphatase PTC7 homolog [Xenopus laevis], NA	Q8NI37	PPTC7	TAPP2C	PTC7 protein phosphatase homolog (S. cerevisiae)	0.058938425307499195	0.41393179250113654	FALSE	FALSE	FALSE
ENOG411CY8W	0	0	1	2	0.9226215573892205	1.2888515295454006	0.5432913045507926	1.032778154505153	0	1.5	1.5637476161830177	ENOG411CY8W	117558237, 147901335	GenBank	NA	LOC100036797 protein [Xenopus laevis], zinc finger CCCH-type containing 10 [Xenopus laevis]	Q96K80	ZC3H10	ZC3HDC10	Zinc finger CCCH-type containing 10	0.058938425307499195	0.41393179250113654	FALSE	FALSE	FALSE
ENOG411CR65	0	0	1	2	0.9226215573892205	1.2888515295454006	0.5432913045507926	1.032778154505153	0	1.5	1.5637476161830177	ENOG411CR65	148228474, 148233842, Xelaev18037567m.g	GenBank, Xenbase_9.1	Xelaev18037567m.g	uncharacterized protein LOC432173 precursor [Xenopus laevis], reticulocalbin 2 precursor [Xenopus laevis], NA	Q14257	RCN2	ERC55	Reticulocalbin 2, EF-hand calcium binding domain	0.058938425307499195	0.41393179250113654	FALSE	FALSE	FALSE
ENOG411CUX3	0	0	1	2	0.9226215573892205	1.2888515295454006	0.5432913045507926	1.032778154505153	0	1.5	1.5637476161830177	ENOG411CUX3	147900604, Xelaev18037238m.g	GenBank, Xenbase_9.1	prpf19.S	PRP19/PSO4 pre-mRNA processing factor 19 homolog [Xenopus laevis], NA	Q9UMS4	PRPF19	NMP200 PRP19 SNEV	PRP19 PSO4 pre-mRNA processing factor 19 homolog (S. cerevisiae)	0.058938425307499195	0.41393179250113654	FALSE	FALSE	FALSE
ENOG411CPNQ	0	0	1	2	0.9226215573892205	1.2888515295454006	0.5432913045507926	1.032778154505153	0	1.5	1.5637476161830177	ENOG411CPNQ	169642137, Xelaev18027241m.g, Xelaev18020311m.g, Xelaev18018578m.g	GenBank, Xenbase_9.1	Xetrov90013451m.L, snrnp200.S, snrnp200.L	LOC100158290 protein [Xenopus laevis], NA	Q8N3C0, O75643	ASCC3, SNRNP200	HELIC1, ASCC3L1 HELIC2 KIAA0788	activating signal cointegrator 1 complex subunit 3	0.058938425307499195	0.41393179250113654	FALSE	FALSE	FALSE
ENOG411DDEQ	0	0	1	2	0.9226215573892205	1.2888515295454006	0.5432913045507926	1.032778154505153	0	1.5	1.5637476161830177	ENOG411DDEQ	12004322	GenBank	NA	developmental regulator [Xenopus laevis]	O14908	GIPC1	C19orf3 GIPC RGS19IP1	GIPC PDZ domain containing family, member 1	0.058938425307499195	0.41393179250113654	FALSE	FALSE	FALSE
ENOG411D5MH	0	0	1	2	0.9226215573892205	1.2888515295454006	0.5432913045507926	1.032778154505153	0	1.5	1.5637476161830177	ENOG411D5MH	163916135, Xelaev18007412m.g	GenBank, Xenbase_9.1	Xelaev18007412m.g	LOC100137668 protein [Xenopus laevis], NA	Q9UDW1	UQCR10	UCRC	ubiquinol-cytochrome c reductase, complex III subunit X	0.058938425307499195	0.41393179250113654	FALSE	FALSE	FALSE
ENOG411CWCS	0	0	1	2	0.9226215573892205	1.2888515295454006	0.5432913045507926	1.032778154505153	0	1.5	1.5637476161830177	ENOG411CWCS	Xelaev18001081m.g	Xenbase_9.1	Xetrov90029794m.S	NA	Q8TE02	ELP5	C17orf81 DERP6	elongator acetyltransferase complex subunit 5	0.058938425307499195	0.41393179250113654	FALSE	FALSE	FALSE
ENOG411CUV3	0	0	1	2	0.9226215573892205	1.2888515295454006	0.5432913045507926	1.032778154505153	0	1.5	1.5637476161830177	ENOG411CUV3	Xelaev18026244m.g	Xenbase_9.1	rab3gap2.L	NA	Q9H2M9	RAB3GAP2	KIAA0839	RAB3 GTPase activating protein subunit 2 (Non-catalytic)	0.058938425307499195	0.41393179250113654	FALSE	FALSE	FALSE
ENOG411CYVT	0	0	1	2	0.9226215573892205	1.2888515295454006	0.5432913045507926	1.032778154505153	0	1.5	1.5637476161830177	ENOG411CYVT	Xelaev18036360m.g	Xenbase_9.1	usp48.L	NA	Q86UV5	USP48	USP31	ubiquitin specific peptidase 48	0.058938425307499195	0.41393179250113654	FALSE	FALSE	FALSE
ENOG411DD74	0	0	1	2	0.9226215573892205	1.2888515295454006	0.5432913045507926	1.032778154505153	0	1.5	1.5637476161830177	ENOG411DD74	Xelaev18012944m.g, Xelaev18015510m.g	Xenbase_9.1	map4k4-like.L, map4k4-like.S	NA	O95819	MAP4K4	HGK KIAA0687 NIK	mitogen-activated protein kinase kinase kinase kinase 4	0.058938425307499195	0.41393179250113654	FALSE	FALSE	FALSE
ENOG411DCP2	0	0	1	2	0.9226215573892205	1.2888515295454006	0.5432913045507926	1.032778154505153	0	1.5	1.5637476161830177	ENOG411DCP2	Xelaev18021567m.g, Xelaev18017051m.g	Xenbase_9.1	diaph1.S, diaph1.L	NA	O60610	DIAPH1	DIAP1	DRF Autoregulatory Domain	0.058938425307499195	0.41393179250113654	FALSE	FALSE	FALSE
ENOG411CSN7	0	0	1	2	0.9226215573892205	1.2888515295454006	0.5432913045507926	1.032778154505153	0	1.5	1.5637476161830177	ENOG411CSN7	148230641, 148236974, Xelaev18005686m.g	GenBank, Xenbase_9.1	mad2l1.L	uncharacterized protein LOC414724 [Xenopus laevis], MAD2 mitotic arrest deficient-like 1 [Xenopus laevis], NA	Q13257	MAD2L1	MAD2	MAD2 mitotic arrest deficient-like 1 (Yeast)	0.058938425307499195	0.41393179250113654	FALSE	FALSE	FALSE
ENOG411D4X6	0	0	1	2	0.9226215573892205	1.2888515295454006	0.5432913045507926	1.032778154505153	0	1.5	1.5637476161830177	ENOG411D4X6	147900959, 147905580	GenBank	NA	ribosomal protein, large, P1 [Xenopus laevis], uncharacterized protein LOC734491 [Xenopus laevis]	P05386	RPLP1	RRP1	ribosomal protein, large, P1	0.058938425307499195	0.41393179250113654	FALSE	FALSE	FALSE
ENOG411D4U7	0	0	1	2	0.9226215573892205	1.2888515295454006	0.5432913045507926	1.032778154505153	0	1.5	1.5637476161830177	ENOG411D4U7	126632065, 51873804, Xelaev18010209m.g, Xelaev18007009m.g	GenBank, Xenbase_9.1	nedd8.S, nedd8.L	Unknown (protein for MGC:161083) [Xenopus laevis], LOC446966 protein [Xenopus laevis], NA	Q15843	NEDD8	NA	neural precursor cell expressed, developmentally down-regulated 8	0.058938425307499195	0.41393179250113654	FALSE	FALSE	FALSE
ENOG411CQDS	0	0	1	2	0.9226215573892205	1.2888515295454006	0.5432913045507926	1.032778154505153	0	1.5	1.5637476161830177	ENOG411CQDS	32442466, Xelaev18012544m.g, Xelaev18015216m.g, Xelaev18027374m.g, Xelaev18029483m.g	GenBank, Xenbase_9.1	khdrbs1.L, khdrbs1.S, khdrbs2.L, khdrbs2.S	KH domain RNA-binding protein Sam68 [Xenopus laevis], NA	Q07666, Q5VWX1	KHDRBS1, KHDRBS2	SAM68, SLM1	KH domain containing, RNA binding, signal transduction associated	0.058938425307499195	0.41393179250113654	FALSE	FALSE	FALSE
ENOG411CVE5	2	7	14	9	2.57299136721455	-0.36199838542890866	1.865219399438155	-0.2302562513286408	4.5	11.5	1.5634081305764915	ENOG411CVE5	49119610, Xelaev18026434m.g	GenBank, Xenbase_9.1	aars2.L	LOC443692 protein [Xenopus laevis], NA	Q5JTZ9	AARS2	AARSL KIAA1270	Alanyl-tRNA synthetase 2, mitochondrial	0.058978314488755804	0.41393179250113654	FALSE	FALSE	FALSE
ENOG411CRI6	2	7	9	13	1.7118058235169509	0.491467649459639	1.2802568987169987	0.2551705758416011	4.5	11	1.557949613550182	ENOG411CRI6	120537910	GenBank	NA	RFC2 protein [Xenopus laevis]	P35249	RFC4	NA	Replication factor C (Activator 1) 4, 37kDa	0.059622596414556354	0.4173581749018945	FALSE	FALSE	FALSE
ENOG411D1XK	5	8	14	16	1.456985707266452	0.7253983627995724	0.865219399438155	0.36535349359202385	6.5	15	1.5431785750971831	ENOG411D1XK	148236013, Xelaev18023422m.g	GenBank, Xenbase_9.1	rtca.L	RNA terminal phosphate cyclase domain 1 [Xenopus laevis], NA	O00442	RTCA	RPC RPC1 RTC1 RTCD1	RNA 3'-terminal phosphate cyclase	0.06139372706747108	0.42863401090970665	FALSE	FALSE	FALSE
ENOG411CT2D	6	16	18	27	1.7818217789802384	0.3889062263270554	0.9838638959367741	0.16770773459126173	11	22.5	1.5349364926643352	ENOG411CT2D	115528668, Xelaev18047477m.g, Xelaev18045124m.g	GenBank, Xenbase_9.1	usp7.S, usp7.L	LOC100158365 protein [Xenopus laevis], NA	Q93009	USP7	HAUSP	ubiquitin specific peptidase 7 (herpes virus-associated)	0.06239971424841692	0.43452301015694494	FALSE	FALSE	FALSE
ENOG411CZCC	0	7	2	15	1.3048031678308571	0.8572694095313581	1.1282538052719489	0.447815653783997	3.5	8.5	1.5288161808702987	ENOG411CZCC	115528353, 148230426, 148234716	GenBank	NA	Fen1-A protein [Xenopus laevis], flap endonuclease 1-A [Xenopus laevis], flap endonuclease 1-B [Xenopus laevis]	P39748	FEN1	RAD2	Structure-specific nuclease with 5'-flap endonuclease and 5'-3' exonuclease activities involved in DNA replication and repair. During DNA replication, cleaves the 5'-overhanging flap structure that is generated by displacement synthesis when DNA polymerase encounters the 5'-end of a downstream Okazaki fragment. It enters the flap from the 5'-end and then tracks to cleave the flap base, leaving a …	0.0631550099527593	0.4381645122515101	FALSE	FALSE	FALSE
ENOG411CU2V	0	1	0	9	0	2.157958478269589	0	1.7697437486713592	0.5	4.5	1.5259070735034292	ENOG411CU2V	147900472, 148226721, 148231281, Xelaev18046619m.g, Xelaev18043948m.g	GenBank, Xenbase_9.1	rbm39.S, rbm39.L	MGC81970 protein [Xenopus laevis], RNA binding motif protein 39 [Xenopus laevis], RNA binding motif protein 23 [Xenopus laevis], NA	Q14498	RBM39	HCC1 RNPC2	RNA binding motif protein	0.06351650441874591	0.4381645122515101	FALSE	FALSE	FALSE
ENOG411CUU4	32	66	55	118	0.9352075905280199	1.2221633982524678	0.3062521072499432	0.27654422663416817	49	86.5	1.5254916557018101	ENOG411CUU4	147900889, Xelaev18021444m.g	GenBank, Xenbase_9.1	lars.S	leucyl-tRNA synthetase [Xenopus laevis], NA	Q9P2J5	LARS	KIAA1352	leucyl-trna synthetase	0.06356825661989146	0.4381645122515101	FALSE	FALSE	FALSE
ENOG411CW4Q	5	7	8	22	0.2256469257893089	1.9316124000473243	0.12825380527194893	0.9713776098410097	6	15	1.525412698077003	ENOG411CW4Q	147900676, Xelaev18024681m.g	GenBank, Xenbase_9.1	edc4.S	enhancer of mRNA-decapping protein 4 [Xenopus laevis], NA	Q6P2E9	EDC4	HEDLS	Enhancer of mRNA decapping 4	0.06357809676648687	0.4381645122515101	FALSE	FALSE	FALSE
ENOG411CR0J	10	16	21	32	1.121230319752606	1.0260662659689	0.5432913045507928	0.40474693189211103	13	26.5	1.5183679769823972	ENOG411CR0J	147905870, 148232018, 148236155, 51895816, Xelaev18015103m.g, Xelaev18011617m.g	GenBank, Xenbase_9.1	Xelaev18015103m.g, ctps2.L	CTP synthase 1-B [Xenopus laevis], CTP synthase 2 [Xenopus laevis], CTP synthase 1-A [Xenopus laevis], Ctps-a protein [Xenopus laevis], NA	P17812, Q9NRF8	CTPS1, CTPS2	CTPS, NA	CTP synthase	0.06446082989575103	0.4431060646304325	FALSE	FALSE	FALSE
ENOG411CP8D	3	10	8	22	1.0374882177512812	1.1076079117287838	0.7132163059931051	0.5119459912037125	6.5	15	1.5168120194523702	ENOG411CP8D	148235539, Xelaev18010891m.g	GenBank, Xenbase_9.1	col4a3bp.S	collagen type IV alpha-3-binding protein [Xenopus laevis], NA	Q9Y5P4	COL4A3BP	CERT STARD11	collagen, type IV, alpha 3 (Goodpasture antigen) binding protein	0.064657075764786	0.44331543742317375	FALSE	FALSE	FALSE
ENOG411CS4C	0	2	8	2	2.609837352644535	-0.4672277799597364	2.713216305993105	-0.552184346216003	1	5	1.5150537582806318	ENOG411CS4C	147904439, 148223265, Xelaev18016672m.g	GenBank, Xenbase_9.1	nup50.L	uncharacterized protein LOC503671 [Xenopus laevis], nucleoporin 50kDa [Xenopus laevis], NA	Q9UKX7	NUP50	NPAP60L	nucleoporin 50kDa	0.06487939536813553	0.4437020542567632	FALSE	FALSE	FALSE
ENOG411CS1E	1	0	2	4	0.3070070547330004	1.822740620542688	0.12825380527194893	1.7697437486713592	0.5	3	1.5059590234037243	ENOG411CS1E	147904310, 28628267, Xelaev18022865m.g, Xelaev18031282m.g	GenBank, Xenbase_9.1	anln-like.1.L, anln.L	actin-binding protein anillin [Xenopus laevis], contractile ring component anillin [Xenopus laevis], NA	Q9NQW6	ANLN	NA	Anillin, actin binding protein	0.06603884654125972	0.44592897891749617	FALSE	FALSE	FALSE
ENOG411CT1I	1	0	2	4	0.3070070547330004	1.822740620542688	0.12825380527194893	1.7697437486713592	0.5	3	1.5059590234037243	ENOG411CT1I	116063372, 122936402, 189441692, 288557246, 32822858, 84570035, Xelaev18002750m.g, Xelaev18031673m.g	GenBank, Xenbase_9.1	ranbp9.S, ranbp9.L	Unknown (protein for IMAGE:3397851) [Xenopus laevis], LOC779045 protein [Xenopus laevis], ran-binding protein 9 [Xenopus laevis], LOC398677 protein [Xenopus laevis], NA	Q96S59, Q6VN20	RANBP9, RANBP10	RANBPM, KIAA1464	ran binding protein	0.06603884654125972	0.44592897891749617	FALSE	FALSE	FALSE
ENOG411CWQ6	1	0	2	4	0.3070070547330004	1.822740620542688	0.12825380527194893	1.7697437486713592	0.5	3	1.5059590234037243	ENOG411CWQ6	116487984, Xelaev18016500m.g, Xelaev18013962m.g	GenBank, Xenbase_9.1	stim1.S, stim1.L	Stim1 protein [Xenopus laevis], NA	Q13586	STIM1	GOK	stromal interaction molecule 1	0.06603884654125972	0.44592897891749617	FALSE	FALSE	FALSE
ENOG411CV1V	1	0	2	4	0.3070070547330004	1.822740620542688	0.12825380527194893	1.7697437486713592	0.5	3	1.5059590234037243	ENOG411CV1V	Xelaev18019903m.g	Xenbase_9.1	polr3b.S	NA	Q9NW08	POLR3B	NA	polymerase (RNA) III (DNA directed) polypeptide B	0.06603884654125972	0.44592897891749617	FALSE	FALSE	FALSE
ENOG411CXVH	1	0	2	4	0.3070070547330004	1.822740620542688	0.12825380527194893	1.7697437486713592	0.5	3	1.5059590234037243	ENOG411CXVH	Xelaev18022128m.g	Xenbase_9.1	lgals12.L	NA	Q96DT0	LGALS12	GRIP1	Lectin, galactoside-binding, soluble, 12	0.06603884654125972	0.44592897891749617	FALSE	FALSE	FALSE
ENOG411CW2E	0	4	3	8	1.5980745634395823	0.5128846071044783	1.5432913045507926	0.29581256033894676	2	5.5	1.4926735442996346	ENOG411CW2E	115529163, 148230330, Xelaev18043837m.g	GenBank, Xenbase_9.1	aarsd1.L	Aarsd1-a protein [Xenopus laevis], alanyl-tRNA synthetase domain containing 1 [Xenopus laevis], NA	Q9BTE6	AARSD1	NA	alanyl-tRNA synthetase domain containing 1	0.06776133087205759	0.4564075535311889	FALSE	FALSE	FALSE
ENOG411CVGW	1	4	6	8	1.5959913177930014	0.5128846071044783	1.3506462266083967	0.29581256033894676	2.5	7	1.4912004671760601	ENOG411CVGW	147902688, Xelaev18020849m.g, Xelaev18017940m.g	GenBank, Xenbase_9.1	lmf2.S, lmf2.L	lipase maturation factor 2 [Xenopus laevis], NA	Q9BU23	LMF2	TMEM112B TMEM153	Lipase maturation factor 2	0.06795443553488192	0.4565581925132519	FALSE	FALSE	FALSE
ENOG411CSJZ	2	0	3	5	0.06299406474440446	2.0379023504666143	-0.041671196170363696	2.032778154505153	1	4	1.4855581017662196	ENOG411CSJZ	50418281, Xelaev18016776m.g, Xelaev18015564m.g, Xelaev18013025m.g	GenBank, Xenbase_9.1	cyfip2.L, cyfip1.S, cyfip1.L	CYFIP1 protein [Xenopus laevis], NA	Q7L576	CYFIP1	KIAA0068	cytoplasmic FMR1 interacting protein	0.06869802217345684	0.4588169246240399	FALSE	FALSE	FALSE
ENOG411CVUP	5	0	6	7	-0.3111469937800581	2.411317352187284	-0.23431627411275957	2.447815653783997	2.5	6.5	1.4850447020767312	ENOG411CVUP	148237594, 27503878, Xelaev18008389m.g	GenBank, Xenbase_9.1	zfr.L	zinc finger RNA-binding protein [Xenopus laevis], Zfr protein [Xenopus laevis], NA	Q96KR1, Q9UPR6	ZFR, ZFR2	NA, KIAA1086	zinc finger RNA binding protein	0.06876599146555507	0.4588169246240399	FALSE	FALSE	FALSE
ENOG411CZRH	20	26	34	53	0.6944282389190319	1.402601561316368	0.28025689871699905	0.4478156537839968	23	43.5	1.482823992096722	ENOG411CZRH	148227728, Xelaev18008754m.g	GenBank, Xenbase_9.1	dctn1.S	dynactin subunit 1 [Xenopus laevis], NA	Q14203	DCTN1	NA	Dynactin 1	0.06906058995458167	0.4588169246240399	FALSE	FALSE	FALSE
ENOG411CX0G	2	5	5	14	0.7507393534712237	1.3459595017247779	0.5432913045507928	0.7697437486713592	3.5	9.5	1.4825899786151637	ENOG411CX0G	161612009, Xelaev18008139m.g	GenBank, Xenbase_9.1	mrps27.L	LOC100127333 protein [Xenopus laevis], NA	Q92552	MRPS27	KIAA0264	Mitochondrial ribosomal protein S27	0.06909169065046218	0.4588169246240399	FALSE	FALSE	FALSE
ENOG411CURF	1	9	8	14	2.022727217053003	0.0733668981034594	1.7132163059931051	0.032778154505153104	5	11	1.4821623628323501	ENOG411CURF	118763696, 148234026, 27370842, 46249846, Xelaev18005164m.g	GenBank, Xenbase_9.1	ncapg.L	LOC398088 protein [Xenopus laevis], condensin complex subunit 3 [Xenopus laevis], NA	Q9BPX3	NCAPG	CAPG NYMEL3	Non-SMC condensin I complex subunit G	0.06914854922344356	0.4588169246240399	FALSE	FALSE	FALSE
ENOG411CS9M	23	35	43	63	1.1658182523271223	0.9265453259359449	0.4177604224669338	0.2778906523416845	29	53	1.4795244748975642	ENOG411CS9M	148744489, Xelaev18011482m.g	GenBank, Xenbase_9.1	gart.L	LOC100101294 protein [Xenopus laevis], NA	P22102	GART	PGFT PRGS	Phosphoribosylglycinamide formyltransferase, phosphoribosylglycinamide synthetase, phosphoribosylaminoimidazole synthetase	0.0695000975007343	0.46000807108159286	FALSE	FALSE	FALSE
ENOG411CTGA	1	7	6	13	1.5959913177930014	0.491467649459639	1.3506462266083967	0.2551705758416011	4	9.5	1.4760563911930091	ENOG411CTGA	147898955, 148222482, 148225646, 213623534, Xelaev18021903m.g, Xelaev18024454m.g, Xelaev18017957m.g	GenBank, Xenbase_9.1	cttn.L, cttn.S, cttn-like.1.L	hypothetical protein LOC398923 [Xenopus laevis], cortactin [Xenopus laevis], Cttn protein [Xenopus laevis], NA	Q14247	CTTN	EMS1	Hematopoietic cell-specific lyn substrate 1	0.06996437723770063	0.4619376413175592	FALSE	FALSE	FALSE
ENOG411CTYA	1	4	3	12	0.7272110266705417	1.3556436331960844	0.5432913045507926	0.8263272770377267	2.5	7.5	1.472800654217691	ENOG411CTYA	148222262, 148231320, 148233074, 148234227, Xelaev18047172m.g, Xelaev18032982m.g, Xelaev18014513m.g, Xelaev18011778m.g	GenBank, Xenbase_9.1	pdk1.S, pdk4.S, pdk3.S, pdk3.L	pyruvate dehydrogenase kinase 2 [Xenopus laevis], pyruvate dehydrogenase kinase, isozyme 1 [Xenopus laevis], uncharacterized protein LOC494745 [Xenopus laevis], uncharacterized protein LOC398840 [Xenopus laevis], NA	Q15119, Q15120, Q16654	PDK2, PDK3, PDK4	PDHK2, PDHK3, PDHK4	Pyruvate dehydrogenase kinase, isozyme	0.07040239794811776	0.46368475889967214	FALSE	FALSE	FALSE
ENOG411CWN1	1	4	7	7	1.8191648725954959	0.26088224050584113	1.5432913045507926	0.1258875588966346	2.5	7	1.470815418861457	ENOG411CWN1	Xelaev18023926m.g, Xelaev18023925m.g	Xenbase_9.1	ssuh2.L, Xelaev18023925m.g	NA	Q9Y2M2	SSUH2	C3orf32	ssu-2 homolog (C. elegans)	0.0706705207156854	0.46430705747848344	FALSE	FALSE	FALSE
ENOG411CVHG	2	2	4	9	0.43419275757670456	1.6418628635537411	0.2802568987169987	1.1847812479502031	2	6.5	1.4679930078217878	ENOG411CVHG	147903171, 147904637, 28277340, Xelaev18010235m.g, Xelaev18024882m.g, Xelaev18004715m.g	GenBank, Xenbase_9.1	ap1g2.S, ap1g1.S, ap1g1.L	adaptor-related protein complex 1, gamma 2 subunit [Xenopus laevis], adaptor-related protein complex 1, gamma 1 subunit [Xenopus laevis], Wu:fc30a11 protein [Xenopus laevis], NA	O43747, O75843	AP1G1, AP1G2	ADTG CLAPG1, NA	Adaptor-related protein complex 1, gamma	0.07105306111151231	0.4656761897357449	FALSE	FALSE	FALSE
ENOG411CTRV	1	6	4	14	1.0630801652182171	1.0035860304707585	0.8652193994381551	0.5473513273349114	3.5	9	1.4613536814206791	ENOG411CTRV	Xelaev18041677m.g	Xenbase_9.1	nup188.S	NA	Q5SRE5	NUP188	KIAA0169	Nucleoporin 188kDa	0.0719592025063252	0.46835882211374746	FALSE	FALSE	FALSE
ENOG411CTF4	1	3	2	12	0.3070070547330004	1.756075445036376	0.12825380527194893	1.1482553719250892	2	7	1.45881962573422	ENOG411CTF4	148225927, 148229117, 28302315, 65253, Xelaev18045870m.g	GenBank, Xenbase_9.1	jup.S	junction plakoglobin [Xenopus laevis], LOC398496 protein [Xenopus laevis], X-plakoglobin [Xenopus laevis], NA	P14923	JUP	CTNNG DP3	Catenin (Cadherin-associated protein), beta 1, 88kDa	0.07230737972109798	0.46835882211374746	FALSE	FALSE	FALSE
ENOG411CRR4	1	3	2	12	0.3070070547330004	1.756075445036376	0.12825380527194893	1.1482553719250892	2	7	1.45881962573422	ENOG411CRR4	122063392, 148232571, 169642455, 27370936, Xelaev18019533m.g, Xelaev18001027m.g	GenBank, Xenbase_9.1	srrt.L, srrt.S	LOC100037061 protein [Xenopus laevis], serrate RNA effector molecule homolog B [Xenopus laevis], LOC398542 protein [Xenopus laevis], NA	Q9BXP5	SRRT	ARS2 ASR2	serrate RNA effector molecule homolog (Arabidopsis)	0.07230737972109798	0.46835882211374746	FALSE	FALSE	FALSE
ENOG411CT0N	6	7	11	19	0.5501509965721715	1.5036627089054027	0.32089888321434484	0.7697437486713592	6.5	15	1.4522655984370632	ENOG411CT0N	148223631, 148226234, Xelaev18022223m.g	GenBank, Xenbase_9.1	otub1.L	uncharacterized protein LOC734802 [Xenopus laevis], OTU domain, ubiquitin aldehyde binding 1 [Xenopus laevis], NA	Q96FW1	OTUB1	OTB1 OTU1	OTU domain, ubiquitin aldehyde binding 1	0.07321388451204267	0.46835882211374746	FALSE	FALSE	FALSE
ENOG411CWR3	1	5	4	12	1.0630801652182171	0.980783978698198	0.8652193994381551	0.5632928712039329	3	8	1.4452301959873346	ENOG411CWR3	147900289, 171847308, Xelaev18015161m.g, Xelaev18012475m.g, Xelaev18027302m.g	GenBank, Xenbase_9.1	hnrnpr.S, hnrnpr.L, syncrip.L	synaptotagmin binding, cytoplasmic RNA interacting protein [Xenopus laevis], LOC100158425 protein [Xenopus laevis], NA	O60506, O43390, H0YAA0	SYNCRIP, HNRNPR, NA	HNRPQ NSAP1, HNRPR, NA	synaptotagmin binding, cytoplasmic RNA interacting protein	0.07419661869836652	0.46835882211374746	FALSE	FALSE	FALSE
ENOG411CXN4	0	0	0	5	0	2.0379023504666143	0	2.032778154505153	0	2.5	1.441014571410947	ENOG411CXN4	124481902, 148223718, Xelaev18002461m.g, Xelaev18019794m.g	GenBank, Xenbase_9.1	agk.L, agk.S	MGC52920 protein [Xenopus laevis], acylglycerol kinase, mitochondrial precursor [Xenopus laevis], NA	Q53H12	AGK	MULK	acylglycerol kinase	0.0747902831124047	0.46835882211374746	FALSE	FALSE	FALSE
ENOG411CTMB	0	0	0	5	0	2.0379023504666143	0	2.032778154505153	0	2.5	1.441014571410947	ENOG411CTMB	148223217, Xelaev18044872m.g	GenBank, Xenbase_9.1	nme9.L	thioredoxin domain containing 6 [Xenopus laevis], NA	Q8N427	NME8	SPTRX2 TXNDC3	NME NM23 family member	0.0747902831124047	0.46835882211374746	FALSE	FALSE	FALSE
ENOG411DGKE	0	0	0	5	0	2.0379023504666143	0	2.032778154505153	0	2.5	1.441014571410947	ENOG411DGKE	134024837, Xelaev18006062m.g	GenBank, Xenbase_9.1	hnrnpm.L	LOC100049142 protein [Xenopus laevis], NA	NA	NA	NA	Heterogeneous nuclear ribonucleoprotein M	0.0747902831124047	0.46835882211374746	FALSE	FALSE	FALSE
ENOG411DGFM	0	0	0	5	0	2.0379023504666143	0	2.032778154505153	0	2.5	1.441014571410947	ENOG411DGFM	148234561, 285026463, 52138970, 6172234, 6172236, 63146277, Xelaev18046188m.g, Xelaev18043463m.g	GenBank, Xenbase_9.1	sall4.S, sall4.L	sal-like 4 [Xenopus laevis], zinc finger transcription factor SALL4 b [Xenopus laevis], SALL4 protein [Xenopus laevis], Xsal-3 short form [Xenopus laevis], Xsal-3' long form [Xenopus laevis], Unknown (protein for MGC:115268) [Xenopus laevis], NA	NA	NA	NA	sal-like 4 (Drosophila)	0.0747902831124047	0.46835882211374746	FALSE	FALSE	FALSE
ENOG411CTKS	0	0	0	5	0	2.0379023504666143	0	2.032778154505153	0	2.5	1.441014571410947	ENOG411CTKS	147906877, Xelaev18035354m.g, Xelaev18037432m.g	GenBank, Xenbase_9.1	foxred1.L, foxred1.S	FAD-dependent oxidoreductase domain-containing protein 1 [Xenopus laevis], NA	Q96CU9	FOXRED1	NA	FAD-dependent oxidoreductase domain containing 1	0.0747902831124047	0.46835882211374746	FALSE	FALSE	FALSE
ENOG411DFW2	0	0	0	5	0	2.0379023504666143	0	2.032778154505153	0	2.5	1.441014571410947	ENOG411DFW2	Xelaev18011265m.g	Xenbase_9.1	loc100497083.L	NA	Q96MT7	CFAP44	WDR52	WD repeat domain 52	0.0747902831124047	0.46835882211374746	FALSE	FALSE	FALSE
ENOG411CX30	0	0	0	5	0	2.0379023504666143	0	2.032778154505153	0	2.5	1.441014571410947	ENOG411CX30	147901546, Xelaev18038261m.g	GenBank, Xenbase_9.1	nelfb.L	cofactor of BRCA1 [Xenopus laevis], NA	Q8WX92	NELFB	COBRA1 KIAA1182	cofactor of BRCA1	0.0747902831124047	0.46835882211374746	FALSE	FALSE	FALSE
ENOG411CT3X	0	0	0	5	0	2.0379023504666143	0	2.032778154505153	0	2.5	1.441014571410947	ENOG411CT3X	Xelaev18010385m.g, Xelaev18007449m.g	Xenbase_9.1	plbd2.S, plbd2.L	NA	Q8NHP8	PLBD2	NA	phospholipase B domain containing 2	0.0747902831124047	0.46835882211374746	FALSE	FALSE	FALSE
ENOG411CUY7	0	0	0	5	0	2.0379023504666143	0	2.032778154505153	0	2.5	1.441014571410947	ENOG411CUY7	148232636, Xelaev18047528m.g, Xelaev18045208m.g	GenBank, Xenbase_9.1	smg1.S, smg1.L	smg-1 homolog, phosphatidylinositol 3-kinase-related kinase [Xenopus laevis], NA	Q96Q15	SMG1	ATX KIAA0421 LIP	SMG1 homolog, phosphatidylinositol 3-kinase-related kinase (C. elegans)	0.0747902831124047	0.46835882211374746	FALSE	FALSE	FALSE
ENOG411CV66	0	0	0	5	0	2.0379023504666143	0	2.032778154505153	0	2.5	1.441014571410947	ENOG411CV66	148222997, Xelaev18043727m.g	GenBank, Xenbase_9.1	rptor.L	regulatory associated protein of MTOR, complex 1 [Xenopus laevis], NA	Q8N122	RPTOR	KIAA1303 RAPTOR	regulatory associated protein of MTOR, complex 1	0.0747902831124047	0.46835882211374746	FALSE	FALSE	FALSE
ENOG411CRC9	0	0	0	5	0	2.0379023504666143	0	2.032778154505153	0	2.5	1.441014571410947	ENOG411CRC9	147904140, 148744502, Xelaev18005761m.g, Xelaev18009452m.g	GenBank, Xenbase_9.1	pdlim5.L, pdlim5.S	MGC85532 protein [Xenopus laevis], LOC100101292 protein [Xenopus laevis], NA	Q96HC4	PDLIM5	ENH	PDZ and LIM domain 5	0.0747902831124047	0.46835882211374746	FALSE	FALSE	FALSE
ENOG411CQ28	0	0	0	5	0	2.0379023504666143	0	2.032778154505153	0	2.5	1.441014571410947	ENOG411CQ28	148234551	GenBank	NA	adenylyltransferase and sulfurtransferase MOCS3 [Xenopus laevis]	O95396	MOCS3	UBA4	molybdenum cofactor synthesis 3	0.0747902831124047	0.46835882211374746	FALSE	FALSE	FALSE
ENOG411CV7C	0	0	0	5	0	2.0379023504666143	0	2.032778154505153	0	2.5	1.441014571410947	ENOG411CV7C	Xelaev18015426m.g, Xelaev18012849m.g	Xenbase_9.1	nf1.S, nf1.L	NA	P21359	NF1	NA	Neurofibromin 1	0.0747902831124047	0.46835882211374746	FALSE	FALSE	FALSE
ENOG411CRVR	0	0	0	5	0	2.0379023504666143	0	2.032778154505153	0	2.5	1.441014571410947	ENOG411CRVR	147905468, Xelaev18030071m.g	GenBank, Xenbase_9.1	cpsf3.S	cleavage and polyadenylation specific factor 3, 73kDa [Xenopus laevis], NA	Q9UKF6	CPSF3	CPSF73	cleavage and polyadenylation specific factor 3, 73kDa	0.0747902831124047	0.46835882211374746	FALSE	FALSE	FALSE
ENOG411CY4Q	8	15	17	30	1.035668854835789	0.9934604122455325	0.543291304550793	0.4020119641708722	11.5	23.5	1.4348110646572916	ENOG411CY4Q	Xelaev18044172m.g, Xelaev18046790m.g	Xenbase_9.1	tbcd.L, tbcd.S	NA	Q9BTW9	TBCD	KIAA0988 SSD1 TFCD	tubulin folding cofactor D	0.07567047202610022	0.4727636499948411	FALSE	FALSE	FALSE
ENOG411CRJ5	7	2	10	11	0.007682108461226035	2.015892331849103	0.0027229231880897802	1.447815653783997	4.5	10.5	1.430883208979206	ENOG411CRJ5	123904542, 123908012, 147742927, 284520926, 55250671, 56199607, 56199609, Xelaev18013718m.g, Xelaev18009003m.g, Xelaev18016172m.g, Xelaev18005223m.g	GenBank, Xenbase_9.1	pds5b.L, pds5a.S, pds5b.S, pds5a.L	RecName: Full=Sister chromatid cohesion protein PDS5 homolog A-B, RecName: Full=Sister chromatid cohesion protein PDS5 homolog B-A; AltName: Full=Androgen-induced proliferation inhibitor A, RecName: Full=Sister chromatid cohesion protein PDS5 homolog B-B; AltName: Full=Androgen-induced proliferation inhibitor B, sister chromatid cohesion protein PDS5 homolog B-B [Xenopus laevis], Pds5b-b protein …	Q9NTI5, Q29RF7	PDS5B, PDS5A	APRIN AS3 KIAA0979, KIAA0648 PDS5	PDS5, regulator of cohesion maintenance, homolog	0.07623184505037169	0.47516073115313257	FALSE	FALSE	FALSE
ENOG411DFGV	1	0	3	2	0.7272110266705417	1.2888515295454006	0.5432913045507926	1.032778154505153	0.5	2.5	1.425571504796578	ENOG411DFGV	148231187, Xelaev18015123m.g, Xelaev18012051m.g	GenBank, Xenbase_9.1	eya3.S, eya3.L	eyes absent homolog 3 [Xenopus laevis], NA	NA	NA	NA	eyes absent homolog 3 (Drosophila)	0.07699603317770905	0.4771896941518563	FALSE	FALSE	FALSE
ENOG411DFBB	1	0	3	2	0.7272110266705417	1.2888515295454006	0.5432913045507926	1.032778154505153	0.5	2.5	1.425571504796578	ENOG411DFBB	Xelaev18003636m.g, Xelaev18044082m.g, Xelaev18003892m.g	Xenbase_9.1	None	NA	NA	NA	NA	envoplakin	0.07699603317770905	0.4771896941518563	FALSE	FALSE	FALSE
ENOG411CPN1	8	17	18	32	1.1965795992079393	0.8185365281860879	0.6212938165520658	0.32228477170013786	12.5	25	1.4249022785586913	ENOG411CPN1	148236241, Xelaev18009395m.g, Xelaev18005697m.g	GenBank, Xenbase_9.1	aimp1.S, aimp1.L	aminoacyl tRNA synthetase complex-interacting multifunctional protein 1 [Xenopus laevis], NA	Q12904	AIMP1	EMAP2 SCYE1	Aminoacyl tRNA synthetase complex-interacting multifunctional protein 1	0.07709272545759234	0.4771896941518563	FALSE	FALSE	FALSE
ENOG411CSK3	12	19	29	31	1.7179792104646108	0.29131071697826333	0.7497421820182191	0.1258875588966346	15.5	30	1.4207825330646822	ENOG411CSK3	148227184, 148232561, 27924357, Xelaev18029563m.g, Xelaev18012237m.g, Xelaev18027436m.g, Xelaev18027437m.g	GenBank, Xenbase_9.1	Xelaev18029563m.g, rnpep.L, Xelaev18027436m.g, rnpepl1.L	arginyl aminopeptidase (aminopeptidase B) [Xenopus laevis], LOC398435 protein [Xenopus laevis], NA	Q9HAU8, Q9H4A4	RNPEPL1, RNPEP	NA, APB	arginyl aminopeptidase (aminopeptidase	0.07768999505746615	0.47977608956966394	FALSE	FALSE	FALSE
ENOG411D145	0	2	2	5	1.3048031678308571	0.6802222002387145	1.1282538052719489	0.447815653783997	1	3.5	1.4036248985893163	ENOG411D145	Xelaev18026910m.g	Xenbase_9.1	tarbp1.L	NA	Q13395	TARBP1	TRM3 TRP185	Tar (HIV-1) RNA binding protein 1	0.08021528839385733	0.49130380899107207	FALSE	FALSE	FALSE
ENOG411CYKW	0	1	2	3	1.3048031678308571	0.6777564202914759	1.1282538052719489	0.447815653783997	0.5	2.5	1.4018813288677103	ENOG411CYKW	Xelaev18042044m.g, Xelaev18042043m.g, Xelaev18038762m.g	Xenbase_9.1	Xelaev18042044m.g, abcb7.S, abcb7.L	NA	O75027	ABCB7	ABC7	ATP-binding cassette, sub-family B (MDR TAP), member 7	0.08047534343234464	0.49130380899107207	FALSE	FALSE	FALSE
ENOG411CZ9T	0	1	2	3	1.3048031678308571	0.6777564202914759	1.1282538052719489	0.447815653783997	0.5	2.5	1.4018813288677103	ENOG411CZ9T	Xelaev18011284m.g, Xelaev18014432m.g	Xenbase_9.1	fam162a.L, fam162a.S	NA	Q96A26	FAM162A	C3orf28 E2IG5	Family with sequence similarity 162, member	0.08047534343234464	0.49130380899107207	FALSE	FALSE	FALSE
ENOG411CUMD	0	1	2	3	1.3048031678308571	0.6777564202914759	1.1282538052719489	0.447815653783997	0.5	2.5	1.4018813288677103	ENOG411CUMD	147903687, Xelaev18012112m.g	GenBank, Xenbase_9.1	lin28a.L	protein lin-28 homolog A [Xenopus laevis], NA	Q9H9Z2	LIN28A	CSDD1 LIN28 ZCCHC1	lin-28 homolog A (C. elegans)	0.08047534343234464	0.49130380899107207	FALSE	FALSE	FALSE
ENOG411D148	0	1	2	3	1.3048031678308571	0.6777564202914759	1.1282538052719489	0.447815653783997	0.5	2.5	1.4018813288677103	ENOG411D148	148235046, Xelaev18023596m.g, Xelaev18025604m.g	GenBank, Xenbase_9.1	kifap3.L, kifap3.S	kinesin-associated protein 3 [Xenopus laevis], NA	Q92845	KIFAP3	KIF3AP SMAP	kinesin-associated protein 3	0.08047534343234464	0.49130380899107207	FALSE	FALSE	FALSE
ENOG411CSDI	0	1	0	8	0	1.970867357354635	0	1.6177406552263094	0.5	4	1.3936136732046729	ENOG411CSDI	114108185, Xelaev18024592m.g, Xelaev18021750m.g	GenBank, Xenbase_9.1	prmt3.S, prmt3.L	MGC154481 protein [Xenopus laevis], NA	O60678	PRMT3	HRMT1L3	Protein arginine methyltransferase 3	0.08171714864633357	0.49661739881885447	FALSE	FALSE	FALSE
ENOG411CWFZ	0	1	0	8	0	1.970867357354635	0	1.6177406552263094	0.5	4	1.3936136732046729	ENOG411CWFZ	148225695, Xelaev18018789m.g	GenBank, Xenbase_9.1	ap3m2.L	adaptor-related protein complex 3, mu 2 subunit [Xenopus laevis], NA	Q9Y2T2, P53677	AP3M1, AP3M2	NA	adaptor-related protein complex 3, mu	0.08171714864633357	0.49661739881885447	FALSE	FALSE	FALSE
ENOG411CZFR	12	14	15	40	-0.37017743490946353	2.3353624452966644	-0.15714841359029952	0.8984770627935621	13	27.5	1.3895956471309454	ENOG411CZFR	Xelaev18038546m.g	Xenbase_9.1	aifm1.L	NA	O95831	AIFM1	AIF PDCD8	Apoptosis-inducing factor, mitochondrion-associated, 1	0.08232584915203825	0.49918213295362873	FALSE	FALSE	FALSE
ENOG411CVJC	0	2	3	4	1.5980745634395823	0.3626466885734892	1.5432913045507926	0.184781247950203	1	3.5	1.3864392933150202	ENOG411CVJC	Xelaev18012735m.g, Xelaev18015349m.g	Xenbase_9.1	vps53.L, vps53.S	NA	Q5VIR6	VPS53	NA	vacuolar protein sorting 53 homolog (S. cerevisiae)	0.08280640256683662	0.5009600010491428	FALSE	FALSE	FALSE
ENOG411CYCR	46	71	72	129	0.5539858156071868	1.39423073414904	0.17852701175317265	0.3002584653701391	58.5	100.5	1.3775971335524868	ENOG411CYCR	147899563, Xelaev18047373m.g	GenBank, Xenbase_9.1	ndufs1.S	NADH dehydrogenase (ubiquinone) Fe-S protein 1, 75kDa (NADH-coenzyme Q reductase) [Xenopus laevis], NA	P28331	NDUFS1	NA	NADH dehydrogenase (ubiquinone) Fe-S protein 1, 75kDa (NADH-coenzyme Q reductase)	0.08416385322402174	0.5080228973386776	FALSE	FALSE	FALSE
ENOG411CQFB	6	5	9	17	0.10912502178560989	1.8338565515943346	0.057864477380551005	1.032778154505153	5.5	13	1.3738954462574662	ENOG411CQFB	147899475, 148232824, 30353795, 64970, Xelaev18031658m.g	GenBank, Xenbase_9.1	loc100490872.L	polyadenylate-binding protein 1-B [Xenopus laevis], polyadenylate-binding protein 1-A [Xenopus laevis], Pabpc1 protein [Xenopus laevis], polyA binding protein [Xenopus laevis], NA	P11940, Q9H361	PABPC1, PABPC3	PAB1 PABP1 PABPC2, PABP3 PABPL3	poly(A) binding protein, cytoplasmic	0.08473707178097015	0.5089575385793613	FALSE	FALSE	FALSE
ENOG411CSJF	0	1	1	4	0.9226215573892205	1.0137891149830645	0.5432913045507926	0.7697437486713592	0.5	2.5	1.3692491175964445	ENOG411CSJF	147905137, Xelaev18032848m.g, Xelaev18030705m.g	GenBank, Xenbase_9.1	idi1.S, idi1.L	isopentenyl-diphosphate delta isomerase 1 [Xenopus laevis], NA	Q13907	IDI1	NA	Isopentenyl-diphosphate delta isomerase	0.0854607086096235	0.5089575385793613	FALSE	FALSE	FALSE
ENOG411CVJE	0	1	1	4	0.9226215573892205	1.0137891149830645	0.5432913045507926	0.7697437486713592	0.5	2.5	1.3692491175964445	ENOG411CVJE	114108129, 120577413, 171847160, Xelaev18009508m.g, Xelaev18005837m.g, Xelaev18021525m.g, Xelaev18017113m.g	GenBank, Xenbase_9.1	ankrd17.S, ankrd17.L, ankhd1.S, ankhd1.L	LOC779081 protein [Xenopus laevis], NA	Q8IWZ3, O75179	ANKHD1, ANKRD17	KIAA1085 MASK VBARP, GTAR KIAA0697	ankyrin repeat	0.0854607086096235	0.5089575385793613	FALSE	FALSE	FALSE
ENOG411CQNM	0	1	1	4	0.9226215573892205	1.0137891149830645	0.5432913045507926	0.7697437486713592	0.5	2.5	1.3692491175964445	ENOG411CQNM	148224776, Xelaev18026677m.g	GenBank, Xenbase_9.1	rdh13.L	retinol dehydrogenase 13 (all-trans/9-cis) [Xenopus laevis], NA	H0YJ10, Q8TC12, Q96NR8, Q8NBN7, H0YIZ8	NA, RDH11, RDH12, RDH13	NA, ARSDR1 PSDR1 SDR7C1, SDR7C2, SDR7C3	retinol dehydrogenase	0.0854607086096235	0.5089575385793613	FALSE	FALSE	FALSE
ENOG411CPG2	0	1	1	4	0.9226215573892205	1.0137891149830645	0.5432913045507926	0.7697437486713592	0.5	2.5	1.3692491175964445	ENOG411CPG2	116488000, 148744512, 161612011, 27469880, Xelaev18040867m.g, Xelaev18018105m.g, Xelaev18007942m.g, Xelaev18020596m.g, Xelaev18018258m.g	GenBank, Xenbase_9.1	slc27a3.L, loc100494612.L, slc27a6.L, slc27a2.S, slc27a2.L	MGC154930 protein [Xenopus laevis], LOC100101306 protein [Xenopus laevis], LOC398483 protein [Xenopus laevis], NA	Q9Y2P5, O14975, Q5K4L6	SLC27A5, SLC27A2, SLC27A3	ACSB ACSVL6 FACVL3 FATP5, ACSVL1 FACVL1 FATP2 VLACS, ACSVL3 FATP3	Solute carrier family 27 (Fatty acid transporter), member	0.0854607086096235	0.5089575385793613	FALSE	FALSE	FALSE
ENOG411D12F	0	1	1	4	0.9226215573892205	1.0137891149830645	0.5432913045507926	0.7697437486713592	0.5	2.5	1.3692491175964445	ENOG411D12F	116487825, 13603484, 229621705, 66911602, 66911607, Xelaev18006108m.g	GenBank, Xenbase_9.1	chaf1a.L	LOC733264 protein [Xenopus laevis], chromatin assembly factor 1 p150 subunit [Xenopus laevis], RecName: Full=Chromatin assembly factor 1 subunit A-B; Short=CAF-1 subunit A; AltName: Full=Chromatin assembly factor I p150 subunit B; Short=CAF-I 150 kDa subunit B; Short=CAF-I p150-B; Short=xp150, Unknown (protein for MGC:115625) [Xenopus laevis], NA	Q13111	CHAF1A	CAF CAF1P150	Chromatin assembly factor 1, subunit A (P150)	0.0854607086096235	0.5089575385793613	FALSE	FALSE	FALSE
ENOG411CR51	0	6	2	12	1.3048031678308571	0.6281830989139404	1.1282538052719489	0.340900449867485	3	7	1.3668276971557147	ENOG411CR51	56789608, Xelaev18038342m.g	GenBank, Xenbase_9.1	psmd5.L	LOC496243 protein [Xenopus laevis], NA	Q16401	PSMD5	KIAA0072	proteasome (prosome, macropain) 26S subunit, non-ATPase, 5	0.08583965954690571	0.510078332507613	FALSE	FALSE	FALSE
ENOG411CWXH	2	6	5	15	0.7507393534712237	1.1783120496360815	0.5432913045507928	0.6404607317263928	4	10	1.3640453283945997	ENOG411CWXH	148233274, Xelaev18019685m.g, Xelaev18016577m.g	GenBank, Xenbase_9.1	strap.S, strap.L	serine/threonine kinase receptor associated protein [Xenopus laevis], NA	NA	NA	NA	serine threonine kinase receptor associated protein	0.08627664994679488	0.5115382748508415	FALSE	FALSE	FALSE
ENOG411CPYI	2	5	5	13	0.7507393534712237	1.1679945888701622	0.5432913045507928	0.6702080751204449	3.5	9	1.356749781922392	ENOG411CPYI	148225959, 148232696	GenBank	NA	uncharacterized protein LOC432221 [Xenopus laevis], Vps20-associated 1 homolog [Xenopus laevis]	Q9NP79	VTA1	C6orf55	Vps20-associated 1 homolog (S. cerevisiae)	0.08743036439125837	0.5172318459783737	FALSE	FALSE	FALSE
ENOG411CW9M	0	5	1	12	0.9226215573892205	0.980783978698198	0.5432913045507926	0.5632928712039329	2.5	6.5	1.3459109619154292	ENOG411CW9M	126631797, 51704122, Xelaev18012989m.g, Xelaev18015540m.g	GenBank, Xenbase_9.1	eif5b.L, eif5b-like.S	LOC446935 protein [Xenopus laevis], NA	O60841	EIF5B	IF2 KIAA0741	Eukaryotic translation initiation factor 5B	0.08916561658262176	0.5258578184180631	FALSE	FALSE	FALSE
ENOG411CQJB	1	4	3	11	0.7272110266705417	1.164755850329719	0.5432913045507926	0.7108500596177907	2.5	7	1.3378226085072191	ENOG411CQJB	111185521, 148229164, 148237380, Xelaev18016095m.g	GenBank, Xenbase_9.1	Xelaev18016095m.g	Gpd1 protein [Xenopus laevis], MGC83663 protein [Xenopus laevis], glycerol-3-phosphate dehydrogenase 1-like protein [Xenopus laevis], NA	Q8N335, P21695	GPD1L, GPD1	KIAA0089, NA	Glycerol-3-phosphate dehydrogenase	0.09047713503600313	0.5258578184180631	FALSE	FALSE	FALSE
ENOG411CR6C	1	0	2	3	0.3070070547330004	1.5785269911948188	0.12825380527194893	1.447815653783997	0.5	2.5	1.333273910033668	ENOG411CR6C	1169854, 148227192, 148236687, 148237737, 160333650, 283837890, Xelaev18010134m.g, Xelaev18010132m.g	GenBank, Xenbase_9.1	gnaq.S, gna14.S	RecName: Full=Guanine nucleotide-binding protein subunit alpha-11; Short=G alpha-11; Short=G-protein subunit alpha-11, guanine nucleotide binding protein (G protein), alpha 11 (Gq class) [Xenopus laevis], guanine nucleotide binding protein (G protein), q polypeptide [Xenopus laevis], guanine nucleotide binding protein (G protein), alpha 14 [Xenopus laevis], guanine nucleotide-binding protein G(q)…	P50148, P29992, O95837	GNAQ, GNA11, GNA14	GAQ, GA11, NA	Guanine nucleotide binding protein (G protein)	0.09122096613178172	0.5258578184180631	FALSE	FALSE	FALSE
ENOG411CVCM	0	2	1	6	0.9226215573892205	0.9585231467018402	0.5432913045507926	0.6702080751204449	1	3.5	1.3301701766559502	ENOG411CVCM	147903004, Xelaev18003640m.g	GenBank, Xenbase_9.1	ipo11.S	importin 11 [Xenopus laevis], NA	Q9UI26	IPO11	RANBP11	importin 11	0.09173110396894606	0.5258578184180631	FALSE	FALSE	FALSE
ENOG411CPQY	1	1	2	6	0.3070070547330004	1.5457697762129996	0.12825380527194893	1.2551705758416012	1	4	1.310111061187238	ENOG411CPQY	114107883, 147903227	GenBank	NA	Rcn1 protein [Xenopus laevis], uncharacterized protein LOC496147 precursor [Xenopus laevis]	Q15293, E9PP27	RCN1, NA	RCN, NA	Reticulocalbin 1, EF-hand calcium binding domain	0.09507913352169105	0.5258578184180631	FALSE	FALSE	FALSE
ENOG411CX60	1	1	2	6	0.3070070547330004	1.5457697762129996	0.12825380527194893	1.2551705758416012	1	4	1.310111061187238	ENOG411CX60	147901790, Xelaev18038579m.g	GenBank, Xenbase_9.1	naa10.L	alpha-N-acetyltransferase 1A [Xenopus laevis], NA	P41227, Q9BSU3	NAA10, NAA11	ARD1 ARD1A TE2, ARD1B ARD2	NatA catalytic subunit	0.09507913352169105	0.5258578184180631	FALSE	FALSE	FALSE
ENOG411CUUS	1	1	6	2	1.5959913177930014	0.2564237478929571	1.3506462266083967	0.032778154505153104	1	4	1.309855254518665	ENOG411CUUS	118403006, 148237970	GenBank	NA	chromatin assembly factor 1 [Xenopus laevis], chromatin assembly factor-1 p60 subunit [Xenopus laevis]	Q13112	CHAF1B	CAF1A CAF1P60 MPHOSPH7 MPP7	Chromatin assembly factor 1, subunit B (P60)	0.09512240334583631	0.5258578184180631	FALSE	FALSE	FALSE
ENOG411CYW0	1	5	1	19	-0.2764018151375699	2.1279374256161048	-0.45670869544920745	1.1847812479502031	3	10	1.309233385777746	ENOG411CYW0	148222204, 47718059, Xelaev18020612m.g, Xelaev18018234m.g	GenBank, Xenbase_9.1	cops2.S, cops2.L	COP9 signalosome complex subunit 2 [Xenopus laevis], LOC432342 protein [Xenopus laevis], NA	P61201	COPS2	CSN2 TRIP15	COP9 constitutive photomorphogenic homolog subunit 2 (Arabidopsis)	0.09522765322853995	0.5258578184180631	FALSE	FALSE	FALSE
ENOG411CV19	0	0	4	0	1.8453247825788208	0	1.8652193994381552	0	0	2	1.3048416672530756	ENOG411CV19	Xelaev18028974m.g, Xelaev18026723m.g	Xenbase_9.1	birc6.S, birc6.L	NA	Q9NR09	BIRC6	KIAA1289	baculoviral IAP repeat containing 6	0.09597338380777493	0.5258578184180631	FALSE	FALSE	FALSE
ENOG411CQ96	0	0	4	0	1.8453247825788208	0	1.8652193994381552	0	0	2	1.3048416672530756	ENOG411CQ96	Xelaev18017614m.g, Xelaev18021107m.g	Xenbase_9.1	pnpla8.L, pnpla8.S	NA	Q9NP80	PNPLA8	IPLA22 IPLA2G	patatin-like phospholipase domain containing 8	0.09597338380777493	0.5258578184180631	FALSE	FALSE	FALSE
ENOG411CWAB	14	23	22	49	0.3182604402885051	1.5269351388534746	0.15996266499928707	0.5067093428375654	18.5	35.5	1.3047503066267325	ENOG411CWAB	147899657, Xelaev18024671m.g	GenBank, Xenbase_9.1	cars.S	cysteinyl-tRNA synthetase, cytoplasmic [Xenopus laevis], NA	P49589	CARS	NA	Cysteinyl-tRNA synthetase	0.0959889426605189	0.5258578184180631	FALSE	FALSE	FALSE
ENOG411CV7X	2	0	2	6	-0.39090272923773745	2.232428122919567	-0.4567086954492073	2.255170575841601	1	4	1.3021550935996482	ENOG411CV7X	147902192, Xelaev18031714m.g, Xelaev18033499m.g	GenBank, Xenbase_9.1	cdkal1.L, cdkal1.S	CDK5 regulatory subunit-associated protein 1-like 1 [Xenopus laevis], NA	Q5VV42	CDKAL1	NA	CDK5 regulatory subunit associated protein 1-like 1	0.09643168637314448	0.5258578184180631	FALSE	FALSE	FALSE
ENOG411CUHJ	0	0	1	1	0.9226215573892205	0.911348329855701	0.5432913045507926	0.447815653783997	0	1	1.2968125437628117	ENOG411CUHJ	147901409, 147906198, Xelaev18044586m.g	GenBank, Xenbase_9.1	gpd2.L	uncharacterized protein LOC495948 [Xenopus laevis], glycerol-3-phosphate dehydrogenase 2 (mitochondrial) [Xenopus laevis], NA	P43304	GPD2	NA	glycerol-3-phosphate dehydrogenase 2 (mitochondrial)	0.09734784681465175	0.5258578184180631	FALSE	FALSE	FALSE
ENOG411CWDX	0	0	1	1	0.9226215573892205	0.911348329855701	0.5432913045507926	0.447815653783997	0	1	1.2968125437628117	ENOG411CWDX	147901458, 160420273, 160707943, 213623594, 992624, Xelaev18042806m.g, Xelaev18018255m.g, Xelaev18001265m.g	GenBank, Xenbase_9.1	gabpb2.S, gabpb1.L, Xelaev18001265m.g	GA binding protein transcription factor, beta subunit 2 [Xenopus laevis], GA binding protein transcription factor, beta subunit 1 [Xenopus laevis], XrpFIbeta1 [Xenopus laevis], NA	Q8TAK5, Q06547	GABPB2, GABPB1	NA, E4TF1B GABPB GABPB2	GA binding protein transcription factor beta subunit	0.09734784681465175	0.5258578184180631	FALSE	FALSE	FALSE
ENOG411CTSP	0	0	1	1	0.9226215573892205	0.911348329855701	0.5432913045507926	0.447815653783997	0	1	1.2968125437628117	ENOG411CTSP	148226384, 166201906, Xelaev18018445m.g	GenBank, Xenbase_9.1	dis3l.L	DIS3-like exonuclease 1 [Xenopus laevis], RecName: Full=DIS3-like exonuclease 1, NA	Q8TF46	DIS3L	DIS3L1 KIAA1955	DIS3 mitotic control homolog (S. cerevisiae)-like	0.09734784681465175	0.5258578184180631	FALSE	FALSE	FALSE
ENOG411CTX7	0	0	1	1	0.9226215573892205	0.911348329855701	0.5432913045507926	0.447815653783997	0	1	1.2968125437628117	ENOG411CTX7	124302110, 164454206, Xelaev18007946m.g, Xelaev18022526m.g, Xelaev18018227m.g, Xelaev18010728m.g	GenBank, Xenbase_9.1	slc12a2.L, slc12a3.L, slc12a1.L, slc12a2.S	Na-K-2Cl cotransporter 1 [Xenopus laevis], bumetanide-sensitive Na-K-Cl cotransport protein [Xenopus laevis], NA	P55011, Q13621, P55017	SLC12A2, SLC12A1, SLC12A3	NKCC1, NKCC2, NCC TSC	Solute carrier family 12 (Sodium potassium chloride transporters), member	0.09734784681465175	0.5258578184180631	FALSE	FALSE	FALSE
ENOG411CVUD	0	0	1	1	0.9226215573892205	0.911348329855701	0.5432913045507926	0.447815653783997	0	1	1.2968125437628117	ENOG411CVUD	147898560, 148225508, 3283070, 50414726, Xelaev18022848m.g, Xelaev18024984m.g	GenBank, Xenbase_9.1	katnb1.L, katnb1.S	katanin p80 WD40-containing subunit B1 [Xenopus laevis], katanin p80 (WD40-containing) subunit B 1 [Xenopus laevis], p80 katanin [Xenopus laevis], Unknown (protein for IMAGE:4031030) [Xenopus laevis], NA	Q9BVA0	KATNB1	NA	Katanin p80 (WD repeat containing) subunit B 1	0.09734784681465175	0.5258578184180631	FALSE	FALSE	FALSE
ENOG411CTHY	0	0	1	1	0.9226215573892205	0.911348329855701	0.5432913045507926	0.447815653783997	0	1	1.2968125437628117	ENOG411CTHY	Xelaev18011244m.g	Xenbase_9.1	maats1.L	NA	Q7Z4T9	MAATS1	AAT1 C3orf15 CFAP91	MYCBP AMY-1-associated, testis expressed 1	0.09734784681465175	0.5258578184180631	FALSE	FALSE	FALSE
ENOG411CY88	0	0	1	1	0.9226215573892205	0.911348329855701	0.5432913045507926	0.447815653783997	0	1	1.2968125437628117	ENOG411CY88	Xelaev18008161m.g	Xenbase_9.1	gfm2.L	NA	Q969S9	GFM2	EFG2	G elongation factor, mitochondrial 2	0.09734784681465175	0.5258578184180631	FALSE	FALSE	FALSE
ENOG411DEHE	0	0	1	1	0.9226215573892205	0.911348329855701	0.5432913045507926	0.447815653783997	0	1	1.2968125437628117	ENOG411DEHE	148225965, 148922112, 509565, Xelaev18028545m.g, Xelaev18026427m.g	GenBank, Xenbase_9.1	ptk7.S, ptk7.L	PTK7 protein tyrosine kinase 7 precursor [Xenopus laevis], LOC100101336 protein [Xenopus laevis], putative protein-tyrosine kinase [Xenopus laevis], NA	NA	NA	NA	PTK7 protein tyrosine kinase 7	0.09734784681465175	0.5258578184180631	FALSE	FALSE	FALSE
ENOG411CXMP	0	0	1	1	0.9226215573892205	0.911348329855701	0.5432913045507926	0.447815653783997	0	1	1.2968125437628117	ENOG411CXMP	148230204, 190360172, Xelaev18010942m.g	GenBank, Xenbase_9.1	trappc13-like.S	chromosome 5 open reading frame 44 [Xenopus laevis], RecName: Full=UPF0533 protein C5orf44 homolog, NA	A5PLN9	TRAPPC13	C5orf44	chromosome 5 open reading frame 44	0.09734784681465175	0.5258578184180631	FALSE	FALSE	FALSE
ENOG411CTKM	0	0	1	1	0.9226215573892205	0.911348329855701	0.5432913045507926	0.447815653783997	0	1	1.2968125437628117	ENOG411CTKM	Xelaev18006150m.g	Xenbase_9.1	ints10.L	NA	Q9NVR2	INTS10	C8orf35	integrator complex subunit 10	0.09734784681465175	0.5258578184180631	FALSE	FALSE	FALSE
ENOG411CPPX	0	0	1	1	0.9226215573892205	0.911348329855701	0.5432913045507926	0.447815653783997	0	1	1.2968125437628117	ENOG411CPPX	148234879, 18874025, 28302250, Xelaev18005935m.g, Xelaev18035144m.g, Xelaev18037215m.g	GenBank, Xenbase_9.1	mapk10.L, mapk8.L, mapk8.S	mitogen-activated protein kinase 8 [Xenopus laevis], c-Jun N-terminal kinase alpha [Xenopus laevis], LOC398499 protein [Xenopus laevis], NA	P53779, P45983, P45984	MAPK10, MAPK8, MAPK9	JNK3 JNK3A PRKM10 SAPK1B, JNK1 PRKM8 SAPK1 SAPK1C, JNK2 PRKM9 SAPK1A	mitogenactivated protein kinase	0.09734784681465175	0.5258578184180631	FALSE	FALSE	FALSE
ENOG411CUWY	0	0	1	1	0.9226215573892205	0.911348329855701	0.5432913045507926	0.447815653783997	0	1	1.2968125437628117	ENOG411CUWY	Xelaev18014151m.g, Xelaev18011706m.g	Xenbase_9.1	supt6h.S, supt6h.L	NA	Q7KZ85	SUPT6H	KIAA0162 SPT6H	suppressor of Ty 6 homolog (S. cerevisiae)	0.09734784681465175	0.5258578184180631	FALSE	FALSE	FALSE
ENOG411CYSJ	0	0	1	1	0.9226215573892205	0.911348329855701	0.5432913045507926	0.447815653783997	0	1	1.2968125437628117	ENOG411CYSJ	147904603, 147904944, Xelaev18046084m.g, Xelaev18043334m.g	GenBank, Xenbase_9.1	ddx42.S, ddx42.L	ATP-dependent RNA helicase DDX42 [Xenopus laevis], MGC84147 protein [Xenopus laevis], NA	Q86XP3	DDX42	NA	DEAD (Asp-Glu-Ala-Asp) box polypeptide 42	0.09734784681465175	0.5258578184180631	FALSE	FALSE	FALSE
ENOG411CUF0	0	0	1	1	0.9226215573892205	0.911348329855701	0.5432913045507926	0.447815653783997	0	1	1.2968125437628117	ENOG411CUF0	118763692, 157073885, 49115339, 49118262, Xelaev18028173m.g	GenBank, Xenbase_9.1	cdc5l.L	LOC443636 protein [Xenopus laevis], cell division cycle 5-like [Xenopus laevis], Cdc5l protein [Xenopus laevis], NA	Q99459	CDC5L	KIAA0432 PCDC5RP	CDC5 cell division cycle 5-like (S. pombe)	0.09734784681465175	0.5258578184180631	FALSE	FALSE	FALSE
ENOG411CUFH	0	0	1	1	0.9226215573892205	0.911348329855701	0.5432913045507926	0.447815653783997	0	1	1.2968125437628117	ENOG411CUFH	169642006, Xelaev18032029m.g	GenBank, Xenbase_9.1	loc100489788-like.L	LOC100158305 protein [Xenopus laevis], NA	NA	NA	NA	KISc	0.09734784681465175	0.5258578184180631	FALSE	FALSE	FALSE
ENOG411DGHA	0	0	1	1	0.9226215573892205	0.911348329855701	0.5432913045507926	0.447815653783997	0	1	1.2968125437628117	ENOG411DGHA	148236527, Xelaev18046434m.g	GenBank, Xenbase_9.1	dnai2.S	dynein, axonemal, intermediate chain 2 [Xenopus laevis], NA	NA	DNAI2	DNAI2	Dynein, axonemal, intermediate chain 2	0.09734784681465175	0.5258578184180631	FALSE	FALSE	FALSE
ENOG411D4ZH	0	0	1	1	0.9226215573892205	0.911348329855701	0.5432913045507926	0.447815653783997	0	1	1.2968125437628117	ENOG411D4ZH	124481707, Xelaev18021466m.g	GenBank, Xenbase_9.1	uqcrq.S	MGC130882 protein [Xenopus laevis], NA	O14949	UQCRQ	NA	Ubiquinol-cytochrome c reductase, complex III subunit VII	0.09734784681465175	0.5258578184180631	FALSE	FALSE	FALSE
ENOG411CTIH	0	0	1	1	0.9226215573892205	0.911348329855701	0.5432913045507926	0.447815653783997	0	1	1.2968125437628117	ENOG411CTIH	147898568	GenBank	NA	exosome component 3 [Xenopus laevis]	Q9NQT5	EXOSC3	RRP40	Exosome component 3	0.09734784681465175	0.5258578184180631	FALSE	FALSE	FALSE
ENOG411CZ1X	0	0	1	1	0.9226215573892205	0.911348329855701	0.5432913045507926	0.447815653783997	0	1	1.2968125437628117	ENOG411CZ1X	148227291, 27694625, Xelaev18025442m.g, Xelaev18023393m.g	GenBank, Xenbase_9.1	prrc2c.S, prrc2c.L	proline-rich coiled-coil 2C [Xenopus laevis], LOC398535 protein [Xenopus laevis], NA	Q9Y520	PRRC2C	BAT2D1 BAT2L2 KIAA1096 XTP2	proline-rich coiled-coil 2C	0.09734784681465175	0.5258578184180631	FALSE	FALSE	FALSE
ENOG411CWAM	0	0	0	4	0	1.822740620542688	0	1.7697437486713592	0	2	1.2888722531299102	ENOG411CWAM	147899149, 148227095, 27370915, 33417067, 55250531, Xelaev18031916m.g, Xelaev18033655m.g	GenBank, Xenbase_9.1	osbpl1a.L, osbpl1a.S	uncharacterized protein LOC398688 [Xenopus laevis], oxysterol binding protein-like 2 [Xenopus laevis], LOC398688 protein [Xenopus laevis], LOC495678 protein [Xenopus laevis], NA	Q9BXW6, Q9H1P3	OSBPL1A, OSBPL2	ORP1 OSBP8 OSBPL1 OSBPL1B, KIAA0772 ORP2	oxysterol binding protein-like	0.09872125087728785	0.5258578184180631	FALSE	FALSE	FALSE
ENOG411CQKX	0	0	0	4	0	1.822740620542688	0	1.7697437486713592	0	2	1.2888722531299102	ENOG411CQKX	49903415, 52354715, Xelaev18010623m.g, Xelaev18007805m.g	GenBank, Xenbase_9.1	clip1.S, clip1.L	LOC445831 protein [Xenopus laevis], LOC494731 protein [Xenopus laevis], NA	NA	NA	NA	CAP-GLY domain containing linker protein 1	0.09872125087728785	0.5258578184180631	FALSE	FALSE	FALSE
ENOG411CWQ5	0	0	0	4	0	1.822740620542688	0	1.7697437486713592	0	2	1.2888722531299102	ENOG411CWQ5	114107828, 147907086, 148229973, Xelaev18037740m.g, Xelaev18032220m.g, Xelaev18046001m.g, Xelaev18043241m.g	GenBank, Xenbase_9.1	Xelaev18037740m.g, stk3.L, stk4.S, stk4.L	Stk4 protein [Xenopus laevis], serine/threonine-protein kinase 3 [Xenopus laevis], serine/threonine-protein kinase 4 [Xenopus laevis], NA	Q13043, Q13188	STK4, STK3	KRS2 MST1, KRS1 MST2	serine threonine kinase	0.09872125087728785	0.5258578184180631	FALSE	FALSE	FALSE
ENOG411CR6A	0	0	0	4	0	1.822740620542688	0	1.7697437486713592	0	2	1.2888722531299102	ENOG411CR6A	Xelaev18046411m.g	Xenbase_9.1	cog1.S	NA	Q8WTW3, A0A087WVI0	COG1	KIAA1381 LDLB, NA	component of oligomeric golgi complex 1	0.09872125087728785	0.5258578184180631	FALSE	FALSE	FALSE
ENOG411CUEX	0	0	0	4	0	1.822740620542688	0	1.7697437486713592	0	2	1.2888722531299102	ENOG411CUEX	148233872	GenBank	NA	WD repeat-containing protein 92 [Xenopus laevis]	Q96MX6	WDR92	NA	WD repeat-containing protein	0.09872125087728785	0.5258578184180631	FALSE	FALSE	FALSE
ENOG411CREK	0	0	0	4	0	1.822740620542688	0	1.7697437486713592	0	2	1.2888722531299102	ENOG411CREK	147905510, 148228090, Xelaev18026220m.g, Xelaev18028682m.g	GenBank, Xenbase_9.1	smyd2.L, smyd2.S	N-lysine methyltransferase SMYD2-B [Xenopus laevis], N-lysine methyltransferase SMYD2-A [Xenopus laevis], NA	Q9NRG4	SMYD2	KMT3C	SET and MYND domain containing 2	0.09872125087728785	0.5258578184180631	FALSE	FALSE	FALSE
ENOG411CPRI	0	0	0	4	0	1.822740620542688	0	1.7697437486713592	0	2	1.2888722531299102	ENOG411CPRI	148223852, 148237854, 31074987, Xelaev18024014m.g, Xelaev18025918m.g	GenBank, Xenbase_9.1	nckipsd.L, nckipsd.S	NCK interacting protein with SH3 domain [Xenopus laevis], MGC81740 protein [Xenopus laevis], Figo [Xenopus laevis], NA	Q9NZQ3	NCKIPSD	AF3P21 SPIN90	NCK interacting protein with SH3 domain	0.09872125087728785	0.5258578184180631	FALSE	FALSE	FALSE
ENOG411CX8P	0	0	0	4	0	1.822740620542688	0	1.7697437486713592	0	2	1.2888722531299102	ENOG411CX8P	148223505, Xelaev18045558m.g, Xelaev18047790m.g	GenBank, Xenbase_9.1	flii.L, flii.S	flightless 1 homolog [Xenopus laevis], NA	Q13045	FLII	FLIL	flightless I homolog (Drosophila)	0.09872125087728785	0.5258578184180631	FALSE	FALSE	FALSE
ENOG411CP8H	0	0	0	4	0	1.822740620542688	0	1.7697437486713592	0	2	1.2888722531299102	ENOG411CP8H	Xelaev18028057m.g, Xelaev18031898m.g, Xelaev18033641m.g, Xelaev18003283m.g, Xelaev18030093m.g	Xenbase_9.1	greb1.L, Xelaev18031898m.g, Xelaev18033641m.g, Xelaev18003283m.g, greb1.S	NA	Q4ZG55, Q9C091	GREB1, GREB1L	KIAA0575, C18orf6 KIAA1772	growth regulation by estrogen in breast	0.09872125087728785	0.5258578184180631	FALSE	FALSE	FALSE
ENOG411DF7C	0	0	0	4	0	1.822740620542688	0	1.7697437486713592	0	2	1.2888722531299102	ENOG411DF7C	1314316, 148233756, 148238333, 49899781, 56970890, Xelaev18039584m.g, Xelaev18016429m.g, Xelaev18041285m.g	GenBank, Xenbase_9.1	thul16.L, loc100488585.S, thul16.S	WD-40 motifs; up-regulated by thyroid hormone in tadpoles [Xenopus laevis], uncharacterized protein LOC431969 [Xenopus laevis], thyroid hormone up-regulated protein (gene 16) [Xenopus laevis], Unknown (protein for MGC:84628) [Xenopus laevis], Unknown (protein for MGC:99093) [Xenopus laevis], NA	NA	NA	NA	proteasomal ATPase-associated factor 1	0.09872125087728785	0.5258578184180631	FALSE	FALSE	FALSE
ENOG411CS69	0	0	0	4	0	1.822740620542688	0	1.7697437486713592	0	2	1.2888722531299102	ENOG411CS69	10505242, 120537871, 160420247, Xelaev18036994m.g, Xelaev18018522m.g, Xelaev18020367m.g, Xelaev18017318m.g, Xelaev18034791m.g, Xelaev18021364m.g	GenBank, Xenbase_9.1	hk1.S, loc100485269.L, loc100485269.S, hk2.L, hkdc1.L, hk2.S	hexokinase I [Xenopus laevis], LOC100036846 protein [Xenopus laevis], hexokinase 1 [Xenopus laevis], NA	P19367, P52789	HK1, HK2	NA	hexokinase	0.09872125087728785	0.5258578184180631	FALSE	FALSE	FALSE
ENOG411CYMN	0	0	0	4	0	1.822740620542688	0	1.7697437486713592	0	2	1.2888722531299102	ENOG411CYMN	124481820, Xelaev18023349m.g	GenBank, Xenbase_9.1	znf326.L	LOC100037139 protein [Xenopus laevis], NA	Q5BKZ1	ZNF326	ZIRD	Zinc finger protein 326	0.09872125087728785	0.5258578184180631	FALSE	FALSE	FALSE
ENOG411CVU3	0	0	0	4	0	1.822740620542688	0	1.7697437486713592	0	2	1.2888722531299102	ENOG411CVU3	104089, 120537942, 120577670, 214296, 226349, 33416699, 47506948, 47937673, 47937704, 49115624, 49119513, 50417528, 51703955, 54035132, 64828, 66911523, 763031, 85805, Xelaev18007079m.g, Xelaev18007075m.g	GenBank, Xenbase_9.1	loc548369.L, loc100135349.L	Ig heavy chain precursor - African clawed frog (fragment), Unknown (protein for IMAGE:8531379) [Xenopus laevis], LOC398774 protein [Xenopus laevis], Ig mu-chain VJC-region [Xenopus laevis], Ig CH II, MGC69066 protein [Xenopus laevis], Unknown (protein for MGC:82411) [Xenopus laevis], Unknown (protein for MGC:82540) [Xenopus laevis], Unknown (protein for MGC:85402) [Xenopus laevis], Ig heavy chain…	P01871	IGHM	NA	immunoglobulin heavy constant	0.09872125087728785	0.5258578184180631	FALSE	FALSE	FALSE
ENOG411CVAD	0	0	0	4	0	1.822740620542688	0	1.7697437486713592	0	2	1.2888722531299102	ENOG411CVAD	118723354, 147903871, Xelaev18029714m.g	GenBank, Xenbase_9.1	slc2a2.S	solute carrier family 2, facilitated glucose transporter member 2 [Xenopus laevis], solute carrier family 2 (facilitated glucose transporter), member 2 [Xenopus laevis], NA	P11168	SLC2A2	GLUT2	solute carrier family 2, facilitated glucose transporter member 2	0.09872125087728785	0.5258578184180631	FALSE	FALSE	FALSE
ENOG411CYZ3	0	0	0	4	0	1.822740620542688	0	1.7697437486713592	0	2	1.2888722531299102	ENOG411CYZ3	148235128, Xelaev18017896m.g	GenBank, Xenbase_9.1	loc100127794.L	uncharacterized protein LOC734450 [Xenopus laevis], NA	NA	NA	NA	cation exchanger C521.04c-like	0.09872125087728785	0.5258578184180631	FALSE	FALSE	FALSE
ENOG411CZMJ	0	0	0	4	0	1.822740620542688	0	1.7697437486713592	0	2	1.2888722531299102	ENOG411CZMJ	Xelaev18037505m.g, Xelaev18035653m.g	Xenbase_9.1	cpsf3l.S, cpsf3l.L	NA	Q5TA45	INTS11	CPSF3L RC68	cleavage and polyadenylation specific factor 3-like	0.09872125087728785	0.5258578184180631	FALSE	FALSE	FALSE
ENOG411CRVN	0	0	0	4	0	1.822740620542688	0	1.7697437486713592	0	2	1.2888722531299102	ENOG411CRVN	147903465, 147906755, Xelaev18011223m.g	GenBank, Xenbase_9.1	agpat3.L	1-acylglycerol-3-phosphate O-acyltransferase 3 [Xenopus laevis], NA	Q9NRZ7	AGPAT3	LPAAT3	1-acylglycerol-3-phosphate O-acyltransferase 3	0.09872125087728785	0.5258578184180631	FALSE	FALSE	FALSE
ENOG411CPXJ	0	0	0	4	0	1.822740620542688	0	1.7697437486713592	0	2	1.2888722531299102	ENOG411CPXJ	Xelaev18025160m.g, Xelaev18023036m.g	Xenbase_9.1	usp24.S, usp24.L	NA	Q9UPU5	USP24	KIAA1057	Ubiquitin specific peptidase 24	0.09872125087728785	0.5258578184180631	FALSE	FALSE	FALSE
ENOG411CQY0	0	0	0	4	0	1.822740620542688	0	1.7697437486713592	0	2	1.2888722531299102	ENOG411CQY0	1213275, 147900839, 147907425, 148228330, 148228963, 213623640, 50414687, 509561, 509567, 809528, 9858141, Xelaev18021368m.g, Xelaev18005030m.g, Xelaev18017313m.g, Xelaev18008865m.g	GenBank, Xenbase_9.1	fgfr4.S, fgfr3.L, fgfr4.L, fgfr3.S	FGF receptor 4 [Xenopus laevis], fibroblast growth factor receptor 4 precursor [Xenopus laevis], fibroblast growth factor receptor 3 (achondroplasia, thanatophoric dwarfism) [Xenopus laevis], fibroblast growth factor receptor 3 [Xenopus laevis], FGFR-4c protein [Xenopus laevis], LOC397701 protein [Xenopus laevis], putative protein-tyrosine kinase [Xenopus laevis], fibroblast growth factor recepto…	P22607	FGFR3	JTK4	Fibroblast growth factor receptor	0.09872125087728785	0.5258578184180631	FALSE	FALSE	FALSE
ENOG411CZ5N	1	9	2	23	0.3070070547330004	1.5125121158824222	0.12825380527194893	0.7108500596177907	5	12.5	1.2865943440410879	ENOG411CZ5N	Xelaev18006296m.g	Xenbase_9.1	lonp1.L	NA	P36776	LONP1	PRSS15	ATP-dependent serine protease that mediates the selective degradation of misfolded, unassembled or oxidatively damaged polypeptides as well as certain short-lived regulatory proteins in the mitochondrial matrix. May also have a chaperone function in the assembly of inner membrane protein complexes. Participates in the regulation of mitochondrial gene expression and in the maintenance of the integ…	0.09911785805730548	0.5269207802092144	FALSE	FALSE	FALSE
ENOG411CPDR	83	145	117	261	-0.07619256152520457	1.8905856509616608	0.03361693113387363	0.29141409644142974	114	189	1.282969657278528	ENOG411CPDR	125858814, 147898991, 147901600, 147902846, Xelaev18039676m.g, Xelaev18022349m.g, Xelaev18041207m.g, Xelaev18024161m.g	GenBank, Xenbase_9.1	pygl.L, loc100491051-like.L, pygl.S, loc100491051-like.S	LOC100037229 protein [Xenopus laevis], uncharacterized protein LOC432134 [Xenopus laevis], liver glycogen phosphorylase [Xenopus laevis], brain glycogen phosphorylase [Xenopus laevis], NA	P11216, P11217, P06737	PYGB, PYGM, PYGL	NA	Phosphorylase is an important allosteric enzyme in carbohydrate metabolism. Enzymes from different sources differ in their regulatory mechanisms and in their natural substrates. However, all known phosphorylases share catalytic and structural properties (By similarity)	0.09975135335792185	0.5292363469823076	FALSE	FALSE	FALSE
ENOG411CU81	20	22	33	44	0.5741093335597046	1.2033436216810958	0.2384367230223718	0.41610679405665874	21	38.5	1.2568490378908388	ENOG411CU81	147905905, 148226444, Xelaev18023999m.g	GenBank, Xenbase_9.1	rpn1.L	dolichyl-diphosphooligosaccharide--protein glycosyltransferase subunit 1 precursor [Xenopus laevis], similar to ribophorin I precursor [Xenopus laevis], NA	P04843	RPN1	NA	ribophorin I	0.10440415259409355	0.5519732206183868	FALSE	FALSE	FALSE
ENOG411CT39	3	5	7	12	0.7963134688030494	0.980783978698198	0.5432913045507926	0.5632928712039329	4	9.5	1.2565976559574368	ENOG411CT39	147902326, 148236509, 155369243, 213623606, Xelaev18027641m.g	GenBank, Xenbase_9.1	kpna4.L	karyopherin alpha 3 (importin alpha 4) [Xenopus laevis], karyopherin alpha 4 (importin alpha 3) [Xenopus laevis], importin alpha 4 protein [Xenopus laevis], Importin alpha 4 protein [Xenopus laevis], NA	O00629, O00505	KPNA4, KPNA3	QIP1, QIP2	Importin subunit alpha	0.104449681986875	0.5519732206183868	FALSE	FALSE	FALSE
ENOG411D4ST	1	8	6	13	1.5959913177930014	0.17875128067373605	1.3506462266083967	0.08524557439928863	4.5	9.5	1.2549325262364641	ENOG411D4ST	148233446, 3676338, Xelaev18029256m.g, Xelaev18027168m.g	GenBank, Xenbase_9.1	marcks.S, marcks.L	myristoylated alanine rich protein kinase C substrate [Xenopus laevis], myristoylated alanine-rich C kinase substrate [Xenopus laevis], NA	P29966	MARCKS	MACS PRKCSL	myristoylated alanine-rich protein kinase C substrate	0.10475162758464499	0.5524770259592519	FALSE	FALSE	FALSE
ENOG411CQUW	1	3	4	7	1.0630801652182171	0.7095854272972324	0.8652193994381551	0.447815653783997	2	5.5	1.2534638612437434	ENOG411CQUW	148745073, Xelaev18019044m.g, Xelaev18000738m.g, Xelaev18023388m.g, Xelaev18002800m.g, Xelaev18041681m.g	GenBank, Xenbase_9.1	dnm2.L, dnm2.S, dnm3.L, dnm1.L, dnm1.S	LOC100101298 protein [Xenopus laevis], NA	Q9UQ16, Q05193, P50570	DNM3, DNM1, DNM2	KIAA0820, DNM, DYN2	dynamin 2	0.10501847154318794	0.5527940805245759	FALSE	FALSE	FALSE
ENOG411D0RW	0	1	0	7	0	1.7681752766489778	0	1.447815653783997	0.5	3.5	1.2502887284448918	ENOG411D0RW	10129814, 114401, 147903986, 147904499, 148234585, 28279355, 9837363, Xelaev18019679m.g, Xelaev18029958m.g, Xelaev18001092m.g	GenBank, Xenbase_9.1	Xelaev18019679m.g, atp1b3.S, Xelaev18001092m.g	Na,K-ATPase beta-2 subunit [Xenopus laevis], RecName: Full=Sodium/potassium-transporting ATPase subunit beta-3; AltName: Full=Sodium/potassium-dependent ATPase subunit beta-3; Short=ATPB-3, ATPase, Na+/K+ transporting, beta 2 polypeptide [Xenopus laevis], sodium/potassium-transporting ATPase subunit beta-3 [Xenopus laevis], ATPase, Na+/K+ transporting, beta 3 polypeptide [Xenopus laevis], Atp1b2 …	P14415, P54709	ATP1B2, ATP1B3	NA	ATPase, Na K transporting, beta	0.10559704719654481	0.5536598121638447	FALSE	FALSE	FALSE
ENOG411CVXN	0	1	0	7	0	1.7681752766489778	0	1.447815653783997	0.5	3.5	1.2502887284448918	ENOG411CVXN	148230052, 148231518, Xelaev18036067m.g	GenBank, Xenbase_9.1	akt1s1.L	hypothetical protein LOC495075 [Xenopus laevis], AKT1 substrate 1 (proline-rich) [Xenopus laevis], NA	Q96B36	AKT1S1	PRAS40	AKT1 substrate 1 (Proline-rich)	0.10559704719654481	0.5536598121638447	FALSE	FALSE	FALSE
ENOG411CXVU	1	0	1	5	-0.2764018151375699	2.0379023504666143	-0.45670869544920745	2.032778154505153	0.5	3	1.245568973594901	ENOG411CXVU	119856, 27924365, 49118982, Xelaev18036567m.g, Xelaev18038075m.g	GenBank, Xenbase_9.1	fbl.L, fbl.S	RecName: Full=rRNA 2'-O-methyltransferase fibrillarin, LOC398434 protein [Xenopus laevis], NA	P22087, A6NHQ2	FBL, FBLL1	FIB1 FLRN, NA	Fibrillarin	0.1064613394035282	0.5570990637280516	FALSE	FALSE	FALSE
ENOG411CYIF	0	3	0	12	0	1.756075445036376	0	1.1482553719250892	1.5	6	1.2417328554604057	ENOG411CYIF	Xelaev18043829m.g	Xenbase_9.1	elac2.L	NA	Q9BQ52	ELAC2	HPC2	ElaC homolog 2 (E. coli)	0.10716757171411201	0.5596206041194943	FALSE	FALSE	FALSE
ENOG411CTG1	2	8	6	16	1.0284923925464566	0.7253983627995724	0.7656837258872404	0.36535349359202385	5	11	1.240188046565573	ENOG411CTG1	148227698	GenBank	NA	SUMO-activating enzyme subunit 1 [Xenopus laevis]	Q9UBE0	SAE1	AOS1 SUA1 UBLE1A	SUMO-1 activating enzyme subunit 1	0.10745292430853538	0.5596206041194943	FALSE	FALSE	FALSE
ENOG411CW1E	79	151	125	249	0.8118417057685833	0.9411458825500719	0.19864313316334675	0.16567242500249849	115	187	1.2395494110359728	ENOG411CW1E	122936479, 139635, 139636, 139639, 139640, 155369239, 189441688, 313758, 55391444, 77748400, Xelaev18022892m.g, Xelaev18025047m.g, Xelaev18022891m.g	GenBank, Xenbase_9.1	loc100494633.L, loc100494633.S, loc100485054.L	LOC100037071 protein [Xenopus laevis], RecName: Full=Vitellogenin-A1; Short=VTG A1; Flags: Precursor, RecName: Full=Vitellogenin-A2; Short=VTG A2; Contains: RecName: Full=Lipovitellin I; Contains: RecName: Full=Lipovitellin II; Contains: RecName: Full=Phosvitin; Flags: Precursor, RecName: Full=Vitellogenin-B1; Short=VTG B1; Flags: Precursor, RecName: Full=Vitellogenin-B2; Short=VTG B2; Flags: Pre…	NA	NA	NA	vitellogenin	0.10757105105363504	0.5596206041194943	FALSE	FALSE	FALSE
ENOG411CPDQ	1	2	4	5	1.0630801652182171	0.6802222002387145	0.8652193994381551	0.447815653783997	1.5	4.5	1.2327009242731453	ENOG411CPDQ	148233972, 1932815, 213626233, Xelaev18040800m.g, Xelaev18042915m.g, Xelaev18001677m.g	GenBank, Xenbase_9.1	adar.L, adar.S, Xelaev18001677m.g	adenosine deaminase, RNA-specific [Xenopus laevis], dsRNA adenosine deaminase [Xenopus laevis], Unknown (protein for MGC:196762) [Xenopus laevis], NA	P55265	ADAR	ADAR1 DSRAD G1P1 IFI4	Adenosine deaminase, RNA-specific	0.10884368344057513	0.5651417660584425	FALSE	FALSE	FALSE
ENOG411CW6S	3	2	4	10	-0.09451261085055432	1.8350835221119444	-0.1347806005618449	1.3222847717001378	2.5	7	1.2307694944889773	ENOG411CW6S	147902304, 148230887, 148235999, Xelaev18039542m.g, Xelaev18026540m.g	GenBank, Xenbase_9.1	loc100485426-like.L, smek2.L	serine/threonine-protein phosphatase 4 regulatory subunit 3-B [Xenopus laevis], serine/threonine-protein phosphatase 4 regulatory subunit 3-A [Xenopus laevis], serine/threonine-protein phosphatase 4 regulatory subunit 3 [Xenopus laevis], NA	Q6IN85, Q5MIZ7	PPP4R3A, PPP4R3B	KIAA2010 PP4R3A SMEK1, KIAA1387 PP4R3B SMEK2	suppressor of mek1 (Dictyostelium)	0.10920454397866321	0.5659165709281888	FALSE	FALSE	FALSE
ENOG411CVXK	4	14	12	23	1.4546796099312627	0.2731628522425764	0.9218029278045223	0.1258875588966346	9	17.5	1.2217691218251823	ENOG411CVXK	Xelaev18045865m.g, Xelaev18043090m.g	Xenbase_9.1	dnajc7.S, dnajc7.L	NA	Q99615	DNAJC7	TPR2 TTC2	DnaJ (Hsp40) homolog, subfamily C, member 7	0.11089747429517532	0.57357803919787	FALSE	FALSE	FALSE
ENOG411CWQQ	5	10	9	23	0.46407031200880344	1.2493918562026316	0.2802568987169987	0.5733465358678558	7.5	16	1.2116007184489104	ENOG411CWQQ	1095557, 148224359	GenBank	NA	ribosomal protein L22, ribosomal protein L27a [Xenopus laevis]	P46776	RPL27A	NA	Ribosomal protein L27a	0.11283262971367992	0.5785898030282417	FALSE	FALSE	FALSE
ENOG411CV1Z	15	21	25	42	0.5320327533148793	1.1756484683893738	0.24373102269188487	0.4146487898487976	18	33.5	1.2075129719720055	ENOG411CV1Z	147899539, Xelaev18020690m.g, Xelaev18040376m.g, Xelaev18018147m.g, Xelaev18008384m.g	GenBank, Xenbase_9.1	tarsl2.S, tars2.L, tarsl2.L, tars.L	threonyl-tRNA synthetase [Xenopus laevis], NA	P26639, A2RTX5	TARS, TARSL2	NA	Threonyl-tRNA	0.11361732621603503	0.5785898030282417	FALSE	FALSE	FALSE
ENOG411D3CU	2	1	6	3	1.0284923925464566	0.6777564202914759	0.7656837258872404	0.447815653783997	1.5	4.5	1.2065001059491984	ENOG411D3CU	146327490, 148236968, 47682838, Xelaev18039585m.g, Xelaev18041284m.g	GenBank, Xenbase_9.1	glrx5.L, glrx5.S	Unknown (protein for MGC:160815) [Xenopus laevis], glutaredoxin 5 [Xenopus laevis], Grx5-prov protein [Xenopus laevis], NA	Q86SX6	GLRX5	C14orf87	glutaredoxin 5	0.11381235912952296	0.5785898030282417	FALSE	FALSE	FALSE
ENOG411CRFF	7	30	19	46	1.6352823089445876	0.0648580022018484	0.8652193994381551	0.04820819507475885	18.5	32.5	1.2021807429802516	ENOG411CRFF	117558233, 148225023, 171846414, 49117032, 6273357, Xelaev18018997m.g, Xelaev18021625m.g	GenBank, Xenbase_9.1	dnmt1.L, dnmt1.S	LOC100036795 protein [Xenopus laevis], DNA (cytosine-5-)-methyltransferase 1 [Xenopus laevis], Dnmt1 protein [Xenopus laevis], DNA methyltransferase 1 [Xenopus laevis], NA	P26358	DNMT1	AIM CXXC9 DNMT	DNA (Cytosine-5)-methyltransferase 1	0.11464675428479079	0.5785898030282417	FALSE	FALSE	FALSE
ENOG411CQF2	4	9	11	16	1.2640953928779595	0.4349818755146154	0.8063257103845864	0.21335040014697376	6.5	13.5	1.201429058240305	ENOG411CQF2	147903082, Xelaev18046289m.g, Xelaev18046282m.g	GenBank, Xenbase_9.1	Xelaev18046289m.g, Xelaev18046282m.g	vesicle-associated membrane protein-associated protein B/C [Xenopus laevis], NA	O95292	VAPB	NA	VAMP (vesicle-associated membrane protein)-associated protein B and C	0.11479240493898502	0.5785898030282417	FALSE	FALSE	FALSE
ENOG411CUG1	1	7	7	10	1.8191648725954959	-0.1301299692555288	1.5432913045507926	-0.09275272757870585	4	8.5	1.1943280338124553	ENOG411CUG1	112419036, 57033170, 76780301, Xelaev18030315m.g	GenBank, Xenbase_9.1	eif2b4.S	LOC496301 protein [Xenopus laevis], NA	Q9UI10	EIF2B4	EIF2BD	Eukaryotic translation initiation factor 2B, subunit 4 delta, 67kDa	0.11617483786153902	0.5785898030282417	FALSE	FALSE	FALSE
ENOG411DEXH	1	10	5	17	1.3471557549751167	0.3286335778092541	1.1282538052719489	0.1583090365890121	5.5	11	1.1849620010519086	ENOG411DEXH	147902226, 148224502, Xelaev18001535m.g, Xelaev18004559m.g	GenBank, Xenbase_9.1	fus.L, fus.S	fused in sarcoma [Xenopus laevis], MGC84691 protein [Xenopus laevis], NA	NA	NA	NA	fused in sarcoma	0.11801623566572957	0.5785898030282417	FALSE	FALSE	FALSE
ENOG411CZ3K	3	1	4	7	-0.09451261085055432	1.7681752766489778	-0.1347806005618449	1.447815653783997	2	5.5	1.1834582204048196	ENOG411CZ3K	147899920, 148230585, Xelaev18008420m.g	GenBank, Xenbase_9.1	txnl1.L	uncharacterized protein LOC734269 [Xenopus laevis], thioredoxin-like 1 [Xenopus laevis], NA	O43396	TXNL1	TRP32 TXL TXNL	Thioredoxin-like 1	0.11831379759205898	0.5785898030282417	FALSE	FALSE	FALSE
ENOG411CU32	0	2	2	4	1.3048031678308571	0.3626466885734892	1.1282538052719489	0.184781247950203	1	3	1.179065100752048	ENOG411CU32	301171214, 49115760, Xelaev18019079m.g	GenBank, Xenbase_9.1	rnaseh2a.L	ribonuclease H2, subunit A [Xenopus laevis], LOC443655 protein [Xenopus laevis], NA	O75792	RNASEH2A	RNASEHI RNHIA	Endonuclease that specifically degrades the RNA of RNA- DNA hybrids (By similarity)	0.11918612699662746	0.5785898030282417	FALSE	FALSE	FALSE
ENOG411CSAG	9	13	14	30	0.22842639687113878	1.436885588254075	0.12825380527194893	0.5946570421132681	11	22	1.1775533974732695	ENOG411CSAG	120577450, 140245, 140247, 147903761, 27503841, Xelaev18035694m.g, Xelaev18005939m.g	GenBank, Xenbase_9.1	Xelaev18035694m.g, Xelaev18005939m.g	LOC100037035 protein [Xenopus laevis], RecName: Full=Nuclease-sensitive element-binding protein 1; AltName: Full=Y-box transcription factor; AltName: Full=Y-box-binding protein 1; Short=YB-1, RecName: Full=B box-binding protein; AltName: Full=Protein YB3, nuclease-sensitive element-binding protein 1 [Xenopus laevis], Nsep1 protein [Xenopus laevis], NA	P67809	YBX1	NSEP1 YB1	Y box binding protein 1	0.1194873489723391	0.5785898030282417	FALSE	FALSE	FALSE
ENOG411CSYG	1	3	1	13	-0.2764018151375699	1.9281909727377486	-0.45670869544920745	1.2551705758416012	2	7	1.167991314429501	ENOG411CSYG	148921625, Xelaev18047536m.g, Xelaev18045214m.g	GenBank, Xenbase_9.1	c16orf62.S, c16orf62.L	LOC100101331 protein [Xenopus laevis], NA	Q7Z3J2	VPS35L	C16orf62	Chromosome 16 open reading frame 62	0.12140513419898522	0.5785898030282417	FALSE	FALSE	FALSE
ENOG411CZ8B	0	3	1	7	0.9226215573892205	0.7095854272972324	0.5432913045507926	0.447815653783997	1.5	4	1.154144627171838	ENOG411CZ8B	124481711, 169642723, Xelaev18037657m.g, Xelaev18037653m.g, Xelaev18037656m.g, Xelaev18035874m.g, Xelaev18037655m.g, Xelaev18037654m.g	GenBank, Xenbase_9.1	6330408a02rik-like.2.S, Xelaev18037653m.g, 6330408a02rik-like.1.S, Xelaev18035874m.g, Xetrov90018982m.S, Xetrov90018981m.S	LOC100037150 protein [Xenopus laevis], NA	Q86XI8	ZSWIM9	C19orf68	chromosome 19 open reading frame 68	0.12422043988602856	0.5785898030282417	FALSE	FALSE	FALSE
ENOG411CRFV	14	36	27	61	1.0191174943771435	0.6060115842624525	0.44375563099987825	0.1925585985419225	25	44	1.1491397918095043	ENOG411CRFV	124481718, 147899434, 147900253, 148223545, 50415013, 54038415, Xelaev18015399m.g, Xelaev18002200m.g, Xelaev18003389m.g	GenBank, Xenbase_9.1	atp2a3.S, atp2a1.S, atp2a1.L	ATP2A2 protein [Xenopus laevis], ATPase, Ca++ transporting, cardiac muscle, slow twitch 2 [Xenopus laevis], ATPase, Ca++ transporting, ubiquitous [Xenopus laevis], uncharacterized protein LOC495046 [Xenopus laevis], LOC495046 protein [Xenopus laevis], NA	P16615, O14983, Q93084	ATP2A2, ATP2A1, ATP2A3	ATP2B, NA	ATPase CA transporting cardiac muscle	0.12524917133018443	0.5785898030282417	FALSE	FALSE	FALSE
ENOG411CVDK	13	26	23	48	0.691141104774467	0.9191323532378619	0.32089888321434484	0.3076379957357366	19.5	35.5	1.138635281725229	ENOG411CVDK	1002598, 109940097, 148236609, 311819824, 64613, Xelaev18033701m.g	GenBank, Xenbase_9.1	mcm4.S	Cdc21 [Xenopus laevis], RecName: Full=DNA replication licensing factor mcm4-B; AltName: Full=CDC21 homolog-B; AltName: Full=Minichromosome maintenance protein 4-B; Short=xMCM4-B; AltName: Full=P1-CDC21-B, DNA replication licensing factor mcm4-A [Xenopus laevis], unnamed protein product [Xenopus laevis], S.pombe cdc21+ homologue [Xenopus laevis], NA	P33991	MCM4	CDC21	Minichromosome maintenance complex component 4	0.12742765317656174	0.5785898030282417	FALSE	FALSE	FALSE
ENOG411CX0W	0	2	1	5	0.9226215573892205	0.6802222002387145	0.5432913045507926	0.447815653783997	1	3	1.13338169020124	ENOG411CX0W	148233996, 2282610, 50415046, Xelaev18020677m.g, Xelaev18018164m.g	GenBank, Xenbase_9.1	adam10.S, adam10.L	disintegrin and metalloproteinase domain-containing protein 10 precursor [Xenopus laevis], kuzbanian [Xenopus laevis], Unknown (protein for MGC:80932) [Xenopus laevis], NA	O14672	ADAM10	KUZ MADM	ADAM metallopeptidase domain 10	0.12852699988650085	0.5785898030282417	FALSE	FALSE	FALSE
ENOG411CVSN	0	2	1	5	0.9226215573892205	0.6802222002387145	0.5432913045507926	0.447815653783997	1	3	1.13338169020124	ENOG411CVSN	122936408, 51258264	GenBank	NA	Paf1 protein [Xenopus laevis]	Q8N7H5	PAF1	PD2	paf1, RNA polymerase II associated factor, homolog (S. cerevisiae)	0.12852699988650085	0.5785898030282417	FALSE	FALSE	FALSE
ENOG411DBEC	2	5	6	10	1.0284923925464566	0.5734362556230626	0.7656837258872404	0.32228477170013786	3.5	8	1.132734610097666	ENOG411DBEC	138999376, 138999382, 148224548, 393277	GenBank	NA	protein phosphatase 1 gamma 1 [Xenopus laevis], protein phosphatase 1 zeta [Xenopus laevis], serine/threonine-protein phosphatase PP1-gamma catalytic subunit B [Xenopus laevis], protein phosphatase 1-gamma 1 [Xenopus laevis]	P36873	PPP1CC	NA	protein phosphatase 1, catalytic subunit, gamma	0.12866285937521965	0.5785898030282417	FALSE	FALSE	FALSE
ENOG411CXTY	0	1	1	3	0.9226215573892205	0.6777564202914759	0.5432913045507926	0.447815653783997	0.5	2	1.1316381204796335	ENOG411CXTY	148233042, 49118486, 50415396, Xelaev18012650m.g, Xelaev18015284m.g	GenBank, Xenbase_9.1	rps6kb1.L, rps6kb1.S	ribosomal protein S6 kinase, 70kDa, polypeptide 1 [Xenopus laevis], Rps6kb1-A protein [Xenopus laevis], Unknown (protein for MGC:82916) [Xenopus laevis], NA	K7ERJ3, Q9UBS0, P23443	NA, RPS6KB2, RPS6KB1	NA, STK14B, STK14A	ribosomal protein S6 kinase, 70kDa, polypeptide	0.12889330330948906	0.5785898030282417	FALSE	FALSE	FALSE
ENOG411DF0W	0	1	1	3	0.9226215573892205	0.6777564202914759	0.5432913045507926	0.447815653783997	0.5	2	1.1316381204796335	ENOG411DF0W	147899135, Xelaev18023521m.g, Xelaev18025542m.g, Xelaev18023524m.g	GenBank, Xenbase_9.1	serhl.L, serhl2.S, serhl2.L	serine hydrolase-like 2 [Xenopus laevis], NA	NA	NA	NA	Serine hydrolase-like	0.12889330330948906	0.5785898030282417	FALSE	FALSE	FALSE
ENOG411D3TH	0	1	1	3	0.9226215573892205	0.6777564202914759	0.5432913045507926	0.447815653783997	0.5	2	1.1316381204796335	ENOG411D3TH	118835457	GenBank	NA	MGC78968 protein [Xenopus laevis]	P62314	SNRPD1	NA	Small nuclear ribonucleoprotein D1 polypeptide 16kDa	0.12889330330948906	0.5785898030282417	FALSE	FALSE	FALSE
ENOG411CPDZ	0	0	3	0	1.5980745634395823	0	1.5432913045507926	0	0	1.5	1.13000936064986	ENOG411CPDZ	54648209, Xelaev18000028m.g, Xelaev18000478m.g, Xelaev18021007m.g, Xelaev18017725m.g, Xelaev18041732m.g, Xelaev18002890m.g	GenBank, Xenbase_9.1	Xelaev18000028m.g, Xelaev18000478m.g, abcd2.S, abcd2.L, Xelaev18041732m.g, Xelaev18002890m.g	LOC495468 protein [Xenopus laevis], NA	Q9UBJ2, P33897	ABCD2, ABCD1	ALD1 ALDL1 ALDR ALDRP, ALD	ATP-binding cassette, sub-family D (ALD), member	0.12923614009676773	0.5785898030282417	FALSE	FALSE	FALSE
ENOG411DGJ7	0	0	3	0	1.5980745634395823	0	1.5432913045507926	0	0	1.5	1.13000936064986	ENOG411DGJ7	147906584, 315192363, 315192365, 315192367, 315192369, 315192373, 315192375, 315192379, 315192381, 315192383, Xelaev18032894m.g, Xelaev18030757m.g	GenBank, Xenbase_9.1	mastl.S, mastl.L	serine/threonine-protein kinase greatwall [Xenopus laevis], Mastl [Xenopus laevis], NA	NA	NA	NA	microtubule associated serine threonine kinase-like	0.12923614009676773	0.5785898030282417	FALSE	FALSE	FALSE
ENOG411CY8J	0	0	3	0	1.5980745634395823	0	1.5432913045507926	0	0	1.5	1.13000936064986	ENOG411CY8J	Xelaev18024444m.g, Xelaev18021923m.g	Xenbase_9.1	madd.S, madd.L	NA	Q8WXG6	MADD	DENN IG20 KIAA0358	MAP-kinase activating death domain	0.12923614009676773	0.5785898030282417	FALSE	FALSE	FALSE
ENOG411CTK7	0	0	3	0	1.5980745634395823	0	1.5432913045507926	0	0	1.5	1.13000936064986	ENOG411CTK7	Xelaev18015152m.g, Xelaev18012461m.g	Xenbase_9.1	sfpq.S, sfpq.L	NA	P23246	SFPQ	PSF	splicing factor proline glutamine-rich	0.12923614009676773	0.5785898030282417	FALSE	FALSE	FALSE
ENOG411CR04	0	0	3	0	1.5980745634395823	0	1.5432913045507926	0	0	1.5	1.13000936064986	ENOG411CR04	147899571, Xelaev18032150m.g, Xelaev18033843m.g, Xelaev18022870m.g	GenBank, Xenbase_9.1	e2f5.L, e2f5.S, e2f4.L	E2F transcription factor 4, p107/p130-binding [Xenopus laevis], NA	Q16254, Q15329	E2F4, E2F5	NA	E2F transcription factor	0.12923614009676773	0.5785898030282417	FALSE	FALSE	FALSE
Xelaev18011137m.g	0	0	3	0	1.5980745634395823	0	1.5432913045507926	0	0	1.5	1.13000936064986	Xelaev18011137m.g	NA	Xenbase_9.1	Xelaev18011137m.g	NA	NA	NA	NA	NA	0.12923614009676773	0.5785898030282417	FALSE	FALSE	FALSE
ENOG411DGEQ	0	0	3	0	1.5980745634395823	0	1.5432913045507926	0	0	1.5	1.13000936064986	ENOG411DGEQ	291464073, Xelaev18043420m.g, Xelaev18046152m.g	GenBank, Xenbase_9.1	zmynd8.L, zmynd8.S	zinc finger and MYND domain containing protein 8 [Xenopus laevis], NA	Q9ULU4	ZMYND8	KIAA1125 PRKCBP1 RACK7	zinc finger, MYND-type containing 8	0.12923614009676773	0.5785898030282417	FALSE	FALSE	FALSE
ENOG411CXCB	1	0	2	2	0.3070070547330004	1.2888515295454006	0.12825380527194893	1.032778154505153	0.5	2	1.1284424267580206	ENOG411CXCB	148228026, 148228617, Xelaev18018141m.g, Xelaev18006092m.g, Xelaev18006876m.g, Xelaev18010096m.g, Xelaev18009646m.g	GenBank, Xenbase_9.1	apba2.L, apba3.L, apba1.L, apba1.S, apba3.S	uncharacterized protein LOC495441 [Xenopus laevis], amyloid beta (A4) precursor protein-binding, family A, member 2 [Xenopus laevis], NA	O96018, Q02410, Q99767	APBA3, APBA1, APBA2	MINT3 X11L2, MINT1 X11, MINT2 X11L	amyloid beta A4 precursor protein-binding family A member	0.12956655924318822	0.5785898030282417	FALSE	FALSE	FALSE
ENOG411CSR1	1	0	2	2	0.3070070547330004	1.2888515295454006	0.12825380527194893	1.032778154505153	0.5	2	1.1284424267580206	ENOG411CSR1	146327123, Xelaev18015375m.g, Xelaev18012776m.g	GenBank, Xenbase_9.1	sbds.S, sbds.L	LOC100049749 protein [Xenopus laevis], NA	Q9Y3A5	SBDS	NA	Required for the assembly of mature ribosomes and ribosome biogenesis. Together with EFTUD1, triggers the GTP- dependent release of EIF6 from 60S pre-ribosomes in the cytoplasm, thereby activating ribosomes for translation competence by allowing 80S ribosome assembly and facilitating EIF6 recycling to the nucleus, where it is required for 60S rRNA processing and nuclear export. Required for norma…	0.12956655924318822	0.5785898030282417	FALSE	FALSE	FALSE
ENOG411CUIH	4	6	6	17	0.08909363321863015	1.5060600203774834	0.028718131721034334	0.8103857331687053	5	11.5	1.1279439654923087	ENOG411CUIH	148232684, Xelaev18040783m.g	GenBank, Xenbase_9.1	ppox.L	protoporphyrinogen oxidase [Xenopus laevis], NA	P50336	PPOX	NA	protoporphyrinogen oxidase	0.12967179229276382	0.5785898030282417	FALSE	FALSE	FALSE
ENOG411CXBJ	0	2	3	3	1.5980745634395823	-0.010324120500485229	1.5432913045507926	-0.1371468469371592	1	3	1.12270910503418	ENOG411CXBJ	148237404	GenBank	NA	family with sequence similarity 98, member A [Xenopus laevis]	Q17RN3	FAM98C	NA	Family with sequence similarity 98, member C	0.1307805298739563	0.5785898030282417	FALSE	FALSE	FALSE
ENOG411CSMI	0	4	3	6	1.5980745634395823	-0.014601098188945566	1.5432913045507926	-0.06675751904576134	2	4.5	1.119684825107686	ENOG411CSMI	114107924	GenBank	NA	Mrpl16 protein [Xenopus laevis]	Q9NX20	MRPL16	NA	Mitochondrial ribosomal protein L16	0.13142404694095441	0.5785898030282417	FALSE	FALSE	FALSE
ENOG411CV1S	1	4	6	6	1.5959913177930014	-0.014601098188945566	1.3506462266083967	-0.06675751904576134	2.5	6	1.1182117479841114	ENOG411CV1S	147900626	GenBank	NA	eukaryotic peptide chain release factor subunit 1 [Xenopus laevis]	P62495	ETF1	ERF1 RF1 SUP45L1	eukaryotic translation termination factor 1	0.13173828398827228	0.5785898030282417	FALSE	FALSE	FALSE
ENOG411CR5G	0	0	0	3	0	1.5785269911948188	0	1.447815653783997	0	1.5	1.116187139759854	ENOG411CR5G	147906425, 288557296, 97181299, Xelaev18037787m.g, Xelaev18036054m.g, Xelaev18016855m.g	GenBank, Xenbase_9.1	Xelaev18037787m.g, Xelaev18036054m.g, ric8b.L	resistance to inhibitors of cholinesterase 8 homolog A [Xenopus laevis], synembryn-A [Xenopus laevis], RecName: Full=Synembryn-A; AltName: Full=Protein Ric-8A, NA	Q9NVN3, Q9NPQ8	RIC8B, RIC8A	NA	Resistance to inhibitors of cholinesterase 8 homolog	0.13217101906200648	0.5785898030282417	FALSE	FALSE	FALSE
ENOG411CQN9	0	0	0	3	0	1.5785269911948188	0	1.447815653783997	0	1.5	1.116187139759854	ENOG411CQN9	147907164, Xelaev18039628m.g	GenBank, Xenbase_9.1	pole2.L	DNA-directed DNA polymerase epsilon 2 [Xenopus laevis], NA	P56282	POLE2	DPE2	polymerase (DNA directed), epsilon 2, accessory subunit	0.13217101906200648	0.5785898030282417	FALSE	FALSE	FALSE
ENOG411CUD5	0	0	0	3	0	1.5785269911948188	0	1.447815653783997	0	1.5	1.116187139759854	ENOG411CUD5	148225300, Xelaev18037778m.g	GenBank, Xenbase_9.1	nosip.S	nitric oxide synthase-interacting protein [Xenopus laevis], NA	NA	NA	NA	Nitric oxide synthase interacting protein	0.13217101906200648	0.5785898030282417	FALSE	FALSE	FALSE
ENOG411CVDG	0	0	0	3	0	1.5785269911948188	0	1.447815653783997	0	1.5	1.116187139759854	ENOG411CVDG	Xelaev18014630m.g, Xelaev18035077m.g, Xelaev18011941m.g	Xenbase_9.1	aipl1.S, aip.L, aipl1.L	NA	Q9NZN9, O00170	AIPL1, AIP	AIPL2, XAP2	aryl hydrocarbon receptor interacting	0.13217101906200648	0.5785898030282417	FALSE	FALSE	FALSE
ENOG411CS6Z	0	0	0	3	0	1.5785269911948188	0	1.447815653783997	0	1.5	1.116187139759854	ENOG411CS6Z	147904934, Xelaev18025436m.g, Xelaev18023389m.g	GenBank, Xenbase_9.1	mettl13.S, mettl13.L	methyltransferase-like protein 13 [Xenopus laevis], NA	Q8N6R0	EEF1AKNMT	KIAA0859 METTL13	methyltransferase like 13	0.13217101906200648	0.5785898030282417	FALSE	FALSE	FALSE
ENOG411CZ0V	0	0	0	3	0	1.5785269911948188	0	1.447815653783997	0	1.5	1.116187139759854	ENOG411CZ0V	Xelaev18010094m.g, Xelaev18006873m.g	Xenbase_9.1	tjp2.S, tjp2.L	NA	Q9UDY2	TJP2	X104 ZO2	tight junction protein 2	0.13217101906200648	0.5785898030282417	FALSE	FALSE	FALSE
ENOG411CXKS	0	0	0	3	0	1.5785269911948188	0	1.447815653783997	0	1.5	1.116187139759854	ENOG411CXKS	120577438, Xelaev18034920m.g	GenBank, Xenbase_9.1	sgpl1.L	LOC100037007 protein [Xenopus laevis], NA	O95470	SGPL1	KIAA1252	sphingosine-1-phosphate lyase 1	0.13217101906200648	0.5785898030282417	FALSE	FALSE	FALSE
ENOG411CTQX	0	0	0	3	0	1.5785269911948188	0	1.447815653783997	0	1.5	1.116187139759854	ENOG411CTQX	Xelaev18042330m.g, Xelaev18039019m.g	Xenbase_9.1	map7d3.S, map7d3.L	NA	Q8IWC1	MAP7D3	MDP3	MAP7 domain containing 3	0.13217101906200648	0.5785898030282417	FALSE	FALSE	FALSE
ENOG411CYFK	0	0	0	3	0	1.5785269911948188	0	1.447815653783997	0	1.5	1.116187139759854	ENOG411CYFK	148229111, Xelaev18023971m.g, Xelaev18017404m.g, Xelaev18021285m.g	GenBank, Xenbase_9.1	aldh1l1.L, aldh1l2.L, aldh1l2.S	aldehyde dehydrogenase family 1 member L1 [Xenopus laevis], NA	Q3SY69, O75891	ALDH1L2, ALDH1L1	NA, FTHFD	Aldehyde dehydrogenase 1 family, member	0.13217101906200648	0.5785898030282417	FALSE	FALSE	FALSE
ENOG411CQKN	0	0	0	3	0	1.5785269911948188	0	1.447815653783997	0	1.5	1.116187139759854	ENOG411CQKN	Xelaev18029114m.g, Xelaev18014546m.g, Xelaev18011842m.g	Xenbase_9.1	map3k5.S, map3k15.S, map3k15.L	NA	Q99683, Q6ZN16, O95382	MAP3K5, MAP3K15, MAP3K6	ASK1 MAPKKK5 MEKK5, ASK3, ASK2 MAPKKK6 MEKK6	Mitogen-activated protein kinase kinase kinase	0.13217101906200648	0.5785898030282417	FALSE	FALSE	FALSE
ENOG411CPG3	0	0	0	3	0	1.5785269911948188	0	1.447815653783997	0	1.5	1.116187139759854	ENOG411CPG3	189442675	GenBank	NA	LOC100174798 protein [Xenopus laevis]	Q6NUQ1	RINT1	NA	RAD50 interactor 1	0.13217101906200648	0.5785898030282417	FALSE	FALSE	FALSE
ENOG411CT5X	0	0	0	3	0	1.5785269911948188	0	1.447815653783997	0	1.5	1.116187139759854	ENOG411CT5X	125858115, 148222335, Xelaev18047686m.g	GenBank, Xenbase_9.1	nme3.S	LOC100037175 protein [Xenopus laevis], nucleoside diphosphate kinase 3 precursor [Xenopus laevis], NA	Q13232	NME3	NA	NME NM23 nucleoside diphosphate kinase 3	0.13217101906200648	0.5785898030282417	FALSE	FALSE	FALSE
ENOG411D1DC	0	0	0	3	0	1.5785269911948188	0	1.447815653783997	0	1.5	1.116187139759854	ENOG411D1DC	148233848	GenBank	NA	MGC80435 protein [Xenopus laevis]	O14966	RAB29	RAB7L1	RAB7, member RAS oncogene family-like 1	0.13217101906200648	0.5785898030282417	FALSE	FALSE	FALSE
ENOG411CQGM	0	0	0	3	0	1.5785269911948188	0	1.447815653783997	0	1.5	1.116187139759854	ENOG411CQGM	Xelaev18005231m.g, Xelaev18009005m.g	Xenbase_9.1	rbm47.L, rbm47.S	NA	A0AV96	RBM47	NA	RNA binding motif protein 47	0.13217101906200648	0.5785898030282417	FALSE	FALSE	FALSE
ENOG411CQEC	0	0	0	3	0	1.5785269911948188	0	1.447815653783997	0	1.5	1.116187139759854	ENOG411CQEC	133263, 147901031, Xelaev18010325m.g	GenBank, Xenbase_9.1	hnrnpc.S	RecName: Full=Heterogeneous nuclear ribonucleoprotein C; Short=hnRNP C; AltName: Full=hnRNP core protein C, heterogeneous nuclear ribonucleoprotein C (C1/C2) [Xenopus laevis], NA	P07910, O60812, B2RXH8, B7ZW38, P0DMR1, A0A0G2JPF8, A0A0G2JNQ3, Q86SE5	HNRNPC, HNRNPCL1, HNRNPCL2, HNRNPCL3, HNRNPCL4, RALYL	HNRPC, HNRPCL1, HNRNPCP5, NA, HNRPCL3	RALY RNA binding protein-like	0.13217101906200648	0.5785898030282417	FALSE	FALSE	FALSE
ENOG411D0CH	0	0	0	3	0	1.5785269911948188	0	1.447815653783997	0	1.5	1.116187139759854	ENOG411D0CH	114107778, 120538267, 120577614, 147901389, 147906190, 47937689, Xelaev18024874m.g, Xelaev18037706m.g, Xelaev18036184m.g, Xelaev18036185m.g, Xelaev18037896m.g	GenBank, Xenbase_9.1	loc100486268-like.S, sult2b1.S, loc100498051.L, loc100144919.L, sult2a1.S	Sult5a1 protein [Xenopus laevis], LOC100036899 protein [Xenopus laevis], LOC100037047 protein [Xenopus laevis], sulfotransferase family, cytosolic, 2A, dehydroepiandrosterone (DHEA)-preferring, member 1 [Xenopus laevis], MGC82150 protein [Xenopus laevis], LOC432283 protein [Xenopus laevis], NA	O00204, Q06520	SULT2B1, SULT2A1	HSST2, HST STD	sulfotransferase family cytosolic 2B member	0.13217101906200648	0.5785898030282417	FALSE	FALSE	FALSE
ENOG411D077	0	0	0	3	0	1.5785269911948188	0	1.447815653783997	0	1.5	1.116187139759854	ENOG411D077	148237165, Xelaev18037175m.g, Xelaev18035192m.g	GenBank, Xenbase_9.1	exosc10.S, exosc10.L	exosome component 10 [Xenopus laevis], NA	Q01780	EXOSC10	PMSCL PMSCL2 RRP6	Exosome component 10	0.13217101906200648	0.5785898030282417	FALSE	FALSE	FALSE
ENOG411DG8C	0	0	0	3	0	1.5785269911948188	0	1.447815653783997	0	1.5	1.116187139759854	ENOG411DG8C	120538030, 169806801, Xelaev18008653m.g	GenBank, Xenbase_9.1	aup1.S	LOC100036951 protein [Xenopus laevis], NA	NA	NA	NA	Ancient ubiquitous protein 1	0.13217101906200648	0.5785898030282417	FALSE	FALSE	FALSE
ENOG411CV1E	0	0	0	3	0	1.5785269911948188	0	1.447815653783997	0	1.5	1.116187139759854	ENOG411CV1E	189442677, 50415052, Xelaev18013967m.g, Xelaev18002023m.g, Xelaev18016499m.g, Xelaev18000698m.g	GenBank, Xenbase_9.1	Xelaev18013967m.g, Xelaev18002023m.g, Xelaev18016499m.g, Xelaev18000698m.g	LOC100174804 protein [Xenopus laevis], Nup98 protein [Xenopus laevis], NA	P52948	NUP98	ADAR2	nucleoporin 98kDa	0.13217101906200648	0.5785898030282417	FALSE	FALSE	FALSE
ENOG411CQMH	0	0	0	3	0	1.5785269911948188	0	1.447815653783997	0	1.5	1.116187139759854	ENOG411CQMH	147906809, 213623422, 54038334, Xelaev18038707m.g, Xelaev18015709m.g, Xelaev18013190m.g, Xelaev18038702m.g, Xelaev18038693m.g	GenBank, Xenbase_9.1	Xelaev18038707m.g, irg1.S, irg1.L, Xelaev18038702m.g, Xelaev18038693m.g	immunoresponsive gene 1 [Xenopus laevis], XIRG protein-like [Xenopus laevis], Unknown (protein for MGC:98823) [Xenopus laevis], NA	A6NK06	ACOD1	IRG1	immunoresponsive 1 homolog (mouse)	0.13217101906200648	0.5785898030282417	FALSE	FALSE	FALSE
ENOG411CQZU	0	0	0	3	0	1.5785269911948188	0	1.447815653783997	0	1.5	1.116187139759854	ENOG411CQZU	147904643, 148232994	GenBank	NA	SH3 domain-binding protein 4-A [Xenopus laevis], SH3 domain-binding protein 4-B [Xenopus laevis]	Q9P0V3	SH3BP4	BOG25 EHB10 TTP	SH3-domain binding protein 4	0.13217101906200648	0.5785898030282417	FALSE	FALSE	FALSE
ENOG411CQGP	0	0	0	3	0	1.5785269911948188	0	1.447815653783997	0	1.5	1.116187139759854	ENOG411CQGP	72679347, 83318456, Xelaev18010671m.g, Xelaev18007864m.g	GenBank, Xenbase_9.1	naa25.S, naa25.L	LOC734215 protein [Xenopus laevis], LOC733434 protein [Xenopus laevis], NA	Q14CX7	NAA25	C12orf30 MDM20 NAP1	N-alpha-acetyltransferase 25, NatB auxiliary subunit	0.13217101906200648	0.5785898030282417	FALSE	FALSE	FALSE
ENOG411CRK6	0	0	0	3	0	1.5785269911948188	0	1.447815653783997	0	1.5	1.116187139759854	ENOG411CRK6	Xelaev18001772m.g, Xelaev18017417m.g, Xelaev18009541m.g, Xelaev18023867m.g, Xelaev18044932m.g, Xelaev18047641m.g	Xenbase_9.1	dnah12.L, dnah3.L, dnah6.S, dnah1.L, dnah7.L, dnah3.S	NA	Q9P2D7, Q8WXX0, Q8TD57, Q9C0G6	DNAH1, DNAH7, DNAH3, DNAH6	DHC7 DNAHC1 KIAA1410, KIAA0944, DNAHC3B, DNAHC6 DNHL1 HL2 KIAA1697	Dynein, axonemal heavy chain	0.13217101906200648	0.5785898030282417	FALSE	FALSE	FALSE
ENOG411CRX6	0	0	0	3	0	1.5785269911948188	0	1.447815653783997	0	1.5	1.116187139759854	ENOG411CRX6	148236643, Xelaev18036105m.g	GenBank, Xenbase_9.1	pih1d1.L	PIH1 domain-containing protein 1 [Xenopus laevis], NA	Q9NWS0	PIH1D1	NOP17	PIH1 domain containing 1	0.13217101906200648	0.5785898030282417	FALSE	FALSE	FALSE
ENOG411CYRG	0	0	0	3	0	1.5785269911948188	0	1.447815653783997	0	1.5	1.116187139759854	ENOG411CYRG	148236135, Xelaev18035338m.g, Xelaev18035330m.g, Xelaev18035328m.g, Xelaev18035348m.g, Xelaev18003872m.g, Xelaev18035331m.g, Xelaev18035325m.g, Xelaev18035317m.g, Xelaev18035349m.g, Xelaev18035345m.g, Xelaev18035320m.g, Xelaev18035344m.g, Xelaev18035347m.g, Xelaev18035342m.g	GenBank, Xenbase_9.1	Xelaev18035338m.g, Xetrov90018408m.L, Xelaev18035328m.g, Xelaev18035348m.g, Xelaev18003872m.g, Xelaev18035331m.g, loc101732086.L, Xelaev18035317m.g, loc100495178.L, Xelaev18035345m.g, loc100487011.L, Xelaev18035344m.g, Xelaev18035347m.g, Xelaev18035342m.g	uncharacterized protein LOC495510 [Xenopus laevis], NA	Q96DL1, Q8N323, Q6UWF7	NXPE2, NXPE1, NXPE4	FAM55B, FAM55A, C11orf33 FAM55D	neurexophilin and PC-esterase domain family, member	0.13217101906200648	0.5785898030282417	FALSE	FALSE	FALSE
ENOG411CT6Q	0	0	0	3	0	1.5785269911948188	0	1.447815653783997	0	1.5	1.116187139759854	ENOG411CT6Q	148235399	GenBank	NA	enoyl CoA hydratase domain containing 1 [Xenopus laevis]	Q9NTX5	ECHDC1	NA	enoyl CoA hydratase domain containing 1	0.13217101906200648	0.5785898030282417	FALSE	FALSE	FALSE
ENOG411CTYN	0	0	0	3	0	1.5785269911948188	0	1.447815653783997	0	1.5	1.116187139759854	ENOG411CTYN	148224746, 213623726, Xelaev18031897m.g, Xelaev18030088m.g, Xelaev18028054m.g, Xelaev18033639m.g	GenBank, Xenbase_9.1	rock1.L, rock2.S, rock2.L, rock1.S	Rho-associated, coiled-coil containing protein kinase 2 [Xenopus laevis], Unknown (protein for MGC:196865) [Xenopus laevis], NA	O75116, Q13464	ROCK2, ROCK1	KIAA0619, NA	rho-associated, coiled-coil containing protein kinase	0.13217101906200648	0.5785898030282417	FALSE	FALSE	FALSE
ENOG411CTWI	0	0	0	3	0	1.5785269911948188	0	1.447815653783997	0	1.5	1.116187139759854	ENOG411CTWI	147900965, Xelaev18042819m.g	GenBank, Xenbase_9.1	dcaf8.S	DDB1- and CUL4-associated factor 8 [Xenopus laevis], NA	Q5TAQ9	DCAF8	H326 WDR42A	DDB1 and CUL4 associated factor 8	0.13217101906200648	0.5785898030282417	FALSE	FALSE	FALSE
ENOG411CQQT	0	0	0	3	0	1.5785269911948188	0	1.447815653783997	0	1.5	1.116187139759854	ENOG411CQQT	148223525, 148225516, Xelaev18032998m.g, Xelaev18030901m.g	GenBank, Xenbase_9.1	ica1.S, ica1.L	islet cell autoantigen 1, 69kDa [Xenopus laevis], NA	Q05084, Q8NDH6	ICA1, ICA1L	NA, ALS2CR14 ALS2CR15	Islet cell autoantigen	0.13217101906200648	0.5785898030282417	FALSE	FALSE	FALSE
ENOG411DFB2	0	0	0	3	0	1.5785269911948188	0	1.447815653783997	0	1.5	1.116187139759854	ENOG411DFB2	124504282, 52354828, 83318389, Xelaev18032551m.g, Xelaev18034138m.g	GenBank, Xenbase_9.1	eppk1.L, Xelaev18034138m.g	LOC494814 protein [Xenopus laevis], NA	NA	NA	NA	Plectin repeat	0.13217101906200648	0.5785898030282417	FALSE	FALSE	FALSE
ENOG411CY0J	0	0	0	3	0	1.5785269911948188	0	1.447815653783997	0	1.5	1.116187139759854	ENOG411CY0J	125705, 125871, 14627130, 148223327, 148228164, 148231247, 148233834, 148236015, 15321731, 214810, 555569, Xelaev18003086m.g, Xelaev18033632m.g, Xelaev18015084m.g	GenBank, Xenbase_9.1	src.L, yes1.S, fgr.S	RecName: Full=Tyrosine-protein kinase Src-2; AltName: Full=p60-Src-2, RecName: Full=Tyrosine-protein kinase Yes; AltName: Full=p61-Yes, fyn protein [Xenopus laevis], similar to Fyn proto-oncogene [Xenopus laevis], tyrosine-protein kinase Src-1 [Xenopus laevis], tyrosine-protein kinase Yes [Xenopus laevis], uncharacterized protein LOC734720 [Xenopus laevis], tyrosine-protein kinase Src-2 [Xenopus …	P07947, P12931	YES1, SRC	YES, SRC1	V-src sarcoma (Schmidt-Ruppin A-2) viral oncogene homolog (Avian)	0.13217101906200648	0.5785898030282417	FALSE	FALSE	FALSE
ENOG411CTSU	0	0	0	3	0	1.5785269911948188	0	1.447815653783997	0	1.5	1.116187139759854	ENOG411CTSU	Xelaev18017669m.g	Xenbase_9.1	iqub.L	NA	Q8NA54	IQUB	NA	IQ motif and ubiquitin domain containing	0.13217101906200648	0.5785898030282417	FALSE	FALSE	FALSE
ENOG411CVMP	0	0	0	3	0	1.5785269911948188	0	1.447815653783997	0	1.5	1.116187139759854	ENOG411CVMP	Xelaev18020028m.g, Xelaev18016929m.g, Xelaev18009276m.g, Xelaev18005547m.g	Xenbase_9.1	tbc1d9b.S, tbc1d9b.L, tbc1d9.S, tbc1d9.L	NA	Q6ZT07, Q66K14	TBC1D9, TBC1D9B	KIAA0882 TBC1D9A, KIAA0676	TBC1 domain family member	0.13217101906200648	0.5785898030282417	FALSE	FALSE	FALSE
ENOG411CZCQ	0	0	0	3	0	1.5785269911948188	0	1.447815653783997	0	1.5	1.116187139759854	ENOG411CZCQ	349501037, 50417742, Xelaev18021666m.g	GenBank, Xenbase_9.1	saal1.L	protein saal1 [Xenopus laevis], MGC80954 protein [Xenopus laevis], NA	Q96ER3	SAAL1	NA	Serum amyloid A-like 1	0.13217101906200648	0.5785898030282417	FALSE	FALSE	FALSE
ENOG411D008	0	0	0	3	0	1.5785269911948188	0	1.447815653783997	0	1.5	1.116187139759854	ENOG411D008	116487886, 159155357, 257096602, 257096603, 50925016, Xelaev18042889m.g	GenBank, Xenbase_9.1	glmp.S	LOC779099 protein [Xenopus laevis], RecName: Full=Lysosomal protein NCU-G1-A; Flags: Precursor, RecName: Full=Lysosomal protein NCU-G1-B; Flags: Precursor, LOC446270 protein [Xenopus laevis], NA	Q8WWB7	GLMP	C1orf85	chromosome 1 open reading frame 85	0.13217101906200648	0.5785898030282417	FALSE	FALSE	FALSE
ENOG411CR0C	0	10	3	15	1.5980745634395823	-0.02308914816441156	1.5432913045507926	-0.011615964853300301	5	9	1.1136828674109838	ENOG411CR0C	163915611, Xelaev18007454m.g	GenBank, Xenbase_9.1	sart3.L	LOC100137683 protein [Xenopus laevis], NA	Q15020	SART3	KIAA0156 TIP110	squamous cell carcinoma antigen recognized by T cells 3	0.13270763089579882	0.5785898030282417	FALSE	FALSE	FALSE
ENOG411CQA0	16	29	33	46	1.3481548971512969	0.22456617108524715	0.5432913045507928	0.09551390985311567	22.5	39.5	1.1120817322650112	ENOG411CQA0	147901713, 148229675, Xelaev18005996m.g, Xelaev18037117m.g	GenBank, Xenbase_9.1	sec31a.L, sec31b.S	MGC86445 protein [Xenopus laevis], SEC31 homolog B [Xenopus laevis], NA	O94979, Q9NQW1	SEC31A, SEC31B	KIAA0905 SEC31L1, SEC31L2	SEC31 homolog B (S. cerevisiae)	0.13305150516997907	0.5785898030282417	FALSE	FALSE	FALSE
ENOG411CQ5B	5	5	8	14	0.2256469257893089	1.3459595017247779	0.12825380527194893	0.7697437486713592	5	11	1.111293562251575	ENOG411CQ5B	12007010, 120577458, 147900119, 148231951, 148234757, 963087, Xelaev18021440m.g, Xelaev18005097m.g, Xelaev18008916m.g, Xelaev18034567m.g, Xelaev18017216m.g, Xelaev18018679m.g	GenBank, Xenbase_9.1	ppp2r2b.S, ppp2r2c.L, Xelaev18008916m.g, ppp2r2d.L, ppp2r2b.L, Xelaev18018679m.g	protein phosphatase 2 regulatory subunit B [Xenopus laevis], Ppp2r2b-a protein [Xenopus laevis], serine/threonine-protein phosphatase 2A 55 kDa regulatory subunit B delta isoform [Xenopus laevis], serine/threonine-protein phosphatase 2A 55 kDa regulatory subunit B beta isoform [Xenopus laevis], protein phosphatase 2, regulatory subunit B, alpha [Xenopus laevis], phosphorylase phosphatase [Xenopus…	Q00005, P63151, Q66LE6, Q9Y2T4	PPP2R2B, PPP2R2A, PPP2R2D, PPP2R2C	NA, KIAA1541	Protein phosphatase 2, regulatory subunit B''	0.13322100477220103	0.5785898030282417	FALSE	FALSE	FALSE
ENOG411CZN5	4	2	7	7	0.3631706119856114	1.2075138712135043	0.22136320966343032	0.8628531530628408	3	7	1.1106416491745825	ENOG411CZN5	114108055	GenBank	NA	MGC154345 protein [Xenopus laevis]	NA	NA	NA	acyl coa dehydrogenase 6-like	0.13336131392130882	0.5785898030282417	FALSE	FALSE	FALSE
ENOG411CVG9	8	18	18	30	1.1965795992079393	0.3647753611545743	0.6212938165520658	0.15408445072728655	13	24	1.1040446803115864	ENOG411CVG9	148236035, Xelaev18025689m.g	GenBank, Xenbase_9.1	eif3l.S	eukaryotic translation initiation factor 3 subunit L [Xenopus laevis], NA	Q9Y262	EIF3L	EIF3EIP EIF3S6IP	Component of the eukaryotic translation initiation factor 3 (eIF-3) complex, which is required for several steps in the initiation of protein synthesis. The eIF-3 complex associates with the 40S ribosome and facilitates the recruitment of eIF-1, eIF-1A, eIF-2 GTP methionyl-tRNAi and eIF-5 to form the 43S preinitiation complex (43S PIC). The eIF-3 complex stimulates mRNA recruitment to the 43S PIC…	0.13478687819244958	0.5785898030282417	FALSE	FALSE	FALSE
ENOG411CVJ8	0	1	2	2	1.3048031678308571	0.2564237478929571	1.1282538052719489	0.032778154505153104	0.5	2	1.1039541390792673	ENOG411CVJ8	147903437, 148226156, 52138889, Xelaev18037252m.g	GenBank, Xenbase_9.1	ssrp1.S	Ras association (RalGDS/AF-6) and pleckstrin homology domains 1 [Xenopus laevis], FACT complex subunit SSRP1 [Xenopus laevis], SSRP1 protein [Xenopus laevis], NA	Q08945	SSRP1	FACT80	Structure specific recognition protein 1	0.1348065160551118	0.5785898030282417	FALSE	FALSE	FALSE
ENOG411CPE4	0	1	2	2	1.3048031678308571	0.2564237478929571	1.1282538052719489	0.032778154505153104	0.5	2	1.1039541390792673	ENOG411CPE4	147901235, Xelaev18000100m.g, Xelaev18003498m.g	GenBank, Xenbase_9.1	Xelaev18000100m.g, Xelaev18003498m.g	syntaxin 7 [Xenopus laevis], NA	O15400	STX7	NA	Syntaxin 7	0.1348065160551118	0.5785898030282417	FALSE	FALSE	FALSE
ENOG411CRB0	0	1	2	2	1.3048031678308571	0.2564237478929571	1.1282538052719489	0.032778154505153104	0.5	2	1.1039541390792673	ENOG411CRB0	148234660	GenBank	NA	uncharacterized protein LOC734750 [Xenopus laevis]	Q9HCN4	GPN1	MBDIN RPAP4 XAB1	GPN-loop GTPase 1	0.1348065160551118	0.5785898030282417	FALSE	FALSE	FALSE
ENOG411CW4W	0	1	2	2	1.3048031678308571	0.2564237478929571	1.1282538052719489	0.032778154505153104	0.5	2	1.1039541390792673	ENOG411CW4W	120538435, 54038705, Xelaev18009951m.g, Xelaev18020553m.g, Xelaev18018304m.g	GenBank, Xenbase_9.1	fkbp8.S, loc100492768.S, loc100492768.L	LOC495188 protein [Xenopus laevis], NA	Q14318	FKBP8	FKBP38	FK506 binding protein 8, 38kDa	0.1348065160551118	0.5785898030282417	FALSE	FALSE	FALSE
ENOG411DEVM	0	1	2	2	1.3048031678308571	0.2564237478929571	1.1282538052719489	0.032778154505153104	0.5	2	1.1039541390792673	ENOG411DEVM	Xelaev18038195m.g	Xenbase_9.1	fkbp15.L	NA	NA	NA	NA	FK506 binding protein 15, 133kDa	0.1348065160551118	0.5785898030282417	FALSE	FALSE	FALSE
ENOG411CU44	10	18	19	33	0.8164199732701317	0.7368894782383912	0.40578778080085787	0.28735098159075084	14	26	1.0983556464428332	ENOG411CU44	147900524, 46249667, Xelaev18037826m.g, Xelaev18036107m.g	GenBank, Xenbase_9.1	aldh16a1.S, aldh16a1.L	aldehyde dehydrogenase 16 family, member A1 [Xenopus laevis], LOC414586 protein [Xenopus laevis], NA	M0QZ58, Q8IZ83	NA, ALDH16A1	NA	Aldehyde dehydrogenase 16 family, member A1	0.1360246109600038	0.5785898030282417	FALSE	FALSE	FALSE
ENOG411CX4B	15	24	24	47	0.3909819825757632	1.1575044067888671	0.18714749432551744	0.3889219647304284	19.5	35.5	1.0949452264948025	ENOG411CX4B	120538240, 148235381, Xelaev18007420m.g, Xelaev18012678m.g, Xelaev18015303m.g, Xelaev18010365m.g	GenBank, Xenbase_9.1	ap1b1.L, ap2b1.L, ap2b1.S, ap1b1.S	LOC100036849 protein [Xenopus laevis], adaptor-related protein complex 2, beta 1 subunit [Xenopus laevis], NA	P63010, Q10567	AP2B1, AP1B1	ADTB2 CLAPB1, ADTB1 BAM22 CLAPB2	Adaptor-related protein complex 1, beta 1 subunit	0.13677031678778914	0.5785898030282417	FALSE	FALSE	FALSE
ENOG411CSRK	3	2	4	9	-0.09451261085055432	1.6418628635537411	-0.1347806005618449	1.1847812479502031	2.5	6.5	1.0941418565571412	ENOG411CSRK	115528345, 148230114, 213623460, Xelaev18006614m.g, Xelaev18001159m.g	GenBank, Xenbase_9.1	gatad2a.L, gatad2a.S	LOC100158394 protein [Xenopus laevis], GATA zinc finger domain containing 2A [Xenopus laevis], Mi-2 histone deacetylase complex protein 66 [Xenopus laevis], NA	Q86YP4	GATAD2A	NA	GATA zinc finger domain containing 2A	0.13694638368001663	0.5785898030282417	FALSE	FALSE	FALSE
ENOG411CPAC	0	1	0	6	0	1.5457697762129996	0	1.2551705758416012	0.5	3	1.093024290913424	ENOG411CPAC	291290949, 50418409, Xelaev18047144m.g, Xelaev18013496m.g, Xelaev18015973m.g, Xelaev18013495m.g, Xelaev18015974m.g, Xelaev18044640m.g	GenBank, Xenbase_9.1	galnt3.S, Xelaev18013496m.g, Xelaev18015973m.g, Xelaev18013495m.g, Xelaev18015974m.g, galnt3.L	UDP-N-acetyl-alpha-D-galactosamine:polypeptide N-acetylgalactosaminyltransferase 6 (GalNAc-T6) [Xenopus laevis], LOC445879 protein [Xenopus laevis], NA	Q14435, Q8NCL4	GALNT3, GALNT6	NA	UDP-N-acetyl-alpha-D-galactosamine polypeptide N-acetylgalactosaminyltransferase	0.13719156734280957	0.5785898030282417	FALSE	FALSE	FALSE
ENOG411CY8Q	3	6	6	14	0.5317988921207091	1.0035860304707585	0.3506462266083967	0.5473513273349114	4.5	10	1.085681090496009	ENOG411CY8Q	Xelaev18021220m.g, Xelaev18017483m.g	Xenbase_9.1	ndufa12.S, ndufa12.L	NA	Q9UI09	NDUFA12	DAP13	NADH dehydrogenase ubiquinone 1 alpha subcomplex 12	0.13881005475295075	0.5785898030282417	FALSE	FALSE	FALSE
ENOG411CU8V	2	7	6	13	1.0284923925464566	0.491467649459639	0.7656837258872404	0.2551705758416011	4.5	9.5	1.0747740528350997	ENOG411CU8V	147900237, Xelaev18041372m.g, Xelaev18039450m.g	GenBank, Xenbase_9.1	eif2b2.S, eif2b2.L	eukaryotic translation initiation factor 2B, subunit 2 beta, 39kDa [Xenopus laevis], NA	P49770	EIF2B2	EIF2BB	Eukaryotic translation initiation factor 2B, subunit 2 beta	0.14123795000009187	0.5785898030282417	FALSE	FALSE	FALSE
ENOG411CX94	7	5	8	18	-0.46836016376056483	1.983624394468825	-0.2867836940068948	1.1107806665064264	6	13	1.071453612823228	ENOG411CX94	Xelaev18026725m.g	Xenbase_9.1	ttc27.L	NA	Q6P3X3	TTC27	NA	Tetratricopeptide repeat domain 27	0.14198275875019054	0.5785898030282417	FALSE	FALSE	FALSE
ENOG411CQ5G	3	5	3	18	-0.47877023982170747	1.983624394468825	-0.45670869544920745	1.1107806665064264	4	10.5	1.0640925774477261	ENOG411CQ5G	Xelaev18026624m.g, Xelaev18028852m.g	Xenbase_9.1	crnkl1.L, crnkl1.S	NA	Q9BZJ0	CRNKL1	CRN	crooked neck pre-mRNA splicing factor-like 1 (Drosophila)	0.14364338151361394	0.5785898030282417	FALSE	FALSE	FALSE
ENOG411CQJT	14	18	26	32	0.8857993089521095	0.6152809875711912	0.3912882111057425	0.24428225969886486	16	29	1.0614240567771394	ENOG411CQJT	117558235, 147899177, Xelaev18002816m.g, Xelaev18023628m.g, Xelaev18025634m.g, Xelaev18018966m.g	GenBank, Xenbase_9.1	loc100488028-like.L, loc101734319.L, loc101734319.S, colgalt1.L	Glt25d1b protein [Xenopus laevis], procollagen galactosyltransferase 1-B precursor [Xenopus laevis], NA	Q8IYK4, Q8NBJ5, Q5T4B2	COLGALT2, COLGALT1, CERCAM	C1orf17 GLT25D2 KIAA0584, GLT25D1, CEECAM1 GLT25D3 KIAA1502	glycosyltransferase 25 domain containing	0.1442486144645549	0.5785898030282417	FALSE	FALSE	FALSE
ENOG411CUEE	5	7	9	16	0.46407031200880344	1.0284956462861423	0.2802568987169987	0.5352784950343363	6	12.5	1.0554035104785537	ENOG411CUEE	117558143, 148232694, 2062660, Xelaev18015737m.g, Xelaev18025680m.g	GenBank, Xenbase_9.1	Xelaev18015737m.g, Xelaev18025680m.g	Unknown (protein for MGC:154793) [Xenopus laevis], RAN GTPase activating protein 1 [Xenopus laevis], RanGTPase activating protein [Xenopus laevis], NA	P46060	RANGAP1	KIAA1835 SD	RAN GTPase activating protein 1	0.1456204090268844	0.5785898030282417	FALSE	FALSE	FALSE
ENOG411CTYE	3	3	6	8	0.5317988921207091	0.9513725520297911	0.3506462266083967	0.6177406552263094	3	7	1.0487605858210634	ENOG411CTYE	57032570, Xelaev18029485m.g	GenBank, Xenbase_9.1	prim2.S	LOC496363 protein [Xenopus laevis], NA	P49643	PRIM2	PRIM2A	primase, DNA, polypeptide 2	0.14714416096273683	0.5785898030282417	FALSE	FALSE	FALSE
ENOG411CUW6	1	4	3	9	0.7272110266705417	0.7455544901221587	0.5432913045507926	0.4478156537839968	2.5	6	1.0414024840218286	ENOG411CUW6	147902014	GenBank	NA	spermidine synthase [Xenopus laevis]	NA	NA	NA	Spermidine synthase	0.1488443950827298	0.5785898030282417	FALSE	FALSE	FALSE
ENOG411DEH7	2	3	5	7	0.7507393534712237	0.7095854272972324	0.5432913045507928	0.447815653783997	2.5	6	1.0326055552161335	ENOG411DEH7	148225851, 148238112, 76779471, Xelaev18042760m.g, Xelaev18040507m.g	GenBank, Xenbase_9.1	hdgf.S, hdgf.L	hepatoma-derived growth factor [Xenopus laevis], uncharacterized protein LOC432316 [Xenopus laevis], Unknown (protein for MGC:130742) [Xenopus laevis], NA	NA	NA	NA	Hepatoma-derived growth factor	0.15089426370151657	0.5785898030282417	FALSE	FALSE	FALSE
ENOG411CX6E	3	8	10	12	1.466247501560375	-0.0206507315514804	1.0027229231880899	-0.021669629517223423	5.5	11	1.0221912789346594	ENOG411CX6E	13431459, Xelaev18018645m.g	GenBank, Xenbase_9.1	pold2.L	RecName: Full=DNA polymerase delta subunit 2; AltName: Full=XlCdc1, NA	P49005	POLD2	NA	polymerase (DNA directed), delta 2, accessory subunit	0.15334518880930428	0.5785898030282417	FALSE	FALSE	FALSE
ENOG411CYPV	3	2	5	7	0.23781991249741732	1.2075138712135043	0.12825380527194893	0.8628531530628408	2.5	6	1.0220053195400034	ENOG411CYPV	147900430, 148224120, 27882648	GenBank	NA	RAB18, member RAS oncogene family [Xenopus laevis], uncharacterized protein LOC379558 [Xenopus laevis], RAB18 protein [Xenopus laevis]	Q9NP72	RAB18	NA	RAB18, member RAS oncogene family	0.15338919134852377	0.5785898030282417	FALSE	FALSE	FALSE
ENOG411CWT8	4	4	6	12	0.08909363321863015	1.3556436331960844	0.028718131721034334	0.8263272770377267	4	9	1.0215835181147603	ENOG411CWT8	148226246	GenBank	NA	replication factor C (activator 1) 3, 38kDa [Xenopus laevis]	P40938	RFC3	NA	Replication factor C (Activator 1) 3, 38kDa	0.1534890308785102	0.5785898030282417	FALSE	FALSE	FALSE
ENOG411CSSA	1	3	3	7	0.7272110266705417	0.7095854272972324	0.5432913045507926	0.447815653783997	2	5	1.0159685157853982	ENOG411CSSA	161611661	GenBank	NA	Echdc3 protein [Xenopus laevis]	Q96DC8	ECHDC3	NA	Enoyl CoA hydratase domain containing 3	0.1548221897710118	0.5785898030282417	FALSE	FALSE	FALSE
ENOG411DD9I	0	2	0	8	0	1.4337719527834107	0	1.032778154505153	1	4	1.013829870488228	ENOG411DD9I	148224494	GenBank	NA	serine/threonine-protein phosphatase PP1-beta catalytic subunit [Xenopus laevis]	P62140	PPP1CB	NA	protein phosphatase 1, catalytic subunit, beta	0.15533196971756488	0.5785898030282417	FALSE	FALSE	FALSE
ENOG411CRNJ	0	2	0	8	0	1.4337719527834107	0	1.032778154505153	1	4	1.013829870488228	ENOG411CRNJ	Xelaev18010156m.g, Xelaev18006937m.g	Xenbase_9.1	naa35.S, naa35.L	NA	Q5VZE5	NAA35	EGAP MAK10	N(Alpha)-acetyltransferase 35, NatC auxiliary subunit	0.15533196971756488	0.5785898030282417	FALSE	FALSE	FALSE
ENOG411CZZ8	2	10	7	16	1.277263054586856	0.15612508977223033	0.9583288038296363	0.07584687639703919	6	11.5	1.0135584769487118	ENOG411CZZ8	148223905, 148224598, Xelaev18021938m.g	GenBank, Xenbase_9.1	ndufs3.L	NADH dehydrogenase (ubiquinone) Fe-S protein 3, 30kDa (NADH-coenzyme Q reductase) [Xenopus laevis], uncharacterized protein LOC495365 [Xenopus laevis], NA	O75489	NDUFS3	NA	NADH dehydrogenase (ubiquinone) Fe-S protein 3, 30kDa (NADH-coenzyme Q reductase)	0.1553967397782932	0.5785898030282417	FALSE	FALSE	FALSE
ENOG411CVBZ	52	94	88	148	1.0915034488332196	0.3410019510520778	0.2911042809539913	0.09712856591521078	73	118	1.0129342823452407	ENOG411CVBZ	148231021, Xelaev18015280m.g, Xelaev18007676m.g, Xelaev18010521m.g	GenBank, Xenbase_9.1	cltc.S, cltcl1.L, cltcl1.S	clathrin, heavy chain (Hc) [Xenopus laevis], NA	Q00610, P53675	CLTC, CLTCL1	CLH17 CLTCL2 KIAA0034, CLH22 CLTCL CLTD	Clathrin, heavy	0.1555457760243639	0.5785898030282417	FALSE	FALSE	FALSE
ENOG411CZSF	1	2	4	4	1.0630801652182171	0.3626466885734892	0.8652193994381551	0.184781247950203	1.5	4	1.0081411264358768	ENOG411CZSF	Xelaev18005278m.g	Xenbase_9.1	scfd2.L	NA	Q8WU76	SCFD2	STXBP1L1	sec1 family domain containing 2	0.15669335824147182	0.5785898030282417	FALSE	FALSE	FALSE
ENOG411CY8A	0	16	5	20	2.06316626569203	-0.6385248327371573	2.128253805271949	-0.24732976468758228	8	12.5	1.0073736180017105	ENOG411CY8A	147903733, 5690335, Xelaev18026522m.g	GenBank, Xenbase_9.1	xpo1.L	exportin 1 (CRM1 homolog) [Xenopus laevis], CRM1/XPO1 protein [Xenopus laevis], NA	O14980	XPO1	CRM1	exportin 1, CRM1 homolog (yeast)	0.1568776321852132	0.5785898030282417	FALSE	FALSE	FALSE
ENOG411CS2Z	4	8	7	18	0.3631706119856114	1.0544835025276784	0.22136320966343032	0.5258181657852701	6	12.5	1.0024328377493574	ENOG411CS2Z	122936396, 148225638, 50415381, Xelaev18036638m.g, Xelaev18034239m.g	GenBank, Xenbase_9.1	casp7.S, casp7.L	LOC100037079 protein [Xenopus laevis], caspase-7 [Xenopus laevis], XCaspase-7 protein [Xenopus laevis], NA	P55210	CASP7	MCH3	Caspase 7, apoptosis-related cysteine peptidase	0.15806729449390636	0.5785898030282417	FALSE	FALSE	FALSE
ENOG411CQZ6	0	5	4	6	1.8453247825788208	-0.4296080710181086	1.8652193994381552	-0.32979192487955516	2.5	5	1.001062886983699	ENOG411CQZ6	124961, 124965, 147905246, 47937577, Xelaev18030727m.g, Xelaev18032868m.g	GenBank, Xenbase_9.1	itgb1.L, itgb1.S	RecName: Full=Integrin beta-1-B; AltName: Full=Integrin beta-1*; Flags: Precursor, RecName: Full=Integrin beta-1-A; Flags: Precursor, integrin beta-1-B precursor [Xenopus laevis], ITGB1 protein [Xenopus laevis], NA	P05556	ITGB1	FNRB MDF2 MSK12	integrin, beta 1 (fibronectin receptor, beta polypeptide, antigen CD29 includes MDF2, MSK12)	0.1583982030785446	0.5785898030282417	FALSE	FALSE	FALSE
ENOG411CU5T	0	5	2	8	1.3048031678308571	0.11038556925868656	1.1282538052719489	0.032778154505153104	2.5	5	1.0006895526548425	ENOG411CU5T	148223485, Xelaev18027101m.g, Xelaev18029182m.g	GenBank, Xenbase_9.1	hbs1l.L, Xelaev18029182m.g	HBS1-like [Xenopus laevis], NA	Q9Y450	HBS1L	HBS1 KIAA1038	Hbs1-like (S. cerevisiae)	0.15848845990243268	0.5785898030282417	FALSE	FALSE	FALSE
ENOG411D476	1	2	3	5	0.7272110266705417	0.6802222002387145	0.5432913045507926	0.447815653783997	1.5	4	0.9952055788147999	ENOG411D476	148230603, 148237592, 285395349, Xelaev18012185m.g	GenBank, Xenbase_9.1	dynll2.L	dynein, light chain, LC8-type 1 [Xenopus laevis], dynein, light chain, LC8-type 2 [Xenopus laevis], NA	Q96FJ2, P63167	DYNLL2, DYNLL1	DLC2, DLC1 DNCL1 DNCLC1 HDLC1	dynein light chain LC8-type	0.15981814451556992	0.5785898030282417	FALSE	FALSE	FALSE
ENOG411CUAI	7	6	11	15	0.22498432077895522	1.1783120496360815	0.12825380527194893	0.6404607317263928	6.5	13	0.9922803795349416	ENOG411CUAI	13540314, 148223119, 148227542, 148227710, Xelaev18043239m.g, Xelaev18046000m.g	GenBank, Xenbase_9.1	pabpc1l.L, pabpc1l.S	embryonic poly(A) binding protein [Xenopus laevis], uncharacterized protein LOC495336 [Xenopus laevis], embryonic polyadenylate-binding protein A [Xenopus laevis], embryonic polyadenylate-binding protein B [Xenopus laevis], NA	Q4VXU2	PABPC1L	C20orf119	poly(A) binding protein, cytoplasmic 1-like	0.1605303858417362	0.5785898030282417	FALSE	FALSE	FALSE
ENOG411CTQ0	4	11	9	20	0.8459472136748417	0.5502194555747453	0.5432913045507926	0.2551705758416011	7.5	14.5	0.9872389194930185	ENOG411CTQ0	1044938, 213623790, Xelaev18004415m.g	GenBank, Xenbase_9.1	ddx6.S	RNA helicase p54 [Xenopus laevis], P54H protein [Xenopus laevis], NA	P26196	DDX6	HLR2 RCK	DEAD (Asp-Glu-Ala-Asp) box helicase 6	0.16176276317387134	0.5785898030282417	FALSE	FALSE	FALSE
ENOG411CZG9	7	10	10	24	0.007682108461226035	1.3872276543331867	0.0027229231880897802	0.6322402249214245	8.5	17	0.9863501524152476	ENOG411CZG9	147904796, 148224323, Xelaev18022777m.g	GenBank, Xenbase_9.1	vps35.L	vacuolar protein sorting 35 homolog [Xenopus laevis], vacuolar protein sorting 35 [Xenopus laevis], NA	Q96QK1	VPS35	MEM3	vacuolar protein sorting 35 homolog (S. cerevisiae)	0.16198065853097612	0.5785898030282417	FALSE	FALSE	FALSE
ENOG411CRWP	5	5	8	13	0.2256469257893089	1.1679945888701622	0.12825380527194893	0.6702080751204449	5	10.5	0.9854533655588033	ENOG411CRWP	147900837, 169642433, Xelaev18013053m.g, Xelaev18038717m.g, Xelaev18042089m.g, Xelaev18015586m.g	GenBank, Xenbase_9.1	cul4a.L, cul4b.L, cul4b.S, cul4a.S	cullin 4B [Xenopus laevis], LOC100158294 protein [Xenopus laevis], NA	Q13620, Q13619	CUL4B, CUL4A	KIAA0695, NA	Cullin 4B	0.16220071375700615	0.5785898030282417	FALSE	FALSE	FALSE
ENOG411CRU2	4	7	7	16	0.3631706119856114	1.0284956462861423	0.22136320966343032	0.5352784950343363	5.5	11.5	0.9840566483724661	ENOG411CRU2	148235168, 54673738, Xelaev18024787m.g, Xelaev18022522m.g, Xelaev18033855m.g	GenBank, Xenbase_9.1	cpne2.S, cpne2-like.L, cpne3.S	copine III [Xenopus laevis], LOC495505 protein [Xenopus laevis], NA	O75131, Q96FN4	CPNE3, CPNE2	CPN3 KIAA0636, NA	copine III	0.16254383029406827	0.5785898030282417	FALSE	FALSE	FALSE
ENOG411CXUZ	5	10	16	13	1.788694668526166	-0.4041974759878818	1.045791645079976	-0.20426104279569623	7.5	14.5	0.9789873533775577	ENOG411CXUZ	148237548	GenBank	NA	primase, DNA, polypeptide 1 (49kDa) [Xenopus laevis]	P49642, A0A3B3ITS8	PRIM1, NA	NA	primase, DNA, polypeptide 1 (49kDa)	0.16379311413786157	0.5785898030282417	FALSE	FALSE	FALSE
ENOG411CX7V	11	26	21	44	0.8712846573341018	0.5090483184913973	0.4177604224669338	0.184781247950203	18.5	32.5	0.9760428075016172	ENOG411CX7V	147900810, Xelaev18045232m.g, Xelaev18047547m.g	GenBank, Xenbase_9.1	eif3b.L, eif3b.S	eukaryotic translation initiation factor 3 subunit B [Xenopus laevis], NA	P55884	EIF3B	EIF3S9	Component of the eukaryotic translation initiation factor 3 (eIF-3) complex, which is involved in protein synthesis and, together with other initiation factors, stimulates binding of mRNA and methionyl-tRNAi to the 40S ribosome (By similarity)	0.1645216256783623	0.5785898030282417	FALSE	FALSE	FALSE
ENOG411CYZW	2	1	2	7	-0.39090272923773745	1.7681752766489778	-0.4567086954492073	1.447815653783997	1.5	4.5	0.9738787578165587	ENOG411CYZW	Xelaev18005032m.g, Xelaev18008868m.g	Xenbase_9.1	letm1.L, letm1.S	NA	O95202	LETM1	NA	leucine zipper-EF-hand containing transmembrane protein 1	0.16505837103874313	0.5785898030282417	FALSE	FALSE	FALSE
ENOG411CUF1	4	18	11	28	1.2640953928779595	0.10377565925305662	0.8063257103845864	0.057869135467983404	11	19.5	0.9672308967506188	ENOG411CUF1	148226779, 148227269, 148229128, 66911555, Xelaev18040094m.g, Xelaev18040095m.g, Xelaev18024204m.g, Xelaev18022251m.g, Xelaev18002694m.g, Xelaev18002696m.g	GenBank, Xenbase_9.1	Xelaev18040094m.g, mta1.L, mta2.S, mta2.L, Xelaev18002694m.g, mta1.S	uncharacterized protein LOC734243 [Xenopus laevis], metastasis associated 1 family, member 2 [Xenopus laevis], metastasis associated 1 [Xenopus laevis], Mta2 protein [Xenopus laevis], NA	Q13330, O94776, Q9BTC8	MTA1, MTA2, MTA3	NA, MTA1L1 PID, KIAA1266	Metastasis associated 1	0.16671430997704342	0.5785898030282417	FALSE	FALSE	FALSE
ENOG411CT9J	0	3	1	6	0.9226215573892205	0.4441603850723741	0.5432913045507926	0.2551705758416011	1.5	3.5	0.9664607799179151	ENOG411CT9J	148223970, Xelaev18013544m.g, Xelaev18044788m.g, Xelaev18047244m.g	GenBank, Xenbase_9.1	nckap1l.L, nckap1.L, nckap1.S	nck-associated protein 1 [Xenopus laevis], NA	Q9Y2A7, P55160	NCKAP1, NCKAP1L	HEM2 KIAA0587 NAP1, HEM1	Nck-associated protein	0.1669068315590481	0.5785898030282417	FALSE	FALSE	FALSE
ENOG411DCAX	0	3	1	6	0.9226215573892205	0.4441603850723741	0.5432913045507926	0.2551705758416011	1.5	3.5	0.9664607799179151	ENOG411DCAX	1352104, 147903901, 148224207, 1580935, 32484257, 56970672, Xelaev18000835m.g, Xelaev18019129m.g, Xelaev18000834m.g, Xelaev18019130m.g, Xelaev18019128m.g, Xelaev18000836m.g	GenBank, Xenbase_9.1	loc100492293.S, c3.L, loc101730883.S, loc100492966.L, Xetrov90009873m.L, c3.S	RecName: Full=Complement C3, complement C3 [Xenopus laevis], uncharacterized protein LOC495206 [Xenopus laevis], complement C3, C3 protein [Xenopus laevis], NA	NA	NA	NA	complement C3-like	0.1669068315590481	0.5785898030282417	FALSE	FALSE	FALSE
ENOG411CRVB	0	3	1	6	0.9226215573892205	0.4441603850723741	0.5432913045507926	0.2551705758416011	1.5	3.5	0.9664607799179151	ENOG411CRVB	148224878, Xelaev18005850m.g, Xelaev18009519m.g	GenBank, Xenbase_9.1	nup54.L, nup54.S	nucleoporin 54kDa [Xenopus laevis], NA	Q7Z3B4	NUP54	NA	Nucleoporin 54kDa	0.1669068315590481	0.5785898030282417	FALSE	FALSE	FALSE
ENOG411CQSG	2	1	3	5	0.06299406474440446	1.297537405746528	-0.041671196170363696	1.032778154505153	1.5	4	0.9620410288018435	ENOG411CQSG	13959688, 13959700, 147899750, 148237695, 1587180, 34785881, 54261625, Xelaev18023091m.g, Xelaev18008243m.g, Xelaev18025208m.g, Xelaev18003638m.g	GenBank, Xenbase_9.1	kif2c.L, kif2a.L, kif2c.S, kif2a.S	RecName: Full=Kinesin-like protein KIF2C; AltName: Full=Kinesin central motor 1; Short=xKCM1, RecName: Full=Kinesin-like protein KIF2A; AltName: Full=Kinesin-related protein xKIF2, kinesin-like protein KIF2A [Xenopus laevis], MGC80500 protein [Xenopus laevis], kinesin-related protein, Kif2-A-prov protein [Xenopus laevis], NA	O00139, Q99661	KIF2A, KIF2C	KIF2 KNS2, KNSL6	Kinesin heavy chain member 2A	0.1680144973302557	0.5785898030282417	FALSE	FALSE	FALSE
ENOG411CSAZ	9	9	16	18	0.5882847238900292	0.7694197158141363	0.30882605091376963	0.37381507234021993	9	17	0.9600420161618974	ENOG411CSAZ	1143703, 148230509, Xelaev18019995m.g, Xelaev18019773m.g	GenBank, Xenbase_9.1	Xelaev18019995m.g, Xelaev18019773m.g	protein phosphatase 2A, catalytic subunit, beta isoform [Xenopus laevis], protein phosphatase 2, catalytic subunit, alpha isozyme [Xenopus laevis], NA	P67775, P62714	PPP2CA, PPP2CB	NA	serine threonine-protein phosphatase	0.1685170345506982	0.5785898030282417	FALSE	FALSE	FALSE
ENOG411CT17	17	39	31	64	0.9058629198770092	0.44990233127150736	0.3733663031084804	0.1482553719250891	28	47.5	0.9586708027841987	ENOG411CT17	148234472, 267844922, 28422233, Xelaev18015459m.g	GenBank, Xenbase_9.1	prps2.S	ribose-phosphate pyrophosphokinase 2 [Xenopus laevis], phosphoribosyl pyrophosphate synthetase 1 [Xenopus laevis], Prps1 protein [Xenopus laevis], NA	P60891, P11908	PRPS1, PRPS2	NA	Ribose-phosphate pyrophosphokinase	0.1688623058229181	0.5785898030282417	FALSE	FALSE	FALSE
ENOG411CXJU	2	0	4	1	0.43419275757670456	0.911348329855701	0.2802568987169987	0.447815653783997	1	2.5	0.9514412272885752	ENOG411CXJU	147904060, Xelaev18040064m.g	GenBank, Xenbase_9.1	loc100216173.L	protein-L-isoaspartate(D-aspartate)O-methyltransferase [Xenopus laevis], NA	NA	NA	NA	protein-L-isoaspartate O-methyltransferase	0.1706902201403944	0.5785898030282417	FALSE	FALSE	FALSE
ENOG411D0S5	3	0	3	4	-0.47877023982170747	1.822740620542688	-0.45670869544920745	1.7697437486713592	1.5	3.5	0.9503305699216712	ENOG411D0S5	147899521, 49119445, 71679876, 992622, Xelaev18014266m.g	GenBank, Xenbase_9.1	gabpa.S	GA binding protein transcription factor, alpha subunit 60kDa [Xenopus laevis], Unknown (protein for IMAGE:5156648) [Xenopus laevis], Unknown (protein for MGC:115069) [Xenopus laevis], XrpFIalpha [Xenopus laevis], NA	Q06546	GABPA	E4TF1A	GA binding protein transcription factor, alpha subunit 60kDa	0.17097215521350567	0.5785898030282417	FALSE	FALSE	FALSE
ENOG411CV8A	4	10	9	18	0.8459472136748417	0.4949804041245136	0.5432913045507926	0.23631154859028514	7	13.5	0.9481790116262472	ENOG411CV8A	148223219, 34536536, Xelaev18010061m.g	GenBank, Xenbase_9.1	tyrp1.S	tyrosinase-related protein 1 precursor [Xenopus laevis], tyrosinase-related protein 1 [Xenopus laevis], NA	P17643	TYRP1	CAS2 TYRP TYRRP	Tyrosinase-related protein 1	0.17151916503965536	0.5785898030282417	FALSE	FALSE	FALSE
ENOG411CSG3	16	24	27	43	0.5942999768988847	0.7459253893556163	0.2631833853580575	0.26339108264656946	20	35	0.9476824447967819	ENOG411CSG3	147906027, Xelaev18004807m.g, Xelaev18008826m.g	GenBank, Xenbase_9.1	suclg1.L, suclg1.S	succinate-CoA ligase, alpha subunit [Xenopus laevis], NA	P53597	SUCLG1	NA	succinate-CoA ligase, alpha subunit	0.17164557031404076	0.5785898030282417	FALSE	FALSE	FALSE
ENOG411CV76	8	17	14	32	0.5136841921403049	0.8185365281860879	0.28025689871699905	0.32228477170013786	12.5	23	0.9420223053800192	ENOG411CV76	148230575, 28278769	GenBank	NA	NADH dehydrogenase (ubiquinone) 1 alpha subcomplex, 9, 39kDa [Xenopus laevis], MGC64316 protein [Xenopus laevis]	Q16795	NDUFA9	NDUFS2L	NADH dehydrogenase (Ubiquinone) 1 alpha subcomplex	0.17309061008178586	0.5785898030282417	FALSE	FALSE	FALSE
ENOG411CX6V	1	1	2	4	0.3070070547330004	1.0137891149830645	0.12825380527194893	0.7697437486713592	1	3	0.9339439281714474	ENOG411CX6V	148232288, Xelaev18031302m.g	GenBank, Xenbase_9.1	lztfl1.L	leucine zipper transcription factor-like 1 [Xenopus laevis], NA	Q9NQ48	LZTFL1	NA	Leucine zipper transcription factor-like 1	0.17516640876695808	0.5785898030282417	FALSE	FALSE	FALSE
ENOG411CV57	0	0	2	0	1.3048031678308571	0	1.1282538052719489	0	0	1	0.9226351680868878	ENOG411CV57	147898532, Xelaev18027913m.g, Xelaev18029951m.g	GenBank, Xenbase_9.1	trip12.L, trip12.S	uncharacterized protein LOC414478 [Xenopus laevis], NA	Q14669	TRIP12	KIAA0045 ULF	thyroid hormone receptor interactor 12	0.17809868103761595	0.5785898030282417	FALSE	FALSE	FALSE
ENOG411CT0H	0	0	2	0	1.3048031678308571	0	1.1282538052719489	0	0	1	0.9226351680868878	ENOG411CT0H	12057014, 12584083, Xelaev18020566m.g, Xelaev18018293m.g	GenBank, Xenbase_9.1	tp53bp1.S, tp53bp1.L	53BP1 protein [Xenopus laevis], p53-binding protein 1 [Xenopus laevis], NA	NA	NA	NA	Tumor protein p53 binding protein 1	0.17809868103761595	0.5785898030282417	FALSE	FALSE	FALSE
ENOG411DFB8	0	0	2	0	1.3048031678308571	0	1.1282538052719489	0	0	1	0.9226351680868878	ENOG411DFB8	54037970, Xelaev18045604m.g, Xelaev18047829m.g	GenBank, Xenbase_9.1	ppl.L, ppl.S	LOC495053 protein [Xenopus laevis], NA	NA	NA	NA	Periplakin	0.17809868103761595	0.5785898030282417	FALSE	FALSE	FALSE
ENOG411CR9W	0	0	2	0	1.3048031678308571	0	1.1282538052719489	0	0	1	0.9226351680868878	ENOG411CR9W	147902637, 147906757, 257471786, 31615485, 58701967, 83755022, Xelaev18037506m.g, Xelaev18035651m.g, Xelaev18029558m.g, Xelaev18019661m.g, Xelaev18027442m.g	GenBank, Xenbase_9.1	dvl1.S, dvl1.L, dvl3.S, dvl2.L, dvl3.L	segment polarity protein dishevelled homolog DVL-3 [Xenopus laevis], segment polarity protein dishevelled homolog DVL-2 [Xenopus laevis], Chain A, Dishevelled Pdz Domain Homodimer, Chain A, Xenopus Dishevelled Pdz Domain, Xdsh protein [Xenopus laevis], Chain A, Crystal Structure Of Monomeric Uncomplexed Form Of Xenopus Dishevelled Pdz Domain, NA	Q92997, O14640, O14641, P54792	DVL3, DVL1, DVL2, DVL1P1	KIAA0208, NA, DVL DVL1 DVL1L1	dishevelled, dsh homolog	0.17809868103761595	0.5785898030282417	FALSE	FALSE	FALSE
ENOG411CV86	0	0	2	0	1.3048031678308571	0	1.1282538052719489	0	0	1	0.9226351680868878	ENOG411CV86	148224901, Xelaev18017621m.g	GenBank, Xenbase_9.1	znf277.L	zinc finger protein 277 [Xenopus laevis], NA	Q9NRM2	ZNF277	NRIF4 ZNF277P	zinc finger protein 277	0.17809868103761595	0.5785898030282417	FALSE	FALSE	FALSE
ENOG411CV26	0	0	2	0	1.3048031678308571	0	1.1282538052719489	0	0	1	0.9226351680868878	ENOG411CV26	166216084, 49118649	GenBank	NA	RecName: Full=Protein canopy homolog 3; Flags: Precursor, Cnpy3 protein [Xenopus laevis]	Q9BT09	CNPY3	CTG4A ERDA5 PRAT4A TNRC5	Canopy 3 homolog (Zebrafish)	0.17809868103761595	0.5785898030282417	FALSE	FALSE	FALSE
ENOG411CPHG	0	0	2	0	1.3048031678308571	0	1.1282538052719489	0	0	1	0.9226351680868878	ENOG411CPHG	148228315	GenBank	NA	galactosidase, alpha precursor [Xenopus laevis]	P06280	GLA	NA	Galactosidase, alpha	0.17809868103761595	0.5785898030282417	FALSE	FALSE	FALSE
ENOG411CWFH	0	0	2	0	1.3048031678308571	0	1.1282538052719489	0	0	1	0.9226351680868878	ENOG411CWFH	148921623, Xelaev18008361m.g, Xelaev18011017m.g	GenBank, Xenbase_9.1	nadk2.L, nadk2.S	LOC100101328 protein [Xenopus laevis], NA	Q4G0N4	NADK2	C5orf33 MNADK NADKD1	NAD kinase domain containing 1	0.17809868103761595	0.5785898030282417	FALSE	FALSE	FALSE
ENOG411CUNI	0	0	2	0	1.3048031678308571	0	1.1282538052719489	0	0	1	0.9226351680868878	ENOG411CUNI	Xelaev18018607m.g, Xelaev18020290m.g	Xenbase_9.1	usp39.L, usp39.S	NA	Q53GS9	USP39	NA	ubiquitin specific peptidase 39	0.17809868103761595	0.5785898030282417	FALSE	FALSE	FALSE
ENOG411CPHD	0	0	2	0	1.3048031678308571	0	1.1282538052719489	0	0	1	0.9226351680868878	ENOG411CPHD	111146889, 147901498, 148223651, 148234823, 162287318, 213623434, 214917, 214919, 214921, 258967, 450195, Xelaev18038230m.g, Xelaev18041474m.g, Xelaev18041473m.g, Xelaev18041475m.g	GenBank, Xenbase_9.1	pou5f3.3.L, pou5f3.2.S, pou5f3.3.S, pou5f3.1.S	POU class V protein Oct-25 [Xenopus laevis], POU class V protein oct-25 [Xenopus laevis], POU class V protein oct-60 [Xenopus laevis], POU class V protein oct-91 [Xenopus laevis], MGC86493 protein [Xenopus laevis], Xoct-91 protein [Xenopus laevis], XOCT-25 [Xenopus laevis], XOCT-60 [Xenopus laevis], XOCT-79 [Xenopus laevis], XLPOU91=POU domain protein [Xenopus laevis, stage 11 embryos, Peptide Pa…	Q01860, Q06416	POU5F1, POU5F1B	OCT3 OCT4 OTF3, OCT4PG1 OTF3C OTF3P1 POU5F1P1 POU5FLC20 POU5FLC8	POU domain class 5, transcription factor	0.17809868103761595	0.5785898030282417	FALSE	FALSE	FALSE
ENOG411CSWF	0	0	2	0	1.3048031678308571	0	1.1282538052719489	0	0	1	0.9226351680868878	ENOG411CSWF	148230440, Xelaev18018113m.g, Xelaev18020722m.g, Xelaev18006938m.g, Xelaev18010157m.g	GenBank, Xenbase_9.1	loc100485898-like.L, loc100485898-like.S, golm1.L, golm1.S	golgi membrane protein 1 [Xenopus laevis], NA	Q8NBJ4	GOLM1	C9orf155 GOLPH2	Golgi membrane protein 1	0.17809868103761595	0.5785898030282417	FALSE	FALSE	FALSE
ENOG411CVXY	0	0	2	0	1.3048031678308571	0	1.1282538052719489	0	0	1	0.9226351680868878	ENOG411CVXY	147902006, Xelaev18031643m.g, Xelaev18027342m.g	GenBank, Xenbase_9.1	mak.L, ick.L	male germ cell-associated kinase [Xenopus laevis], NA	P20794, Q9UPZ9	MAK, ICK	NA, KIAA0936	Male germ cell-associated kinase	0.17809868103761595	0.5785898030282417	FALSE	FALSE	FALSE
ENOG411CQRR	0	0	2	0	1.3048031678308571	0	1.1282538052719489	0	0	1	0.9226351680868878	ENOG411CQRR	Xelaev18012635m.g	Xenbase_9.1	trit1.L	NA	Q9H3H1	TRIT1	IPT MOD5	tRNA isopentenyltransferase 1	0.17809868103761595	0.5785898030282417	FALSE	FALSE	FALSE
ENOG411CWDS	0	0	2	0	1.3048031678308571	0	1.1282538052719489	0	0	1	0.9226351680868878	ENOG411CWDS	Xelaev18047488m.g, Xelaev18045138m.g	Xenbase_9.1	clec16a.S, clec16a.L	NA	Q2KHT3	CLEC16A	KIAA0350	C-type lectin domain family 16, member A	0.17809868103761595	0.5785898030282417	FALSE	FALSE	FALSE
ENOG411D475	0	0	2	0	1.3048031678308571	0	1.1282538052719489	0	0	1	0.9226351680868878	ENOG411D475	147902208, Xelaev18033411m.g	GenBank, Xenbase_9.1	lyrm4.S	LYR motif-containing protein 4 [Xenopus laevis], NA	Q9HD34	LYRM4	C6orf149 ISD11	LYR motif containing 4	0.17809868103761595	0.5785898030282417	FALSE	FALSE	FALSE
ENOG411CRB6	0	0	2	0	1.3048031678308571	0	1.1282538052719489	0	0	1	0.9226351680868878	ENOG411CRB6	148229693, 37791449, Xelaev18020964m.g, Xelaev18012323m.g, Xelaev18017788m.g	GenBank, Xenbase_9.1	ptpn12.S, ptpn22-like.1.L, ptpn12.L	protein tyrosine phosphatase, non-receptor type 12 [Xenopus laevis], protein tyrosine phosphatase PTP-PEST [Xenopus laevis], NA	Q05209, Q9Y2R2	PTPN12, PTPN22	NA, PTPN8	Protein tyrosine phosphatase, non-receptor type	0.17809868103761595	0.5785898030282417	FALSE	FALSE	FALSE
ENOG411CU3M	0	0	2	0	1.3048031678308571	0	1.1282538052719489	0	0	1	0.9226351680868878	ENOG411CU3M	115528267	GenBank	NA	LOC100158346 protein [Xenopus laevis]	Q9UPT5	EXOC7	EXO70 KIAA1067	exocyst complex component 7	0.17809868103761595	0.5785898030282417	FALSE	FALSE	FALSE
ENOG411D0I4	0	0	2	0	1.3048031678308571	0	1.1282538052719489	0	0	1	0.9226351680868878	ENOG411D0I4	12743942, Xelaev18037800m.g	GenBank, Xenbase_9.1	bax.S	bax [Xenopus laevis], NA	Q07812	BAX	BCL2L4	Bcl2-associated X protein	0.17809868103761595	0.5785898030282417	FALSE	FALSE	FALSE
ENOG411CXDV	0	0	2	0	1.3048031678308571	0	1.1282538052719489	0	0	1	0.9226351680868878	ENOG411CXDV	120537396, 67678018, Xelaev18042594m.g	GenBank, Xenbase_9.1	supt5h.S	LOC733281 protein [Xenopus laevis], NA	O00267	SUPT5H	SPT5 SPT5H	Suppressor of Ty 5 homolog (S. cerevisiae)	0.17809868103761595	0.5785898030282417	FALSE	FALSE	FALSE
ENOG411CP9I	0	0	2	0	1.3048031678308571	0	1.1282538052719489	0	0	1	0.9226351680868878	ENOG411CP9I	18139834, Xelaev18039950m.g, Xelaev18041041m.g	GenBank, Xenbase_9.1	baz1a.L, baz1a.S	ATP-utilizing chromatin assembly factor 1 [Xenopus laevis], NA	Q9NRL2	BAZ1A	ACF1 WCRF180	Bromodomain adjacent to zinc finger domain, 1A	0.17809868103761595	0.5785898030282417	FALSE	FALSE	FALSE
ENOG411DAJB	0	0	2	0	1.3048031678308571	0	1.1282538052719489	0	0	1	0.9226351680868878	ENOG411DAJB	147904326, Xelaev18019905m.g	GenBank, Xenbase_9.1	ikbip.S	IKBKB interacting protein [Xenopus laevis], NA	NA	NA	NA	Inherit from opiNOG: IKBKB interacting protein	0.17809868103761595	0.5785898030282417	FALSE	FALSE	FALSE
ENOG411CTI7	0	0	2	0	1.3048031678308571	0	1.1282538052719489	0	0	1	0.9226351680868878	ENOG411CTI7	Xelaev18025938m.g, Xelaev18024040m.g	Xenbase_9.1	usp19.S, usp19.L	NA	O94966	USP19	KIAA0891 ZMYND9	ubiquitin specific peptidase 19	0.17809868103761595	0.5785898030282417	FALSE	FALSE	FALSE
ENOG411CX4D	0	0	2	0	1.3048031678308571	0	1.1282538052719489	0	0	1	0.9226351680868878	ENOG411CX4D	147903317, Xelaev18026748m.g	GenBank, Xenbase_9.1	rab32.L	RAB32, member RAS oncogene family [Xenopus laevis], NA	Q13637	RAB32	NA	RAB32, member RAS oncogene family	0.17809868103761595	0.5785898030282417	FALSE	FALSE	FALSE
ENOG411CT7R	0	0	2	0	1.3048031678308571	0	1.1282538052719489	0	0	1	0.9226351680868878	ENOG411CT7R	147902266, 148234873, Xelaev18004742m.g	GenBank, Xenbase_9.1	sec62.S	MGC82698 protein [Xenopus laevis], SEC62 homolog [Xenopus laevis], NA	Q99442	SEC62	TLOC1	SEC62 homolog (S. cerevisiae)	0.17809868103761595	0.5785898030282417	FALSE	FALSE	FALSE
ENOG411CX6P	0	0	2	0	1.3048031678308571	0	1.1282538052719489	0	0	1	0.9226351680868878	ENOG411CX6P	147904206, Xelaev18041693m.g, Xelaev18002833m.g	GenBank, Xenbase_9.1	ikbkg.S, ikbkg.L	inhibitor of kappa light polypeptide gene enhancer in B-cells, kinase gamma [Xenopus laevis], NA	Q9Y6K9	IKBKG	FIP3 NEMO	Inhibitor of kappa light polypeptide gene enhancer in B-cells, kinase gamma	0.17809868103761595	0.5785898030282417	FALSE	FALSE	FALSE
ENOG411D5MQ	0	0	2	0	1.3048031678308571	0	1.1282538052719489	0	0	1	0.9226351680868878	ENOG411D5MQ	Xelaev18035196m.g, Xelaev18004687m.g, Xelaev18033301m.g, Xelaev18038593m.g, Xelaev18033364m.g, Xelaev18022404m.g, Xelaev18026514m.g, Xelaev18017143m.g, Xelaev18038588m.g, Xelaev18019156m.g, Xelaev18022587m.g, Xelaev18031347m.g, Xelaev18023428m.g, Xelaev18038911m.g, Xelaev18015743m.g, Xelaev18004117m.g, Xelaev18029152m.g, Xelaev18008708m.g, Xelaev18022419m.g, Xelaev18000164m.g, Xelaev18009524m.g, …	Xenbase_9.1	None	NA	NA	NA	NA	L1 transposable element	0.17809868103761595	0.5785898030282417	FALSE	FALSE	FALSE
ENOG411CTAD	0	0	2	0	1.3048031678308571	0	1.1282538052719489	0	0	1	0.9226351680868878	ENOG411CTAD	Xelaev18030067m.g, Xelaev18028023m.g	Xenbase_9.1	kidins220.S, kidins220.L	NA	Q9ULH0	KIDINS220	ARMS KIAA1250	kinase D-interacting substrate	0.17809868103761595	0.5785898030282417	FALSE	FALSE	FALSE
ENOG411CQQB	0	0	2	0	1.3048031678308571	0	1.1282538052719489	0	0	1	0.9226351680868878	ENOG411CQQB	114108290, 148222154, 148228837, 49119075, Xelaev18020176m.g	GenBank, Xenbase_9.1	gpat4.S	MGC154408 protein [Xenopus laevis], 1-acylglycerol-3-phosphate O-acyltransferase 6 (lysophosphatidic acid acyltransferase, zeta) [Xenopus laevis], glycerol-3-phosphate acyltransferase 3 [Xenopus laevis], LOC443578 protein [Xenopus laevis], NA	Q86UL3, Q53EU6	GPAT4, GPAT3	AGPAT6 TSARG7, AGPAT9 MAG1	1-acylglycerol-3-phosphate O-acyltransferase 6 (lysophosphatidic acid acyltransferase, zeta)	0.17809868103761595	0.5785898030282417	FALSE	FALSE	FALSE
ENOG411D0Z3	0	0	2	0	1.3048031678308571	0	1.1282538052719489	0	0	1	0.9226351680868878	ENOG411D0Z3	147905153, Xelaev18008003m.g, Xelaev18010772m.g	GenBank, Xenbase_9.1	dcp2.L, dcp2.S	DCP2 decapping enzyme homolog [Xenopus laevis], NA	Q8IU60	DCP2	NUDT20	Dcp2 decapping enzyme homolog (S. cerevisiae)	0.17809868103761595	0.5785898030282417	FALSE	FALSE	FALSE
ENOG411CQ2T	1	0	1	3	-0.2764018151375699	1.5785269911948188	-0.45670869544920745	1.447815653783997	0.5	2	0.9207415419438078	ENOG411CQ2T	117558139, 118763666, 48735147, Xelaev18010281m.g, Xelaev18033747m.g, Xelaev18032051m.g, Xelaev18022507m.g, Xelaev18007308m.g	GenBank, Xenbase_9.1	chd8.S, chd7-like.S, chd7-like.L, chd9.L, chd8.L	LOC443577 protein [Xenopus laevis], NA	Q9P2D1, Q3L8U1, Q9HCK8	CHD7, CHD9, CHD8	KIAA1416, KIAA0308 KISH2 PRIC320, HELSNF1 KIAA1564	Chromodomain helicase DNA binding protein	0.17859269095692035	0.5785898030282417	FALSE	FALSE	FALSE
ENOG411D0BD	1	0	1	3	-0.2764018151375699	1.5785269911948188	-0.45670869544920745	1.447815653783997	0.5	2	0.9207415419438078	ENOG411D0BD	148228663, Xelaev18044052m.g	GenBank, Xenbase_9.1	nup85.L	nuclear pore complex protein Nup85 [Xenopus laevis], NA	Q9BW27	NUP85	NUP75 PCNT1	Nucleoporin 85kDa	0.17859269095692035	0.5785898030282417	FALSE	FALSE	FALSE
ENOG411CRT1	0	1	0	5	0	1.297537405746528	0	1.032778154505153	0.5	2.5	0.9174974984465707	ENOG411CRT1	148237727, 16903096, 3047240, Xelaev18033482m.g, Xelaev18031694m.g, Xelaev18033159m.g	GenBank, Xenbase_9.1	nup153.S, nup153.L, Xelaev18033159m.g	nucleoporin Nup153 [Xenopus laevis], nucleoporin Nup153 homolog [Xenopus laevis], NA	P49790	NUP153	NA	Nucleoporin 153kDa	0.1794410015856617	0.5785898030282417	FALSE	FALSE	FALSE
ENOG411CYJ4	0	1	0	5	0	1.297537405746528	0	1.032778154505153	0.5	2.5	0.9174974984465707	ENOG411CYJ4	148222252, 51258380, Xelaev18007410m.g	GenBank, Xenbase_9.1	MGC107841.L	uncharacterized protein LOC446287 [Xenopus laevis], LOC446287 protein [Xenopus laevis], NA	NA	NA	NA	acyl-CoA dehydrogenase AidB-like	0.1794410015856617	0.5785898030282417	FALSE	FALSE	FALSE
ENOG411CPNN	0	1	0	5	0	1.297537405746528	0	1.032778154505153	0.5	2.5	0.9174974984465707	ENOG411CPNN	147904930, 148224600, 189029219, 76779622, Xelaev18008204m.g	GenBank, Xenbase_9.1	mtx3.L	metaxin 1 [Xenopus laevis], metaxin-3 [Xenopus laevis], RecName: Full=Metaxin-3; Short=xMTX3, LOC407751 protein [Xenopus laevis], NA	Q13505, Q5HYI7	MTX1, MTX3	MTX MTXN, NA	Metaxin 3	0.1794410015856617	0.5785898030282417	FALSE	FALSE	FALSE
ENOG411CSHA	0	1	0	5	0	1.297537405746528	0	1.032778154505153	0.5	2.5	0.9174974984465707	ENOG411CSHA	147898771, Xelaev18025901m.g	GenBank, Xenbase_9.1	eefsec.S	eukaryotic elongation factor, selenocysteine-tRNA-specific [Xenopus laevis], NA	P57772	EEFSEC	SELB	Eukaryotic elongation factor, selenocysteine-tRNA-specific	0.1794410015856617	0.5785898030282417	FALSE	FALSE	FALSE
ENOG411DGFG	0	1	0	5	0	1.297537405746528	0	1.032778154505153	0.5	2.5	0.9174974984465707	ENOG411DGFG	Xelaev18012803m.g	Xenbase_9.1	mybbp1a.L	NA	NA	NA	NA	MYB binding protein (P160) 1a	0.1794410015856617	0.5785898030282417	FALSE	FALSE	FALSE
ENOG411CZWD	0	1	0	5	0	1.297537405746528	0	1.032778154505153	0.5	2.5	0.9174974984465707	ENOG411CZWD	Xelaev18033098m.g, Xelaev18031023m.g	Xenbase_9.1	ankrd28.S, ankrd28.L	NA	O15084	ANKRD28	KIAA0379	ankyrin repeat domain 28	0.1794410015856617	0.5785898030282417	FALSE	FALSE	FALSE
ENOG411CT7K	0	1	0	5	0	1.297537405746528	0	1.032778154505153	0.5	2.5	0.9174974984465707	ENOG411CT7K	1333645, 13992583, 147900670, 147901612, Xelaev18011112m.g, Xelaev18008466m.g, Xelaev18020422m.g	GenBank, Xenbase_9.1	smad2.S, smad2.L, smad3.S	Mad2 [Xenopus laevis], SMAD3 [Xenopus laevis], SMAD family member 2 [Xenopus laevis], Mad2 protein [Xenopus laevis], NA	Q15796, P84022	SMAD2, SMAD3	MADH2 MADR2, MADH3	SMAD family member	0.1794410015856617	0.5785898030282417	FALSE	FALSE	FALSE
ENOG411CQPV	0	1	0	5	0	1.297537405746528	0	1.032778154505153	0.5	2.5	0.9174974984465707	ENOG411CQPV	147901047, Xelaev18023486m.g	GenBank, Xenbase_9.1	cdc73.L	cell division cycle 73, Paf1/RNA polymerase II complex component, homolog [Xenopus laevis], NA	Q6P1J9	CDC73	C1orf28 HRPT2	cell division cycle 73, Paf1 RNA polymerase II complex component, homolog (S. cerevisiae)	0.1794410015856617	0.5785898030282417	FALSE	FALSE	FALSE
ENOG411CZDZ	0	1	0	5	0	1.297537405746528	0	1.032778154505153	0.5	2.5	0.9174974984465707	ENOG411CZDZ	148223872, 148236595, Xelaev18031911m.g, Xelaev18033652m.g	GenBank, Xenbase_9.1	riok3.L, riok3.S	RIO kinase 3 [Xenopus laevis], NA	O14730	RIOK3	SUDD	RIO kinase 3 (Yeast)	0.1794410015856617	0.5785898030282417	FALSE	FALSE	FALSE
ENOG411CQUI	0	1	0	5	0	1.297537405746528	0	1.032778154505153	0.5	2.5	0.9174974984465707	ENOG411CQUI	147902738, Xelaev18020855m.g	GenBank, Xenbase_9.1	calu.S	calumenin precursor [Xenopus laevis], NA	O43852	CALU	NA	Calumenin	0.1794410015856617	0.5785898030282417	FALSE	FALSE	FALSE
ENOG411CUJC	0	2	2	3	1.3048031678308571	-0.010324120500485229	1.1282538052719489	-0.1371468469371592	1	2.5	0.9153349124712078	ENOG411CUJC	147899159, 148234176, 27924223, Xelaev18028865m.g, Xelaev18026608m.g	GenBank, Xenbase_9.1	rrbp1.S, rrbp1.L	MGC82852 protein [Xenopus laevis], ribosome-binding protein 1 [Xenopus laevis], MGC68897 protein [Xenopus laevis], NA	Q9P2E9	RRBP1	KIAA1398	ribosome binding protein 1 homolog 180kDa (dog)	0.18000791812739103	0.5785898030282417	FALSE	FALSE	FALSE
ENOG411CWZ3	0	2	2	3	1.3048031678308571	-0.010324120500485229	1.1282538052719489	-0.1371468469371592	1	2.5	0.9153349124712078	ENOG411CWZ3	Xelaev18002535m.g	Xenbase_9.1	bcl2l13.L	NA	Q9BXK5	BCL2L13	MIL1	BCL2-like 13 (Apoptosis facilitator)	0.18000791812739103	0.5785898030282417	FALSE	FALSE	FALSE
ENOG411CV67	0	2	2	3	1.3048031678308571	-0.010324120500485229	1.1282538052719489	-0.1371468469371592	1	2.5	0.9153349124712078	ENOG411CV67	1352437, 147904808, 148234108, Xelaev18017321m.g, Xelaev18009441m.g, Xelaev18021360m.g	GenBank, Xenbase_9.1	eif4e-like.1.L, eif4e.S, eif4e-like.1.S	RecName: Full=Eukaryotic translation initiation factor 4E; Short=eIF-4E; Short=eIF4E; AltName: Full=eIF-4F 25 kDa subunit; AltName: Full=mRNA cap-binding protein, eukaryotic translation initiation factor 4E [Xenopus laevis], NA	P06730	EIF4E	EIF4EL1 EIF4F	eukaryotic translation initiation factor 4E	0.18000791812739103	0.5785898030282417	FALSE	FALSE	FALSE
ENOG411CZZW	0	2	2	3	1.3048031678308571	-0.010324120500485229	1.1282538052719489	-0.1371468469371592	1	2.5	0.9153349124712078	ENOG411CZZW	147904070, 148222569, 148238189, Xelaev18047315m.g, Xelaev18044876m.g	GenBank, Xenbase_9.1	armc8.S, armc8.L	armadillo repeat-containing protein 8 [Xenopus laevis], uncharacterized protein LOC495694 [Xenopus laevis], uncharacterized protein LOC432075 [Xenopus laevis], NA	Q8IUR7	ARMC8	NA	Armadillo repeat containing 8	0.18000791812739103	0.5785898030282417	FALSE	FALSE	FALSE
ENOG411CQ14	0	2	2	3	1.3048031678308571	-0.010324120500485229	1.1282538052719489	-0.1371468469371592	1	2.5	0.9153349124712078	ENOG411CQ14	123909821, 148232140, 608537, Xelaev18009899m.g	GenBank, Xenbase_9.1	elavl1.S	RecName: Full=ELAV-like protein 1-A; AltName: Full=36 kDa embryonic-type cytoplasmic polyadenylation element-binding protein; Short=36 kDa eCPE-binding protein; Short=36 kDa eCPEB; Short=p36; AltName: Full=Protein ElrA-A; Short=ElrA, ELAV-like protein 1-B [Xenopus laevis], ribonucleoprotein [Xenopus laevis], NA	Q15717	ELAVL1	HUR	ELAV (Embryonic lethal, abnormal vision, Drosophila)-like 1 (Hu antigen R)	0.18000791812739103	0.5785898030282417	FALSE	FALSE	FALSE
ENOG411D5E8	0	2	2	3	1.3048031678308571	-0.010324120500485229	1.1282538052719489	-0.1371468469371592	1	2.5	0.9153349124712078	ENOG411D5E8	284413770, Xelaev18038887m.g	GenBank, Xenbase_9.1	rpl39.L	ribosomal protein L39 [Xenopus laevis], NA	P62891, Q59GN2	RPL39, RPL39P5	NA	ribosomal protein	0.18000791812739103	0.5785898030282417	FALSE	FALSE	FALSE
ENOG411CTB9	0	4	2	6	1.3048031678308571	-0.014601098188945566	1.1282538052719489	-0.06675751904576134	2	4	0.9123106325447139	ENOG411CTB9	147906037, 148236507, 148236741, Xelaev18034803m.g, Xelaev18009114m.g	GenBank, Xenbase_9.1	pdlim1.L, Xelaev18009114m.g	similar to PDZ and LIM domain 1 (elfin) [Xenopus laevis], PDZ and LIM domain protein 3 [Xenopus laevis], PDZ and LIM domain 1 [Xenopus laevis], NA	O00151, Q53GG5	PDLIM1, PDLIM3	CLIM1 CLP36, ALP	PDZ and LIM domain	0.18080260937820475	0.5785898030282417	FALSE	FALSE	FALSE
ENOG411CUR0	0	4	2	6	1.3048031678308571	-0.014601098188945566	1.1282538052719489	-0.06675751904576134	2	4	0.9123106325447139	ENOG411CUR0	117165637, 148223501, 51261986, Xelaev18022725m.g	GenBank, Xenbase_9.1	lsm14a.L	RAP55 protein [Xenopus laevis], protein LSM14 homolog A-B [Xenopus laevis], MGC82934 protein [Xenopus laevis], NA	Q8ND56	LSM14A	C19orf13 FAM61A RAP55 RAP55A	LSM14A, SCD6 homolog A (S. cerevisiae)	0.18080260937820475	0.5785898030282417	FALSE	FALSE	FALSE
ENOG411CWVU	0	0	0	2	0	1.2888515295454006	0	1.032778154505153	0	1	0.9113556564842066	ENOG411CWVU	49119594, Xelaev18005767m.g, Xelaev18009456m.g	GenBank, Xenbase_9.1	smarcad1.L, smarcad1.S	LOC443627 protein [Xenopus laevis], NA	Q9H4L7	SMARCAD1	KIAA1122	SWI SNF-related matrix-associated actin-dependent regulator of chromatin subfamily A containing DEAD H box 1	0.1810540050026639	0.5785898030282417	FALSE	FALSE	FALSE
ENOG411CP71	0	0	0	2	0	1.2888515295454006	0	1.032778154505153	0	1	0.9113556564842066	ENOG411CP71	148232184, Xelaev18009335m.g	GenBank, Xenbase_9.1	ccdc109b.S	coiled-coil domain containing 109B [Xenopus laevis], NA	Q9NWR8	MCUB	CCDC109B	Coiled-coil domain containing 109B	0.1810540050026639	0.5785898030282417	FALSE	FALSE	FALSE
ENOG411CTUM	0	0	0	2	0	1.2888515295454006	0	1.032778154505153	0	1	0.9113556564842066	ENOG411CTUM	147904334, 148232062, Xelaev18041212m.g	GenBank, Xenbase_9.1	c14orf166.S	hypothetical protein LOC494815 [Xenopus laevis], uncharacterized protein LOC496146 [Xenopus laevis], NA	Q9Y224	RTRAF	C14orf166	chromosome 14 open reading frame 166	0.1810540050026639	0.5785898030282417	FALSE	FALSE	FALSE
ENOG411CT4Z	0	0	0	2	0	1.2888515295454006	0	1.032778154505153	0	1	0.9113556564842066	ENOG411CT4Z	148225602, Xelaev18041110m.g	GenBank, Xenbase_9.1	exoc5.S	exocyst complex component 5 [Xenopus laevis], NA	O00471	EXOC5	SEC10 SEC10L1	Exocyst complex component 5	0.1810540050026639	0.5785898030282417	FALSE	FALSE	FALSE
ENOG411CZI9	0	0	0	2	0	1.2888515295454006	0	1.032778154505153	0	1	0.9113556564842066	ENOG411CZI9	351721825, 50927247, Xelaev18046338m.g	GenBank, Xenbase_9.1	prpf6.S	PRP6 pre-mRNA processing factor 6 homolog [Xenopus laevis], MGC80263 protein [Xenopus laevis], NA	O94906	PRPF6	C20orf14	PRP6 pre-mRNA processing factor 6 homolog (S. cerevisiae)	0.1810540050026639	0.5785898030282417	FALSE	FALSE	FALSE
ENOG411CQXC	0	0	0	2	0	1.2888515295454006	0	1.032778154505153	0	1	0.9113556564842066	ENOG411CQXC	148225763	GenBank	NA	sister chromatid cohesion protein DCC1 [Xenopus laevis]	Q9BVC3	DSCC1	DCC1	defective in sister chromatid cohesion 1 homolog (S. cerevisiae)	0.1810540050026639	0.5785898030282417	FALSE	FALSE	FALSE
ENOG411CRY1	0	0	0	2	0	1.2888515295454006	0	1.032778154505153	0	1	0.9113556564842066	ENOG411CRY1	148745075, 2570927, 353523834, 50416394, Xelaev18042638m.g	GenBank, Xenbase_9.1	gemin2.S	Unknown (protein for MGC:160905) [Xenopus laevis], survival of motor neuron protein interacting protein 1 [Xenopus laevis], gem-associated protein 2 [Xenopus laevis], Sip1 protein [Xenopus laevis], NA	O14893	GEMIN2	SIP1	gem (nuclear organelle) associated protein 2	0.1810540050026639	0.5785898030282417	FALSE	FALSE	FALSE
ENOG411CQYY	0	0	0	2	0	1.2888515295454006	0	1.032778154505153	0	1	0.9113556564842066	ENOG411CQYY	148234923, 27735471, Xelaev18029392m.g	GenBank, Xenbase_9.1	orc3.S	origin recognition complex, subunit 3 [Xenopus laevis], Orc3l protein [Xenopus laevis], NA	Q9UBD5	ORC3	LATHEO ORC3L	Origin recognition complex, subunit 3	0.1810540050026639	0.5785898030282417	FALSE	FALSE	FALSE
ENOG411CT9R	0	0	0	2	0	1.2888515295454006	0	1.032778154505153	0	1	0.9113556564842066	ENOG411CT9R	148222446, Xelaev18018936m.g, Xelaev18025409m.g, Xelaev18023330m.g, Xelaev18022978m.g, Xelaev18023353m.g	GenBank, Xenbase_9.1	lrrc8e.L, lrrc8c.S, loc100170560.L, loc100485206.L, lrrc8c.L	leucine-rich repeat-containing protein 8E [Xenopus laevis], NA	Q8TDW0, Q6NSJ5	LRRC8C, LRRC8E	AD158 FAD158, NA	leucine rich repeat containing 8 family, member	0.1810540050026639	0.5785898030282417	FALSE	FALSE	FALSE
ENOG411CRKT	0	0	0	2	0	1.2888515295454006	0	1.032778154505153	0	1	0.9113556564842066	ENOG411CRKT	115528223, 118835659, 147906514, 147907036, 148237655, 157422986, Xelaev18044406m.g, Xelaev18044512m.g, Xelaev18044508m.g, Xelaev18013467m.g, Xelaev18044510m.g, Xelaev18046959m.g, Xelaev18044507m.g, Xelaev18044405m.g, Xelaev18015957m.g, Xelaev18047044m.g	GenBank, Xenbase_9.1	cyp27c1.L, Xelaev18044512m.g, loc100496109.L, cyp27b1.L, Xelaev18044510m.g, cyp27c1.S, loc100145331.L, Xelaev18044405m.g, cyp27b1.S, cyp27b1-like.1.S	LOC733412 protein [Xenopus laevis], Unknown (protein for IMAGE:8532588) [Xenopus laevis], MGC86179 protein [Xenopus laevis], sterol 26-hydroxylase, mitochondrial [Xenopus laevis], uncharacterized protein LOC735141 [Xenopus laevis], NA	O15528, Q02318, Q4G0S4	CYP27B1, CYP27A1, CYP27C1	CYP1ALPHA CYP27B, CYP27, NA	Cytochrome P450 family 27 subfamily	0.1810540050026639	0.5785898030282417	FALSE	FALSE	FALSE
ENOG411CRIG	0	0	0	2	0	1.2888515295454006	0	1.032778154505153	0	1	0.9113556564842066	ENOG411CRIG	148222160, 37544024, Xelaev18035230m.g	GenBank, Xenbase_9.1	ncapd3.L	non-SMC condensin II complex, subunit D3 [Xenopus laevis], condensin II non-SMC subunit [Xenopus laevis], NA	P42695	NCAPD3	CAPD3 KIAA0056	Non-SMC condensin II complex, subunit D3	0.1810540050026639	0.5785898030282417	FALSE	FALSE	FALSE
ENOG411CU8N	0	0	0	2	0	1.2888515295454006	0	1.032778154505153	0	1	0.9113556564842066	ENOG411CU8N	148231970, Xelaev18023278m.g	GenBank, Xenbase_9.1	acbd6.L	acyl-CoA-binding domain-containing protein 6 [Xenopus laevis], NA	Q9BR61	ACBD6	NA	Acyl-CoA binding domain containing 6	0.1810540050026639	0.5785898030282417	FALSE	FALSE	FALSE
ENOG411CTS3	0	0	0	2	0	1.2888515295454006	0	1.032778154505153	0	1	0.9113556564842066	ENOG411CTS3	148231139, Xelaev18006749m.g, Xelaev18031629m.g	GenBank, Xenbase_9.1	Xelaev18006749m.g, eef1e1.L	eukaryotic translation elongation factor 1 epsilon 1 [Xenopus laevis], NA	O43324	EEF1E1	AIMP3 P18	eukaryotic translation elongation factor 1 epsilon 1	0.1810540050026639	0.5785898030282417	FALSE	FALSE	FALSE
ENOG411D0S9	0	0	0	2	0	1.2888515295454006	0	1.032778154505153	0	1	0.9113556564842066	ENOG411D0S9	Xelaev18040958m.g	Xenbase_9.1	msto1.L	NA	Q9BUK6	MSTO1	NA	Misato homolog 1 (Drosophila)	0.1810540050026639	0.5785898030282417	FALSE	FALSE	FALSE
ENOG411DFAK	0	0	0	2	0	1.2888515295454006	0	1.032778154505153	0	1	0.9113556564842066	ENOG411DFAK	147903980, 148222298, 47507239, Xelaev18031769m.g, Xelaev18033539m.g	GenBank, Xenbase_9.1	zadh2.L, zadh2.S	MGC85240 protein [Xenopus laevis], uncharacterized protein LOC432094 [Xenopus laevis], LOC432094 protein [Xenopus laevis], NA	Q8N4Q0	ZADH2	PTGR3	Zinc binding alcohol dehydrogenase, domain containing 2	0.1810540050026639	0.5785898030282417	FALSE	FALSE	FALSE
ENOG411CUFU	0	0	0	2	0	1.2888515295454006	0	1.032778154505153	0	1	0.9113556564842066	ENOG411CUFU	147901982, 148235767, Xelaev18022325m.g	GenBank, Xenbase_9.1	rbm4b.L	RNA binding motif protein 4B [Xenopus laevis], MGC80472 protein [Xenopus laevis], NA	NA	NA	NA	RNA binding motif protein	0.1810540050026639	0.5785898030282417	FALSE	FALSE	FALSE
ENOG411CU1K	0	0	0	2	0	1.2888515295454006	0	1.032778154505153	0	1	0.9113556564842066	ENOG411CU1K	148230569, Xelaev18000034m.g	GenBank, Xenbase_9.1	gpkow.L	G patch domain and KOW motifs-containing protein [Xenopus laevis], NA	Q92917	GPKOW	GPATC5 GPATCH5 T54	G patch domain and KOW motifs	0.1810540050026639	0.5785898030282417	FALSE	FALSE	FALSE
ENOG411CSAI	0	0	0	2	0	1.2888515295454006	0	1.032778154505153	0	1	0.9113556564842066	ENOG411CSAI	Xelaev18012724m.g, Xelaev18015342m.g, Xelaev18010533m.g, Xelaev18007689m.g	Xenbase_9.1	ppm1e.L, ppm1e.S, ppm1f.S, ppm1f.L	NA	P49593, Q8WY54	PPM1F, PPM1E	KIAA0015 POPX2, CAMKN KIAA1072 POPX1	protein phosphatase, Mg2 Mn2 dependent	0.1810540050026639	0.5785898030282417	FALSE	FALSE	FALSE
ENOG411CTE8	0	0	0	2	0	1.2888515295454006	0	1.032778154505153	0	1	0.9113556564842066	ENOG411CTE8	148236233, Xelaev18031165m.g, Xelaev18033222m.g	GenBank, Xenbase_9.1	exosc7.L, exosc7.S	exosome component 7 [Xenopus laevis], NA	Q15024	EXOSC7	KIAA0116 RRP42	exosome component 7	0.1810540050026639	0.5785898030282417	FALSE	FALSE	FALSE
ENOG411DDPY	0	0	0	2	0	1.2888515295454006	0	1.032778154505153	0	1	0.9113556564842066	ENOG411DDPY	147900941, Xelaev18020009m.g	GenBank, Xenbase_9.1	larp1.S	La ribonucleoprotein domain family, member 1 [Xenopus laevis], NA	NA	NA	NA	DM15	0.1810540050026639	0.5785898030282417	FALSE	FALSE	FALSE
ENOG411CV14	0	0	0	2	0	1.2888515295454006	0	1.032778154505153	0	1	0.9113556564842066	ENOG411CV14	123916378, 46249864, Xelaev18043092m.g	GenBank, Xenbase_9.1	ttc25.L	RecName: Full=Tetratricopeptide repeat protein 25; Short=TPR repeat protein 25, LOC414568 protein [Xenopus laevis], NA	Q96NG3	TTC25	NA	Tetratricopeptide repeat domain 25	0.1810540050026639	0.5785898030282417	FALSE	FALSE	FALSE
ENOG411DEP0	0	0	0	2	0	1.2888515295454006	0	1.032778154505153	0	1	0.9113556564842066	ENOG411DEP0	148224538, 24210495, 24210497, 5901737, Xelaev18006193m.g	GenBank, Xenbase_9.1	mbd3.L	methyl-CpG binding domain protein 3 [Xenopus laevis], methyl-CpG binding protein MBD3 [Xenopus laevis], methyl-CpG binding protein MBD3 long form [Xenopus laevis], NA	NA	NA	NA	methyl-CpG binding domain protein 3	0.1810540050026639	0.5785898030282417	FALSE	FALSE	FALSE
ENOG411CQW1	0	0	0	2	0	1.2888515295454006	0	1.032778154505153	0	1	0.9113556564842066	ENOG411CQW1	147899452, 148236355, 40286640, 40286642, Xelaev18012860m.g, Xelaev18015436m.g	GenBank, Xenbase_9.1	nup88.L, nup88.S	nucleoporin 88kDa [Xenopus laevis], nucleoporin Nup88A [Xenopus laevis], nucleoporin Nup88B [Xenopus laevis], NA	Q99567	NUP88	NA	Nucleoporin 88kDa	0.1810540050026639	0.5785898030282417	FALSE	FALSE	FALSE
ENOG411CQR3	0	0	0	2	0	1.2888515295454006	0	1.032778154505153	0	1	0.9113556564842066	ENOG411CQR3	Xelaev18033362m.g	Xenbase_9.1	otulin.S	NA	Q96BN8	OTULIN	FAM105B	Family with sequence similarity 105, member B	0.1810540050026639	0.5785898030282417	FALSE	FALSE	FALSE
ENOG411CWQP	0	0	0	2	0	1.2888515295454006	0	1.032778154505153	0	1	0.9113556564842066	ENOG411CWQP	148226591, Xelaev18039651m.g, Xelaev18041223m.g	GenBank, Xenbase_9.1	Xelaev18039651m.g, Xelaev18041223m.g	uncharacterized protein LOC495362 [Xenopus laevis], NA	P60983	GMFB	NA	glia maturation factor beta	0.1810540050026639	0.5785898030282417	FALSE	FALSE	FALSE
ENOG411CQKH	0	0	0	2	0	1.2888515295454006	0	1.032778154505153	0	1	0.9113556564842066	ENOG411CQKH	111185524, 146324988, 49256048, Xelaev18005019m.g	GenBank, Xenbase_9.1	maea.L	Maea protein [Xenopus laevis], RecName: Full=Macrophage erythroblast attacher, MGC81431 protein [Xenopus laevis], NA	Q7L5Y9	MAEA	EMP	Macrophage erythroblast attacher	0.1810540050026639	0.5785898030282417	FALSE	FALSE	FALSE
ENOG411CRHR	0	0	0	2	0	1.2888515295454006	0	1.032778154505153	0	1	0.9113556564842066	ENOG411CRHR	147898518, 147902986, Xelaev18047586m.g, Xelaev18045282m.g	GenBank, Xenbase_9.1	Xelaev18047586m.g, Xelaev18045282m.g	cAMP-dependent protein kinase, regulatory subunit alpha 1 [Xenopus laevis], protein kinase, cAMP-dependent, regulatory, type I,beta [Xenopus laevis], NA	P10644, P31321	PRKAR1A, PRKAR1B	PKR1 PRKAR1 TSE1, NA	Protein kinase, cAMP-dependent, regulatory, type I	0.1810540050026639	0.5785898030282417	FALSE	FALSE	FALSE
ENOG411CQ9I	0	0	0	2	0	1.2888515295454006	0	1.032778154505153	0	1	0.9113556564842066	ENOG411CQ9I	76780352, Xelaev18018064m.g, Xelaev18020756m.g	GenBank, Xenbase_9.1	mpi.L, mpi.S	LOC733350 protein [Xenopus laevis], NA	P34949	MPI	PMI1	mannose phosphate isomerase	0.1810540050026639	0.5785898030282417	FALSE	FALSE	FALSE
ENOG411CSNF	0	0	0	2	0	1.2888515295454006	0	1.032778154505153	0	1	0.9113556564842066	ENOG411CSNF	148234990, Xelaev18018253m.g, Xelaev18020599m.g	GenBank, Xenbase_9.1	usp8.L, usp8.S	ubiquitin specific peptidase 8 [Xenopus laevis], NA	P40818	USP8	KIAA0055 UBPY	Ubiquitin specific peptidase 8	0.1810540050026639	0.5785898030282417	FALSE	FALSE	FALSE
ENOG411CZF7	0	0	0	2	0	1.2888515295454006	0	1.032778154505153	0	1	0.9113556564842066	ENOG411CZF7	Xelaev18027195m.g	Xenbase_9.1	fig4.L	NA	Q92562	FIG4	KIAA0274 SAC3	FIG4 homolog, SAC1 lipid phosphatase domain containing (S. cerevisiae)	0.1810540050026639	0.5785898030282417	FALSE	FALSE	FALSE
ENOG411CU2Z	0	0	0	2	0	1.2888515295454006	0	1.032778154505153	0	1	0.9113556564842066	ENOG411CU2Z	148224594	GenBank	NA	cysteine and histidine-rich domain-containing protein 1 [Xenopus laevis]	Q9UHD1	CHORDC1	CHP1	cysteine and histidine-rich domain (CHORD) containing 1	0.1810540050026639	0.5785898030282417	FALSE	FALSE	FALSE
ENOG411D47M	0	0	0	2	0	1.2888515295454006	0	1.032778154505153	0	1	0.9113556564842066	ENOG411D47M	Xelaev18042737m.g, Xelaev18040381m.g	Xenbase_9.1	mrps21.S, mrps21.L	NA	P82921	MRPS21	RPMS21	mitochondrial ribosomal protein S21	0.1810540050026639	0.5785898030282417	FALSE	FALSE	FALSE
ENOG411CXXR	0	0	0	2	0	1.2888515295454006	0	1.032778154505153	0	1	0.9113556564842066	ENOG411CXXR	147902750, 148231305	GenBank	NA	WD repeat domain 5 [Xenopus laevis]	P61964, Q86VZ2	WDR5, WDR5B	BIG3, NA	WD repeat domain	0.1810540050026639	0.5785898030282417	FALSE	FALSE	FALSE
ENOG411DF2X	0	0	0	2	0	1.2888515295454006	0	1.032778154505153	0	1	0.9113556564842066	ENOG411DF2X	148231968, Xelaev18003771m.g	GenBank, Xenbase_9.1	irf2bp2.S	interferon regulatory factor 2-binding protein 2 [Xenopus laevis], NA	Q7Z5L9	IRF2BP2	NA	interferon regulatory factor 2 binding protein 2	0.1810540050026639	0.5785898030282417	FALSE	FALSE	FALSE
ENOG411CX2Q	0	0	0	2	0	1.2888515295454006	0	1.032778154505153	0	1	0.9113556564842066	ENOG411CX2Q	148223445, 148225809	GenBank	NA	MGC81861 protein [Xenopus laevis], anaphase promoting complex subunit 7 [Xenopus laevis]	Q9UJX3	ANAPC7	APC7	anaphase promoting complex subunit 7	0.1810540050026639	0.5785898030282417	FALSE	FALSE	FALSE
ENOG411CYE4	0	0	0	2	0	1.2888515295454006	0	1.032778154505153	0	1	0.9113556564842066	ENOG411CYE4	114107936, 49119606, Xelaev18000412m.g, Xelaev18003304m.g, Xelaev18003303m.g	GenBank, Xenbase_9.1	kdelc2, Xelaev18003304m.g, kdelc2.L	LOC443629 protein [Xenopus laevis], NA	Q7Z4H8	POGLUT3	KDELC2	KDEL (Lys-Asp-Glu-Leu) containing 2	0.1810540050026639	0.5785898030282417	FALSE	FALSE	FALSE
ENOG411CUBZ	0	0	0	2	0	1.2888515295454006	0	1.032778154505153	0	1	0.9113556564842066	ENOG411CUBZ	Xelaev18038477m.g, Xelaev18041862m.g	Xenbase_9.1	mrrf.L, mrrf.S	NA	Q96E11	MRRF	NA	mitochondrial ribosome recycling factor	0.1810540050026639	0.5785898030282417	FALSE	FALSE	FALSE
ENOG411CVQ5	0	0	0	2	0	1.2888515295454006	0	1.032778154505153	0	1	0.9113556564842066	ENOG411CVQ5	261826170, Xelaev18041289m.g, Xelaev18039579m.g	GenBank, Xenbase_9.1	dicer1.S, dicer1.L	truncated double-stranded RNA-specific endoribonuclease type III [Xenopus laevis], NA	NA	NA	NA	Dicer 1, ribonuclease type III	0.1810540050026639	0.5785898030282417	FALSE	FALSE	FALSE
ENOG411CR4R	0	0	0	2	0	1.2888515295454006	0	1.032778154505153	0	1	0.9113556564842066	ENOG411CR4R	147903274, Xelaev18047661m.g, Xelaev18045379m.g	GenBank, Xenbase_9.1	cog7.S, cog7.L	component of oligomeric golgi complex 7 [Xenopus laevis], NA	P83436	COG7	NA	Component of oligomeric Golgi complex 7	0.1810540050026639	0.5785898030282417	FALSE	FALSE	FALSE
ENOG411CYU8	0	0	0	2	0	1.2888515295454006	0	1.032778154505153	0	1	0.9113556564842066	ENOG411CYU8	148223924, 3288648, Xelaev18044554m.g	GenBank, Xenbase_9.1	orc4.L	origin recognition complex subunit 4 [Xenopus laevis], NA	O43929	ORC4	ORC4L	origin recognition complex subunit 4	0.1810540050026639	0.5785898030282417	FALSE	FALSE	FALSE
ENOG411DF3H	0	0	0	2	0	1.2888515295454006	0	1.032778154505153	0	1	0.9113556564842066	ENOG411DF3H	148226775, 213625334, 52693902, Xelaev18028151m.g	GenBank, Xenbase_9.1	tdrd6.L	tudor domain containing 6 [Xenopus laevis], Xtr protein [Xenopus laevis], tudor repeat protein Xtr [Xenopus laevis], NA	NA	NA	NA	Tudor domain containing 6	0.1810540050026639	0.5785898030282417	FALSE	FALSE	FALSE
ENOG411CX0Q	0	0	0	2	0	1.2888515295454006	0	1.032778154505153	0	1	0.9113556564842066	ENOG411CX0Q	148233738, Xelaev18025953m.g	GenBank, Xenbase_9.1	jagn1.S	protein jagunal homolog 1 [Xenopus laevis], NA	Q8N5M9	JAGN1	NA	jagunal homolog 1 (Drosophila)	0.1810540050026639	0.5785898030282417	FALSE	FALSE	FALSE
ENOG411CPD7	0	0	0	2	0	1.2888515295454006	0	1.032778154505153	0	1	0.9113556564842066	ENOG411CPD7	117167861, 54311518, Xelaev18040866m.g, Xelaev18042964m.g	GenBank, Xenbase_9.1	ints3.L, ints3.S	LOC495409 protein [Xenopus laevis], NA	Q68E01	INTS3	C1orf193 C1orf60	Integrator complex subunit 3	0.1810540050026639	0.5785898030282417	FALSE	FALSE	FALSE
ENOG411DAT4	0	0	0	2	0	1.2888515295454006	0	1.032778154505153	0	1	0.9113556564842066	ENOG411DAT4	Xelaev18029041m.g, Xelaev18026794m.g	Xenbase_9.1	Xetrov90013533m.S, Xetrov90013533m.L	NA	NA	NA	NA	Inherit from KOG: Set and mynd domain containing	0.1810540050026639	0.5785898030282417	FALSE	FALSE	FALSE
ENOG411CSY6	0	0	0	2	0	1.2888515295454006	0	1.032778154505153	0	1	0.9113556564842066	ENOG411CSY6	148230881, 4583429, Xelaev18047550m.g	GenBank, Xenbase_9.1	mad1l1.S	spindle checkpoint protein Xmad1 [Xenopus laevis], NA	Q9Y6D9	MAD1L1	MAD1 TXBP181	MAD1 mitotic arrest deficient-like 1 (yeast)	0.1810540050026639	0.5785898030282417	FALSE	FALSE	FALSE
ENOG411CY0W	0	0	0	2	0	1.2888515295454006	0	1.032778154505153	0	1	0.9113556564842066	ENOG411CY0W	57921026, Xelaev18015082m.g, Xelaev18012097m.g	GenBank, Xenbase_9.1	wasf2.S, wasf2.L	LOC733146 protein [Xenopus laevis], NA	NA	NA	NA	WAS protein family, member 2	0.1810540050026639	0.5785898030282417	FALSE	FALSE	FALSE
ENOG411CXWB	0	0	0	2	0	1.2888515295454006	0	1.032778154505153	0	1	0.9113556564842066	ENOG411CXWB	148234435, 54035096	GenBank	NA	NIN1/RPN12 binding protein 1 homolog [Xenopus laevis], LOC398701 protein [Xenopus laevis]	Q9ULX3	NOB1	ART4 NOB1P PSMD8BP1	NIN1 RPN12 binding protein 1 homolog (S. cerevisiae)	0.1810540050026639	0.5785898030282417	FALSE	FALSE	FALSE
ENOG411DGJ3	0	0	0	2	0	1.2888515295454006	0	1.032778154505153	0	1	0.9113556564842066	ENOG411DGJ3	148225534, Xelaev18014933m.g	GenBank, Xenbase_9.1	dhrs11.S	dehydrogenase/reductase (SDR family) member 11 [Xenopus laevis], NA	Q6UWP2	DHRS11	SDR24C1	Dehydrogenase reductase (SDR family) member 11	0.1810540050026639	0.5785898030282417	FALSE	FALSE	FALSE
ENOG411CQWW	0	0	0	2	0	1.2888515295454006	0	1.032778154505153	0	1	0.9113556564842066	ENOG411CQWW	120577444, 189441696, Xelaev18022335m.g, Xelaev18026441m.g, Xelaev18040090m.g, Xelaev18002697m.g	GenBank, Xenbase_9.1	pacs1.L, Xelaev18026441m.g, pacs2.L, pacs2.S	LOC100037023 protein [Xenopus laevis], LOC100174797 protein [Xenopus laevis], NA	Q6VY07, Q86VP3	PACS1, PACS2	KIAA1175, KIAA0602 PACS1L	phosphofurin acidic cluster sorting protein	0.1810540050026639	0.5785898030282417	FALSE	FALSE	FALSE
ENOG411CSEC	0	0	0	2	0	1.2888515295454006	0	1.032778154505153	0	1	0.9113556564842066	ENOG411CSEC	147904605, Xelaev18032103m.g	GenBank, Xenbase_9.1	orc5.L	origin recognition complex, subunit 5 [Xenopus laevis], NA	O43913	ORC5	ORC5L	Origin recognition complex, subunit 5	0.1810540050026639	0.5785898030282417	FALSE	FALSE	FALSE
ENOG411CWFF	0	0	0	2	0	1.2888515295454006	0	1.032778154505153	0	1	0.9113556564842066	ENOG411CWFF	147899926, Xelaev18042658m.g	GenBank, Xenbase_9.1	vps18.S	vacuolar protein sorting 18 homolog [Xenopus laevis], NA	Q9P253	VPS18	KIAA1475	vacuolar protein sorting 18 homolog (S. cerevisiae)	0.1810540050026639	0.5785898030282417	FALSE	FALSE	FALSE
ENOG411CQ2S	0	0	0	2	0	1.2888515295454006	0	1.032778154505153	0	1	0.9113556564842066	ENOG411CQ2S	13235654, Xelaev18017194m.g, Xelaev18021459m.g	GenBank, Xenbase_9.1	kif3a.L, kif3a.S	minesin-like protein [Xenopus laevis], NA	Q9Y496	KIF3A	KIF3	Kinesin family member 3a	0.1810540050026639	0.5785898030282417	FALSE	FALSE	FALSE
ENOG411CUU3	0	0	0	2	0	1.2888515295454006	0	1.032778154505153	0	1	0.9113556564842066	ENOG411CUU3	148224088, Xelaev18037953m.g, Xelaev18036366m.g	GenBank, Xenbase_9.1	ddi2.S, ddi2.L	hypothetical protein LOC379186 [Xenopus laevis], NA	Q8WTU0, Q5TDH0	DDI1, DDI2	NA	DNA-damage inducible 1 homolog 2 (S. cerevisiae)	0.1810540050026639	0.5785898030282417	FALSE	FALSE	FALSE
ENOG411CWRP	0	0	0	2	0	1.2888515295454006	0	1.032778154505153	0	1	0.9113556564842066	ENOG411CWRP	Xelaev18039539m.g	Xenbase_9.1	c14orf159.L	NA	Q7Z3D6	DGLUCY	C14orf159	Chromosome 14 open reading frame 159	0.1810540050026639	0.5785898030282417	FALSE	FALSE	FALSE
ENOG411CQX0	0	0	0	2	0	1.2888515295454006	0	1.032778154505153	0	1	0.9113556564842066	ENOG411CQX0	Xelaev18044821m.g	Xenbase_9.1	usp40.L	NA	Q9NVE5	USP40	NA	ubiquitin specific peptidase 40	0.1810540050026639	0.5785898030282417	FALSE	FALSE	FALSE
ENOG411CPKE	0	0	0	2	0	1.2888515295454006	0	1.032778154505153	0	1	0.9113556564842066	ENOG411CPKE	115529165, 187671928, Xelaev18039519m.g	GenBank, Xenbase_9.1	zc3h14.L	Zc3h14 protein [Xenopus laevis], RecName: Full=Zinc finger CCCH domain-containing protein 14, NA	Q6PJT7	ZC3H14	NA	zinc finger CCCH-type containing 14	0.1810540050026639	0.5785898030282417	FALSE	FALSE	FALSE
ENOG411CR79	0	0	0	2	0	1.2888515295454006	0	1.032778154505153	0	1	0.9113556564842066	ENOG411CR79	189442244, Xelaev18017477m.g, Xelaev18021230m.g, Xelaev18013808m.g, Xelaev18017475m.g, Xelaev18021227m.g	GenBank, Xenbase_9.1	Xelaev18017477m.g, angpt4.S, angptl5.L, angpt4.L, Xelaev18021227m.g	LOC100174806 protein [Xenopus laevis], NA	Q86XS5	ANGPTL5	NA	Angiopoietin-like 5	0.1810540050026639	0.5785898030282417	FALSE	FALSE	FALSE
ENOG411CSZ6	0	0	0	2	0	1.2888515295454006	0	1.032778154505153	0	1	0.9113556564842066	ENOG411CSZ6	Xelaev18017283m.g	Xenbase_9.1	thoc3.L	NA	Q96J01	THOC3	NA	THO complex 3	0.1810540050026639	0.5785898030282417	FALSE	FALSE	FALSE
ENOG411CVFC	0	0	0	2	0	1.2888515295454006	0	1.032778154505153	0	1	0.9113556564842066	ENOG411CVFC	126631424, 147904248, 148237681, 52139116, Xelaev18026070m.g, Xelaev18041228m.g	GenBank, Xenbase_9.1	fermt1.L, fermt2.S	LOC100049120 protein [Xenopus laevis], fermitin family member 2 [Xenopus laevis], fermitin family member 1 [Xenopus laevis], LOC494682 protein [Xenopus laevis], NA	Q96AC1, Q9BQL6	FERMT2, FERMT1	KIND2 MIG2 PLEKHC1, C20orf42 KIND1 URP1	fermitin family member	0.1810540050026639	0.5785898030282417	FALSE	FALSE	FALSE
ENOG411CVI2	0	0	0	2	0	1.2888515295454006	0	1.032778154505153	0	1	0.9113556564842066	ENOG411CVI2	148235967, Xelaev18038265m.g	GenBank, Xenbase_9.1	arrdc1.L	arrestin domain containing 1 [Xenopus laevis], NA	Q8N5I2	ARRDC1	NA	arrestin domain containing 1	0.1810540050026639	0.5785898030282417	FALSE	FALSE	FALSE
ENOG411CP7B	0	0	0	2	0	1.2888515295454006	0	1.032778154505153	0	1	0.9113556564842066	ENOG411CP7B	Xelaev18022454m.g	Xenbase_9.1	heatr3.L	NA	Q7Z4Q2	HEATR3	NA	HEAT repeat containing 3	0.1810540050026639	0.5785898030282417	FALSE	FALSE	FALSE
ENOG411CU7G	0	0	0	2	0	1.2888515295454006	0	1.032778154505153	0	1	0.9113556564842066	ENOG411CU7G	148228553, 153791802, 15808364, 160420169, Xelaev18025056m.g, Xelaev18018940m.g, Xelaev18022902m.g	GenBank, Xenbase_9.1	prkacb.S, prkaca.L, prkacb.L	protein kinase, cAMP-dependent, catalytic, beta [Xenopus laevis], protein kinase, cAMP-dependent, catalytic, alpha [Xenopus laevis], cAMP-dependent protein kinase catalytic subunit beta [Xenopus laevis], protein kinase, cAMP-dependent, catalytic, beta b [Xenopus laevis], NA	P17612, P22694	PRKACA, PRKACB	PKACA, NA	Protein kinase, cAMP-dependent, catalytic	0.1810540050026639	0.5785898030282417	FALSE	FALSE	FALSE
ENOG411CWHW	0	0	0	2	0	1.2888515295454006	0	1.032778154505153	0	1	0.9113556564842066	ENOG411CWHW	Xelaev18011733m.g	Xenbase_9.1	wdr81.L	NA	Q562E7	WDR81	NA	WD repeat domain 81	0.1810540050026639	0.5785898030282417	FALSE	FALSE	FALSE
ENOG411CTKK	0	0	0	2	0	1.2888515295454006	0	1.032778154505153	0	1	0.9113556564842066	ENOG411CTKK	147898417, 62739361, Xelaev18013460m.g, Xelaev18044834m.g, Xelaev18032576m.g, Xelaev18003160m.g, Xelaev18015953m.g, Xelaev18047281m.g	GenBank, Xenbase_9.1	agap2.L, agap1.L, Xelaev18032576m.g, agap3.L, agap2.S, agap1.S	arf-GAP with GTPase, ANK repeat and PH domain-containing protein 1 [Xenopus laevis], Unknown (protein for MGC:115253) [Xenopus laevis], NA	Q9UPQ3, Q96P47, Q99490	AGAP1, AGAP3, AGAP2	CENTG2 KIAA1099, CENTG3, CENTG1 KIAA0167	ArfGAP with GTPase domain, ankyrin repeat and PH domain	0.1810540050026639	0.5785898030282417	FALSE	FALSE	FALSE
ENOG411CR6Q	0	0	0	2	0	1.2888515295454006	0	1.032778154505153	0	1	0.9113556564842066	ENOG411CR6Q	133737065, 148227154, 148234949, 148236470, 148237960, 156119431, 213623630, 213625084, 227605, Xelaev18015622m.g, Xelaev18037818m.g	GenBank, Xenbase_9.1	ralb.S, Xelaev18037818m.g	N-ras protein [Xenopus laevis], v-ral simian leukemia viral oncogene homolog B (ras related; GTP binding protein) [Xenopus laevis], v-Ki-ras2 Kirsten rat sarcoma viral oncogene homolog [Xenopus laevis], Ras protein [Xenopus laevis], v-Ha-ras Harvey rat sarcoma viral oncogene homolog [Xenopus laevis], GTPase KRas precursor [Xenopus laevis], Unknown (protein for MGC:196727) [Xenopus laevis], Unknow…	P01112, P01116, P01111	HRAS, KRAS, NRAS	HRAS1, KRAS2 RASK2	rat sarcoma viral oncogene homolog	0.1810540050026639	0.5785898030282417	FALSE	FALSE	FALSE
ENOG411CVA3	0	0	0	2	0	1.2888515295454006	0	1.032778154505153	0	1	0.9113556564842066	ENOG411CVA3	148236313, Xelaev18020620m.g	GenBank, Xenbase_9.1	myef2.S	myelin expression factor 2 [Xenopus laevis], NA	Q9P2K5	MYEF2	KIAA1341	Myelin expression factor 2	0.1810540050026639	0.5785898030282417	FALSE	FALSE	FALSE
ENOG411CZU8	0	0	0	2	0	1.2888515295454006	0	1.032778154505153	0	1	0.9113556564842066	ENOG411CZU8	148228923, Xelaev18022157m.g, Xelaev18024256m.g	GenBank, Xenbase_9.1	vps51.L, vps51.S	protein fat-free homolog [Xenopus laevis], NA	Q9UID3	VPS51	ANG2 C11orf2 C11orf3 FFR	vacuolar protein sorting 51 homolog (S. cerevisiae)	0.1810540050026639	0.5785898030282417	FALSE	FALSE	FALSE
ENOG411CR64	0	0	0	2	0	1.2888515295454006	0	1.032778154505153	0	1	0.9113556564842066	ENOG411CR64	Xelaev18036886m.g, Xelaev18004866m.g, Xelaev18008773m.g, Xelaev18004865m.g, Xelaev18034596m.g	Xenbase_9.1	exoc6.S, Xelaev18004866m.g, Xelaev18008773m.g, Xelaev18004865m.g, exoc6.L	NA	Q8TAG9, Q9Y2D4	EXOC6, EXOC6B	SEC15A SEC15L SEC15L1, KIAA0919 SEC15B SEC15L2	exocyst complex component	0.1810540050026639	0.5785898030282417	FALSE	FALSE	FALSE
ENOG411CQRK	0	0	0	2	0	1.2888515295454006	0	1.032778154505153	0	1	0.9113556564842066	ENOG411CQRK	46250145, Xelaev18002190m.g, Xelaev18002187m.g	GenBank, Xenbase_9.1	Xelaev18002190m.g, nmral1.S	LOC414512 protein [Xenopus laevis], NA	Q9HBL8	NMRAL1	HSCARG	NmrA-like family domain containing 1	0.1810540050026639	0.5785898030282417	FALSE	FALSE	FALSE
ENOG411CU03	0	0	0	2	0	1.2888515295454006	0	1.032778154505153	0	1	0.9113556564842066	ENOG411CU03	148237639	GenBank	NA	ISY1 splicing factor homolog [Xenopus laevis]	Q9ULR0	ISY1	KIAA1160	ISY1 splicing factor homolog (S. cerevisiae)	0.1810540050026639	0.5785898030282417	FALSE	FALSE	FALSE
ENOG411CUMU	0	0	0	2	0	1.2888515295454006	0	1.032778154505153	0	1	0.9113556564842066	ENOG411CUMU	Xelaev18020312m.g, Xelaev18018577m.g	Xenbase_9.1	ciao1.S, ciao1.L	NA	O76071	CIAO1	CIA1 WDR39	cytosolic iron-sulfur protein assembly 1	0.1810540050026639	0.5785898030282417	FALSE	FALSE	FALSE
ENOG411CXFB	0	0	0	2	0	1.2888515295454006	0	1.032778154505153	0	1	0.9113556564842066	ENOG411CXFB	148230011, Xelaev18022353m.g, Xelaev18024677m.g	GenBank, Xenbase_9.1	mpp1.L, Xelaev18024677m.g	membrane protein, palmitoylated 1, 55kDa [Xenopus laevis], NA	Q00013	MPP1	DXS552E EMP55	Membrane protein, palmitoylated 1, 55kDa	0.1810540050026639	0.5785898030282417	FALSE	FALSE	FALSE
ENOG411CY0Z	0	0	0	2	0	1.2888515295454006	0	1.032778154505153	0	1	0.9113556564842066	ENOG411CY0Z	113953, 113971, 214533, 27881813, 7248186	GenBank	NA	RecName: Full=Annexin A2-B; AltName: Full=Annexin II type II; AltName: Full=Annexin-2-B; AltName: Full=Calpactin I heavy chain; AltName: Full=Calpactin-1 heavy chain; AltName: Full=Lipocortin II, RecName: Full=Annexin A2-A; AltName: Full=Annexin II type I; AltName: Full=Annexin-2-A; AltName: Full=Calpactin I heavy chain; AltName: Full=Calpactin-1 heavy chain; AltName: Full=Lipocortin II, annexin …	P07355, A6NMY6	ANXA2, ANXA2P2	ANX2 ANX2L4 CAL1H LPC2D, ANX2L2 ANX2P2 LPC2B	Annexin A2	0.1810540050026639	0.5785898030282417	FALSE	FALSE	FALSE
ENOG411CQ0C	0	0	0	2	0	1.2888515295454006	0	1.032778154505153	0	1	0.9113556564842066	ENOG411CQ0C	Xelaev18009101m.g, Xelaev18005321m.g, Xelaev18038737m.g, Xelaev18013775m.g	Xenbase_9.1	mtmr7-like.S, mtmr7-like.L, mtmr8-like.L, mtmr6.L	NA	Q9Y216, Q9Y217, Q96EF0	MTMR7, MTMR6, MTMR8	NA	Myotubularin related protein	0.1810540050026639	0.5785898030282417	FALSE	FALSE	FALSE
ENOG411CQXG	0	0	0	2	0	1.2888515295454006	0	1.032778154505153	0	1	0.9113556564842066	ENOG411CQXG	115527881, 49256283, 62471477, Xelaev18044471m.g, Xelaev18031198m.g	GenBank, Xenbase_9.1	glb1.L, glb1l.L	LOC100158367 protein [Xenopus laevis], LOC443705 protein [Xenopus laevis], NA	P16278, Q6UWU2	GLB1, GLB1L	ELNR1, NA	galactosidase, beta	0.1810540050026639	0.5785898030282417	FALSE	FALSE	FALSE
ENOG411CW9E	0	0	0	2	0	1.2888515295454006	0	1.032778154505153	0	1	0.9113556564842066	ENOG411CW9E	148237199, Xelaev18022859m.g	GenBank, Xenbase_9.1	setd6.L	N-lysine methyltransferase setd6 [Xenopus laevis], NA	Q8TBK2	SETD6	NA	SET domain containing 6	0.1810540050026639	0.5785898030282417	FALSE	FALSE	FALSE
ENOG411CPN7	0	0	0	2	0	1.2888515295454006	0	1.032778154505153	0	1	0.9113556564842066	ENOG411CPN7	147905682, 28278733, 52139086, Xelaev18031895m.g	GenBank, Xenbase_9.1	thoc1.L	THO complex 1 protein [Xenopus laevis], LOC398505 protein [Xenopus laevis], NA	Q96FV9	THOC1	HPR1	THO complex 1	0.1810540050026639	0.5785898030282417	FALSE	FALSE	FALSE
ENOG411CQU0	0	0	0	2	0	1.2888515295454006	0	1.032778154505153	0	1	0.9113556564842066	ENOG411CQU0	49256136, Xelaev18018414m.g	GenBank, Xenbase_9.1	lrrk1.L	LOC443614 protein [Xenopus laevis], NA	Q38SD2	LRRK1	KIAA1790	leucine-rich repeat kinase 1	0.1810540050026639	0.5785898030282417	FALSE	FALSE	FALSE
ENOG411CR35	0	0	0	2	0	1.2888515295454006	0	1.032778154505153	0	1	0.9113556564842066	ENOG411CR35	148229126, Xelaev18013324m.g	GenBank, Xenbase_9.1	rhebl1.L	Ras homolog enriched in brain like 1 [Xenopus laevis], NA	Q8TAI7	RHEBL1	NA	Ras homolog enriched in brain like 1	0.1810540050026639	0.5785898030282417	FALSE	FALSE	FALSE
ENOG411CVI6	0	0	0	2	0	1.2888515295454006	0	1.032778154505153	0	1	0.9113556564842066	ENOG411CVI6	Xelaev18038721m.g, Xelaev18042081m.g	Xenbase_9.1	las1l.L, las1l.S	NA	Q9Y4W2	LAS1L	NA	LAS1-like (S. cerevisiae)	0.1810540050026639	0.5785898030282417	FALSE	FALSE	FALSE
ENOG411CUQI	0	0	0	2	0	1.2888515295454006	0	1.032778154505153	0	1	0.9113556564842066	ENOG411CUQI	54648320, 56972631, Xelaev18023169m.g, Xelaev18025270m.g	GenBank, Xenbase_9.1	osbpl9.L, osbpl9.S	LOC495487 protein [Xenopus laevis], LOC496292 protein [Xenopus laevis], NA	Q96SU4	OSBPL9	ORP9 OSBP4	Oxysterol binding protein-like 9	0.1810540050026639	0.5785898030282417	FALSE	FALSE	FALSE
ENOG411CQDP	0	0	0	2	0	1.2888515295454006	0	1.032778154505153	0	1	0.9113556564842066	ENOG411CQDP	147903811, Xelaev18024568m.g, Xelaev18021780m.g, Xelaev18016682m.g	GenBank, Xenbase_9.1	parva.S, parva.L, parvb.L	parvin, beta [Xenopus laevis], NA	Q9NVD7, Q9HBI1	PARVA, PARVB	MXRA2, NA	Parvin, alpha	0.1810540050026639	0.5785898030282417	FALSE	FALSE	FALSE
ENOG411D0JK	0	0	0	2	0	1.2888515295454006	0	1.032778154505153	0	1	0.9113556564842066	ENOG411D0JK	148235771, Xelaev18017694m.g, Xelaev18021028m.g	GenBank, Xenbase_9.1	trabd.L, trabd.S	TraB domain containing [Xenopus laevis], NA	Q9H4I3	TRABD	TTG2	TraB domain containing	0.1810540050026639	0.5785898030282417	FALSE	FALSE	FALSE
ENOG411CP7P	0	0	0	2	0	1.2888515295454006	0	1.032778154505153	0	1	0.9113556564842066	ENOG411CP7P	21634428, Xelaev18033182m.g, Xelaev18031123m.g	GenBank, Xenbase_9.1	pik3r4.S, pik3r4.L	adaptor protein p150 [Xenopus laevis], NA	Q99570	PIK3R4	VPS15	phosphoinositide-3-kinase, regulatory subunit 4	0.1810540050026639	0.5785898030282417	FALSE	FALSE	FALSE
ENOG411CR8P	0	0	0	2	0	1.2888515295454006	0	1.032778154505153	0	1	0.9113556564842066	ENOG411CR8P	Xelaev18012492m.g	Xenbase_9.1	stx12.L	NA	Q86Y82	STX12	NA	syntaxin 12	0.1810540050026639	0.5785898030282417	FALSE	FALSE	FALSE
ENOG411CTRR	0	0	0	2	0	1.2888515295454006	0	1.032778154505153	0	1	0.9113556564842066	ENOG411CTRR	49256183, 62203134, Xelaev18046599m.g	GenBank, Xenbase_9.1	actr5.S	LOC443572 protein [Xenopus laevis], NA	Q9H9F9	ACTR5	ARP5	ARP5 actin-related protein 5 homolog (yeast)	0.1810540050026639	0.5785898030282417	FALSE	FALSE	FALSE
ENOG411CXA5	0	0	0	2	0	1.2888515295454006	0	1.032778154505153	0	1	0.9113556564842066	ENOG411CXA5	148232632, 148234953, 253723086, Xelaev18009476m.g, Xelaev18020374m.g	GenBank, Xenbase_9.1	mob1b.S, mob1a.S	MOB kinase activator 1A [Xenopus laevis], MOB kinase activator 1B [Xenopus laevis], Chain A, Solution Structure Of Xenopus Laevis Mob1, NA	Q7L9L4, Q9H8S9	MOB1B, MOB1A	MOB4A MOBKL1A, C2orf6 MOB4B MOBK1B MOBKL1B	MOB kinase activator	0.1810540050026639	0.5785898030282417	FALSE	FALSE	FALSE
ENOG411CXV4	0	0	0	2	0	1.2888515295454006	0	1.032778154505153	0	1	0.9113556564842066	ENOG411CXV4	Xelaev18009783m.g, Xelaev18006251m.g, Xelaev18010610m.g, Xelaev18007784m.g	Xenbase_9.1	sbno2.S, sbno2.L, sbno1.S, sbno1.L	NA	Q9Y2G9, A3KN83	SBNO2, SBNO1	KIAA0963, MOP3	Strawberry notch homolog	0.1810540050026639	0.5785898030282417	FALSE	FALSE	FALSE
ENOG411CYN0	0	0	0	2	0	1.2888515295454006	0	1.032778154505153	0	1	0.9113556564842066	ENOG411CYN0	224487992, 49119128, Xelaev18023493m.g, Xelaev18025520m.g	GenBank, Xenbase_9.1	edem3.L, edem3.S	RecName: Full=ER degradation-enhancing alpha-mannosidase-like 3; Flags: Precursor, MGC80179 protein [Xenopus laevis], NA	Q9BZQ6	EDEM3	C1orf22	ER degradation enhancer, mannosidase alpha-like 3	0.1810540050026639	0.5785898030282417	FALSE	FALSE	FALSE
ENOG411CX0X	0	0	0	2	0	1.2888515295454006	0	1.032778154505153	0	1	0.9113556564842066	ENOG411CX0X	148237872, Xelaev18007472m.g	GenBank, Xenbase_9.1	aldh3b1-like.1.L	aldehyde dehydrogenase 3 family, member B1 [Xenopus laevis], NA	NA	NA	NA	Aldehyde dehydrogenase	0.1810540050026639	0.5785898030282417	FALSE	FALSE	FALSE
ENOG411D1R4	0	0	0	2	0	1.2888515295454006	0	1.032778154505153	0	1	0.9113556564842066	ENOG411D1R4	Xelaev18019983m.g	Xenbase_9.1	loc100494722.S	NA	NA	NA	NA	LON peptidase N-terminal domain and RING finger protein 1-like	0.1810540050026639	0.5785898030282417	FALSE	FALSE	FALSE
ENOG411DE1Y	0	0	0	2	0	1.2888515295454006	0	1.032778154505153	0	1	0.9113556564842066	ENOG411DE1Y	148231738, 148236691, Xelaev18044878m.g, Xelaev18047317m.g	GenBank, Xenbase_9.1	adprh.L, adprh.S	ADP-ribosylarginine hydrolase [Xenopus laevis], uncharacterized protein LOC432184 [Xenopus laevis], NA	P54922	ADPRH	ARH1	ADP-ribosylarginine hydrolase	0.1810540050026639	0.5785898030282417	FALSE	FALSE	FALSE
ENOG411CZUW	0	0	0	2	0	1.2888515295454006	0	1.032778154505153	0	1	0.9113556564842066	ENOG411CZUW	147901107, Xelaev18014885m.g	GenBank, Xenbase_9.1	bysl.S	bystin-like [Xenopus laevis], NA	Q13895	BYSL	ENP1	Bystin-like	0.1810540050026639	0.5785898030282417	FALSE	FALSE	FALSE
ENOG411CTF0	0	0	0	2	0	1.2888515295454006	0	1.032778154505153	0	1	0.9113556564842066	ENOG411CTF0	27370919, 291290881, 50418317	GenBank	NA	LOC398543 protein [Xenopus laevis], DEK oncogene [Xenopus laevis]	NA	NA	NA	DEK oncogene	0.1810540050026639	0.5785898030282417	FALSE	FALSE	FALSE
ENOG411D3N1	0	0	0	2	0	1.2888515295454006	0	1.032778154505153	0	1	0.9113556564842066	ENOG411D3N1	148236009, Xelaev18032238m.g	GenBank, Xenbase_9.1	uqcrb.L	MGC85256 protein [Xenopus laevis], NA	P14927	UQCRB	UQBP	component of the ubiquinol-cytochrome c reductase complex (complex III or cytochrome b-c1 complex), which is part of the mitochondrial respiratory chain (By similarity)	0.1810540050026639	0.5785898030282417	FALSE	FALSE	FALSE
ENOG411DFAN	0	0	0	2	0	1.2888515295454006	0	1.032778154505153	0	1	0.9113556564842066	ENOG411DFAN	148229150, 213626618, 49118072, Xelaev18040042m.g	GenBank, Xenbase_9.1	bub1b.L	budding uninhibited by benzimidazoles 1 beta [Xenopus laevis], BUB1 budding uninhibited by benzimidazoles 1 homolog beta (yeast) [Xenopus laevis], Bub1b protein [Xenopus laevis], NA	NA	NA	NA	budding uninhibited by benzimidazoles 1 homolog, beta	0.1810540050026639	0.5785898030282417	FALSE	FALSE	FALSE
ENOG411DFV8	0	0	0	2	0	1.2888515295454006	0	1.032778154505153	0	1	0.9113556564842066	ENOG411DFV8	13021629, Xelaev18044825m.g, Xelaev18047269m.g, Xelaev18047271m.g	GenBank, Xenbase_9.1	unnamed.L, Xelaev18047269m.g, unnamed.S	collagen alpha3(VI) [Xenopus laevis], NA	NA	NA	NA	Collagen, type VI, alpha 3	0.1810540050026639	0.5785898030282417	FALSE	FALSE	FALSE
ENOG411CUDV	0	0	0	2	0	1.2888515295454006	0	1.032778154505153	0	1	0.9113556564842066	ENOG411CUDV	Xelaev18031244m.g	Xenbase_9.1	avl9.L	NA	Q8NBF6	AVL9	KIAA0241	AVL9 homolog (S. cerevisiase)	0.1810540050026639	0.5785898030282417	FALSE	FALSE	FALSE
ENOG411CPWB	0	0	0	2	0	1.2888515295454006	0	1.032778154505153	0	1	0.9113556564842066	ENOG411CPWB	148224602, Xelaev18008366m.g, Xelaev18011020m.g, Xelaev18008365m.g	GenBank, Xenbase_9.1	ugt3a2.L, ugt3a2.S, loc100488328.L	UDP-glucuronosyltransferase 3A1 precursor [Xenopus laevis], NA	Q6NUS8, Q3SY77	UGT3A1, UGT3A2	NA	UDP glycosyltransferase 3 family, polypeptide	0.1810540050026639	0.5785898030282417	FALSE	FALSE	FALSE
ENOG411CRMX	0	0	0	2	0	1.2888515295454006	0	1.032778154505153	0	1	0.9113556564842066	ENOG411CRMX	147903523, Xelaev18019115m.g, Xelaev18025279m.g	GenBank, Xenbase_9.1	cc2d1a.L, cc2d1b.S	coiled-coil and C2 domain-containing protein 1B [Xenopus laevis], NA	Q6P1N0, Q5T0F9	CC2D1A, CC2D1B	AKI1, KIAA1836	coiled-coil and C2 domain containing	0.1810540050026639	0.5785898030282417	FALSE	FALSE	FALSE
ENOG411D6WJ	0	0	0	2	0	1.2888515295454006	0	1.032778154505153	0	1	0.9113556564842066	ENOG411D6WJ	Xelaev18008642m.g	Xenbase_9.1	loc100485792.L	NA	NA	NA	NA	MYSc	0.1810540050026639	0.5785898030282417	FALSE	FALSE	FALSE
ENOG411CV1M	0	0	0	2	0	1.2888515295454006	0	1.032778154505153	0	1	0.9113556564842066	ENOG411CV1M	114107973, 83318227, Xelaev18004430m.g	GenBank, Xenbase_9.1	c19orf52.L	MGC154907 protein [Xenopus laevis], LOC733433 protein [Xenopus laevis], NA	Q9BSF4	TIMM29	c19orf52	Chromosome 19 open reading frame 52	0.1810540050026639	0.5785898030282417	FALSE	FALSE	FALSE
ENOG411CWA3	0	0	0	2	0	1.2888515295454006	0	1.032778154505153	0	1	0.9113556564842066	ENOG411CWA3	147903018, Xelaev18017836m.g	GenBank, Xenbase_9.1	upf2.L	UPF2 regulator of nonsense transcripts homolog [Xenopus laevis], NA	Q9HAU5	UPF2	KIAA1408 RENT2	UPF2 regulator of nonsense transcripts homolog (yeast)	0.1810540050026639	0.5785898030282417	FALSE	FALSE	FALSE
ENOG411CRD9	0	0	0	2	0	1.2888515295454006	0	1.032778154505153	0	1	0.9113556564842066	ENOG411CRD9	Xelaev18035597m.g, Xelaev18037486m.g	Xenbase_9.1	pank4.L, pank4.S	NA	Q9NVE7	PANK4	NA	Pantothenate kinase 4	0.1810540050026639	0.5785898030282417	FALSE	FALSE	FALSE
66910877	5	11	11	19	0.8955237312896192	0.3928826252334893	0.5432913045507928	0.184781247950203	8	15	0.9110408716213426	66910877	NA	GenBank	NA	LOC733268 protein [Xenopus laevis]	NA	NA	NA	NA	0.1811369194862443	0.5785898030282417	FALSE	FALSE	FALSE
ENOG411CY7C	0	2	1	4	0.9226215573892205	0.3626466885734892	0.5432913045507926	0.184781247950203	1	2.5	0.9088218923639714	ENOG411CY7C	148234372, 148235957	GenBank	NA	acidic leucine-rich nuclear phosphoprotein 32 family member E [Xenopus laevis], uncharacterized protein LOC734479 [Xenopus laevis]	Q9BTT0	ANP32E	NA	Acidic leucine-rich nuclear phosphoprotein 32 family member E	0.18172207429740594	0.5785898030282417	FALSE	FALSE	FALSE
ENOG411CSDC	0	2	1	4	0.9226215573892205	0.3626466885734892	0.5432913045507926	0.184781247950203	1	2.5	0.9088218923639714	ENOG411CSDC	Xelaev18006629m.g	Xenbase_9.1	armc6.L	NA	Q6NXE6	ARMC6	NA	armadillo repeat containing 6	0.18172207429740594	0.5785898030282417	FALSE	FALSE	FALSE
ENOG411CXP7	0	2	1	4	0.9226215573892205	0.3626466885734892	0.5432913045507926	0.184781247950203	1	2.5	0.9088218923639714	ENOG411CXP7	147904362, Xelaev18046677m.g	GenBank, Xenbase_9.1	fdxr.S	ferredoxin reductase precursor [Xenopus laevis], NA	P22570	FDXR	ADXR	NADPH adrenodoxin oxidoreductase, mitochondrial	0.18172207429740594	0.5785898030282417	FALSE	FALSE	FALSE
ENOG411CXTN	9	13	12	30	-0.16373446889254062	1.436885588254075	-0.07819707219547765	0.5946570421132681	11	21	0.9002537899757844	ENOG411CXTN	148223229, 148227437, 66269745, 66269747, 66269749, 9247090, Xelaev18021149m.g, Xelaev18024673m.g	GenBank, Xenbase_9.1	nap1l1.S, nap1l4.S	nucleosome assembly protein 1-like 1-A [Xenopus laevis], nucleosome assembly protein 1-like 1-B [Xenopus laevis], nucleosome assembly protein 1 p56B [Xenopus laevis], nucleosome assembly protein 1 p60A [Xenopus laevis], nucleosome assembly protein 1 p56A [Xenopus laevis], nucleosome assembly protein 1 [Xenopus laevis], NA	P55209, Q99733	NAP1L1, NAP1L4	NRP, NAP2	nucleosome assembly protein 1-like	0.18399260329003905	0.5785898030282417	FALSE	FALSE	FALSE
ENOG411CPK0	0	3	4	3	1.8453247825788208	-0.5722440285995495	1.8652193994381552	-0.552184346216003	1.5	3.5	0.9002040341368254	ENOG411CPK0	13991829, Xelaev18030879m.g, Xelaev18044702m.g, Xelaev18032979m.g, Xelaev18047173m.g	GenBank, Xenbase_9.1	ppp1r9a.L, loc100495965-like.L, ppp1r9a.S, loc100495965-like.S	neurabin [Xenopus laevis], NA	NA	NA	NA	Protein phosphatase 1, regulatory subunit	0.18400583985724545	0.5785898030282417	FALSE	FALSE	FALSE
ENOG411CU6V	0	5	1	9	0.9226215573892205	0.34996459717300094	0.5432913045507926	0.184781247950203	2.5	5	0.8998542995350586	ENOG411CU6V	Xelaev18047924m.g	Xenbase_9.1	gaa.S	NA	P10253	GAA	NA	Glucosidase, alpha	0.18409889663323858	0.5785898030282417	FALSE	FALSE	FALSE
ENOG411CYMS	0	1	3	1	1.5980745634395823	-0.3303746194386768	1.5432913045507926	-0.552184346216003	0.5	2	0.8963992269128468	ENOG411CYMS	Xelaev18039124m.g	Xenbase_9.1	vps52.L	NA	Q8N1B4	VPS52	SACM2L	vacuolar protein sorting 52 homolog (S. cerevisiae)	0.18501979003216987	0.5785898030282417	FALSE	FALSE	FALSE
ENOG411CW0H	4	22	14	29	1.8065626587262802	-0.546234314965878	1.1282538052719489	-0.16885570666449734	13	21.5	0.8911867183945905	ENOG411CW0H	14132774, 50418217, Xelaev18011917m.g	GenBank, Xenbase_9.1	pafah1b1.L	LIS1 [Xenopus laevis], Unknown (protein for MGC:80035) [Xenopus laevis], NA	P43034	PAFAH1B1	LIS1 MDCR MDS PAFAHA	Positively regulates the activity of the minus-end directed microtubule motor protein dynein. May enhance dynein- mediated microtubule sliding by targeting dynein to the microtubule plus end. Required for several dynein- and microtubule-dependent processes such as the maintenance of Golgi integrity, the peripheral transport of microtubule fragments and the coupling of the nucleus and centrosome. …	0.18641450423454	0.5785898030282417	FALSE	FALSE	FALSE
ENOG411CTBI	17	33	33	51	1.1487326152584365	0.10766693071332786	0.4608291443588199	0.0607925306747497	25	42	0.8884086388363339	ENOG411CTBI	148229707, 148237169, Xelaev18031324m.g, Xelaev18033323m.g	GenBank, Xenbase_9.1	sdha.L, sdha.S	succinate dehydrogenase [ubiquinone] flavoprotein subunit B, mitochondrial precursor [Xenopus laevis], succinate dehydrogenase [ubiquinone] flavoprotein subunit A, mitochondrial precursor [Xenopus laevis], NA	P31040	SDHA	SDH2 SDHF	succinate dehydrogenase complex, subunit A, flavoprotein (Fp)	0.18716049006572624	0.5785898030282417	FALSE	FALSE	FALSE
ENOG411CS03	0	10	5	11	2.06316626569203	-0.8208094882886092	2.128253805271949	-0.42665346413214417	5	8	0.8784789019550249	ENOG411CS03	147905526, Xelaev18013669m.g	GenBank, Xenbase_9.1	dhrs12.L	dehydrogenase/reductase (SDR family) member 12 [Xenopus laevis], NA	A0PJE2	DHRS12	SDR40C1	dehydrogenase reductase (SDR family) member 12	0.1898419411504937	0.5785898030282417	FALSE	FALSE	FALSE
ENOG411CZ7S	4	11	9	19	0.8459472136748417	0.3928826252334893	0.5432913045507926	0.184781247950203	7.5	14	0.875984979828319	ENOG411CZ7S	183985548, Xelaev18039997m.g	GenBank, Xenbase_9.1	aqr.L	LOC100158447 protein [Xenopus laevis], NA	O60306	AQR	KIAA0560	Aquarius homolog (Mouse)	0.1905190996524396	0.5785898030282417	FALSE	FALSE	FALSE
ENOG411CZ97	12	10	17	23	-0.014400562464796339	1.2493918562026316	0.012776587852012944	0.5733465358678558	11	20	0.8732707185083707	ENOG411CZ97	Xelaev18009523m.g, Xelaev18005855m.g	Xenbase_9.1	loc100490725.S, loc100490725.L	NA	O95210	STBD1	NA	Starch binding domain 1	0.19125776840203534	0.5785898030282417	FALSE	FALSE	FALSE
ENOG411CZ90	1	7	1	19	-0.2764018151375699	1.5036627089054027	-0.45670869544920745	0.7697437486713592	4	10	0.8678045002682977	ENOG411CZ90	148229868, 148230699, Xelaev18021806m.g	GenBank, Xenbase_9.1	api5.L	apoptosis inhibitor 5-A [Xenopus laevis], apoptosis inhibitor 5-B [Xenopus laevis], NA	Q9BZZ5	API5	NA	Apoptosis inhibitor 5	0.19275068299832473	0.5785898030282417	FALSE	FALSE	FALSE
ENOG411CUZ0	10	16	16	31	0.31917417973464357	0.9039330669388225	0.171322527163835	0.36035281253365753	13	23.5	0.8648674282412151	ENOG411CUZ0	Xelaev18002193m.g	Xenbase_9.1	tufm.S	NA	P49411	TUFM	NA	This protein promotes the GTP-dependent binding of aminoacyl-tRNA to the A-site of ribosomes during protein biosynthesis (By similarity)	0.193555778439277	0.5785898030282417	FALSE	FALSE	FALSE
ENOG411CTVH	3	6	7	11	0.7963134688030494	0.4253270047213344	0.5432913045507926	0.22542323244754905	4.5	9	0.8638302630010367	ENOG411CTVH	114107983, Xelaev18012963m.g	GenBank, Xenbase_9.1	mrps9.L	Mrps9 protein [Xenopus laevis], NA	P82933	MRPS9	RPMS9	mitochondrial ribosomal protein S9	0.1938405702805655	0.5785898030282417	FALSE	FALSE	FALSE
ENOG411CYN2	11	12	16	26	0.06033085660730667	1.160598052668242	0.045791645079975934	0.5022634378063733	11.5	21	0.8633271110954355	ENOG411CYN2	116063392, 123910711, 28278772, 61403346, 8886479, Xelaev18032285m.g	GenBank, Xenbase_9.1	eif3e.L	Eif3e-a protein [Xenopus laevis], RecName: Full=Eukaryotic translation initiation factor 3 subunit E-B; Short=eIF3e-B; AltName: Full=Eukaryotic translation initiation factor 3 subunit 6-B, Eif3e-b protein [Xenopus laevis], Int-6 protein [Xenopus laevis], NA	P60228	EIF3E	EIF3S6 INT6	Component of the eukaryotic translation initiation factor 3 (eIF-3) complex, which is required for several steps in the initiation of protein synthesis. The eIF-3 complex associates with the 40S ribosome and facilitates the recruitment of eIF-1, eIF-1A, eIF-2 GTP methionyl-tRNAi and eIF-5 to form the 43S preinitiation complex (43S PIC). The eIF-3 complex stimulates mRNA recruitment to the 43S PIC…	0.19397882109251893	0.5785898030282417	FALSE	FALSE	FALSE
ENOG411CZSG	4	7	7	15	0.3631706119856114	0.8572694095313581	0.22136320966343032	0.447815653783997	5.5	11	0.862981415246105	ENOG411CZSG	147905306, 148230617, Xelaev18021659m.g, Xelaev18024664m.g	GenBank, Xenbase_9.1	tsg101.L, tsg101.S	uncharacterized protein LOC414576 [Xenopus laevis], tumor susceptibility gene 101 [Xenopus laevis], NA	Q99816	TSG101	NA	Tumor susceptibility gene 101	0.1940738425909052	0.5785898030282417	FALSE	FALSE	FALSE
ENOG411DG52	1	0	2	1	0.3070070547330004	0.911348329855701	0.12825380527194893	0.447815653783997	0.5	1.5	0.8615073543378148	ENOG411DG52	148227538, Xelaev18014036m.g, Xelaev18016380m.g, Xelaev18016381m.g	GenBank, Xenbase_9.1	Xelaev18014036m.g, Xelaev18016380m.g, Xelaev18016381m.g	synaptotagmin-like 2 [Xenopus laevis], NA	NA	NA	NA	Synaptotagmin-like 2	0.19447933621411426	0.5785898030282417	FALSE	FALSE	FALSE
ENOG411CURP	5	2	5	10	-0.6181262023657889	1.8350835221119444	-0.4567086954492073	1.3222847717001378	3.5	7.5	0.8605187732071121	ENOG411CURP	Xelaev18044966m.g	Xenbase_9.1	fastkd2.L	NA	Q9NYY8	FASTKD2	KIAA0971	FAST kinase domains 2	0.19475156978711539	0.5785898030282417	FALSE	FALSE	FALSE
ENOG411CUK5	3	8	8	13	1.0374882177512812	0.17875128067373605	0.7132163059931051	0.08524557439928863	5.5	10.5	0.860011196883255	ENOG411CUK5	52138966, Xelaev18034544m.g	GenBank, Xenbase_9.1	acadsb.L	LOC494679 protein [Xenopus laevis], NA	P45954	ACADSB	NA	acyl-CoA dehydrogenase, short branched chain	0.19489143520133037	0.5785898030282417	FALSE	FALSE	FALSE
ENOG411CTFG	4	8	9	14	0.8459472136748417	0.3689758384998695	0.5432913045507926	0.184781247950203	6	11.5	0.8590803288125959	ENOG411CTFG	123896325, Xelaev18009675m.g	GenBank, Xenbase_9.1	ikbkap.S	RecName: Full=Putative elongator complex protein 1; Short=ELP1; AltName: Full=IkappaB kinase complex-associated protein; Short=IKK complex-associated protein, NA	O95163	ELP1	IKAP IKBKAP	Inhibitor of kappa light polypeptide gene enhancer in B-cells, kinase complex-associated protein	0.19514809964323893	0.5785898030282417	FALSE	FALSE	FALSE
ENOG411CV92	19	29	30	52	0.38913477950584147	0.8240560145908867	0.17555952005030573	0.2688455127386775	24	41	0.8578554373788889	ENOG411CV92	147898923, 147903525, Xelaev18022671m.g, Xelaev18024946m.g	GenBank, Xenbase_9.1	kars.L, kars.S	lysyl-tRNA synthetase [Xenopus laevis], NA	Q15046	KARS	KIAA0070	lysyl-tRNA synthetase	0.19548614679591247	0.5785898030282417	FALSE	FALSE	FALSE
ENOG411CUD7	0	2	0	7	0	1.2075138712135043	0	0.8628531530628408	1	3.5	0.8538412467118882	ENOG411CUD7	148229387, Xelaev18024219m.g	GenBank, Xenbase_9.1	naa40.S	N-alpha-acetyltransferase 40, NatD catalytic subunit [Xenopus laevis], NA	Q86UY6	NAA40	NAT11 PATT1	N(alpha)-acetyltransferase 40, NatD catalytic subunit, homolog (S. cerevisiae)	0.19659647854600992	0.5785898030282417	FALSE	FALSE	FALSE
ENOG411CZPW	7	17	13	30	0.626169769074657	0.5697913116784913	0.3506462266083967	0.2320869627285597	12	21.5	0.8456721902357432	ENOG411CZPW	116063396, 148227308, Xelaev18043552m.g, Xelaev18046277m.g	GenBank, Xenbase_9.1	npepl1.L, npepl1.S	Lap-1 protein [Xenopus laevis], aminopeptidase-like 1 [Xenopus laevis], NA	Q8NDH3	NPEPL1	KIAA1974	Aminopeptidase-like 1	0.19886782059895852	0.5785898030282417	FALSE	FALSE	FALSE
ENOG411CYA1	7	17	13	30	0.626169769074657	0.5697913116784913	0.3506462266083967	0.2320869627285597	12	21.5	0.8456721902357432	ENOG411CYA1	11493738, 171846445, 213623734, 67678116, 83318408, Xelaev18014510m.g	GenBank, Xenbase_9.1	pola1.S	DNA polymerase alpha [Xenopus laevis], LOC398200 protein [Xenopus laevis], Unknown (protein for IMAGE:6868894) [Xenopus laevis], Unknown (protein for IMAGE:6640027) [Xenopus laevis], NA	P09884	POLA1	POLA	polymerase (DNA directed), alpha 1, catalytic subunit	0.19886782059895852	0.5785898030282417	FALSE	FALSE	FALSE
ENOG411CTU7	2	3	5	6	0.7507393534712237	0.4441603850723741	0.5432913045507928	0.2551705758416011	2.5	5.5	0.8449217079622106	ENOG411CTU7	46249886, Xelaev18017776m.g, Xelaev18020970m.g	GenBank, Xenbase_9.1	dnajc2.L, dnajc2.S	LOC414559 protein [Xenopus laevis], NA	Q99543	DNAJC2	MPHOSPH11 MPP11 ZRF1	DnaJ (Hsp40) homolog, subfamily C, member 2	0.19907727666846262	0.5785898030282417	FALSE	FALSE	FALSE
ENOG411D0MK	6	7	10	15	0.33636785264797525	0.8572694095313581	0.1953680011304859	0.447815653783997	6.5	12.5	0.8440290023639515	ENOG411D0MK	117667938, 117667940, 147904786, Xelaev18000741m.g, Xelaev18004428m.g	GenBank, Xenbase_9.1	carm1.S, carm1.L	coactivator-associated arginine methyltransferase 1-a [Xenopus laevis], coactivator-associated arginine methyltransferase 1-b [Xenopus laevis], histone-arginine methyltransferase CARM1 [Xenopus laevis], NA	Q86X55	CARM1	PRMT4	Coactivator-associated arginine methyltransferase 1	0.19932659960594573	0.5785898030282417	FALSE	FALSE	FALSE
ENOG411CRDD	5	6	5	19	-0.6181262023657889	1.8091949465516972	-0.4567086954492073	0.9623888266137554	5.5	12	0.842212785873201	ENOG411CRDD	147900121, 49116857, 49522920, 83405077, Xelaev18018090m.g, Xelaev18020737m.g, Xelaev18008187m.g, Xelaev18010913m.g	GenBank, Xenbase_9.1	ap3b2.L, ap3b2.S, ap3b1.L, ap3b1.S	adaptor-related protein complex 3, beta 1 subunit [Xenopus laevis], LOC443663 protein [Xenopus laevis], LOC443724 protein [Xenopus laevis], NA	Q13367, O00203	AP3B2, AP3B1	NA, ADTB3A	Adaptor-related protein complex 3 beta	0.19983442911087554	0.5785898030282417	FALSE	FALSE	FALSE
ENOG411D0JQ	2	0	2	3	-0.39090272923773745	1.5785269911948188	-0.4567086954492073	1.447815653783997	1	2.5	0.8397771691315209	ENOG411D0JQ	147902531, 147904477, Xelaev18016447m.g	GenBank, Xenbase_9.1	ppme1.S	protein phosphatase methylesterase 1 [Xenopus laevis], MGC84679 protein [Xenopus laevis], NA	Q9Y570	PPME1	PME1	Protein phosphatase methylesterase 1	0.20051666836157242	0.5785898030282417	FALSE	FALSE	FALSE
ENOG411CZNJ	4	6	7	13	0.3631706119856114	0.8205413543343527	0.22136320966343032	0.447815653783997	5	10	0.8370107583565088	ENOG411CZNJ	148234718, Xelaev18047775m.g, Xelaev18045534m.g	GenBank, Xenbase_9.1	hagh.S, hagh.L	hydroxyacylglutathione hydrolase [Xenopus laevis], NA	Q16775	HAGH	GLO2 HAGH1	Hydroxyacylglutathione hydrolase	0.20129326039790593	0.5785898030282417	FALSE	FALSE	FALSE
ENOG411CQ1R	2	3	2	11	-0.39090272923773745	1.5741026144820363	-0.4567086954492073	1.032778154505153	2.5	6.5	0.8366486623553885	ENOG411CQ1R	Xelaev18036987m.g	Xenbase_9.1	kif1bp.S	NA	Q96EK5	KIF1BP	KBP KIAA1279	kiaa1279	0.20139504194854238	0.5785898030282417	FALSE	FALSE	FALSE
ENOG411DFDF	5	10	10	18	0.6866102073317849	0.4949804041245136	0.4177604224669338	0.23631154859028514	7.5	14	0.8355107339471076	ENOG411DFDF	Xelaev18007012m.g	Xenbase_9.1	ipo4.L	NA	NA	NA	NA	Importin 4	0.2017151029228366	0.5785898030282417	FALSE	FALSE	FALSE
ENOG411CUMH	30	49	48	82	0.553250769409559	0.62805363011049	0.20380483827912588	0.17899889535619695	39.5	65	0.8353083515461291	ENOG411CUMH	148231181, 148233734, 148237065, 2370591, 2370593, 28278797, Xelaev18027504m.g	GenBank, Xenbase_9.1	eif4a2.L	translation initiation factor eIF4A II [Xenopus laevis], eukaryotic translation initiation factor 4A1 [Xenopus laevis], eukaryotic translation initiation factor 4A2 [Xenopus laevis], translation initiation factor eIF4A I [Xenopus laevis], LOC444845 protein [Xenopus laevis], NA	Q14240, P60842	EIF4A2, EIF4A1	DDX2B EIF4F, DDX2A EIF4A	eukaryotic translation initiation factor	0.2017720581742261	0.5785898030282417	FALSE	FALSE	FALSE
ENOG411CSSN	39	46	55	85	-0.04984345845907274	1.2288938248154277	0.028718131721034334	0.31949155680845753	42.5	70	0.8337145094110617	ENOG411CSSN	147900646, 148228693, Xelaev18016934m.g	GenBank, Xenbase_9.1	hspa9.L	heat shock 70kDa protein 9 (mortalin) [Xenopus laevis], NA	P38646	HSPA9	GRP75 HSPA9B mt-HSP70	heat shock 70kDa protein 9 (mortalin)	0.20222093996835494	0.5785898030282417	FALSE	FALSE	FALSE
ENOG411DF3R	0	1	1	2	0.9226215573892205	0.2564237478929571	0.5432913045507926	0.032778154505153104	0.5	1.5	0.8337109306911908	ENOG411DF3R	Xelaev18034249m.g	Xenbase_9.1	tdrd1.L	NA	NA	NA	NA	tudor domain containing 1	0.20222194853299896	0.5785898030282417	FALSE	FALSE	FALSE
ENOG411CTX0	0	1	1	2	0.9226215573892205	0.2564237478929571	0.5432913045507926	0.032778154505153104	0.5	1.5	0.8337109306911908	ENOG411CTX0	147901488, 159155365, 163915837, 213626157, 47938645, 67678434, Xelaev18020163m.g, Xelaev18047985m.g, Xelaev18018794m.g, Xelaev18001582m.g, Xelaev18001591m.g, Xelaev18001599m.g, Xelaev18047982m.g, Xelaev18001590m.g, Xelaev18047983m.g, Xelaev18001596m.g, Xelaev18001583m.g, Xelaev18001597m.g, Xelaev18001589m.g, Xelaev18001587m.g, Xelaev18047986m.g, Xelaev18001592m.g	GenBank, Xenbase_9.1	loc100496673.S, loc100492292.S, loc100496673.L, rnf112.L, rnf112.1.L, Xelaev18001599m.g, Xelaev18047982m.g, Xetrov90022671m.L, Xelaev18047983m.g, Xelaev18001596m.g, loc100492292.1.L, Xelaev18001597m.g, Xetrov90022668m.L, Xelaev18001587m.g, rnf112.S, Xelaev18001592m.g	ring finger protein 112 [Xenopus laevis], LOC100127269 protein [Xenopus laevis], LOC100137704 protein [Xenopus laevis], Hypothetical protein LOC100127269 [Xenopus laevis], LOC432253 protein [Xenopus laevis], NA	Q9ULX5	RNF112	BFP ZNF179	ring finger protein 112	0.20222194853299896	0.5785898030282417	FALSE	FALSE	FALSE
ENOG411CUAQ	0	1	1	2	0.9226215573892205	0.2564237478929571	0.5432913045507926	0.032778154505153104	0.5	1.5	0.8337109306911908	ENOG411CUAQ	147901705, 147904346, 148229212, 148231692, 83405225, Xelaev18011956m.g, Xelaev18014641m.g, Xelaev18020928m.g, Xelaev18024074m.g	GenBank, Xenbase_9.1	camk1g.L, Xelaev18014641m.g, camk1d.S, camk1.L	MGC82022 protein [Xenopus laevis], calcium/calmodulin-dependent protein kinase I [Xenopus laevis], calcium/calmodulin-dependent protein kinase ID [Xenopus laevis], CaM-KIa protein [Xenopus laevis], NA	Q8IU85, Q96NX5, Q14012	CAMK1D, CAMK1G, CAMK1	CAMKID, CLICK3 VWS1, NA	Calcium calmodulin-dependent protein kinase	0.20222194853299896	0.5785898030282417	FALSE	FALSE	FALSE
ENOG411DDUV	0	1	1	2	0.9226215573892205	0.2564237478929571	0.5432913045507926	0.032778154505153104	0.5	1.5	0.8337109306911908	ENOG411DDUV	Xelaev18003790m.g	Xenbase_9.1	None	NA	NA	NA	NA	NmrA-like family domain containing 1	0.20222194853299896	0.5785898030282417	FALSE	FALSE	FALSE
ENOG411CTDI	0	3	0	9	0	1.1739840646082114	0	0.7697437486713592	1.5	4.5	0.8301320930894122	ENOG411CTDI	115528802	GenBank	NA	MGC68895 protein [Xenopus laevis]	Q8N1G4	LRRC47	KIAA1185	Leucine rich repeat containing 47	0.20323205188764448	0.5785898030282417	FALSE	FALSE	FALSE
ENOG411CW12	1	3	3	6	0.7272110266705417	0.4441603850723741	0.5432913045507926	0.2551705758416011	2	4.5	0.8282846685314753	ENOG411CW12	148222773, Xelaev18043979m.g	GenBank, Xenbase_9.1	pigt.L	phosphatidylinositol glycan anchor biosynthesis, class T precursor [Xenopus laevis], NA	Q969N2	PIGT	NA	phosphatidylinositol glycan anchor biosynthesis, class T	0.2037546516875886	0.5785898030282417	FALSE	FALSE	FALSE
ENOG411DFHA	0	5	3	6	1.5980745634395823	-0.4296080710181086	1.5432913045507926	-0.32979192487955516	2.5	4.5	0.8262305803804837	ENOG411DFHA	Xelaev18025197m.g, Xelaev18023082m.g	Xenbase_9.1	toe1.S, toe1.L	NA	NA	NA	NA	Target of EGR1, member 1 (Nuclear)	0.20433665208408996	0.5785898030282417	FALSE	FALSE	FALSE
ENOG411CU6G	17	18	21	41	-0.47955572847586797	1.6347783477590914	-0.16720207825422231	0.5922055631191716	17.5	31	0.8168657478752525	ENOG411CU6G	148230897, 1490630, 27924242	GenBank	NA	nuclear pore complex protein Nup93 [Xenopus laevis], An4b [Xenopus laevis], Dye protein [Xenopus laevis]	Q8N1F7	NUP93	KIAA0095	Nucleoporin 93kDa	0.20700257694333948	0.5785898030282417	FALSE	FALSE	FALSE
ENOG411CZ9P	2	4	2	13	-0.39090272923773745	1.5362409526750611	-0.4567086954492073	0.9332424809542387	3	7.5	0.8098764245446847	ENOG411CZ9P	148229076, Xelaev18013200m.g	GenBank, Xenbase_9.1	dis3.L	DIS3 mitotic control homolog [Xenopus laevis], NA	Q9Y2L1	DIS3	KIAA1008 RRP44	DIS3 mitotic control homolog (S. cerevisiae)	0.2090056013911538	0.5785898030282417	FALSE	FALSE	FALSE
ENOG411CRWF	6	16	12	27	0.7521771000947303	0.3889062263270554	0.4363761006342806	0.16770773459126173	11	19.5	0.8068677580117474	ENOG411CRWF	148225198	GenBank	NA	phosphatidylinositide phosphatase SAC1 [Xenopus laevis]	Q9NTJ5	SACM1L	KIAA0851	SAC1 suppressor of actin mutations 1-like (yeast)	0.20987133812891984	0.5785898030282417	FALSE	FALSE	FALSE
ENOG411CSGB	10	15	18	26	0.6564301652147699	0.47126283277229997	0.33178719935708084	0.20270315594746552	12.5	22	0.7973993659732448	ENOG411CSGB	116063456, Xelaev18019820m.g, Xelaev18002487m.g	GenBank, Xenbase_9.1	rtcb.S, rtcb.L	MGC154502 protein [Xenopus laevis], NA	Q9Y3I0	RTCB	C22orf28	Catalytic subunit of the tRNA-splicing ligase complex that acts by directly joining spliced tRNA halves to mature-sized tRNAs by incorporating the precursor-derived splice junction phosphate into the mature tRNA as a canonical 3',5'- phosphodiester. May act as a RNA ligase with broad substrate specificity, and may function toward other RNAs (By similarity)	0.21260956369405193	0.5785898030282417	FALSE	FALSE	FALSE
ENOG411CSQG	0	3	2	4	1.3048031678308571	-0.18532537573557067	1.1282538052719489	-0.2302562513286408	1.5	3	0.791590338178321	ENOG411CSQG	148226330, Xelaev18020868m.g, Xelaev18017920m.g	GenBank, Xenbase_9.1	tnpo3.S, tnpo3.L	transportin 3 [Xenopus laevis], NA	Q9Y5L0	TNPO3	IPO12	transportin 3	0.21429979119715536	0.5785898030282417	FALSE	FALSE	FALSE
ENOG411DF3S	2	2	4	5	0.43419275757670456	0.6802222002387145	0.2802568987169987	0.447815653783997	2	4.5	0.788010373727003	ENOG411DF3S	Xelaev18005215m.g	Xenbase_9.1	rfc1.L	NA	P35251	RFC1	RFC140	replication factor C (activator 1) 1, 145kDa	0.21534531900305745	0.5785898030282417	FALSE	FALSE	FALSE
ENOG411CTH9	13	30	22	51	0.5449048782114966	0.5694574229556647	0.25949833855020155	0.19405906153821378	21.5	36.5	0.7879731398539455	ENOG411CTH9	148222118, 148223037, 28302264, Xelaev18021791m.g	GenBank, Xenbase_9.1	ipo7.L	importin 7 [Xenopus laevis], uncharacterized protein LOC431890 [Xenopus laevis], MGC52556 protein [Xenopus laevis], NA	O95373, O15397	IPO7, IPO8	RANBP7, RANBP8	importin	0.2153562086756923	0.5785898030282417	FALSE	FALSE	FALSE
ENOG411CR74	5	13	9	24	0.46407031200880344	0.6497312579007386	0.2802568987169987	0.2843169215011176	9	16.5	0.7875766429792596	ENOG411CR74	148228134, 148235618, Xelaev18036823m.g, Xelaev18034508m.g	GenBank, Xenbase_9.1	loc101730645-like.S, gstk1.L	glutathione S-transferase kappa 1 [Xenopus laevis], uncharacterized protein LOC734753 [Xenopus laevis], NA	Q9Y2Q3	GSTK1	NA	glutathione S-transferase kappa 1	0.21547219067298692	0.5785898030282417	FALSE	FALSE	FALSE
ENOG411CRTV	2	2	5	4	0.7507393534712237	0.3626466885734892	0.5432913045507928	0.184781247950203	2	4.5	0.7872828204082669	ENOG411CRTV	148225528, Xelaev18047506m.g	GenBank, Xenbase_9.1	pdxdc1.S	pyridoxal-dependent decarboxylase domain-containing protein 1 [Xenopus laevis], NA	Q6P474, Q6P996	PDXDC2P, PDXDC1	PDXDC2, KIAA0251	pyridoxal-dependent decarboxylase domain containing 1	0.2155581620795707	0.5785898030282417	FALSE	FALSE	FALSE
ENOG411CXV3	2	1	4	3	0.43419275757670456	0.6777564202914759	0.2802568987169987	0.447815653783997	1.5	3.5	0.7862668040053968	ENOG411CXV3	148233199, 148237753	GenBank	NA	golgi reassembly stacking protein 2, 55kDa [Xenopus laevis], uncharacterized protein LOC734511 [Xenopus laevis]	Q9H8Y8	GORASP2	GOLPH6	Golgi reassembly stacking protein 2, 55kDa	0.215855598033355	0.5785898030282417	FALSE	FALSE	FALSE
ENOG411CZMG	12	17	24	26	1.064021769260429	0.03957977235138201	0.48670777618442546	0.032778154505153104	14.5	25	0.7803641338016393	ENOG411CZMG	111145603, 145337894, Xelaev18046110m.g, Xelaev18043370m.g	GenBank, Xenbase_9.1	nsf.S, nsf.L	N-ethylmaleimide sensitive factor [Xenopus laevis], LOC100049722 protein [Xenopus laevis], NA	P46459	NSF	NA	N-ethylmaleimide-sensitive factor	0.21758828639625744	0.5785898030282417	FALSE	FALSE	FALSE
ENOG411CQ6H	4	6	6	14	0.08909363321863015	1.0035860304707585	0.028718131721034334	0.5473513273349114	5	10	0.7726411998594027	ENOG411CQ6H	147906156, Xelaev18040861m.g, Xelaev18042961m.g	GenBank, Xenbase_9.1	ilf2.L, ilf2.S	interleukin enhancer binding factor 2, 45kDa [Xenopus laevis], NA	Q12905	ILF2	NF45	Interleukin enhancer binding factor 2, 45kDa	0.2198673772622272	0.5785898030282417	FALSE	FALSE	FALSE
ENOG411CQKC	1	5	2	11	0.3070070547330004	0.7830962936544198	0.12825380527194893	0.447815653783997	3	6.5	0.7708194698389064	ENOG411CQKC	147900436, 148234245, 213626342, 50418311, Xelaev18010897m.g, Xelaev18008174m.g, Xelaev18020570m.g, Xelaev18040544m.g	GenBank, Xenbase_9.1	iqgap2.S, iqgap2.L, iqgap1-like.1.S, iqgap3.L	IQ motif containing GTPase activating protein 2 [Xenopus laevis], IQ motif containing GTPase activating protein 1 [Xenopus laevis], XIQGAP1 protein [Xenopus laevis], LOC445857 protein [Xenopus laevis], NA	P46940, Q13576, Q86VI3	IQGAP1, IQGAP2, IQGAP3	KIAA0051, NA	IQ motif containing GTPase activating protein	0.2204069725790377	0.5785898030282417	FALSE	FALSE	FALSE
ENOG411CPHB	7	10	12	19	0.43070701757824775	0.655646547640725	0.24373102269188487	0.31031213003406194	8.5	15.5	0.768167972732518	ENOG411CPHB	147906416, 148229761, 148236103, 60729664, Xelaev18046656m.g, Xelaev18044001m.g, Xelaev18032384m.g	GenBank, Xenbase_9.1	ndrg4.S, ndrg4.L, ndrg1.L	protein NDRG1-B [Xenopus laevis], protein NDRG1-A [Xenopus laevis], protein NDRG3 [Xenopus laevis], N-myc downstream-regulated gene 1 protein - African clawed frog, NA	Q92597, Q9UGV2	NDRG1, NDRG3	CAP43 DRG1 RTP, NA	N-myc downstream regulated 1	0.2211936991523986	0.5785898030282417	FALSE	FALSE	FALSE
ENOG411CQ9Z	2	1	3	4	0.06299406474440446	1.0137891149830645	-0.041671196170363696	0.7697437486713592	1.5	3.5	0.7614006882529062	ENOG411CQ9Z	147904022	GenBank	NA	thioredoxin-related transmembrane protein 2 precursor [Xenopus laevis]	Q9Y320	TMX2	TXNDC14	thioredoxin-related transmembrane protein	0.22320888824652985	0.5785898030282417	FALSE	FALSE	FALSE
ENOG411CP5N	3	4	4	11	-0.09451261085055432	1.164755850329719	-0.1347806005618449	0.7108500596177907	3.5	7.5	0.7567762521547755	ENOG411CP5N	147901994, Xelaev18016359m.g	GenBank, Xenbase_9.1	alg8.S	asparagine-linked glycosylation 8, alpha-1,3-glucosyltransferase homolog [Xenopus laevis], NA	Q9BVK2	ALG8	NA	Asparagine-linked glycosylation 8, alpha-1,3-glucosyltransferase homolog (S. cerevisiae)	0.2245919613019766	0.5785898030282417	FALSE	FALSE	FALSE
ENOG411CW2T	1	4	2	9	0.3070070547330004	0.7455544901221587	0.12825380527194893	0.4478156537839968	2.5	5.5	0.7442734059832713	ENOG411CW2T	Xelaev18011958m.g, Xelaev18014642m.g, Xelaev18012344m.g	Xenbase_9.1	loc100494487.L, loc100494487.S, mov10.L	NA	Q9HCE1	MOV10	KIAA1631	Mov10, Moloney leukemia virus 10, homolog (mouse)	0.22835554334494543	0.5785898030282417	FALSE	FALSE	FALSE
ENOG411CT3E	1	6	4	9	1.0630801652182171	-0.01788333908359408	0.8652193994381551	-0.037611173386244694	3.5	6.5	0.7390657634344487	ENOG411CT3E	114107981, 148235651, 213626071, 27881713, 33416654, Xelaev18027647m.g	GenBank, Xenbase_9.1	smc4.L	Unknown (protein for IMAGE:8329210) [Xenopus laevis], structural maintenance of chromosomes protein 4 [Xenopus laevis], (XCAP-C) [Xenopus laevis], XCAP-C protein [Xenopus laevis], NA	Q9NTJ3	SMC4	CAPC SMC4L1	Structural maintenance of chromosomes	0.22993353248369472	0.5785898030282417	FALSE	FALSE	FALSE
ENOG411CSCK	4	14	10	21	1.06181544693331	-0.0273216459195092	0.6807948283007275	3.566768127755329e-4	9	15.5	0.7314975817923055	ENOG411CSCK	123898906, 62739333, Xelaev18005006m.g	GenBank, Xenbase_9.1	ptcd3.L	RecName: Full=Pentatricopeptide repeat-containing protein 3, mitochondrial; Flags: Precursor, Ptcd3 protein [Xenopus laevis], NA	Q96EY7	PTCD3	MRPS39	Pentatricopeptide repeat domain 3	0.23223764052408588	0.5785898030282417	FALSE	FALSE	FALSE
ENOG411CVJG	6	21	12	34	0.7521771000947303	0.2746509530695126	0.4363761006342806	0.11766705209166604	13.5	23	0.7260770795050168	ENOG411CVJG	148232429, 148234413, 214739, 229891737, 6730350, Xelaev18016045m.g, Xelaev18013580m.g	GenBank, Xenbase_9.1	tarbp2.S, tarbp2.L	RISC-loading complex subunit tarbp2 [Xenopus laevis], protein kinase, interferon-inducible double stranded RNA dependent activator [Xenopus laevis], RNA binding protein [Xenopus laevis], RecName: Full=RISC-loading complex subunit tarbp2, Chain A, Crystal Structure Of A Dsrna-Binding Domain Complexed With Dsrna: Molecular Basis Of Double-Stranded Rna-Protein Interactions, NA	O75569, Q15633	PRKRA, TARBP2	PACT RAX, TRBP	Protein kinase, interferon-inducible double stranded RNA dependent activator	0.2338957596283139	0.5785898030282417	FALSE	FALSE	FALSE
ENOG411D0JS	5	14	6	31	-0.3111469937800581	1.334941325230269	-0.23431627411275957	0.5409250581754783	9.5	18.5	0.723931914308792	ENOG411D0JS	147900772, 148231444, Xelaev18001214m.g	GenBank, Xenbase_9.1	nans.S	N-acetylneuraminic acid synthase [Xenopus laevis], uncharacterized protein LOC432051 [Xenopus laevis], NA	Q9NR45	NANS	SAS	N-acetylneuraminic acid synthase	0.23455376787126392	0.5785898030282417	FALSE	FALSE	FALSE
ENOG411CVXP	5	8	7	18	-0.031523830732240715	1.0544835025276784	-0.041671196170363696	0.5258181657852701	6.5	12.5	0.7233417208069189	ENOG411CVXP	147906799, 148223649, 148227896, 148231603, 66910774, Xelaev18044062m.g, Xelaev18047789m.g, Xelaev18046704m.g, Xelaev18045557m.g	GenBank, Xenbase_9.1	llgl2.L, llgl1.S, llgl2.S, llgl1.L	lethal giant larvae homolog 1 [Xenopus laevis], MGC80416 protein [Xenopus laevis], lethal giant larvae homolog 2 [Xenopus laevis], lethal giant larvae [Xenopus laevis], NA	Q15334, Q6P1M3	LLGL1, LLGL2	DLG4 HUGL HUGL1, NA	Lethal giant larvae homolog	0.23473498334582774	0.5785898030282417	FALSE	FALSE	FALSE
ENOG411D1J3	2	2	3	6	0.06299406474440446	0.9585231467018402	-0.041671196170363696	0.6702080751204449	2	4.5	0.7223217473124119	ENOG411D1J3	Xelaev18038548m.g	Xenbase_9.1	faah2.L	NA	Q6GMR7	FAAH2	AMDD	Fatty acid amide hydrolase 2	0.23504834266239655	0.5785898030282417	FALSE	FALSE	FALSE
ENOG411CPB9	2	2	3	6	0.06299406474440446	0.9585231467018402	-0.041671196170363696	0.6702080751204449	2	4.5	0.7223217473124119	ENOG411CPB9	147899734, 28277328, 351542175, Xelaev18037876m.g	GenBank, Xenbase_9.1	grwd1.S	MGC83609 protein [Xenopus laevis], Grwd-pending-prov protein [Xenopus laevis], glutamate-rich WD repeat containing 1 [Xenopus laevis], NA	Q9BQ67	GRWD1	GRWD KIAA1942 WDR28	Glutamate-rich WD repeat containing 1	0.23504834266239655	0.5785898030282417	FALSE	FALSE	FALSE
ENOG411CSG5	1	3	2	7	0.3070070547330004	0.7095854272972324	0.12825380527194893	0.447815653783997	2	4.5	0.718839437746841	ENOG411CSG5	148226877, 148231597, 148235108, Xelaev18046175m.g, Xelaev18031819m.g	GenBank, Xenbase_9.1	ptpn1.S, ptpn2.L	protein tyrosine phosphatase, non-receptor type 1 [Xenopus laevis], protein tyrosine phosphatase, non-receptor type 2 [Xenopus laevis], NA	P17706, P18031	PTPN2, PTPN1	PTPT, PTP1B	Protein tyrosine phosphatase, non-receptor type	0.23611992756574843	0.5785898030282417	FALSE	FALSE	FALSE
ENOG411CQ9N	1	3	2	7	0.3070070547330004	0.7095854272972324	0.12825380527194893	0.447815653783997	2	4.5	0.718839437746841	ENOG411CQ9N	116487817, 148235419, 6634718, Xelaev18008863m.g, Xelaev18005027m.g	GenBank, Xenbase_9.1	tacc3.S, tacc3.L	Tacc3 protein [Xenopus laevis], transforming acidic coiled-coil-containing protein 3 [Xenopus laevis], CPEB-associated factor Maskin [Xenopus laevis], NA	Q9Y6A5	TACC3	ERIC1	transforming, acidic coiled-coil containing protein 3	0.23611992756574843	0.5785898030282417	FALSE	FALSE	FALSE
ENOG411D31B	1	13	7	15	1.8191648725954959	-0.8035602241413987	1.5432913045507926	-0.3595392682736071	7	11	0.7181409339264718	ENOG411D31B	111598444, Xelaev18025862m.g, Xelaev18023939m.g	GenBank, Xenbase_9.1	loc100493057.S, loc100493057.L	MGC85374 protein [Xenopus laevis], NA	NA	NA	NA	ribosomal protein L32'	0.2363351964845048	0.5785898030282417	FALSE	FALSE	FALSE
ENOG411CS4M	0	1	0	4	0	1.0137891149830645	0	0.7697437486713592	0.5	2	0.7168571578976334	ENOG411CS4M	148231714, 27694942, 49257852, Xelaev18041168m.g, Xelaev18039729m.g, Xelaev18026439m.g, Xelaev18028532m.g	GenBank, Xenbase_9.1	Xelaev18041168m.g, Xelaev18039729m.g, Xelaev18026439m.g, Xelaev18028532m.g	kinesin light chain 1 [Xenopus laevis], LOC398473 protein [Xenopus laevis], Unknown (protein for MGC:84013) [Xenopus laevis], NA	Q07866, Q9NSK0, Q9H0B6	KLC1, KLC4, KLC2	KLC KNS2, KNSL8, NA	Kinesin light chain	0.23673111959607482	0.5785898030282417	FALSE	FALSE	FALSE
ENOG411CZJ5	0	1	0	4	0	1.0137891149830645	0	0.7697437486713592	0.5	2	0.7168571578976334	ENOG411CZJ5	162287121, Xelaev18004815m.g, Xelaev18008815m.g	GenBank, Xenbase_9.1	smox.L, smox.S	spermine oxidase [Xenopus laevis], NA	Q9NWM0	SMOX	C20orf16 SMO	Spermine oxidase	0.23673111959607482	0.5785898030282417	FALSE	FALSE	FALSE
ENOG411CXBN	0	1	0	4	0	1.0137891149830645	0	0.7697437486713592	0.5	2	0.7168571578976334	ENOG411CXBN	Xelaev18006342m.g, Xelaev18009859m.g	Xenbase_9.1	ap3d1.L, ap3d1.S	NA	O14617	AP3D1	NA	Adaptor-related protein complex 3, delta 1 subunit	0.23673111959607482	0.5785898030282417	FALSE	FALSE	FALSE
ENOG411CW0Y	0	1	0	4	0	1.0137891149830645	0	0.7697437486713592	0.5	2	0.7168571578976334	ENOG411CW0Y	147898592, 37590291, Xelaev18039022m.g	GenBank, Xenbase_9.1	htatsf1.L	HIV Tat-specific factor 1 [Xenopus laevis], LOC398736 protein [Xenopus laevis], NA	O43719	HTATSF1	NA	HIV-1 Tat specific factor 1	0.23673111959607482	0.5785898030282417	FALSE	FALSE	FALSE
ENOG411DFA4	0	1	0	4	0	1.0137891149830645	0	0.7697437486713592	0.5	2	0.7168571578976334	ENOG411DFA4	124481695, Xelaev18038454m.g, Xelaev18041797m.g	GenBank, Xenbase_9.1	gapvd1.L, gapvd1.S	Gapvd1 protein [Xenopus laevis], NA	Q14C86	GAPVD1	GAPEX5 KIAA1521 RAP6	GTPase activating protein and VPS9 domains 1	0.23673111959607482	0.5785898030282417	FALSE	FALSE	FALSE
ENOG411CRJF	0	1	0	4	0	1.0137891149830645	0	0.7697437486713592	0.5	2	0.7168571578976334	ENOG411CRJF	147905302, Xelaev18022346m.g, Xelaev18024162m.g	GenBank, Xenbase_9.1	sf1.L, sf1.S	splicing factor 1 [Xenopus laevis], NA	Q15637	SF1	ZFM1 ZNF162	splicing factor 1	0.23673111959607482	0.5785898030282417	FALSE	FALSE	FALSE
ENOG411CZTT	2	6	6	9	1.0284923925464566	-0.01788333908359408	0.7656837258872404	-0.037611173386244694	4	7.5	0.7146085148321082	ENOG411CZTT	147900023, 148225722, Xelaev18006314m.g, Xelaev18009841m.g	GenBank, Xenbase_9.1	anp32c.L, anp32c.S	acidic leucine-rich nuclear phosphoprotein 32 family member B [Xenopus laevis], acidic (leucine-rich) nuclear phosphoprotein 32 family, member C [Xenopus laevis], NA	NA	NA	NA	Acidic leucine-rich nuclear phosphoprotein 32 family member	0.2374254909078443	0.5785898030282417	FALSE	FALSE	FALSE
ENOG411CWMV	5	5	8	11	0.2256469257893089	0.7830962936544198	0.12825380527194893	0.447815653783997	5	9.5	0.7132891709446101	ENOG411CWMV	Xelaev18037226m.g, Xelaev18035130m.g, Xelaev18007922m.g, Xelaev18010715m.g	Xenbase_9.1	osbp.S, osbp.L, osbp2.L, osbp2.S	NA	P22059, Q969R2	OSBP, OSBP2	OSBP1, KIAA1664 ORP4 OSBPL4	Oxysterol binding protein	0.2378334185427263	0.5785898030282417	FALSE	FALSE	FALSE
ENOG411CWRS	4	6	7	12	0.3631706119856114	0.6281830989139404	0.22136320966343032	0.340900449867485	5	9.5	0.7009929315315212	ENOG411CWRS	Xelaev18017693m.g	Xenbase_9.1	selo.L	NA	Q9BVL4	SELENOO	SELO	selenoprotein	0.24165371322207926	0.5785898030282417	FALSE	FALSE	FALSE
ENOG411CY30	1	4	3	7	0.7272110266705417	0.26088224050584113	0.5432913045507926	0.1258875588966346	2.5	5	0.6986874496651914	ENOG411CY30	148228420, 28422157, Xelaev18003366m.g, Xelaev18000373m.g, Xelaev18003528m.g	GenBank, Xenbase_9.1	Xelaev18003366m.g, Xelaev18000373m.g, Xelaev18003528m.g	similar to nucleoporin 214kDa [Xenopus laevis], MGC52541 protein [Xenopus laevis], NA	P35658	NUP214	CAIN CAN KIAA0023	nucleoporin 214kDa	0.24237368944938092	0.5785898030282417	FALSE	FALSE	FALSE
ENOG411D423	2	1	1	8	-0.9840604539735816	1.970867357354635	-1.0416711961703637	1.6177406552263094	1.5	4.5	0.697777853102441	ENOG411D423	Xelaev18021044m.g, Xelaev18017670m.g	Xenbase_9.1	ndufa5.S, ndufa5.L	NA	Q16718	NDUFA5	NA	NADH dehydrogenase (Ubiquinone) 1 alpha subcomplex, 5, 13kDa	0.24265806570213086	0.5785898030282417	FALSE	FALSE	FALSE
ENOG411D3ND	0	4	2	5	1.3048031678308571	-0.3191931010687564	1.1282538052719489	-0.28914994038220937	2	3.5	0.6969315618132073	ENOG411D3ND	284521647	GenBank	NA	dynein, light chain, Tctex-type 1 [Xenopus laevis]	P63172	DYNLT1	TCTEL1 TCTEX-1 TCTEX1	Dynein light chain Tctex-type	0.24292281233634216	0.5785898030282417	FALSE	FALSE	FALSE
ENOG411CWYZ	0	4	2	5	1.3048031678308571	-0.3191931010687564	1.1282538052719489	-0.28914994038220937	2	3.5	0.6969315618132073	ENOG411CWYZ	148228702, 4630799, Xelaev18044412m.g	GenBank, Xenbase_9.1	xrcc5.L	X-ray repair complementing defective repair in Chinese hamster cells 5 [Xenopus laevis], human Ku80 autoantigen homologue [Xenopus laevis], NA	P13010	XRCC5	G22P2	X-ray repair complementing defective repair in Chinese hamster cells 5 (double-strand-break rejoining)	0.24292281233634216	0.5785898030282417	FALSE	FALSE	FALSE
ENOG411CSZS	1	7	2	14	0.3070070547330004	0.6785316651549085	0.12825380527194893	0.3547062493925155	4	8	0.6968811119546496	ENOG411CSZS	148225452, 148235558, Xelaev18025194m.g, Xelaev18023077m.g	GenBank, Xenbase_9.1	urod.S, urod.L	MGC82980 protein [Xenopus laevis], uroporphyrinogen decarboxylase [Xenopus laevis], NA	P06132	UROD	NA	Uroporphyrinogen decarboxylase	0.2429385995790246	0.5785898030282417	FALSE	FALSE	FALSE
ENOG411CQPC	13	16	19	31	0.08033203703709779	0.9039330669388225	0.057864477380551005	0.36035281253365753	14.5	25	0.6959805295066555	ENOG411CQPC	148231863, Xelaev18023189m.g	GenBank, Xenbase_9.1	cpt2.L	carnitine O-palmitoyltransferase 2, mitochondrial precursor [Xenopus laevis], NA	P23786	CPT2	CPT1	Carnitine palmitoyltransferase 2	0.24322051165184286	0.5785898030282417	FALSE	FALSE	FALSE
ENOG411CS84	2	11	7	15	1.277263054586856	-0.2930541166054936	0.9583288038296363	-0.1371468469371592	6.5	11	0.6959408141510315	ENOG411CS84	148237378, Xelaev18031161m.g	GenBank, Xenbase_9.1	lars2.L	leucyl-tRNA synthetase 2, mitochondrial [Xenopus laevis], NA	Q15031	LARS2	KIAA0028	Leucyl-tRNA synthetase 2, mitochondrial	0.2432329479409912	0.5785898030282417	FALSE	FALSE	FALSE
ENOG411D03J	0	1	2	1	1.3048031678308571	-0.3303746194386768	1.1282538052719489	-0.552184346216003	0.5	1.5	0.6890250343498746	ENOG411D03J	Xelaev18042856m.g, Xelaev18040750m.g	Xenbase_9.1	sdhc.S, sdhc.L	NA	NA	NA	NA	Succinate dehydrogenase complex, subunit C, integral membrane protein	0.24540375682926727	0.5785898030282417	FALSE	FALSE	FALSE
ENOG411CSBD	0	1	2	1	1.3048031678308571	-0.3303746194386768	1.1282538052719489	-0.552184346216003	0.5	1.5	0.6890250343498746	ENOG411CSBD	148237743, 28175264, 77748394, Xelaev18042959m.g, Xelaev18040857m.g	GenBank, Xenbase_9.1	chtop.S, chtop.L	chromatin target of PRMT1 [Xenopus laevis], MGC52883 protein [Xenopus laevis], NA	Q9Y3Y2	CHTOP	C1orf77 FOP	Chromatin target of PRMT1	0.24540375682926727	0.5785898030282417	FALSE	FALSE	FALSE
ENOG411CW29	9	15	14	28	0.22842639687113878	0.7382326803027282	0.12825380527194893	0.3057966489115691	12	21	0.6835311885651714	ENOG411CW29	Xelaev18001856m.g	Xenbase_9.1	atg7.L	NA	O95352	ATG7	APG7L	autophagy related 7	0.24713562465800826	0.5785898030282417	FALSE	FALSE	FALSE
ENOG411DFW5	0	2	0	6	0	0.9585231467018402	0	0.6702080751204449	1	3	0.6777782169571391	ENOG411DFW5	Xelaev18039681m.g, Xelaev18041205m.g	Xenbase_9.1	loc100495318-like.L, loc100495318-like.S	NA	O00423	EML1	EMAP1 EMAPL EMAPL1	Echinoderm microtubule associated protein like	0.24895616224906272	0.5785898030282417	FALSE	FALSE	FALSE
ENOG411CVG5	0	2	0	6	0	0.9585231467018402	0	0.6702080751204449	1	3	0.6777782169571391	ENOG411CVG5	148230597, Xelaev18002195m.g, Xelaev18003380m.g, Xelaev18007855m.g, Xelaev18010661m.g	GenBank, Xenbase_9.1	atxn2l.S, atxn2l.L, atxn2.L, atxn2.S	ataxin 2 [Xenopus laevis], NA	Q99700, Q8WWM7	ATXN2, ATXN2L	ATX2 SCA2 TNRC13, A2D A2LG A2LP A2RP	Ataxin 2-like	0.24895616224906272	0.5785898030282417	FALSE	FALSE	FALSE
ENOG411CWBW	0	2	0	6	0	0.9585231467018402	0	0.6702080751204449	1	3	0.6777782169571391	ENOG411CWBW	147905644, Xelaev18034364m.g	GenBank, Xenbase_9.1	rnls.L	renalase, FAD-dependent amine oxidase [Xenopus laevis], NA	Q5VYX0	RNLS	C10orf59	Renalase, FAD-dependent amine oxidase	0.24895616224906272	0.5785898030282417	FALSE	FALSE	FALSE
ENOG411CVFB	21	68	46	91	1.8168344808508592	-0.858356836688322	0.6384485375911328	-0.13714684693715937	44.5	68.5	0.6777460418030368	ENOG411CVFB	147903260, 148237470, Xelaev18013281m.g, Xelaev18023027m.g	GenBank, Xenbase_9.1	sucla2.L, Xelaev18023027m.g	succinate-CoA ligase, ADP-forming, beta subunit [Xenopus laevis], succinate-CoA ligase, GDP-forming, beta subunit [Xenopus laevis], NA	Q96I99, Q9P2R7	SUCLG2, SUCLA2	NA	beta subunit	0.24896636416212412	0.5785898030282417	FALSE	FALSE	FALSE
ENOG411CTC0	3	2	3	8	-0.47877023982170747	1.4337719527834107	-0.45670869544920745	1.032778154505153	2.5	5.5	0.6752881872799891	ENOG411CTC0	Xelaev18038565m.g	Xenbase_9.1	trmt12-like.L	NA	Q53H54	TRMT12	TRM12 TYW2	tRNA methyltransferase 12 homolog (S. cerevisiae)	0.24974634373477902	0.5785898030282417	FALSE	FALSE	FALSE
ENOG411CR9I	57	89	91	138	0.7487088950293098	0.20438686356190583	0.20887226548023333	0.07490363017782968	73	114.5	0.6739404740199852	ENOG411CR9I	148234611, Xelaev18002590m.g, Xelaev18019539m.g	GenBank, Xenbase_9.1	acad9.S, acadvl.L	acyl-CoA dehydrogenase family, member 9 [Xenopus laevis], NA	P49748, Q9H845	ACADVL, ACAD9	VLCAD, NA	acyl-CoA dehydrogenase	0.25017457942911636	0.5785898030282417	FALSE	FALSE	FALSE
ENOG411D159	2	16	7	22	1.277263054586856	-0.32573600100677386	0.9583288038296363	-0.1160852314093296	9	14.5	0.6728312320689314	ENOG411D159	148225879, Xelaev18039850m.g, Xelaev18041101m.g, Xelaev18039640m.g	GenBank, Xenbase_9.1	loc100496148.L, lgals3.S, loc100492447.L	lectin, galactoside-binding, soluble, 3 [Xenopus laevis], NA	P17931	LGALS3	MAC2	Lectin galactoside-binding soluble 3	0.2505273328608716	0.5785898030282417	FALSE	FALSE	FALSE
ENOG411CVRJ	0	4	3	4	1.5980745634395823	-0.6607811131924354	1.5432913045507926	-0.5521843462160032	2	3.5	0.6627665546314935	ENOG411CVRJ	147902004, 148226902, 148235620, 148237173, Xelaev18043576m.g, Xelaev18032064m.g, Xelaev18033752m.g, Xelaev18015091m.g, Xelaev18046307m.g, Xelaev18012082m.g	GenBank, Xenbase_9.1	ythdf1.L, ythdf3.L, ythdf3.S, ythdf2.S, ythdf1.S, ythdf2.L	YTH domain family, member 1 [Xenopus laevis], YTH domain family, member 3 [Xenopus laevis], uncharacterized protein LOC414710 [Xenopus laevis], YTH domain family, member 2 [Xenopus laevis], NA	Q9Y5A9, Q7Z739, Q9BYJ9	YTHDF2, YTHDF3, YTHDF1	HGRG8, NA, C20orf21	YTH domain family, member	0.25374003849234966	0.5785898030282417	FALSE	FALSE	FALSE
ENOG411DF7B	0	0	1	0	0.9226215573892205	0	0.5432913045507926	0	0	0.5	0.6523919596988111	ENOG411DF7B	Xelaev18024480m.g	Xenbase_9.1	ambra1.S	NA	NA	NA	NA	Autophagy beclin-1 regulator 1	0.2570741749224432	0.5785898030282417	FALSE	FALSE	FALSE
ENOG411CPAQ	0	0	1	0	0.9226215573892205	0	0.5432913045507926	0	0	0.5	0.6523919596988111	ENOG411CPAQ	147898855, Xelaev18007803m.g	GenBank, Xenbase_9.1	zcchc8.L	zinc finger CCHC domain-containing protein 8 [Xenopus laevis], NA	Q6NZY4	ZCCHC8	NA	Zinc finger, CCHC domain containing 8	0.2570741749224432	0.5785898030282417	FALSE	FALSE	FALSE
ENOG411CSPQ	0	0	1	0	0.9226215573892205	0	0.5432913045507926	0	0	0.5	0.6523919596988111	ENOG411CSPQ	147904280, Xelaev18046310m.g, Xelaev18043581m.g	GenBank, Xenbase_9.1	arfgap1.S, arfgap1.L	ADP-ribosylation factor GTPase activating protein 1 [Xenopus laevis], NA	Q8N6T3	ARFGAP1	ARF1GAP	ADP-ribosylation factor GTPase activating protein 1	0.2570741749224432	0.5785898030282417	FALSE	FALSE	FALSE
ENOG411CP8T	0	0	1	0	0.9226215573892205	0	0.5432913045507926	0	0	0.5	0.6523919596988111	ENOG411CP8T	147899366	GenBank	NA	methyltransferase like 3 [Xenopus laevis]	Q86U44	METTL3	MTA70	methyltransferase like 3	0.2570741749224432	0.5785898030282417	FALSE	FALSE	FALSE
ENOG411CUJ6	0	0	1	0	0.9226215573892205	0	0.5432913045507926	0	0	0.5	0.6523919596988111	ENOG411CUJ6	147903571, 148235431, Xelaev18033153m.g, Xelaev18031093m.g	GenBank, Xenbase_9.1	cnot10.S, cnot10.L	CCR4-NOT transcription complex subunit 10-A [Xenopus laevis], CCR4-NOT transcription complex subunit 10-B [Xenopus laevis], NA	Q9H9A5	CNOT10	NA	CCR4-NOT transcription complex subunit 10	0.2570741749224432	0.5785898030282417	FALSE	FALSE	FALSE
ENOG411CTHS	0	0	1	0	0.9226215573892205	0	0.5432913045507926	0	0	0.5	0.6523919596988111	ENOG411CTHS	Xelaev18017356m.g, Xelaev18021324m.g	Xenbase_9.1	tcp11l2.L, tcp11l2.S	NA	Q8N4U5	TCP11L2	NA	t-complex 11, testis-specific-like 2	0.2570741749224432	0.5785898030282417	FALSE	FALSE	FALSE
ENOG411CQWE	0	0	1	0	0.9226215573892205	0	0.5432913045507926	0	0	0.5	0.6523919596988111	ENOG411CQWE	1055224, 1531585, 213623438, Xelaev18001836m.g, Xelaev18002582m.g	GenBank, Xenbase_9.1	cnbp.L, cnbp.S	cellular nucleic acid binding protein [Xenopus laevis], CNBP protein [Xenopus laevis], NA	P62633	CNBP	RNF163 ZNF9	CCHC-type zinc finger, nucleic acid binding protein	0.2570741749224432	0.5785898030282417	FALSE	FALSE	FALSE
ENOG411CTZV	0	0	1	0	0.9226215573892205	0	0.5432913045507926	0	0	0.5	0.6523919596988111	ENOG411CTZV	224555762, 54038573, 66911163, Xelaev18017170m.g, Xelaev18021479m.g	GenBank, Xenbase_9.1	rad50.L, rad50.S	Rad50 [Xenopus laevis], LOC495064 protein [Xenopus laevis], NA	Q92878	RAD50	NA	RAD50 homolog (S. cerevisiae)	0.2570741749224432	0.5785898030282417	FALSE	FALSE	FALSE
ENOG411D074	0	0	1	0	0.9226215573892205	0	0.5432913045507926	0	0	0.5	0.6523919596988111	ENOG411D074	125858154, Xelaev18000759m.g	GenBank, Xenbase_9.1	ecsit.S	LOC100037194 protein [Xenopus laevis], NA	Q9BQ95	ECSIT	NA	ECSIT homolog (Drosophila)	0.2570741749224432	0.5785898030282417	FALSE	FALSE	FALSE
ENOG411CPIZ	0	0	1	0	0.9226215573892205	0	0.5432913045507926	0	0	0.5	0.6523919596988111	ENOG411CPIZ	148224784, 148232182, 4033595, Xelaev18006923m.g, Xelaev18010143m.g, Xelaev18006924m.g, Xelaev18010139m.g	GenBank, Xenbase_9.1	tle4.L, tle1.S, tle1.L, tle4.S	MGC83762 protein [Xenopus laevis], transducin-like enhancer of split 4 [Xenopus laevis], groucho protein [Xenopus laevis], NA	Q04727, Q04724, Q04726	TLE4, TLE1, TLE3	GRG4 KIAA1261, NA, KIAA1547	transducin-like enhancer of split	0.2570741749224432	0.5785898030282417	FALSE	FALSE	FALSE
ENOG411CX43	0	0	1	0	0.9226215573892205	0	0.5432913045507926	0	0	0.5	0.6523919596988111	ENOG411CX43	Xelaev18017748m.g	Xenbase_9.1	cog5.L	NA	Q9UP83	COG5	GOLTC1 GTC90	Component of oligomeric golgi complex 5	0.2570741749224432	0.5785898030282417	FALSE	FALSE	FALSE
ENOG411CR5I	0	0	1	0	0.9226215573892205	0	0.5432913045507926	0	0	0.5	0.6523919596988111	ENOG411CR5I	Xelaev18041688m.g, Xelaev18002825m.g, Xelaev18019888m.g, Xelaev18002996m.g	Xenbase_9.1	kdm5c.S, kdm5c.L, kdm5a-like.1.S, kdm5a-like.1.L	NA	P29375, P41229, Q9BY66	KDM5A, KDM5C, KDM5D	JARID1A RBBP2 RBP2, DXS1272E JARID1C SMCX XE169, HY HYA JARID1D KIAA0234 SMCY	lysine (K)-specific demethylase	0.2570741749224432	0.5785898030282417	FALSE	FALSE	FALSE
ENOG411CRUS	0	0	1	0	0.9226215573892205	0	0.5432913045507926	0	0	0.5	0.6523919596988111	ENOG411CRUS	147904684, 148233189, Xelaev18043894m.g	GenBank, Xenbase_9.1	elmo1.L	engulfment and cell motility 2 [Xenopus laevis], engulfment and cell motility 1 [Xenopus laevis], NA	Q96JJ3, Q92556	ELMO2, ELMO1	CED12A KIAA1834, KIAA0281	Engulfment and cell motility	0.2570741749224432	0.5785898030282417	FALSE	FALSE	FALSE
ENOG411D0PE	0	0	1	0	0.9226215573892205	0	0.5432913045507926	0	0	0.5	0.6523919596988111	ENOG411D0PE	125858798, 147907058, 47937763, Xelaev18014144m.g, Xelaev18011718m.g	GenBank, Xenbase_9.1	poldip2.S, poldip2.L	LOC100037208 protein [Xenopus laevis], polymerase (DNA-directed), delta interacting protein 2 [Xenopus laevis], LOC432266 protein [Xenopus laevis], NA	Q9Y2S7	POLDIP2	PDIP38 POLD4	polymerase (DNA-directed), delta interacting protein 2	0.2570741749224432	0.5785898030282417	FALSE	FALSE	FALSE
ENOG411CPUQ	0	0	1	0	0.9226215573892205	0	0.5432913045507926	0	0	0.5	0.6523919596988111	ENOG411CPUQ	141657, 155369227, Xelaev18014102m.g, Xelaev18001390m.g, Xelaev18032683m.g, Xelaev18001406m.g, Xelaev18001375m.g, Xelaev18030460m.g, Xelaev18001451m.g, Xelaev18001445m.g, Xelaev18002321m.g, Xelaev18014100m.g, Xelaev18022174m.g	GenBank, Xenbase_9.1	Xelaev18014102m.g, Xelaev18001390m.g, loc100487805.S, Xelaev18001406m.g, Xelaev18001375m.g, Xelaev18030460m.g, Xelaev18001451m.g, loc101734370.L, Xelaev18002321m.g, Xelaev18014100m.g, loc100497179-like.L	RecName: Full=Gastrula zinc finger protein XlCGF62.1, zinc finger protein [Xenopus laevis], NA	Q15072, P17040, Q6ZN57	ZNF146, ZSCAN20, ZFP2	OZF, KOX29 ZNF31 ZNF360, ZNF751	zinc finger and SCAN domain containing 20	0.2570741749224432	0.5785898030282417	FALSE	FALSE	FALSE
ENOG411CQZ3	0	0	1	0	0.9226215573892205	0	0.5432913045507926	0	0	0.5	0.6523919596988111	ENOG411CQZ3	58578247, Xelaev18027084m.g	GenBank, Xenbase_9.1	reps1.L	RalBP-1 associated Eps-like protein [Xenopus laevis], NA	NA	NA	NA	RALBP1 associated Eps domain containing 1	0.2570741749224432	0.5785898030282417	FALSE	FALSE	FALSE
ENOG411CWTH	0	0	1	0	0.9226215573892205	0	0.5432913045507926	0	0	0.5	0.6523919596988111	ENOG411CWTH	147906041	GenBank	NA	proteasome activator complex subunit 4 [Xenopus laevis]	Q14997	PSME4	KIAA0077	Proteasome (Prosome, macropain) activator subunit 4	0.2570741749224432	0.5785898030282417	FALSE	FALSE	FALSE
ENOG411CRW8	0	0	1	0	0.9226215573892205	0	0.5432913045507926	0	0	0.5	0.6523919596988111	ENOG411CRW8	Xelaev18037817m.g, Xelaev18036092m.g, Xelaev18016617m.g	Xenbase_9.1	loc100495072.S, loc105947855.L, loc100486664.L	NA	Q8N6L0	CCDC155	KASH5	Coiled-coil domain containing 155	0.2570741749224432	0.5785898030282417	FALSE	FALSE	FALSE
ENOG411CS21	0	0	1	0	0.9226215573892205	0	0.5432913045507926	0	0	0.5	0.6523919596988111	ENOG411CS21	40949914, Xelaev18004995m.g, Xelaev18008835m.g	GenBank, Xenbase_9.1	eif2ak3.L, eif2ak3.S	ER-resident kinase PERK [Xenopus laevis], NA	Q9NZJ5	EIF2AK3	PEK PERK	eukaryotic translation initiation factor 2-alpha kinase 3	0.2570741749224432	0.5785898030282417	FALSE	FALSE	FALSE
ENOG411CXEW	0	0	1	0	0.9226215573892205	0	0.5432913045507926	0	0	0.5	0.6523919596988111	ENOG411CXEW	148235411, Xelaev18022241m.g, Xelaev18024209m.g	GenBank, Xenbase_9.1	nxf1.L, nxf1.S	nuclear RNA export factor 1 [Xenopus laevis], NA	Q9UBU9	NXF1	TAP	Nuclear RNA export factor	0.2570741749224432	0.5785898030282417	FALSE	FALSE	FALSE
ENOG411CY09	0	0	1	0	0.9226215573892205	0	0.5432913045507926	0	0	0.5	0.6523919596988111	ENOG411CY09	148222954, 213626773, Xelaev18041941m.g, Xelaev18015716m.g, Xelaev18013198m.g	GenBank, Xenbase_9.1	klf8.S, klf12.S, klf12.L	Kruppel-like factor 8 [Xenopus laevis], AP-2 repressor [Xenopus laevis], NA	O95600, Q9Y4X4	KLF8, KLF12	BKLF3 ZNF741, AP2REP	kruppel-like factor	0.2570741749224432	0.5785898030282417	FALSE	FALSE	FALSE
ENOG411CZ8E	0	0	1	0	0.9226215573892205	0	0.5432913045507926	0	0	0.5	0.6523919596988111	ENOG411CZ8E	148222800, 148231410, Xelaev18028571m.g	GenBank, Xenbase_9.1	loc100493854.S	MGC83705 protein [Xenopus laevis], uncharacterized protein LOC734412 [Xenopus laevis], NA	NA	NA	NA	N-acetylglucosaminyltransferase II (MGAT2)	0.2570741749224432	0.5785898030282417	FALSE	FALSE	FALSE
ENOG411D4FM	0	0	1	0	0.9226215573892205	0	0.5432913045507926	0	0	0.5	0.6523919596988111	ENOG411D4FM	Xelaev18038948m.g	Xenbase_9.1	loc101735011.L	NA	NA	NA	NA	IGc1	0.2570741749224432	0.5785898030282417	FALSE	FALSE	FALSE
ENOG411CRC7	0	0	1	0	0.9226215573892205	0	0.5432913045507926	0	0	0.5	0.6523919596988111	ENOG411CRC7	148229801, 148234540, 27696411, Xelaev18042319m.g, Xelaev18039007m.g	GenBank, Xenbase_9.1	hprt1.S, hprt1.L	hypoxanthine phosphoribosyltransferase 1 [Xenopus laevis], phosphoribosyltransferase domain-containing protein 1 [Xenopus laevis], Hprt protein [Xenopus laevis], NA	Q9NRG1, P00492	PRTFDC1, HPRT1	HHGP, HPRT	Phosphoribosyl transferase domain containing 1	0.2570741749224432	0.5785898030282417	FALSE	FALSE	FALSE
ENOG411CQA9	0	0	1	0	0.9226215573892205	0	0.5432913045507926	0	0	0.5	0.6523919596988111	ENOG411CQA9	Xelaev18027823m.g, Xelaev18027824m.g	Xenbase_9.1	None	NA	Q96RG2	PASK	KIAA0135	PAS domain containing serine threonine kinase	0.2570741749224432	0.5785898030282417	FALSE	FALSE	FALSE
ENOG411CPG8	0	0	1	0	0.9226215573892205	0	0.5432913045507926	0	0	0.5	0.6523919596988111	ENOG411CPG8	1098967, 147900035, 34784582, 399123, Xelaev18029494m.g, Xelaev18018155m.g, Xelaev18020685m.g, Xelaev18046214m.g, Xelaev18027357m.g	GenBank, Xenbase_9.1	bmp5.S, bmp7.2.L, bmp7.2.S, bmp7.1.S, bmp5.L	bone morphogenetic protein 7 [Xenopus laevis], bone morphogenetic protein 7, gene 1 [Xenopus laevis], MGC68434 protein [Xenopus laevis], RecName: Full=Bone morphogenetic protein 7; Short=BMP-7; Short=xBMP7; AltName: Full=Osteogenic protein 1; Short=OP-1; Flags: Precursor, NA	P18075, P22003	BMP7, BMP5	OP1, NA	bone morpho-genetic protein	0.2570741749224432	0.5785898030282417	FALSE	FALSE	FALSE
ENOG411CXRB	0	0	1	0	0.9226215573892205	0	0.5432913045507926	0	0	0.5	0.6523919596988111	ENOG411CXRB	Xelaev18005248m.g	Xenbase_9.1	guf1.L	NA	Q8N442	GUF1	NA	Promotes mitochondrial protein synthesis. May act as a fidelity factor of the translation reaction, by catalyzing a one- codon backward translocation of tRNAs on improperly translocated ribosomes. Binds to mitochondrial ribosomes in a GTP-dependent manner (By similarity)	0.2570741749224432	0.5785898030282417	FALSE	FALSE	FALSE
[truncated: 1,755 more rows]
