# Supplementary material for: Functional partitioning of a liquid-like organelle during assembly of axonemal dyneins
Source: eLife journal article supplement (doi:10.7554/elife.58662), 2020-12-02
Supplement: supp [file elife-58662-supp-v1.zip › elife_poa_e58662_Supplementary_file_3.csv]

accession	ctrl_PSMs_b1	ctrl_PSMs_b2	exp_PSMs_b1	exp_PSMs_b2	PSM_zscore_b1	PSM_zscore_b2	PSM_log2fc_b1	PSM_log2fc_b2	mean_ctrl_PSMs	mean_exp_PSMs	joint_zscore	description	xl_id	xl_id_source	xenla_xen_base_gene_names	xenla_gen_bank_description	human_uni_prot_id	human_gene_names_primary	human_gene_names_synonyms	egg_nog_annotation	pval	fdr_bh	conf_90	conf_95	conf_99
ENOG411CT94	0	0	37	123	6.3632057527198205	10.945599135436412	5.377988054007958	6.853823857537001	0	80	12.239173310650132	ENOG411CT94	21396416, 237511151, Xelaev18012788m.g, Xelaev18030942m.g, Xelaev18044708m.g, Xelaev18046776m.g, Xelaev18047178m.g	GenBank, Xenbase_9.1	loc101730961.L, dnah11.L, dnah11-like.2.L, dnah9.S, dnah11-like.2.S	dynein heavy chain 9 [Xenopus laevis], dynein axonemal heavy chain 11 [Xenopus laevis], NA	Q9NYC9, Q96DT5, Q9UFH2	DNAH9, DNAH11, DNAH17	DNAH17L DNAL1 KIAA0357, NA, DNAHL1 DNEL2	Dynein, axonemal heavy chain	9.598900356546722e-35	8.207059804847447e-32	TRUE	TRUE	TRUE
ENOG411D4D3	0	0	14	54	3.881290227690685	7.222918082530305	4.036951136172892	5.680987260674785	0	34	7.851860995865276	ENOG411D4D3	Xelaev18045439m.g	Xenbase_9.1	loc100492104.L	C16orf71	NA	C16orf71	C16orf71	Nucleoside diphosphate kinase	2.0495433743622272e-15	8.761797925398521e-13	TRUE	TRUE	TRUE
ENOG411DGH7	0	0	4	26	2.0671336608006863	5.003660636912873	2.4519886354517353	4.654515049313594	0	15	4.999806596288429	ENOG411DGH7	148222059, Xelaev18008622m.g	GenBank, Xenbase_9.1	dnai1.L	MGC80975 protein [Xenopus laevis], NA	Q9UI46	DNAI1	NA	Dynein, axonemal, intermediate chain 1	2.86939248021282e-7	8.177768568606537e-5	TRUE	TRUE	TRUE
ENOG411CTMB	0	0	4	13	2.0671336608006863	3.5354268124274926	2.4519886354517353	3.7069824692077296	0	8.5	3.9616085026273575	ENOG411CTMB	148223217, Xelaev18044872m.g	GenBank, Xenbase_9.1	nme9.L	thioredoxin domain containing 6 [Xenopus laevis], NA	Q8N427	NME8	SPTRX2 TXNDC3	NME NM23 family member	3.7223268701674415e-5	0.007956473684982906	TRUE	TRUE	TRUE
ENOG411DGHA	0	0	1	18	1.0324492591630055	4.161344539511751	1.1300605405643729	4.14755506059371	0	9.5	3.6725668151275586	ENOG411DGHA	148236527, Xelaev18046434m.g	GenBank, Xenbase_9.1	dnai2.S	dynein, axonemal, intermediate chain 2 [Xenopus laevis], NA	NA	DNAI2	DNAI2	Dynein, axonemal, intermediate chain 2	1.2006316976305683e-4	0.02053080202948272	TRUE	TRUE	FALSE
ENOG411D0UW	0	3	4	12	2.0671336608006863	2.2128398657147046	2.4519886354517353	1.6000672652912173	1.5	8	3.0263983038979347	ENOG411D0UW	12004636, 148225893, Xelaev18023992m.g	GenBank, Xenbase_9.1	ruvbl1.L	pontin [Xenopus laevis], ruvB-like 1 [Xenopus laevis], NA	Q9Y265	RUVBL1	INO80H NMP238 TIP49 TIP49A	RuvB-like 1 (E. coli)	0.0012374302811701198	0.17633381506674206	FALSE	FALSE	FALSE
ENOG411CXJA	0	7	2	18	1.4606300031204151	2.0393331356154394	1.715023041285529	1.1475550605937106	3.5	10	2.4748476693030756	ENOG411CXJA	114108108, 12004634, 148236729, Xelaev18037847m.g	GenBank, Xenbase_9.1	ruvbl2.S	LOC398205 protein [Xenopus laevis], reptin [Xenopus laevis], RuvB-like protein 2 [Xenopus laevis], NA	Q9Y230	RUVBL2	INO80J TIP48 TIP49B	RuvB-like 2 (E. coli)	0.006664650744361543	0.7351687540695494	FALSE	FALSE	FALSE
ENOG411CUGH	1	6	6	10	2.000480262678541	0.8528653720700381	1.937415462621977	0.5517042437298185	3.5	8	2.017620047399754	ENOG411CUGH	147901580, 27769162, Xelaev18017507m.g, Xelaev18021206m.g	GenBank, Xenbase_9.1	Xelaev18017507m.g, Xelaev18021206m.g	ribosomal protein L18a [Xenopus laevis], RPL18A protein [Xenopus laevis], NA	Q02543	RPL18A	NA	60S ribosomal protein L18a	0.021815423682909126	0.7351687540695494	FALSE	FALSE	FALSE
ENOG411D33H	0	2	2	6	1.4606300031204151	1.3260578902752334	1.715023041285529	1.122019968486573	1	4	1.9704859064705178	ENOG411D33H	109157561, 11513400, 116667159, 122023, 122034, 207008814, 294662522, 296216, 46015078, 90108630, Xelaev18026409m.g, Xelaev18001466m.g, Xelaev18004540m.g, Xelaev18026396m.g, Xelaev18002342m.g, Xelaev18032685m.g	GenBank, Xenbase_9.1	Xelaev18026409m.g, Xelaev18001466m.g, loc100495041.1.S, Xelaev18026396m.g, loc101733171.1.S, Xelaev18032685m.g	Chain H, 2.9 Angstrom X-Ray Structure Of Hybrid Macroh2a Nucleosomes, Chain D, 2.6 A Crystal Structure Of A Nucleosome Core Particle Containing The Variant Histone H2a.Z, Chain D, Crystal Structure Of Nucleosome Core Particle Containing A Poly (Da.Dt) Sequence Element, RecName: Full=Histone H2B 1.1; Short=H2B1.1, RecName: Full=Histone H2B 1.2; Short=H2B1.2, unnamed protein product [Xenopus laevis…	Q5QNW6, Q93079, P23527, P62807, Q16778, O60814, P06899, Q99877, P57053	HIST2H2BF, HIST1H2BH, HIST1H2BO, HIST1H2BC; HIST1H2BE; HIST1H2BF; HIST1H2BG; HIST1H2BI, HIST2H2BE, HIST1H2BK, HIST1H2BJ, HIST1H2BN, H2BFS	NA, H2BFJ, H2BFH H2BFN, H2BFL; H2BFH; H2BFG; H2BFA; H2BFK, H2BFQ, H2BFT HIRIP1, H2BFR, H2BFD	Core component of nucleosome. Nucleosomes wrap and compact DNA into chromatin, limiting DNA accessibility to the cellular machineries which require DNA as a template. Histones thereby play a central role in transcription regulation, DNA repair, DNA replication and chromosomal stability. DNA accessibility is regulated via a complex set of post-translational modifications of histones, also called h…	0.024391354322016154	0.7351687540695494	FALSE	FALSE	FALSE
ENOG411CPR2	0	0	0	8	0	2.7726049609838466	0	3.0695525485924375	0	4	1.960527769463141	ENOG411CPR2	Xelaev18031383m.g, Xelaev18031442m.g	Xenbase_9.1	dnah5.L, loc100488102.L	NA	Q8TE73, Q96JB1	DNAH5, DNAH8	DNAHC5 HL1 KIAA1603, NA	Dynein, axonemal heavy chain	0.024967067750948223	0.7351687540695494	FALSE	FALSE	FALSE
ENOG411CPTT	0	0	1	3	1.0324492591630055	1.697370037703834	1.1300605405643729	1.8996275471501252	0	2	1.9302737362284352	ENOG411CPTT	12002837, 148224574, 28422346, Xelaev18013932m.g, Xelaev18016520m.g	GenBank, Xenbase_9.1	rrm1.L, rrm1.S	ribonucleotide reductase subunit M1 [Xenopus laevis], ribonucleotide reductase M1 [Xenopus laevis], RRM1 protein [Xenopus laevis], NA	P23921	RRM1	RR1	Provides the precursors necessary for DNA synthesis. Catalyzes the biosynthesis of deoxyribonucleotides from the corresponding ribonucleotides (By similarity)	0.026786464733130646	0.7351687540695494	FALSE	FALSE	FALSE
ENOG411DFB2	0	1	1	5	1.0324492591630055	1.5657986521468334	1.1300605405643729	1.4845900478712815	0.5	3	1.8372387172909703	ENOG411DFB2	124504282, 52354828, 83318389, Xelaev18032551m.g, Xelaev18034138m.g	GenBank, Xenbase_9.1	eppk1.L, Xelaev18034138m.g	LOC494814 protein [Xenopus laevis], NA	NA	NA	NA	Plectin repeat	0.033087331163414765	0.7351687540695494	FALSE	FALSE	FALSE
ENOG411CUZ0	0	4	1	10	1.0324492591630055	1.4813584752135962	1.1300605405643729	1.0371310709000603	2	5.5	1.7775304955768862	ENOG411CUZ0	Xelaev18002193m.g	Xenbase_9.1	tufm.S	NA	P49411	TUFM	NA	This protein promotes the GTP-dependent binding of aminoacyl-tRNA to the A-site of ribosomes during protein biosynthesis (By similarity)	0.037740498978934965	0.7351687540695494	FALSE	FALSE	FALSE
ENOG411CWMM	0	0	1	2	1.0324492591630055	1.385815745449537	1.1300605405643729	1.4845900478712815	0	1.5	1.709971583467646	ENOG411CWMM	148237502	GenBank	NA	ribosomal protein S23 [Xenopus laevis]	P62266	RPS23	NA	Ribosomal protein S23	0.04363556395582305	0.7351687540695494	FALSE	FALSE	FALSE
ENOG411CY68	0	0	0	6	0	2.400865215570288	0	2.7069824692077296	0	3	1.6976680746446526	ENOG411CY68	67678259, Xelaev18011539m.g	GenBank, Xenbase_9.1	mrpl39.L	LOC733275 protein [Xenopus laevis], NA	Q9NYK5	MRPL39	C21orf92 MRPL5 RPML5	Mitochondrial ribosomal protein L39	0.044785213275502035	0.7351687540695494	FALSE	FALSE	FALSE
ENOG411CTU7	0	1	1	4	1.0324492591630055	1.2768357360513916	1.1300605405643729	1.2215556420374876	0.5	2.5	1.6329110798084439	ENOG411CTU7	46249886, Xelaev18017776m.g, Xelaev18020970m.g	GenBank, Xenbase_9.1	dnajc2.L, dnajc2.S	LOC414559 protein [Xenopus laevis], NA	Q99543	DNAJC2	MPHOSPH11 MPP11 ZRF1	DnaJ (Hsp40) homolog, subfamily C, member 2	0.05124384976001305	0.7351687540695494	FALSE	FALSE	FALSE
ENOG411CUJ2	0	1	0	8	0	2.2590150902343424	0	2.0695525485924375	0.5	4	1.597364889107444	ENOG411CUJ2	148226825, Xelaev18039228m.g	GenBank, Xenbase_9.1	abcf1.L	ATP-binding cassette sub-family F member 1 [Xenopus laevis], NA	Q8NE71	ABCF1	ABC50	ATP-binding cassette, subfamily F (GCN20), member 1	0.05509219709727993	0.7351687540695494	FALSE	FALSE	FALSE
ENOG411CSAG	0	1	0	8	0	2.2590150902343424	0	2.0695525485924375	0.5	4	1.597364889107444	ENOG411CSAG	120577450, 140245, 140247, 147903761, 27503841, Xelaev18035694m.g, Xelaev18005939m.g	GenBank, Xenbase_9.1	Xelaev18035694m.g, Xelaev18005939m.g	LOC100037035 protein [Xenopus laevis], RecName: Full=Nuclease-sensitive element-binding protein 1; AltName: Full=Y-box transcription factor; AltName: Full=Y-box-binding protein 1; Short=YB-1, RecName: Full=B box-binding protein; AltName: Full=Protein YB3, nuclease-sensitive element-binding protein 1 [Xenopus laevis], Nsep1 protein [Xenopus laevis], NA	P67809	YBX1	NSEP1 YB1	Y box binding protein 1	0.05509219709727993	0.7351687540695494	FALSE	FALSE	FALSE
ENOG411CV76	0	4	2	7	1.4606300031204151	0.7840662561055173	1.715023041285529	0.5776994522627631	2	4.5	1.5872399466027332	ENOG411CV76	148230575, 28278769	GenBank	NA	NADH dehydrogenase (ubiquinone) 1 alpha subcomplex, 9, 39kDa [Xenopus laevis], MGC64316 protein [Xenopus laevis]	Q16795	NDUFA9	NDUFS2L	NADH dehydrogenase (Ubiquinone) 1 alpha subcomplex	0.056229155313215276	0.7351687540695494	FALSE	FALSE	FALSE
ENOG411CRH4	0	0	0	5	0	2.191551782964507	0	2.4845900478712815	0	2.5	1.5496611270556717	ENOG411CRH4	71679822, Xelaev18024803m.g	GenBank, Xenbase_9.1	dnaaf1.S	Chc1-b-prov protein [Xenopus laevis], NA	Q8NEP3	DNAAF1	LRRC50	dynein, axonemal, assembly factor 1	0.06061143648700684	0.7351687540695494	FALSE	FALSE	FALSE
ENOG411DEH7	0	0	0	5	0	2.191551782964507	0	2.4845900478712815	0	2.5	1.5496611270556717	ENOG411DEH7	148225851, 148238112, 76779471, Xelaev18042760m.g, Xelaev18040507m.g	GenBank, Xenbase_9.1	hdgf.S, hdgf.L	hepatoma-derived growth factor [Xenopus laevis], uncharacterized protein LOC432316 [Xenopus laevis], Unknown (protein for MGC:130742) [Xenopus laevis], NA	NA	NA	NA	Hepatoma-derived growth factor	0.06061143648700684	0.7351687540695494	FALSE	FALSE	FALSE
ENOG411CWAB	0	1	1	3	1.0324492591630055	0.9374450100041284	1.1300605405643729	0.8996275471501252	0.5	2	1.3929255959485984	ENOG411CWAB	147899657, Xelaev18024671m.g	GenBank, Xenbase_9.1	cars.S	cysteinyl-tRNA synthetase, cytoplasmic [Xenopus laevis], NA	P49589	CARS	NA	Cysteinyl-tRNA synthetase	0.08182114568979491	0.7351687540695494	FALSE	FALSE	FALSE
ENOG411DG9U	0	0	0	4	0	1.960068790697759	0	2.2215556420374876	0	2	1.385977933494501	ENOG411DG9U	147902571, Xelaev18035836m.g, Xelaev18037633m.g	GenBank, Xenbase_9.1	trim28.L, trim28.S	tripartite motif containing 28 [Xenopus laevis], NA	Q13263	TRIM28	KAP1 RNF96 TIF1B	Nuclear corepressor for KRAB domain-containing zinc finger proteins (KRAB-ZFPs). Mediates gene silencing by recruiting CHD3, a subunit of the nucleosome remodeling and deacetylation (NuRD) complex, and SETDB1 (which specifically methylates histone H3 at 'Lys-9' (H3K9me)) to the promoter regions of KRAB target genes. Enhances transcriptional repression by coordinating the increase in H3K9me, the d…	0.08287682082477896	0.7351687540695494	FALSE	FALSE	FALSE
ENOG411CXZQ	0	0	0	4	0	1.960068790697759	0	2.2215556420374876	0	2	1.385977933494501	ENOG411CXZQ	148226694	GenBank	NA	pyrroline-5-carboxylate reductase family, member 1 [Xenopus laevis]	P32322, Q96C36	PYCR1, PYCR2	NA	Pyrroline-5-carboxylate reductase	0.08287682082477896	0.7351687540695494	FALSE	FALSE	FALSE
ENOG411CYEZ	0	0	0	4	0	1.960068790697759	0	2.2215556420374876	0	2	1.385977933494501	ENOG411CYEZ	147903659, 147904074, 148223613, 27370978, 38014807, 91805313, Xelaev18013725m.g, Xelaev18016180m.g, Xelaev18017182m.g, Xelaev18021470m.g	GenBank, Xenbase_9.1	hsph1.L, hsph1.S, hspa4.L, hspa4.S	heat shock 70kDa protein 4 [Xenopus laevis], heat shock 105kD [Xenopus laevis], Hspa4 protein [Xenopus laevis], LOC398863 protein [Xenopus laevis], heat shock protein 110 [Xenopus laevis], NA	P34932, Q92598, O95757	HSPA4, HSPH1, HSPA4L	APG2, HSP105 HSP110 KIAA0201, APG1 OSP94	heat shock	0.08287682082477896	0.7351687540695494	FALSE	FALSE	FALSE
ENOG411CR3F	0	0	0	4	0	1.960068790697759	0	2.2215556420374876	0	2	1.385977933494501	ENOG411CR3F	Xelaev18002259m.g, Xelaev18001328m.g	Xenbase_9.1	None	NA	NA	NA	NA	Dynamin family	0.08287682082477896	0.7351687540695494	FALSE	FALSE	FALSE
ENOG411D3PM	0	0	0	4	0	1.960068790697759	0	2.2215556420374876	0	2	1.385977933494501	ENOG411D3PM	148225514, Xelaev18038501m.g	GenBank, Xenbase_9.1	pin4.L	protein (peptidylprolyl cis/trans isomerase) NIMA-interacting, 4 (parvulin) [Xenopus laevis], NA	Q9Y237	PIN4	NA	protein (peptidyl-prolyl cis trans isomerase) NIMA-interacting, 4 (parvulin)	0.08287682082477896	0.7351687540695494	FALSE	FALSE	FALSE
ENOG411CWTY	0	0	0	4	0	1.960068790697759	0	2.2215556420374876	0	2	1.385977933494501	ENOG411CWTY	Xelaev18043449m.g, Xelaev18046180m.g	Xenbase_9.1	adnp.L, adnp.S	NA	Q9H2P0	ADNP	ADNP1 KIAA0784	Activity-dependent neuroprotector homeobox	0.08287682082477896	0.7351687540695494	FALSE	FALSE	FALSE
ENOG411CU6G	0	0	0	4	0	1.960068790697759	0	2.2215556420374876	0	2	1.385977933494501	ENOG411CU6G	148230897, 1490630, 27924242	GenBank	NA	nuclear pore complex protein Nup93 [Xenopus laevis], An4b [Xenopus laevis], Dye protein [Xenopus laevis]	Q8N1F7	NUP93	KIAA0095	Nucleoporin 93kDa	0.08287682082477896	0.7351687540695494	FALSE	FALSE	FALSE
ENOG411CQMW	0	0	0	4	0	1.960068790697759	0	2.2215556420374876	0	2	1.385977933494501	ENOG411CQMW	125858778, 68533893, Xelaev18039625m.g	GenBank, Xenbase_9.1	nemf-like.L	LOC733300 protein [Xenopus laevis], NA	O60524	NEMF	SDCCAG1	Nuclear export mediator factor	0.08287682082477896	0.7351687540695494	FALSE	FALSE	FALSE
ENOG411D0RW	0	0	0	4	0	1.960068790697759	0	2.2215556420374876	0	2	1.385977933494501	ENOG411D0RW	10129814, 114401, 147903986, 147904499, 148234585, 28279355, 9837363, Xelaev18019679m.g, Xelaev18029958m.g, Xelaev18001092m.g	GenBank, Xenbase_9.1	Xelaev18019679m.g, atp1b3.S, Xelaev18001092m.g	Na,K-ATPase beta-2 subunit [Xenopus laevis], RecName: Full=Sodium/potassium-transporting ATPase subunit beta-3; AltName: Full=Sodium/potassium-dependent ATPase subunit beta-3; Short=ATPB-3, ATPase, Na+/K+ transporting, beta 2 polypeptide [Xenopus laevis], sodium/potassium-transporting ATPase subunit beta-3 [Xenopus laevis], ATPase, Na+/K+ transporting, beta 3 polypeptide [Xenopus laevis], Atp1b2 …	P14415, P54709	ATP1B2, ATP1B3	NA	ATPase, Na K transporting, beta	0.08287682082477896	0.7351687540695494	FALSE	FALSE	FALSE
ENOG411CPSN	0	0	0	4	0	1.960068790697759	0	2.2215556420374876	0	2	1.385977933494501	ENOG411CPSN	147903615, Xelaev18006059m.g, Xelaev18009608m.g	GenBank, Xenbase_9.1	polr2b.L, polr2b.S	polymerase (RNA) II (DNA directed) polypeptide B, 140kDa [Xenopus laevis], NA	P30876	POLR2B	NA	polymerase (RNA) II (DNA directed) polypeptide B, 140kDa	0.08287682082477896	0.7351687540695494	FALSE	FALSE	FALSE
ENOG411CQPC	0	0	0	4	0	1.960068790697759	0	2.2215556420374876	0	2	1.385977933494501	ENOG411CQPC	148231863, Xelaev18023189m.g	GenBank, Xenbase_9.1	cpt2.L	carnitine O-palmitoyltransferase 2, mitochondrial precursor [Xenopus laevis], NA	P23786	CPT2	CPT1	Carnitine palmitoyltransferase 2	0.08287682082477896	0.7351687540695494	FALSE	FALSE	FALSE
ENOG411D3BP	0	0	0	4	0	1.960068790697759	0	2.2215556420374876	0	2	1.385977933494501	ENOG411D3BP	148232387, Xelaev18023543m.g	GenBank, Xenbase_9.1	ndufa6.L	NADH dehydrogenase (ubiquinone) 1 alpha subcomplex, 6, 14kDa [Xenopus laevis], NA	P56556	NDUFA6	LYRM6 NADHB14	Accessory subunit of the mitochondrial membrane respiratory chain NADH dehydrogenase (Complex I), that is believed to be not involved in catalysis. Complex I functions in the transfer of electrons from NADH to the respiratory chain. The immediate electron acceptor for the enzyme is believed to be ubiquinone	0.08287682082477896	0.7351687540695494	FALSE	FALSE	FALSE
ENOG411D3AR	0	0	0	4	0	1.960068790697759	0	2.2215556420374876	0	2	1.385977933494501	ENOG411D3AR	148230138, Xelaev18011037m.g, Xelaev18008388m.g	GenBank, Xenbase_9.1	sub1.S, sub1.L	SUB1 homolog [Xenopus laevis], NA	P53999	SUB1	PC4 RPO2TC1	SUB1 homolog (S. cerevisiae)	0.08287682082477896	0.7351687540695494	FALSE	FALSE	FALSE
ENOG411CVVM	0	0	0	4	0	1.960068790697759	0	2.2215556420374876	0	2	1.385977933494501	ENOG411CVVM	147904533, Xelaev18019010m.g	GenBank, Xenbase_9.1	cdc37.L	hsp90 co-chaperone Cdc37 [Xenopus laevis], NA	Q16543	CDC37	CDC37A	cell division cycle 37 homolog (S. cerevisiae)	0.08287682082477896	0.7351687540695494	FALSE	FALSE	FALSE
ENOG411CSWI	0	0	0	4	0	1.960068790697759	0	2.2215556420374876	0	2	1.385977933494501	ENOG411CSWI	124481854	GenBank	NA	LOC100037132 protein [Xenopus laevis]	Q5VYK3	ECPAS	ECM29 KIAA0368	kiaa0368	0.08287682082477896	0.7351687540695494	FALSE	FALSE	FALSE
ENOG411D0RV	0	0	0	4	0	1.960068790697759	0	2.2215556420374876	0	2	1.385977933494501	ENOG411D0RV	49670406, Xelaev18021410m.g, Xelaev18017255m.g	GenBank, Xenbase_9.1	rpl26.S, rpl26.L	Unknown (protein for MGC:81816) [Xenopus laevis], NA	P61254, Q9UNX3	RPL26, RPL26L1	NA, RPL26P1	ribosomal protein	0.08287682082477896	0.7351687540695494	FALSE	FALSE	FALSE
ENOG411CRBS	0	0	0	4	0	1.960068790697759	0	2.2215556420374876	0	2	1.385977933494501	ENOG411CRBS	148223856, Xelaev18007955m.g, Xelaev18010738m.g	GenBank, Xenbase_9.1	aldh7a1.L, aldh7a1.S	alpha-aminoadipic semialdehyde dehydrogenase [Xenopus laevis], NA	P49419	ALDH7A1	ATQ1	aldehyde dehydrogenase 7 family, member A1	0.08287682082477896	0.7351687540695494	FALSE	FALSE	FALSE
ENOG411CQ9Z	0	0	0	4	0	1.960068790697759	0	2.2215556420374876	0	2	1.385977933494501	ENOG411CQ9Z	147904022	GenBank	NA	thioredoxin-related transmembrane protein 2 precursor [Xenopus laevis]	Q9Y320	TMX2	TXNDC14	thioredoxin-related transmembrane protein	0.08287682082477896	0.7351687540695494	FALSE	FALSE	FALSE
ENOG411CWMJ	0	0	0	4	0	1.960068790697759	0	2.2215556420374876	0	2	1.385977933494501	ENOG411CWMJ	54311416, Xelaev18027624m.g	GenBank, Xenbase_9.1	serpini2.L	LOC495389 protein [Xenopus laevis], NA	O75830	SERPINI2	MEPI PI14	serpin peptidase inhibitor, clade I (pancpin), member 2	0.08287682082477896	0.7351687540695494	FALSE	FALSE	FALSE
ENOG411CZ5A	3	12	9	13	1.898915934952118	-0.008432539983749446	1.4519886354517353	0.0065427510666371275	7.5	11	1.3367736283026996	ENOG411CZ5A	148223936, Xelaev18021274m.g	GenBank, Xenbase_9.1	slc25a3.S	solute carrier family 25 member 3 [Xenopus laevis], NA	Q00325	SLC25A3	PHC	Solute carrier family 25 (Mitochondrial carrier	0.09064826993210487	0.7351687540695494	FALSE	FALSE	FALSE
ENOG411CXNX	0	6	1	10	1.0324492591630055	0.8528653720700381	1.1300605405643729	0.5517042437298185	3	5.5	1.3331187604151002	ENOG411CXNX	147900738, 148222693, 148229927, 148232978, 148235034, 27370929, Xelaev18010117m.g, Xelaev18006897m.g, Xelaev18006896m.g	GenBank, Xenbase_9.1	Xelaev18010117m.g, anxa8.L, MGC84172.L	annexin A1 [Xenopus laevis], MGC84172 protein [Xenopus laevis], MGC85309 protein [Xenopus laevis], uncharacterized protein LOC379455 [Xenopus laevis], LOC398427 protein [Xenopus laevis], NA	P04083	ANXA1	ANX1 LPC1	annexin A1	0.0912464168806047	0.7351687540695494	FALSE	FALSE	FALSE
ENOG411CYEA	0	1	0	6	0	1.8202159581116761	0	1.7069824692077293	0.5	3	1.2870870472047349	ENOG411CYEA	147899700, 262176855, Xelaev18036194m.g	GenBank, Xenbase_9.1	pold1.L	DNA-directed DNA polymerase delta 1 [Xenopus laevis], DNA polymerase delta [Xenopus laevis], NA	P28340	POLD1	POLD	polymerase (DNA directed), delta 1, catalytic subunit	0.09903197480213119	0.7351687540695494	FALSE	FALSE	FALSE
ENOG411CVAB	0	1	0	6	0	1.8202159581116761	0	1.7069824692077293	0.5	3	1.2870870472047349	ENOG411CVAB	148229789, Xelaev18006652m.g	GenBank, Xenbase_9.1	aldh1b1.L	aldehyde dehydrogenase 2 family (mitochondrial) [Xenopus laevis], NA	F8VP50, P05091, P30837	NA, ALDH2, ALDH1B1	NA, ALDM, ALDH5 ALDHX	Aldehyde dehydrogenase	0.09903197480213119	0.7351687540695494	FALSE	FALSE	FALSE
ENOG411CPSC	0	5	1	8	1.0324492591630055	0.6976837617373065	1.1300605405643729	0.48459004787128135	2.5	4.5	1.2233887914333774	ENOG411CPSC	147906687, Xelaev18017962m.g, Xelaev18016428m.g, Xelaev18014080m.g, Xelaev18014079m.g, Xelaev18017961m.g	GenBank, Xenbase_9.1	loc100498358.L, loc100489234.S, Xelaev18014080m.g, Xelaev18014079m.g, fam115a-like.L	hypothetical protein LOC494989 [Xenopus laevis], NA	A6NFQ2, Q9Y4C2, A0A1B0GVM2	TCAF2, TCAF1, TCAF2C	FAM115C FAM139A, FAM115A KIAA0738, NA	Family with sequence similarity 115, member	0.1105914423996876	0.7351687540695494	FALSE	FALSE	FALSE
ENOG411D4B7	1	4	2	8	0.6653122764971168	1.0337743616704762	0.715023041285529	0.7476244537050754	2.5	5	1.2014356836717586	ENOG411D4B7	147901123	GenBank	NA	ribosomal protein S25 [Xenopus laevis]	P62851	RPS25	NA	ribosomal protein S25	0.11479112058341505	0.7351687540695494	FALSE	FALSE	FALSE
ENOG411CT2D	0	0	0	3	0	1.697370037703834	0	1.8996275471501252	0	1.5	1.200221863843247	ENOG411CT2D	115528668, Xelaev18047477m.g, Xelaev18045124m.g	GenBank, Xenbase_9.1	usp7.S, usp7.L	LOC100158365 protein [Xenopus laevis], NA	Q93009	USP7	HAUSP	ubiquitin specific peptidase 7 (herpes virus-associated)	0.11502659309220711	0.7351687540695494	FALSE	FALSE	FALSE
ENOG411CPS2	0	0	0	3	0	1.697370037703834	0	1.8996275471501252	0	1.5	1.200221863843247	ENOG411CPS2	Xelaev18029561m.g	Xenbase_9.1	eif2b5.S	NA	Q13144	EIF2B5	EIF2BE	eukaryotic translation initiation factor 2B, subunit 5 epsilon, 82kDa	0.11502659309220711	0.7351687540695494	FALSE	FALSE	FALSE
ENOG411CPED	0	0	0	3	0	1.697370037703834	0	1.8996275471501252	0	1.5	1.200221863843247	ENOG411CPED	123899810, 148235491, Xelaev18025338m.g	GenBank, Xenbase_9.1	npl.S	RecName: Full=N-acetylneuraminate lyase A; Short=NALase A; AltName: Full=N-acetylneuraminate pyruvate-lyase A; AltName: Full=N-acetylneuraminic acid aldolase A; AltName: Full=Sialate lyase A; AltName: Full=Sialate-pyruvate lyase A; AltName: Full=Sialic acid aldolase A; AltName: Full=Sialic acid lyase A, N-acetylneuraminate lyase B [Xenopus laevis], NA	Q9BXD5	NPL	C1orf13	N-acetylneuraminate pyruvate lyase (Dihydrodipicolinate synthase)	0.11502659309220711	0.7351687540695494	FALSE	FALSE	FALSE
ENOG411CRFF	0	0	0	3	0	1.697370037703834	0	1.8996275471501252	0	1.5	1.200221863843247	ENOG411CRFF	117558233, 148225023, 171846414, 49117032, 6273357, Xelaev18018997m.g, Xelaev18021625m.g	GenBank, Xenbase_9.1	dnmt1.L, dnmt1.S	LOC100036795 protein [Xenopus laevis], DNA (cytosine-5-)-methyltransferase 1 [Xenopus laevis], Dnmt1 protein [Xenopus laevis], DNA methyltransferase 1 [Xenopus laevis], NA	P26358	DNMT1	AIM CXXC9 DNMT	DNA (Cytosine-5)-methyltransferase 1	0.11502659309220711	0.7351687540695494	FALSE	FALSE	FALSE
ENOG411CQ5R	0	0	0	3	0	1.697370037703834	0	1.8996275471501252	0	1.5	1.200221863843247	ENOG411CQ5R	147901618, Xelaev18032592m.g	GenBank, Xenbase_9.1	abcf2.S	ATP-binding cassette, sub-family F (GCN20), member 2 [Xenopus laevis], NA	Q9UG63	ABCF2	NA	ATP-binding cassette, sub-family F (GCN20), member 2	0.11502659309220711	0.7351687540695494	FALSE	FALSE	FALSE
ENOG411CYEG	0	0	0	3	0	1.697370037703834	0	1.8996275471501252	0	1.5	1.200221863843247	ENOG411CYEG	146286146, 27882652, Xelaev18029801m.g, Xelaev18027710m.g	GenBank, Xenbase_9.1	eif2a.S, eif2a.L	RecName: Full=Eukaryotic translation initiation factor 2A; Short=eIF-2A, Eif2a protein [Xenopus laevis], NA	Q9BY44	EIF2A	NA	Eukaryotic translation initiation factor 2A, 65kDa	0.11502659309220711	0.7351687540695494	FALSE	FALSE	FALSE
ENOG411CX7W	0	0	0	3	0	1.697370037703834	0	1.8996275471501252	0	1.5	1.200221863843247	ENOG411CX7W	147903199, 47507242, Xelaev18022607m.g	GenBank, Xenbase_9.1	dhodh.L	dihydroorotate dehydrogenase (quinone) [Xenopus laevis], LOC432093 protein [Xenopus laevis], NA	Q02127	DHODH	NA	Dihydroorotate dehydrogenase (quinone)	0.11502659309220711	0.7351687540695494	FALSE	FALSE	FALSE
ENOG411CVY2	0	0	0	3	0	1.697370037703834	0	1.8996275471501252	0	1.5	1.200221863843247	ENOG411CVY2	147906160	GenBank	NA	elongator complex protein 3 [Xenopus laevis]	Q9H9T3	ELP3	NA	elongator acetyltransferase complex subunit 3	0.11502659309220711	0.7351687540695494	FALSE	FALSE	FALSE
ENOG411CTA9	0	11	2	13	1.4606300031204151	0.20908474381581085	1.715023041285529	0.12201996848657304	5.5	7.5	1.1806666202057854	ENOG411CTA9	147901189, 148235919, 48734648, Xelaev18032984m.g	GenBank, Xenbase_9.1	slc25a13.S	solute carrier family 25, member 13 (citrin) [Xenopus laevis], solute carrier family 25 (mitochondrial carrier, Aralar), member 12 [Xenopus laevis], LOC443574 protein [Xenopus laevis], NA	O75746, Q9UJS0	SLC25A12, SLC25A13	ARALAR1, ARALAR2	solute carrier family 25 (aspartate glutamate carrier), member	0.11886759341683686	0.7351687540695494	FALSE	FALSE	FALSE
ENOG411CPHJ	1	1	1	5	0.08422900289364679	1.5657986521468334	0.1300605405643729	1.4845900478712815	1	3	1.1667457440244609	ENOG411CPHJ	147905374, 148236815, 50925119, Xelaev18029570m.g, Xelaev18003248m.g	GenBank, Xenbase_9.1	psmd1.S, psmd1.L	uncharacterized protein LOC734707 [Xenopus laevis], proteasome (prosome, macropain) 26S subunit, non-ATPase, 1 [Xenopus laevis], LOC446265 protein [Xenopus laevis], NA	Q99460	PSMD1	NA	Proteasome (Prosome, macropain) 26S subunit, non-ATPase, 1	0.12165653178887768	0.7351687540695494	FALSE	FALSE	FALSE
ENOG411CVBZ	2	12	5	15	1.263433290567004	0.36960899649323764	1.1300605405643729	0.19918782900903323	7	10	1.1547352751446853	ENOG411CVBZ	148231021, Xelaev18015280m.g, Xelaev18007676m.g, Xelaev18010521m.g	GenBank, Xenbase_9.1	cltc.S, cltcl1.L, cltcl1.S	clathrin, heavy chain (Hc) [Xenopus laevis], NA	Q00610, P53675	CLTC, CLTCL1	CLH17 CLTCL2 KIAA0034, CLH22 CLTCL CLTD	Clathrin, heavy	0.12409942472148686	0.7351687540695494	FALSE	FALSE	FALSE
ENOG411CTEU	1	8	2	13	0.6653122764971168	0.9215221704823829	0.715023041285529	0.537057467765417	4.5	7.5	1.1220613980796093	ENOG411CTEU	148224610, 148235594, Xelaev18009122m.g, Xelaev18042210m.g	GenBank, Xenbase_9.1	slc25a4.S, slc25a5.S	adenine nucleotide translocator 2 [Xenopus laevis], solute carrier family 25 (mitochondrial carrier; adenine nucleotide translocator), member 4 [Xenopus laevis], NA	P05141, P12236, P12235	SLC25A5, SLC25A6, SLC25A4	ANT2, ANT3, ANT1	solute carrier family 25 (mitochondrial carrier)	0.13091816766174344	0.7351687540695494	FALSE	FALSE	FALSE
ENOG411D01Y	0	2	0	7	0	1.5770663336542057	0	1.3146650464289689	1	3.5	1.115154298907895	ENOG411D01Y	114209183, 147905614, 2738748, Xelaev18019733m.g, Xelaev18004160m.g, Xelaev18036270m.g	GenBank, Xenbase_9.1	has-rs.S, Xelaev18004160m.g, has1.L	unnamed protein product [Xenopus laevis], hyaluronan synthase-related protein [Xenopus laevis], hyaluronan synthase related sequence protein [Xenopus laevis], NA	Q92839	HAS1	HAS	Hyaluronan synthase 1	0.1323921531596128	0.7351687540695494	FALSE	FALSE	FALSE
ENOG411CVQI	0	2	0	7	0	1.5770663336542057	0	1.3146650464289689	1	3.5	1.115154298907895	ENOG411CVQI	117949815, 148226702, 214931	GenBank	NA	RecName: Full=Mitogen-activated protein kinase 1; Short=MAP kinase 1; Short=MAPK 1; AltName: Full=M phase MAP kinase; AltName: Full=Myelin basic protein kinase; Short=MBP kinase; AltName: Full=Myelin xP42 protein kinase, mitogen-activated protein kinase 1 [Xenopus laevis], myelin basic protein kinase-like protein [Xenopus laevis]	P28482, P27361	MAPK1, MAPK3	ERK2 PRKM1 PRKM2, ERK1 PRKM3	mitogenactivated protein kinase	0.1323921531596128	0.7351687540695494	FALSE	FALSE	FALSE
ENOG411CWQE	2	6	4	9	0.9419135838451803	0.6275771124353471	0.8670261347305791	0.4142007199798836	4	6.5	1.109797514349157	ENOG411CWQE	47507516, 49118966, Xelaev18031826m.g, Xelaev18004721m.g, Xelaev18024887m.g	GenBank, Xenbase_9.1	afg3l2.L, afg3l1p.L, afg3l1p.S	LOC432063 protein [Xenopus laevis], LOC443667 protein [Xenopus laevis], NA	Q9Y4W6	AFG3L2	NA	AFG3 ATPase family member 3-like 2 (S. cerevisiae)	0.13354314533173478	0.7351687540695494	FALSE	FALSE	FALSE
ENOG411CQ47	0	1	0	5	0	1.5657986521468334	0	1.4845900478712815	0.5	2.5	1.107186844905782	ENOG411CQ47	147903725, Xelaev18025457m.g, Xelaev18023410m.g	GenBank, Xenbase_9.1	agl.S, agl.L	amylo-alpha-1, 6-glucosidase, 4-alpha-glucanotransferase [Xenopus laevis], NA	P35573	AGL	GDE	Amylo-alpha-1, 6-glucosidase, 4-alpha-glucanotransferase	0.13410657698404757	0.7351687540695494	FALSE	FALSE	FALSE
ENOG411DB5T	1	4	1	10	0.08422900289364679	1.4813584752135962	0.1300605405643729	1.0371310709000603	2.5	5.5	1.107037522310377	ENOG411DB5T	148230813, 213626348, Xelaev18032736m.g, Xelaev18030528m.g	GenBank, Xenbase_9.1	map4.S, map4.L	microtubule-associated protein 4 [Xenopus laevis], Mtap4 protein [Xenopus laevis], NA	NA	NA	NA	Inherit from biNOG: microtubule-associated protein 4	0.1341388529159086	0.7351687540695494	FALSE	FALSE	FALSE
ENOG411CUG1	0	1	1	2	1.0324492591630055	0.5166149040537386	1.1300605405643729	0.48459004787128135	0.5	1.5	1.0953537743036246	ENOG411CUG1	112419036, 57033170, 76780301, Xelaev18030315m.g	GenBank, Xenbase_9.1	eif2b4.S	LOC496301 protein [Xenopus laevis], NA	Q9UI10	EIF2B4	EIF2BD	Eukaryotic translation initiation factor 2B, subunit 4 delta, 67kDa	0.13668083866148434	0.7351687540695494	FALSE	FALSE	FALSE
ENOG411CVPK	0	1	1	2	1.0324492591630055	0.5166149040537386	1.1300605405643729	0.48459004787128135	0.5	1.5	1.0953537743036246	ENOG411CVPK	111185520, 147900482, Xelaev18030524m.g, Xelaev18032733m.g, Xelaev18013362m.g, Xelaev18015860m.g	GenBank, Xenbase_9.1	smarcc1.L, smarcc1.S, smarcc2.L, smarcc2.S	Smarcc1 protein [Xenopus laevis], SWI/SNF related, matrix associated, actin dependent regulator of chromatin, subfamily c, member 2 [Xenopus laevis], NA	Q92922, Q8TAQ2	SMARCC1, SMARCC2	BAF155, BAF170	SWI SNF related, matrix associated, actin dependent regulator of chromatin, subfamily c, member	0.13668083866148434	0.7351687540695494	FALSE	FALSE	FALSE
ENOG411CTCX	0	4	1	6	1.0324492591630055	0.5122645051968542	1.1300605405643729	0.3850543743203671	2	3.5	1.0922775777710554	ENOG411CTCX	147902669, 148236498, Xelaev18009764m.g	GenBank, Xenbase_9.1	ndufs7.S	MGC85267 protein [Xenopus laevis], NADH dehydrogenase (ubiquinone) Fe-S protein 7, 20kDa (NADH-coenzyme Q reductase) [Xenopus laevis], NA	O75251	NDUFS7	NA	NADH dehydrogenase (ubiquinone) Fe-S protein 7, 20kDa (NADH-coenzyme Q reductase)	0.13735555637318428	0.7351687540695494	FALSE	FALSE	FALSE
ENOG411CWP1	0	4	1	6	1.0324492591630055	0.5122645051968542	1.1300605405643729	0.3850543743203671	2	3.5	1.0922775777710554	ENOG411CWP1	148230841, 2739206, Xelaev18011062m.g	GenBank, Xenbase_9.1	fech.S	ferrochelatase, mitochondrial [Xenopus laevis], ferrochelatase [Xenopus laevis], NA	P22830	FECH	NA	Catalyzes the ferrous insertion into protoporphyrin IX (By similarity)	0.13735555637318428	0.7351687540695494	FALSE	FALSE	FALSE
ENOG411D520	3	12	6	15	1.1548570675791703	0.36960899649323764	0.9374154626219772	0.19918782900903323	7.5	10.5	1.0779602915943653	ENOG411D520	147903391, Xelaev18043695m.g	GenBank, Xenbase_9.1	rpl38.L	ribosomal protein L38 [Xenopus laevis], NA	P63173	RPL38	NA	Ribosomal protein L38	0.14052573857196013	0.7351687540695494	FALSE	FALSE	FALSE
ENOG411CS1T	2	3	2	8	0.11920377284128798	1.400984367039792	0.1300605405643729	1.0695525485924375	2.5	5	1.0749353423892754	ENOG411CS1T	147898604, 148237107, Xelaev18044813m.g	GenBank, Xenbase_9.1	ndufa10.L	NADH dehydrogenase (ubiquinone) 1 alpha subcomplex, 10, 42kDa [Xenopus laevis], NA	O95299	NDUFA10	NA	NADH dehydrogenase ubiquinone 1 alpha subcomplex 10	0.14120183868046418	0.7351687540695494	FALSE	FALSE	FALSE
ENOG411CPVN	3	7	3	14	0.14609973472051171	1.368276453223048	0.1300605405643729	0.8065181427586436	5	8.5	1.0708256717623246	ENOG411CPVN	147903143, 148223673, 27370889, 27881711, Xelaev18005411m.g	GenBank, Xenbase_9.1	hmgb2.L	high mobility group box 2 [Xenopus laevis], HMG-X protein [Xenopus laevis], MGC52825 protein [Xenopus laevis], MGC52578 protein [Xenopus laevis], NA	P26583	HMGB2	HMG2	high mobility group box 2	0.14212391080504885	0.7351687540695494	FALSE	FALSE	FALSE
ENOG411CX71	1	4	2	7	0.6653122764971168	0.7840662561055173	0.715023041285529	0.5776994522627631	2.5	4.5	1.02486538890953	ENOG411CX71	148226986, Xelaev18027786m.g, Xelaev18029862m.g	GenBank, Xenbase_9.1	farsb.L, farsb.S	phenylalanyl-tRNA synthetase, beta subunit [Xenopus laevis], NA	Q9NSD9	FARSB	FARSLB FRSB	Phenylalanyl-tRNA synthetase, beta subunit	0.15271335383711065	0.7351687540695494	FALSE	FALSE	FALSE
ENOG411DFFN	1	2	1	6	0.08422900289364679	1.3260578902752334	0.1300605405643729	1.122019968486573	1.5	3.5	0.9972234255782232	ENOG411DFFN	125890, 125892, 148228012, 28436825, 54311334, 68534045	GenBank	NA	RecName: Full=Lupus La protein homolog A; AltName: Full=La autoantigen homolog A; AltName: Full=La ribonucleoprotein A, RecName: Full=Lupus La protein homolog B; AltName: Full=La autoantigen homolog B; AltName: Full=La ribonucleoprotein B, lupus La protein homolog B [Xenopus laevis], Ssb-b protein [Xenopus laevis], Laa-a protein [Xenopus laevis], Laa-A-prov protein [Xenopus laevis]	NA	NA	NA	Sjogren syndrome antigen B (autoantigen La)	0.15932803637515677	0.7351687540695494	FALSE	FALSE	FALSE
ENOG411CRHM	0	3	0	8	0	1.400984367039792	0	1.0695525485924375	1.5	4	0.9906455462701799	ENOG411CRHM	1199644, 148224437, 171847162, 32822903, 62533184, 83405221, Xelaev18016936m.g	GenBank, Xenbase_9.1	ctnna1.L	alpha(E)-catenin [Xenopus laevis], catenin alpha-2 [Xenopus laevis], Catna1 protein [Xenopus laevis], NA	P35221, P26232, Q9UI47	CTNNA1, CTNNA2, CTNNA3	NA, CAPR	Catenin (Cadherin-associated protein), alpha	0.1609293446447194	0.7351687540695494	FALSE	FALSE	FALSE
ENOG411D35V	0	2	1	3	1.0324492591630055	0.362119689138276	1.1300605405643729	0.314665046428969	1	2	0.9861091601760279	ENOG411D35V	148236211	GenBank	NA	brain protein 44 [Xenopus laevis]	O95563	MPC2	BRP44	mitochondrial pyruvate carrier 2	0.1620397745377427	0.7351687540695494	FALSE	FALSE	FALSE
ENOG411D3KT	0	2	1	3	1.0324492591630055	0.362119689138276	1.1300605405643729	0.314665046428969	1	2	0.9861091601760279	ENOG411D3KT	148230110, Xelaev18015869m.g	GenBank, Xenbase_9.1	rps26.S	ribosomal protein S26 [Xenopus laevis], NA	P62854, Q5JNZ5	RPS26, RPS26P11	NA, RPS26L1	ribosomal protein S26	0.1620397745377427	0.7351687540695494	FALSE	FALSE	FALSE
ENOG411CY0R	0	0	0	2	0	1.385815745449537	0	1.4845900478712815	0	1	0.9799197110824579	ENOG411CY0R	148226567, 148234696, Xelaev18041364m.g	GenBank, Xenbase_9.1	irf2bpl.S	interferon regulatory factor 2-binding protein-like A [Xenopus laevis], interferon regulatory factor 2-binding protein-like B [Xenopus laevis], NA	Q8IU81, Q9H1B7	IRF2BP1, IRF2BPL	NA, C14orf4 EAP1 KIAA1865	Interferon regulatory factor 2 binding	0.16356287617412338	0.7351687540695494	FALSE	FALSE	FALSE
ENOG411CQ9Q	0	0	0	2	0	1.385815745449537	0	1.4845900478712815	0	1	0.9799197110824579	ENOG411CQ9Q	148235969, Xelaev18014219m.g	GenBank, Xenbase_9.1	tomm70a.S	translocase of outer mitochondrial membrane 70 homolog A [Xenopus laevis], NA	O94826	TOMM70	KIAA0719 TOM70 TOMM70A	translocase of outer mitochondrial membrane 70 homolog A (S. cerevisiae)	0.16356287617412338	0.7351687540695494	FALSE	FALSE	FALSE
ENOG411DDPY	0	0	0	2	0	1.385815745449537	0	1.4845900478712815	0	1	0.9799197110824579	ENOG411DDPY	147900941, Xelaev18020009m.g	GenBank, Xenbase_9.1	larp1.S	La ribonucleoprotein domain family, member 1 [Xenopus laevis], NA	NA	NA	NA	DM15	0.16356287617412338	0.7351687540695494	FALSE	FALSE	FALSE
ENOG411CRJ5	0	0	0	2	0	1.385815745449537	0	1.4845900478712815	0	1	0.9799197110824579	ENOG411CRJ5	123904542, 123908012, 147742927, 284520926, 55250671, 56199607, 56199609, Xelaev18013718m.g, Xelaev18009003m.g, Xelaev18016172m.g, Xelaev18005223m.g	GenBank, Xenbase_9.1	pds5b.L, pds5a.S, pds5b.S, pds5a.L	RecName: Full=Sister chromatid cohesion protein PDS5 homolog A-B, RecName: Full=Sister chromatid cohesion protein PDS5 homolog B-A; AltName: Full=Androgen-induced proliferation inhibitor A, RecName: Full=Sister chromatid cohesion protein PDS5 homolog B-B; AltName: Full=Androgen-induced proliferation inhibitor B, sister chromatid cohesion protein PDS5 homolog B-B [Xenopus laevis], Pds5b-b protein …	Q9NTI5, Q29RF7	PDS5B, PDS5A	APRIN AS3 KIAA0979, KIAA0648 PDS5	PDS5, regulator of cohesion maintenance, homolog	0.16356287617412338	0.7351687540695494	FALSE	FALSE	FALSE
ENOG411CT3S	0	0	0	2	0	1.385815745449537	0	1.4845900478712815	0	1	0.9799197110824579	ENOG411CT3S	115527875, Xelaev18039885m.g	GenBank, Xenbase_9.1	rbm25.L	RNPC7 protein [Xenopus laevis], NA	P49756	RBM25	RNPC7	RNA binding motif protein 25	0.16356287617412338	0.7351687540695494	FALSE	FALSE	FALSE
ENOG411CWEZ	0	0	0	2	0	1.385815745449537	0	1.4845900478712815	0	1	0.9799197110824579	ENOG411CWEZ	148224586, Xelaev18010347m.g	GenBank, Xenbase_9.1	sf3a1.S	MGC80562 protein [Xenopus laevis], NA	Q15459	SF3A1	SAP114	splicing factor 3a, subunit 1, 120kDa	0.16356287617412338	0.7351687540695494	FALSE	FALSE	FALSE
ENOG411CYYG	0	0	0	2	0	1.385815745449537	0	1.4845900478712815	0	1	0.9799197110824579	ENOG411CYYG	Xelaev18025004m.g, Xelaev18022820m.g	Xenbase_9.1	sf3b3.S, sf3b3.L	NA	Q15393	SF3B3	KIAA0017 SAP130	Splicing factor 3b, subunit 3, 130kDa	0.16356287617412338	0.7351687540695494	FALSE	FALSE	FALSE
ENOG411D05E	0	0	0	2	0	1.385815745449537	0	1.4845900478712815	0	1	0.9799197110824579	ENOG411D05E	148223013, Xelaev18011280m.g, Xelaev18014441m.g	GenBank, Xenbase_9.1	naa50.L, naa50.S	N-alpha-acetyltransferase 50, NatE catalytic subunit [Xenopus laevis], NA	Q9GZZ1	NAA50	MAK3 NAT13 NAT5	N(Alpha)-acetyltransferase 50, NatE catalytic subunit	0.16356287617412338	0.7351687540695494	FALSE	FALSE	FALSE
ENOG411CX0T	0	0	0	2	0	1.385815745449537	0	1.4845900478712815	0	1	0.9799197110824579	ENOG411CX0T	147901478	GenBank	NA	60S ribosomal export protein NMD3 [Xenopus laevis]	Q96D46	NMD3	NA	NMD3 homolog (S. cerevisiae)	0.16356287617412338	0.7351687540695494	FALSE	FALSE	FALSE
ENOG411DEXA	0	0	0	2	0	1.385815745449537	0	1.4845900478712815	0	1	0.9799197110824579	ENOG411DEXA	147903924, 299029, Xelaev18006931m.g	GenBank, Xenbase_9.1	hnrnpk.L	heterogeneous nuclear ribonucleoprotein K [Xenopus laevis], pre-mRNA binding K protein, hnRNP K [Xenopus laevis, Peptide, 396 aa], NA	NA	NA	NA	heterogeneous nuclear ribonucleoprotein K	0.16356287617412338	0.7351687540695494	FALSE	FALSE	FALSE
ENOG411CQFW	0	0	0	2	0	1.385815745449537	0	1.4845900478712815	0	1	0.9799197110824579	ENOG411CQFW	148231901, Xelaev18023965m.g	GenBank, Xenbase_9.1	uroc1.L	urocanase domain containing 1 [Xenopus laevis], NA	Q96N76	UROC1	NA	urocanate hydratase 1	0.16356287617412338	0.7351687540695494	FALSE	FALSE	FALSE
ENOG411CY71	0	0	0	2	0	1.385815745449537	0	1.4845900478712815	0	1	0.9799197110824579	ENOG411CY71	147899410, Xelaev18046471m.g	GenBank, Xenbase_9.1	aspscr1.S	uncharacterized protein LOC495145 [Xenopus laevis], NA	Q9BZE9	ASPSCR1	ASPL RCC17 TUG UBXD9 UBXN9	Alveolar soft part sarcoma chromosome region, candidate 1	0.16356287617412338	0.7351687540695494	FALSE	FALSE	FALSE
ENOG411CPEK	0	0	0	2	0	1.385815745449537	0	1.4845900478712815	0	1	0.9799197110824579	ENOG411CPEK	116063376, 83318221, Xelaev18035049m.g	GenBank, Xenbase_9.1	Xetrov90018342m.L	LOC733431 protein [Xenopus laevis], NA	P30084	ECHS1	NA	enoyl CoA hydratase, short chain, 1, mitochondrial	0.16356287617412338	0.7351687540695494	FALSE	FALSE	FALSE
ENOG411CZFR	0	0	0	2	0	1.385815745449537	0	1.4845900478712815	0	1	0.9799197110824579	ENOG411CZFR	Xelaev18038546m.g	Xenbase_9.1	aifm1.L	NA	O95831	AIFM1	AIF PDCD8	Apoptosis-inducing factor, mitochondrion-associated, 1	0.16356287617412338	0.7351687540695494	FALSE	FALSE	FALSE
ENOG411CQMF	0	0	0	2	0	1.385815745449537	0	1.4845900478712815	0	1	0.9799197110824579	ENOG411CQMF	148230096, Xelaev18027226m.g, Xelaev18038642m.g	GenBank, Xenbase_9.1	Xelaev18027226m.g, Xelaev18038642m.g	O-linked N-acetylglucosamine (GlcNAc) transferase (UDP-N-acetylglucosamine:polypeptide-N-acetylglucosaminyl transferase) [Xenopus laevis], NA	O15294	OGT	NA	O-linked N-acetylglucosamine (GlcNAc) transferase	0.16356287617412338	0.7351687540695494	FALSE	FALSE	FALSE
ENOG411CRB5	0	0	0	2	0	1.385815745449537	0	1.4845900478712815	0	1	0.9799197110824579	ENOG411CRB5	308153295	GenBank	NA	coenzyme Q3 homolog, methyltransferase [Xenopus laevis]	Q9NZJ6	COQ3	NA	coenzyme Q3 homolog, methyltransferase (S. cerevisiae)	0.16356287617412338	0.7351687540695494	FALSE	FALSE	FALSE
ENOG411D12A	0	0	0	2	0	1.385815745449537	0	1.4845900478712815	0	1	0.9799197110824579	ENOG411D12A	163916115, Xelaev18045501m.g	GenBank, Xenbase_9.1	loc100489456.L	LOC100137635 protein [Xenopus laevis], NA	NA	NA	NA	Astacin (Peptidase family M12A)	0.16356287617412338	0.7351687540695494	FALSE	FALSE	FALSE
ENOG411CQ1P	0	0	0	2	0	1.385815745449537	0	1.4845900478712815	0	1	0.9799197110824579	ENOG411CQ1P	114108120, 116487694, 284925122, 33305500, 47507264, 54035254, 56474875, 77748230, Xelaev18006846m.g, Xelaev18003798m.g, Xelaev18000745m.g, Xelaev18004432m.g	GenBank, Xenbase_9.1	smarca2-like.L, smarca2-like.S, smarca4.S, smarca4.L	LOC432089 protein [Xenopus laevis], Unknown (protein for IMAGE:5078610) [Xenopus laevis], SWI/SNF related, matrix associated, actin dependent regulator of chromatin, subfamily a, member 4 [Xenopus laevis], BRM protein [Xenopus laevis], Unknown (protein for IMAGE:4202564) [Xenopus laevis], Brg1 [Xenopus laevis], Unknown (protein for IMAGE:7974916) [Xenopus laevis], NA	P51532, P51531	SMARCA4, SMARCA2	BAF190A BRG1 SNF2B SNF2L4, BAF190B BRM SNF2A SNF2L2	SWI SNF related matrix associated actin dependent regulator of chromatin subfamily a member	0.16356287617412338	0.7351687540695494	FALSE	FALSE	FALSE
ENOG411CUSR	0	0	0	2	0	1.385815745449537	0	1.4845900478712815	0	1	0.9799197110824579	ENOG411CUSR	Xelaev18001094m.g, Xelaev18023980m.g, Xelaev18019680m.g	Xenbase_9.1	polr2a.S, Xelaev18023980m.g, polr2a.L	NA	P24928	POLR2A	POLR2	polymerase (RNA) II (DNA directed) polypeptide A	0.16356287617412338	0.7351687540695494	FALSE	FALSE	FALSE
ENOG411D52H	0	0	0	2	0	1.385815745449537	0	1.4845900478712815	0	1	0.9799197110824579	ENOG411D52H	148229634, 148234670, Xelaev18015063m.g, Xelaev18012110m.g	GenBank, Xenbase_9.1	hmgn2.S, hmgn2.L	high mobility group nucleosomal binding domain 2 [Xenopus laevis], high mobility group HMG-17 [Xenopus laevis], NA	P05204	HMGN2	HMG17	high mobility group nucleosomal binding domain	0.16356287617412338	0.7351687540695494	FALSE	FALSE	FALSE
ENOG411CQMI	0	0	0	2	0	1.385815745449537	0	1.4845900478712815	0	1	0.9799197110824579	ENOG411CQMI	147900189, 148236625	GenBank	NA	uncharacterized protein LOC494689 precursor [Xenopus laevis], glutathione peroxidase 7 precursor [Xenopus laevis]	Q96SL4	GPX7	GPX6	Glutathione peroxidase 7	0.16356287617412338	0.7351687540695494	FALSE	FALSE	FALSE
ENOG411DFIZ	0	0	0	2	0	1.385815745449537	0	1.4845900478712815	0	1	0.9799197110824579	ENOG411DFIZ	147904846, 313661168, Xelaev18020945m.g, Xelaev18017810m.g	GenBank, Xenbase_9.1	kiaa1324l.S, kiaa1324l.L	UPF0577 protein KIAA1324-like homolog precursor [Xenopus laevis], estrogen-induced gene 121-like protein [Xenopus laevis], NA	NA	NA	NA	KIAA1324-like	0.16356287617412338	0.7351687540695494	FALSE	FALSE	FALSE
ENOG411DFNB	0	0	0	2	0	1.385815745449537	0	1.4845900478712815	0	1	0.9799197110824579	ENOG411DFNB	147904423, 147906675, Xelaev18021487m.g, Xelaev18017158m.g	GenBank, Xenbase_9.1	Xelaev18021487m.g, Xelaev18017158m.g	solute carrier family 22 (organic cation/carnitine transporter), member 5 [Xenopus laevis], solute carrier family 22 member 4 [Xenopus laevis], NA	O76082, Q9H015	SLC22A5, SLC22A4	OCTN2, ETT OCTN1 UT2H	solute carrier family 22 (organic cation	0.16356287617412338	0.7351687540695494	FALSE	FALSE	FALSE
ENOG411CZUT	0	0	0	2	0	1.385815745449537	0	1.4845900478712815	0	1	0.9799197110824579	ENOG411CZUT	147904611, 148237558, Xelaev18045947m.g, Xelaev18030801m.g	GenBank, Xenbase_9.1	lasp1.S, nebl-like.1.L	LIM and SH3 protein 1 [Xenopus laevis], NA	Q14847	LASP1	MLN50	LIM and SH3 protein 1	0.16356287617412338	0.7351687540695494	FALSE	FALSE	FALSE
ENOG411CXP0	0	0	0	2	0	1.385815745449537	0	1.4845900478712815	0	1	0.9799197110824579	ENOG411CXP0	148231899	GenBank	NA	pre-mRNA-splicing factor RBM22 [Xenopus laevis]	Q9NW64	RBM22	ZC3H16	RNA binding motif protein 22	0.16356287617412338	0.7351687540695494	FALSE	FALSE	FALSE
ENOG411CY3K	0	0	0	2	0	1.385815745449537	0	1.4845900478712815	0	1	0.9799197110824579	ENOG411CY3K	148228006, 148235715, 50925006, Xelaev18022960m.g	GenBank, Xenbase_9.1	wls.L	protein wntless homolog B precursor [Xenopus laevis], protein wntless homolog A precursor [Xenopus laevis], MGC83940 protein [Xenopus laevis], NA	Q5T9L3	WLS	C1orf139 GPR177	wntless homolog (Drosophila)	0.16356287617412338	0.7351687540695494	FALSE	FALSE	FALSE
ENOG411CTZE	0	0	0	2	0	1.385815745449537	0	1.4845900478712815	0	1	0.9799197110824579	ENOG411CTZE	148233468, Xelaev18045434m.g	GenBank, Xenbase_9.1	decr2.L	2,4-dienoyl CoA reductase 2, peroxisomal [Xenopus laevis], NA	Q9NUI1	DECR2	PDCR SDR17C1	2,4-dienoyl CoA reductase 2, peroxisomal	0.16356287617412338	0.7351687540695494	FALSE	FALSE	FALSE
ENOG411CQ74	0	0	0	2	0	1.385815745449537	0	1.4845900478712815	0	1	0.9799197110824579	ENOG411CQ74	Xelaev18026574m.g	Xenbase_9.1	loc100485177.L	NA	Q9HDC9	APMAP	C20orf3	adipocyte plasma membrane associated protein	0.16356287617412338	0.7351687540695494	FALSE	FALSE	FALSE
ENOG411CQ69	0	0	0	2	0	1.385815745449537	0	1.4845900478712815	0	1	0.9799197110824579	ENOG411CQ69	148231392, Xelaev18022695m.g	GenBank, Xenbase_9.1	klhdc4.L	kelch domain containing 4 [Xenopus laevis], NA	Q8TBB5	KLHDC4	NA	kelch domain containing 4	0.16356287617412338	0.7351687540695494	FALSE	FALSE	FALSE
ENOG411CUEX	0	0	0	2	0	1.385815745449537	0	1.4845900478712815	0	1	0.9799197110824579	ENOG411CUEX	148233872	GenBank	NA	WD repeat-containing protein 92 [Xenopus laevis]	Q96MX6	WDR92	NA	WD repeat-containing protein	0.16356287617412338	0.7351687540695494	FALSE	FALSE	FALSE
ENOG411CX1E	0	0	0	2	0	1.385815745449537	0	1.4845900478712815	0	1	0.9799197110824579	ENOG411CX1E	147905965, Xelaev18009148m.g	GenBank, Xenbase_9.1	spcs3.S	signal peptidase complex subunit 3 homolog [Xenopus laevis], NA	P61009	SPCS3	SPC22	Signal peptidase complex subunit 3 homolog (S. cerevisiae)	0.16356287617412338	0.7351687540695494	FALSE	FALSE	FALSE
ENOG411CWER	0	0	0	2	0	1.385815745449537	0	1.4845900478712815	0	1	0.9799197110824579	ENOG411CWER	125654, 147905211, 148224421, 148233173, 148235142, 148236905, 213623836, 241260, 38175247, 51258561, 52145402, Xelaev18001868m.g, Xelaev18019800m.g, Xelaev18002603m.g	GenBank, Xenbase_9.1	raf1.L, braf.S, raf1.S	RecName: Full=RAF proto-oncogene serine/threonine-protein kinase; AltName: Full=C-RAF, v-raf murine sarcoma 3611 viral oncogene homolog [Xenopus laevis], MGC86346 protein [Xenopus laevis], RAF proto-oncogene serine/threonine-protein kinase [Xenopus laevis], B-Raf [Xenopus laevis], BRAF protein [Xenopus laevis], raf protein [Xenopus laevis], serine/threonine protein kinase ARAF [Xenopus laevis], NA	P15056, P04049, P10398	BRAF, RAF1, ARAF	BRAF1 RAFB1, RAF, ARAF1 PKS PKS2	viral oncogene homolog	0.16356287617412338	0.7351687540695494	FALSE	FALSE	FALSE
ENOG411CUDK	0	0	0	2	0	1.385815745449537	0	1.4845900478712815	0	1	0.9799197110824579	ENOG411CUDK	148232668, 148234128, Xelaev18014517m.g, Xelaev18011786m.g	GenBank, Xenbase_9.1	prdx4.S, prdx4.L	peroxiredoxin 4 precursor [Xenopus laevis], uncharacterized protein LOC496089 precursor [Xenopus laevis], NA	Q13162	PRDX4	NA	Peroxiredoxin 4	0.16356287617412338	0.7351687540695494	FALSE	FALSE	FALSE
ENOG411CQ39	0	0	0	2	0	1.385815745449537	0	1.4845900478712815	0	1	0.9799197110824579	ENOG411CQ39	148228342, Xelaev18002032m.g, Xelaev18019805m.g, Xelaev18002475m.g	GenBank, Xenbase_9.1	Xelaev18002032m.g, Xelaev18019805m.g, Xelaev18002475m.g	nucleoporin 205kDa [Xenopus laevis], NA	Q92621	NUP205	C7orf14 KIAA0225	nucleoporin 205kDa	0.16356287617412338	0.7351687540695494	FALSE	FALSE	FALSE
ENOG411CUJM	0	0	0	2	0	1.385815745449537	0	1.4845900478712815	0	1	0.9799197110824579	ENOG411CUJM	148222466, 7239236, Xelaev18033572m.g, Xelaev18033571m.g	GenBank, Xenbase_9.1	rnmt.S, Xelaev18033571m.g	mRNA cap guanine-N7 methyltransferase [Xenopus laevis], mRNA (guanine-7-)-methyltransferase [Xenopus laevis], NA	O43148	RNMT	KIAA0398	RNA (guanine-7-) methyltransferase	0.16356287617412338	0.7351687540695494	FALSE	FALSE	FALSE
ENOG411CYQ9	0	0	0	2	0	1.385815745449537	0	1.4845900478712815	0	1	0.9799197110824579	ENOG411CYQ9	Xelaev18042414m.g	Xenbase_9.1	hsd17b8.S	NA	Q92506	HSD17B8	FABGL HKE6 RING2 SDR30C1	hydroxysteroid (17-beta) dehydrogenase 8	0.16356287617412338	0.7351687540695494	FALSE	FALSE	FALSE
ENOG411CQAI	0	0	0	2	0	1.385815745449537	0	1.4845900478712815	0	1	0.9799197110824579	ENOG411CQAI	120538242, 147899310	GenBank	NA	LOC100036853 protein [Xenopus laevis], replication protein A2, 32kDa [Xenopus laevis]	P15927, Q13156	RPA2, RPA4	REPA2 RPA32 RPA34, NA	Replication protein	0.16356287617412338	0.7351687540695494	FALSE	FALSE	FALSE
ENOG411CX4E	0	0	0	2	0	1.385815745449537	0	1.4845900478712815	0	1	0.9799197110824579	ENOG411CX4E	148235293, 148238171	GenBank	NA	copine I [Xenopus laevis], MGC82415 protein [Xenopus laevis]	Q99829	CPNE1	CPN1	RNA binding motif protein 12	0.16356287617412338	0.7351687540695494	FALSE	FALSE	FALSE
ENOG411CSIA	0	0	0	2	0	1.385815745449537	0	1.4845900478712815	0	1	0.9799197110824579	ENOG411CSIA	123903949, 148236751, 47939990, 49118984, Xelaev18039283m.g	GenBank, Xenbase_9.1	yif1b.L	RecName: Full=Protein YIF1B-B; AltName: Full=YIP1-interacting factor homolog B-B, protein YIF1B-A [Xenopus laevis], LOC432153 protein [Xenopus laevis], LOC443676 protein [Xenopus laevis], NA	Q5BJH7	YIF1B	NA	Yip1 interacting factor homolog B (S. cerevisiae)	0.16356287617412338	0.7351687540695494	FALSE	FALSE	FALSE
ENOG411CS1Q	0	0	0	2	0	1.385815745449537	0	1.4845900478712815	0	1	0.9799197110824579	ENOG411CS1Q	148224138, 148230905, 148232670, 160420263, 169643250, 169643252, 2660696, 51704114, Xelaev18014042m.g, Xelaev18042126m.g, Xelaev18027934m.g, Xelaev18016421m.g, Xelaev18029965m.g	GenBank, Xenbase_9.1	pak1.L, pak3.S, pak2.L, pak1.S, pak2.S	uncharacterized protein LOC398782 [Xenopus laevis], p21-activated kinase 3 [Xenopus laevis], p21-activated kinase 1 [Xenopus laevis], p21-activated kinase 2 [Xenopus laevis], PAK3a protein [Xenopus laevis], PAK3d protein [Xenopus laevis], p21-activated kinase [Xenopus laevis], PAK1 protein [Xenopus laevis], NA	Q13153, O75914, Q13177	PAK1, PAK3, PAK2	NA, OPHN3	p21 protein (Cdc42 Rac)-activated kinase	0.16356287617412338	0.7351687540695494	FALSE	FALSE	FALSE
ENOG411CPZ7	0	0	0	2	0	1.385815745449537	0	1.4845900478712815	0	1	0.9799197110824579	ENOG411CPZ7	147906254, 148222359, Xelaev18020252m.g, Xelaev18018647m.g	GenBank, Xenbase_9.1	dbnl.S, dbnl.L	drebrin-like protein A [Xenopus laevis], drebrin-like protein B [Xenopus laevis], NA	Q9UJU6	DBNL	CMAP SH3P7	Drebrin-like	0.16356287617412338	0.7351687540695494	FALSE	FALSE	FALSE
ENOG411D3TZ	0	0	0	2	0	1.385815745449537	0	1.4845900478712815	0	1	0.9799197110824579	ENOG411D3TZ	Xelaev18012118m.g	Xenbase_9.1	cisd3.L	NA	P0C7P0	CISD3	NA	CDGSH iron sulfur domain 3	0.16356287617412338	0.7351687540695494	FALSE	FALSE	FALSE
ENOG411CWFB	0	0	0	2	0	1.385815745449537	0	1.4845900478712815	0	1	0.9799197110824579	ENOG411CWFB	148238289, 50415212, 62740173, Xelaev18014108m.g	GenBank, Xenbase_9.1	pold3.L	DNA-directed DNA polymerase delta 3 [Xenopus laevis], POLD3 protein [Xenopus laevis], NA	Q15054	POLD3	KIAA0039	polymerase (DNA-directed), delta 3, accessory subunit	0.16356287617412338	0.7351687540695494	FALSE	FALSE	FALSE
ENOG411CVAD	0	0	0	2	0	1.385815745449537	0	1.4845900478712815	0	1	0.9799197110824579	ENOG411CVAD	118723354, 147903871, Xelaev18029714m.g	GenBank, Xenbase_9.1	slc2a2.S	solute carrier family 2, facilitated glucose transporter member 2 [Xenopus laevis], solute carrier family 2 (facilitated glucose transporter), member 2 [Xenopus laevis], NA	P11168	SLC2A2	GLUT2	solute carrier family 2, facilitated glucose transporter member 2	0.16356287617412338	0.7351687540695494	FALSE	FALSE	FALSE
ENOG411CPX3	0	0	0	2	0	1.385815745449537	0	1.4845900478712815	0	1	0.9799197110824579	ENOG411CPX3	115292035, 55249601, 77748185, Xelaev18007759m.g, Xelaev18010590m.g	GenBank, Xenbase_9.1	bri3bp.L, bri3bp.S	Unknown (protein for IMAGE:8319076) [Xenopus laevis], LOC495697 protein [Xenopus laevis], Unknown (protein for IMAGE:4959239) [Xenopus laevis], NA	Q8WY22	BRI3BP	KG19	bri3 binding protein	0.16356287617412338	0.7351687540695494	FALSE	FALSE	FALSE
ENOG411CWH3	0	0	0	2	0	1.385815745449537	0	1.4845900478712815	0	1	0.9799197110824579	ENOG411CWH3	110287969, 147903310, 49119081, 58402642, 83405638, Xelaev18007309m.g	GenBank, Xenbase_9.1	supt16h.L	RecName: Full=FACT complex subunit SPT16; AltName: Full=DNA unwinding factor 140 kDa subunit; Short=DUF140; AltName: Full=Facilitates chromatin transcription complex subunit spt16, FACT complex subunit SPT16 [Xenopus laevis], Unknown (protein for IMAGE:5048405) [Xenopus laevis], LOC733160 protein [Xenopus laevis], Unknown (protein for MGC:132046) [Xenopus laevis], NA	Q9Y5B9	SUPT16H	FACT140 FACTP140	suppressor of Ty 16 homolog (S. cerevisiae)	0.16356287617412338	0.7351687540695494	FALSE	FALSE	FALSE
ENOG411CX8Y	0	0	0	2	0	1.385815745449537	0	1.4845900478712815	0	1	0.9799197110824579	ENOG411CX8Y	1079309, 147899288, 148225464, 148233878, 148236543, 168988721, 193506593, 21898550, 27735437, 394757, 73536251, 9988777, Xelaev18046205m.g, Xelaev18000887m.g	GenBank, Xenbase_9.1	aurka.S, aurkb.S	protein kinase (EC 2.7.1.-) p46XlEg22 - African clawed frog, aurora kinase B-A [Xenopus laevis], aurora kinase B-B [Xenopus laevis], aurora kinase A-B [Xenopus laevis], aurora kinase A-A [Xenopus laevis], Chain A, Crystal Structure Of Aurora B Kinase In Complex With A Aminothiazole Inhibitor, Chain A, Structure Of Aurora B Kinase In Complex With Zm447439, aurora B [Xenopus laevis], LOC398457 prot…	O14965, Q96GD4, Q9UQB9	AURKA, AURKB, AURKC	AIK AIRK1 ARK1 AURA AYK1 BTAK IAK1 STK15 STK6, AIK2 AIM1 AIRK2 ARK2 STK1 STK12 STK5, AIE2 AIK3 AIRK3 ARK3 STK13	Aurora kinase	0.16356287617412338	0.7351687540695494	FALSE	FALSE	FALSE
ENOG411CRDC	0	0	0	2	0	1.385815745449537	0	1.4845900478712815	0	1	0.9799197110824579	ENOG411CRDC	Xelaev18039619m.g	Xenbase_9.1	l2hgdh.L	NA	Q9H9P8	L2HGDH	C14orf160	L-2-hydroxyglutarate dehydrogenase	0.16356287617412338	0.7351687540695494	FALSE	FALSE	FALSE
ENOG411CWPQ	0	0	0	2	0	1.385815745449537	0	1.4845900478712815	0	1	0.9799197110824579	ENOG411CWPQ	148228235, Xelaev18023991m.g	GenBank, Xenbase_9.1	sec61a1.L	Sec61 alpha 1 subunit [Xenopus laevis], NA	P61619, Q9H9S3	SEC61A1, SEC61A2	SEC61A, NA	Sec61 alpha 1 subunit (S. cerevisiae)	0.16356287617412338	0.7351687540695494	FALSE	FALSE	FALSE
ENOG411CUG4	0	0	0	2	0	1.385815745449537	0	1.4845900478712815	0	1	0.9799197110824579	ENOG411CUG4	148226811, Xelaev18042971m.g, Xelaev18002620m.g	GenBank, Xenbase_9.1	mrpl9.S, mrpl9	uncharacterized protein LOC495474 [Xenopus laevis], NA	Q9BYD2	MRPL9	NA	Mitochondrial ribosomal protein L9	0.16356287617412338	0.7351687540695494	FALSE	FALSE	FALSE
ENOG411CVG5	0	0	0	2	0	1.385815745449537	0	1.4845900478712815	0	1	0.9799197110824579	ENOG411CVG5	148230597, Xelaev18002195m.g, Xelaev18003380m.g, Xelaev18007855m.g, Xelaev18010661m.g	GenBank, Xenbase_9.1	atxn2l.S, atxn2l.L, atxn2.L, atxn2.S	ataxin 2 [Xenopus laevis], NA	Q99700, Q8WWM7	ATXN2, ATXN2L	ATX2 SCA2 TNRC13, A2D A2LG A2LP A2RP	Ataxin 2-like	0.16356287617412338	0.7351687540695494	FALSE	FALSE	FALSE
ENOG411CW05	0	0	0	2	0	1.385815745449537	0	1.4845900478712815	0	1	0.9799197110824579	ENOG411CW05	115528674, 158564272, 47125206, 66911532, 80477530, Xelaev18003589m.g	GenBank, Xenbase_9.1	ctu2.L	Unknown (protein for MGC:154644) [Xenopus laevis], RecName: Full=Cytoplasmic tRNA 2-thiolation protein 2 B, LOC431806 protein [Xenopus laevis], Unknown (protein for IMAGE:6633620) [Xenopus laevis], NA	Q2VPK5	CTU2	C16orf84 NCS2	cytosolic thiouridylase subunit 2 homolog (S. pombe)	0.16356287617412338	0.7351687540695494	FALSE	FALSE	FALSE
ENOG411CPDJ	0	0	0	2	0	1.385815745449537	0	1.4845900478712815	0	1	0.9799197110824579	ENOG411CPDJ	Xelaev18004870m.g, Xelaev18034732m.g	Xenbase_9.1	dysf-like.L, myof.L	NA	O75923	DYSF	FER1L1	Dysferlin, limb girdle muscular dystrophy 2B (Autosomal recessive)	0.16356287617412338	0.7351687540695494	FALSE	FALSE	FALSE
ENOG411D0T2	0	0	0	2	0	1.385815745449537	0	1.4845900478712815	0	1	0.9799197110824579	ENOG411D0T2	128801, 304556748, Xelaev18003734m.g	GenBank, Xenbase_9.1	Xelaev18003734m.g	RecName: Full=NADH-ubiquinone oxidoreductase chain 5; AltName: Full=NADH dehydrogenase subunit 5, NADH dehydrogenase subunit 5 [Xenopus laevis], NA	P03915	MT-ND5	MTND5 NADH5 ND5	Core subunit of the mitochondrial membrane respiratory chain NADH dehydrogenase (Complex I) that is believed to belong to the minimal assembly required for catalysis. Complex I functions in the transfer of electrons from NADH to the respiratory chain. The immediate electron acceptor for the enzyme is believed to be ubiquinone (By similarity)	0.16356287617412338	0.7351687540695494	FALSE	FALSE	FALSE
ENOG411CXXZ	0	0	0	2	0	1.385815745449537	0	1.4845900478712815	0	1	0.9799197110824579	ENOG411CXXZ	148233628, 162287235, Xelaev18005468m.g, Xelaev18009212m.g	GenBank, Xenbase_9.1	plrg1.L, plrg1.S	pleiotropic regulator 1 [Xenopus laevis], uncharacterized protein LOC495006 [Xenopus laevis], NA	O43660	PLRG1	NA	Pleiotropic regulator 1	0.16356287617412338	0.7351687540695494	FALSE	FALSE	FALSE
ENOG411CPMX	0	0	0	2	0	1.385815745449537	0	1.4845900478712815	0	1	0.9799197110824579	ENOG411CPMX	12229929, 12229930	GenBank	NA	RecName: Full=Proteasome subunit alpha type-7-B; AltName: Full=Proteasome subunit alpha 4-B, RecName: Full=Proteasome subunit alpha type-7-A; AltName: Full=Proteasome subunit alpha 4-A	O14818, Q8TAA3	PSMA7, PSMA8	HSPC, PSMA7L	The proteasome is a multicatalytic proteinase complex which is characterized by its ability to cleave peptides with Arg, Phe, Tyr, Leu, and Glu adjacent to the leaving group at neutral or slightly basic pH. The proteasome has an ATP-dependent proteolytic activity (By similarity)	0.16356287617412338	0.7351687540695494	FALSE	FALSE	FALSE
Xelaev18019675m.g	0	0	0	2	0	1.385815745449537	0	1.4845900478712815	0	1	0.9799197110824579	Xelaev18019675m.g	NA	Xenbase_9.1	Xelaev18019675m.g	NA	NA	NA	NA	NA	0.16356287617412338	0.7351687540695494	FALSE	FALSE	FALSE
ENOG411CRDD	0	0	0	2	0	1.385815745449537	0	1.4845900478712815	0	1	0.9799197110824579	ENOG411CRDD	147900121, 49116857, 49522920, 83405077, Xelaev18018090m.g, Xelaev18020737m.g, Xelaev18008187m.g, Xelaev18010913m.g	GenBank, Xenbase_9.1	ap3b2.L, ap3b2.S, ap3b1.L, ap3b1.S	adaptor-related protein complex 3, beta 1 subunit [Xenopus laevis], LOC443663 protein [Xenopus laevis], LOC443724 protein [Xenopus laevis], NA	Q13367, O00203	AP3B2, AP3B1	NA, ADTB3A	Adaptor-related protein complex 3 beta	0.16356287617412338	0.7351687540695494	FALSE	FALSE	FALSE
ENOG411CVYS	0	0	0	2	0	1.385815745449537	0	1.4845900478712815	0	1	0.9799197110824579	ENOG411CVYS	148230653	GenBank	NA	leucine-rich repeat-containing protein 40 [Xenopus laevis]	Q9H9A6	LRRC40	NA	Leucine rich repeat containing 40	0.16356287617412338	0.7351687540695494	FALSE	FALSE	FALSE
ENOG411CZ9T	0	0	0	2	0	1.385815745449537	0	1.4845900478712815	0	1	0.9799197110824579	ENOG411CZ9T	Xelaev18011284m.g, Xelaev18014432m.g	Xenbase_9.1	fam162a.L, fam162a.S	NA	Q96A26	FAM162A	C3orf28 E2IG5	Family with sequence similarity 162, member	0.16356287617412338	0.7351687540695494	FALSE	FALSE	FALSE
ENOG411CYC7	0	0	0	2	0	1.385815745449537	0	1.4845900478712815	0	1	0.9799197110824579	ENOG411CYC7	147900660, 148227686, 28278775	GenBank	NA	nicotinamide phosphoribosyltransferase [Xenopus laevis], uncharacterized protein LOC735059 [Xenopus laevis], LOC398502 protein [Xenopus laevis]	P43490	NAMPT	PBEF PBEF1	Nicotinamide phosphoribosyltransferase	0.16356287617412338	0.7351687540695494	FALSE	FALSE	FALSE
ENOG411CWYQ	0	0	0	2	0	1.385815745449537	0	1.4845900478712815	0	1	0.9799197110824579	ENOG411CWYQ	Xelaev18000222m.g, Xelaev18037050m.g	Xenbase_9.1	Xelaev18000222m.g, cox15.S	NA	Q7KZN9	COX15	NA	cytochrome c oxidase assembly homolog 15 (yeast)	0.16356287617412338	0.7351687540695494	FALSE	FALSE	FALSE
ENOG411DDPI	0	0	0	2	0	1.385815745449537	0	1.4845900478712815	0	1	0.9799197110824579	ENOG411DDPI	29127003, Xelaev18012998m.g	GenBank, Xenbase_9.1	tsga10.L	LOC398577 protein [Xenopus laevis], NA	Q9BZW7	TSGA10	CEP4L	testis specific 10	0.16356287617412338	0.7351687540695494	FALSE	FALSE	FALSE
ENOG411CPMV	0	0	0	2	0	1.385815745449537	0	1.4845900478712815	0	1	0.9799197110824579	ENOG411CPMV	161611758, Xelaev18029655m.g, Xelaev18027517m.g, Xelaev18029657m.g, Xelaev18027518m.g	GenBank, Xenbase_9.1	bdh1.S, bdh1.L, loc100497276-like.S, loc100497276-like.L	LOC100127326 protein [Xenopus laevis], NA	Q02338	BDH1	BDH SDR9C1	3-hydroxybutyrate dehydrogenase, type 1	0.16356287617412338	0.7351687540695494	FALSE	FALSE	FALSE
ENOG411CXFQ	0	0	0	2	0	1.385815745449537	0	1.4845900478712815	0	1	0.9799197110824579	ENOG411CXFQ	148234795, 22090473, 49115431, 80476249	GenBank	NA	nuclear casein kinase and cyclin-dependent kinase substrate 1 [Xenopus laevis], JC7 [Xenopus laevis], LOC443644 protein [Xenopus laevis], Unknown (protein for MGC:130731) [Xenopus laevis]	Q9H1E3	NUCKS1	NUCKS	nuclear casein kinase and cyclin-dependent kinase substrate 1	0.16356287617412338	0.7351687540695494	FALSE	FALSE	FALSE
ENOG411DGFM	0	0	0	2	0	1.385815745449537	0	1.4845900478712815	0	1	0.9799197110824579	ENOG411DGFM	148234561, 285026463, 52138970, 6172234, 6172236, 63146277, Xelaev18046188m.g, Xelaev18043463m.g	GenBank, Xenbase_9.1	sall4.S, sall4.L	sal-like 4 [Xenopus laevis], zinc finger transcription factor SALL4 b [Xenopus laevis], SALL4 protein [Xenopus laevis], Xsal-3 short form [Xenopus laevis], Xsal-3' long form [Xenopus laevis], Unknown (protein for MGC:115268) [Xenopus laevis], NA	NA	NA	NA	sal-like 4 (Drosophila)	0.16356287617412338	0.7351687540695494	FALSE	FALSE	FALSE
ENOG411D4VN	0	0	0	2	0	1.385815745449537	0	1.4845900478712815	0	1	0.9799197110824579	ENOG411D4VN	114107958, Xelaev18018535m.g	GenBank, Xenbase_9.1	snrpg.L	MGC154809 protein [Xenopus laevis], NA	P62308, A8MWD9	SNRPG, SNRPGP15	PBSCG, NA	small nuclear ribonucleoprotein polypeptide G	0.16356287617412338	0.7351687540695494	FALSE	FALSE	FALSE
ENOG411CQEU	0	0	0	2	0	1.385815745449537	0	1.4845900478712815	0	1	0.9799197110824579	ENOG411CQEU	116487994, 120537880, Xelaev18030302m.g, Xelaev18028412m.g	GenBank, Xenbase_9.1	tmem214.S, tmem214.L	MGC154890 protein [Xenopus laevis], LOC100036861 protein [Xenopus laevis], NA	Q6NUQ4	TMEM214	NA	Transmembrane protein 214	0.16356287617412338	0.7351687540695494	FALSE	FALSE	FALSE
ENOG411CXJ6	0	0	0	2	0	1.385815745449537	0	1.4845900478712815	0	1	0.9799197110824579	ENOG411CXJ6	148233350, Xelaev18039071m.g, Xelaev18042370m.g	GenBank, Xenbase_9.1	ppp1r13l.L, ppp1r13l.S	protein phosphatase 1, regulatory subunit 13 like [Xenopus laevis], NA	Q8WUF5	PPP1R13L	IASPP NKIP1 PPP1R13BL RAI	protein phosphatase 1, regulatory subunit 13 like	0.16356287617412338	0.7351687540695494	FALSE	FALSE	FALSE
ENOG411D3FM	0	0	0	2	0	1.385815745449537	0	1.4845900478712815	0	1	0.9799197110824579	ENOG411D3FM	Xelaev18046986m.g, Xelaev18044431m.g	Xenbase_9.1	loc100488277.S, loc100488277.L	NA	NA	NA	NA	NA	0.16356287617412338	0.7351687540695494	FALSE	FALSE	FALSE
ENOG411CP71	0	0	0	2	0	1.385815745449537	0	1.4845900478712815	0	1	0.9799197110824579	ENOG411CP71	148232184, Xelaev18009335m.g	GenBank, Xenbase_9.1	ccdc109b.S	coiled-coil domain containing 109B [Xenopus laevis], NA	Q9NWR8	MCUB	CCDC109B	Coiled-coil domain containing 109B	0.16356287617412338	0.7351687540695494	FALSE	FALSE	FALSE
ENOG411D0MK	0	0	0	2	0	1.385815745449537	0	1.4845900478712815	0	1	0.9799197110824579	ENOG411D0MK	117667938, 117667940, 147904786, Xelaev18000741m.g, Xelaev18004428m.g	GenBank, Xenbase_9.1	carm1.S, carm1.L	coactivator-associated arginine methyltransferase 1-a [Xenopus laevis], coactivator-associated arginine methyltransferase 1-b [Xenopus laevis], histone-arginine methyltransferase CARM1 [Xenopus laevis], NA	Q86X55	CARM1	PRMT4	Coactivator-associated arginine methyltransferase 1	0.16356287617412338	0.7351687540695494	FALSE	FALSE	FALSE
ENOG411CUER	0	0	0	2	0	1.385815745449537	0	1.4845900478712815	0	1	0.9799197110824579	ENOG411CUER	Xelaev18037428m.g, Xelaev18035361m.g	Xenbase_9.1	loc101734338.S, loc101734338.L	NA	Q6NUN7	JHY	C11orf63	Chromosome 11 open reading frame 63	0.16356287617412338	0.7351687540695494	FALSE	FALSE	FALSE
ENOG411CVGW	0	0	0	2	0	1.385815745449537	0	1.4845900478712815	0	1	0.9799197110824579	ENOG411CVGW	147902688, Xelaev18020849m.g, Xelaev18017940m.g	GenBank, Xenbase_9.1	lmf2.S, lmf2.L	lipase maturation factor 2 [Xenopus laevis], NA	Q9BU23	LMF2	TMEM112B TMEM153	Lipase maturation factor 2	0.16356287617412338	0.7351687540695494	FALSE	FALSE	FALSE
ENOG411CX81	0	0	0	2	0	1.385815745449537	0	1.4845900478712815	0	1	0.9799197110824579	ENOG411CX81	147902158, 148222603, 28277248, Xelaev18013442m.g, Xelaev18015937m.g	GenBank, Xenbase_9.1	dctn2.L, dctn2.S	dynactin subunit 2-B [Xenopus laevis], dynactin subunit 2-A [Xenopus laevis], Dctn2-prov protein [Xenopus laevis], NA	Q13561	DCTN2	DCTN50	Dynactin 2 (P50)	0.16356287617412338	0.7351687540695494	FALSE	FALSE	FALSE
ENOG411CYB1	0	0	0	2	0	1.385815745449537	0	1.4845900478712815	0	1	0.9799197110824579	ENOG411CYB1	134026, 929913, Xelaev18028014m.g, Xelaev18030053m.g	GenBank, Xenbase_9.1	rps7.L, rnaseh1.S	RecName: Full=40S ribosomal protein S7; AltName: Full=40S ribosomal protein S8, ribosomal protein S8 [Xenopus laevis], NA	P62081	RPS7	NA	ribosomal protein S7	0.16356287617412338	0.7351687540695494	FALSE	FALSE	FALSE
ENOG411D472	0	0	0	2	0	1.385815745449537	0	1.4845900478712815	0	1	0.9799197110824579	ENOG411D472	148235923, 284520946, 32450246, Xelaev18026871m.g	GenBank, Xenbase_9.1	mpc1.L	brain protein 44-like [Xenopus laevis], MGC64469 protein [Xenopus laevis], NA	Q9Y5U8	MPC1	BRP44L	mitochondrial pyruvate carrier 1	0.16356287617412338	0.7351687540695494	FALSE	FALSE	FALSE
ENOG411CVUA	0	2	2	2	1.4606300031204151	-0.08517877068950216	1.715023041285529	-0.10037245284987478	1	2	0.9725908936432927	ENOG411CVUA	297307105, 4929470, Xelaev18026645m.g, Xelaev18028916m.g, Xelaev18042570m.g	GenBank, Xenbase_9.1	hnrnpll.L, hnrnpll.S, hnrnpl.S	heterogeneous nuclear ribonucleoprotein L [Xenopus laevis], RNA-binding protein XlhnRNPL [Xenopus laevis], NA	P14866, Q8WVV9	HNRNPL, HNRNPLL	HNRPL, HNRPLL SRRF	heterogeneous nuclear ribonucleoprotein	0.1653783351687248	0.7351687540695494	FALSE	FALSE	FALSE
ENOG411CUPZ	0	2	2	2	1.4606300031204151	-0.08517877068950216	1.715023041285529	-0.10037245284987478	1	2	0.9725908936432927	ENOG411CUPZ	148224016, Xelaev18008065m.g	GenBank, Xenbase_9.1	ttc37.L	tetratricopeptide repeat protein 37 [Xenopus laevis], NA	Q6PGP7	TTC37	KIAA0372	Tetratricopeptide repeat domain 37	0.1653783351687248	0.7351687540695494	FALSE	FALSE	FALSE
ENOG411D3QF	0	2	2	2	1.4606300031204151	-0.08517877068950216	1.715023041285529	-0.10037245284987478	1	2	0.9725908936432927	ENOG411D3QF	133883, 148234332, 148921641	GenBank	NA	RecName: Full=40S ribosomal protein S20; AltName: Full=S22, MGC82136 protein [Xenopus laevis], LOC100101334 protein [Xenopus laevis]	P60866	RPS20	NA	ribosomal protein S20	0.1653783351687248	0.7351687540695494	FALSE	FALSE	FALSE
ENOG411CQ49	0	3	2	3	1.4606300031204151	-0.10433447470007592	1.715023041285529	-0.10037245284987478	1.5	2.5	0.9590457654390137	ENOG411CQ49	123904498	GenBank	NA	RecName: Full=Transcription factor BTF3 homolog 4; AltName: Full=Basic transcription factor 3-like 4	Q96K17	BTF3L4	NA	Basic transcription factor 3-like 4	0.16876784517764057	0.7351687540695494	FALSE	FALSE	FALSE
ENOG411CQC3	0	4	2	4	1.4606300031204151	-0.12048918043337997	1.715023041285529	-0.1003724528498746	2	3	0.9476226634669211	ENOG411CQC3	121119, 148223299, 148236707, Xelaev18030912m.g, Xelaev18030911m.g, Xelaev18033006m.g, Xelaev18038364m.g	GenBank, Xenbase_9.1	loc100495760.L, scin.L, loc100495760.S, gsn.L	RecName: Full=Gelsolin; AltName: Full=Actin-depolymerizing factor; Short=ADF; AltName: Full=Brevin, gelsolin [Xenopus laevis], scinderin [Xenopus laevis], NA	P06396, Q9Y6U3	GSN, SCIN	NA, KIAA1905	Gelsolin	0.1716607921684854	0.7351687540695494	FALSE	FALSE	FALSE
ENOG411CTTX	0	2	0	6	0	1.3260578902752334	0	1.122019968486573	1	3	0.9376645264595442	ENOG411CTTX	116487829, 148234261, 159155359, Xelaev18013238m.g, Xelaev18005568m.g	GenBank, Xenbase_9.1	naa16-like.L, naa15.L	Narg1l protein [Xenopus laevis], putative N-terminal acetyltransferase [Xenopus laevis], NA	Q9BXJ9, Q6N069	NAA15, NAA16	GA19 NARG1 NATH TBDN100, NARG1L NAT2	NatA auxiliary subunit	0.17420841968264955	0.7351687540695494	FALSE	FALSE	FALSE
ENOG411CZQV	4	4	6	6	0.8062154412176157	0.5122645051968542	0.6154873677346148	0.3850543743203671	4	6	0.9323061109681474	ENOG411CZQV	147904776, 44968314, Xelaev18014861m.g	GenBank, Xenbase_9.1	rpl10a.S	60S ribosomal protein L10a [Xenopus laevis], ribosomal protein L10a [Xenopus laevis], NA	P62906	RPL10A	NEDD6	ribosomal protein L10A	0.17558917524361484	0.7351687540695494	FALSE	FALSE	FALSE
ENOG411CRB4	0	6	2	6	1.4606300031204151	-0.14760307730803043	1.715023041285529	-0.1003724528498746	3	4	0.928450243122463	ENOG411CRB4	148235809, Xelaev18015405m.g, Xelaev18012819m.g	GenBank, Xenbase_9.1	rpl24.S, rpl24.L	ribosomal protein L24 [Xenopus laevis], NA	P83731	RPL24	NA	ribosomal protein L24	0.17658703325211314	0.7351687540695494	FALSE	FALSE	FALSE
ENOG411CSRW	2	7	4	9	0.9419135838451803	0.3411940357102202	0.8670261347305791	0.22155564203748762	4.5	6.5	0.9072940987797524	ENOG411CSRW	147900857, 51703506, Xelaev18014005m.g, Xelaev18016554m.g, Xelaev18014009m.g, Xelaev18014004m.g, Xelaev18014011m.g, Xelaev18014013m.g	GenBank, Xenbase_9.1	Xelaev18014005m.g, Xelaev18016554m.g, Xelaev18014009m.g, Xelaev18014004m.g, Xelaev18014011m.g, aloxe3.L	arachidonate 12-lipoxygenase, 12R type [Xenopus laevis], LOC446930 protein [Xenopus laevis], NA	Q9BYJ1, O15296, O75342	ALOXE3, ALOX15B, ALOX12B	NA	arachidonate	0.1821256470033986	0.7351687540695494	FALSE	FALSE	FALSE
ENOG411D3NI	0	1	0	4	0	1.2768357360513916	0	1.2215556420374876	0.5	2	0.9028592074232556	ENOG411D3NI	119368651, 147901887, 147907206, 46329629, Xelaev18030970m.g, Xelaev18047189m.g	GenBank, Xenbase_9.1	cycs.L, Xelaev18047189m.g	RecName: Full=Cytochrome c, somatic B, cytochrome c, somatic A [Xenopus laevis], cytochrome c, testis-specific [Xenopus laevis], Cycs-b protein [Xenopus laevis], NA	P99999	CYCS	CYC	Electron carrier protein. The oxidized form of the cytochrome c heme group can accept an electron from the heme group of the cytochrome c1 subunit of cytochrome reductase. Cytochrome c then transfers this electron to the cytochrome oxidase complex, the final protein carrier in the mitochondrial electron-transport chain	0.1833003114896683	0.7351687540695494	FALSE	FALSE	FALSE
ENOG411DEXH	0	1	0	4	0	1.2768357360513916	0	1.2215556420374876	0.5	2	0.9028592074232556	ENOG411DEXH	147902226, 148224502, Xelaev18001535m.g, Xelaev18004559m.g	GenBank, Xenbase_9.1	fus.L, fus.S	fused in sarcoma [Xenopus laevis], MGC84691 protein [Xenopus laevis], NA	NA	NA	NA	fused in sarcoma	0.1833003114896683	0.7351687540695494	FALSE	FALSE	FALSE
ENOG411CY7P	0	1	0	4	0	1.2768357360513916	0	1.2215556420374876	0.5	2	0.9028592074232556	ENOG411CY7P	148230798, Xelaev18040643m.g, Xelaev18042803m.g	GenBank, Xenbase_9.1	copa.L, copa.S	coatomer protein complex, subunit alpha [Xenopus laevis], NA	P53621	COPA	NA	Coatomer protein complex subunit alpha	0.1833003114896683	0.7351687540695494	FALSE	FALSE	FALSE
ENOG411CQMT	0	1	0	4	0	1.2768357360513916	0	1.2215556420374876	0.5	2	0.9028592074232556	ENOG411CQMT	126632061, 148235683, Xelaev18013384m.g	GenBank, Xenbase_9.1	sarnp.L	LOC100049111 protein [Xenopus laevis], uncharacterized protein LOC495376 [Xenopus laevis], NA	P82979	SARNP	HCC1	SAP domain containing ribonucleoprotein	0.1833003114896683	0.7351687540695494	FALSE	FALSE	FALSE
ENOG411CRH0	0	1	0	4	0	1.2768357360513916	0	1.2215556420374876	0.5	2	0.9028592074232556	ENOG411CRH0	34785887, Xelaev18026157m.g, Xelaev18028741m.g	GenBank, Xenbase_9.1	lrpprc.L, lrpprc.S	LOC398720 protein [Xenopus laevis], NA	P42704	LRPPRC	LRP130	leucine-rich pentatricopeptide repeat containing	0.1833003114896683	0.7351687540695494	FALSE	FALSE	FALSE
ENOG411CRMU	0	1	0	4	0	1.2768357360513916	0	1.2215556420374876	0.5	2	0.9028592074232556	ENOG411CRMU	147899531, 148230136, 148234090, Xelaev18019100m.g	GenBank, Xenbase_9.1	surf4.1.L	MGC82578 protein [Xenopus laevis], surfeit 4, gene 1 [Xenopus laevis], surfeit 4, gene 1, gene 2 [Xenopus laevis], NA	O15260	SURF4	SURF-4	Surfeit 4	0.1833003114896683	0.7351687540695494	FALSE	FALSE	FALSE
ENOG411CRJ6	0	1	0	4	0	1.2768357360513916	0	1.2215556420374876	0.5	2	0.9028592074232556	ENOG411CRJ6	10834850, 147906306, 27694581, 290463409, 290463410, 29126828, 301171314, 49257953, 514259, 514260, Xelaev18019025m.g	GenBank, Xenbase_9.1	ilf3.L	CCAAT box transcription factor p122 subunit [Xenopus laevis], interleukin enhancer-binding factor 3-A [Xenopus laevis], CBTF122 protein [Xenopus laevis], RecName: Full=Interleukin enhancer-binding factor 3-A; AltName: Full=CCAAT box transcription factor subunit; AltName: Full=Double-stranded RNA-binding protein 4F.1; Short=DsRNA-binding protein 4F.1, RecName: Full=Interleukin enhancer-binding fac…	Q12906	ILF3	DRBF MPHOSPH4 NF90	Interleukin enhancer binding factor 3, 90kDa	0.1833003114896683	0.7351687540695494	FALSE	FALSE	FALSE
ENOG411D32C	1	3	2	5	0.6653122764971168	0.6027843549209267	0.715023041285529	0.48459004787128135	2	3.5	0.8966797272755165	ENOG411D32C	147903565, 148226805, 57032511, Xelaev18020299m.g, Xelaev18018596m.g	GenBank, Xenbase_9.1	h2afv.S, h2afv.L	MGC85536 protein [Xenopus laevis], variant histone H2A.Zl1 [Xenopus laevis], LOC397949 protein [Xenopus laevis], NA	Q71UI9, P0C0S5	H2AFV, H2AFZ	H2AV, H2AZ	H2A histone family, member	0.18494492065427579	0.7351687540695494	FALSE	FALSE	FALSE
ENOG411CWSX	11	45	13	54	0.6946416436471813	0.5040490516860501	0.35245296190082104	0.15742530461777193	28	33.5	0.8476023192153458	ENOG411CWSX	1150850, 120577592, 147900510, 148232054, 54873684, Xelaev18039699m.g, Xelaev18026411m.g	GenBank, Xenbase_9.1	hsp90aa1.1.L, hsp90ab1.L	heat shock protein 90 [Xenopus laevis], LOC100037031 protein [Xenopus laevis], heat shock protein 90kDa alpha (cytosolic), class A member 1, gene 1 [Xenopus laevis], heat shock protein 90kDa alpha (cytosolic), class B member 1 [Xenopus laevis], Hsp90alpha [Xenopus laevis], NA	Q58FF6, Q14568, Q58FG0, P07900, P08238	HSP90AB4P, HSP90AA2P, HSP90AA5P, HSP90AA1, HSP90AB1	NA, HSP90AA2 HSPCAL3, HSP90AE, HSP90A HSPC1 HSPCA, HSP90B HSPC2 HSPCB	Heat shock protein 90kDa alpha (Cytosolic), class	0.1983297411570689	0.7351687540695494	FALSE	FALSE	FALSE
ENOG411CZFK	1	13	2	17	0.6653122764971168	0.5143303142030803	0.715023041285529	0.2621976265348337	7	9.5	0.8341332752605762	ENOG411CZFK	Xelaev18041192m.g, Xelaev18039698m.g	Xenbase_9.1	dync1h1.S, dync1h1.L	NA	Q14204	DYNC1H1	DHC1 DNCH1 DNCL DNECL DYHC KIAA0325	dynein, cytoplasmic 1, heavy chain 1	0.20210294300764065	0.7351687540695494	FALSE	FALSE	FALSE
ENOG411CU4Y	1	4	2	6	0.6653122764971168	0.5122645051968542	0.715023041285529	0.3850543743203671	2.5	4	0.8326725277036375	ENOG411CU4Y	117558241, 147906554, 148228801, 28436774, Xelaev18046942m.g	GenBank, Xenbase_9.1	loc100036800.S	LOC100036800 protein [Xenopus laevis], CD63 molecule [Xenopus laevis], similar to CD63 antigen [Xenopus laevis], LOC398555 protein [Xenopus laevis], NA	P08962	CD63	MLA1 TSPAN30	Cd63 molecule	0.20251472120584108	0.7351687540695494	FALSE	FALSE	FALSE
ENOG411CQ1J	1	4	2	6	0.6653122764971168	0.5122645051968542	0.715023041285529	0.3850543743203671	2.5	4	0.8326725277036375	ENOG411CQ1J	148225092, 148236889, 47123022, Xelaev18005305m.g, Xelaev18005304m.g	GenBank, Xenbase_9.1	paics.1.L, paics.2.L	phosphoribosylaminoimidazole carboxylase, phosphoribosylaminoribosylaminoimidazole succinocarboxamide synthetase [Xenopus laevis], phosphoribosylaminoimidazole carboxylase, phosphoribosylaminoimidazole succinocarboxamide synthetase, gene 1 [Xenopus laevis], LOC431975 protein [Xenopus laevis], NA	P22234	PAICS	ADE2 AIRC PAIS	phosphoribosylaminoimidazole carboxylase, phosphoribosylaminoimidazole succinocarboxamide synthetase	0.20251472120584108	0.7351687540695494	FALSE	FALSE	FALSE
ENOG411CTFH	0	3	0	7	0	1.1592557862876798	0	0.8996275471501252	1.5	3.5	0.8197176276137614	ENOG411CTFH	147898905, 147905173, Xelaev18013438m.g, Xelaev18013439m.g, Xelaev18015931m.g	GenBank, Xenbase_9.1	mars.L, Xetrov90006328m.L, Xetrov90006328m.S	methionyl-tRNA synthetase [Xenopus laevis], methionyl-tRNA synthetase, cytoplasmic [Xenopus laevis], NA	P56192	MARS	NA	methionyl-tRNA synthetase	0.20618854930029953	0.7351687540695494	FALSE	FALSE	FALSE
ENOG411CZRR	0	5	0	10	0	1.155998030195133	0	0.7740966650662663	2.5	5	0.8174140461892697	ENOG411CZRR	115528814, 119226358, 148228657, 169642544, Xelaev18043844m.g	GenBank, Xenbase_9.1	vat1.L	LOC100036826 protein [Xenopus laevis], vesicle amine transport protein 1 homolog [Xenopus laevis], NA	Q99536	VAT1	NA	vesicle amine transport protein 1 homolog (T. californica)	0.2068459256670986	0.7351687540695494	FALSE	FALSE	FALSE
ENOG411CYMK	3	6	4	9	0.5263863184554676	0.6275771124353471	0.45198863545173534	0.4142007199798836	4.5	6.5	0.8159753672241888	ENOG411CYMK	122936422, 125858794, 147901093, 160773913, 44969357, Xelaev18038372m.g, Xelaev18041589m.g	GenBank, Xenbase_9.1	rpl7a.L, rpl7a.S	LOC100037086 protein [Xenopus laevis], Unknown (protein for MGC:160337) [Xenopus laevis], ribosomal protein L7a [Xenopus laevis], NA	P62424	RPL7A	SURF-3 SURF3	Ribosomal protein L7A	0.2072571121750699	0.7351687540695494	FALSE	FALSE	FALSE
ENOG411CPQI	1	2	1	5	0.08422900289364679	1.047049290951141	0.1300605405643729	0.8996275471501252	1.5	3	0.7999345529867972	ENOG411CPQI	116063359, 148224798, 148231009	GenBank	NA	Xoom protein [Xenopus laevis], proteasomal ubiquitin receptor ADRM1-A [Xenopus laevis], proteasomal ubiquitin receptor ADRM1-B [Xenopus laevis]	Q16186	ADRM1	GP110	adhesion regulating molecule 1	0.21187435852660583	0.7351687540695494	FALSE	FALSE	FALSE
ENOG411CXKZ	1	2	1	5	0.08422900289364679	1.047049290951141	0.1300605405643729	0.8996275471501252	1.5	3	0.7999345529867972	ENOG411CXKZ	148234030, Xelaev18041326m.g, Xelaev18039531m.g	GenBank, Xenbase_9.1	psmc1.S, psmc1.L	proteasome (prosome, macropain) 26S subunit, ATPase, 1 [Xenopus laevis], NA	P62191	PSMC1	NA	Proteasome (Prosome, macropain) 26S subunit, ATPase, 1	0.21187435852660583	0.7351687540695494	FALSE	FALSE	FALSE
ENOG411CQ0F	1	10	3	11	1.0931687168209874	0.0280136050010526	1.1300605405643729	0.02515842923398444	5.5	7	0.7927956227068426	ENOG411CQ0F	148231869, Xelaev18010984m.g, Xelaev18020610m.g	GenBank, Xenbase_9.1	nnt.S, Xetrov90008802m.S	nicotinamide nucleotide transhydrogenase [Xenopus laevis], NA	Q13423	NNT	NA	Nicotinamide nucleotide transhydrogenase	0.21394845361758377	0.7351687540695494	FALSE	FALSE	FALSE
ENOG411CUUE	2	2	1	7	-0.45891978196333955	1.5770663336542057	-0.45490196015678314	1.3146650464289689	2	4	0.7906490090609659	ENOG411CUUE	117949829, 147899358, Xelaev18038505m.g	GenBank, Xenbase_9.1	rps4x.L	RecName: Full=40S ribosomal protein S4, 40S ribosomal protein S4 [Xenopus laevis], NA	P62701	RPS4X	CCG2 RPS4 SCAR	ribosomal protein	0.2145744196531921	0.7351687540695494	FALSE	FALSE	FALSE
ENOG411CRHZ	2	12	3	16	0.5690497043132894	0.5484398949263838	0.5450980398432168	0.28665067025937246	7	9.5	0.7901844735278102	ENOG411CRHZ	148234221, 212286078, 46249663, Xelaev18029543m.g, Xelaev18027426m.g	GenBank, Xenbase_9.1	psmd2.S, psmd2.L	proteasome (prosome, macropain) 26S subunit, non-ATPase, 2 [Xenopus laevis], MGC83233 protein [Xenopus laevis], NA	Q13200	PSMD2	TRAP2	proteasome (prosome, macropain) 26S subunit, non-ATPase, 2	0.21471002112153495	0.7351687540695494	FALSE	FALSE	FALSE
ENOG411CUU4	2	11	2	17	0.11920377284128798	0.9354993584196737	0.1300605405643729	0.48459004787128135	6.5	9.5	0.7457877362533112	ENOG411CUU4	147900889, Xelaev18021444m.g	GenBank, Xenbase_9.1	lars.S	leucyl-tRNA synthetase [Xenopus laevis], NA	Q9P2J5	LARS	KIAA1352	leucyl-trna synthetase	0.2278978246910496	0.7351687540695494	FALSE	FALSE	FALSE
ENOG411CRY3	0	2	0	5	0	1.047049290951141	0	0.8996275471501252	1	2.5	0.7403756538681182	ENOG411CRY3	160420251, Xelaev18027821m.g	GenBank, Xenbase_9.1	hdlbp.L	high density lipoprotein binding protein (vigilin) [Xenopus laevis], NA	Q00341	HDLBP	HBP VGL	High density lipoprotein binding protein	0.22953604364883531	0.7351687540695494	FALSE	FALSE	FALSE
ENOG411CP8E	0	2	0	5	0	1.047049290951141	0	0.8996275471501252	1	2.5	0.7403756538681182	ENOG411CP8E	Xelaev18033921m.g, Xelaev18032259m.g	Xenbase_9.1	ubr5.S, ubr5.L	NA	O95071	UBR5	EDD EDD1 HYD KIAA0896	Ubiquitin protein ligase E3 component n-recognin 5	0.22953604364883531	0.7351687540695494	FALSE	FALSE	FALSE
ENOG411DG9T	0	2	0	5	0	1.047049290951141	0	0.8996275471501252	1	2.5	0.7403756538681182	ENOG411DG9T	126631290, 1311667, 141795861, 147902700, 148236917, 157831120, 161611711, 28839627, 50416449, 83405227, Xelaev18004555m.g, Xelaev18001532m.g, Xelaev18028159m.g, Xelaev18004556m.g, Xelaev18030159m.g	GenBank, Xenbase_9.1	Xelaev18004555m.g, Xelaev18001532m.g, loc101731153.L, loc100487577-like.1.S, loc101731153.S	Xnf7 protein [Xenopus laevis], nuclear factor 7 [Xenopus laevis], Unknown (protein for IMAGE:8527468) [Xenopus laevis], nuclear factor 7, brain [Xenopus laevis], tripartite motif containing 62 [Xenopus laevis], Chain A, Xnf7 Bbox, Developmental Protein, Ph 7.5, 30 C, With Zinc, Nmr, 1 Structure, MGC52568 protein [Xenopus laevis], Rnf36 protein [Xenopus laevis], Unknown (protein for IMAGE:4202738)…	NA	NA	NA	tripartite motif containing 69	0.22953604364883531	0.7351687540695494	FALSE	FALSE	FALSE
ENOG411CT6N	0	2	0	5	0	1.047049290951141	0	0.8996275471501252	1	2.5	0.7403756538681182	ENOG411CT6N	133802, Xelaev18009759m.g	GenBank, Xenbase_9.1	rps15.S	RecName: Full=40S ribosomal protein S15; AltName: Full=RIG protein, NA	P62841	RPS15	RIG	ribosomal protein S15	0.22953604364883531	0.7351687540695494	FALSE	FALSE	FALSE
ENOG411CQ77	2	9	3	12	0.5690497043132894	0.4747678877417178	0.5450980398432168	0.2781391704038551	5.5	7.5	0.7380904976639089	ENOG411CQ77	148234619, Xelaev18044865m.g, Xelaev18028448m.g	GenBank, Xenbase_9.1	cps1.L, cad.L	carbamoyl-phosphate synthase 1, mitochondrial [Xenopus laevis], NA	P27708, P31327	CAD, CPS1	NA	Carbamoyl-phosphate synthetase 2, aspartate transcarbamylase, and dihydroorotase	0.23022972885186338	0.7351687540695494	FALSE	FALSE	FALSE
ENOG411CWJS	0	4	0	8	0	1.0337743616704762	0	0.7476244537050754	2	4	0.7309888613539882	ENOG411CWJS	147900624, 28422615, 54311187	GenBank	NA	ErbB3-binding protein 1 [Xenopus laevis], Pa2g4 protein [Xenopus laevis]	Q9UQ80, H0YIN7	PA2G4, NA	EBP1, NA	proliferation-associated 2G4, 38kDa	0.23239297827210795	0.7351687540695494	FALSE	FALSE	FALSE
ENOG411CRM1	0	0	1	0	1.0324492591630055	0	1.1300605405643729	0	0	0.5	0.7300518723851883	ENOG411CRM1	161612265, 350606385, Xelaev18037997m.g	GenBank, Xenbase_9.1	ubxn10.S	LOC100127299 protein [Xenopus laevis], UBX domain protein 10 [Xenopus laevis], NA	Q96LJ8	UBXN10	UBXD3	UBX domain protein 10	0.23267923897832685	0.7351687540695494	FALSE	FALSE	FALSE
ENOG411CUSQ	0	0	1	0	1.0324492591630055	0	1.1300605405643729	0	0	0.5	0.7300518723851883	ENOG411CUSQ	112419228, 163915601, 51703942, Xelaev18042098m.g, Xelaev18038711m.g, Xelaev18013189m.g	GenBank, Xenbase_9.1	Xelaev18042098m.g, Xelaev18038711m.g, loc100490530.L	Unknown (protein for MGC:154251) [Xenopus laevis], LOC100137677 protein [Xenopus laevis], LOC446941 protein [Xenopus laevis], NA	A0A0B4J2D5, P0DPI2	GATD3B, GATD3A	HES1 KNPI, C21orf33	ES1 protein homolog, mitochondrial-like	0.23267923897832685	0.7351687540695494	FALSE	FALSE	FALSE
ENOG411CRPS	0	0	1	0	1.0324492591630055	0	1.1300605405643729	0	0	0.5	0.7300518723851883	ENOG411CRPS	Xelaev18005688m.g	Xenbase_9.1	prdm5.L	NA	Q9NQX1	PRDM5	PFM2	PR domain containing 5	0.23267923897832685	0.7351687540695494	FALSE	FALSE	FALSE
ENOG411CPBQ	0	0	0	1	0	0.9798623840451678	0	0.8996275471501252	0	0.5	0.6928673363879552	ENOG411CPBQ	Xelaev18023474m.g, Xelaev18025510m.g	Xenbase_9.1	prpf38b.L, prpf38b.S	NA	Q5VTL8	PRPF38B	NA	PRP38 pre-mRNA processing factor 38 (Yeast) domain containing B	0.2441964048605287	0.7351687540695494	FALSE	FALSE	FALSE
ENOG411CVNB	0	0	0	1	0	0.9798623840451678	0	0.8996275471501252	0	0.5	0.6928673363879552	ENOG411CVNB	147898755	GenBank	NA	secretory carrier membrane protein 3 [Xenopus laevis]	O14828	SCAMP3	C1orf3 PROPIN1	secretory carrier membrane protein 3	0.2441964048605287	0.7351687540695494	FALSE	FALSE	FALSE
ENOG411CYSI	0	0	0	1	0	0.9798623840451678	0	0.8996275471501252	0	0.5	0.6928673363879552	ENOG411CYSI	148223287, Xelaev18043991m.g, Xelaev18046645m.g	GenBank, Xenbase_9.1	chmp4b.L, chmp4b.S	charged multivesicular body protein 4b [Xenopus laevis], NA	Q9H444, P59074	CHMP4B, CHMP4BP1	C20orf178 SHAX1, NA	Charged multivesicular body protein 4b	0.2441964048605287	0.7351687540695494	FALSE	FALSE	FALSE
ENOG411CUJY	0	0	0	1	0	0.9798623840451678	0	0.8996275471501252	0	0.5	0.6928673363879552	ENOG411CUJY	Xelaev18009233m.g, Xelaev18013708m.g, Xelaev18005498m.g, Xelaev18016163m.g	Xenbase_9.1	lrba.S, Xetrov90006664m.L, lrba.L, Xetrov90006664m.S	NA	Q8NFP9, P50851	NBEA, LRBA	BCL8B KIAA1544 LYST2, BGL CDC4L LBA	LPS-responsive vesicle trafficking, beach and anchor containing	0.2441964048605287	0.7351687540695494	FALSE	FALSE	FALSE
ENOG411CUMD	0	0	0	1	0	0.9798623840451678	0	0.8996275471501252	0	0.5	0.6928673363879552	ENOG411CUMD	147903687, Xelaev18012112m.g	GenBank, Xenbase_9.1	lin28a.L	protein lin-28 homolog A [Xenopus laevis], NA	Q9H9Z2	LIN28A	CSDD1 LIN28 ZCCHC1	lin-28 homolog A (C. elegans)	0.2441964048605287	0.7351687540695494	FALSE	FALSE	FALSE
ENOG411CUU2	0	0	0	1	0	0.9798623840451678	0	0.8996275471501252	0	0.5	0.6928673363879552	ENOG411CUU2	148231943	GenBank	NA	general transcription factor IIF subunit 2 [Xenopus laevis]	P13984	GTF2F2	RAP30	General transcription factor IIF, polypeptide 2, 30kDa	0.2441964048605287	0.7351687540695494	FALSE	FALSE	FALSE
ENOG411CWFT	0	0	0	1	0	0.9798623840451678	0	0.8996275471501252	0	0.5	0.6928673363879552	ENOG411CWFT	147900295, 147904072, 37589366, Xelaev18039186m.g, Xelaev18042456m.g	GenBank, Xenbase_9.1	bag6.L, bag6.S	large proline-rich protein bag6-B [Xenopus laevis], large proline-rich protein bag6-A [Xenopus laevis], Bat2-a protein [Xenopus laevis], NA	P46379	BAG6	BAT3 G3	BCL2-associated athanogene 6	0.2441964048605287	0.7351687540695494	FALSE	FALSE	FALSE
ENOG411CSRR	0	0	0	1	0	0.9798623840451678	0	0.8996275471501252	0	0.5	0.6928673363879552	ENOG411CSRR	134024835, 148233259, 71051890, Xelaev18005591m.g, Xelaev18009309m.g	GenBank, Xenbase_9.1	larp1b.L, larp1b.S	LOC100049139 protein [Xenopus laevis], La ribonucleoprotein domain family, member 1B [Xenopus laevis], Unknown (protein for IMAGE:6877171) [Xenopus laevis], NA	Q6PKG0, Q659C4	LARP1, LARP1B	KIAA0731 LARP, LARP2	La ribonucleoprotein domain family member	0.2441964048605287	0.7351687540695494	FALSE	FALSE	FALSE
Xelaev18020045m.g	0	0	0	1	0	0.9798623840451678	0	0.8996275471501252	0	0.5	0.6928673363879552	Xelaev18020045m.g	NA	Xenbase_9.1	tcof1.S	NA	NA	NA	NA	NA	0.2441964048605287	0.7351687540695494	FALSE	FALSE	FALSE
ENOG411CV57	0	0	0	1	0	0.9798623840451678	0	0.8996275471501252	0	0.5	0.6928673363879552	ENOG411CV57	147898532, Xelaev18027913m.g, Xelaev18029951m.g	GenBank, Xenbase_9.1	trip12.L, trip12.S	uncharacterized protein LOC414478 [Xenopus laevis], NA	Q14669	TRIP12	KIAA0045 ULF	thyroid hormone receptor interactor 12	0.2441964048605287	0.7351687540695494	FALSE	FALSE	FALSE
ENOG411D5NV	0	0	0	1	0	0.9798623840451678	0	0.8996275471501252	0	0.5	0.6928673363879552	ENOG411D5NV	Xelaev18016097m.g, Xelaev18013643m.g	Xenbase_9.1	cox14.S, cox14.L	NA	Q96I36	COX14	C12orf62	cytochrome c oxidase assembly homolog 14 (S. cerevisiae)	0.2441964048605287	0.7351687540695494	FALSE	FALSE	FALSE
ENOG411CU7Y	0	0	0	1	0	0.9798623840451678	0	0.8996275471501252	0	0.5	0.6928673363879552	ENOG411CU7Y	148233830	GenBank	NA	apolipoprotein O [Xenopus laevis]	Q9BUR5	APOO	FAM121B MIC23 MIC26	apolipoprotein O	0.2441964048605287	0.7351687540695494	FALSE	FALSE	FALSE
ENOG411CSYY	0	0	0	1	0	0.9798623840451678	0	0.8996275471501252	0	0.5	0.6928673363879552	ENOG411CSYY	147904591, 66911543, Xelaev18039492m.g	GenBank, Xenbase_9.1	snw1.L	SNW domain containing 1 [Xenopus laevis], Unknown (protein for IMAGE:3379214) [Xenopus laevis], NA	Q13573	SNW1	SKIIP SKIP	SNW domain containing 1	0.2441964048605287	0.7351687540695494	FALSE	FALSE	FALSE
ENOG411CQK3	0	0	0	1	0	0.9798623840451678	0	0.8996275471501252	0	0.5	0.6928673363879552	ENOG411CQK3	148222138	GenBank	NA	D-tyrosyl-tRNA deacylase 1 homolog [Xenopus laevis]	Q8TEA8, A0A087WZV9	DTD1, NA	C20orf88 DUEB HARS2, NA	Hydrolyzes D-tyrosyl-tRNA(Tyr) into D-tyrosine and free tRNA(Tyr). Could be a defense mechanism against a harmful effect of D-tyrosine (By similarity)	0.2441964048605287	0.7351687540695494	FALSE	FALSE	FALSE
ENOG411CZJS	0	0	0	1	0	0.9798623840451678	0	0.8996275471501252	0	0.5	0.6928673363879552	ENOG411CZJS	Xelaev18012356m.g	Xenbase_9.1	ddx20.L	NA	Q9UHI6	DDX20	DP103 GEMIN3	DEAD (Asp-Glu-Ala-Asp) box polypeptide 20	0.2441964048605287	0.7351687540695494	FALSE	FALSE	FALSE
ENOG411CT0T	0	0	0	1	0	0.9798623840451678	0	0.8996275471501252	0	0.5	0.6928673363879552	ENOG411CT0T	114108280, 148229870, Xelaev18042188m.g	GenBank, Xenbase_9.1	hmgb3.S	LOC734200 protein [Xenopus laevis], high mobility group box 3 [Xenopus laevis], NA	O15347	HMGB3	HMG2A HMG4	high mobility group box 3	0.2441964048605287	0.7351687540695494	FALSE	FALSE	FALSE
ENOG411CZR2	0	0	0	1	0	0.9798623840451678	0	0.8996275471501252	0	0.5	0.6928673363879552	ENOG411CZR2	147898642, 147899716, Xelaev18002056m.g	GenBank, Xenbase_9.1	gps1.S	COP9 signalosome complex subunit 1 [Xenopus laevis], uncharacterized protein LOC734596 [Xenopus laevis], NA	Q13098	GPS1	COPS1 CSN1	G protein pathway suppressor 1	0.2441964048605287	0.7351687540695494	FALSE	FALSE	FALSE
ENOG411CZRP	0	0	0	1	0	0.9798623840451678	0	0.8996275471501252	0	0.5	0.6928673363879552	ENOG411CZRP	Xelaev18006732m.g	Xenbase_9.1	focad.L	NA	Q5VW36	FOCAD	KIAA1797	focadhesin	0.2441964048605287	0.7351687540695494	FALSE	FALSE	FALSE
ENOG411D4D5	0	0	0	1	0	0.9798623840451678	0	0.8996275471501252	0	0.5	0.6928673363879552	ENOG411D4D5	148223303, Xelaev18043828m.g	GenBank, Xenbase_9.1	ccdc56.L	MGC84009 protein [Xenopus laevis], NA	Q9Y2R0	COA3	CCDC56 MITRAC12	cytochrome c oxidase assembly factor 3	0.2441964048605287	0.7351687540695494	FALSE	FALSE	FALSE
ENOG411CQ18	0	0	0	1	0	0.9798623840451678	0	0.8996275471501252	0	0.5	0.6928673363879552	ENOG411CQ18	148226440, 148231277, Xelaev18020353m.g	GenBank, Xenbase_9.1	anxa4.S	MGC82879 protein [Xenopus laevis], annexin A4 [Xenopus laevis], NA	P09525	ANXA4	ANX4	annexin A4	0.2441964048605287	0.7351687540695494	FALSE	FALSE	FALSE
ENOG411CX7E	0	0	0	1	0	0.9798623840451678	0	0.8996275471501252	0	0.5	0.6928673363879552	ENOG411CX7E	147898624, 148227279	GenBank	NA	uncharacterized protein LOC414579 [Xenopus laevis], receptor accessory protein 5 [Xenopus laevis]	Q00765	REEP5	C5orf18 DP1 TB2	Receptor accessory protein 5	0.2441964048605287	0.7351687540695494	FALSE	FALSE	FALSE
ENOG411CUNC	0	0	0	1	0	0.9798623840451678	0	0.8996275471501252	0	0.5	0.6928673363879552	ENOG411CUNC	147906304, Xelaev18022826m.g	GenBank, Xenbase_9.1	vac14.L	protein VAC14 homolog [Xenopus laevis], NA	Q08AM6	VAC14	TAX1BP2 TRX	vac14 homolog (S. cerevisiae)	0.2441964048605287	0.7351687540695494	FALSE	FALSE	FALSE
ENOG411D38J	0	0	0	1	0	0.9798623840451678	0	0.8996275471501252	0	0.5	0.6928673363879552	ENOG411D38J	147899708, 148224668, Xelaev18024387m.g	GenBank, Xenbase_9.1	Xelaev18024387m.g	MGC83384 protein [Xenopus laevis], MGC83035 protein [Xenopus laevis], NA	Q13442	PDAP1	HASPP28	PDGFA associated protein 1	0.2441964048605287	0.7351687540695494	FALSE	FALSE	FALSE
ENOG411CXVH	0	0	0	1	0	0.9798623840451678	0	0.8996275471501252	0	0.5	0.6928673363879552	ENOG411CXVH	Xelaev18022128m.g	Xenbase_9.1	lgals12.L	NA	Q96DT0	LGALS12	GRIP1	Lectin, galactoside-binding, soluble, 12	0.2441964048605287	0.7351687540695494	FALSE	FALSE	FALSE
ENOG411CYCK	0	0	0	1	0	0.9798623840451678	0	0.8996275471501252	0	0.5	0.6928673363879552	ENOG411CYCK	147899844, 148236149, Xelaev18012059m.g	GenBank, Xenbase_9.1	snrnp40.L	small nuclear ribonucleoprotein 40kDa (U5) [Xenopus laevis], NA	Q96DI7	SNRNP40	PRP8BP SFP38 WDR57	small nuclear ribonucleoprotein 40kDa (U5)	0.2441964048605287	0.7351687540695494	FALSE	FALSE	FALSE
ENOG411CT86	0	0	0	1	0	0.9798623840451678	0	0.8996275471501252	0	0.5	0.6928673363879552	ENOG411CT86	148226196, 27694989, 39963558, Xelaev18031081m.g, Xelaev18033141m.g, Xelaev18037352m.g, Xelaev18035296m.g	GenBank, Xenbase_9.1	stt3b.L, stt3b.S, stt3a.S, stt3a.L	STT3, subunit of the oligosaccharyltransferase complex, homolog A [Xenopus laevis], Itm1 protein [Xenopus laevis], LOC779022 protein [Xenopus laevis], NA	P46977, Q8TCJ2	STT3A, STT3B	ITM1 TMC, SIMP	STT3, subunit of the oligosaccharyltransferase complex, homolog	0.2441964048605287	0.7351687540695494	FALSE	FALSE	FALSE
ENOG411CYBI	0	0	0	1	0	0.9798623840451678	0	0.8996275471501252	0	0.5	0.6928673363879552	ENOG411CYBI	134035029, 148231690, 46253608, Xelaev18022235m.g, Xelaev18024212m.g	GenBank, Xenbase_9.1	rtn3.L, rtn3.S	RecName: Full=Reticulon-3-A; AltName: Full=RTN3.1, reticulon-3-B [Xenopus laevis], RTN3 [Xenopus laevis], NA	O95197	RTN3	ASYIP NSPL2	Reticulon 3	0.2441964048605287	0.7351687540695494	FALSE	FALSE	FALSE
ENOG411CR17	0	0	0	1	0	0.9798623840451678	0	0.8996275471501252	0	0.5	0.6928673363879552	ENOG411CR17	147899678, 148232138, Xelaev18005003m.g, Xelaev18034486m.g, Xelaev18017351m.g, Xelaev18021330m.g, Xelaev18036811m.g, Xelaev18008842m.g	GenBank, Xenbase_9.1	kdm3a.L, jmjd1c.L, kdm3b.L, kdm3b.S, jmjd1c.S, kdm3a.S	lysine-specific demethylase 3A-B [Xenopus laevis], lysine-specific demethylase 3A-A [Xenopus laevis], NA	Q15652, Q7LBC6, Q9Y4C1	JMJD1C, KDM3B, KDM3A	JHDM2C KIAA1380 TRIP8, C5orf7 JHDM2B JMJD1B KIAA1082, JHDM2A JMJD1 JMJD1A KIAA0742 TSGA	lysine (K)-specific demethylase	0.2441964048605287	0.7351687540695494	FALSE	FALSE	FALSE
ENOG411CVP1	0	0	0	1	0	0.9798623840451678	0	0.8996275471501252	0	0.5	0.6928673363879552	ENOG411CVP1	114108200	GenBank	NA	MGC154901 protein [Xenopus laevis]	P48728	AMT	GCST	The glycine cleavage system catalyzes the degradation of glycine (By similarity)	0.2441964048605287	0.7351687540695494	FALSE	FALSE	FALSE
ENOG411CVPM	0	0	0	1	0	0.9798623840451678	0	0.8996275471501252	0	0.5	0.6928673363879552	ENOG411CVPM	148222043, 148234565, 49522277, 66910675	GenBank	NA	eukaryotic translation initiation factor 2, subunit 2 beta, 38kDa [Xenopus laevis], uncharacterized protein LOC779195 [Xenopus laevis], LOC780740 protein [Xenopus laevis]	P20042	EIF2S2	EIF2B	eukaryotic translation initiation factor 2, subunit 2 beta, 38kDa	0.2441964048605287	0.7351687540695494	FALSE	FALSE	FALSE
ENOG411CXNY	0	0	0	1	0	0.9798623840451678	0	0.8996275471501252	0	0.5	0.6928673363879552	ENOG411CXNY	147898817, 156119493, 52139155, Xelaev18043145m.g, Xelaev18045906m.g	GenBank, Xenbase_9.1	wipf2.L, wipf2.S	uncharacterized protein LOC379669 [Xenopus laevis], WAS/WASL interacting protein family, member 2 [Xenopus laevis], LOC397922 protein [Xenopus laevis], NA	Q8TF74	WIPF2	WICH WIRE	WAS WASL interacting protein family, member 2	0.2441964048605287	0.7351687540695494	FALSE	FALSE	FALSE
ENOG411CUGY	0	0	0	1	0	0.9798623840451678	0	0.8996275471501252	0	0.5	0.6928673363879552	ENOG411CUGY	115291995, 116487533, Xelaev18045280m.g, Xelaev18047585m.g	GenBank, Xenbase_9.1	dnaaf5.L, dnaaf5.S	LOC496065 protein [Xenopus laevis], MGC154857 protein [Xenopus laevis], NA	Q86Y56	DNAAF5	HEATR2	HEAT repeat containing 2	0.2441964048605287	0.7351687540695494	FALSE	FALSE	FALSE
Xelaev18034139m.g	0	0	0	1	0	0.9798623840451678	0	0.8996275471501252	0	0.5	0.6928673363879552	Xelaev18034139m.g	NA	Xenbase_9.1	loc494814.S	NA	NA	NA	NA	NA	0.2441964048605287	0.7351687540695494	FALSE	FALSE	FALSE
ENOG411CVPZ	0	0	0	1	0	0.9798623840451678	0	0.8996275471501252	0	0.5	0.6928673363879552	ENOG411CVPZ	147903972, 148229260, 148230276, Xelaev18010436m.g, Xelaev18001321m.g, Xelaev18002253m.g	GenBank, Xenbase_9.1	pitpnb.2.S, Xelaev18001321m.g, Xelaev18002253m.g	phosphatidylinositol transfer protein, beta [Xenopus laevis], phosphatidylinositol transfer protein, alpha [Xenopus laevis], NA	P48739	PITPNB	NA	phosphatidylinositol transfer protein beta	0.2441964048605287	0.7351687540695494	FALSE	FALSE	FALSE
ENOG411DFBB	0	0	0	1	0	0.9798623840451678	0	0.8996275471501252	0	0.5	0.6928673363879552	ENOG411DFBB	Xelaev18003636m.g, Xelaev18044082m.g, Xelaev18003892m.g	Xenbase_9.1	None	NA	NA	NA	NA	envoplakin	0.2441964048605287	0.7351687540695494	FALSE	FALSE	FALSE
ENOG411CWNN	0	0	0	1	0	0.9798623840451678	0	0.8996275471501252	0	0.5	0.6928673363879552	ENOG411CWNN	123899802, 125858668, 163916490, Xelaev18025296m.g, Xelaev18025463m.g, Xelaev18004431m.g, Xelaev18023208m.g, Xelaev18023420m.g, Xelaev18000744m.g	GenBank, Xenbase_9.1	loc100498184.S, loc101735200.S, loc100495666.L, loc100498184.L, loc101735200.L, loc100495666.S	RecName: Full=Tctex1 domain-containing protein 1-A, Tctex1d1-b protein [Xenopus laevis], NA	Q8N7M0	TCTEX1D1	NA	Tctex1 domain containing 1	0.2441964048605287	0.7351687540695494	FALSE	FALSE	FALSE
ENOG411D343	0	0	0	1	0	0.9798623840451678	0	0.8996275471501252	0	0.5	0.6928673363879552	ENOG411D343	147904284, Xelaev18006241m.g, Xelaev18009771m.g	GenBank, Xenbase_9.1	atp5d.L, atp5d.S	ATP synthase, H+ transporting, mitochondrial F1 complex, delta subunit [Xenopus laevis], NA	P30049	ATP5F1D	ATP5D	ATP synthase H transporting mitochondrial F1 complex delta subunit	0.2441964048605287	0.7351687540695494	FALSE	FALSE	FALSE
ENOG411CW5M	0	0	0	1	0	0.9798623840451678	0	0.8996275471501252	0	0.5	0.6928673363879552	ENOG411CW5M	159155502, Xelaev18010361m.g, Xelaev18012772m.g, Xelaev18015373m.g, Xelaev18007417m.g	GenBank, Xenbase_9.1	nipsnap1.S, gbas.L, gbas.S, nipsnap1.L	LOC100127251 protein [Xenopus laevis], NA	O75323, Q9BPW8	NIPSNAP2, NIPSNAP1	GBAS, NA	Glioblastoma amplified sequence	0.2441964048605287	0.7351687540695494	FALSE	FALSE	FALSE
ENOG411CP66	0	0	0	1	0	0.9798623840451678	0	0.8996275471501252	0	0.5	0.6928673363879552	ENOG411CP66	1161304, Xelaev18035875m.g	GenBank, Xenbase_9.1	lig1.L	ligase I [Xenopus laevis], NA	P18858	LIG1	NA	Ligase I, DNA, ATP-dependent	0.2441964048605287	0.7351687540695494	FALSE	FALSE	FALSE
ENOG411D04M	0	0	0	1	0	0.9798623840451678	0	0.8996275471501252	0	0.5	0.6928673363879552	ENOG411D04M	147902441, 148233376, Xelaev18010694m.g	GenBank, Xenbase_9.1	rfc5.S	MGC80325 protein [Xenopus laevis], replication factor C (activator 1) 5, 36.5kDa [Xenopus laevis], NA	P40937	RFC5	NA	replication factor C (activator 1) 5, 36.5kDa	0.2441964048605287	0.7351687540695494	FALSE	FALSE	FALSE
ENOG411CXDV	0	0	0	1	0	0.9798623840451678	0	0.8996275471501252	0	0.5	0.6928673363879552	ENOG411CXDV	120537396, 67678018, Xelaev18042594m.g	GenBank, Xenbase_9.1	supt5h.S	LOC733281 protein [Xenopus laevis], NA	O00267	SUPT5H	SPT5 SPT5H	Suppressor of Ty 5 homolog (S. cerevisiae)	0.2441964048605287	0.7351687540695494	FALSE	FALSE	FALSE
ENOG411CVXR	0	0	0	1	0	0.9798623840451678	0	0.8996275471501252	0	0.5	0.6928673363879552	ENOG411CVXR	147901418, 47122884, Xelaev18011729m.g, Xelaev18014137m.g	GenBank, Xenbase_9.1	rpa1.L, rpa1.S	replication protein A 70 kDa DNA-binding subunit [Xenopus laevis], LOC397937 protein [Xenopus laevis], NA	P27694	RPA1	REPA1 RPA70	Replication protein A1, 70kDa	0.2441964048605287	0.7351687540695494	FALSE	FALSE	FALSE
ENOG411CZ73	0	0	0	1	0	0.9798623840451678	0	0.8996275471501252	0	0.5	0.6928673363879552	ENOG411CZ73	147902057, 148238016, Xelaev18019956m.g	GenBank, Xenbase_9.1	clint1.S	clathrin interactor 1 [Xenopus laevis], NA	Q14677	CLINT1	ENTH EPN4 EPNR KIAA0171	Clathrin interactor 1	0.2441964048605287	0.7351687540695494	FALSE	FALSE	FALSE
ENOG411CQ2S	0	0	0	1	0	0.9798623840451678	0	0.8996275471501252	0	0.5	0.6928673363879552	ENOG411CQ2S	13235654, Xelaev18017194m.g, Xelaev18021459m.g	GenBank, Xenbase_9.1	kif3a.L, kif3a.S	minesin-like protein [Xenopus laevis], NA	Q9Y496	KIF3A	KIF3	Kinesin family member 3a	0.2441964048605287	0.7351687540695494	FALSE	FALSE	FALSE
ENOG411D3GM	0	0	0	1	0	0.9798623840451678	0	0.8996275471501252	0	0.5	0.6928673363879552	ENOG411D3GM	147907184, Xelaev18024356m.g	GenBank, Xenbase_9.1	mrpl23.S	mitochondrial ribosomal protein L23 [Xenopus laevis], NA	Q16540	MRPL23	L23MRP RPL23L	Mitochondrial ribosomal protein L23	0.2441964048605287	0.7351687540695494	FALSE	FALSE	FALSE
ENOG411CXN4	0	0	0	1	0	0.9798623840451678	0	0.8996275471501252	0	0.5	0.6928673363879552	ENOG411CXN4	124481902, 148223718, Xelaev18002461m.g, Xelaev18019794m.g	GenBank, Xenbase_9.1	agk.L, agk.S	MGC52920 protein [Xenopus laevis], acylglycerol kinase, mitochondrial precursor [Xenopus laevis], NA	Q53H12	AGK	MULK	acylglycerol kinase	0.2441964048605287	0.7351687540695494	FALSE	FALSE	FALSE
ENOG411CQKC	0	0	0	1	0	0.9798623840451678	0	0.8996275471501252	0	0.5	0.6928673363879552	ENOG411CQKC	147900436, 148234245, 213626342, 50418311, Xelaev18010897m.g, Xelaev18008174m.g, Xelaev18020570m.g, Xelaev18040544m.g	GenBank, Xenbase_9.1	iqgap2.S, iqgap2.L, iqgap1-like.1.S, iqgap3.L	IQ motif containing GTPase activating protein 2 [Xenopus laevis], IQ motif containing GTPase activating protein 1 [Xenopus laevis], XIQGAP1 protein [Xenopus laevis], LOC445857 protein [Xenopus laevis], NA	P46940, Q13576, Q86VI3	IQGAP1, IQGAP2, IQGAP3	KIAA0051, NA	IQ motif containing GTPase activating protein	0.2441964048605287	0.7351687540695494	FALSE	FALSE	FALSE
ENOG411CP8N	0	0	0	1	0	0.9798623840451678	0	0.8996275471501252	0	0.5	0.6928673363879552	ENOG411CP8N	116487996, 12003372, 148228088, Xelaev18007697m.g, Xelaev18010543m.g, Xelaev18029887m.g	GenBank, Xenbase_9.1	sept2-a.L, sept2-a.S, sept2.S	XlSeptA protein [Xenopus laevis], septin A [Xenopus laevis], septin-2B [Xenopus laevis], NA	Q15019	SEPTIN2	DIFF6 KIAA0158 NEDD5 SEPT2	septin 2	0.2441964048605287	0.7351687540695494	FALSE	FALSE	FALSE
ENOG411DEZT	0	0	0	1	0	0.9798623840451678	0	0.8996275471501252	0	0.5	0.6928673363879552	ENOG411DEZT	148222274, Xelaev18016495m.g, Xelaev18013970m.g	GenBank, Xenbase_9.1	stard10.S, stard10.L	StAR-related lipid transfer (START) domain containing 10 [Xenopus laevis], NA	NA	NA	NA	StAR-related lipid transfer (START) domain containing 10	0.2441964048605287	0.7351687540695494	FALSE	FALSE	FALSE
ENOG411CURF	0	0	0	1	0	0.9798623840451678	0	0.8996275471501252	0	0.5	0.6928673363879552	ENOG411CURF	118763696, 148234026, 27370842, 46249846, Xelaev18005164m.g	GenBank, Xenbase_9.1	ncapg.L	LOC398088 protein [Xenopus laevis], condensin complex subunit 3 [Xenopus laevis], NA	Q9BPX3	NCAPG	CAPG NYMEL3	Non-SMC condensin I complex subunit G	0.2441964048605287	0.7351687540695494	FALSE	FALSE	FALSE
ENOG411CQC2	0	0	0	1	0	0.9798623840451678	0	0.8996275471501252	0	0.5	0.6928673363879552	ENOG411CQC2	147899690, 147902734, 147904402, 1777328, 189217830, 189217832, 6456872, Xelaev18008770m.g, Xelaev18032738m.g, Xelaev18030531m.g	GenBank, Xenbase_9.1	cdc25b.S, cdc25a.S, cdc25a.L	cell division cycle 25 homolog A [Xenopus laevis], uncharacterized protein LOC494708 [Xenopus laevis], tyrosine phosphatase Cdc25A [Xenopus laevis], Cdc25A [Xenopus laevis], cell division cycle 25 homolog B [Xenopus laevis], NA	P30304, P30305	CDC25A, CDC25B	NA, CDC25HU2	cell division cycle 25 homolog	0.2441964048605287	0.7351687540695494	FALSE	FALSE	FALSE
ENOG411CX7V	0	0	0	1	0	0.9798623840451678	0	0.8996275471501252	0	0.5	0.6928673363879552	ENOG411CX7V	147900810, Xelaev18045232m.g, Xelaev18047547m.g	GenBank, Xenbase_9.1	eif3b.L, eif3b.S	eukaryotic translation initiation factor 3 subunit B [Xenopus laevis], NA	P55884	EIF3B	EIF3S9	Component of the eukaryotic translation initiation factor 3 (eIF-3) complex, which is involved in protein synthesis and, together with other initiation factors, stimulates binding of mRNA and methionyl-tRNAi to the 40S ribosome (By similarity)	0.2441964048605287	0.7351687540695494	FALSE	FALSE	FALSE
ENOG411CPZJ	0	0	0	1	0	0.9798623840451678	0	0.8996275471501252	0	0.5	0.6928673363879552	ENOG411CPZJ	147898829, 148229220, 148233195, Xelaev18008405m.g, Xelaev18011053m.g	GenBank, Xenbase_9.1	sec11c.L, sec11c.S	SEC11 homolog C [Xenopus laevis], SEC11 homolog A [Xenopus laevis], MGC82823 protein [Xenopus laevis], NA	P67812, Q9BY50, P0C7V7	SEC11A, SEC11C, SEC11B	SEC11L1 SPC18 SPCS4A, SEC11L3 SPC21 SPCS4C, SEC11L2 SPCS4B	SEC11 homolog A (S. cerevisiae)	0.2441964048605287	0.7351687540695494	FALSE	FALSE	FALSE
ENOG411CPC4	0	0	0	1	0	0.9798623840451678	0	0.8996275471501252	0	0.5	0.6928673363879552	ENOG411CPC4	Xelaev18009576m.g, Xelaev18005904m.g, Xelaev18005903m.g, Xelaev18009575m.g	Xenbase_9.1	tmprss11f.S, tmprss11f.L, Xelaev18005903m.g, tmprss11a.S	NA	Q9UL52, Q6ZWK6, Q6ZMR5	TMPRSS11E, TMPRSS11F, TMPRSS11A	DESC1 TMPRSS11E2, HATL4, ECRG1 HATL1 HESP	transmembrane protease serine	0.2441964048605287	0.7351687540695494	FALSE	FALSE	FALSE
ENOG411D032	0	0	0	1	0	0.9798623840451678	0	0.8996275471501252	0	0.5	0.6928673363879552	ENOG411D032	147904874, Xelaev18014576m.g	GenBank, Xenbase_9.1	prpf8.S	PRP8 pre-mRNA processing factor 8 homolog [Xenopus laevis], NA	Q6P2Q9	PRPF8	PRPC8	PRP8 pre-mRNA processing factor 8 homolog (S. cerevisiae)	0.2441964048605287	0.7351687540695494	FALSE	FALSE	FALSE
ENOG411CS3Y	0	0	0	1	0	0.9798623840451678	0	0.8996275471501252	0	0.5	0.6928673363879552	ENOG411CS3Y	120537954, 147906200, Xelaev18017331m.g, Xelaev18018585m.g, Xelaev18021350m.g, Xelaev18020307m.g	GenBank, Xenbase_9.1	lman2.L, lman2l.L, lman2.S, lman2l.S	LOC100036857 protein [Xenopus laevis], uncharacterized protein LOC734646 [Xenopus laevis], NA	Q9H0V9, Q12907	LMAN2L, LMAN2	VIPL, C5orf8	lectin mannose-binding	0.2441964048605287	0.7351687540695494	FALSE	FALSE	FALSE
ENOG411CRW9	0	0	0	1	0	0.9798623840451678	0	0.8996275471501252	0	0.5	0.6928673363879552	ENOG411CRW9	147898819, 54261493, Xelaev18036863m.g, Xelaev18034570m.g	GenBank, Xenbase_9.1	glrx3.S, glrx3.L	glutaredoxin 3 [Xenopus laevis], LOC495269 protein [Xenopus laevis], NA	O76003	GLRX3	PICOT TXNL2	Glutaredoxin 3	0.2441964048605287	0.7351687540695494	FALSE	FALSE	FALSE
ENOG411CSY9	0	0	0	1	0	0.9798623840451678	0	0.8996275471501252	0	0.5	0.6928673363879552	ENOG411CSY9	147905097, 51703709, Xelaev18005678m.g, Xelaev18037141m.g, Xelaev18034885m.g, Xelaev18009370m.g	GenBank, Xenbase_9.1	sec24d-like.1.L, sec24d-like.2.S, sec24d-like.2.L, sec24d-like.1.S	SEC24 family, member D [Xenopus laevis], LOC446945 protein [Xenopus laevis], NA	P53992, O94855	SEC24C, SEC24D	KIAA0079, KIAA0755	SEC24 family, member	0.2441964048605287	0.7351687540695494	FALSE	FALSE	FALSE
ENOG411CUC0	0	0	0	1	0	0.9798623840451678	0	0.8996275471501252	0	0.5	0.6928673363879552	ENOG411CUC0	Xelaev18016911m.g	Xenbase_9.1	mrpl22.L	NA	Q9NWU5	MRPL22	MRPL25 RPML25	mitochondrial ribosomal protein L22	0.2441964048605287	0.7351687540695494	FALSE	FALSE	FALSE
ENOG411D0N8	0	0	0	1	0	0.9798623840451678	0	0.8996275471501252	0	0.5	0.6928673363879552	ENOG411D0N8	147901339, Xelaev18028480m.g, Xelaev18026519m.g	GenBank, Xenbase_9.1	commd1.S, commd1.L	copper metabolism (Murr1) domain containing 1 [Xenopus laevis], NA	Q8N668	COMMD1	C2orf5 MURR1	Copper metabolism (Murr1) domain containing 1	0.2441964048605287	0.7351687540695494	FALSE	FALSE	FALSE
ENOG411CQTH	0	0	0	1	0	0.9798623840451678	0	0.8996275471501252	0	0.5	0.6928673363879552	ENOG411CQTH	147907240, 148228448, 148231573, 38303923, Xelaev18018634m.g, Xelaev18035017m.g	GenBank, Xenbase_9.1	ogdh.L, ogdhl.L	2-oxoglutarate dehydrogenase-like, mitochondrial precursor [Xenopus laevis], MGC80496 protein [Xenopus laevis], 2-oxoglutarate dehydrogenase, mitochondrial precursor [Xenopus laevis], Ogdh protein [Xenopus laevis], NA	Q02218, Q9ULD0	OGDH, OGDHL	NA, KIAA1290	oxoglutarate (alpha-ketoglutarate) dehydrogenase (lipoamide)	0.2441964048605287	0.7351687540695494	FALSE	FALSE	FALSE
ENOG411D46D	0	0	0	1	0	0.9798623840451678	0	0.8996275471501252	0	0.5	0.6928673363879552	ENOG411D46D	148232162	GenBank	NA	vesicle-associated membrane protein 1 (synaptobrevin 1) [Xenopus laevis]	Q15836	VAMP3	SYB3	Vesicle-associated membrane protein 3	0.2441964048605287	0.7351687540695494	FALSE	FALSE	FALSE
ENOG411CVK1	0	0	0	1	0	0.9798623840451678	0	0.8996275471501252	0	0.5	0.6928673363879552	ENOG411CVK1	124481826, 147903185, Xelaev18002360m.g, Xelaev18014169m.g	GenBank, Xenbase_9.1	unnamed, nufip2.S	LOC100037153 protein [Xenopus laevis], MGC86495 protein [Xenopus laevis], NA	Q7Z417	NUFIP2	KIAA1321	nuclear fragile X mental retardation protein interacting protein 2	0.2441964048605287	0.7351687540695494	FALSE	FALSE	FALSE
ENOG411CVCR	0	0	0	1	0	0.9798623840451678	0	0.8996275471501252	0	0.5	0.6928673363879552	ENOG411CVCR	148232581, Xelaev18020836m.g, Xelaev18027356m.g	GenBank, Xenbase_9.1	hmgcl.S, hmgcll1.L	3-hydroxymethyl-3-methylglutaryl-CoA lyase [Xenopus laevis], NA	Q8TB92, P35914	HMGCLL1, HMGCL	NA	3-hydroxymethyl-3-methylglutaryl-CoA lyase	0.2441964048605287	0.7351687540695494	FALSE	FALSE	FALSE
ENOG411CSFD	0	0	0	1	0	0.9798623840451678	0	0.8996275471501252	0	0.5	0.6928673363879552	ENOG411CSFD	1334661, 147903139, 148229787, 391931	GenBank	NA	NAD(+) ADP-ribosyltransferase [Xenopus laevis], poly [ADP-ribose] polymerase 1 [Xenopus laevis], uncharacterized protein LOC734426 [Xenopus laevis], poly(ADP-ribose) polymerase [Xenopus laevis]	P09874	PARP1	ADPRT PPOL	Poly (ADP-ribose) polymerase 1	0.2441964048605287	0.7351687540695494	FALSE	FALSE	FALSE
ENOG411CW9M	0	0	0	1	0	0.9798623840451678	0	0.8996275471501252	0	0.5	0.6928673363879552	ENOG411CW9M	126631797, 51704122, Xelaev18012989m.g, Xelaev18015540m.g	GenBank, Xenbase_9.1	eif5b.L, eif5b-like.S	LOC446935 protein [Xenopus laevis], NA	O60841	EIF5B	IF2 KIAA0741	Eukaryotic translation initiation factor 5B	0.2441964048605287	0.7351687540695494	FALSE	FALSE	FALSE
ENOG411D1W5	0	0	0	1	0	0.9798623840451678	0	0.8996275471501252	0	0.5	0.6928673363879552	ENOG411D1W5	Xelaev18005299m.g, Xelaev18009078m.g	Xenbase_9.1	exoc1.L, exoc1.S	NA	Q9NV70	EXOC1	SEC3 SEC3L1	Exocyst complex component 1	0.2441964048605287	0.7351687540695494	FALSE	FALSE	FALSE
ENOG411CTD5	0	0	0	1	0	0.9798623840451678	0	0.8996275471501252	0	0.5	0.6928673363879552	ENOG411CTD5	148227640, 148228018, Xelaev18022770m.g, Xelaev18025031m.g	GenBank, Xenbase_9.1	dnaja2.L, dnaja2.S	DnaJ subfamily A member 2 [Xenopus laevis], DnaJ (Hsp40) homolog, subfamily A, member 2 [Xenopus laevis], NA	O60884	DNAJA2	CPR3 HIRIP4	DnaJ (Hsp40) homolog, subfamily A, member 2	0.2441964048605287	0.7351687540695494	FALSE	FALSE	FALSE
ENOG411CQ5Y	0	0	0	1	0	0.9798623840451678	0	0.8996275471501252	0	0.5	0.6928673363879552	ENOG411CQ5Y	148226174, Xelaev18047834m.g, Xelaev18045611m.g	GenBank, Xenbase_9.1	sept12.S, sept12.L	septin 12 [Xenopus laevis], NA	Q8IYM1	SEPTIN12	12-Sep	Septin 12	0.2441964048605287	0.7351687540695494	FALSE	FALSE	FALSE
ENOG411CZSG	0	0	0	1	0	0.9798623840451678	0	0.8996275471501252	0	0.5	0.6928673363879552	ENOG411CZSG	147905306, 148230617, Xelaev18021659m.g, Xelaev18024664m.g	GenBank, Xenbase_9.1	tsg101.L, tsg101.S	uncharacterized protein LOC414576 [Xenopus laevis], tumor susceptibility gene 101 [Xenopus laevis], NA	Q99816	TSG101	NA	Tumor susceptibility gene 101	0.2441964048605287	0.7351687540695494	FALSE	FALSE	FALSE
ENOG411CTFG	0	0	0	1	0	0.9798623840451678	0	0.8996275471501252	0	0.5	0.6928673363879552	ENOG411CTFG	123896325, Xelaev18009675m.g	GenBank, Xenbase_9.1	ikbkap.S	RecName: Full=Putative elongator complex protein 1; Short=ELP1; AltName: Full=IkappaB kinase complex-associated protein; Short=IKK complex-associated protein, NA	O95163	ELP1	IKAP IKBKAP	Inhibitor of kappa light polypeptide gene enhancer in B-cells, kinase complex-associated protein	0.2441964048605287	0.7351687540695494	FALSE	FALSE	FALSE
ENOG411D0DW	0	0	0	1	0	0.9798623840451678	0	0.8996275471501252	0	0.5	0.6928673363879552	ENOG411D0DW	123899857, 71051894, Xelaev18005350m.g	GenBank, Xenbase_9.1	ufsp2.L	RecName: Full=Ufm1-specific protease 2; Short=UfSP2, MGC130612 protein [Xenopus laevis], NA	Q9NUQ7	UFSP2	C4orf20	ufm1-specific peptidase 2	0.2441964048605287	0.7351687540695494	FALSE	FALSE	FALSE
Xelaev18041845m.g	0	0	0	1	0	0.9798623840451678	0	0.8996275471501252	0	0.5	0.6928673363879552	Xelaev18041845m.g	NA	Xenbase_9.1	Xelaev18041845m.g	NA	NA	NA	NA	NA	0.2441964048605287	0.7351687540695494	FALSE	FALSE	FALSE
ENOG411CRUN	0	0	0	1	0	0.9798623840451678	0	0.8996275471501252	0	0.5	0.6928673363879552	ENOG411CRUN	146327763, Xelaev18016662m.g, Xelaev18016661m.g	GenBank, Xenbase_9.1	atxn10.L, Xelaev18016661m.g	LOC100049766 protein [Xenopus laevis], NA	Q9UBB4	ATXN10	SCA10	ataxin 10	0.2441964048605287	0.7351687540695494	FALSE	FALSE	FALSE
ENOG411CWFZ	0	0	0	1	0	0.9798623840451678	0	0.8996275471501252	0	0.5	0.6928673363879552	ENOG411CWFZ	148225695, Xelaev18018789m.g	GenBank, Xenbase_9.1	ap3m2.L	adaptor-related protein complex 3, mu 2 subunit [Xenopus laevis], NA	Q9Y2T2, P53677	AP3M1, AP3M2	NA	adaptor-related protein complex 3, mu	0.2441964048605287	0.7351687540695494	FALSE	FALSE	FALSE
ENOG411DETC	0	0	0	1	0	0.9798623840451678	0	0.8996275471501252	0	0.5	0.6928673363879552	ENOG411DETC	Xelaev18028600m.g, Xelaev18026331m.g	Xenbase_9.1	fam179a.S, fam179a.L	NA	Q6ZUX3	TOGARAM2	FAM179A	family with sequence similarity 179, member A	0.2441964048605287	0.7351687540695494	FALSE	FALSE	FALSE
ENOG411CPPM	0	0	0	1	0	0.9798623840451678	0	0.8996275471501252	0	0.5	0.6928673363879552	ENOG411CPPM	147899661, 66911567, Xelaev18011330m.g, Xelaev18014398m.g	GenBank, Xenbase_9.1	gpa33.L, gpa33.S	uncharacterized protein LOC734376 precursor [Xenopus laevis], LOC733259 protein [Xenopus laevis], NA	Q99795	GPA33	NA	Glycoprotein A33 (Transmembrane)	0.2441964048605287	0.7351687540695494	FALSE	FALSE	FALSE
ENOG411CR8V	0	0	0	1	0	0.9798623840451678	0	0.8996275471501252	0	0.5	0.6928673363879552	ENOG411CR8V	Xelaev18034678m.g, Xelaev18036967m.g	Xenbase_9.1	lcor.L, lcor.S	NA	NA	NA	NA	chromosome 10 open reading frame 12	0.2441964048605287	0.7351687540695494	FALSE	FALSE	FALSE
ENOG411CY5V	0	0	0	1	0	0.9798623840451678	0	0.8996275471501252	0	0.5	0.6928673363879552	ENOG411CY5V	Xelaev18042627m.g, Xelaev18040022m.g	Xenbase_9.1	akap6-like.S, akap6.L	NA	Q13023	AKAP6	AKAP100 KIAA0311	A kinase (PRKA) anchor protein 6	0.2441964048605287	0.7351687540695494	FALSE	FALSE	FALSE
ENOG411CTCU	0	0	0	1	0	0.9798623840451678	0	0.8996275471501252	0	0.5	0.6928673363879552	ENOG411CTCU	Xelaev18034223m.g, Xelaev18036626m.g	Xenbase_9.1	smndc1.L, smndc1.S	NA	O75940	SMNDC1	SMNR SPF30	Survival motor neuron domain containing 1	0.2441964048605287	0.7351687540695494	FALSE	FALSE	FALSE
ENOG411CP9I	0	0	0	1	0	0.9798623840451678	0	0.8996275471501252	0	0.5	0.6928673363879552	ENOG411CP9I	18139834, Xelaev18039950m.g, Xelaev18041041m.g	GenBank, Xenbase_9.1	baz1a.L, baz1a.S	ATP-utilizing chromatin assembly factor 1 [Xenopus laevis], NA	Q9NRL2	BAZ1A	ACF1 WCRF180	Bromodomain adjacent to zinc finger domain, 1A	0.2441964048605287	0.7351687540695494	FALSE	FALSE	FALSE
ENOG411CV5M	0	0	0	1	0	0.9798623840451678	0	0.8996275471501252	0	0.5	0.6928673363879552	ENOG411CV5M	111598425, 147900768, 148222023, Xelaev18017500m.g, Xelaev18021210m.g	GenBank, Xenbase_9.1	hal.1.L, hal.S	LOC100125662 protein [Xenopus laevis], MGC81887 protein [Xenopus laevis], histidine ammonia-lyase, gene 1 [Xenopus laevis], NA	P42357	HAL	HIS	histidine ammonia-lyase	0.2441964048605287	0.7351687540695494	FALSE	FALSE	FALSE
ENOG411CQMJ	0	0	0	1	0	0.9798623840451678	0	0.8996275471501252	0	0.5	0.6928673363879552	ENOG411CQMJ	Xelaev18019682m.g	Xenbase_9.1	aldh3b1-like.2.L	NA	P43353, P48448	ALDH3B1, ALDH3B2	ALDH7, ALDH8	Aldehyde dehydrogenase 3 family member	0.2441964048605287	0.7351687540695494	FALSE	FALSE	FALSE
ENOG411CZ7W	0	0	0	1	0	0.9798623840451678	0	0.8996275471501252	0	0.5	0.6928673363879552	ENOG411CZ7W	148226322, Xelaev18018755m.g	GenBank, Xenbase_9.1	reep4.L	receptor accessory protein 4 [Xenopus laevis], NA	Q9H6H4	REEP4	C8orf20	receptor accessory protein 4	0.2441964048605287	0.7351687540695494	FALSE	FALSE	FALSE
Xelaev18025581m.g	0	0	0	1	0	0.9798623840451678	0	0.8996275471501252	0	0.5	0.6928673363879552	Xelaev18025581m.g	NA	Xenbase_9.1	Xelaev18025581m.g	NA	NA	NA	NA	NA	0.2441964048605287	0.7351687540695494	FALSE	FALSE	FALSE
ENOG411CYU6	0	0	0	1	0	0.9798623840451678	0	0.8996275471501252	0	0.5	0.6928673363879552	ENOG411CYU6	Xelaev18011275m.g	Xenbase_9.1	fbxo40.L	NA	Q9UH90	FBXO40	FBX40 KIAA1195	F-box protein 40	0.2441964048605287	0.7351687540695494	FALSE	FALSE	FALSE
ENOG411CYAR	0	0	0	1	0	0.9798623840451678	0	0.8996275471501252	0	0.5	0.6928673363879552	ENOG411CYAR	114107802	GenBank	NA	Psmb1 protein [Xenopus laevis]	P20618	PSMB1	PSC5	The proteasome is a multicatalytic proteinase complex which is characterized by its ability to cleave peptides with Arg, Phe, Tyr, Leu, and Glu adjacent to the leaving group at neutral or slightly basic pH. The proteasome has an ATP-dependent proteolytic activity (By similarity)	0.2441964048605287	0.7351687540695494	FALSE	FALSE	FALSE
Xelaev18038181m.g	0	0	0	1	0	0.9798623840451678	0	0.8996275471501252	0	0.5	0.6928673363879552	Xelaev18038181m.g	NA	Xenbase_9.1	Xetrov90028448m.L	NA	NA	NA	NA	NA	0.2441964048605287	0.7351687540695494	FALSE	FALSE	FALSE
ENOG411D12F	0	0	0	1	0	0.9798623840451678	0	0.8996275471501252	0	0.5	0.6928673363879552	ENOG411D12F	116487825, 13603484, 229621705, 66911602, 66911607, Xelaev18006108m.g	GenBank, Xenbase_9.1	chaf1a.L	LOC733264 protein [Xenopus laevis], chromatin assembly factor 1 p150 subunit [Xenopus laevis], RecName: Full=Chromatin assembly factor 1 subunit A-B; Short=CAF-1 subunit A; AltName: Full=Chromatin assembly factor I p150 subunit B; Short=CAF-I 150 kDa subunit B; Short=CAF-I p150-B; Short=xp150, Unknown (protein for MGC:115625) [Xenopus laevis], NA	Q13111	CHAF1A	CAF CAF1P150	Chromatin assembly factor 1, subunit A (P150)	0.2441964048605287	0.7351687540695494	FALSE	FALSE	FALSE
Xelaev18008399m.g	0	0	0	1	0	0.9798623840451678	0	0.8996275471501252	0	0.5	0.6928673363879552	Xelaev18008399m.g	NA	Xenbase_9.1	Xelaev18008399m.g	NA	NA	NA	NA	NA	0.2441964048605287	0.7351687540695494	FALSE	FALSE	FALSE
ENOG411CVGG	0	0	0	1	0	0.9798623840451678	0	0.8996275471501252	0	0.5	0.6928673363879552	ENOG411CVGG	147904318	GenBank	NA	mitochondrial ribosomal protein L21 [Xenopus laevis]	Q7Z2W9	MRPL21	NA	Mitochondrial ribosomal protein L21	0.2441964048605287	0.7351687540695494	FALSE	FALSE	FALSE
ENOG411CSBH	0	0	0	1	0	0.9798623840451678	0	0.8996275471501252	0	0.5	0.6928673363879552	ENOG411CSBH	11119968, 11119970, 213625109, Xelaev18033477m.g, Xelaev18031515m.g, Xelaev18033480m.g, Xelaev18033473m.g, Xelaev18031517m.g, Xelaev18031526m.g	GenBank, Xenbase_9.1	cdh9.S, cdh10.L, cdh10.S, cdh6.S, cdh9.L, cdh6.L	cadherin-6 [Xenopus laevis], cadherin-6' [Xenopus laevis], Cadherin 6, type 2, K-cadherin [Xenopus laevis], NA	P55285, Q9ULB4, Q9Y6N8	CDH6, CDH9, CDH10	NA	Cadherins are calcium dependent cell adhesion proteins (By similarity)	0.2441964048605287	0.7351687540695494	FALSE	FALSE	FALSE
66910877	2	6	2	10	0.11920377284128798	0.8528653720700381	0.1300605405643729	0.5517042437298185	4	6	0.6873566841490074	66910877	NA	GenBank	NA	LOC733268 protein [Xenopus laevis]	NA	NA	NA	NA	0.24592899330429846	0.7377869799128953	FALSE	FALSE	FALSE
ENOG411CZ90	0	2	1	2	1.0324492591630055	-0.08517877068950216	1.1300605405643729	-0.10037245284987478	1	1.5	0.6698213860175074	ENOG411CZ90	148229868, 148230699, Xelaev18021806m.g	GenBank, Xenbase_9.1	api5.L	apoptosis inhibitor 5-A [Xenopus laevis], apoptosis inhibitor 5-B [Xenopus laevis], NA	Q9BZZ5	API5	NA	Apoptosis inhibitor 5	0.2514858294113146	0.7411440686616975	FALSE	FALSE	FALSE
ENOG411D3K9	0	2	1	2	1.0324492591630055	-0.08517877068950216	1.1300605405643729	-0.10037245284987478	1	1.5	0.6698213860175074	ENOG411D3K9	126632069	GenBank	NA	LOC100049122 protein [Xenopus laevis]	Q96DA6	DNAJC19	TIM14 TIMM14	DnaJ (Hsp40) homolog, subfamily C, member 19	0.2514858294113146	0.7411440686616975	FALSE	FALSE	FALSE
ENOG411CTH9	0	1	0	3	0	0.9374450100041284	0	0.8996275471501252	0.5	1.5	0.66287372356341	ENOG411CTH9	148222118, 148223037, 28302264, Xelaev18021791m.g	GenBank, Xenbase_9.1	ipo7.L	importin 7 [Xenopus laevis], uncharacterized protein LOC431890 [Xenopus laevis], MGC52556 protein [Xenopus laevis], NA	O95373, O15397	IPO7, IPO8	RANBP7, RANBP8	importin	0.25370571594173214	0.7411440686616975	FALSE	FALSE	FALSE
ENOG411CZER	0	1	0	3	0	0.9374450100041284	0	0.8996275471501252	0.5	1.5	0.66287372356341	ENOG411CZER	148223249, Xelaev18000032m.g, Xelaev18041726m.g	GenBank, Xenbase_9.1	hsd17b10.L, hsd17b10.S	hydroxysteroid (17-beta) dehydrogenase 10 [Xenopus laevis], NA	Q99714	HSD17B10	ERAB HADH2 MRPP2 SCHAD SDR5C1 XH98G2	Hydroxysteroid (17-beta) dehydrogenase 10	0.25370571594173214	0.7411440686616975	FALSE	FALSE	FALSE
ENOG411CUH0	0	1	0	3	0	0.9374450100041284	0	0.8996275471501252	0.5	1.5	0.66287372356341	ENOG411CUH0	118763688, 124481818, 148237982, 54311422, Xelaev18028620m.g, Xelaev18039316m.g	GenBank, Xenbase_9.1	adck3.S, adck4.L	LOC495397 protein [Xenopus laevis], LOC100037137 protein [Xenopus laevis], aarF domain containing kinase 4 [Xenopus laevis], NA	Q8NI60, Q96D53	COQ8A, COQ8B	ADCK3 CABC1, ADCK4	AarF domain containing kinase	0.25370571594173214	0.7411440686616975	FALSE	FALSE	FALSE
ENOG411CXJC	0	1	0	3	0	0.9374450100041284	0	0.8996275471501252	0.5	1.5	0.66287372356341	ENOG411CXJC	147899649, 148237157	GenBank	NA	saccharopine dehydrogenase (putative) [Xenopus laevis]	Q8NBX0	SCCPDH	NA	Saccharopine dehydrogenase	0.25370571594173214	0.7411440686616975	FALSE	FALSE	FALSE
ENOG411D47Y	0	1	0	3	0	0.9374450100041284	0	0.8996275471501252	0.5	1.5	0.66287372356341	ENOG411D47Y	147906473	GenBank	NA	NADH dehydrogenase (ubiquinone) Fe-S protein 5, 15kDa (NADH-coenzyme Q reductase) [Xenopus laevis]	O43920	NDUFS5	NA	NADH dehydrogenase (Ubiquinone) Fe-S protein 5, 15kDa (NADH-coenzyme Q reductase)	0.25370571594173214	0.7411440686616975	FALSE	FALSE	FALSE
ENOG411CVYY	0	5	0	9	0	0.9344229082593021	0	0.6365931413163315	2.5	4.5	0.6607367749262076	ENOG411CVYY	147900486, Xelaev18023938m.g, Xelaev18021187m.g, Xelaev18017531m.g	GenBank, Xenbase_9.1	loc100492789-like.L, cand1.S, cand1.L	cullin-associated and neddylation-dissociated 1 [Xenopus laevis], NA	Q86VP6, O75155	CAND1, CAND2	KIAA0829 TIP120 TIP120A, KIAA0667 TIP120B	cullin-associated and neddylation-dissociated	0.25439056775641145	0.7411440686616975	FALSE	FALSE	FALSE
ENOG411D3MV	1	16	2	19	0.6653122764971168	0.26708767629319413	0.715023041285529	0.13409280078714833	8.5	10.5	0.6593063293960455	ENOG411D3MV	Xelaev18009819m.g, Xelaev18006288m.g	Xenbase_9.1	ndufa7-like.S, ndufa7.L	NA	O95182	NDUFA7	NA	NADH dehydrogenase (ubiquinone) 1 alpha subcomplex	0.25484953939946087	0.7411440686616975	FALSE	FALSE	FALSE
ENOG411D45X	0	5	1	5	1.0324492591630055	-0.13472677589397158	1.1300605405643729	-0.10037245284987478	2.5	3	0.6347856555431607	ENOG411D45X	148226432, Xelaev18047429m.g	GenBank, Xenbase_9.1	hspe1.S	heat shock 10kDa protein 1 (chaperonin 10) [Xenopus laevis], NA	P61604	HSPE1	NA	Heat shock 10kDa protein 1 (Chaperonin 10)	0.26278410999439505	0.7607917143820833	FALSE	FALSE	FALSE
ENOG411DFJY	0	3	0	6	0	0.8951175770740686	0	0.7069824692077293	1.5	3	0.6329437087083459	ENOG411DFJY	Xelaev18036528m.g, Xelaev18008638m.g, Xelaev18036527m.g, Xelaev18036484m.g, Xelaev18038039m.g, Xelaev18038036m.g, Xelaev18036478m.g, Xelaev18036482m.g, Xelaev18004212m.g, Xelaev18036483m.g	Xenbase_9.1	loc100488805.L, loc100489882.L, loc100488642.L, fcgbp.L, fcgbp.S, Xelaev18038036m.g, loc101735028.L, Xetrov90019630m.L, loc100495886.1.S, Xelaev18036483m.g	NA	NA	NA	NA	Fc fragment of IgG binding protein	0.2633852017042066	0.7607917143820833	FALSE	FALSE	FALSE
ENOG411CRDQ	2	2	2	4	0.11920377284128798	0.7307320887233787	0.1300605405643729	0.6365931413163315	2	3	0.6009954112860065	ENOG411CRDQ	148226152, 148235725	GenBank	NA	eukaryotic translation initiation factor 3 subunit G-B [Xenopus laevis], eukaryotic translation initiation factor 3 subunit G-A [Xenopus laevis]	O75821	EIF3G	EIF3S4	Component of the eukaryotic translation initiation factor 3 (eIF-3) complex (By similarity)	0.2739215213066577	0.7885619552767419	FALSE	FALSE	FALSE
ENOG411CV35	6	30	8	33	0.7463151591140066	0.04864092622508496	0.49263061994908136	0.03289407801358951	18	20.5	0.5621188386887834	ENOG411CV35	117167931, 148227113, 20805283, 68534356, 80477501, Xelaev18021846m.g, Xelaev18024502m.g, Xelaev18000304m.g	GenBank, Xenbase_9.1	pdhx.L, pdhx.S, dlat.S	LOC398314 protein [Xenopus laevis], pyruvate dehydrogenase complex, component X [Xenopus laevis], mitochondrial dihydrolipoamide acetyltransferase precursor [Xenopus laevis], NA	O00330, P10515	PDHX, DLAT	PDX1, DLTA	pyruvate dehydrogenase complex component X	0.2870175269209947	0.8152246282690522	FALSE	FALSE	FALSE
ENOG411D3UG	0	7	0	11	0	0.7840901467949389	0	0.48459004787128135	3.5	5.5	0.5544354598602568	ENOG411D3UG	147901530, 52139120, Xelaev18006332m.g	GenBank, Xenbase_9.1	loc100495756-like.L	hypothetical protein LOC494706 [Xenopus laevis], LOC494706 protein [Xenopus laevis], NA	NA	NA	NA	NA	0.2896404319363574	0.8152246282690522	FALSE	FALSE	FALSE
ENOG411CS93	0	4	0	7	0	0.7840662561055173	0	0.5776994522627631	2	3.5	0.5544185665917595	ENOG411CS93	148232020, Xelaev18042670m.g, Xelaev18002158m.g, Xelaev18040149m.g, Xelaev18040148m.g	GenBank, Xenbase_9.1	Xelaev18042670m.g, Xelaev18002158m.g, Xelaev18040149m.g, loc100491668.L	eukaryotic translation initiation factor 2 subunit 1 [Xenopus laevis], NA	P05198	EIF2S1	EIF2A	eukaryotic translation initiation factor 2, subunit 1 alpha	0.28964621123330025	0.8152246282690522	FALSE	FALSE	FALSE
ENOG411DD0Y	0	4	0	7	0	0.7840662561055173	0	0.5776994522627631	2	3.5	0.5544185665917595	ENOG411DD0Y	147905089, Xelaev18002853m.g, Xelaev18041775m.g	GenBank, Xenbase_9.1	hcfc1.L, hcfc1.S	uncharacterized protein LOC494675 [Xenopus laevis], NA	P51610	HCFC1	HCF1 HFC1	host cell factor C1	0.28964621123330025	0.8152246282690522	FALSE	FALSE	FALSE
ENOG411CVHZ	0	4	0	7	0	0.7840662561055173	0	0.5776994522627631	2	3.5	0.5544185665917595	ENOG411CVHZ	114107861, 147904390	GenBank	NA	MGC154458 protein [Xenopus laevis], sideroflexin 3 [Xenopus laevis]	Q9H9B4, Q9BWM7	SFXN1, SFXN3	NA	sideroflexin	0.28964621123330025	0.8152246282690522	FALSE	FALSE	FALSE
ENOG411CT9H	0	4	0	7	0	0.7840662561055173	0	0.5776994522627631	2	3.5	0.5544185665917595	ENOG411CT9H	148222918	GenBank	NA	NADH dehydrogenase ubiquinone flavoprotein 1 [Xenopus laevis]	P49821	NDUFV1	UQOR1	NADH dehydrogenase (ubiquinone) flavoprotein 1	0.28964621123330025	0.8152246282690522	FALSE	FALSE	FALSE
ENOG411CRKW	0	2	0	4	0	0.7307320887233787	0	0.6365931413163315	1	2	0.5167056151669109	ENOG411CRKW	12025476, 147905646, 148228344, 213626677, 27447665, 47937568, Xelaev18010553m.g, Xelaev18010552m.g, Xelaev18035073m.g, Xelaev18007708m.g, Xelaev18037256m.g	GenBank, Xenbase_9.1	Xelaev18010553m.g, arvcf.S, ctnnd1.L, arvcf.L, ctnnd1.S	p120 [Xenopus laevis], armadillo repeat gene deletes in velo-cardio-facial syndrome [Xenopus laevis], catenin delta-1 [Xenopus laevis], Arvcf protein [Xenopus laevis], p120 isoform 2 [Xenopus laevis], NA	O60716, O00192	CTNND1, ARVCF	KIAA0384, NA	Catenin (Cadherin-associated protein), delta 1	0.30268083784450195	0.8152246282690522	FALSE	FALSE	FALSE
ENOG411CRFV	0	2	0	4	0	0.7307320887233787	0	0.6365931413163315	1	2	0.5167056151669109	ENOG411CRFV	124481718, 147899434, 147900253, 148223545, 50415013, 54038415, Xelaev18015399m.g, Xelaev18002200m.g, Xelaev18003389m.g	GenBank, Xenbase_9.1	atp2a3.S, atp2a1.S, atp2a1.L	ATP2A2 protein [Xenopus laevis], ATPase, Ca++ transporting, cardiac muscle, slow twitch 2 [Xenopus laevis], ATPase, Ca++ transporting, ubiquitous [Xenopus laevis], uncharacterized protein LOC495046 [Xenopus laevis], LOC495046 protein [Xenopus laevis], NA	P16615, O14983, Q93084	ATP2A2, ATP2A1, ATP2A3	ATP2B, NA	ATPase CA transporting cardiac muscle	0.30268083784450195	0.8152246282690522	FALSE	FALSE	FALSE
ENOG411CVR3	0	2	0	4	0	0.7307320887233787	0	0.6365931413163315	1	2	0.5167056151669109	ENOG411CVR3	125858001, 147900724, 49118234, 67677951, Xelaev18034294m.g, Xelaev18036674m.g	GenBank, Xenbase_9.1	eif3a.L, eif3a.S	LOC443632 protein [Xenopus laevis], nucleolin [Xenopus laevis], NA	Q14152	EIF3A	EIF3S10 KIAA0139	Component of the eukaryotic translation initiation factor 3 (eIF-3) complex, which is required for several steps in the initiation of protein synthesis. The eIF-3 complex associates with the 40S ribosome and facilitates the recruitment of eIF-1, eIF-1A, eIF-2 GTP methionyl-tRNAi and eIF-5 to form the 43S preinitiation complex (43S PIC). The eIF-3 complex stimulates mRNA recruitment to the 43S PIC…	0.30268083784450195	0.8152246282690522	FALSE	FALSE	FALSE
ENOG411CWIW	0	2	0	4	0	0.7307320887233787	0	0.6365931413163315	1	2	0.5167056151669109	ENOG411CWIW	125858902, 148223643, 148228673, 148232513, Xelaev18047770m.g, Xelaev18045524m.g, Xelaev18025652m.g	GenBank, Xenbase_9.1	rpl3l.S, rpl3l.L, rpl3.S	LOC100037184 protein [Xenopus laevis], ribosomal protein L3-like [Xenopus laevis], ribosomal protein L3 [Xenopus laevis], MGC84749 protein [Xenopus laevis], NA	P39023, Q92901	RPL3, RPL3L	NA	ribosomal protein	0.30268083784450195	0.8152246282690522	FALSE	FALSE	FALSE
ENOG411CSF6	0	2	0	4	0	0.7307320887233787	0	0.6365931413163315	1	2	0.5167056151669109	ENOG411CSF6	116063406, 148230711, 148235853, 56540962	GenBank	NA	MGC154518 protein [Xenopus laevis], electron-transfer-flavoprotein, alpha polypeptide [Xenopus laevis], uncharacterized protein LOC735108 [Xenopus laevis], LOC496165 protein [Xenopus laevis]	P13804	ETFA	NA	Electron-transfer-flavoprotein, alpha polypeptide	0.30268083784450195	0.8152246282690522	FALSE	FALSE	FALSE
ENOG411CTAU	0	17	0	23	0	0.7022682367025715	0	0.31466504642896925	8.5	11.5	0.49657863238430777	ENOG411CTAU	133940, 1350988, 213626632, 65051	GenBank	NA	RecName: Full=40S ribosomal protein S3-A; AltName: Full=S1A, RecName: Full=40S ribosomal protein S3-B; AltName: Full=S1B, Rpls3-b protein [Xenopus laevis], ribosomal protein S1 [Xenopus laevis]	P23396	RPS3	NA	Ribosomal protein S3	0.30974311216604566	0.8152246282690522	FALSE	FALSE	FALSE
ENOG411CQFQ	4	20	6	21	0.8062154412176157	-0.11324359083389104	0.6154873677346148	-0.03325825699133747	12	13.5	0.4900050945777213	ENOG411CQFQ	147903669, 147903679, 147906867, 308818147, Xelaev18011119m.g, Xelaev18009640m.g, Xelaev18008475m.g	GenBank, Xenbase_9.1	eef2.2.S, eef2.1.S, eef2.2.L	uncharacterized protein LOC398780 [Xenopus laevis], eukaryotic translation elongation factor 2, gene 2 [Xenopus laevis], eukaryotic translation elongation factor 2, gene 1 [Xenopus laevis], uncharacterized protein LOC100505433 [Xenopus laevis], NA	P13639	EEF2	EF2	Eukaryotic translation elongation factor 2	0.3120651468950202	0.8152246282690522	FALSE	FALSE	FALSE
ENOG411CY1M	1	3	1	5	0.08422900289364679	0.6027843549209267	0.1300605405643729	0.48459004787128135	2	3	0.48579180407642486	ENOG411CY1M	148224857, Xelaev18000424m.g, Xelaev18038083m.g	GenBank, Xenbase_9.1	Xelaev18000424m.g, Xelaev18038083m.g	ribosomal protein L10 [Xenopus laevis], NA	P27635, Q96L21	RPL10, RPL10L	DXS648E QM, NA	ribosomal protein	0.3135573929269556	0.8152246282690522	FALSE	FALSE	FALSE
ENOG411CR1F	0	6	0	9	0	0.6275771124353471	0	0.4142007199798836	3	4.5	0.4437640319205063	ENOG411CR1F	148222563, 148235681, Xelaev18025912m.g, Xelaev18024004m.g, Xelaev18020889m.g	GenBank, Xenbase_9.1	copg1.S, copg1.L, copg2.S	coatomer subunit gamma-2 [Xenopus laevis], coatomer protein complex, subunit gamma [Xenopus laevis], NA	Q9Y678, Q9UBF2	COPG1, COPG2	COPG, NA	The coatomer is a cytosolic protein complex that binds to dilysine motifs and reversibly associates with Golgi non- clathrin-coated vesicles, which further mediate biosynthetic protein transport from the ER, via the Golgi up to the trans Golgi network. Coatomer complex is required for budding from Golgi membranes, and is essential for the retrograde Golgi-to-ER transport of dilysine-tagged protei…	0.32860659775033646	0.8152246282690522	FALSE	FALSE	FALSE
ENOG411CX3N	0	10	1	9	1.0324492591630055	-0.42061819653615073	1.1300605405643729	-0.23787597659980947	5	5	0.4326298933240202	ENOG411CX3N	148228797, Xelaev18044371m.g, Xelaev18046933m.g	GenBank, Xenbase_9.1	pdia5.L, pdia5.S	MGC84594 protein precursor [Xenopus laevis], NA	Q14554	PDIA5	PDIR	protein disulfide isomerase family A, member 5	0.33264183437064226	0.8152246282690522	FALSE	FALSE	FALSE
ENOG411CTDA	0	3	0	5	0	0.6027843549209267	0	0.48459004787128135	1.5	2.5	0.4262329049577459	ENOG411CTDA	171847166, 315192413, 315192415, 315192419, 315192427, 315192431, Xelaev18003710m.g	GenBank, Xenbase_9.1	mogs.L	LOC100158418 protein [Xenopus laevis], Mogs [Xenopus laevis], NA	Q13724	MOGS	GCS1	mannosyl-oligosaccharide glucosidase	0.3349690713653387	0.8152246282690522	FALSE	FALSE	FALSE
ENOG411D0HE	1	1	1	2	0.08422900289364679	0.5166149040537386	0.1300605405643729	0.48459004787128135	1	1.5	0.4248608010371151	ENOG411D0HE	148234180, Xelaev18044306m.g, Xelaev18046892m.g	GenBank, Xenbase_9.1	rpl13a.L, rpl13a.S	ribosomal protein L13a [Xenopus laevis], NA	P40429, Q6NVV1	RPL13A, RPL13AP3	NA	ribosomal protein L13a	0.33546907576105983	0.8152246282690522	FALSE	FALSE	FALSE
ENOG411CQSW	1	2	2	2	0.6653122764971168	-0.08517877068950216	0.715023041285529	-0.10037245284987478	1.5	2	0.4102163359500896	ENOG411CQSW	147906797, Xelaev18033989m.g	GenBank, Xenbase_9.1	wdyhv1.S	protein N-terminal glutamine amidohydrolase [Xenopus laevis], NA	Q96HA8	WDYHV1	C8orf32 NTAQ1	WDYHV motif containing 1	0.3408236292324154	0.8152246282690522	FALSE	FALSE	FALSE
ENOG411CVPF	0	5	1	4	1.0324492591630055	-0.4687799360862055	1.1300605405643729	-0.36340685868366845	2.5	2.5	0.3985744006944361	ENOG411CVPF	148231191, 148231875, 5326785, Xelaev18038427m.g, Xelaev18013331m.g, Xelaev18042402m.g	GenBank, Xenbase_9.1	Xelaev18038427m.g, Xelaev18013331m.g, Xelaev18042402m.g	guanine nucleotide binding protein (G protein), beta polypeptide 2-like 1 [Xenopus laevis], uncharacterized protein LOC446289 [Xenopus laevis], activated protein kinase C receptor [Xenopus laevis], NA	P63244	RACK1	GNB2L1	Guanine nucleotide binding protein (G protein), beta polypeptide 2-like 1	0.3451034135860419	0.8152246282690522	FALSE	FALSE	FALSE
ENOG411CSWN	4	10	5	11	0.5043718823125574	0.0280136050010526	0.3930949463981667	0.02515842923398444	7	8	0.3764533882847583	ENOG411CSWN	148226545, Xelaev18028316m.g, Xelaev18030253m.g	GenBank, Xenbase_9.1	hadhb.L, hadhb.S	hydroxyacyl-CoA dehydrogenase/3-ketoacyl-CoA thiolase/enoyl-CoA hydratase (trifunctional protein), beta subunit [Xenopus laevis], NA	P55084	HADHB	NA	hydroxyacyl-CoA dehydrogenase 3-ketoacyl-CoA thiolase enoyl-CoA hydratase (trifunctional protein), beta subunit	0.3532899309318053	0.8152246282690522	FALSE	FALSE	FALSE
ENOG411CZ04	1	5	1	7	0.08422900289364679	0.4430856421812228	0.1300605405643729	0.314665046428969	3	4	0.37286776135141775	ENOG411CZ04	147905764, 148234849	GenBank	NA	staphylococcal nuclease and tudor domain containing protein 1 [Xenopus laevis]	Q7KZF4	SND1	TDRD11	staphylococcal nuclease and tudor domain containing 1	0.354623433604221	0.8152246282690522	FALSE	FALSE	FALSE
ENOG411CQQS	0	1	0	2	0	0.5166149040537386	0	0.48459004787128135	0.5	1	0.36530190191843614	ENOG411CQQS	147903272, 147905534, 158931156, 28175306, 32766602, Xelaev18027940m.g, Xelaev18029975m.g	GenBank, Xenbase_9.1	Xelaev18027940m.g, Xelaev18029975m.g	serotransferrin-B precursor [Xenopus laevis], serotransferrin-A precursor [Xenopus laevis], RecName: Full=Serotransferrin-A; Flags: Precursor, Tf-b protein [Xenopus laevis], MGC64251 protein [Xenopus laevis], NA	P02787, P02788	TF, LTF	NA, GIG12 LF	Transferrins are iron binding transport proteins which can bind two Fe(3 ) ions in association with the binding of an anion, usually bicarbonate	0.35744302942130046	0.8152246282690522	FALSE	FALSE	FALSE
ENOG411D2B1	0	1	0	2	0	0.5166149040537386	0	0.48459004787128135	0.5	1	0.36530190191843614	ENOG411D2B1	148223903, 148230625, Xelaev18038172m.g, Xelaev18041426m.g, Xelaev18041428m.g	GenBank, Xenbase_9.1	glipr2.L, Xelaev18041426m.g, glipr2.S	GLI pathogenesis-related 2 [Xenopus laevis], MGC80621 protein [Xenopus laevis], NA	NA	NA	NA	SCP	0.35744302942130046	0.8152246282690522	FALSE	FALSE	FALSE
ENOG411CPEW	0	1	0	2	0	0.5166149040537386	0	0.48459004787128135	0.5	1	0.36530190191843614	ENOG411CPEW	114108131, 148225841	GenBank	NA	MGC154791 protein [Xenopus laevis], uncharacterized protein LOC432270 [Xenopus laevis]	Q02978	SLC25A11	SLC20A4	solute carrier family 25 (mitochondrial carrier)	0.35744302942130046	0.8152246282690522	FALSE	FALSE	FALSE
ENOG411CZRH	0	1	0	2	0	0.5166149040537386	0	0.48459004787128135	0.5	1	0.36530190191843614	ENOG411CZRH	148227728, Xelaev18008754m.g	GenBank, Xenbase_9.1	dctn1.S	dynactin subunit 1 [Xenopus laevis], NA	Q14203	DCTN1	NA	Dynactin 1	0.35744302942130046	0.8152246282690522	FALSE	FALSE	FALSE
ENOG411CTK7	0	1	0	2	0	0.5166149040537386	0	0.48459004787128135	0.5	1	0.36530190191843614	ENOG411CTK7	Xelaev18015152m.g, Xelaev18012461m.g	Xenbase_9.1	sfpq.S, sfpq.L	NA	P23246	SFPQ	PSF	splicing factor proline glutamine-rich	0.35744302942130046	0.8152246282690522	FALSE	FALSE	FALSE
ENOG411CU1U	0	1	0	2	0	0.5166149040537386	0	0.48459004787128135	0.5	1	0.36530190191843614	ENOG411CU1U	148225835, Xelaev18020755m.g	GenBank, Xenbase_9.1	scamp2.S	secretory carrier membrane protein 2 [Xenopus laevis], NA	O15127	SCAMP2	NA	Secretory carrier membrane protein 2	0.35744302942130046	0.8152246282690522	FALSE	FALSE	FALSE
ENOG411CQM2	0	1	0	2	0	0.5166149040537386	0	0.48459004787128135	0.5	1	0.36530190191843614	ENOG411CQM2	148227388, Xelaev18026247m.g, Xelaev18008549m.g, Xelaev18011176m.g	GenBank, Xenbase_9.1	marc1-like.L, loc100487963.L, loc100487963.S	MOSC domain-containing protein 1, mitochondrial precursor [Xenopus laevis], NA	Q5VT66, Q969Z3, A0A494C1P3	MARC1, MARC2, NA	MOSC1, MOSC2, NA	Mitochondrial amidoxime reducing component	0.35744302942130046	0.8152246282690522	FALSE	FALSE	FALSE
ENOG411CVNI	0	1	0	2	0	0.5166149040537386	0	0.48459004787128135	0.5	1	0.36530190191843614	ENOG411CVNI	148225344, Xelaev18032019m.g	GenBank, Xenbase_9.1	mrpl15.L	39S ribosomal protein L15, mitochondrial precursor [Xenopus laevis], NA	Q9P015	MRPL15	NA	mitochondrial ribosomal protein L15	0.35744302942130046	0.8152246282690522	FALSE	FALSE	FALSE
ENOG411D1CM	0	1	0	2	0	0.5166149040537386	0	0.48459004787128135	0.5	1	0.36530190191843614	ENOG411D1CM	148229557, Xelaev18006654m.g	GenBank, Xenbase_9.1	srp72.L	signal recognition particle 72kDa [Xenopus laevis], NA	O76094	SRP72	NA	Signal-recognition-particle assembly has a crucial role in targeting secretory proteins to the rough endoplasmic reticulum membrane (By similarity)	0.35744302942130046	0.8152246282690522	FALSE	FALSE	FALSE
ENOG411CXV0	0	1	0	2	0	0.5166149040537386	0	0.48459004787128135	0.5	1	0.36530190191843614	ENOG411CXV0	147906713, 148237217, Xelaev18017116m.g	GenBank, Xenbase_9.1	hnrnph1.L	heterogeneous nuclear ribonucleoprotein H1 (H) [Xenopus laevis], NA	P31943, P55795	HNRNPH1, HNRNPH2	HNRPH HNRPH1, FTP3 HNRPH2	heterogeneous nuclear ribonucleoprotein	0.35744302942130046	0.8152246282690522	FALSE	FALSE	FALSE
ENOG411CYUD	0	1	0	2	0	0.5166149040537386	0	0.48459004787128135	0.5	1	0.36530190191843614	ENOG411CYUD	148223539, 148223736	GenBank	NA	coatomer protein complex, subunit beta 1 [Xenopus laevis], uncharacterized protein LOC735158 [Xenopus laevis]	P53618	COPB1	COPB	The coatomer is a cytosolic protein complex that binds to dilysine motifs and reversibly associates with Golgi non- clathrin-coated vesicles, which further mediate biosynthetic protein transport from the ER, via the Golgi up to the trans Golgi network. Coatomer complex is required for budding from Golgi membranes, and is essential for the retrograde Golgi-to-ER transport of dilysine-tagged protei…	0.35744302942130046	0.8152246282690522	FALSE	FALSE	FALSE
ENOG411CR4W	0	1	0	2	0	0.5166149040537386	0	0.48459004787128135	0.5	1	0.36530190191843614	ENOG411CR4W	148235835, Xelaev18021054m.g	GenBank, Xenbase_9.1	fam3c.S	family with sequence similarity 3, member C [Xenopus laevis], NA	Q92520	FAM3C	ILEI	Family with sequence similarity 3, member C	0.35744302942130046	0.8152246282690522	FALSE	FALSE	FALSE
ENOG411CUET	0	1	0	2	0	0.5166149040537386	0	0.48459004787128135	0.5	1	0.36530190191843614	ENOG411CUET	1174160, 120577616, Xelaev18011047m.g, Xelaev18008398m.g	GenBank, Xenbase_9.1	lman1.S, lman1.L	p58 [Xenopus laevis], Lman1-a protein [Xenopus laevis], NA	P49257	LMAN1	ERGIC53 F5F8D	lectin, mannose-binding 1	0.35744302942130046	0.8152246282690522	FALSE	FALSE	FALSE
ENOG411D3S8	0	1	0	2	0	0.5166149040537386	0	0.48459004787128135	0.5	1	0.36530190191843614	ENOG411D3S8	148228665, 148230733, 213625115, Xelaev18044940m.g, Xelaev18047361m.g	GenBank, Xenbase_9.1	sumo1.L, sumo1.S	small ubiquitin-related modifier 1-A precursor [Xenopus laevis], small ubiquitin-related modifier 1-B precursor [Xenopus laevis], MGC85025 protein [Xenopus laevis], NA	P63165, G2XKQ0	SUMO1, SUMO1P1	SMT3C SMT3H3 UBL1, SUMO5 UBL2 UBL6	SMT3 suppressor of mif two 3 homolog 1 (S. cerevisiae)	0.35744302942130046	0.8152246282690522	FALSE	FALSE	FALSE
ENOG411CPV1	0	1	0	2	0	0.5166149040537386	0	0.48459004787128135	0.5	1	0.36530190191843614	ENOG411CPV1	147901061, 148230021, Xelaev18019057m.g	GenBank, Xenbase_9.1	farsa.L	phenylalanyl-tRNA synthetase alpha chain B [Xenopus laevis], phenylalanyl-tRNA synthetase alpha chain A [Xenopus laevis], NA	Q9Y285	FARSA	FARS FARSL FARSLA	Phenylalanyl-tRNA synthetase alpha subunit	0.35744302942130046	0.8152246282690522	FALSE	FALSE	FALSE
ENOG411CYDE	0	1	0	2	0	0.5166149040537386	0	0.48459004787128135	0.5	1	0.36530190191843614	ENOG411CYDE	Xelaev18025761m.g, Xelaev18023810m.g	Xenbase_9.1	rnf123.S, rnf123.L	NA	Q5XPI4	RNF123	KPC1	RING finger protein 123	0.35744302942130046	0.8152246282690522	FALSE	FALSE	FALSE
ENOG411CTC7	0	1	0	2	0	0.5166149040537386	0	0.48459004787128135	0.5	1	0.36530190191843614	ENOG411CTC7	124481772, 134912, 1890239, 238963, 238964, 51859569, Xelaev18019791m.g	GenBank, Xenbase_9.1	ssbp1.S	Ssbp1-b protein [Xenopus laevis], RecName: Full=Single-stranded DNA-binding protein 1-A, mitochondrial; AltName: Full=Single-stranded DNA-binding protein 1, mitochondrial; Short=MtSSB-1; Short=XlSSB1; AltName: Full=Single-stranded DNA-binding protein S, mitochondrial; Short=MtSSBs; Short=xl-mtssb; Flags: Precursor, mitochondrial single strand DNA binding protein [Xenopus laevis], single-stranded …	Q04837	SSBP1	SSBP	single-stranded DNA binding protein 1	0.35744302942130046	0.8152246282690522	FALSE	FALSE	FALSE
ENOG411CSR9	0	1	0	2	0	0.5166149040537386	0	0.48459004787128135	0.5	1	0.36530190191843614	ENOG411CSR9	147900221, 148226660	GenBank	NA	40S ribosomal protein S6 [Xenopus laevis], ribosomal protein S6 [Xenopus laevis]	P62753	RPS6	NA	40S ribosomal protein S6	0.35744302942130046	0.8152246282690522	FALSE	FALSE	FALSE
ENOG411CUSP	0	1	0	2	0	0.5166149040537386	0	0.48459004787128135	0.5	1	0.36530190191843614	ENOG411CUSP	120538062, 133737016, Xelaev18034866m.g, Xelaev18037118m.g	GenBank, Xenbase_9.1	ndufb8.L, ndufb8.S	LOC100036987 protein [Xenopus laevis], LOC100049132 protein [Xenopus laevis], NA	O95169	NDUFB8	NA	NADH dehydrogenase (ubiquinone) 1 beta subcomplex	0.35744302942130046	0.8152246282690522	FALSE	FALSE	FALSE
ENOG411CQM7	0	1	0	2	0	0.5166149040537386	0	0.48459004787128135	0.5	1	0.36530190191843614	ENOG411CQM7	147902353, 15809658, 27924238, 77748491, Xelaev18006562m.g, Xelaev18006554m.g, Xelaev18001206m.g, Xelaev18010864m.g	GenBank, Xenbase_9.1	Xelaev18006562m.g, Xelaev18006554m.g, Xelaev18001206m.g, smn2.S	survival of motor neuron 2, centromeric [Xenopus laevis], survival motor neuron [Xenopus laevis], LOC398438 protein [Xenopus laevis], LOC733398 protein [Xenopus laevis], NA	Q16637	SMN1; SMN2	SMN SMNT; SMNC	Survival motor neuron	0.35744302942130046	0.8152246282690522	FALSE	FALSE	FALSE
ENOG411CSC3	0	1	0	2	0	0.5166149040537386	0	0.48459004787128135	0.5	1	0.36530190191843614	ENOG411CSC3	147904653, 148230456, Xelaev18020742m.g, Xelaev18007966m.g, Xelaev18010746m.g, Xelaev18018086m.g	GenBank, Xenbase_9.1	snx1.S, snx2.L, snx2.S, snx1.L	sorting nexin 1 [Xenopus laevis], sorting nexin 2 [Xenopus laevis], NA	Q13596, O60749	SNX1, SNX2	NA	sorting nexin	0.35744302942130046	0.8152246282690522	FALSE	FALSE	FALSE
ENOG411CUN2	0	1	0	2	0	0.5166149040537386	0	0.48459004787128135	0.5	1	0.36530190191843614	ENOG411CUN2	Xelaev18024996m.g, Xelaev18022833m.g	Xenbase_9.1	cnot1.S, cnot1.L	NA	A5YKK6	CNOT1	CDC39 KIAA1007 NOT1	CCR4-NOT transcription complex subunit 1	0.35744302942130046	0.8152246282690522	FALSE	FALSE	FALSE
ENOG411CVEQ	0	1	0	2	0	0.5166149040537386	0	0.48459004787128135	0.5	1	0.36530190191843614	ENOG411CVEQ	148226988, 148228813, Xelaev18028804m.g, Xelaev18026077m.g	GenBank, Xenbase_9.1	napb.S, napb.L	N-ethylmaleimide-sensitive factor attachment protein, alpha [Xenopus laevis], N-ethylmaleimide-sensitive factor attachment protein, beta [Xenopus laevis], NA	Q9H115, P54920	NAPB, NAPA	SNAPB, SNAPA	N-ethylmaleimide-sensitive factor attachment protein	0.35744302942130046	0.8152246282690522	FALSE	FALSE	FALSE
Xelaev18037980m.g	0	1	0	2	0	0.5166149040537386	0	0.48459004787128135	0.5	1	0.36530190191843614	Xelaev18037980m.g	NA	Xenbase_9.1	ubr4.S	NA	NA	NA	NA	NA	0.35744302942130046	0.8152246282690522	FALSE	FALSE	FALSE
ENOG411D48M	0	1	0	2	0	0.5166149040537386	0	0.48459004787128135	0.5	1	0.36530190191843614	ENOG411D48M	148237400	GenBank	NA	translocase of outer mitochondrial membrane 22 homolog [Xenopus laevis]	Q9NS69	TOMM22	TOM22	translocase of outer mitochondrial membrane 22 homolog (yeast)	0.35744302942130046	0.8152246282690522	FALSE	FALSE	FALSE
ENOG411CY2J	0	1	0	2	0	0.5166149040537386	0	0.48459004787128135	0.5	1	0.36530190191843614	ENOG411CY2J	12082247, 148229513, 16209558, 28804566, 313661062, Xelaev18012056m.g, Xelaev18030116m.g, Xelaev18028098m.g	GenBank, Xenbase_9.1	pum1.L, pum2.S, pum2.L	pumilio [Xenopus laevis], pumilio homolog 1 [Xenopus laevis], pumilio-like protein 1 [Xenopus laevis], Pumilio [Xenopus laevis], Pumilio2 [Xenopus laevis], NA	Q14671, Q8TB72	PUM1, PUM2	KIAA0099 PUMH1, KIAA0235 PUMH2	pumilio homolog	0.35744302942130046	0.8152246282690522	FALSE	FALSE	FALSE
ENOG411CWR8	0	1	0	2	0	0.5166149040537386	0	0.48459004787128135	0.5	1	0.36530190191843614	ENOG411CWR8	148225919, 148230328	GenBank	NA	FK506 binding protein 2, 13kDa precursor [Xenopus laevis], MGC80429 protein precursor [Xenopus laevis]	P26885	FKBP2	FKBP13	FK506 binding protein 2, 13kDa	0.35744302942130046	0.8152246282690522	FALSE	FALSE	FALSE
ENOG411D0VM	0	1	0	2	0	0.5166149040537386	0	0.48459004787128135	0.5	1	0.36530190191843614	ENOG411D0VM	163916521, Xelaev18024911m.g	GenBank, Xenbase_9.1	pdf.S	LOC100137680 protein [Xenopus laevis], NA	Q9HBH1	PDF	PDF1A	peptide deformylase, mitochondrial	0.35744302942130046	0.8152246282690522	FALSE	FALSE	FALSE
ENOG411CV02	0	1	0	2	0	0.5166149040537386	0	0.48459004787128135	0.5	1	0.36530190191843614	ENOG411CV02	120577498, 148222035, Xelaev18009936m.g	GenBank, Xenbase_9.1	bsg.S	LOC100037021 protein [Xenopus laevis], basigin (Ok blood group) precursor [Xenopus laevis], NA	P35613	BSG	NA	basigin (Ok blood group)	0.35744302942130046	0.8152246282690522	FALSE	FALSE	FALSE
ENOG411CSSA	0	1	0	2	0	0.5166149040537386	0	0.48459004787128135	0.5	1	0.36530190191843614	ENOG411CSSA	161611661	GenBank	NA	Echdc3 protein [Xenopus laevis]	Q96DC8	ECHDC3	NA	Enoyl CoA hydratase domain containing 3	0.35744302942130046	0.8152246282690522	FALSE	FALSE	FALSE
ENOG411CY0Z	0	1	0	2	0	0.5166149040537386	0	0.48459004787128135	0.5	1	0.36530190191843614	ENOG411CY0Z	113953, 113971, 214533, 27881813, 7248186	GenBank	NA	RecName: Full=Annexin A2-B; AltName: Full=Annexin II type II; AltName: Full=Annexin-2-B; AltName: Full=Calpactin I heavy chain; AltName: Full=Calpactin-1 heavy chain; AltName: Full=Lipocortin II, RecName: Full=Annexin A2-A; AltName: Full=Annexin II type I; AltName: Full=Annexin-2-A; AltName: Full=Calpactin I heavy chain; AltName: Full=Calpactin-1 heavy chain; AltName: Full=Lipocortin II, annexin …	P07355, A6NMY6	ANXA2, ANXA2P2	ANX2 ANX2L4 CAL1H LPC2D, ANX2L2 ANX2P2 LPC2B	Annexin A2	0.35744302942130046	0.8152246282690522	FALSE	FALSE	FALSE
ENOG411DFJ8	0	1	0	2	0	0.5166149040537386	0	0.48459004787128135	0.5	1	0.36530190191843614	ENOG411DFJ8	148226222, 148234427, Xelaev18032231m.g, Xelaev18033897m.g	GenBank, Xenbase_9.1	matn2.L, matn2.S	hypothetical protein LOC734900 [Xenopus laevis], matrilin 2 precursor [Xenopus laevis], NA	NA	NA	NA	Matrilin 2	0.35744302942130046	0.8152246282690522	FALSE	FALSE	FALSE
ENOG411CX58	0	1	0	2	0	0.5166149040537386	0	0.48459004787128135	0.5	1	0.36530190191843614	ENOG411CX58	148225041, Xelaev18010314m.g	GenBank, Xenbase_9.1	apex1.S	APEX nuclease (multifunctional DNA repair enzyme) 1 [Xenopus laevis], NA	P27695	APEX1	APE APE1 APEX APX HAP1 REF1	Multifunctional protein that plays a central role in the cellular response to oxidative stress. The two major activities of APEX1 in DNA repair and redox regulation of transcriptional factors. Functions as a apurinic apyrimidinic (AP) endodeoxyribonuclease in the DNA base excision repair (BER) pathway of DNA lesions induced by oxidative and alkylating agents. Initiates repair of AP sites in DNA b…	0.35744302942130046	0.8152246282690522	FALSE	FALSE	FALSE
ENOG411CPNT	0	1	0	2	0	0.5166149040537386	0	0.48459004787128135	0.5	1	0.36530190191843614	ENOG411CPNT	16215602, 27924240, Xelaev18034300m.g, Xelaev18036677m.g	GenBank, Xenbase_9.1	tial1.L, tial1.S	TIAR protein [Xenopus laevis], Tia1 protein [Xenopus laevis], NA	Q01085	TIAL1	NA	Tia1 cytotoxic granule-associated RNA binding protein-like 1	0.35744302942130046	0.8152246282690522	FALSE	FALSE	FALSE
ENOG411CVMJ	0	1	0	2	0	0.5166149040537386	0	0.48459004787128135	0.5	1	0.36530190191843614	ENOG411CVMJ	138999374, 148222968, 148228859, Xelaev18033191m.g	GenBank, Xenbase_9.1	cdv3.S	heat-stable protein p37 [Xenopus laevis], protein CDV3 homolog B [Xenopus laevis], protein CDV3 homolog A [Xenopus laevis], NA	Q9UKY7	CDV3	H41	CDV3 homolog (mouse)	0.35744302942130046	0.8152246282690522	FALSE	FALSE	FALSE
ENOG411D3K8	0	1	0	2	0	0.5166149040537386	0	0.48459004787128135	0.5	1	0.36530190191843614	ENOG411D3K8	291290931, Xelaev18039054m.g	GenBank, Xenbase_9.1	snrpd2.L	small nuclear ribonucleoprotein D2 polypeptide 16.5kDa [Xenopus laevis], NA	P62316	SNRPD2	SNRPD1	small nuclear ribonucleoprotein D2 polypeptide 16.5kDa	0.35744302942130046	0.8152246282690522	FALSE	FALSE	FALSE
ENOG411CTIG	0	1	0	2	0	0.5166149040537386	0	0.48459004787128135	0.5	1	0.36530190191843614	ENOG411CTIG	Xelaev18038922m.g, Xelaev18042260m.g	Xenbase_9.1	hdx.L, hdx.S	NA	Q7Z353	HDX	CXorf43	Highly divergent homeobox	0.35744302942130046	0.8152246282690522	FALSE	FALSE	FALSE
ENOG411CRGX	0	1	0	2	0	0.5166149040537386	0	0.48459004787128135	0.5	1	0.36530190191843614	ENOG411CRGX	114107914, 148232493, Xelaev18006549m.g	GenBank, Xenbase_9.1	clta.L	Clta protein [Xenopus laevis], clathrin, light chain A [Xenopus laevis], NA	P09496	CLTA	NA	clathrin light chain A	0.35744302942130046	0.8152246282690522	FALSE	FALSE	FALSE
ENOG411CS2A	0	1	0	2	0	0.5166149040537386	0	0.48459004787128135	0.5	1	0.36530190191843614	ENOG411CS2A	148223025, Xelaev18005871m.g, Xelaev18009539m.g	GenBank, Xenbase_9.1	anxa3.L, anxa3.S	annexin A3 [Xenopus laevis], NA	P12429	ANXA3	ANX3	Annexin A3	0.35744302942130046	0.8152246282690522	FALSE	FALSE	FALSE
ENOG411CTA6	0	1	0	2	0	0.5166149040537386	0	0.48459004787128135	0.5	1	0.36530190191843614	ENOG411CTA6	114108077, 120538281, 148227050, Xelaev18007620m.g, Xelaev18007618m.g, Xelaev18007621m.g	GenBank, Xenbase_9.1	Xelaev18007620m.g, Xelaev18007618m.g, gstt1-like.2.L	MGC154434 protein [Xenopus laevis], LOC100036918 protein [Xenopus laevis], glutathione S-transferase theta 1 [Xenopus laevis], NA	NA	NA	NA	Glutathione S-transferase	0.35744302942130046	0.8152246282690522	FALSE	FALSE	FALSE
ENOG411CRQ5	0	4	0	6	0	0.5122645051968542	0	0.3850543743203671	2	3	0.36222570538586696	ENOG411CRQ5	148231424, Xelaev18013403m.g, Xelaev18015903m.g	GenBank, Xenbase_9.1	naca.2.L, naca.2.S	nascent polypeptide-associated complex subunit alpha [Xenopus laevis], NA	Q9H009, Q9BZK3, E9PAV3	NACA2, NACA4P, NACA	NACAL, NACAP1, NA	Nascent polypeptide-associated complex alpha subunit	0.35859168593916546	0.8152246282690522	FALSE	FALSE	FALSE
ENOG411CWA4	0	4	0	6	0	0.5122645051968542	0	0.3850543743203671	2	3	0.36222570538586696	ENOG411CWA4	152012986, Xelaev18010449m.g, Xelaev18007546m.g	GenBank, Xenbase_9.1	gcn1.S, gcn1.L	LOC100125671 protein [Xenopus laevis], NA	Q92616	GCN1	GCN1L1 KIAA0219	GCN1 general control of amino-acid synthesis 1-like 1 (Yeast)	0.35859168593916546	0.8152246282690522	FALSE	FALSE	FALSE
ENOG411CTVQ	0	4	0	6	0	0.5122645051968542	0	0.3850543743203671	2	3	0.36222570538586696	ENOG411CTVQ	1079323, 116284353, 148238082, 50604137, Xelaev18046105m.g	GenBank, Xenbase_9.1	psmc5.S	XSUG1 protein - African clawed frog, MGC80185 protein [Xenopus laevis], XSUG1 protein [Xenopus laevis], Unknown (protein for MGC:79055) [Xenopus laevis], NA	P62195	PSMC5	SUG1	Proteasome (Prosome, macropain) 26S subunit, ATPase, 5	0.35859168593916546	0.8152246282690522	FALSE	FALSE	FALSE
ENOG411CTSE	0	4	0	6	0	0.5122645051968542	0	0.3850543743203671	2	3	0.36222570538586696	ENOG411CTSE	147900863, Xelaev18036446m.g, Xelaev18038011m.g	GenBank, Xenbase_9.1	ddost.L, ddost.S	dolichyl-diphosphooligosaccharide--protein glycosyltransferase 48 kDa subunit precursor [Xenopus laevis], NA	P39656	DDOST	KIAA0115 OST48	dolichyl-diphosphooligosaccharide--protein glycosyltransferase	0.35859168593916546	0.8152246282690522	FALSE	FALSE	FALSE
ENOG411D0JJ	0	4	0	6	0	0.5122645051968542	0	0.3850543743203671	2	3	0.36222570538586696	ENOG411D0JJ	148225598, Xelaev18042567m.g, Xelaev18039379m.g	GenBank, Xenbase_9.1	eif3k.S, eif3k.L	eukaryotic translation initiation factor 3 subunit K [Xenopus laevis], NA	Q9UBQ5	EIF3K	EIF3S12	Component of the eukaryotic translation initiation factor 3 (eIF-3) complex, which is required for several steps in the initiation of protein synthesis. The eIF-3 complex associates with the 40S ribosome and facilitates the recruitment of eIF-1, eIF-1A, eIF-2 GTP methionyl-tRNAi and eIF-5 to form the 43S preinitiation complex (43S PIC). The eIF-3 complex stimulates mRNA recruitment to the 43S PIC…	0.35859168593916546	0.8152246282690522	FALSE	FALSE	FALSE
ENOG411CUAI	1	8	2	8	0.6653122764971168	-0.1704773006495976	0.715023041285529	-0.10037245284987478	4.5	5	0.34990116699006224	ENOG411CUAI	13540314, 148223119, 148227542, 148227710, Xelaev18043239m.g, Xelaev18046000m.g	GenBank, Xenbase_9.1	pabpc1l.L, pabpc1l.S	embryonic poly(A) binding protein [Xenopus laevis], uncharacterized protein LOC495336 [Xenopus laevis], embryonic polyadenylate-binding protein A [Xenopus laevis], embryonic polyadenylate-binding protein B [Xenopus laevis], NA	Q4VXU2	PABPC1L	C20orf119	poly(A) binding protein, cytoplasmic 1-like	0.36320643559869736	0.8152246282690522	FALSE	FALSE	FALSE
ENOG411CRQM	0	3	1	2	1.0324492591630055	-0.5525963577748395	1.1300605405643729	-0.5154099521287187	1.5	1.5	0.3393072405436118	ENOG411CRQM	147906378, 148236420, Xelaev18045940m.g	GenBank, Xenbase_9.1	rpl19.S	ribosomal protein L19 [Xenopus laevis], 60S ribosomal protein L19 [Xenopus laevis], NA	P84098	RPL19	NA	ribosomal protein L19	0.36718914434509153	0.8152246282690522	FALSE	FALSE	FALSE
ENOG411CVID	1	0	0	2	-0.9133743785268378	1.385815745449537	-0.8699394594356271	1.4845900478712815	0.5	1	0.33406649426408247	ENOG411CVID	148224361	GenBank	NA	translocase of inner mitochondrial membrane 44 [Xenopus laevis]	O43615	TIMM44	MIMT44 TIM44	Translocase of inner mitochondrial membrane 44 homolog (Yeast)	0.3691646913741447	0.8152246282690522	FALSE	FALSE	FALSE
ENOG411CQT7	1	6	1	8	0.08422900289364679	0.38748734130500784	0.1300605405643729	0.2621976265348337	3.5	4.5	0.3335538257793962	ENOG411CQT7	148233902, Xelaev18026709m.g	GenBank, Xenbase_9.1	mthfd1l.L	methylenetetrahydrofolate dehydrogenase (NADP+ dependent) 1, methenyltetrahydrofolate cyclohydrolase, formyltetrahydrofolate synthetase [Xenopus laevis], NA	P11586, Q6UB35	MTHFD1, MTHFD1L	MTHFC MTHFD, FTHFSDC1	Methylenetetrahydrofolate dehydrogenase (NADP dependent)	0.36935813308925414	0.8152246282690522	FALSE	FALSE	FALSE
ENOG411CRH1	0	5	0	7	0	0.4430856421812228	0	0.314665046428969	2.5	3.5	0.3133088622327388	ENOG411CRH1	1096610, 117558216, 126631430, 147899270, 147901554, 147905464, 148222593, 148229987, 148230663, 148232106, 213623860, 226444, 48735027, 71051198, Xelaev18036444m.g, Xelaev18035220m.g, Xelaev18038010m.g, Xelaev18037278m.g, Xelaev18040658m.g, Xelaev18014489m.g, Xelaev18011206m.g, Xelaev18037727m.g, Xelaev18026097m.g	GenBank, Xenbase_9.1	atp4a.L, Xelaev18035220m.g, atp4a.S, atp12a-like.S, atp1a2.L, atp1a1.S, atp1a1.L, atp1a3.S, atp12a-like.1.L	H/K ATPase:SUBUNIT=alpha, Atp1a1a.1 protein [Xenopus laevis], LOC733327 protein [Xenopus laevis], potassium-transporting ATPase alpha chain 1 [Xenopus laevis], Na+/K+ -ATPase alpha 3 subunit [Xenopus laevis], sodium/potassium-transporting ATPase subunit alpha-1 [Xenopus laevis], hydrogen/potassium-exchanging ATPase 12A [Xenopus laevis], ATPase, Na+/K+ transporting, alpha 1 polypeptide [Xenopus la…	P13637, P05023, P50993, P20648, P54707	ATP1A3, ATP1A1, ATP1A2, ATP4A, ATP12A	NA, KIAA0778, ATP1AL1	ATPase Na K transporting alpha	0.37702300888114026	0.8152246282690522	FALSE	FALSE	FALSE
ENOG411CUCC	0	5	0	7	0	0.4430856421812228	0	0.314665046428969	2.5	3.5	0.3133088622327388	ENOG411CUCC	125859027, 148222158, 148235114, 148238281, Xelaev18047136m.g, Xelaev18032951m.g	GenBank, Xenbase_9.1	gca.S, sri.S	LOC100037199 protein [Xenopus laevis], grancalcin, EF-hand calcium binding protein [Xenopus laevis], uncharacterized protein LOC398957 [Xenopus laevis], sorcin [Xenopus laevis], NA	P30626, P28676	SRI, GCA	NA, GCL	grancalcin, EF-hand calcium binding protein	0.37702300888114026	0.8152246282690522	FALSE	FALSE	FALSE
ENOG411CW1E	21	90	19	103	0.06987476828419119	0.3693684721174845	-0.007442983185561936	0.09227262509252131	55.5	61	0.3105918738783778	ENOG411CW1E	122936479, 139635, 139636, 139639, 139640, 155369239, 189441688, 313758, 55391444, 77748400, Xelaev18022892m.g, Xelaev18025047m.g, Xelaev18022891m.g	GenBank, Xenbase_9.1	loc100494633.L, loc100494633.S, loc100485054.L	LOC100037071 protein [Xenopus laevis], RecName: Full=Vitellogenin-A1; Short=VTG A1; Flags: Precursor, RecName: Full=Vitellogenin-A2; Short=VTG A2; Contains: RecName: Full=Lipovitellin I; Contains: RecName: Full=Lipovitellin II; Contains: RecName: Full=Phosvitin; Flags: Precursor, RecName: Full=Vitellogenin-B1; Short=VTG B1; Flags: Precursor, RecName: Full=Vitellogenin-B2; Short=VTG B2; Flags: Pre…	NA	NA	NA	vitellogenin	0.37805545278843355	0.8152246282690522	FALSE	FALSE	FALSE
ENOG411CPWZ	2	5	3	5	0.5690497043132894	-0.13472677589397158	0.5450980398432168	-0.10037245284987478	3.5	4	0.30711268791009905	ENOG411CPWZ	147905776, Xelaev18003481m.g	GenBank, Xenbase_9.1	Xelaev18003481m.g	ribosomal protein S18 [Xenopus laevis], NA	P62269	RPS18	D6S218E	Ribosomal protein S18	0.37937880026571785	0.8152246282690522	FALSE	FALSE	FALSE
ENOG411D49A	2	6	1	10	-0.45891978196333955	0.8528653720700381	-0.45490196015678314	0.5517042437298185	4	5.5	0.2785615981829826	ENOG411D49A	147904437	GenBank	NA	Sec61 beta subunit [Xenopus laevis]	P60468	SEC61B	NA	SEC61 beta subunit	0.3902906433718321	0.8152246282690522	FALSE	FALSE	FALSE
ENOG411CRY0	2	6	1	10	-0.45891978196333955	0.8528653720700381	-0.45490196015678314	0.5517042437298185	4	5.5	0.2785615981829826	ENOG411CRY0	125858515, 163916492, 56789660, 67678024, Xelaev18018012m.g, Xelaev18020799m.g, Xelaev18004235m.g, Xelaev18008634m.g	GenBank, Xenbase_9.1	tln2.L, tln2.S, tln1.S, Xelaev18008634m.g	LOC100037170 protein [Xenopus laevis], LOC496216 protein [Xenopus laevis], LOC733283 protein [Xenopus laevis], NA	Q9Y4G6, Q9Y490	TLN2, TLN1	KIAA0320, KIAA1027 TLN	K06271 talin	0.3902906433718321	0.8152246282690522	FALSE	FALSE	FALSE
ENOG411CUP5	0	6	0	8	0	0.38748734130500784	0	0.2621976265348337	3	4	0.27399492666071723	ENOG411CUP5	112419317, 11992258, 148234050, 49523112, 63101480, Xelaev18024847m.g	GenBank, Xenbase_9.1	dync1li2.S	MGC154222 protein [Xenopus laevis], cytoplasmic dynein light-intermediate chain 1 [Xenopus laevis], dynein, cytoplasmic 1, light intermediate chain 1 [Xenopus laevis], DLIC1 protein [Xenopus laevis], LOC733238 protein [Xenopus laevis], NA	Q9Y6G9, O43237	DYNC1LI1, DYNC1LI2	DNCLI1, DNCLI2 LIC2	Dynein cytoplasmic 1 light intermediate chain	0.3920442602322589	0.8152246282690522	FALSE	FALSE	FALSE
ENOG411CPDR	3	9	2	13	-0.30240568630540826	0.6730439047850357	-0.28497695871447104	0.3850543743203671	6	7.5	0.26208079765384573	ENOG411CPDR	125858814, 147898991, 147901600, 147902846, Xelaev18039676m.g, Xelaev18022349m.g, Xelaev18041207m.g, Xelaev18024161m.g	GenBank, Xenbase_9.1	pygl.L, loc100491051-like.L, pygl.S, loc100491051-like.S	LOC100037229 protein [Xenopus laevis], uncharacterized protein LOC432134 [Xenopus laevis], liver glycogen phosphorylase [Xenopus laevis], brain glycogen phosphorylase [Xenopus laevis], NA	P11216, P11217, P06737	PYGB, PYGM, PYGL	NA	Phosphorylase is an important allosteric enzyme in carbohydrate metabolism. Enzymes from different sources differ in their regulatory mechanisms and in their natural substrates. However, all known phosphorylases share catalytic and structural properties (By similarity)	0.3966295753753134	0.8152246282690522	FALSE	FALSE	FALSE
ENOG411D496	0	2	0	3	0	0.362119689138276	0	0.314665046428969	1	1.5	0.2560572877908395	ENOG411D496	13021626, 284520139, 284795352	GenBank	NA	nonhistone chromosomal protein HMG-14 [Xenopus laevis], high mobility group nucleosome binding domain 1 [Xenopus laevis]	P05114	HMGN1	HMG14	High mobility group nucleosome binding domain 1	0.39895330105769045	0.8152246282690522	FALSE	FALSE	FALSE
ENOG411CX1A	0	2	0	3	0	0.362119689138276	0	0.314665046428969	1	1.5	0.2560572877908395	ENOG411CX1A	148229681, Xelaev18029675m.g	GenBank, Xenbase_9.1	mccc1.S	methylcrotonoyl-CoA carboxylase 1 (alpha) [Xenopus laevis], NA	Q96RQ3	MCCC1	MCCA	methylcrotonoyl-CoA carboxylase 1 (alpha)	0.39895330105769045	0.8152246282690522	FALSE	FALSE	FALSE
ENOG411CPCE	0	2	0	3	0	0.362119689138276	0	0.314665046428969	1	1.5	0.2560572877908395	ENOG411CPCE	148231986, 68534328, Xelaev18020297m.g, Xelaev18000630m.g, Xelaev18034981m.g	GenBank, Xenbase_9.1	mat2a.S, mat1a.S, mat1a.L	methionine adenosyltransferase II, alpha [Xenopus laevis], M(2)21ab-prov protein [Xenopus laevis], NA	P31153, Q00266	MAT2A, MAT1A	AMS2 MATA2, AMS1 MATA1	Catalyzes the formation of S-adenosylmethionine from methionine and ATP (By similarity)	0.39895330105769045	0.8152246282690522	FALSE	FALSE	FALSE
ENOG411D4B6	0	2	0	3	0	0.362119689138276	0	0.314665046428969	1	1.5	0.2560572877908395	ENOG411D4B6	148222741, 284447300	GenBank	NA	NADH dehydrogenase (ubiquinone) 1 alpha subcomplex, 4 b [Xenopus laevis], NADH dehydrogenase (ubiquinone) 1 alpha subcomplex, 4 a [Xenopus laevis]	Q9NRX3	NDUFA4L2	NA	NADH dehydrogenase (ubiquinone) 1 alpha subcomplex, 4-like 2	0.39895330105769045	0.8152246282690522	FALSE	FALSE	FALSE
ENOG411D4CA	0	2	0	3	0	0.362119689138276	0	0.314665046428969	1	1.5	0.2560572877908395	ENOG411D4CA	126631754, 126631761	GenBank	NA	LOC100049096 protein [Xenopus laevis], LOC100049092 protein [Xenopus laevis]	A0PJW8	DAPL1	EEDA	death associated protein-like 1	0.39895330105769045	0.8152246282690522	FALSE	FALSE	FALSE
ENOG411CSGB	0	2	0	3	0	0.362119689138276	0	0.314665046428969	1	1.5	0.2560572877908395	ENOG411CSGB	116063456, Xelaev18019820m.g, Xelaev18002487m.g	GenBank, Xenbase_9.1	rtcb.S, rtcb.L	MGC154502 protein [Xenopus laevis], NA	Q9Y3I0	RTCB	C22orf28	Catalytic subunit of the tRNA-splicing ligase complex that acts by directly joining spliced tRNA halves to mature-sized tRNAs by incorporating the precursor-derived splice junction phosphate into the mature tRNA as a canonical 3',5'- phosphodiester. May act as a RNA ligase with broad substrate specificity, and may function toward other RNAs (By similarity)	0.39895330105769045	0.8152246282690522	FALSE	FALSE	FALSE
ENOG411CX5P	0	2	0	3	0	0.362119689138276	0	0.314665046428969	1	1.5	0.2560572877908395	ENOG411CX5P	163915605, Xelaev18032173m.g	GenBank, Xenbase_9.1	decr1.L	LOC100137679 protein [Xenopus laevis], NA	Q16698	DECR1	DECR SDR18C1	2,4-dienoyl CoA reductase 1, mitochondrial	0.39895330105769045	0.8152246282690522	FALSE	FALSE	FALSE
ENOG411CU75	0	2	0	3	0	0.362119689138276	0	0.314665046428969	1	1.5	0.2560572877908395	ENOG411CU75	126631414, 40891594, 67678275, Xelaev18010568m.g	GenBank, Xenbase_9.1	loc548788.S	LOC446953 protein [Xenopus laevis], zinc finger protein 183 [Xenopus laevis], NA	O15541	RNF113A	RNF113 ZNF183	Ring finger protein	0.39895330105769045	0.8152246282690522	FALSE	FALSE	FALSE
ENOG411CP6U	0	2	0	3	0	0.362119689138276	0	0.314665046428969	1	1.5	0.2560572877908395	ENOG411CP6U	148228559, Xelaev18036111m.g, Xelaev18037832m.g	GenBank, Xenbase_9.1	Xelaev18036111m.g, otog.S	otogelin precursor [Xenopus laevis], NA	Q3ZCN5	OTOGL	C12orf64	Otogelin-like	0.39895330105769045	0.8152246282690522	FALSE	FALSE	FALSE
ENOG411CTJX	0	2	0	3	0	0.362119689138276	0	0.314665046428969	1	1.5	0.2560572877908395	ENOG411CTJX	148236207, Xelaev18017737m.g, Xelaev18021003m.g	GenBank, Xenbase_9.1	dld.L, dld.S	dihydrolipoamide dehydrogenase [Xenopus laevis], NA	P09622	DLD	GCSL LAD PHE3	dihydrolipoamide dehydrogenase	0.39895330105769045	0.8152246282690522	FALSE	FALSE	FALSE
ENOG411DFH2	0	2	0	3	0	0.362119689138276	0	0.314665046428969	1	1.5	0.2560572877908395	ENOG411DFH2	147904138, 218749891, 28302346, 54311369, Xelaev18028958m.g, Xelaev18038829m.g, Xelaev18026704m.g	GenBank, Xenbase_9.1	Xelaev18028958m.g, Xelaev18038829m.g, Xelaev18026704m.g	heterogeneous nuclear ribonucleoprotein U (scaffold attachment factor A) [Xenopus laevis], heterogeneous nuclear ribonucleoprotein U [Xenopus laevis], Hnrnpu protein [Xenopus laevis], Saf-A protein [Xenopus laevis], NA	NA	NA	NA	Heterogeneous nuclear ribonucleoprotein U (Scaffold attachment factor A)	0.39895330105769045	0.8152246282690522	FALSE	FALSE	FALSE
ENOG411DGJ2	0	2	0	3	0	0.362119689138276	0	0.314665046428969	1	1.5	0.2560572877908395	ENOG411DGJ2	148224241, Xelaev18039806m.g, Xelaev18041128m.g	GenBank, Xenbase_9.1	dhrs7.L, dhrs7.S	dehydrogenase/reductase (SDR family) member 7 [Xenopus laevis], NA	Q9Y394	DHRS7	DHRS7A RETSDR4 SDR34C1	Dehydrogenase reductase SDR family member 7	0.39895330105769045	0.8152246282690522	FALSE	FALSE	FALSE
ENOG411CR9G	0	2	0	3	0	0.362119689138276	0	0.314665046428969	1	1.5	0.2560572877908395	ENOG411CR9G	148230757, Xelaev18032935m.g	GenBank, Xenbase_9.1	gtpbp10.S	GTP-binding protein 10 [Xenopus laevis], NA	A4D1E9	GTPBP10	OBGH2	GTP-binding protein 10	0.39895330105769045	0.8152246282690522	FALSE	FALSE	FALSE
ENOG411CXZF	0	2	0	3	0	0.362119689138276	0	0.314665046428969	1	1.5	0.2560572877908395	ENOG411CXZF	148232280, 148233654	GenBank	NA	uncharacterized protein LOC495491 [Xenopus laevis], aspartyl aminopeptidase [Xenopus laevis]	Q9ULA0	DNPEP	ASPEP DAP	aspartyl aminopeptidase	0.39895330105769045	0.8152246282690522	FALSE	FALSE	FALSE
ENOG411CSRQ	0	2	0	3	0	0.362119689138276	0	0.314665046428969	1	1.5	0.2560572877908395	ENOG411CSRQ	148231173, Xelaev18012175m.g, Xelaev18015003m.g	GenBank, Xenbase_9.1	ipo9.L, ipo9.S	importin 9 [Xenopus laevis], NA	Q96P70	IPO9	IMP9 KIAA1192 RANBP9	Importin 9	0.39895330105769045	0.8152246282690522	FALSE	FALSE	FALSE
ENOG411D0GZ	0	2	0	3	0	0.362119689138276	0	0.314665046428969	1	1.5	0.2560572877908395	ENOG411D0GZ	148223685, Xelaev18029939m.g, Xelaev18027896m.g	GenBank, Xenbase_9.1	copb2.S, copb2.L	coatomer protein complex, subunit beta 2 (beta prime) [Xenopus laevis], NA	P35606	COPB2	NA	coatomer protein complex, subunit beta 2 (beta prime)	0.39895330105769045	0.8152246282690522	FALSE	FALSE	FALSE
ENOG411CV4T	1	3	1	4	0.08422900289364679	0.2738826237906061	0.1300605405643729	0.22155564203748762	2	2.5	0.2532231596501806	ENOG411CV4T	1169421, 49257324	GenBank	NA	RecName: Full=Developmentally-regulated GTP-binding protein 1; Short=DRG-1; Short=xDRG, Xdrg protein [Xenopus laevis]	Q9Y295	DRG1	NEDD3	developmentally regulated GTP binding protein 1	0.400047885391936	0.8152246282690522	FALSE	FALSE	FALSE
ENOG411CR9I	2	13	3	13	0.5690497043132894	-0.21744423666271745	0.5450980398432168	-0.1003724528498746	7.5	8	0.24862261047798667	ENOG411CR9I	148234611, Xelaev18002590m.g, Xelaev18019539m.g	GenBank, Xenbase_9.1	acad9.S, acadvl.L	acyl-CoA dehydrogenase family, member 9 [Xenopus laevis], NA	P49748, Q9H845	ACADVL, ACAD9	VLCAD, NA	acyl-CoA dehydrogenase	0.40182635847016956	0.8152246282690522	FALSE	FALSE	FALSE
ENOG411CQT4	1	9	1	11	0.08422900289364679	0.2671159620866948	0.1300605405643729	0.16266195298391936	5	6	0.24843840727334962	ENOG411CQT4	147905081, 148228458, Xelaev18020350m.g, Xelaev18017107m.g	GenBank, Xenbase_9.1	gfpt1.S, gfpt2.L	glutamine-fructose-6-phosphate transaminase 2 [Xenopus laevis], glutamine--fructose-6-phosphate transaminase 1 [Xenopus laevis], NA	Q06210, O94808	GFPT1, GFPT2	GFAT GFPT, NA	glutamine-fructose-6-phosphate transaminase	0.40189761007050984	0.8152246282690522	FALSE	FALSE	FALSE
ENOG411D4WM	5	6	6	6	0.4925849502375008	-0.14760307730803043	0.35245296190082104	-0.1003724528498746	5.5	6	0.24393902173486431	ENOG411D4WM	351721171, 51593229, Xelaev18047438m.g, Xelaev18046414m.g, Xelaev18045063m.g	GenBank, Xenbase_9.1	atp5j2.S, c17orf80-like.S, atp5j2.L	ATP synthase, H+ transporting, mitochondrial Fo complex, subunit F2 [Xenopus laevis], MGC85584 protein [Xenopus laevis], NA	NA	NA	NA	ATP synthase, H transporting, mitochondrial Fo complex, subunit F2	0.4036390234547238	0.8152246282690522	FALSE	FALSE	FALSE
ENOG411CV9A	2	33	4	31	0.9419135838451803	-0.5984761210564359	0.8670261347305791	-0.18783529410021427	17.5	17.5	0.24284695885142374	ENOG411CV9A	147906871, 148222822, Xelaev18038127m.g, Xelaev18038126m.g, Xelaev18017690m.g	GenBank, Xenbase_9.1	Xelaev18038127m.g, Xelaev18038126m.g, hdac10.L	histone deacetylase 10 [Xenopus laevis], histone deacetylase 6 [Xenopus laevis], NA	Q9UBN7, Q969S8	HDAC6, HDAC10	KIAA0901, NA	Histone deacetylase	0.40406197815696027	0.8152246282690522	FALSE	FALSE	FALSE
ENOG411CYMV	6	24	6	27	0.2070658812968957	0.12578531241065222	0.1300605405643729	0.06312627943300458	15	16.5	0.2353613361966442	ENOG411CYMV	148238092, 157423386	GenBank	NA	40S ribosomal protein S3a-A [Xenopus laevis], LOC100126639 protein [Xenopus laevis]	P61247	RPS3A	FTE1 MFTL	Ribosomal protein S3a	0.4069641462334347	0.8152246282690522	FALSE	FALSE	FALSE
ENOG411CRP2	10	24	9	28	0.03655420319290537	0.2608669910359997	-0.007442983185561936	0.11375235250297262	17	18.5	0.21030854330786	ENOG411CRP2	125858818, 148224478, 148233454, 148236307, 148237986, 153792559, 160333793, 1841845, 49255965, 56388563, Xelaev18005061m.g, Xelaev18040188m.g, Xelaev18002165m.g, Xelaev18044721m.g, Xelaev18005060m.g, Xelaev18034758m.g, Xelaev18044723m.g, Xelaev18037024m.g	GenBank, Xenbase_9.1	Xelaev18005061m.g, loc100485391-like.L, loc100485391-like.1, Xelaev18044721m.g, loc100145536.L, itln1.L, Xelaev18044723m.g, loc100127565.S	LOC398308 protein [Xenopus laevis], 35 kDa serum lectin precursor [Xenopus laevis], intelectin 2 [Xenopus laevis], intelectin 1 (galactofuranose binding) precursor [Xenopus laevis], lectin type 2 precursor [Xenopus laevis], uncharacterized protein LOC100101274 precursor [Xenopus laevis], egg cortical granule lectin precursor [Xenopus laevis], lectin [Xenopus laevis], Unknown (protein for MGC:7992…	Q8WWU7, Q8WWA0	ITLN2, ITLN1	NA, INTL ITLN LFR	Intelectin 1 (Galactofuranose binding)	0.41671343390042853	0.8152246282690522	FALSE	FALSE	FALSE
ENOG411CVKP	7	10	8	10	0.4842405911985635	-0.19064411087181887	0.2999855420066856	-0.10037245284987444	8.5	9	0.2076040621715439	ENOG411CVKP	117167955, 148237440, Xelaev18000429m.g, Xelaev18003848m.g	GenBank, Xenbase_9.1	Xelaev18000429m.g, cct5.S	LOC100036778 protein [Xenopus laevis], chaperonin containing TCP1, subunit 5 (epsilon) [Xenopus laevis], NA	P48643	CCT5	CCTE KIAA0098	chaperonin containing TCP1, subunit 5 (epsilon)	0.41776906615884224	0.8152246282690522	FALSE	FALSE	FALSE
ENOG411CRNZ	3	6	3	7	0.14609973472051171	0.13013515159926928	0.1300605405643729	0.09227262509252131	4.5	5	0.1953275613170122	ENOG411CRNZ	147902483	GenBank	NA	hydroxysteroid dehydrogenase-like protein 2 [Xenopus laevis]	Q6YN16	HSDL2	C9orf99 SDR13C1	Hydroxysteroid dehydrogenase like 2	0.4225682608961061	0.8152246282690522	FALSE	FALSE	FALSE
ENOG411CYGS	0	3	0	4	0	0.2738826237906061	0	0.22155564203748762	1.5	2	0.1936642605315016	ENOG411CYGS	11385666, 11385668, 147905967, Xelaev18021868m.g, Xelaev18024486m.g	GenBank, Xenbase_9.1	ckap5.L, ckap5.S	microtubule associated protein XMAP215 isoform M [Xenopus laevis], microtubule associated protein XMAP215 isoform Z [Xenopus laevis], cytoskeleton associated protein 5 [Xenopus laevis], NA	Q14008	CKAP5	KIAA0097	Cytoskeleton associated protein 5	0.42321938897084965	0.8152246282690522	FALSE	FALSE	FALSE
ENOG411CY4Q	0	3	0	4	0	0.2738826237906061	0	0.22155564203748762	1.5	2	0.1936642605315016	ENOG411CY4Q	Xelaev18044172m.g, Xelaev18046790m.g	Xenbase_9.1	tbcd.L, tbcd.S	NA	Q9BTW9	TBCD	KIAA0988 SSD1 TFCD	tubulin folding cofactor D	0.42321938897084965	0.8152246282690522	FALSE	FALSE	FALSE
ENOG411CZPW	0	3	0	4	0	0.2738826237906061	0	0.22155564203748762	1.5	2	0.1936642605315016	ENOG411CZPW	116063396, 148227308, Xelaev18043552m.g, Xelaev18046277m.g	GenBank, Xenbase_9.1	npepl1.L, npepl1.S	Lap-1 protein [Xenopus laevis], aminopeptidase-like 1 [Xenopus laevis], NA	Q8NDH3	NPEPL1	KIAA1974	Aminopeptidase-like 1	0.42321938897084965	0.8152246282690522	FALSE	FALSE	FALSE
ENOG411CV60	0	3	0	4	0	0.2738826237906061	0	0.22155564203748762	1.5	2	0.1936642605315016	ENOG411CV60	147903930, 148234532, Xelaev18015146m.g	GenBank, Xenbase_9.1	psmb2.S	proteasome (prosome, macropain) subunit, beta type, 2 [Xenopus laevis], uncharacterized protein LOC431796 [Xenopus laevis], NA	P49721	PSMB2	NA	The proteasome is a multicatalytic proteinase complex which is characterized by its ability to cleave peptides with Arg, Phe, Tyr, Leu, and Glu adjacent to the leaving group at neutral or slightly basic pH. The proteasome has an ATP-dependent proteolytic activity	0.42321938897084965	0.8152246282690522	FALSE	FALSE	FALSE
ENOG411CTBI	0	3	0	4	0	0.2738826237906061	0	0.22155564203748762	1.5	2	0.1936642605315016	ENOG411CTBI	148229707, 148237169, Xelaev18031324m.g, Xelaev18033323m.g	GenBank, Xenbase_9.1	sdha.L, sdha.S	succinate dehydrogenase [ubiquinone] flavoprotein subunit B, mitochondrial precursor [Xenopus laevis], succinate dehydrogenase [ubiquinone] flavoprotein subunit A, mitochondrial precursor [Xenopus laevis], NA	P31040	SDHA	SDH2 SDHF	succinate dehydrogenase complex, subunit A, flavoprotein (Fp)	0.42321938897084965	0.8152246282690522	FALSE	FALSE	FALSE
ENOG411D10F	0	3	0	4	0	0.2738826237906061	0	0.22155564203748762	1.5	2	0.1936642605315016	ENOG411D10F	117608, 118764077, 148225136, 148231075	GenBank	NA	RecName: Full=Catenin beta; AltName: Full=Beta-catenin, Ctnnb1 protein [Xenopus laevis], catenin beta [Xenopus laevis], catenin (cadherin-associated protein), beta 1, 88kDa [Xenopus laevis]	P35222	CTNNB1	CTNNB	Armadillo/beta-catenin-like repeat	0.42321938897084965	0.8152246282690522	FALSE	FALSE	FALSE
ENOG411DA9D	0	3	0	4	0	0.2738826237906061	0	0.22155564203748762	1.5	2	0.1936642605315016	ENOG411DA9D	122936412	GenBank	NA	Rps2e protein [Xenopus laevis]	NA	NA	NA	Inherit from NOG: Protein inhibitor of activated STAT	0.42321938897084965	0.8152246282690522	FALSE	FALSE	FALSE
ENOG411D2XW	0	3	0	4	0	0.2738826237906061	0	0.22155564203748762	1.5	2	0.1936642605315016	ENOG411D2XW	109157556, 11513397, 116667156, 119389961, 122074, 134104559, 148234575, 209156433, 214274, 288990, 28948510, 295982349, 296278470, 299689065, 3745758, 4388695, 46015075, 46015085, 46015095, 46015135, 46015145, 46015155, 90108627, Xelaev18004100m.g, Xelaev18030451m.g, Xelaev18001465m.g	GenBank, Xenbase_9.1	Xelaev18004100m.g, loc101732683.L, Xelaev18001465m.g	Chain A, 2.9 Angstrom X-Ray Structure Of Hybrid Macroh2a Nucleosomes, Chain A, 2.6 A Crystal Structure Of A Nucleosome Core Particle Containing The Variant Histone H2a.Z, Chain A, Crystal Structure Of Nucleosome Core Particle Containing A Poly (Da.Dt) Sequence Element, Chain B, Structure Of The H3-H4 Chaperone Asf1 Bound To Histones H3 And H4, RecName: Full=Histone H3.3C, Chain B, Crystal Structu…	P68431, Q71DI3, Q5TEC6	HIST1H3A; HIST1H3B; HIST1H3C; HIST1H3D; HIST1H3E; HIST1H3F; HIST1H3G; HIST1H3H; HIST1H3I; HIST1H3J, HIST2H3A; HIST2H3C; HIST2H3D, HIST2H3PS2	H3FA; H3FL; H3FC; H3FB; H3FD; H3FI; H3FH; H3FK; H3FF; H3FJ, ; H3F2 H3FM;, NA	histone H3	0.42321938897084965	0.8152246282690522	FALSE	FALSE	FALSE
ENOG411DCH8	0	10	0	12	0	0.23653561206102325	0	0.14063564665392023	5	6	0.16725593528046004	ENOG411DCH8	117558226, 27695136, 46250287, 58618876, 83318412, Xelaev18029541m.g, Xelaev18027425m.g	GenBank, Xenbase_9.1	eif4g3-like.S, eif4g3-like.L	LOC733162 protein [Xenopus laevis], LOC398533 protein [Xenopus laevis], LOC733435 protein [Xenopus laevis], NA	Q04637	EIF4G1	EIF4F EIF4G EIF4GI	eukaryotic translation initiation factor 4, gamma 1	0.43358433711077327	0.8152246282690522	FALSE	FALSE	FALSE
ENOG411CYN2	0	10	0	12	0	0.23653561206102325	0	0.14063564665392023	5	6	0.16725593528046004	ENOG411CYN2	116063392, 123910711, 28278772, 61403346, 8886479, Xelaev18032285m.g	GenBank, Xenbase_9.1	eif3e.L	Eif3e-a protein [Xenopus laevis], RecName: Full=Eukaryotic translation initiation factor 3 subunit E-B; Short=eIF3e-B; AltName: Full=Eukaryotic translation initiation factor 3 subunit 6-B, Eif3e-b protein [Xenopus laevis], Int-6 protein [Xenopus laevis], NA	P60228	EIF3E	EIF3S6 INT6	Component of the eukaryotic translation initiation factor 3 (eIF-3) complex, which is required for several steps in the initiation of protein synthesis. The eIF-3 complex associates with the 40S ribosome and facilitates the recruitment of eIF-1, eIF-1A, eIF-2 GTP methionyl-tRNAi and eIF-5 to form the 43S preinitiation complex (43S PIC). The eIF-3 complex stimulates mRNA recruitment to the 43S PIC…	0.43358433711077327	0.8152246282690522	FALSE	FALSE	FALSE
ENOG411D4ST	0	4	0	5	0	0.21316882049393154	0	0.16266195298391936	2	2.5	0.15073311850879687	ENOG411D4ST	148233446, 3676338, Xelaev18029256m.g, Xelaev18027168m.g	GenBank, Xenbase_9.1	marcks.S, marcks.L	myristoylated alanine rich protein kinase C substrate [Xenopus laevis], myristoylated alanine-rich C kinase substrate [Xenopus laevis], NA	P29966	MARCKS	MACS PRKCSL	myristoylated alanine-rich protein kinase C substrate	0.4400931234575977	0.8152246282690522	FALSE	FALSE	FALSE
ENOG411DEXB	0	4	0	5	0	0.21316882049393154	0	0.16266195298391936	2	2.5	0.15073311850879687	ENOG411DEXB	147898544, 147900831, Xelaev18012683m.g, Xelaev18015309m.g	GenBank, Xenbase_9.1	taf15.L, taf15.S	MGC80893 protein [Xenopus laevis], TAF15 RNA polymerase II, TATA box binding protein (TBP)-associated factor, 68kDa [Xenopus laevis], NA	NA	NA	NA	TAF15 RNA polymerase II, TATA box binding protein (TBP)-associated factor, 68kDa	0.4400931234575977	0.8152246282690522	FALSE	FALSE	FALSE
ENOG411CQ4T	0	4	0	5	0	0.21316882049393154	0	0.16266195298391936	2	2.5	0.15073311850879687	ENOG411CQ4T	133258, 147900728, 147905111, 148227778, 148230657, 148233568, 148237229, 1710623, 213625123, 214241, 76780030, Xelaev18030977m.g, Xelaev18047194m.g, Xelaev18016014m.g, Xelaev18044730m.g, Xelaev18013553m.g	GenBank, Xenbase_9.1	hnrnpa2b1.L, hnrnpa3.S, hnrnpa1.S, hnrnpa3.L, hnrnpa1.L	RecName: Full=Heterogeneous nuclear ribonucleoproteins A1 homolog; Short=hnRNP A1; AltName: Full=Helix-destabilizing protein; AltName: Full=Single-strand-binding protein; AltName: Full=hnRNP core protein A1, heterogeneous nuclear ribonucleoproteins A1 homolog [Xenopus laevis], heterogeneous nuclear ribonucleoprotein A3 homolog 2 [Xenopus laevis], heterogeneous nuclear ribonucleoprotein A2 homolog…	P51991, P22626	HNRNPA3, HNRNPA2B1	HNRPA3, HNRPA2B1	heterogeneous nuclear ribonucleoprotein	0.4400931234575977	0.8152246282690522	FALSE	FALSE	FALSE
ENOG411CY0H	0	4	0	5	0	0.21316882049393154	0	0.16266195298391936	2	2.5	0.15073311850879687	ENOG411CY0H	147899643, 148230633, 21779939, Xelaev18024227m.g	GenBank, Xenbase_9.1	stip1.S	stress-induced-phosphoprotein 1 (Hsp70/Hsp90-organizing protein) [Xenopus laevis], stress-induced-phosphoprotein 1 [Xenopus laevis], stress-induced phosphoprotein STI1 [Xenopus laevis], NA	P31948	STIP1	NA	stress-induced-phosphoprotein 1	0.4400931234575977	0.8152246282690522	FALSE	FALSE	FALSE
ENOG411CXM0	0	4	0	5	0	0.21316882049393154	0	0.16266195298391936	2	2.5	0.15073311850879687	ENOG411CXM0	147906318, Xelaev18013352m.g, Xelaev18015853m.g	GenBank, Xenbase_9.1	cs.L, cs.S	citrate synthase, mitochondrial precursor [Xenopus laevis], NA	O75390	CS	NA	citrate synthase	0.4400931234575977	0.8152246282690522	FALSE	FALSE	FALSE
ENOG411CPXC	0	4	0	5	0	0.21316882049393154	0	0.16266195298391936	2	2.5	0.15073311850879687	ENOG411CPXC	209969740, 47938740, Xelaev18002234m.g, Xelaev18001297m.g	GenBank, Xenbase_9.1	eif3c.S, eif3c.L	eukaryotic translation initiation factor 3 subunit C [Xenopus laevis], LOC432230 protein [Xenopus laevis], NA	Q99613, B5ME19	EIF3C, EIF3CL	EIF3S8, NA	Component of the eukaryotic translation initiation factor 3 (eIF-3) complex, which is required for several steps in the initiation of protein synthesis. The eIF-3 complex associates with the 40S ribosome and facilitates the recruitment of eIF-1, eIF-1A, eIF-2 GTP methionyl-tRNAi and eIF-5 to form the 43S preinitiation complex (43S PIC). The eIF-3 complex stimulates mRNA recruitment to the 43S PIC…	0.4400931234575977	0.8152246282690522	FALSE	FALSE	FALSE
ENOG411CWUJ	0	4	0	5	0	0.21316882049393154	0	0.16266195298391936	2	2.5	0.15073311850879687	ENOG411CWUJ	28277312, 54038766, Xelaev18022322m.g, Xelaev18024186m.g, Xelaev18028793m.g, Xelaev18026093m.g, Xelaev18039910m.g	GenBank, Xenbase_9.1	Xelaev18022322m.g, Xelaev18024186m.g, sptbn1.S, sptbn1.L, sptb.L	LOC398511 protein [Xenopus laevis], NA	Q01082, P11277	SPTBN1, SPTB	SPTB2, SPTB1	Spectrin beta	0.4400931234575977	0.8152246282690522	FALSE	FALSE	FALSE
ENOG411CVVF	0	4	0	5	0	0.21316882049393154	0	0.16266195298391936	2	2.5	0.15073311850879687	ENOG411CVVF	148235541, Xelaev18003090m.g, Xelaev18046585m.g	GenBank, Xenbase_9.1	rpn2.L, rpn2.S	ribophorin II precursor [Xenopus laevis], NA	P04844	RPN2	NA	Ribophorin II	0.4400931234575977	0.8152246282690522	FALSE	FALSE	FALSE
ENOG411D3W3	0	4	0	5	0	0.21316882049393154	0	0.16266195298391936	2	2.5	0.15073311850879687	ENOG411D3W3	126631444, Xelaev18016425m.g	GenBank, Xenbase_9.1	ndufc2.S	LOC100049100 protein [Xenopus laevis], NA	O95298, E9PQ53	NDUFC2, NDUFC2-KCTD14	NA	Accessory subunit of the mitochondrial membrane respiratory chain NADH dehydrogenase (Complex I), that is believed not to be involved in catalysis. Complex I functions in the transfer of electrons from NADH to the respiratory chain. The immediate electron acceptor for the enzyme is believed to be ubiquinone (By similarity)	0.4400931234575977	0.8152246282690522	FALSE	FALSE	FALSE
ENOG411CWGS	2	8	2	9	0.11920377284128798	0.0724773229235463	0.1300605405643729	0.05163064059517528	5	5.5	0.13553900264058233	ENOG411CWGS	147900512, 147906274, Xelaev18028048m.g	GenBank, Xenbase_9.1	pdia6.L	protein disulfide isomerase family A, member 6 precursor [Xenopus laevis], NA	Q15084	PDIA6	ERP5 P5 TXNDC7	Protein disulfide isomerase family A, member 6	0.4460928645542937	0.8152246282690522	FALSE	FALSE	FALSE
ENOG411CTCD	0	5	0	6	0	0.16714814517124252	0	0.12201996848657304	2.5	3	0.11819158691333906	ENOG411CTCD	148227348, 148229844, 2648045, 32450569	GenBank	NA	26S protease regulatory subunit 6A-A [Xenopus laevis], 26S protease regulatory subunit 6A-B [Xenopus laevis], TBP10 protein [Xenopus laevis], Psmc3-prov protein [Xenopus laevis]	P17980	PSMC3	TBP1	Proteasome (Prosome, macropain) 26S subunit, ATPase, 3	0.45295792795237944	0.8152246282690522	FALSE	FALSE	FALSE
ENOG411CQFA	0	5	0	6	0	0.16714814517124252	0	0.12201996848657304	2.5	3	0.11819158691333906	ENOG411CQFA	1350933, 148237954	GenBank	NA	RecName: Full=40S ribosomal protein S13, ribosomal protein S13 [Xenopus laevis]	P62277	RPS13	NA	Ribosomal protein S13	0.45295792795237944	0.8152246282690522	FALSE	FALSE	FALSE
ENOG411D4B1	0	5	0	6	0	0.16714814517124252	0	0.12201996848657304	2.5	3	0.11819158691333906	ENOG411D4B1	148222545, Xelaev18035433m.g	GenBank, Xenbase_9.1	atp5l.L	ATP synthase, H+ transporting, mitochondrial Fo complex, subunit G [Xenopus laevis], NA	O75964	ATP5MG	ATP5L	Mitochondrial membrane ATP synthase (F(1)F(0) ATP synthase or Complex V) produces ATP from ADP in the presence of a proton gradient across the membrane which is generated by electron transport complexes of the respiratory chain. F-type ATPases consist of two structural domains, F(1) - containing the extramembraneous catalytic core, and F(0) - containing the membrane proton channel, linked togethe…	0.45295792795237944	0.8152246282690522	FALSE	FALSE	FALSE
ENOG411D2E0	0	5	0	6	0	0.16714814517124252	0	0.12201996848657304	2.5	3	0.11819158691333906	ENOG411D2E0	148225843, Xelaev18008662m.g, Xelaev18003711m.g	GenBank, Xenbase_9.1	loc448531.S, loc448531.1.L	uncharacterized protein LOC379587 [Xenopus laevis], NA	NA	NA	NA	programmed cell death	0.45295792795237944	0.8152246282690522	FALSE	FALSE	FALSE
ENOG411CY65	0	14	0	16	0	0.14035145015000705	0	0.08019979279194617	7	8	0.09924346215043567	ENOG411CY65	147905228, Xelaev18012172m.g	GenBank, Xenbase_9.1	tuba3c.L	tubulin, alpha 3c [Xenopus laevis], NA	NA	NA	NA	Tubulin is the major constituent of microtubules. It binds two moles of GTP, one at an exchangeable site on the beta chain and one at a non-exchangeable site on the alpha chain (By similarity)	0.46047248368103616	0.8152246282690522	FALSE	FALSE	FALSE
ENOG411D3XT	0	6	0	7	0	0.13013515159926928	0	0.09227262509252131	3	3.5	0.09201944816658268	ENOG411D3XT	148224058, Xelaev18015162m.g, Xelaev18028976m.g	GenBank, Xenbase_9.1	Xelaev18015162m.g, Xelaev18028976m.g	ATPase inhibitory factor 1 [Xenopus laevis], NA	Q9UII2	ATP5IF1	ATPI ATPIF1	ATPase inhibitory factor 1	0.4633412938728572	0.8152246282690522	FALSE	FALSE	FALSE
ENOG411CQMA	0	6	0	7	0	0.13013515159926928	0	0.09227262509252131	3	3.5	0.09201944816658268	ENOG411CQMA	147905091, 148234320, 163915813, 354459377, Xelaev18014440m.g	GenBank, Xenbase_9.1	Xelaev18014440m.g	ATPase, H+ transporting, lysosomal 70kDa, V1 subunit A [Xenopus laevis], ATPase, H+ transporting, lysosomal 70kDa, V1 subunit A, isoform 1 [Xenopus laevis], LOC100137685 protein [Xenopus laevis], uncharacterized protein LOC100137685 [Xenopus laevis], NA	P38606	ATP6V1A	ATP6A1 ATP6V1A1 VPP2	ATPase, H transporting, lysosomal 70kDa, V1 subunit A	0.4633412938728572	0.8152246282690522	FALSE	FALSE	FALSE
ENOG411CVFB	0	6	0	7	0	0.13013515159926928	0	0.09227262509252131	3	3.5	0.09201944816658268	ENOG411CVFB	147903260, 148237470, Xelaev18013281m.g, Xelaev18023027m.g	GenBank, Xenbase_9.1	sucla2.L, Xelaev18023027m.g	succinate-CoA ligase, ADP-forming, beta subunit [Xenopus laevis], succinate-CoA ligase, GDP-forming, beta subunit [Xenopus laevis], NA	Q96I99, Q9P2R7	SUCLG2, SUCLA2	NA	beta subunit	0.4633412938728572	0.8152246282690522	FALSE	FALSE	FALSE
ENOG411D0YG	0	6	0	7	0	0.13013515159926928	0	0.09227262509252131	3	3.5	0.09201944816658268	ENOG411D0YG	147903795, Xelaev18011698m.g, Xelaev18014154m.g, Xelaev18037595m.g	GenBank, Xenbase_9.1	Xelaev18011698m.g, Xelaev18014154m.g, Xelaev18037595m.g	60S ribosomal protein L23a [Xenopus laevis], NA	P62750	RPL23A	NA	ribosomal protein L23a	0.4633412938728572	0.8152246282690522	FALSE	FALSE	FALSE
ENOG411CV6K	0	6	0	7	0	0.13013515159926928	0	0.09227262509252131	3	3.5	0.09201944816658268	ENOG411CV6K	147900069, Xelaev18012399m.g	GenBank, Xenbase_9.1	rpl8.L	60S ribosomal protein L8 [Xenopus laevis], NA	P62917	RPL8	NA	ribosomal protein L8	0.4633412938728572	0.8152246282690522	FALSE	FALSE	FALSE
ENOG411CQFB	0	6	0	7	0	0.13013515159926928	0	0.09227262509252131	3	3.5	0.09201944816658268	ENOG411CQFB	147899475, 148232824, 30353795, 64970, Xelaev18031658m.g	GenBank, Xenbase_9.1	loc100490872.L	polyadenylate-binding protein 1-B [Xenopus laevis], polyadenylate-binding protein 1-A [Xenopus laevis], Pabpc1 protein [Xenopus laevis], polyA binding protein [Xenopus laevis], NA	P11940, Q9H361	PABPC1, PABPC3	PAB1 PABP1 PABPC2, PABP3 PABPL3	poly(A) binding protein, cytoplasmic	0.4633412938728572	0.8152246282690522	FALSE	FALSE	FALSE
ENOG411CQKQ	8	21	10	19	0.7156269397387811	-0.593993669437265	0.4195671577593579	-0.23787597659980947	14.5	14.5	0.08600771024809838	ENOG411CQKQ	1170732, 1170735, 1170736, 147906570, 148224415, 148227690, Xelaev18021657m.g, Xelaev18016867m.g, Xelaev18019895m.g	GenBank, Xenbase_9.1	Xelaev18021657m.g, Xelaev18016867m.g, Xelaev18019895m.g	RecName: Full=L-lactate dehydrogenase A chain; Short=LDH-A, RecName: Full=L-lactate dehydrogenase B chain; Short=LDH-B, RecName: Full=L-lactate dehydrogenase C chain; Short=LDH-C, lactate dehydrogenase A [Xenopus laevis], L-lactate dehydrogenase B chain [Xenopus laevis], NA	P00338, P07195	LDHA, LDHB	NA	Lactate dehydrogenase	0.4657301440245264	0.8152246282690522	FALSE	FALSE	FALSE
ENOG411CT7F	2	5	3	4	0.5690497043132894	-0.4687799360862055	0.5450980398432168	-0.36340685868366845	3.5	3.5	0.07090143306137443	ENOG411CT7F	133095, 1350785, 147903513, 147907108, 148234813, 4584831, 65047, 65068, Xelaev18037699m.g, Xelaev18035926m.g	GenBank, Xenbase_9.1	rpl18.S, rpl18.L	RecName: Full=60S ribosomal protein L18-A; AltName: Full=L14A, RecName: Full=60S ribosomal protein L18-B; AltName: Full=L14B, 60S ribosomal protein L18-B [Xenopus laevis], 60S ribosomal protein L18-A [Xenopus laevis], uncharacterized protein LOC734315 [Xenopus laevis], unnamed protein product [Xenopus laevis], ribosomal protein L14 [Xenopus laevis], NA	Q07020	RPL18	NA	ribosomal protein L18	0.4717381014149718	0.8152246282690522	FALSE	FALSE	FALSE
ENOG411CVDM	1	0	1	0	0.08422900289364679	0	0.1300605405643729	0	0.5	0.5	0.059558899118678975	ENOG411CVDM	147905274, Xelaev18030711m.g	GenBank, Xenbase_9.1	pitrm1.L	presequence protease, mitochondrial precursor [Xenopus laevis], NA	Q5JRX3	PITRM1	KIAA1104 MP1 PREP	pitrilysin metallopeptidase 1	0.4762534769882585	0.8152246282690522	FALSE	FALSE	FALSE
ENOG411CXGW	10	20	9	22	0.03655420319290537	0.03966609437452741	-0.007442983185561936	0.03087208042837799	15	15.5	0.05389588927398823	ENOG411CXGW	148228908, 551286, Xelaev18003793m.g, Xelaev18046891m.g	GenBank, Xenbase_9.1	Xelaev18003793m.g, rps11.S	40S ribosomal protein S11 [Xenopus laevis], ribosomal protein S11 [Xenopus laevis], NA	P62280	RPS11	NA	ribosomal protein S11	0.4785090558958709	0.8152246282690522	FALSE	FALSE	FALSE
ENOG411CZ97	0	8	0	9	0	0.0724773229235463	0	0.05163064059517528	4	4.5	0.0512492065214868	ENOG411CZ97	Xelaev18009523m.g, Xelaev18005855m.g	Xenbase_9.1	loc100490725.S, loc100490725.L	NA	O95210	STBD1	NA	Starch binding domain 1	0.4795634710992807	0.8152246282690522	FALSE	FALSE	FALSE
ENOG411CRFD	0	8	0	9	0	0.0724773229235463	0	0.05163064059517528	4	4.5	0.0512492065214868	ENOG411CRFD	111598535, 147899436, 147907116, 148230593, 1708482, 1708484, Xelaev18045061m.g	GenBank, Xenbase_9.1	kpna7.L	LOC398027 protein [Xenopus laevis], karyopherin alpha 2 (RAG cohort 1, importin alpha 1) [Xenopus laevis], importin subunit alpha-1 [Xenopus laevis], karyopherin alpha-2 subunit like [Xenopus laevis], RecName: Full=Importin subunit alpha-1; AltName: Full=Karyopherin subunit alpha-1, RecName: Full=Importin subunit alpha-2; AltName: Full=Karyopherin subunit alpha-2, NA	P52292, A9QM74	KPNA2, KPNA7	RCH1 SRP1, NA	Karyopherin alpha 2 (RAG cohort 1, importin alpha 1)	0.4795634710992807	0.8152246282690522	FALSE	FALSE	FALSE
ENOG411D3EG	3	2	2	3	-0.30240568630540826	0.362119689138276	-0.28497695871447104	0.314665046428969	2.5	2.5	0.0422241763349135	ENOG411D3EG	147902974, 284413673, Xelaev18004521m.g	GenBank, Xenbase_9.1	Xelaev18004521m.g	ribosomal protein L29 [Xenopus laevis], NA	P47914	RPL29	NA	ribosomal protein L29	0.48315999490787387	0.8152246282690522	FALSE	FALSE	FALSE
ENOG411D4DK	2	1	1	2	-0.45891978196333955	0.5166149040537386	-0.45490196015678314	0.48459004787128135	1.5	1.5	0.040796612071506914	ENOG411D4DK	148226202, Xelaev18029059m.g, Xelaev18043517m.g	GenBank, Xenbase_9.1	Xelaev18029059m.g, rps21.L	40S ribosomal protein S21 [Xenopus laevis], NA	P63220	RPS21	NA	ribosomal protein S21	0.48372902014367036	0.8152246282690522	FALSE	FALSE	FALSE
ENOG411CWV8	0	9	0	10	0	0.049006195312205784	0	0.037131070900060376	4.5	5	0.0346526130254131	ENOG411CWV8	148224176	GenBank	NA	long-chain acyl-CoA dehydrogenase [Xenopus laevis]	P28330	ACADL	NA	acyl-CoA dehydrogenase, long chain	0.48617837376951484	0.8152246282690522	FALSE	FALSE	FALSE
ENOG411D5XU	2	2	2	2	0.11920377284128798	-0.08517877068950216	0.1300605405643729	-0.10037245284987478	2	2	0.024059309751414622	ENOG411D5XU	114494	GenBank	NA	RecName: Full=ATP synthase protein 8; AltName: Full=A6L; AltName: Full=F-ATPase subunit 8	NA	NA	NA	Mitochondrial membrane ATP synthase (F(1)F(0) ATP synthase or Complex V) produces ATP from ADP in the presence of a proton gradient across the membrane which is generated by electron transport complexes of the respiratory chain. F-type ATPases consist of two structural domains, F(1) - containing the extramembraneous catalytic core and F(0) - containing the membrane proton channel, linked together…	0.49040265001677413	0.8152246282690522	FALSE	FALSE	FALSE
ENOG411DEMV	2	2	2	2	0.11920377284128798	-0.08517877068950216	0.1300605405643729	-0.10037245284987478	2	2	0.024059309751414622	ENOG411DEMV	147905959, 16332351, Xelaev18014917m.g	GenBank, Xenbase_9.1	Xelaev18014917m.g	glutathione S-transferase mu 2 [Xenopus laevis], glutathione S-transferase [Xenopus laevis], NA	NA	NA	NA	Glutathione S-transferase mu	0.49040265001677413	0.8152246282690522	FALSE	FALSE	FALSE
ENOG411CWB2	2	2	2	2	0.11920377284128798	-0.08517877068950216	0.1300605405643729	-0.10037245284987478	2	2	0.024059309751414622	ENOG411CWB2	147903211, Xelaev18040672m.g	GenBank, Xenbase_9.1	tagln2.L	transgelin 2 [Xenopus laevis], NA	Q9UI15, P37802	TAGLN3, TAGLN2	NP25, KIAA0120	Transgelin	0.49040265001677413	0.8152246282690522	FALSE	FALSE	FALSE
ENOG411CRCE	2	2	2	2	0.11920377284128798	-0.08517877068950216	0.1300605405643729	-0.10037245284987478	2	2	0.024059309751414622	ENOG411CRCE	116063390, 124481860, 126362005, 46329485, 46329769, Xelaev18039369m.g, Xelaev18042561m.g	GenBank, Xenbase_9.1	psmd8.L, psmd8.S	LOC414691 protein [Xenopus laevis], LOC414721 protein [Xenopus laevis], Unknown (protein for IMAGE:6317435) [Xenopus laevis], NA	P48556	PSMD8	NA	Proteasome (Prosome, macropain) 26S subunit, non-ATPase, 8	0.49040265001677413	0.8152246282690522	FALSE	FALSE	FALSE
ENOG411D3JR	3	4	3	4	0.14609973472051171	-0.12048918043337997	0.1300605405643729	-0.1003724528498746	3.5	3.5	0.01810939660637706	ENOG411D3JR	147904232, 148224536	GenBank	NA	ribosomal protein L30 [Xenopus laevis], MGC82844 protein [Xenopus laevis]	P62888	RPL30	NA	Ribosomal protein L30	0.49277579088684137	0.8152246282690522	FALSE	FALSE	FALSE
ENOG411CS7X	1	2	2	1	0.6653122764971168	-0.6641402295963569	0.715023041285529	-0.685334953571031	1.5	1.5	8.28762311395997e-4	ENOG411CS7X	148236843, Xelaev18033119m.g	GenBank, Xenbase_9.1	rpl15.S	ribosomal protein L15 [Xenopus laevis], NA	P61313	RPL15	EC45	Ribosomal protein L15	0.49966937171142944	0.8152246282690522	FALSE	FALSE	FALSE
ENOG411CZ0Y	1	2	1	2	0.08422900289364679	-0.08517877068950216	0.1300605405643729	-0.10037245284987478	1.5	1.5	-6.71587249001934e-4	ENOG411CZ0Y	147901313, 163916340, 62185799, Xelaev18038786m.g, Xelaev18042102m.g	GenBank, Xenbase_9.1	vbp1.L, vbp1.S	von Hippel-Lindau binding protein 1 [Xenopus laevis], Unknown (protein for MGC:180103) [Xenopus laevis], LOC733191 protein [Xenopus laevis], NA	P61758	VBP1	PFDN3	von Hippel-Lindau binding protein 1	0.500267924528465	0.8152246282690522	FALSE	FALSE	FALSE
ENOG411D3RJ	2	4	2	4	0.11920377284128798	-0.12048918043337997	0.1300605405643729	-0.1003724528498746	3	3	-9.089204249569168e-4	ENOG411D3RJ	148222991, 148234883	GenBank	NA	CDGSH iron sulfur domain 1 [Xenopus laevis]	Q9NZ45	CISD1	C10orf70 ZCD1	CDGSH iron sulfur domain 1	0.5003626067371086	0.8152246282690522	FALSE	FALSE	FALSE
ENOG411CYED	2	4	2	4	0.11920377284128798	-0.12048918043337997	0.1300605405643729	-0.1003724528498746	3	3	-9.089204249569168e-4	ENOG411CYED	147903369, Xelaev18007868m.g, Xelaev18010675m.g	GenBank, Xenbase_9.1	rpl6.L, rpl6.S	ribosomal protein L6 [Xenopus laevis], NA	Q02878	RPL6	TXREB1	ribosomal protein L6	0.5003626067371086	0.8152246282690522	FALSE	FALSE	FALSE
ENOG411CYCR	5	23	4	26	-0.1461133029540556	0.14051215417443286	-0.13297386526942087	0.06955254859243754	14	15	-0.003960610284506005	ENOG411CYCR	147899563, Xelaev18047373m.g	GenBank, Xenbase_9.1	ndufs1.S	NADH dehydrogenase (ubiquinone) Fe-S protein 1, 75kDa (NADH-coenzyme Q reductase) [Xenopus laevis], NA	P28331	NDUFS1	NA	NADH dehydrogenase (ubiquinone) Fe-S protein 1, 75kDa (NADH-coenzyme Q reductase)	0.5015800507677874	0.8152246282690522	FALSE	FALSE	FALSE
ENOG411CVAT	3	7	3	7	0.14609973472051171	-0.15944822564928643	0.1300605405643729	-0.10037245284987478	5	5	-0.009438808454343715	ENOG411CVAT	Xelaev18046070m.g, Xelaev18043317m.g	Xenbase_9.1	psmd11.S, psmd11.L	NA	O00231	PSMD11	NA	proteasome (prosome, macropain) 26S subunit, non-ATPase, 11	0.5037654838571122	0.8152246282690522	FALSE	FALSE	FALSE
ENOG411CZBS	3	8	3	8	0.14609973472051171	-0.1704773006495976	0.1300605405643729	-0.10037245284987478	5.5	5.5	-0.017237542177278766	ENOG411CZBS	147907242, Xelaev18039244m.g, Xelaev18039217m.g, Xelaev18042470m.g	GenBank, Xenbase_9.1	vars2.L, vars.L, vars.S	valyl-tRNA synthetase [Xenopus laevis], NA	A0A0G2JL52, A0A140TA35, A0A140TA36, Q5ST30, A0A0A0MTG1, P26640	VARS2, VARS	NA, KIAA1885 VARS2L VARSL, G7A VARS2	Valyl-tRNA synthetase	0.506876443846795	0.8152246282690522	FALSE	FALSE	FALSE
ENOG411D45G	2	6	2	6	0.11920377284128798	-0.14760307730803043	0.1300605405643729	-0.1003724528498746	4	4	-0.020081340769414993	ENOG411D45G	1350972, Xelaev18004112m.g, Xelaev18040826m.g, Xelaev18020804m.g, Xelaev18018006m.g, Xelaev18042936m.g	GenBank, Xenbase_9.1	Xelaev18004112m.g, Xelaev18040826m.g, Xelaev18020804m.g, Xelaev18018006m.g, Xelaev18042936m.g	RecName: Full=40S ribosomal protein S27, NA	P42677, Q71UM5	RPS27, RPS27L	MPS1, NA	40S ribosomal protein S27	0.5080107574731108	0.8152246282690522	FALSE	FALSE	FALSE
ENOG411CT8H	2	6	2	6	0.11920377284128798	-0.14760307730803043	0.1300605405643729	-0.1003724528498746	4	4	-0.020081340769414993	ENOG411CT8H	117049, 304556741, 4096593	GenBank	NA	RecName: Full=Cytochrome c oxidase subunit 2; AltName: Full=Cytochrome c oxidase polypeptide II, cytochrome c oxidase subunit II [Xenopus laevis], cytochrome c oxidase II [Xenopus laevis]	P00403	MT-CO2	COII COX2 COXII MTCO2	Cytochrome c oxidase is the component of the respiratory chain that catalyzes the reduction of oxygen to water. Subunits 1- 3 form the functional core of the enzyme complex. Subunit 2 transfers the electrons from cytochrome c via its binuclear copper A center to the bimetallic center of the catalytic subunit 1	0.5080107574731108	0.8152246282690522	FALSE	FALSE	FALSE
ENOG411CTCS	2	7	2	7	0.11920377284128798	-0.15944822564928643	0.1300605405643729	-0.10037245284987478	4.5	4.5	-0.028457125485677692	ENOG411CTCS	147904469, 148222361, Xelaev18047636m.g	GenBank, Xenbase_9.1	uqcrc2.S	Ubiquinol-cytochrome C reductase complex [Xenopus laevis], ubiquinol-cytochrome c reductase core protein II [Xenopus laevis], NA	P22695	UQCRC2	NA	ubiquinol-cytochrome c reductase core protein II	0.5113512184630162	0.8152246282690522	FALSE	FALSE	FALSE
ENOG411D02Q	1	5	1	5	0.08422900289364679	-0.13472677589397158	0.1300605405643729	-0.10037245284987478	3	3	-0.035707317723348606	ENOG411D02Q	147907256, 51258671, Xelaev18033899m.g, Xelaev18032233m.g	GenBank, Xenbase_9.1	mtdh.S, mtdh.L	uncharacterized protein LOC446286 [Xenopus laevis], LOC446286 protein [Xenopus laevis], NA	Q86UE4	MTDH	AEG1 LYRIC	metadherin	0.5142421322124204	0.8152246282690522	FALSE	FALSE	FALSE
ENOG411CZ5U	0	1	0	1	0	-0.06022343815674253	0	-0.10037245284987478	0.5	0.5	-0.04258440150700132	ENOG411CZ5U	118835679, 118835688, 120521, 147899487, 148224146, 148226276, 148236235, 33331485, 64691, Xelaev18037839m.g, Xelaev18037841m.g	GenBank, Xenbase_9.1	Xelaev18037839m.g, Xelaev18037841m.g	LOC100036818 protein [Xenopus laevis], LOC100036823 protein [Xenopus laevis], RecName: Full=Ferritin heavy chain B; Short=Ferritin H subunit B; AltName: Full=Ferritin heavy chain 1, MGC82632 protein [Xenopus laevis], ferritin heavy chain 1 a [Xenopus laevis], ferritin heavy chain A [Xenopus laevis], ferritin heavy chain, oocyte isoform [Xenopus laevis], ferritin heavy chain [Xenopus laevis], unna…	NA	NA	NA	Stores iron in a soluble, non-toxic, readily available form. Important for iron homeostasis (By similarity)	0.5169835849976983	0.8152246282690522	FALSE	FALSE	FALSE
ENOG411CXWY	0	1	0	1	0	-0.06022343815674253	0	-0.10037245284987478	0.5	0.5	-0.04258440150700132	ENOG411CXWY	148224080, 148233772, Xelaev18033225m.g, Xelaev18000268m.g	GenBank, Xenbase_9.1	Xelaev18033225m.g, Xelaev18000268m.g	cullin 1 [Xenopus laevis], uncharacterized protein LOC734526 [Xenopus laevis], NA	Q13616	CUL1	NA	Cullin 1	0.5169835849976983	0.8152246282690522	FALSE	FALSE	FALSE
ENOG411DAIF	0	1	0	1	0	-0.06022343815674253	0	-0.10037245284987478	0.5	0.5	-0.04258440150700132	ENOG411DAIF	11527140, 147907300, Xelaev18007032m.g	GenBank, Xenbase_9.1	pabpn1.L	poly(A) binding protein II [Xenopus laevis], polyadenylate-binding protein 2-B [Xenopus laevis], NA	NA	NA	NA	RRM	0.5169835849976983	0.8152246282690522	FALSE	FALSE	FALSE
ENOG411CQZ6	0	1	0	1	0	-0.06022343815674253	0	-0.10037245284987478	0.5	0.5	-0.04258440150700132	ENOG411CQZ6	124961, 124965, 147905246, 47937577, Xelaev18030727m.g, Xelaev18032868m.g	GenBank, Xenbase_9.1	itgb1.L, itgb1.S	RecName: Full=Integrin beta-1-B; AltName: Full=Integrin beta-1*; Flags: Precursor, RecName: Full=Integrin beta-1-A; Flags: Precursor, integrin beta-1-B precursor [Xenopus laevis], ITGB1 protein [Xenopus laevis], NA	P05556	ITGB1	FNRB MDF2 MSK12	integrin, beta 1 (fibronectin receptor, beta polypeptide, antigen CD29 includes MDF2, MSK12)	0.5169835849976983	0.8152246282690522	FALSE	FALSE	FALSE
ENOG411CQV6	0	1	0	1	0	-0.06022343815674253	0	-0.10037245284987478	0.5	0.5	-0.04258440150700132	ENOG411CQV6	147905352, 148227822, 148230501, 213625374, 23452485, Xelaev18045156m.g, Xelaev18047496m.g, Xelaev18025565m.g, Xelaev18023551m.g	GenBank, Xenbase_9.1	Xelaev18045156m.g, Xelaev18047496m.g, mkl1.S, mkl1.L	uncharacterized protein LOC779131 [Xenopus laevis], myocardin-related transcription factor A [Xenopus laevis], myocardin-related transcription factor B [Xenopus laevis], Unknown (protein for MGC:197191) [Xenopus laevis], NA	Q9ULH7, Q969V6	MRTFB, MRTFA	KIAA1243 MKL2, KIAA1438 MAL MKL1	megakaryoblastic leukemia (translocation) 1	0.5169835849976983	0.8152246282690522	FALSE	FALSE	FALSE
ENOG411CUAV	0	1	0	1	0	-0.06022343815674253	0	-0.10037245284987478	0.5	0.5	-0.04258440150700132	ENOG411CUAV	147907385, 148222629, 148238048, 213623546, 213623548, Xelaev18018362m.g, Xelaev18010844m.g, Xelaev18020505m.g	GenBank, Xenbase_9.1	mfge8.L, edil3.S, mfge8.S	MGC84194 protein precursor [Xenopus laevis], EGF-like repeats and discoidin 1-like domains 3 [Xenopus laevis], milk fat globule-EGF factor 8 protein precursor [Xenopus laevis], DEL-1 precursor [Xenopus laevis], NA	O43854, Q08431	EDIL3, MFGE8	DEL1, NA	Milk fat globule-EGF factor 8 protein	0.5169835849976983	0.8152246282690522	FALSE	FALSE	FALSE
ENOG411CYJA	0	1	0	1	0	-0.06022343815674253	0	-0.10037245284987478	0.5	0.5	-0.04258440150700132	ENOG411CYJA	11874759, 13021620, 205277333, 28958137, Xelaev18038100m.g, Xelaev18005901m.g, Xelaev18040992m.g	GenBank, Xenbase_9.1	uba1.L, uba6.L, uba1.S	ubiquitin activating enzyme [Xenopus laevis], ubiquitin-activating enzyme E1 [Xenopus laevis], ubiquitin-like modifier activating enzyme 1 [Xenopus laevis], Uba1a protein [Xenopus laevis], NA	P22314, A0AVT1, P41226	UBA1, UBA6, UBA7	A1S9T UBE1, MOP4 UBE1L2, UBE1L UBE2	Ubiquitin-like modifier activating enzyme	0.5169835849976983	0.8152246282690522	FALSE	FALSE	FALSE
ENOG411CSAT	0	1	0	1	0	-0.06022343815674253	0	-0.10037245284987478	0.5	0.5	-0.04258440150700132	ENOG411CSAT	117167933, 126631292, 148236537, 163915819, 27769413, 47507270, 49256490, 71051360, 83318253, Xelaev18012624m.g, Xelaev18004058m.g	GenBank, Xenbase_9.1	fuca1.L, loc100497659.S	LOC432087 protein [Xenopus laevis], fucosidase, alpha-L- 2, plasma precursor [Xenopus laevis], Fuca protein [Xenopus laevis], Unknown (protein for MGC:83395) [Xenopus laevis], NA	P04066, Q9BTY2	FUCA1, FUCA2	NA	fucosidase, alpha-L	0.5169835849976983	0.8152246282690522	FALSE	FALSE	FALSE
ENOG411CSGK	0	1	0	1	0	-0.06022343815674253	0	-0.10037245284987478	0.5	0.5	-0.04258440150700132	ENOG411CSGK	120538283, 172044108, Xelaev18034084m.g, Xelaev18032488m.g	GenBank, Xenbase_9.1	pycrl.S, pycrl.L	Pycrl protein [Xenopus laevis], RecName: Full=Pyrroline-5-carboxylate reductase 3; Short=P5C reductase 3; Short=P5CR 3; AltName: Full=Pyrroline-5-carboxylate reductase-like protein, NA	Q53H96	PYCR3	PYCRL	pyrroline-5-carboxylate reductase-like	0.5169835849976983	0.8152246282690522	FALSE	FALSE	FALSE
ENOG411CXVM	0	1	0	1	0	-0.06022343815674253	0	-0.10037245284987478	0.5	0.5	-0.04258440150700132	ENOG411CXVM	124481736, 147901405, 148226696, 148229933, 17384400, 28317389, 54037961, Xelaev18013586m.g, Xelaev18033334m.g, Xelaev18047251m.g, Xelaev18044799m.g, Xelaev18016050m.g	GenBank, Xenbase_9.1	Xelaev18013586m.g, pcbp2.S, loc100490531-like.S, loc100490531-like.L, Xelaev18016050m.g	LOC100037147 protein [Xenopus laevis], poly(rC) binding protein 2 [Xenopus laevis], poly(rC) binding protein 3 [Xenopus laevis], MGC84166 protein [Xenopus laevis], hnRNP-E2 protein copy b [Xenopus laevis], TPA: hnRNP-E2 b [Xenopus laevis], Pcbp2 protein [Xenopus laevis], NA	P57721	PCBP3	PCBP3-OT1 PCBP3OT	Poly(RC) binding protein	0.5169835849976983	0.8152246282690522	FALSE	FALSE	FALSE
ENOG411CVQ7	0	1	0	1	0	-0.06022343815674253	0	-0.10037245284987478	0.5	0.5	-0.04258440150700132	ENOG411CVQ7	125858602, Xelaev18008133m.g, Xelaev18010867m.g	GenBank, Xenbase_9.1	mccc2.L, mccc2.S	LOC100037195 protein [Xenopus laevis], NA	Q9HCC0	MCCC2	MCCB	methylcrotonoyl-CoA carboxylase 2 (beta)	0.5169835849976983	0.8152246282690522	FALSE	FALSE	FALSE
ENOG411DGJD	0	1	0	1	0	-0.06022343815674253	0	-0.10037245284987478	0.5	0.5	-0.04258440150700132	ENOG411DGJD	148237426, Xelaev18031842m.g, Xelaev18043561m.g, Xelaev18033591m.g, Xelaev18046284m.g	GenBank, Xenbase_9.1	ppp4r1.L, ppp4r1l.L, ppp4r1.S, ppp4r1l.S	protein phosphatase 4, regulatory subunit 1 [Xenopus laevis], NA	NA	NA	NA	phosphatase 4, regulatory subunit	0.5169835849976983	0.8152246282690522	FALSE	FALSE	FALSE
ENOG411CXHS	0	1	0	1	0	-0.06022343815674253	0	-0.10037245284987478	0.5	0.5	-0.04258440150700132	ENOG411CXHS	147901719, 32450643, 52138957, 83318199, Xelaev18043036m.g	GenBank, Xenbase_9.1	f11r.S	similar to junctional adhesion molecule 1 precursor [Xenopus laevis], LOC398627 protein [Xenopus laevis], NA	Q9Y624	F11R	JAM1 JCAM	F11 receptor	0.5169835849976983	0.8152246282690522	FALSE	FALSE	FALSE
ENOG411CQXN	0	1	0	1	0	-0.06022343815674253	0	-0.10037245284987478	0.5	0.5	-0.04258440150700132	ENOG411CQXN	134024833, 68534041, Xelaev18043197m.g, Xelaev18045955m.g	GenBank, Xenbase_9.1	npepps.L, npepps.S	LOC733291 protein [Xenopus laevis], NA	P55786	NPEPPS	PSA	aminopeptidase puromycin sensitive	0.5169835849976983	0.8152246282690522	FALSE	FALSE	FALSE
ENOG411CTQU	0	1	0	1	0	-0.06022343815674253	0	-0.10037245284987478	0.5	0.5	-0.04258440150700132	ENOG411CTQU	148231265, 29351641, 77748117, Xelaev18023586m.g	GenBank, Xenbase_9.1	sec22b.L	SEC22 vesicle trafficking protein homolog B (gene/pseudogene) [Xenopus laevis], Sec22l1b protein [Xenopus laevis], Unknown (protein for MGC:130778) [Xenopus laevis], NA	O75396	SEC22B	SEC22L1	Vesicle-trafficking protein	0.5169835849976983	0.8152246282690522	FALSE	FALSE	FALSE
ENOG411DFZM	0	1	0	1	0	-0.06022343815674253	0	-0.10037245284987478	0.5	0.5	-0.04258440150700132	ENOG411DFZM	148238203, 57920980, 90101327, Xelaev18006229m.g	GenBank, Xenbase_9.1	gamt.L	guanidinoacetate N-methyltransferase A [Xenopus laevis], Gamt-b protein [Xenopus laevis], RecName: Full=Guanidinoacetate N-methyltransferase B, NA	NA	NA	NA	Guanidinoacetate N-methyltransferase	0.5169835849976983	0.8152246282690522	FALSE	FALSE	FALSE
ENOG411CW4Z	0	1	0	1	0	-0.06022343815674253	0	-0.10037245284987478	0.5	0.5	-0.04258440150700132	ENOG411CW4Z	147901444, 148233978, Xelaev18010300m.g, Xelaev18009673m.g, Xelaev18007338m.g	GenBank, Xenbase_9.1	dnaja4.1.S, dnaja1.S, dnaja4.1.L	DnaJ (Hsp40) homolog, subfamily A, member 4, gene 1 [Xenopus laevis], DnaJ (Hsp40) homolog, subfamily A, member 1 [Xenopus laevis], NA	P31689, Q8WW22	DNAJA1, DNAJA4	DNAJ2 HDJ2 HSJ2 HSPF4, NA	DnaJ (Hsp40) homolog, subfamily A, member	0.5169835849976983	0.8152246282690522	FALSE	FALSE	FALSE
ENOG411D462	0	1	0	1	0	-0.06022343815674253	0	-0.10037245284987478	0.5	0.5	-0.04258440150700132	ENOG411D462	119226360	GenBank	NA	MGC85411 protein [Xenopus laevis]	P62312	LSM6	NA	LSM6 homolog, U6 small nuclear RNA associated (S. cerevisiae)	0.5169835849976983	0.8152246282690522	FALSE	FALSE	FALSE
ENOG411CRR4	0	1	0	1	0	-0.06022343815674253	0	-0.10037245284987478	0.5	0.5	-0.04258440150700132	ENOG411CRR4	122063392, 148232571, 169642455, 27370936, Xelaev18019533m.g, Xelaev18001027m.g	GenBank, Xenbase_9.1	srrt.L, srrt.S	LOC100037061 protein [Xenopus laevis], serrate RNA effector molecule homolog B [Xenopus laevis], LOC398542 protein [Xenopus laevis], NA	Q9BXP5	SRRT	ARS2 ASR2	serrate RNA effector molecule homolog (Arabidopsis)	0.5169835849976983	0.8152246282690522	FALSE	FALSE	FALSE
ENOG411CSHF	0	1	0	1	0	-0.06022343815674253	0	-0.10037245284987478	0.5	0.5	-0.04258440150700132	ENOG411CSHF	147902164, 148233247	GenBank	NA	transmembrane protein 30A [Xenopus laevis], uncharacterized protein LOC399053 [Xenopus laevis]	Q9NV96, Q3MIR4	TMEM30A, TMEM30B	C6orf67 CDC50A, CDC50B	Transmembrane protein 30A	0.5169835849976983	0.8152246282690522	FALSE	FALSE	FALSE
ENOG411CSS6	0	1	0	1	0	-0.06022343815674253	0	-0.10037245284987478	0.5	0.5	-0.04258440150700132	ENOG411CSS6	141796813, 47123230, 62825927, Xelaev18013595m.g, Xelaev18016058m.g	GenBank, Xenbase_9.1	espl1.L, espl1.S	Unknown (protein for IMAGE:6326691) [Xenopus laevis], LOC431925 protein [Xenopus laevis], LOC733221 protein [Xenopus laevis], NA	Q14674	ESPL1	ESP1 KIAA0165	extra spindle pole bodies homolog 1 (S. cerevisiae)	0.5169835849976983	0.8152246282690522	FALSE	FALSE	FALSE
ENOG411CZZ8	3	10	2	12	-0.30240568630540826	0.23653561206102325	-0.28497695871447104	0.14063564665392023	6.5	7	-0.04657717617546599	ENOG411CZZ8	148223905, 148224598, Xelaev18021938m.g	GenBank, Xenbase_9.1	ndufs3.L	NADH dehydrogenase (ubiquinone) Fe-S protein 3, 30kDa (NADH-coenzyme Q reductase) [Xenopus laevis], uncharacterized protein LOC495365 [Xenopus laevis], NA	O75489	NDUFS3	NA	NADH dehydrogenase (ubiquinone) Fe-S protein 3, 30kDa (NADH-coenzyme Q reductase)	0.5185748884716754	0.8152246282690522	FALSE	FALSE	FALSE
ENOG411CPX5	7	13	6	14	-0.05541194742135457	-0.02452993839002011	-0.06258453737802286	-8.36779298960177e-4	10	10	-0.05652744955806368	ENOG411CPX5	165968992, 4033762, 54038206, Xelaev18043196m.g, Xelaev18045954m.g	GenBank, Xenbase_9.1	kpnb1.L, kpnb1.S	importin beta 1 [Xenopus laevis], RecName: Full=Importin subunit beta; AltName: Full=Importin-90; AltName: Full=Karyopherin subunit beta; AltName: Full=p97, LOC495201 protein [Xenopus laevis], NA	Q14974	KPNB1	NTF97	karyopherin (importin) beta 1	0.5225391855525671	0.8152246282690522	FALSE	FALSE	FALSE
ENOG411CQQF	0	2	0	2	0	-0.08517877068950216	0	-0.10037245284987478	1	1	-0.06023048636768091	ENOG411CQQF	123895418, 148225368, Xelaev18024927m.g	GenBank, Xenbase_9.1	usp10.S	RecName: Full=Ubiquitin carboxyl-terminal hydrolase 10-A; AltName: Full=Deubiquitinating enzyme 10-A; AltName: Full=Ubiquitin thiolesterase 10-A; AltName: Full=Ubiquitin-specific-processing protease 10-A, ubiquitin carboxyl-terminal hydrolase 10-B [Xenopus laevis], NA	Q14694	USP10	KIAA0190	ubiquitin specific peptidase 10	0.5240139674132708	0.8152246282690522	FALSE	FALSE	FALSE
ENOG411CY6H	0	2	0	2	0	-0.08517877068950216	0	-0.10037245284987478	1	1	-0.06023048636768091	ENOG411CY6H	147901492, 147902111, 161611735, 161612267, 7441984	GenBank	NA	Y-box-binding protein 2-B [Xenopus laevis], Y-box-binding protein 2-A [Xenopus laevis], Csda-A protein [Xenopus laevis], FRGY2 protein [Xenopus laevis], mRNA-binding protein - African clawed frog (fragments)	Q9Y2T7	YBX2	CSDA3 MSY2	Y box binding protein 2	0.5240139674132708	0.8152246282690522	FALSE	FALSE	FALSE
ENOG411CUJ8	0	2	0	2	0	-0.08517877068950216	0	-0.10037245284987478	1	1	-0.06023048636768091	ENOG411CUJ8	148228386, 27924448, Xelaev18012993m.g	GenBank, Xenbase_9.1	txndc9.L	thioredoxin domain containing 9 [Xenopus laevis], Apacd-prov protein [Xenopus laevis], NA	O14530	TXNDC9	APACD	thioredoxin domain containing 9	0.5240139674132708	0.8152246282690522	FALSE	FALSE	FALSE
ENOG411CTPY	0	2	0	2	0	-0.08517877068950216	0	-0.10037245284987478	1	1	-0.06023048636768091	ENOG411CTPY	148229503, 213626727, 27694908	GenBank	NA	programmed cell death 6-interacting protein [Xenopus laevis], LOC398095 protein [Xenopus laevis]	Q8WUM4	PDCD6IP	AIP1 ALIX KIAA1375	Programmed cell death 6 interacting protein	0.5240139674132708	0.8152246282690522	FALSE	FALSE	FALSE
ENOG411CQC9	0	2	0	2	0	-0.08517877068950216	0	-0.10037245284987478	1	1	-0.06023048636768091	ENOG411CQC9	120538295, 147900786, 148225228, 148231047, 148233227	GenBank	NA	LOC100036940 protein [Xenopus laevis], annexin A11 [Xenopus laevis], annexin A7 [Xenopus laevis]	P20073, P50995	ANXA7, ANXA11	ANX7 SNX, ANX11	annexin A11	0.5240139674132708	0.8152246282690522	FALSE	FALSE	FALSE
ENOG411D09T	0	2	0	2	0	-0.08517877068950216	0	-0.10037245284987478	1	1	-0.06023048636768091	ENOG411D09T	148229929, Xelaev18039255m.g	GenBank, Xenbase_9.1	mvb12a.L	multivesicular body subunit 12A [Xenopus laevis], NA	Q96EY5	MVB12A	CFBP FAM125A	Family with sequence similarity 125, member A	0.5240139674132708	0.8152246282690522	FALSE	FALSE	FALSE
ENOG411CT97	0	2	0	2	0	-0.08517877068950216	0	-0.10037245284987478	1	1	-0.06023048636768091	ENOG411CT97	147898622, 147903451, 148236557, Xelaev18009486m.g	GenBank, Xenbase_9.1	g3bp2.S	GTPase activating protein (SH3 domain) binding protein 1 [Xenopus laevis], MGC80186 protein [Xenopus laevis], GTPase activating protein (SH3 domain) binding protein 2 [Xenopus laevis], NA	Q9UN86, Q13283	G3BP2, G3BP1	KIAA0660, G3BP	GTPase activating protein (SH3 domain) binding protein	0.5240139674132708	0.8152246282690522	FALSE	FALSE	FALSE
ENOG411CYWS	0	2	0	2	0	-0.08517877068950216	0	-0.10037245284987478	1	1	-0.06023048636768091	ENOG411CYWS	148233662, Xelaev18024326m.g	GenBank, Xenbase_9.1	psmd13.S	proteasome (prosome, macropain) 26S subunit, non-ATPase, 13 [Xenopus laevis], NA	Q9UNM6	PSMD13	NA	Proteasome (Prosome, macropain) 26S subunit, non-ATPase, 13	0.5240139674132708	0.8152246282690522	FALSE	FALSE	FALSE
ENOG411CQGX	0	2	0	2	0	-0.08517877068950216	0	-0.10037245284987478	1	1	-0.06023048636768091	ENOG411CQGX	147904714, 38511450, Xelaev18030017m.g	GenBank, Xenbase_9.1	pccb.S	propionyl CoA carboxylase, beta polypeptide [Xenopus laevis], MGC68650 protein [Xenopus laevis], NA	P05166	PCCB	NA	propionyl CoA carboxylase, beta polypeptide	0.5240139674132708	0.8152246282690522	FALSE	FALSE	FALSE
ENOG411CX3D	0	2	0	2	0	-0.08517877068950216	0	-0.10037245284987478	1	1	-0.06023048636768091	ENOG411CX3D	148225797, Xelaev18040780m.g, Xelaev18042893m.g	GenBank, Xenbase_9.1	ndufs2.L, ndufs2.S	NADH dehydrogenase (ubiquinone) Fe-S protein 2, 49kDa (NADH-coenzyme Q reductase) [Xenopus laevis], NA	O75306	NDUFS2	NA	NADH dehydrogenase (Ubiquinone) Fe-S protein 2, 49kDa (NADH-coenzyme Q reductase)	0.5240139674132708	0.8152246282690522	FALSE	FALSE	FALSE
ENOG411CSVU	0	2	0	2	0	-0.08517877068950216	0	-0.10037245284987478	1	1	-0.06023048636768091	ENOG411CSVU	148226240, Xelaev18023676m.g	GenBank, Xenbase_9.1	adsl.L	adenylosuccinate lyase [Xenopus laevis], NA	P30566	ADSL	AMPS	adenylosuccinate lyase	0.5240139674132708	0.8152246282690522	FALSE	FALSE	FALSE
ENOG411CVDK	0	2	0	2	0	-0.08517877068950216	0	-0.10037245284987478	1	1	-0.06023048636768091	ENOG411CVDK	1002598, 109940097, 148236609, 311819824, 64613, Xelaev18033701m.g	GenBank, Xenbase_9.1	mcm4.S	Cdc21 [Xenopus laevis], RecName: Full=DNA replication licensing factor mcm4-B; AltName: Full=CDC21 homolog-B; AltName: Full=Minichromosome maintenance protein 4-B; Short=xMCM4-B; AltName: Full=P1-CDC21-B, DNA replication licensing factor mcm4-A [Xenopus laevis], unnamed protein product [Xenopus laevis], S.pombe cdc21+ homologue [Xenopus laevis], NA	P33991	MCM4	CDC21	Minichromosome maintenance complex component 4	0.5240139674132708	0.8152246282690522	FALSE	FALSE	FALSE
ENOG411D1XK	0	2	0	2	0	-0.08517877068950216	0	-0.10037245284987478	1	1	-0.06023048636768091	ENOG411D1XK	148236013, Xelaev18023422m.g	GenBank, Xenbase_9.1	rtca.L	RNA terminal phosphate cyclase domain 1 [Xenopus laevis], NA	O00442	RTCA	RPC RPC1 RTC1 RTCD1	RNA 3'-terminal phosphate cyclase	0.5240139674132708	0.8152246282690522	FALSE	FALSE	FALSE
ENOG411CWPF	0	2	0	2	0	-0.08517877068950216	0	-0.10037245284987478	1	1	-0.06023048636768091	ENOG411CWPF	148227480, 148228392, 28278283, Xelaev18028769m.g, Xelaev18026124m.g	GenBank, Xenbase_9.1	epcam.S, epcam.L	epithelial cell adhesion molecule precursor [Xenopus laevis], epithelial cell adhesion molecule [Xenopus laevis], MGC54031 protein [Xenopus laevis], NA	P16422, P09758	EPCAM, TACSTD2	GA733-2 M1S2 M4S1 MIC18 TACSTD1 TROP1, GA733-1 M1S1 TROP2	Epithelial cell adhesion molecule	0.5240139674132708	0.8152246282690522	FALSE	FALSE	FALSE
ENOG411CWF6	0	2	0	2	0	-0.08517877068950216	0	-0.10037245284987478	1	1	-0.06023048636768091	ENOG411CWF6	120538449, 161611708, Xelaev18013856m.g, Xelaev18008643m.g, Xelaev18016318m.g, Xelaev18041398m.g, Xelaev18018852m.g, Xelaev18018855m.g, Xelaev18018858m.g, Xelaev18018853m.g, Xelaev18018854m.g, Xelaev18038156m.g, Xelaev18018856m.g, Xelaev18018857m.g, Xelaev18020142m.g	GenBank, Xenbase_9.1	endod1.L, loc101731854.L, endod1.S, loc100145419.S, Xelaev18018852m.g, Xetrov90009468m.L, loc100490929-like.1.L, Xelaev18018853m.g, loc100490587.L, loc100145419.L, loc780277.L, loc100488296.L, loc100490587.S	LOC100127285 protein [Xenopus laevis], NA	O94919	ENDOD1	KIAA0830	Endonuclease domain containing 1	0.5240139674132708	0.8152246282690522	FALSE	FALSE	FALSE
ENOG411CUGV	0	2	0	2	0	-0.08517877068950216	0	-0.10037245284987478	1	1	-0.06023048636768091	ENOG411CUGV	147900315, 148226428, 196049604, 196049609, 218526904	GenBank	NA	malectin-B precursor [Xenopus laevis], malectin-A precursor [Xenopus laevis], Chain A, Malectin, Chain A, Xenopus Laevis Malectin Complexed With Nigerose (Glcalpha1- 3glc), RecName: Full=Malectin-B; Flags: Precursor	Q14165	MLEC	KIAA0152	malectin	0.5240139674132708	0.8152246282690522	FALSE	FALSE	FALSE
ENOG411D0DG	0	2	0	2	0	-0.08517877068950216	0	-0.10037245284987478	1	1	-0.06023048636768091	ENOG411D0DG	147906063, 148230983, Xelaev18030618m.g, Xelaev18032786m.g	GenBank, Xenbase_9.1	gars.L, gars.S	hypothetical protein LOC734988 [Xenopus laevis], glycyl-tRNA synthetase [Xenopus laevis], NA	P41250	GARS	NA	Glycyl-tRNA synthetase	0.5240139674132708	0.8152246282690522	FALSE	FALSE	FALSE
ENOG411CQDS	0	2	0	2	0	-0.08517877068950216	0	-0.10037245284987478	1	1	-0.06023048636768091	ENOG411CQDS	32442466, Xelaev18012544m.g, Xelaev18015216m.g, Xelaev18027374m.g, Xelaev18029483m.g	GenBank, Xenbase_9.1	khdrbs1.L, khdrbs1.S, khdrbs2.L, khdrbs2.S	KH domain RNA-binding protein Sam68 [Xenopus laevis], NA	Q07666, Q5VWX1	KHDRBS1, KHDRBS2	SAM68, SLM1	KH domain containing, RNA binding, signal transduction associated	0.5240139674132708	0.8152246282690522	FALSE	FALSE	FALSE
ENOG411CQWV	0	2	0	2	0	-0.08517877068950216	0	-0.10037245284987478	1	1	-0.06023048636768091	ENOG411CQWV	148227014, 27469646, Xelaev18010558m.g, Xelaev18007716m.g	GenBank, Xenbase_9.1	pgam5.S, pgam5.L	serine/threonine-protein phosphatase PGAM5, mitochondrial [Xenopus laevis], LOC398484 protein [Xenopus laevis], NA	Q96HS1	PGAM5	NA	phosphoglycerate mutase family member 5	0.5240139674132708	0.8152246282690522	FALSE	FALSE	FALSE
ENOG411CU4J	0	2	0	2	0	-0.08517877068950216	0	-0.10037245284987478	1	1	-0.06023048636768091	ENOG411CU4J	111598428, Xelaev18001044m.g, Xelaev18003271m.g, Xelaev18029591m.g	GenBank, Xenbase_9.1	slc12a9.S, loc100498108-like.L, loc100498108-like.S	Slc12a9 protein [Xenopus laevis], NA	Q9BXP2	SLC12A9	CCC6 CIP1	solute carrier family 12 (potassium chloride transporters), member 9	0.5240139674132708	0.8152246282690522	FALSE	FALSE	FALSE
ENOG411CXFT	0	2	0	2	0	-0.08517877068950216	0	-0.10037245284987478	1	1	-0.06023048636768091	ENOG411CXFT	148233806, Xelaev18008343m.g, Xelaev18008344m.g	GenBank, Xenbase_9.1	Xelaev18008343m.g, c9.L	complement component 9 precursor [Xenopus laevis], NA	P02748	C9	NA	Complement component 9	0.5240139674132708	0.8152246282690522	FALSE	FALSE	FALSE
ENOG411CSUR	0	2	0	2	0	-0.08517877068950216	0	-0.10037245284987478	1	1	-0.06023048636768091	ENOG411CSUR	112419230, 148222005, 49119460, Xelaev18017489m.g	GenBank, Xenbase_9.1	metap2.L	LOC443662 protein [Xenopus laevis], methionine aminopeptidase 2 [Xenopus laevis], NA	P50579	METAP2	MNPEP P67EIF2	Removes the N-terminal methionine from nascent proteins (By similarity)	0.5240139674132708	0.8152246282690522	FALSE	FALSE	FALSE
ENOG411CQAC	0	2	0	2	0	-0.08517877068950216	0	-0.10037245284987478	1	1	-0.06023048636768091	ENOG411CQAC	147902653	GenBank	NA	proteasome (prosome, macropain) 26S subunit, non-ATPase, 14 [Xenopus laevis]	O00487	PSMD14	POH1	proteasome (prosome, macropain) 26S subunit, non-ATPase, 14	0.5240139674132708	0.8152246282690522	FALSE	FALSE	FALSE
ENOG411D31U	0	2	0	2	0	-0.08517877068950216	0	-0.10037245284987478	1	1	-0.06023048636768091	ENOG411D31U	115528688, Xelaev18035734m.g	GenBank, Xenbase_9.1	mrps16.L	LOC100158393 protein [Xenopus laevis], NA	Q9Y3D3	MRPS16	RPMS16	Mitochondrial ribosomal protein S16	0.5240139674132708	0.8152246282690522	FALSE	FALSE	FALSE
ENOG411CYCE	0	2	0	2	0	-0.08517877068950216	0	-0.10037245284987478	1	1	-0.06023048636768091	ENOG411CYCE	109940096, 148235010, 311819912, 868012	GenBank	NA	RecName: Full=Maternal DNA replication licensing factor mcm3; AltName: Full=Maternal minichromosome maintenance protein 3; Short=mMCM3; Short=xMCM3; AltName: Full=P1 homolog; AltName: Full=XRLF subunit beta; AltName: Full=p100, zygotic DNA replication licensing factor mcm3 [Xenopus laevis], unnamed protein product [Xenopus laevis], xRlf beta subunit (p100 protein) [Xenopus laevis]	P25205	MCM3	NA	Minichromosome maintenance complex component 3	0.5240139674132708	0.8152246282690522	FALSE	FALSE	FALSE
ENOG411D281	0	2	0	2	0	-0.08517877068950216	0	-0.10037245284987478	1	1	-0.06023048636768091	ENOG411D281	Xelaev18014822m.g	Xenbase_9.1	mkrn3.S	NA	NA	NA	NA	Zinc finger, C3HC4 type (RING finger)	0.5240139674132708	0.8152246282690522	FALSE	FALSE	FALSE
ENOG411DEXC	0	2	0	2	0	-0.08517877068950216	0	-0.10037245284987478	1	1	-0.06023048636768091	ENOG411DEXC	13021638, 148235537, 67677974, 83318265	GenBank	NA	RNA-binding protein EWS [Xenopus laevis], uncharacterized protein LOC734969 [Xenopus laevis], LOC733270 protein [Xenopus laevis], Unknown (protein for MGC:132193) [Xenopus laevis]	NA	NA	NA	Ewing sarcoma breakpoint region 1	0.5240139674132708	0.8152246282690522	FALSE	FALSE	FALSE
ENOG411D3CU	0	2	0	2	0	-0.08517877068950216	0	-0.10037245284987478	1	1	-0.06023048636768091	ENOG411D3CU	146327490, 148236968, 47682838, Xelaev18039585m.g, Xelaev18041284m.g	GenBank, Xenbase_9.1	glrx5.L, glrx5.S	Unknown (protein for MGC:160815) [Xenopus laevis], glutaredoxin 5 [Xenopus laevis], Grx5-prov protein [Xenopus laevis], NA	Q86SX6	GLRX5	C14orf87	glutaredoxin 5	0.5240139674132708	0.8152246282690522	FALSE	FALSE	FALSE
ENOG411CZAX	0	2	0	2	0	-0.08517877068950216	0	-0.10037245284987478	1	1	-0.06023048636768091	ENOG411CZAX	148227293, Xelaev18047213m.g	GenBank, Xenbase_9.1	kiaa1715.S	protein lunapark [Xenopus laevis], NA	Q9C0E8	LNPK	KIAA1715 LNP	kiaa1715	0.5240139674132708	0.8152246282690522	FALSE	FALSE	FALSE
ENOG411CZAR	0	2	0	2	0	-0.08517877068950216	0	-0.10037245284987478	1	1	-0.06023048636768091	ENOG411CZAR	148235981, Xelaev18015215m.g	GenBank, Xenbase_9.1	eif3i.S	eukaryotic translation initiation factor 3 subunit I [Xenopus laevis], NA	Q13347	EIF3I	EIF3S2 TRIP1	Component of the eukaryotic translation initiation factor 3 (eIF-3) complex, which is required for several steps in the initiation of protein synthesis. The eIF-3 complex associates with the 40S ribosome and facilitates the recruitment of eIF-1, eIF-1A, eIF-2 GTP methionyl-tRNAi and eIF-5 to form the 43S preinitiation complex (43S PIC). The eIF-3 complex stimulates mRNA recruitment to the 43S PIC…	0.5240139674132708	0.8152246282690522	FALSE	FALSE	FALSE
ENOG411CY52	0	2	0	2	0	-0.08517877068950216	0	-0.10037245284987478	1	1	-0.06023048636768091	ENOG411CY52	147902718, Xelaev18015572m.g	GenBank, Xenbase_9.1	gtpbp6.S	putative GTP-binding protein 6 [Xenopus laevis], NA	O43824	GTPBP6	PGPL	GTP binding protein 6	0.5240139674132708	0.8152246282690522	FALSE	FALSE	FALSE
ENOG411D0BQ	0	2	0	2	0	-0.08517877068950216	0	-0.10037245284987478	1	1	-0.06023048636768091	ENOG411D0BQ	148228541, 148228545, 1753195	GenBank	NA	DNA replication licensing factor mcm5-A [Xenopus laevis], DNA replication licensing factor mcm5-B [Xenopus laevis], xCDC46 [Xenopus laevis]	P33992	MCM5	CDC46	Minichromosome maintenance complex component 5	0.5240139674132708	0.8152246282690522	FALSE	FALSE	FALSE
ENOG411CYYH	0	2	0	2	0	-0.08517877068950216	0	-0.10037245284987478	1	1	-0.06023048636768091	ENOG411CYYH	148232688, 27370871, 49119281, Xelaev18034881m.g	GenBank, Xenbase_9.1	nolc1.L	nucleolar and coiled-body phosphoprotein 1 [Xenopus laevis], XNopp180 protein [Xenopus laevis], NA	Q14978	NOLC1	KIAA0035 NS5ATP13	nucleolar and coiled-body phosphoprotein 1	0.5240139674132708	0.8152246282690522	FALSE	FALSE	FALSE
ENOG411CSSF	0	2	0	2	0	-0.08517877068950216	0	-0.10037245284987478	1	1	-0.06023048636768091	ENOG411CSSF	148227105, Xelaev18033716m.g	GenBank, Xenbase_9.1	atp6v1h.S	ATPase, H+ transporting, lysosomal 50/57kDa, V1 subunit H [Xenopus laevis], NA	Q9UI12	ATP6V1H	NA	ATPase, H transporting, lysosomal 50 57kDa, V1 subunit H	0.5240139674132708	0.8152246282690522	FALSE	FALSE	FALSE
ENOG411CY25	0	2	0	2	0	-0.08517877068950216	0	-0.10037245284987478	1	1	-0.06023048636768091	ENOG411CY25	148233982	GenBank	NA	electron-transferring-flavoprotein dehydrogenase [Xenopus laevis]	Q16134	ETFDH	NA	electron-transferring-flavoprotein dehydrogenase	0.5240139674132708	0.8152246282690522	FALSE	FALSE	FALSE
ENOG411CPPZ	0	2	0	2	0	-0.08517877068950216	0	-0.10037245284987478	1	1	-0.06023048636768091	ENOG411CPPZ	147906709	GenBank	NA	short-chain acyl-CoA dehydrogenase [Xenopus laevis]	P16219	ACADS	NA	acyl-CoA dehydrogenase, C-2 to C-3 short chain	0.5240139674132708	0.8152246282690522	FALSE	FALSE	FALSE
ENOG411CTJV	0	2	0	2	0	-0.08517877068950216	0	-0.10037245284987478	1	1	-0.06023048636768091	ENOG411CTJV	113825, 148226262, 227525, 62740097	GenBank	NA	RecName: Full=Putative ATP-dependent RNA helicase an3, DEAD (Asp-Glu-Ala-Asp) box polypeptide 3, X-linked [Xenopus laevis], ATP dependent RNA helicase, Unknown (protein for MGC:115016) [Xenopus laevis]	O00571, O15523	DDX3X, DDX3Y	DBX DDX3, DBY	DEAD (Asp-Glu-Ala-Asp) box polypeptide 3	0.5240139674132708	0.8152246282690522	FALSE	FALSE	FALSE
ENOG411CZU7	0	2	0	2	0	-0.08517877068950216	0	-0.10037245284987478	1	1	-0.06023048636768091	ENOG411CZU7	147901681, 148225510, Xelaev18035380m.g	GenBank, Xenbase_9.1	trim29.L	tripartite motif containing 29 [Xenopus laevis], MGC80203 protein [Xenopus laevis], NA	Q14134	TRIM29	ATDC	tripartite motif containing 29	0.5240139674132708	0.8152246282690522	FALSE	FALSE	FALSE
ENOG411CTZX	0	2	0	2	0	-0.08517877068950216	0	-0.10037245284987478	1	1	-0.06023048636768091	ENOG411CTZX	148223712, 148232224, Xelaev18041037m.g	GenBank, Xenbase_9.1	psma6.S	proteasome alpha 6 subunit [Xenopus laevis], uncharacterized protein LOC495277 [Xenopus laevis], NA	P60900	PSMA6	PROS27	The proteasome is a multicatalytic proteinase complex which is characterized by its ability to cleave peptides with Arg, Phe, Tyr, Leu, and Glu adjacent to the leaving group at neutral or slightly basic pH. The proteasome has an ATP-dependent proteolytic activity	0.5240139674132708	0.8152246282690522	FALSE	FALSE	FALSE
ENOG411CZ5H	0	2	0	2	0	-0.08517877068950216	0	-0.10037245284987478	1	1	-0.06023048636768091	ENOG411CZ5H	147900387, 148223601	GenBank	NA	coiled-coil domain-containing protein 124-B [Xenopus laevis], coiled-coil domain-containing protein 124-A [Xenopus laevis]	Q96CT7	CCDC124	NA	coiled-coil domain containing 124	0.5240139674132708	0.8152246282690522	FALSE	FALSE	FALSE
ENOG411CQJC	0	2	0	2	0	-0.08517877068950216	0	-0.10037245284987478	1	1	-0.06023048636768091	ENOG411CQJC	148231271	GenBank	NA	aldehyde dehydrogenase 9 family, member A1 [Xenopus laevis]	P49189	ALDH9A1	ALDH4 ALDH7 ALDH9	Aldehyde dehydrogenase 9 family, member A1	0.5240139674132708	0.8152246282690522	FALSE	FALSE	FALSE
ENOG411D45U	0	2	0	2	0	-0.08517877068950216	0	-0.10037245284987478	1	1	-0.06023048636768091	ENOG411D45U	148223615, Xelaev18008060m.g, Xelaev18010812m.g	GenBank, Xenbase_9.1	glrx.L, glrx.S	glutaredoxin (thioltransferase) [Xenopus laevis], NA	P35754	GLRX	GRX	glutaredoxin (thioltransferase)	0.5240139674132708	0.8152246282690522	FALSE	FALSE	FALSE
ENOG411CTB9	0	2	0	2	0	-0.08517877068950216	0	-0.10037245284987478	1	1	-0.06023048636768091	ENOG411CTB9	147906037, 148236507, 148236741, Xelaev18034803m.g, Xelaev18009114m.g	GenBank, Xenbase_9.1	pdlim1.L, Xelaev18009114m.g	similar to PDZ and LIM domain 1 (elfin) [Xenopus laevis], PDZ and LIM domain protein 3 [Xenopus laevis], PDZ and LIM domain 1 [Xenopus laevis], NA	O00151, Q53GG5	PDLIM1, PDLIM3	CLIM1 CLP36, ALP	PDZ and LIM domain	0.5240139674132708	0.8152246282690522	FALSE	FALSE	FALSE
ENOG411CRRX	0	2	0	2	0	-0.08517877068950216	0	-0.10037245284987478	1	1	-0.06023048636768091	ENOG411CRRX	115528298, Xelaev18039843m.g, Xelaev18041105m.g	GenBank, Xenbase_9.1	ktn1.L, ktn1.S	LOC100158371 protein [Xenopus laevis], NA	Q86UP2	KTN1	CG1 KIAA0004	kinectin 1 (kinesin receptor)	0.5240139674132708	0.8152246282690522	FALSE	FALSE	FALSE
ENOG411CR5V	0	2	0	2	0	-0.08517877068950216	0	-0.10037245284987478	1	1	-0.06023048636768091	ENOG411CR5V	147905009, 213627667, 51703522, Xelaev18005328m.g	GenBank, Xenbase_9.1	pcm1.L	pericentriolar material 1 protein [Xenopus laevis], Pcm-1 protein [Xenopus laevis], NA	Q15154	PCM1	NA	Pericentriolar material 1	0.5240139674132708	0.8152246282690522	FALSE	FALSE	FALSE
ENOG411CVXN	0	2	0	2	0	-0.08517877068950216	0	-0.10037245284987478	1	1	-0.06023048636768091	ENOG411CVXN	148230052, 148231518, Xelaev18036067m.g	GenBank, Xenbase_9.1	akt1s1.L	hypothetical protein LOC495075 [Xenopus laevis], AKT1 substrate 1 (proline-rich) [Xenopus laevis], NA	Q96B36	AKT1S1	PRAS40	AKT1 substrate 1 (Proline-rich)	0.5240139674132708	0.8152246282690522	FALSE	FALSE	FALSE
ENOG411CP4V	0	2	0	2	0	-0.08517877068950216	0	-0.10037245284987478	1	1	-0.06023048636768091	ENOG411CP4V	120577623, Xelaev18024202m.g, Xelaev18022257m.g, Xelaev18040030m.g	GenBank, Xenbase_9.1	ganab.S, ganab.L, ganc.L	LOC100037025 protein [Xenopus laevis], NA	A0A1W2PQD3, Q8TET4, Q14697	NA, GANC, GANAB	NA, G2AN KIAA0088	Glucosidase, alpha	0.5240139674132708	0.8152246282690522	FALSE	FALSE	FALSE
ENOG411D3RP	0	2	0	2	0	-0.08517877068950216	0	-0.10037245284987478	1	1	-0.06023048636768091	ENOG411D3RP	163916502	GenBank	NA	LOC100137631 protein [Xenopus laevis]	Q9NPJ3	ACOT13	THEM2	Acyl-CoA thioesterase 13	0.5240139674132708	0.8152246282690522	FALSE	FALSE	FALSE
ENOG411CQGQ	0	2	0	2	0	-0.08517877068950216	0	-0.10037245284987478	1	1	-0.06023048636768091	ENOG411CQGQ	148227074, 148232447, 148237771, 343479677, Xelaev18025189m.g	GenBank, Xenbase_9.1	prdx1.S	peroxiredoxin 2 [Xenopus laevis], uncharacterized protein LOC432262 [Xenopus laevis], peroxiredoxin 1 [Xenopus laevis], NA	Q06830, P32119	PRDX1, PRDX2	PAGA PAGB TDPX2, NKEFB TDPX1	Peroxiredoxin	0.5240139674132708	0.8152246282690522	FALSE	FALSE	FALSE
ENOG411D3KH	0	2	0	2	0	-0.08517877068950216	0	-0.10037245284987478	1	1	-0.06023048636768091	ENOG411D3KH	148235050, 148236386	GenBank	NA	uncharacterized protein LOC734668 [Xenopus laevis], uncharacterized protein LOC432038 [Xenopus laevis]	NA	NA	NA	Finkel-Biskis-Reilly murine sarcoma virus (FBR-MuSV) ubiquitously expressed	0.5240139674132708	0.8152246282690522	FALSE	FALSE	FALSE
ENOG411CRZM	0	2	0	2	0	-0.08517877068950216	0	-0.10037245284987478	1	1	-0.06023048636768091	ENOG411CRZM	148234841, Xelaev18015664m.g, Xelaev18013138m.g, Xelaev18027990m.g	GenBank, Xenbase_9.1	uggt2.S, uggt2.L, uggt1-like.L	UDP-glucose glycoprotein glucosyltransferase 1 [Xenopus laevis], NA	Q9NYU2, Q9NYU1	UGGT1, UGGT2	GT UGCGL1 UGGT UGT1 UGTR, UGCGL2 UGT2	UDP-glucose glycoprotein glucosyltransferase	0.5240139674132708	0.8152246282690522	FALSE	FALSE	FALSE
ENOG411CSZR	0	2	0	2	0	-0.08517877068950216	0	-0.10037245284987478	1	1	-0.06023048636768091	ENOG411CSZR	147902282, 148235709, Xelaev18020891m.g, Xelaev18017879m.g	GenBank, Xenbase_9.1	chchd3.S, chchd3.L	uncharacterized protein LOC379142 [Xenopus laevis], coiled-coil-helix-coiled-coil-helix domain containing 3 [Xenopus laevis], NA	Q9NX63	CHCHD3	MIC19 MINOS3	coiled-coil-helix-coiled-coil-helix domain containing 3	0.5240139674132708	0.8152246282690522	FALSE	FALSE	FALSE
ENOG411D0SV	0	2	0	2	0	-0.08517877068950216	0	-0.10037245284987478	1	1	-0.06023048636768091	ENOG411D0SV	148226110, 148228821	GenBank	NA	MGC80147 protein [Xenopus laevis], tRNA methyltransferase 6 homolog [Xenopus laevis]	Q9UJA5	TRMT6	KIAA1153 TRM6	tRNA methyltransferase 6 homolog (S. cerevisiae)	0.5240139674132708	0.8152246282690522	FALSE	FALSE	FALSE
ENOG411CW9G	0	2	0	2	0	-0.08517877068950216	0	-0.10037245284987478	1	1	-0.06023048636768091	ENOG411CW9G	Xelaev18015066m.g, Xelaev18012108m.g, Xelaev18002431m.g, Xelaev18002447m.g, Xelaev18026803m.g, Xelaev18029045m.g	Xenbase_9.1	Xelaev18015066m.g, Xelaev18012108m.g, Xelaev18002431m.g, Xelaev18002447m.g, arid1b.L, arid1b.S	NA	Q8NFD5	ARID1B	BAF250B DAN15 KIAA1235 OSA2	At rich interactive domain	0.5240139674132708	0.8152246282690522	FALSE	FALSE	FALSE
ENOG411D28G	0	2	0	2	0	-0.08517877068950216	0	-0.10037245284987478	1	1	-0.06023048636768091	ENOG411D28G	160420151, Xelaev18003759m.g	GenBank, Xenbase_9.1	tomm20.S	mitochondrial import receptor subunit TOM20 homolog [Xenopus laevis], NA	Q15388	TOMM20	KIAA0016	translocase of outer mitochondrial membrane 20 homolog (yeast)	0.5240139674132708	0.8152246282690522	FALSE	FALSE	FALSE
ENOG411DDJV	0	2	0	2	0	-0.08517877068950216	0	-0.10037245284987478	1	1	-0.06023048636768091	ENOG411DDJV	120538008, 147901476, 51593482, 71679806, Xelaev18027340m.g, Xelaev18029511m.g, Xelaev18027341m.g	GenBank, Xenbase_9.1	gsta1.L, gsta1.S, gsta4.L	LOC100036921 protein [Xenopus laevis], glutathione S-transferase alpha 4 [Xenopus laevis], LOC446920 protein [Xenopus laevis], Unknown (protein for MGC:114977) [Xenopus laevis], NA	NA	NA	NA	Glutathione S-transferase	0.5240139674132708	0.8152246282690522	FALSE	FALSE	FALSE
ENOG411CQI4	0	2	0	2	0	-0.08517877068950216	0	-0.10037245284987478	1	1	-0.06023048636768091	ENOG411CQI4	148230098	GenBank	NA	adaptor-related protein complex 2, mu 1 subunit [Xenopus laevis]	Q96CW1	AP2M1	CLAPM1 KIAA0109	Adaptor-related protein complex 2, mu 1 subunit	0.5240139674132708	0.8152246282690522	FALSE	FALSE	FALSE
ENOG411CZBG	0	2	0	2	0	-0.08517877068950216	0	-0.10037245284987478	1	1	-0.06023048636768091	ENOG411CZBG	116063448, 27881785, 49118598, 80479465	GenBank	NA	LOC398450 protein [Xenopus laevis]	Q13630	TSTA3	SDR4E1	Tissue specific transplantation antigen P35B	0.5240139674132708	0.8152246282690522	FALSE	FALSE	FALSE
ENOG411D0B0	0	2	0	2	0	-0.08517877068950216	0	-0.10037245284987478	1	1	-0.06023048636768091	ENOG411D0B0	147903793, 148223401	GenBank	NA	uncharacterized protein LOC735154 [Xenopus laevis], tetraspanin 3 [Xenopus laevis]	O60637	TSPAN3	TM4SF8	tetraspanin 3	0.5240139674132708	0.8152246282690522	FALSE	FALSE	FALSE
ENOG411CY30	0	2	0	2	0	-0.08517877068950216	0	-0.10037245284987478	1	1	-0.06023048636768091	ENOG411CY30	148228420, 28422157, Xelaev18003366m.g, Xelaev18000373m.g, Xelaev18003528m.g	GenBank, Xenbase_9.1	Xelaev18003366m.g, Xelaev18000373m.g, Xelaev18003528m.g	similar to nucleoporin 214kDa [Xenopus laevis], MGC52541 protein [Xenopus laevis], NA	P35658	NUP214	CAIN CAN KIAA0023	nucleoporin 214kDa	0.5240139674132708	0.8152246282690522	FALSE	FALSE	FALSE
ENOG411CSPU	3	11	2	13	-0.30240568630540826	0.20908474381581085	-0.28497695871447104	0.12201996848657304	7	7.5	-0.06598787126111413	ENOG411CSPU	148237794, Xelaev18039112m.g	GenBank, Xenbase_9.1	rps5.L	ribosomal protein S5 [Xenopus laevis], NA	P46782	RPS5	NA	Ribosomal protein S5	0.526306259130389	0.8152246282690522	FALSE	FALSE	FALSE
ENOG411CUAG	0	3	0	3	0	-0.10433447470007592	0	-0.10037245284987478	1.5	1.5	-0.07377561457195995	ENOG411CUAG	147899113, Xelaev18022090m.g, Xelaev18024292m.g, Xelaev18037902m.g, Xelaev18036192m.g	GenBank, Xenbase_9.1	ap2a2.L, ap2a2.S, ap2a1.S, ap2a1.L	adaptor-related protein complex 2, alpha 2 subunit [Xenopus laevis], NA	O94973, O95782	AP2A2, AP2A1	ADTAB CLAPA2 HIP9 HYPJ KIAA0899, ADTAA CLAPA1	Adaptor-related protein complex 2, alpha	0.5294055345559974	0.8152246282690522	FALSE	FALSE	FALSE
ENOG411CW6A	0	3	0	3	0	-0.10433447470007592	0	-0.10037245284987478	1.5	1.5	-0.07377561457195995	ENOG411CW6A	148225468, 28278099, 49258183, Xelaev18041232m.g, Xelaev18039641m.g	GenBank, Xenbase_9.1	psmc6.S, psmc6.L	proteasome (prosome, macropain) 26S subunit, ATPase, 6 [Xenopus laevis], Psmc6 protein [Xenopus laevis], NA	P62333	PSMC6	SUG2	Proteasome (Prosome, macropain) 26S subunit, ATPase, 6	0.5294055345559974	0.8152246282690522	FALSE	FALSE	FALSE
ENOG411D0AM	0	3	0	3	0	-0.10433447470007592	0	-0.10037245284987478	1.5	1.5	-0.07377561457195995	ENOG411D0AM	Xelaev18033597m.g, Xelaev18031837m.g	Xenbase_9.1	ndufv2.S, ndufv2.L	NA	P19404	NDUFV2	NA	NADH dehydrogenase ubiquinone flavoprotein 2	0.5294055345559974	0.8152246282690522	FALSE	FALSE	FALSE
ENOG411CUIE	0	3	0	3	0	-0.10433447470007592	0	-0.10037245284987478	1.5	1.5	-0.07377561457195995	ENOG411CUIE	259016334, 308153307, Xelaev18005268m.g, Xelaev18009046m.g	GenBank, Xenbase_9.1	ociad1.L, ociad1.S	RecName: Full=OCIA domain-containing protein 1, OCIA domain containing 1 [Xenopus laevis], NA	Q9NX40	OCIAD1	ASRIJ OCIA	OCIA domain containing 1	0.5294055345559974	0.8152246282690522	FALSE	FALSE	FALSE
ENOG411CUII	0	3	0	3	0	-0.10433447470007592	0	-0.10037245284987478	1.5	1.5	-0.07377561457195995	ENOG411CUII	148225538, Xelaev18011887m.g	GenBank, Xenbase_9.1	ywhae.L	tyrosine 3-monooxygenase/tryptophan 5-monooxygenase activation protein, epsilon polypeptide [Xenopus laevis], NA	P62258	YWHAE	NA	tyrosine 3-monooxygenase tryptophan 5-monooxygenase activation protein, epsilon polypeptide	0.5294055345559974	0.8152246282690522	FALSE	FALSE	FALSE
ENOG411CW6K	0	3	0	3	0	-0.10433447470007592	0	-0.10037245284987478	1.5	1.5	-0.07377561457195995	ENOG411CW6K	Xelaev18004223m.g	Xenbase_9.1	gba2.S	NA	Q9HCG7	GBA2	KIAA1605 SPG46	Non-lysosomal glucosylceramidase that catalyzes the conversion of glucosylceramide to free glucose and ceramide (By similarity)	0.5294055345559974	0.8152246282690522	FALSE	FALSE	FALSE
ENOG411CTJ6	0	4	0	4	0	-0.12048918043337997	0	-0.1003724528498746	2	2	-0.08519871654405245	ENOG411CTJ6	148226749, 148229563	GenBank	NA	insulin-like growth factor 2 mRNA-binding protein 3-A [Xenopus laevis], insulin-like growth factor 2 mRNA-binding protein 3-B [Xenopus laevis]	Q9NZI8, O00425, Q9Y6M1	IGF2BP1, IGF2BP3, IGF2BP2	CRDBP VICKZ1 ZBP1, IMP3 KOC1 VICKZ3, IMP2 VICKZ2	insulin-like growth factor 2 mRNA binding protein	0.5339482945387944	0.8152246282690522	FALSE	FALSE	FALSE
ENOG411DGCI	0	4	0	4	0	-0.12048918043337997	0	-0.1003724528498746	2	2	-0.08519871654405245	ENOG411DGCI	147900845, 148227818, Xelaev18021144m.g	GenBank, Xenbase_9.1	csrp2.S	cysteine and glycine-rich protein 2 [Xenopus laevis], NA	NA	NA	NA	Cysteine and glycine-rich protein 2	0.5339482945387944	0.8152246282690522	FALSE	FALSE	FALSE
ENOG411CXBR	0	4	0	4	0	-0.12048918043337997	0	-0.1003724528498746	2	2	-0.08519871654405245	ENOG411CXBR	147904018, 148234340	GenBank	NA	uncharacterized protein LOC494703 [Xenopus laevis], ATP synthase, H+ transporting, mitochondrial F0 complex, subunit B1 [Xenopus laevis]	NA	NA	NA	ATP synthase, H transporting, mitochondrial Fo complex, subunit B1	0.5339482945387944	0.8152246282690522	FALSE	FALSE	FALSE
ENOG411CWUV	0	4	0	4	0	-0.12048918043337997	0	-0.1003724528498746	2	2	-0.08519871654405245	ENOG411CWUV	147905658, Xelaev18024157m.g, Xelaev18033797m.g	GenBank, Xenbase_9.1	Xelaev18024157m.g, Xelaev18033797m.g	ribosomal protein L7 [Xenopus laevis], NA	P18124	RPL7	NA	Ribosomal protein L7	0.5339482945387944	0.8152246282690522	FALSE	FALSE	FALSE
ENOG411CZDC	0	4	0	4	0	-0.12048918043337997	0	-0.1003724528498746	2	2	-0.08519871654405245	ENOG411CZDC	108935850, 147898891, 1753193, Xelaev18025893m.g	GenBank, Xenbase_9.1	mcm2.S	RecName: Full=DNA replication licensing factor mcm2; AltName: Full=BM28-homolog; AltName: Full=Minichromosome maintenance protein 2; Short=xMCM2; AltName: Full=p112, DNA replication licensing factor mcm2 [Xenopus laevis], xMCM2 [Xenopus laevis], NA	P49736	MCM2	BM28 CCNL1 CDCL1 KIAA0030	Minichromosome maintenance complex component 2	0.5339482945387944	0.8152246282690522	FALSE	FALSE	FALSE
ENOG411CSU0	0	4	0	4	0	-0.12048918043337997	0	-0.1003724528498746	2	2	-0.08519871654405245	ENOG411CSU0	148233255, Xelaev18039448m.g	GenBank, Xenbase_9.1	dlst.L	dihydrolipoyllysine-residue succinyltransferase component of 2-oxoglutarate dehydrogenase complex, mitochondrial [Xenopus laevis], NA	P36957	DLST	DLTS	Dihydrolipoamide S-succinyltransferase (E2 component of 2-oxo-glutarate complex)	0.5339482945387944	0.8152246282690522	FALSE	FALSE	FALSE
ENOG411CQBQ	0	4	0	4	0	-0.12048918043337997	0	-0.1003724528498746	2	2	-0.08519871654405245	ENOG411CQBQ	147904981, Xelaev18028961m.g, Xelaev18012629m.g	GenBank, Xenbase_9.1	Xelaev18028961m.g, Xelaev18012629m.g	ribosomal protein L11 [Xenopus laevis], NA	P62913	RPL11	NA	Ribosomal protein L11	0.5339482945387944	0.8152246282690522	FALSE	FALSE	FALSE
ENOG411CZ5P	0	4	0	4	0	-0.12048918043337997	0	-0.1003724528498746	2	2	-0.08519871654405245	ENOG411CZ5P	148231041, 46250346, Xelaev18022995m.g, Xelaev18010088m.g, Xelaev18025130m.g, Xelaev18006864m.g	GenBank, Xenbase_9.1	pgm1.L, pgm5.S, pgm1.S, pgm5.L	phosphoglucomutase 1 [Xenopus laevis], LOC414455 protein [Xenopus laevis], NA	P36871, Q15124	PGM1, PGM5	NA, PGMRP	Phosphoglucomutase	0.5339482945387944	0.8152246282690522	FALSE	FALSE	FALSE
ENOG411CSPG	0	4	0	4	0	-0.12048918043337997	0	-0.1003724528498746	2	2	-0.08519871654405245	ENOG411CSPG	147899497, 147903040, 44968350, Xelaev18025207m.g, Xelaev18023090m.g	GenBank, Xenbase_9.1	rps8.S, rps8.L	MGC83421 protein [Xenopus laevis], 40S ribosomal protein S8 [Xenopus laevis], ribosomal protein S8 [Xenopus laevis], NA	P62241	RPS8	NA	ribosomal protein S8	0.5339482945387944	0.8152246282690522	FALSE	FALSE	FALSE
ENOG411CZKB	0	4	0	4	0	-0.12048918043337997	0	-0.1003724528498746	2	2	-0.08519871654405245	ENOG411CZKB	148232264, Xelaev18012760m.g	GenBank, Xenbase_9.1	asl.L	argininosuccinate lyase [Xenopus laevis], NA	H7C0S8, P04424	NA, ASL	NA	argininosuccinate lyase	0.5339482945387944	0.8152246282690522	FALSE	FALSE	FALSE
ENOG411D2X8	0	4	0	4	0	-0.12048918043337997	0	-0.1003724528498746	2	2	-0.08519871654405245	ENOG411D2X8	148235638, Xelaev18043840m.g	GenBank, Xenbase_9.1	Xelaev18043840m.g	ribosomal protein L27 [Xenopus laevis], NA	NA	NA	NA	ribosomal protein L27	0.5339482945387944	0.8152246282690522	FALSE	FALSE	FALSE
ENOG411CT3V	0	4	0	4	0	-0.12048918043337997	0	-0.1003724528498746	2	2	-0.08519871654405245	ENOG411CT3V	116063368, 147906628, Xelaev18018744m.g, Xelaev18004859m.g	GenBank, Xenbase_9.1	Xelaev18018744m.g, atp6v1b1.L	MGC154483 protein [Xenopus laevis], ATPase, H+ transporting, lysosomal 56/58kDa, V1 subunit B2 [Xenopus laevis], NA	P21281, P15313	ATP6V1B2, ATP6V1B1	ATP6B2 VPP3, ATP6B1 VATB VPP3	ATPase, H transporting, lysosomal 56 58kDa, V1 subunit	0.5339482945387944	0.8152246282690522	FALSE	FALSE	FALSE
ENOG411CZ92	0	4	0	4	0	-0.12048918043337997	0	-0.1003724528498746	2	2	-0.08519871654405245	ENOG411CZ92	115527863, 148232411, 148238177, Xelaev18033740m.g, Xelaev18046359m.g	GenBank, Xenbase_9.1	sdcbp.S, Xelaev18046359m.g	Sdcbp protein [Xenopus laevis], similar to syndecan binding protein (syntenin) [Xenopus laevis], syndecan binding protein (syntenin) [Xenopus laevis], NA	O00560	SDCBP	MDA9 SYCL	syndecan binding protein (syntenin)	0.5339482945387944	0.8152246282690522	FALSE	FALSE	FALSE
ENOG411CTF1	0	5	0	5	0	-0.13472677589397158	0	-0.10037245284987478	2.5	2.5	-0.09526621684202759	ENOG411CTF1	147905448, 148223495, 148224702, 148236915, 27924168, Xelaev18033699m.g, Xelaev18031986m.g, Xelaev18028411m.g, Xelaev18030301m.g	GenBank, Xenbase_9.1	mapre2.S, mapre2.L, mapre3.L, Xelaev18030301m.g	microtubule-associated protein, RP/EB family, member 1 [Xenopus laevis], microtubule-associated protein, RP/EB family, member 3 [Xenopus laevis], microtubule-associated protein RP/EB family member 2 [Xenopus laevis], Mapre1-prov protein [Xenopus laevis], NA	Q15555, Q15691	MAPRE2, MAPRE1	RP1, NA	microtubule-associated protein RP EB family member	0.5379483121839463	0.8184089091054699	FALSE	FALSE	FALSE
ENOG411CTF4	0	5	0	5	0	-0.13472677589397158	0	-0.10037245284987478	2.5	2.5	-0.09526621684202759	ENOG411CTF4	148225927, 148229117, 28302315, 65253, Xelaev18045870m.g	GenBank, Xenbase_9.1	jup.S	junction plakoglobin [Xenopus laevis], LOC398496 protein [Xenopus laevis], X-plakoglobin [Xenopus laevis], NA	P14923	JUP	CTNNG DP3	Catenin (Cadherin-associated protein), beta 1, 88kDa	0.5379483121839463	0.8184089091054699	FALSE	FALSE	FALSE
ENOG411D2XU	0	6	0	6	0	-0.14760307730803043	0	-0.1003724528498746	3	3	-0.10437113688851053	ENOG411D2XU	147901081, Xelaev18047520m.g, Xelaev18045199m.g	GenBank, Xenbase_9.1	rps15a.S, rps15a.L	uncharacterized protein LOC734509 [Xenopus laevis], NA	P62244	RPS15A	NA	ribosomal protein S15a	0.5415625865064878	0.8224440700942222	FALSE	FALSE	FALSE
ENOG411CWMH	0	7	0	7	0	-0.15944822564928643	0	-0.10037245284987478	3.5	3.5	-0.11274692160477323	ENOG411CWMH	148234431, Xelaev18025750m.g, Xelaev18023766m.g	GenBank, Xenbase_9.1	iars.S, iars.L	isoleucyl-tRNA synthetase [Xenopus laevis], NA	P41252	IARS	NA	Isoleucyl-tRNA synthetase	0.5448843998364372	0.826021563581833	FALSE	FALSE	FALSE
ENOG411CQFY	4	20	2	25	-0.649714114404157	0.4776679490011723	-0.6069050536018332	0.20774984251245726	12	13.5	-0.12165501023359288	ENOG411CQFY	148232533, Xelaev18017545m.g	GenBank, Xenbase_9.1	cct2.L	chaperonin containing TCP1, subunit 2 (beta) [Xenopus laevis], NA	P78371	CCT2	99D8.1 CCTB	Chaperonin containing TCP1, subunit 2 (Beta)	0.54841387743630865	0.8299006463859183	FALSE	FALSE	FALSE
ENOG411CZ1K	0	9	0	9	0	-0.1808396796955789	0	-0.1003724528498746	4.5	4.5	-0.12787296382034705	ENOG411CZ1K	147902659, 171847306, 350529339, Xelaev18000829m.g, Xelaev18019123m.g	GenBank, Xenbase_9.1	khsrp.S, khsrp.L	RNA-binding protein VgRBP71 [Xenopus laevis], LOC100158419 protein [Xenopus laevis], KH-type splicing regulatory protein [Xenopus laevis], NA	Q92945	KHSRP	FUBP2	KH-type splicing regulatory protein	0.5508752464430544	0.8314453858253731	FALSE	FALSE	FALSE
ENOG411CSPJ	1	2	0	4	-0.9133743785268378	0.7307320887233787	-0.8699394594356271	0.6365931413163315	1.5	2	-0.12914760165146455	ENOG411CSPJ	147903908, Xelaev18017664m.g	GenBank, Xenbase_9.1	aass.L	aminoadipate-semialdehyde synthase [Xenopus laevis], NA	Q9UDR5	AASS	NA	aminoadipate-semialdehyde synthase	0.5513795716526159	0.8314453858253731	FALSE	FALSE	FALSE
ENOG411CVD6	0	17	0	17	0	-0.24877379297872804	0	-0.10037245284987478	8.5	8.5	-0.1759096359967569	ENOG411CVD6	117667435, 124481743, 148223878, 148225656, 169642445, 210063369, 210063371, 213626935, 34785893, 38014765, 49117916, 50924726, 54261627, Xelaev18047510m.g, Xelaev18025550m.g, Xelaev18037682m.g, Xelaev18044210m.g, Xelaev18035902m.g, Xelaev18046824m.g, Xelaev18045183m.g	GenBank, Xenbase_9.1	myh11.S, myh9.S, myh14.S, myh10.L, myh14.L, myh10.S, myh11.L	myosin-2a [Xenopus laevis], Unknown (protein for IMAGE:4175361) [Xenopus laevis], myosin, heavy chain 10, non-muscle [Xenopus laevis], myosin, heavy chain 9, non-muscle [Xenopus laevis], LOC495286 protein [Xenopus laevis], smooth muscle myosin heavy chain isoform SM1 [Xenopus laevis], smooth muscle myosin heavy chain isoform SM2 [Xenopus laevis], LOC398083 protein [Xenopus laevis], LOC398719 prot…	P35580, P35579, P35749	MYH10, MYH9, MYH11	NA, KIAA0866	myosin, heavy chain	0.5698175325140791	0.8568123566428085	FALSE	FALSE	FALSE
ENOG411CSAX	4	14	3	15	-0.21066065365606895	-0.0395122396790699	-0.19186755432298935	-0.0072630484583931934	9	9	-0.17689894934633552	ENOG411CSAX	114108053, 122936400, 147902645	GenBank	NA	LOC733335 protein [Xenopus laevis], LOC100037080 protein [Xenopus laevis], ribosomal protein SA [Xenopus laevis]	P08865	RPSA	LAMBR LAMR1	Required for the assembly and or stability of the 40S ribosomal subunit. Required for the processing of the 20S rRNA- precursor to mature 18S rRNA in a late step of the maturation of 40S ribosomal subunits. Also functions as a cell surface receptor for laminin. Plays a role in cell adhesion to the basement membrane and in the consequent activation of signaling transduction pathways. May play a ro…	0.5702061180465007	0.8568123566428085	FALSE	FALSE	FALSE
ENOG411CY9P	7	30	6	31	-0.05541194742135457	-0.20237636613942725	-0.06258453737802286	-0.05456876323674984	18.5	18.5	-0.18228386462947282	ENOG411CY9P	148238090, Xelaev18028315m.g, Xelaev18030252m.g	GenBank, Xenbase_9.1	hadha.L, hadha.S	hydroxyacyl-CoA dehydrogenase/3-ketoacyl-CoA thiolase/enoyl-CoA hydratase (trifunctional protein), alpha subunit [Xenopus laevis], NA	P40939	HADHA	HADH	Hydroxyacyl-CoA dehydrogenase 3-ketoacyl-CoA thiolase enoyl-CoA hydratase (Trifunctional protein), alpha subunit	0.5723200196459807	0.858480029468971	FALSE	FALSE	FALSE
ENOG411D2XG	2	5	1	6	-0.45891978196333955	0.16714814517124252	-0.45490196015678314	0.12201996848657304	3.5	3.5	-0.20631370293359017	ENOG411D2XG	147903020, Xelaev18011746m.g, Xelaev18004691m.g, Xelaev18012938m.g, Xelaev18015505m.g	GenBank, Xenbase_9.1	Xelaev18011746m.g, Xelaev18004691m.g, Xelaev18012938m.g, Xelaev18015505m.g	60S ribosomal protein L31 [Xenopus laevis], NA	P62899	RPL31	NA	Ribosomal protein L31	0.581727062304258	0.8710624137830834	FALSE	FALSE	FALSE
ENOG411CQ4S	1	12	1	11	0.08422900289364679	-0.41794828696992037	0.1300605405643729	-0.21584967026981067	6.5	6	-0.23597516878305289	ENOG411CQ4S	147900107, 147903527, 147906435, 148224194, 148224758, 213623988, 213625350, Xelaev18041295m.g, Xelaev18039572m.g, Xelaev18041293m.g, Xelaev18039576m.g, Xelaev18039575m.g, Xelaev18039574m.g	GenBank, Xenbase_9.1	serpina3.S, serpina3m.L, serpina1.S, serpina1.L, serpina3k.L, serpina3.L	serpin peptidase inhibitor, clade A (alpha-1 antiproteinase, antitrypsin), member 1 precursor [Xenopus laevis], serine (or cysteine) proteinase inhibitor, clade A, member 3K [Xenopus laevis], serpin peptidase inhibitor, clade A (alpha-1 antiproteinase, antitrypsin), member 3 [Xenopus laevis], serine protease inhibitor A6 precursor [Xenopus laevis], alpha-1-antiproteinase precursor [Xenopus laevis…	P01009, P01011, Q86WD7, P29622, Q86U17, P05543, P05154, P08185, Q8IW75	SERPINA1, SERPINA3, SERPINA9, SERPINA4, SERPINA11, SERPINA7, SERPINA5, SERPINA6, SERPINA12	AAT PI, AACT, GCET1 SERPINA11, KST PI4, NA, TBG, PCI PLANH3 PROCI, CBG	serpin peptidase inhibitor, clade A (alpha-1 antiproteinase, antitrypsin), member	0.5932740307248852	0.8867994690031064	FALSE	FALSE	FALSE
ENOG411CXTK	1	6	1	5	0.08422900289364679	-0.4497699657630322	0.1300605405643729	-0.32276487418632255	3.5	3	-0.2584764936464024	ENOG411CXTK	1850344, 58802759, Xelaev18025631m.g, Xelaev18023625m.g	GenBank, Xenbase_9.1	tpr.S, tpr.L	Tpr [Xenopus laevis], TPR [Xenopus laevis], NA	P12270	TPR	NA	translocated promoter region, nuclear basket protein	0.6019804059744932	0.8966781308505082	FALSE	FALSE	FALSE
ENOG411CSCT	1	6	1	5	0.08422900289364679	-0.4497699657630322	0.1300605405643729	-0.32276487418632255	3.5	3	-0.2584764936464024	ENOG411CSCT	148222341, Xelaev18028871m.g, Xelaev18039623m.g, Xelaev18022237m.g, Xelaev18041241m.g	GenBank, Xenbase_9.1	atl2-like.S, atl1.L, atl3.L, atl1.S	atlastin-2 [Xenopus laevis], NA	Q8NHH9, Q8WXF7, Q6DD88	ATL2, ATL1, ATL3	ARL6IP2, GBP3 SPG3A, NA	Atlastin GTPase	0.6019804059744932	0.8966781308505082	FALSE	FALSE	FALSE
ENOG411CP8R	1	4	0	6	-0.9133743785268378	0.5122645051968542	-0.8699394594356271	0.3850543743203671	2.5	3	-0.2836275114325085	ENOG411CP8R	125858369, 148225274, Xelaev18033957m.g, Xelaev18032303m.g	GenBank, Xenbase_9.1	eif3h.S, eif3h.L	LOC100037221 protein [Xenopus laevis], eukaryotic translation initiation factor 3 subunit H [Xenopus laevis], NA	O15372	EIF3H	EIF3S3	Component of the eukaryotic translation initiation factor 3 (eIF-3) complex, which is required for several steps in the initiation of protein synthesis. The eIF-3 complex associates with the 40S ribosome and facilitates the recruitment of eIF-1, eIF-1A, eIF-2 GTP methionyl-tRNAi and eIF-5 to form the 43S preinitiation complex (43S PIC). The eIF-3 complex stimulates mRNA recruitment to the 43S PIC…	0.6116520742619738	0.9095000408591088	FALSE	FALSE	FALSE
ENOG411CQ30	5	19	4	19	-0.1461133029540556	-0.26306254079176883	-0.13297386526942087	-0.1003724528498746	12	11.5	-0.2893310138103996	ENOG411CQ30	147901873, 147903585, Xelaev18006966m.g, Xelaev18010175m.g	GenBank, Xenbase_9.1	habp4.L, habp4.S	hyaluronan binding protein 4 [Xenopus laevis], uncharacterized protein LOC398807 [Xenopus laevis], NA	Q5JVS0	HABP4	NA	Hyaluronan binding protein 4	0.6138359594284951	0.9111627522766724	FALSE	FALSE	FALSE
ENOG411CYR3	0	9	0	8	0	-0.4239458792803582	0	-0.2523755462949247	4.5	4	-0.2997750060952347	ENOG411CYR3	13507199, 13507201, 148222063, 46249504, 55250541, Xelaev18032983m.g, Xelaev18044690m.g, Xelaev18030884m.g, Xelaev18030883m.g	GenBank, Xenbase_9.1	Xelaev18032983m.g, dync1i2.L, Xelaev18030884m.g, Xelaev18030883m.g	cytoplasmic dynein intermediate chain [Xenopus laevis], uncharacterized protein LOC431853 [Xenopus laevis], Unknown (protein for MGC:81132) [Xenopus laevis], Unknown (protein for MGC:84474) [Xenopus laevis], NA	Q13409, O14576	DYNC1I2, DYNC1I1	DNCI2 DNCIC2, DNCI1 DNCIC1	Dynein cytoplasmic 1 intermediate chain	0.6178256093597743	0.9123829507376389	FALSE	FALSE	FALSE
ENOG411D580	0	8	0	7	0	-0.4292647230842246	0	-0.27029745429218704	4	3.5	-0.3035359966170207	ENOG411D580	Xelaev18044063m.g, Xelaev18008113m.g, Xelaev18008114m.g, Xelaev18010853m.g	Xenbase_9.1	avd.2.L, Xelaev18008113m.g, Xelaev18008114m.g, Xelaev18010853m.g	NA	NA	NA	NA	Avidin family	0.61925929036966	0.9123829507376389	FALSE	FALSE	FALSE
ENOG411CPQV	0	7	0	6	0	-0.43741345853876795	0	-0.2930175307922706	3.5	3	-0.30929802271502355	ENOG411CPQV	116063513, 147900299, 148222856, Xelaev18031782m.g	GenBank, Xenbase_9.1	cndp2.L	Cn2 protein [Xenopus laevis], CNDP dipeptidase 2 a [Xenopus laevis], CNDP dipeptidase 2 b [Xenopus laevis], NA	Q96KP4	CNDP2	CN2 CPGL HEL-S-13 PEPA	CNDP dipeptidase 2 (Metallopeptidase M20 family)	0.6214525825360862	0.9123829507376389	FALSE	FALSE	FALSE
ENOG411CW58	4	35	3	36	-0.21066065365606895	-0.23843815247772654	-0.19186755432298935	-0.06084408866323729	19.5	19.5	-0.3175608112399894	ENOG411CW58	1045604, 117949833, Xelaev18042878m.g, Xelaev18042888m.g	GenBank, Xenbase_9.1	Xelaev18042878m.g, Xelaev18042888m.g	CCTgamma [Xenopus laevis], RecName: Full=T-complex protein 1 subunit gamma; Short=TCP-1-gamma; AltName: Full=CCT-gamma, NA	P49368	CCT3	CCTG TRIC5	Chaperonin containing Tcp1, subunit 3 (Gamma)	0.6245909477322973	0.9123829507376389	FALSE	FALSE	FALSE
ENOG411CUG9	0	6	0	5	0	-0.4497699657630322	0	-0.32276487418632255	3	2.5	-0.31803539276508136	ENOG411CUG9	148234086, Xelaev18011100m.g	GenBank, Xenbase_9.1	acaa2.S	acetyl-CoA acyltransferase 2 [Xenopus laevis], NA	P42765	ACAA2	NA	acetyl-CoA acyltransferase 2	0.6247709549696253	0.9123829507376389	FALSE	FALSE	FALSE
ENOG411CSCH	0	6	0	5	0	-0.4497699657630322	0	-0.32276487418632255	3	2.5	-0.31803539276508136	ENOG411CSCH	148222492, 148222521, 71051157, Xelaev18043093m.g, Xelaev18045868m.g	GenBank, Xenbase_9.1	acly.L, acly.S	uncharacterized protein LOC495316 [Xenopus laevis], ATP citrate lyase [Xenopus laevis], LOC495086 protein [Xenopus laevis], NA	P53396	ACLY	NA	ATP citrate lyase	0.6247709549696253	0.9123829507376389	FALSE	FALSE	FALSE
ENOG411CWS7	4	18	5	14	0.5043718823125574	-0.9656096794276361	0.3930949463981667	-0.44140937068494157	11	9.5	-0.32614437407961716	ENOG411CWS7	120577581, 147904655, 148227920, 27769226, 28277344, Xelaev18008749m.g, Xelaev18004907m.g	GenBank, Xenbase_9.1	cct7.S, cct7.L	Unknown (protein for IMAGE:8331814) [Xenopus laevis], uncharacterized protein LOC495278 [Xenopus laevis], chaperonin containing TCP1, subunit 7 [Xenopus laevis], LOC495278 protein [Xenopus laevis], Cct7-prov protein [Xenopus laevis], NA	Q99832	CCT7	CCTH NIP7-1	Chaperonin containing TCP1, subunit 7 (Eta)	0.6278424373846161	0.9123829507376389	FALSE	FALSE	FALSE
ENOG411CUY5	1	3	1	2	0.08422900289364679	-0.5525963577748395	0.1300605405643729	-0.5154099521287187	2	1.5	-0.3311857327228976	ENOG411CUY5	148226057, Xelaev18036929m.g	GenBank, Xenbase_9.1	actr1a.S	ARP1 actin-related protein 1 homolog A, centractin alpha [Xenopus laevis], NA	P61163, P42025	ACTR1A, ACTR1B	CTRN1, CTRN2	ARP1 actin-related protein 1 homolog	0.6297479018284227	0.9123829507376389	FALSE	FALSE	FALSE
ENOG411CQTF	0	5	0	4	0	-0.4687799360862055	0	-0.36340685868366845	2.5	2	-0.3314774716907522	ENOG411CQTF	147898679, 147902768, Xelaev18031001m.g, Xelaev18033084m.g	GenBank, Xenbase_9.1	hibadh.L, hibadh.S	3-hydroxyisobutyrate dehydrogenase [Xenopus laevis], uncharacterized protein LOC495134 [Xenopus laevis], NA	P31937	HIBADH	NA	3-hydroxyisobutyrate dehydrogenase	0.6298580724869915	0.9123829507376389	FALSE	FALSE	FALSE
ENOG411CZ4D	0	5	0	4	0	-0.4687799360862055	0	-0.36340685868366845	2.5	2	-0.3314774716907522	ENOG411CZ4D	148230913, 148233149	GenBank	NA	aspartyl-tRNA synthetase [Xenopus laevis]	P14868	DARS	NA	aspartyl-trna synthetase	0.6298580724869915	0.9123829507376389	FALSE	FALSE	FALSE
ENOG411CWTI	0	5	0	4	0	-0.4687799360862055	0	-0.36340685868366845	2.5	2	-0.3314774716907522	ENOG411CWTI	147906793, 148229465, 212286112, 2231175, 2981313, 2981315, 311819830, 50603710, Xelaev18044530m.g	GenBank, Xenbase_9.1	mcm6.2.L	maternal DNA replication licensing factor mcm6 [Xenopus laevis], zygotic DNA replication licensing factor mcm6-B [Xenopus laevis], zygotic DNA replication licensing factor mcm6-A [Xenopus laevis], mis5p [Xenopus laevis], zygotic DNA replication factor MCM6b [Xenopus laevis], zygotic DNA replication factor MCM6a [Xenopus laevis], unnamed protein product [Xenopus laevis], Mcm6a-A protein [Xenopus l…	Q14566	MCM6	NA	minichromosome maintenance complex component 6	0.6298580724869915	0.9123829507376389	FALSE	FALSE	FALSE
ENOG411CPK3	0	5	0	4	0	-0.4687799360862055	0	-0.36340685868366845	2.5	2	-0.3314774716907522	ENOG411CPK3	147905508, 148227030, Xelaev18023014m.g	GenBank, Xenbase_9.1	psma4.L	proteasome alpha 4 subunit [Xenopus laevis], uncharacterized protein LOC734876 [Xenopus laevis], NA	P25789	PSMA4	HC9 PSC9	The proteasome is a multicatalytic proteinase complex which is characterized by its ability to cleave peptides with Arg, Phe, Tyr, Leu, and Glu adjacent to the leaving group at neutral or slightly basic pH. The proteasome has an ATP-dependent proteolytic activity (By similarity)	0.6298580724869915	0.9123829507376389	FALSE	FALSE	FALSE
ENOG411CUNG	0	5	0	4	0	-0.4687799360862055	0	-0.36340685868366845	2.5	2	-0.3314774716907522	ENOG411CUNG	14275775, 148228126, 148235727, Xelaev18046367m.g, Xelaev18024992m.g, Xelaev18043651m.g	GenBank, Xenbase_9.1	Xelaev18046367m.g, csnk2a2.S, Xelaev18043651m.g	alpha subunit of casein kinase II [Xenopus laevis], casein kinase II subunit alpha [Xenopus laevis], casein kinase 2, alpha prime polypeptide [Xenopus laevis], NA	P68400, Q8NEV1, P19784	CSNK2A1, CSNK2A3, CSNK2A2	CK2A1, CSNK2A1P, CK2A2	Casein kinase 2, alpha	0.6298580724869915	0.9123829507376389	FALSE	FALSE	FALSE
ENOG411CR9Q	2	20	2	18	0.11920377284128798	-0.5955076322595447	0.1300605405643729	-0.24476236218504938	11	10	-0.33679768889997336	ENOG411CR9Q	147904698, 148234684, 1680661, 1680663, 32484255, Xelaev18003048m.g, Xelaev18001770m.g	GenBank, Xenbase_9.1	pdhb.S, pdhb.L	pyruvate dehydrogenase (lipoamide) beta [Xenopus laevis], pyruvate dehydrogenase E1-beta subunit [Xenopus laevis], PdhE1beta-1 protein [Xenopus laevis], NA	P11177	PDHB	PHE1B	Pyruvate dehydrogenase (Lipoamide) beta	0.6318652923043242	0.9123829507376389	FALSE	FALSE	FALSE
ENOG411D1G5	0	4	0	3	0	-0.499284043369929	0	-0.4223005477372369	2	1.5	-0.35304713280511507	ENOG411D1G5	148227451, Xelaev18013111m.g	GenBank, Xenbase_9.1	pcca.L	propionyl CoA carboxylase, alpha polypeptide [Xenopus laevis], NA	P05165	PCCA	NA	propionyl CoA carboxylase, alpha polypeptide	0.637973447075338	0.9123829507376389	FALSE	FALSE	FALSE
ENOG411CS7N	0	4	0	3	0	-0.499284043369929	0	-0.4223005477372369	2	1.5	-0.35304713280511507	ENOG411CS7N	147904152, 148234316, Xelaev18008676m.g, Xelaev18041787m.g	GenBank, Xenbase_9.1	idh3b.S, idh3g.S	isocitrate dehydrogenase 3 (NAD+) gamma [Xenopus laevis], isocitrate dehydrogenase 3 (NAD+) beta [Xenopus laevis], NA	P51553, O43837	IDH3G, IDH3B	NA	Isocitrate dehydrogenase 3 (NAD)	0.637973447075338	0.9123829507376389	FALSE	FALSE	FALSE
ENOG411D4Y2	0	4	0	3	0	-0.499284043369929	0	-0.4223005477372369	2	1.5	-0.35304713280511507	ENOG411D4Y2	148226741, 284447277, Xelaev18032215m.g	GenBank, Xenbase_9.1	cox6c.L	cytochrome c oxidase subunit VIc [Xenopus laevis], NA	P09669	COX6C	NA	Cytochrome c oxidase subunit	0.637973447075338	0.9123829507376389	FALSE	FALSE	FALSE
ENOG411CTZS	0	4	0	3	0	-0.499284043369929	0	-0.4223005477372369	2	1.5	-0.35304713280511507	ENOG411CTZS	147898867, 147901187, 147901835, 147906825, 148224373, 148234146, 32450315, Xelaev18039961m.g, Xelaev18039391m.g, Xelaev18024172m.g, Xelaev18041034m.g, Xelaev18042575m.g, Xelaev18026642m.g	GenBank, Xenbase_9.1	actn1.L, actn4.L, actn3.S, actn1.S, actn4.S, Xelaev18026642m.g	actinin, alpha 2 [Xenopus laevis], MGC79035 protein [Xenopus laevis], actinin, alpha 4 [Xenopus laevis], actinin, alpha 3 [Xenopus laevis], actinin, alpha 1 [Xenopus laevis], uncharacterized protein LOC431885 [Xenopus laevis], Unknown (protein for IMAGE:6873085) [Xenopus laevis], NA	P12814, P35609, O43707, Q08043	ACTN1, ACTN2, ACTN4, ACTN3	NA	actinin, alpha	0.637973447075338	0.9123829507376389	FALSE	FALSE	FALSE
ENOG411CXS1	0	4	0	3	0	-0.499284043369929	0	-0.4223005477372369	2	1.5	-0.35304713280511507	ENOG411CXS1	123959702, 148235215, Xelaev18021269m.g	GenBank, Xenbase_9.1	rps16.S	Rps16 protein [Xenopus laevis], ribosomal protein S16 [Xenopus laevis], NA	P62249	RPS16	NA	Ribosomal protein S16	0.637973447075338	0.9123829507376389	FALSE	FALSE	FALSE
ENOG411CVY3	4	24	3	24	-0.21066065365606895	-0.29583063654360414	-0.19186755432298935	-0.10037245284987478	14	13.5	-0.35814342591211235	ENOG411CVY3	147904838, Xelaev18046130m.g, Xelaev18043403m.g	GenBank, Xenbase_9.1	cse1l.S, cse1l.L	exportin-2 [Xenopus laevis], NA	P55060	CSE1L	CAS XPO2	CSE1 chromosome segregation 1-like (yeast)	0.6398820088365285	0.9123829507376389	FALSE	FALSE	FALSE
ENOG411D2YX	6	23	6	20	0.2070658812968957	-0.7488342916142765	0.1300605405643729	-0.2930175307922706	14.5	13	-0.38308811676807586	ENOG411D2YX	148236927, Xelaev18006476m.g, Xelaev18033834m.g	GenBank, Xenbase_9.1	Xelaev18006476m.g, Xelaev18033834m.g	ubiquitin A-52 residue ribosomal protein fusion product 1 [Xenopus laevis], NA	P62987	UBA52	UBCEP2	Ubiquitin A-52 residue ribosomal protein fusion product 1	0.6491727848811569	0.9123829507376389	FALSE	FALSE	FALSE
ENOG411CV92	2	2	1	2	-0.45891978196333955	-0.08517877068950216	-0.45490196015678314	-0.10037245284987478	2	1.5	-0.3847357762146101	ENOG411CV92	147898923, 147903525, Xelaev18022671m.g, Xelaev18024946m.g	GenBank, Xenbase_9.1	kars.L, kars.S	lysyl-tRNA synthetase [Xenopus laevis], NA	Q15046	KARS	KIAA0070	lysyl-tRNA synthetase	0.6497834069494431	0.9123829507376389	FALSE	FALSE	FALSE
ENOG411CUGW	0	3	0	2	0	-0.5525963577748395	0	-0.5154099521287187	1.5	1	-0.39074463184157654	ENOG411CUGW	147905680, 148224976, Xelaev18041118m.g	GenBank, Xenbase_9.1	psma3.S	proteasome (prosome, macropain) subunit, alpha type, 3 [Xenopus laevis], uncharacterized protein LOC379676 [Xenopus laevis], NA	P25788	PSMA3	HC8 PSC8	The proteasome is a multicatalytic proteinase complex which is characterized by its ability to cleave peptides with Arg, Phe, Tyr, Leu, and Glu adjacent to the leaving group at neutral or slightly basic pH. The proteasome has an ATP-dependent proteolytic activity (By similarity)	0.6520069975446753	0.9123829507376389	FALSE	FALSE	FALSE
ENOG411CUQS	0	3	0	2	0	-0.5525963577748395	0	-0.5154099521287187	1.5	1	-0.39074463184157654	ENOG411CUQS	147902028, 148233020, Xelaev18023555m.g	GenBank, Xenbase_9.1	st13.L	MGC79131 protein [Xenopus laevis], suppression of tumorigenicity 13 (colon carcinoma) (Hsp70 interacting protein) [Xenopus laevis], NA	P50502, Q8NFI4, Q8IZP2	ST13, ST13P5, ST13P4	AAG2 FAM10A1 HIP SNC6, FAM10A5, FAM10A4	suppression of tumorigenicity 13 (colon carcinoma) (Hsp70 interacting protein)	0.6520069975446753	0.9123829507376389	FALSE	FALSE	FALSE
ENOG411CXSV	0	3	0	2	0	-0.5525963577748395	0	-0.5154099521287187	1.5	1	-0.39074463184157654	ENOG411CXSV	148222557, 148226493, 27882460, Xelaev18020916m.g	GenBank, Xenbase_9.1	atp5c1.S	uncharacterized protein LOC414720 [Xenopus laevis], ATP synthase, H+ transporting, mitochondrial F1 complex, gamma polypeptide 1 [Xenopus laevis], Atp5c1 protein [Xenopus laevis], NA	P36542	ATP5F1C	ATP5C ATP5C1 ATP5CL1	Mitochondrial membrane ATP synthase (F(1)F(0) ATP synthase or Complex V) produces ATP from ADP in the presence of a proton gradient across the membrane which is generated by electron transport complexes of the respiratory chain. F-type ATPases consist of two structural domains, F(1) - containing the extramembraneous catalytic core, and F(0) - containing the membrane proton channel, linked togethe…	0.6520069975446753	0.9123829507376389	FALSE	FALSE	FALSE
ENOG411CQ8S	0	3	0	2	0	-0.5525963577748395	0	-0.5154099521287187	1.5	1	-0.39074463184157654	ENOG411CQ8S	147901558, 147901815, Xelaev18018502m.g	GenBank, Xenbase_9.1	erlin2.L	erlin-2-A precursor [Xenopus laevis], erlin-2-B precursor [Xenopus laevis], NA	O94905, O75477	ERLIN2, ERLIN1	C8orf2 SPFH2, C10orf69 KE04 KEO4 SPFH1	ER lipid raft associated	0.6520069975446753	0.9123829507376389	FALSE	FALSE	FALSE
ENOG411DDF5	0	3	0	2	0	-0.5525963577748395	0	-0.5154099521287187	1.5	1	-0.39074463184157654	ENOG411DDF5	Xelaev18022246m.g, Xelaev18024207m.g, Xelaev18028932m.g	Xenbase_9.1	ahnak.L, ahnak-like.S, loc101735110.S	NA	NA	NA	NA	NA	0.6520069975446753	0.9123829507376389	FALSE	FALSE	FALSE
ENOG411CPYT	0	3	0	2	0	-0.5525963577748395	0	-0.5154099521287187	1.5	1	-0.39074463184157654	ENOG411CPYT	147900143, 147905238, 16303786, 89275119, Xelaev18037565m.g	GenBank, Xenbase_9.1	park7.S	parkinson protein 7 [Xenopus laevis], Parkinson disease (autosomal recessive, early onset) 7 b [Xenopus laevis], SP22 [Xenopus laevis], NA	Q99497	PARK7	NA	parkinson protein 7	0.6520069975446753	0.9123829507376389	FALSE	FALSE	FALSE
ENOG411CP4R	0	3	0	2	0	-0.5525963577748395	0	-0.5154099521287187	1.5	1	-0.39074463184157654	ENOG411CP4R	148234941, Xelaev18031896m.g	GenBank, Xenbase_9.1	usp14.L	ubiquitin specific peptidase 14 (tRNA-guanine transglycosylase) [Xenopus laevis], NA	P54578	USP14	TGT	ubiquitin specific peptidase 14 (tRNA-guanine transglycosylase)	0.6520069975446753	0.9123829507376389	FALSE	FALSE	FALSE
ENOG411CQUK	0	3	0	2	0	-0.5525963577748395	0	-0.5154099521287187	1.5	1	-0.39074463184157654	ENOG411CQUK	147901729	GenBank	NA	eukaryotic translation initiation factor 3 subunit D [Xenopus laevis]	O15371	EIF3D	EIF3S7	Component of the eukaryotic translation initiation factor 3 (eIF-3) complex, which is required for several steps in the initiation of protein synthesis. The eIF-3 complex associates with the 40S ribosome and facilitates the recruitment of eIF-1, eIF-1A, eIF-2 GTP methionyl-tRNAi and eIF-5 to form the 43S preinitiation complex (43S PIC). The eIF-3 complex stimulates mRNA recruitment to the 43S PIC…	0.6520069975446753	0.9123829507376389	FALSE	FALSE	FALSE
ENOG411D67J	0	3	0	2	0	-0.5525963577748395	0	-0.5154099521287187	1.5	1	-0.39074463184157654	ENOG411D67J	147905368, Xelaev18005217m.g, Xelaev18008996m.g	GenBank, Xenbase_9.1	rpl9.L, rpl9.S	ribosomal protein L9 [Xenopus laevis], NA	P32969	RPL9; RPL9P7; RPL9P8; RPL9P9	; ; ;	Ribosomal protein L9	0.6520069975446753	0.9123829507376389	FALSE	FALSE	FALSE
ENOG411CR45	0	3	0	2	0	-0.5525963577748395	0	-0.5154099521287187	1.5	1	-0.39074463184157654	ENOG411CR45	148227832, Xelaev18031110m.g	GenBank, Xenbase_9.1	rpl14.L	ribosomal protein L14 [Xenopus laevis], NA	P50914	RPL14	NA	ribosomal protein L14	0.6520069975446753	0.9123829507376389	FALSE	FALSE	FALSE
ENOG411CR2V	0	3	0	2	0	-0.5525963577748395	0	-0.5154099521287187	1.5	1	-0.39074463184157654	ENOG411CR2V	147905319, Xelaev18002491m.g, Xelaev18019824m.g	GenBank, Xenbase_9.1	akr1b1.L, akr1b1.S	aldo-keto reductase family 1, member B1 (aldose reductase) [Xenopus laevis], NA	P15121, Q96JD6	AKR1B1, AKR1E2	ALDR1 ALR2, AKR1CL2 AKRDC1	aldo-keto reductase family 1, member	0.6520069975446753	0.9123829507376389	FALSE	FALSE	FALSE
ENOG411CYK0	0	3	0	2	0	-0.5525963577748395	0	-0.5154099521287187	1.5	1	-0.39074463184157654	ENOG411CYK0	115529151, 120577544, 66910737	GenBank	NA	LOC733250 protein [Xenopus laevis]	Q14956	GPNMB	HGFIN NMB	Glycoprotein (Transmembrane) nmb	0.6520069975446753	0.9123829507376389	FALSE	FALSE	FALSE
ENOG411CWCR	0	3	0	2	0	-0.5525963577748395	0	-0.5154099521287187	1.5	1	-0.39074463184157654	ENOG411CWCR	125858582, 147906891, 148227998, 148229393, 148231809, 148232796, 148236737, 157423181, 213625094, 49522906, Xelaev18014850m.g, Xelaev18024367m.g, Xelaev18021172m.g, Xelaev18037797m.g, Xelaev18036072m.g, Xelaev18024368m.g	GenBank, Xenbase_9.1	ren.S, loc613063.S, loc100493461.S, Xetrov90019222m.S, napsa.L, ctsd.S	Ce1-A protein [Xenopus laevis], cathepsin D precursor [Xenopus laevis], cathepsin E-A precursor [Xenopus laevis], MGC82347 protein precursor [Xenopus laevis], napsin A aspartic peptidase precursor [Xenopus laevis], cathepsin E-B precursor [Xenopus laevis], Cathepsin E2 [Xenopus laevis], LOC443721 protein [Xenopus laevis], NA	P07339, P14091, O96009, P00797	CTSD, CTSE, NAPSA, REN	CPSD, NA, NAP1 NAPA	cathepsin	0.6520069975446753	0.9123829507376389	FALSE	FALSE	FALSE
ENOG411CR53	27	41	25	38	0.162506876844036	-0.7269026707293476	0.023145336647861083	-0.20728765676638636	34	31.5	-0.39908809312946875	ENOG411CR53	119132, 119138, 119140, 120577575, 148222846, 148232467, 148234170, 214113, 64659, Xelaev18029519m.g, Xelaev18043588m.g	GenBank, Xenbase_9.1	Xelaev18029519m.g, eef1a2.L	RecName: Full=Elongation factor 1-alpha, somatic form; Short=EF-1-alpha-S, RecName: Full=Elongation factor 1-alpha, oocyte form; Short=EF-1-alpha-O; Short=EF-1AO; AltName: Full=42S p48, RecName: Full=Elongation factor 1-alpha, oocyte form; AltName: Full=EF-1-alpha-O1; Short=EF-1AO1, LOC100037028 protein [Xenopus laevis], elongation factor 1-alpha, oocyte form [Xenopus laevis], eukaryotic translat…	P68104, Q5VTE0, Q05639	EEF1A1, EEF1A1P5, EEF1A2	EEF1A EF1A LENG7, EEF1AL3, EEF1AL STN	This protein promotes the GTP-dependent binding of aminoacyl-tRNA to the A-site of ribosomes during protein biosynthesis (By similarity)	0.6550858523294942	0.9150730051606918	FALSE	FALSE	FALSE
ENOG411CU55	5	8	4	7	-0.1461133029540556	-0.4292647230842246	-0.13297386526942087	-0.27029745429218704	6.5	5.5	-0.4068537039573978	ENOG411CU55	120577551, 148226998, 160708003, 163915549, 28278096, 284520901, 46249628, 52789298, Xelaev18006533m.g, Xelaev18006534m.g	GenBank, Xenbase_9.1	grhpr.1.L, loc594879.L	Unknown (protein for IMAGE:7007727) [Xenopus laevis], glyoxylate reductase/hydroxypyruvate reductase, gene 1 [Xenopus laevis], glyoxylate reductase/hydroxypyruvate reductase, gene 2 [Xenopus laevis], Unknown (protein for IMAGE:7008158) [Xenopus laevis], LOC398508 protein [Xenopus laevis], glyoxylate reductase/hydroxypyruvate reductase-like protein [Xenopus laevis], LOC494855 protein [Xenopus laev…	Q9UBQ7	GRHPR	GLXR	Glyoxylate reductase hydroxypyruvate reductase	0.6579422797986463	0.9150730051606918	FALSE	FALSE	FALSE
ENOG411CR02	0	13	0	11	0	-0.6268630532550732	0	-0.32276487418632255	6.5	5.5	-0.4432591158319661	ENOG411CR02	123127, 148229755, 213626743, 50417514, Xelaev18025187m.g, Xelaev18023070m.g	GenBank, Xenbase_9.1	nasp.S, nasp.L	RecName: Full=Histone-binding protein N1/N2, uncharacterized protein LOC734974 [Xenopus laevis], N1/N2 protein [Xenopus laevis], NA	P49321	NASP	NA	Nuclear autoantigenic sperm protein (Histone-binding)	0.6712108379469968	0.9150730051606918	FALSE	FALSE	FALSE
ENOG411CWT1	4	10	3	9	-0.21066065365606895	-0.42061819653615073	-0.19186755432298935	-0.23787597659980947	7	6	-0.4463815557905652	ENOG411CWT1	147899942, 147901918, Xelaev18039722m.g, Xelaev18041172m.g, Xelaev18042371m.g	GenBank, Xenbase_9.1	ckb.L, ckb.S, ckm.S	muscle creatine kinase [Xenopus laevis], brain creatine kinase [Xenopus laevis], NA	P06732, P12277	CKM, CKB	CKMM, CKBB	creatine kinase	0.6723391731893252	0.9150730051606918	FALSE	FALSE	FALSE
ENOG411CWP5	0	12	0	10	0	-0.6364809733870017	0	-0.3413805523536696	6	5	-0.45006001237816334	ENOG411CWP5	132983, 132984, 148227306, 148230833, Xelaev18025391m.g	GenBank, Xenbase_9.1	rpl5.S	RecName: Full=60S ribosomal protein L5-A, RecName: Full=60S ribosomal protein L5-B, 60S ribosomal protein L5-A [Xenopus laevis], 60S ribosomal protein L5-B [Xenopus laevis], NA	P46777	RPL5	NA	ribosomal protein L5	0.6736664155003316	0.9150730051606918	FALSE	FALSE	FALSE
ENOG411CVFE	2	9	1	9	-0.45891978196333955	-0.1808396796955789	-0.45490196015678314	-0.1003724528498746	5.5	5	-0.45237825366727624	ENOG411CVFE	148228229, 51968294, 54261580, Xelaev18024624m.g	GenBank, Xenbase_9.1	psma1.S	proteasome (prosome, macropain) subunit, alpha type, 1 [Xenopus laevis], 20S proteasome alpha6 subunit [Xenopus laevis], Unknown (protein for MGC:86195) [Xenopus laevis], NA	P25786	PSMA1	HC2 NU PROS30 PSC2	The proteasome is a multicatalytic proteinase complex which is characterized by its ability to cleave peptides with Arg, Phe, Tyr, Leu, and Glu adjacent to the leaving group at neutral or slightly basic pH. The proteasome has an ATP-dependent proteolytic activity	0.6745017448247554	0.9150730051606918	FALSE	FALSE	FALSE
ENOG411D16E	2	6	2	4	0.11920377284128798	-0.7817180569847973	0.1300605405643729	-0.5857992800201164	4	3	-0.46846834295082657	ENOG411D16E	1095500, 27735425, Xelaev18020971m.g	GenBank, Xenbase_9.1	psmc2.S	MSS1-like protein, Psmc2 protein [Xenopus laevis], NA	P35998	PSMC2	MSS1	Proteasome (Prosome, macropain) 26S subunit, ATPase 2	0.6802751477570461	0.9150730051606918	FALSE	FALSE	FALSE
ENOG411CUMH	0	10	0	8	0	-0.6633045929408379	0	-0.3898790700448596	5	4	-0.469027175660649	ENOG411CUMH	148231181, 148233734, 148237065, 2370591, 2370593, 28278797, Xelaev18027504m.g	GenBank, Xenbase_9.1	eif4a2.L	translation initiation factor eIF4A II [Xenopus laevis], eukaryotic translation initiation factor 4A1 [Xenopus laevis], eukaryotic translation initiation factor 4A2 [Xenopus laevis], translation initiation factor eIF4A I [Xenopus laevis], LOC444845 protein [Xenopus laevis], NA	Q14240, P60842	EIF4A2, EIF4A1	DDX2B EIF4F, DDX2A EIF4A	eukaryotic translation initiation factor	0.6804748943218889	0.9150730051606918	FALSE	FALSE	FALSE
ENOG411CQA0	0	2	0	1	0	-0.6641402295963569	0	-0.685334953571031	1	0.5	-0.4696180600063745	ENOG411CQA0	147901713, 148229675, Xelaev18005996m.g, Xelaev18037117m.g	GenBank, Xenbase_9.1	sec31a.L, sec31b.S	MGC86445 protein [Xenopus laevis], SEC31 homolog B [Xenopus laevis], NA	O94979, Q9NQW1	SEC31A, SEC31B	KIAA0905 SEC31L1, SEC31L2	SEC31 homolog B (S. cerevisiae)	0.6806860403354169	0.9150730051606918	FALSE	FALSE	FALSE
ENOG411CXUG	0	2	0	1	0	-0.6641402295963569	0	-0.685334953571031	1	0.5	-0.4696180600063745	ENOG411CXUG	Xelaev18029143m.g, Xelaev18000507m.g	Xenbase_9.1	fh.S, loc100491219-like.1	NA	P07954	FH	NA	Fumarate hydratase	0.6806860403354169	0.9150730051606918	FALSE	FALSE	FALSE
ENOG411CZMG	0	2	0	1	0	-0.6641402295963569	0	-0.685334953571031	1	0.5	-0.4696180600063745	ENOG411CZMG	111145603, 145337894, Xelaev18046110m.g, Xelaev18043370m.g	GenBank, Xenbase_9.1	nsf.S, nsf.L	N-ethylmaleimide sensitive factor [Xenopus laevis], LOC100049722 protein [Xenopus laevis], NA	P46459	NSF	NA	N-ethylmaleimide-sensitive factor	0.6806860403354169	0.9150730051606918	FALSE	FALSE	FALSE
ENOG411D33S	0	2	0	1	0	-0.6641402295963569	0	-0.685334953571031	1	0.5	-0.4696180600063745	ENOG411D33S	Xelaev18026418m.g	Xenbase_9.1	mrpl14.L	NA	Q6P1L8	MRPL14	MRPL32 RPML32	Mitochondrial ribosomal protein L14	0.6806860403354169	0.9150730051606918	FALSE	FALSE	FALSE
ENOG411CXU7	0	2	0	1	0	-0.6641402295963569	0	-0.685334953571031	1	0.5	-0.4696180600063745	ENOG411CXU7	114107950, Xelaev18019053m.g, Xelaev18000772m.g	GenBank, Xenbase_9.1	gadd45gip1.L, gadd45gip1.S	LOC779080 protein [Xenopus laevis], NA	Q8TAE8	GADD45GIP1	MRPL59 PLINP1 PRG6	Growth arrest and DNA-damage-inducible, gamma interacting protein 1	0.6806860403354169	0.9150730051606918	FALSE	FALSE	FALSE
ENOG411CRIK	0	2	0	1	0	-0.6641402295963569	0	-0.685334953571031	1	0.5	-0.4696180600063745	ENOG411CRIK	115292159, 148228490, 157423169, 163915590, 76780350, Xelaev18026615m.g, Xelaev18028861m.g, Xelaev18028860m.g, Xelaev18026611m.g, Xelaev18028859m.g	GenBank, Xenbase_9.1	loc100126630.L, hebp2.S, loc100135146.S, hebp2.L, loc100491404.S	LOC734151 protein [Xenopus laevis], heme binding protein 2 precursor [Xenopus laevis], LOC100126630 protein [Xenopus laevis], LOC100137667 protein [Xenopus laevis], LOC733348 protein [Xenopus laevis], NA	Q9Y5Z4	HEBP2	C6orf34 SOUL	Heme binding protein 2	0.6806860403354169	0.9150730051606918	FALSE	FALSE	FALSE
ENOG411CSCK	0	2	0	1	0	-0.6641402295963569	0	-0.685334953571031	1	0.5	-0.4696180600063745	ENOG411CSCK	123898906, 62739333, Xelaev18005006m.g	GenBank, Xenbase_9.1	ptcd3.L	RecName: Full=Pentatricopeptide repeat-containing protein 3, mitochondrial; Flags: Precursor, Ptcd3 protein [Xenopus laevis], NA	Q96EY7	PTCD3	MRPS39	Pentatricopeptide repeat domain 3	0.6806860403354169	0.9150730051606918	FALSE	FALSE	FALSE
ENOG411CS9M	0	2	0	1	0	-0.6641402295963569	0	-0.685334953571031	1	0.5	-0.4696180600063745	ENOG411CS9M	148744489, Xelaev18011482m.g	GenBank, Xenbase_9.1	gart.L	LOC100101294 protein [Xenopus laevis], NA	P22102	GART	PGFT PRGS	Phosphoribosylglycinamide formyltransferase, phosphoribosylglycinamide synthetase, phosphoribosylaminoimidazole synthetase	0.6806860403354169	0.9150730051606918	FALSE	FALSE	FALSE
ENOG411CUUZ	0	2	0	1	0	-0.6641402295963569	0	-0.685334953571031	1	0.5	-0.4696180600063745	ENOG411CUUZ	148225681, 47125202, Xelaev18008224m.g, Xelaev18006216m.g, Xelaev18009751m.g	GenBank, Xenbase_9.1	nln.L, thop1.L, thop1.S	thimet oligopeptidase 1 [Xenopus laevis], LOC397806 protein [Xenopus laevis], NA	Q9BYT8, P52888	NLN, THOP1	AGTBP KIAA1226, NA	Neurolysin (Metallopeptidase M3 family)	0.6806860403354169	0.9150730051606918	FALSE	FALSE	FALSE
ENOG411CY7M	0	2	0	1	0	-0.6641402295963569	0	-0.685334953571031	1	0.5	-0.4696180600063745	ENOG411CY7M	148229003, Xelaev18038058m.g, Xelaev18038057m.g, Xelaev18004281m.g	GenBank, Xenbase_9.1	Xelaev18038058m.g, Xelaev18038057m.g, Xelaev18004281m.g	proteasome 26S ATPase subunit 4 isoform 1 [Xenopus laevis], NA	P43686	PSMC4	MIP224 TBP7	Proteasome (Prosome, macropain) 26S subunit, ATPase, 4	0.6806860403354169	0.9150730051606918	FALSE	FALSE	FALSE
ENOG411CQXG	0	2	0	1	0	-0.6641402295963569	0	-0.685334953571031	1	0.5	-0.4696180600063745	ENOG411CQXG	115527881, 49256283, 62471477, Xelaev18044471m.g, Xelaev18031198m.g	GenBank, Xenbase_9.1	glb1.L, glb1l.L	LOC100158367 protein [Xenopus laevis], LOC443705 protein [Xenopus laevis], NA	P16278, Q6UWU2	GLB1, GLB1L	ELNR1, NA	galactosidase, beta	0.6806860403354169	0.9150730051606918	FALSE	FALSE	FALSE
ENOG411CTQB	0	2	0	1	0	-0.6641402295963569	0	-0.685334953571031	1	0.5	-0.4696180600063745	ENOG411CTQB	147905676, 148230290	GenBank	NA	solute carrier family 25 (carnitine/acylcarnitine translocase), member 20, gene 2 [Xenopus laevis], solute carrier family 25 (carnitine/acylcarnitine translocase), member 20 [Xenopus laevis]	O43772	SLC25A20	CAC CACT	solute carrier family 25 (carnitine acylcarnitine translocase), member 20	0.6806860403354169	0.9150730051606918	FALSE	FALSE	FALSE
ENOG411CUHE	0	2	0	1	0	-0.6641402295963569	0	-0.685334953571031	1	0.5	-0.4696180600063745	ENOG411CUHE	Xelaev18006767m.g, Xelaev18023043m.g, Xelaev18010038m.g	Xenbase_9.1	loc100491155.L, lrrc19.L, loc100491155.S	NA	Q9H756	LRRC19	NA	Leucine rich repeat containing 19	0.6806860403354169	0.9150730051606918	FALSE	FALSE	FALSE
ENOG411CR9K	0	2	0	1	0	-0.6641402295963569	0	-0.685334953571031	1	0.5	-0.4696180600063745	ENOG411CR9K	147905326, 148223285	GenBank	NA	RAB7A, member RAS oncogene family [Xenopus laevis], RAB7, member RAS oncogene family [Xenopus laevis]	P51149	RAB7A	RAB7	RAB7A, member RAS oncogene family	0.6806860403354169	0.9150730051606918	FALSE	FALSE	FALSE
ENOG411CRGD	2	12	1	12	-0.45891978196333955	-0.20888915471963115	-0.45490196015678314	-0.10037245284987478	7	6.5	-0.4722122276655063	ENOG411CRGD	116487892, 148224889, 72679364, Xelaev18041381m.g, Xelaev18039438m.g	GenBank, Xenbase_9.1	aldh6a1.S, aldh6a1.L	Unknown (protein for MGC:154911) [Xenopus laevis], aldehyde dehydrogenase 6 family, member A1 [Xenopus laevis], LOC734217 protein [Xenopus laevis], NA	Q02252	ALDH6A1	MMSDH	aldehyde dehydrogenase 6 family, member A1	0.6816123436258164	0.9150730051606918	FALSE	FALSE	FALSE
ENOG411CSSN	2	13	1	13	-0.45891978196333955	-0.21744423666271745	-0.45490196015678314	-0.1003724528498746	7.5	7	-0.4782615841210692	ENOG411CSSN	147900646, 148228693, Xelaev18016934m.g	GenBank, Xenbase_9.1	hspa9.L	heat shock 70kDa protein 9 (mortalin) [Xenopus laevis], NA	P38646	HSPA9	GRP75 HSPA9B mt-HSP70	heat shock 70kDa protein 9 (mortalin)	0.6837679824622159	0.9150730051606918	FALSE	FALSE	FALSE
ENOG411CPUR	2	16	1	16	-0.45891978196333955	-0.2413176875228068	-0.45490196015678314	-0.10037245284987478	9	8.5	-0.49514266311456223	ENOG411CPUR	148233826, Xelaev18012771m.g	GenBank, Xenbase_9.1	cct6a.L	chaperonin containing TCP1, subunit 6A (zeta 1) [Xenopus laevis], NA	P40227, Q92526	CCT6A, CCT6B	CCT6 CCTZ, NA	chaperonin containing Tcp1, subunit	0.6897502897980776	0.9150730051606918	FALSE	FALSE	FALSE
ENOG411CWBD	0	8	0	6	0	-0.7063837926035806	0	-0.46294253223458304	4	3	-0.49948876987026364	ENOG411CWBD	148223047, 157423022, 160333424, 32450581, 38502274, 46249447, Xelaev18018628m.g, Xelaev18001735m.g, Xelaev18003601m.g, Xelaev18018631m.g, Xelaev18020271m.g	GenBank, Xenbase_9.1	loc100496569.L, ppif.L, Xelaev18003601m.g, ppia.L, loc100496569.S	CYcloPhilin (18.4 kD) (cyp-7) [Xenopus laevis], LOC100126631 protein [Xenopus laevis], peptidylprolyl isomerase A (cyclophilin A) [Xenopus laevis], CypA protein [Xenopus laevis], peptidylprolyl cis-trans isomerase [Xenopus laevis], NA	P62937, P30405	PPIA, PPIF	CYPA, CYP3	PPIases accelerate the folding of proteins (By similarity)	0.6912824518735992	0.9150730051606918	FALSE	FALSE	FALSE
ENOG411CSPS	0	8	0	6	0	-0.7063837926035806	0	-0.46294253223458304	4	3	-0.49948876987026364	ENOG411CSPS	147899668, 148235471, 160420243, 50603606, Xelaev18015328m.g	GenBank, Xenbase_9.1	rbbp7.S	histone-binding protein RBBP4-B [Xenopus laevis], histone-binding protein RBBP4-A [Xenopus laevis], histone-binding protein RBBP7 [Xenopus laevis], Rbbp4 protein [Xenopus laevis], NA	Q09028, Q16576	RBBP4, RBBP7	RBAP48, RBAP46	retinoblastoma binding protein	0.6912824518735992	0.9150730051606918	FALSE	FALSE	FALSE
ENOG411CP84	0	7	0	5	0	-0.7382917967972837	0	-0.5154099521287187	3.5	2.5	-0.5220511360097598	ENOG411CP84	148227463, 148234082, Xelaev18003300m.g, Xelaev18016290m.g	GenBank, Xenbase_9.1	acat1.L, acat1.S	acetyl-CoA acetyltransferase A, mitochondrial precursor [Xenopus laevis], acetyl-CoA acetyltransferase B, mitochondrial precursor [Xenopus laevis], NA	P24752	ACAT1	ACAT MAT	acetyl-CoA acetyltransferase 1	0.699182636427282	0.9150730051606918	FALSE	FALSE	FALSE
ENOG411CSZ5	0	7	0	5	0	-0.7382917967972837	0	-0.5154099521287187	3.5	2.5	-0.5220511360097598	ENOG411CSZ5	147900049, 147907272, 160420331, Xelaev18011459m.g, Xelaev18011460m.g, Xelaev18011458m.g	GenBank, Xenbase_9.1	Xelaev18011459m.g, cbr3.L, cbr1.L	carbonyl reductase 1 [Xenopus laevis], uncharacterized protein LOC496039 [Xenopus laevis], carbonyl reductase 3 [Xenopus laevis], NA	P16152, O75828	CBR1, CBR3	CBR CRN SDR21C1, NA	Carbonyl reductase	0.699182636427282	0.9150730051606918	FALSE	FALSE	FALSE
ENOG411D3C6	3	7	1	8	-0.8547611711384113	0.09915619467556122	-0.8699394594356271	0.06955254859243754	5	4.5	-0.5342934027551829	ENOG411D3C6	11761319, 148231554, 3341887, 9964085	GenBank	NA	cold-inducible RNA binding protein 2 [Xenopus laevis], cold-inducible RNA-binding protein A [Xenopus laevis], cold-inducible RNA binding protein [Xenopus laevis], cold-inducible RNA binding protein XCIRP-1 [Xenopus laevis]	Q14011	CIRBP	A18HNRNP CIRP	Cold inducible RNA binding protein	0.7034307220622913	0.9150730051606918	FALSE	FALSE	FALSE
ENOG411CWDC	10	15	9	12	0.03655420319290537	-0.8128078081565356	-0.007442983185561936	-0.3999327347087826	12.5	10.5	-0.5488941879902863	ENOG411CWDC	148228072, 148230444, Xelaev18034350m.g	GenBank, Xenbase_9.1	phb2.L	MGC84728 protein [Xenopus laevis], prohibitin 2 [Xenopus laevis], NA	Q99623	PHB2	BAP REA	prohibitin 2	0.7084609665084209	0.9150730051606918	FALSE	FALSE	FALSE
ENOG411DFW7	0	6	0	4	0	-0.7817180569847973	0	-0.5857992800201164	3	2	-0.5527581390699221	ENOG411DFW7	123896301, Xelaev18026168m.g, Xelaev18028728m.g	GenBank, Xenbase_9.1	eml4.L, eml4.S	RecName: Full=Echinoderm microtubule-associated protein-like 4; Short=EMAP-4, NA	NA	NA	NA	echinoderm microtubule associated protein like 4	0.70978548177765	0.9150730051606918	FALSE	FALSE	FALSE
ENOG411DGCS	1	6	0	7	-0.9133743785268378	0.13013515159926928	-0.8699394594356271	0.09227262509252131	3.5	3.5	-0.5538337686517928	ENOG411DGCS	148234283, Xelaev18016099m.g, Xelaev18013645m.g	GenBank, Xenbase_9.1	lima1.S, lima1.L	LIM domain and actin binding 1 [Xenopus laevis], NA	NA	NA	NA	LIM domain and actin binding 1	0.710153692229138	0.9150730051606918	FALSE	FALSE	FALSE
ENOG411CQSS	2	10	2	7	0.11920377284128798	-0.9203690814842627	0.1300605405643729	-0.5598040714871719	6	4.5	-0.5665094225928606	ENOG411CQSS	148231023, Xelaev18011830m.g	GenBank, Xenbase_9.1	eif2s3.L	eukaryotic translation initiation factor 2, subunit 3 gamma, 52kDa [Xenopus laevis], NA	P41091, Q2VIR3	EIF2S3, EIF2S3B	EIF2G, NA	Eukaryotic translation initiation factor 2, subunit	0.714476235312344	0.9150730051606918	FALSE	FALSE	FALSE
ENOG411CZJ3	2	19	2	15	0.11920377284128798	-0.9515227627018504	0.1300605405643729	-0.4223005477372369	10.5	8.5	-0.5885384018407409	ENOG411CZJ3	117167935, 148229816, 36939185	GenBank	NA	IsoT protein [Xenopus laevis], ubiquitin specific peptidase 5 (isopeptidase T) [Xenopus laevis], isopeptidase T [Xenopus laevis]	P45974	USP5	ISOT	ubiquitin specific peptidase 5 (isopeptidase T)	0.7219145171138648	0.9150730051606918	FALSE	FALSE	FALSE
ENOG411CYCU	2	9	2	6	0.11920377284128798	-0.9576856408440104	0.1300605405643729	-0.6149456256796328	5.5	4	-0.5928962147666886	ENOG411CYCU	122936453, 148232341, 148234066, Xelaev18021951m.g, Xelaev18047771m.g	GenBank, Xenbase_9.1	Xelaev18021951m.g, Xelaev18047771m.g	LOC100037089 protein [Xenopus laevis], ribosomal protein S2 [Xenopus laevis], uncharacterized protein LOC735074 [Xenopus laevis], NA	P15880	RPS2	RPS4	ribosomal protein S2	0.7233746943040364	0.9150730051606918	FALSE	FALSE	FALSE
ENOG411CSQZ	0	5	0	3	0	-0.8437627157876867	0	-0.685334953571031	2.5	1.5	-0.5966303380458509	ENOG411CSQZ	148222767, Xelaev18019856m.g	GenBank, Xenbase_9.1	atp6v1e1.S	ATPase, H+ transporting, lysosomal 31kDa, V1 subunit E1 [Xenopus laevis], NA	P36543, Q96A05	ATP6V1E1, ATP6V1E2	ATP6E ATP6E2, ATP6E1 ATP6EL2 ATP6V1EL2	ATPase, H transporting, lysosomal 31kDa, V1 subunit	0.7246228942543749	0.9150730051606918	FALSE	FALSE	FALSE
ENOG411CRG5	0	34	0	30	0	-0.8550344903036982	0	-0.27545915940796595	17	15	-0.6046006862421283	ENOG411CRG5	117949832, 124481732, 124481828, 147903066, 147904718, 147904788, 147907369, 156119513, 76779984, Xelaev18013328m.g, Xelaev18044451m.g, Xelaev18015838m.g, Xelaev18047001m.g, Xelaev18047014m.g, Xelaev18044475m.g, Xelaev18044485m.g, Xelaev18044483m.g, Xelaev18047021m.g, Xelaev18013329m.g, Xelaev18015837m.g	GenBank, Xenbase_9.1	tuba4a.L, tubal3.L, tuba1b.S, tubal3.S, tuba4b.S, loc100490289-like.L, Xetrov90024521m.L, Xelaev18044483m.g, Xelaev18047021m.g, tuba1b.L, tuba4a.S	RecName: Full=Tubulin alpha chain, LOC100037141 protein [Xenopus laevis], LOC733365 protein [Xenopus laevis], tubulin, alpha-like 3 [Xenopus laevis], tubulin, alpha 6 [Xenopus laevis], tubulin, alpha 1a [Xenopus laevis], tubulin, alpha 4b [Xenopus laevis], tubulin alpha chain [Xenopus laevis], NA	P68363, Q71U36, P0DPH7, P0DPH8, Q9BQE3, P68366, Q6PEY2	TUBA1B, TUBA1A, TUBA3C, TUBA3D, TUBA1C, TUBA4A, TUBA3E	NA, TUBA3, TUBA2, TUBA6, TUBA1	Tubulin is the major constituent of microtubules. It binds two moles of GTP, one at an exchangeable site on the beta chain and one at a non-exchangeable site on the alpha chain (By similarity)	0.7272778247036296	0.9150730051606918	FALSE	FALSE	FALSE
ENOG411CPTE	1	9	0	10	-0.9133743785268378	0.049006195312205784	-0.8699394594356271	0.037131070900060376	5	5	-0.6112006037929624	ENOG411CPTE	147904649, Xelaev18007547m.g	GenBank, Xenbase_9.1	rplp0.L	ribosomal protein, large, P0 [Xenopus laevis], NA	P05388, Q8NHW5	RPLP0, RPLP0P6	NA	Ribosomal protein, large, P0	0.7294666081424634	0.9150730051606918	FALSE	FALSE	FALSE
ENOG411CVP3	2	8	1	7	-0.45891978196333955	-0.4292647230842246	-0.45490196015678314	-0.27029745429218704	5	4	-0.6280412864639499	ENOG411CVP3	147900927, Xelaev18011177m.g, Xelaev18008550m.g	GenBank, Xenbase_9.1	stoml2.S, stoml2.L	stomatin (EPB72)-like 2 [Xenopus laevis], NA	Q9UJZ1	STOML2	SLP2	stomatin (Epb7.2)-like 2	0.7350115529961466	0.9150730051606918	FALSE	FALSE	FALSE
ENOG411CQIM	1	0	0	0	-0.9133743785268378	0	-0.8699394594356271	0	0.5	0	-0.6458532168183755	ENOG411CQIM	148226471, 148228853, 9757702, Xelaev18006070m.g, Xelaev18035255m.g, Xelaev18037322m.g	GenBank, Xenbase_9.1	tmprss9.L, st14.L, st14.S	matripase b [Xenopus laevis], matriptase a [Xenopus laevis], homolog of human MT-SP1 [Xenopus laevis], NA	Q9Y5Y6	ST14	PRSS14 SNC19 TADG15	suppression of tumorigenicity 14 (colon carcinoma	0.7408127900925022	0.9150730051606918	FALSE	FALSE	FALSE
ENOG411CTV3	1	0	0	0	-0.9133743785268378	0	-0.8699394594356271	0	0.5	0	-0.6458532168183755	ENOG411CTV3	Xelaev18033875m.g, Xelaev18032202m.g	Xenbase_9.1	kiaa1429.S, kiaa1429.L	NA	Q69YN4	VIRMA	KIAA1429	kiaa1429	0.7408127900925022	0.9150730051606918	FALSE	FALSE	FALSE
ENOG411DAC9	1	0	0	0	-0.9133743785268378	0	-0.8699394594356271	0	0.5	0	-0.6458532168183755	ENOG411DAC9	147906643, Xelaev18009701m.g, Xelaev18038511m.g, Xelaev18025429m.g, Xelaev18016891m.g, Xelaev18024802m.g, Xelaev18043707m.g, Xelaev18031609m.g, Xelaev18020325m.g, Xelaev18024725m.g, Xelaev18010311m.g, Xelaev18000037m.g, Xelaev18023368m.g, Xelaev18041989m.g, Xelaev18043671m.g, Xelaev18016769m.g, Xelaev18001135m.g, Xelaev18037802m.g, Xelaev18002959m.g, Xelaev18026897m.g, Xelaev18037683m.g, Xelaev18…	GenBank, Xenbase_9.1	Xelaev18009701m.g, Xelaev18038511m.g, Xelaev18025429m.g, Xelaev18016891m.g, Xelaev18024802m.g, Xelaev18043707m.g, Xelaev18031609m.g, Xelaev18020325m.g, Xelaev18024725m.g, Xelaev18010311m.g, Xelaev18000037m.g, Xelaev18023368m.g, Xelaev18041989m.g, Xelaev18043671m.g, Xelaev18016769m.g, Xelaev18001135m.g, Xelaev18037802m.g, Xelaev18002959m.g, Xelaev18026897m.g, Xelaev18037683m.g, Xelaev18009586m.g, …	uncharacterized protein LOC734625 [Xenopus laevis], NA	NA	NA	NA	L1 transposable element	0.7408127900925022	0.9150730051606918	FALSE	FALSE	FALSE
ENOG411CSB2	1	0	0	0	-0.9133743785268378	0	-0.8699394594356271	0	0.5	0	-0.6458532168183755	ENOG411CSB2	Xelaev18005064m.g	Xenbase_9.1	htt.L	NA	P42858	HTT	HD IT15	huntingtin	0.7408127900925022	0.9150730051606918	FALSE	FALSE	FALSE
ENOG411CXV4	1	0	0	0	-0.9133743785268378	0	-0.8699394594356271	0	0.5	0	-0.6458532168183755	ENOG411CXV4	Xelaev18009783m.g, Xelaev18006251m.g, Xelaev18010610m.g, Xelaev18007784m.g	Xenbase_9.1	sbno2.S, sbno2.L, sbno1.S, sbno1.L	NA	Q9Y2G9, A3KN83	SBNO2, SBNO1	KIAA0963, MOP3	Strawberry notch homolog	0.7408127900925022	0.9150730051606918	FALSE	FALSE	FALSE
ENOG411CWZ5	0	22	0	18	0	-0.9180591459722238	0	-0.37600689546330235	11	9	-0.6491658476472899	ENOG411CWZ5	147899037, 148237590, Xelaev18015312m.g	GenBank, Xenbase_9.1	mdh2.S	malate dehydrogenase 2, NAD (mitochondrial) [Xenopus laevis], NA	P40926	MDH2	NA	malate dehydrogenase 2, NAD (mitochondrial)	0.7418844080220919	0.9150730051606918	FALSE	FALSE	FALSE
ENOG411CS5H	3	14	2	12	-0.30240568630540826	-0.6190676884762244	-0.28497695871447104	-0.306823330317301	8.5	7	-0.6515800719909454	ENOG411CS5H	116283885, 147902055, 148230088, Xelaev18046025m.g	GenBank, Xenbase_9.1	phb.S	MGC64447 protein [Xenopus laevis], prohibitin [Xenopus laevis], uncharacterized protein LOC379509 [Xenopus laevis], NA	P35232	PHB	NA	Prohibitin	0.7426639465899626	0.9150730051606918	FALSE	FALSE	FALSE
ENOG411CVG9	0	4	0	2	0	-0.9394010381235306	0	-0.8373380470160806	2	1	-0.6642568443108309	ENOG411CVG9	148236035, Xelaev18025689m.g	GenBank, Xenbase_9.1	eif3l.S	eukaryotic translation initiation factor 3 subunit L [Xenopus laevis], NA	Q9Y262	EIF3L	EIF3EIP EIF3S6IP	Component of the eukaryotic translation initiation factor 3 (eIF-3) complex, which is required for several steps in the initiation of protein synthesis. The eIF-3 complex associates with the 40S ribosome and facilitates the recruitment of eIF-1, eIF-1A, eIF-2 GTP methionyl-tRNAi and eIF-5 to form the 43S preinitiation complex (43S PIC). The eIF-3 complex stimulates mRNA recruitment to the 43S PIC…	0.7467370315517261	0.9150730051606918	FALSE	FALSE	FALSE
ENOG411CRF7	0	4	0	2	0	-0.9394010381235306	0	-0.8373380470160806	2	1	-0.6642568443108309	ENOG411CRF7	148230436, 148237376, Xelaev18042225m.g, Xelaev18004746m.g	GenBank, Xenbase_9.1	Xelaev18042225m.g, Xelaev18004746m.g	phosphoglycerate kinase 1 [Xenopus laevis], NA	P00558, P07205	PGK1, PGK2	PGKA, PGKB	Phosphoglycerate kinase	0.7467370315517261	0.9150730051606918	FALSE	FALSE	FALSE
ENOG411CTPI	0	4	0	2	0	-0.9394010381235306	0	-0.8373380470160806	2	1	-0.6642568443108309	ENOG411CTPI	148233324, 51968292, Xelaev18002941m.g	GenBank, Xenbase_9.1	psma5.L	proteasome (prosome, macropain) subunit, alpha type, 5 [Xenopus laevis], 20S proteasome alpha5 subunit [Xenopus laevis], NA	P28066	PSMA5	NA	The proteasome is a multicatalytic proteinase complex which is characterized by its ability to cleave peptides with Arg, Phe, Tyr, Leu, and Glu adjacent to the leaving group at neutral or slightly basic pH. The proteasome has an ATP-dependent proteolytic activity (By similarity)	0.7467370315517261	0.9150730051606918	FALSE	FALSE	FALSE
ENOG411CPT1	0	4	0	2	0	-0.9394010381235306	0	-0.8373380470160806	2	1	-0.6642568443108309	ENOG411CPT1	147902026, 148233854	GenBank	NA	peroxiredoxin 6 [Xenopus laevis]	P30041	PRDX6	AOP2 KIAA0106	Peroxiredoxin 6	0.7467370315517261	0.9150730051606918	FALSE	FALSE	FALSE
ENOG411D33R	0	4	0	2	0	-0.9394010381235306	0	-0.8373380470160806	2	1	-0.6642568443108309	ENOG411D33R	148237484, Xelaev18020741m.g, Xelaev18018088m.g	GenBank, Xenbase_9.1	rps17.S, rps17.L	ribosomal protein S17 [Xenopus laevis], NA	P08708	RPS17	RPS17L	ribosomal protein	0.7467370315517261	0.9150730051606918	FALSE	FALSE	FALSE
ENOG411CSRK	0	4	0	2	0	-0.9394010381235306	0	-0.8373380470160806	2	1	-0.6642568443108309	ENOG411CSRK	115528345, 148230114, 213623460, Xelaev18006614m.g, Xelaev18001159m.g	GenBank, Xenbase_9.1	gatad2a.L, gatad2a.S	LOC100158394 protein [Xenopus laevis], GATA zinc finger domain containing 2A [Xenopus laevis], Mi-2 histone deacetylase complex protein 66 [Xenopus laevis], NA	Q86YP4	GATAD2A	NA	GATA zinc finger domain containing 2A	0.7467370315517261	0.9150730051606918	FALSE	FALSE	FALSE
ENOG411CRBG	0	4	0	2	0	-0.9394010381235306	0	-0.8373380470160806	2	1	-0.6642568443108309	ENOG411CRBG	117558137, 161611725, 163916100, Xelaev18005005m.g, Xelaev18008845m.g	GenBank, Xenbase_9.1	immt.L, immt.S	LOC100036792 protein [Xenopus laevis], LOC733343 protein [Xenopus laevis], NA	Q16891	IMMT	HMP MIC60 MINOS2	inner membrane protein, mitochondrial	0.7467370315517261	0.9150730051606918	FALSE	FALSE	FALSE
ENOG411D3ED	0	4	0	2	0	-0.9394010381235306	0	-0.8373380470160806	2	1	-0.6642568443108309	ENOG411D3ED	125948123	GenBank	NA	mitochondrial NADH dehydrogenase ubiquinone 1 alpha subcomplex 13 [Xenopus laevis]	Q9P0J0	NDUFA13	GRIM19	NADH dehydrogenase (ubiquinone) 1 alpha subcomplex	0.7467370315517261	0.9150730051606918	FALSE	FALSE	FALSE
ENOG411CSWJ	0	4	0	2	0	-0.9394010381235306	0	-0.8373380470160806	2	1	-0.6642568443108309	ENOG411CSWJ	147901679, Xelaev18037845m.g, Xelaev18036124m.g	GenBank, Xenbase_9.1	gys1.S, gys1.L	uncharacterized protein LOC431912 [Xenopus laevis], NA	P13807, P54840	GYS1, GYS2	GYS, NA	glycogen synthase	0.7467370315517261	0.9150730051606918	FALSE	FALSE	FALSE
ENOG411CW1C	0	4	0	2	0	-0.9394010381235306	0	-0.8373380470160806	2	1	-0.6642568443108309	ENOG411CW1C	116063394, 262050616, 27882190, 44968437	GenBank	NA	MGC78885 protein [Xenopus laevis], ribosomal protein L17 [Xenopus laevis], RPL17 protein [Xenopus laevis]	P18621	RPL17	NA	ribosomal protein L17	0.7467370315517261	0.9150730051606918	FALSE	FALSE	FALSE
ENOG411CPNE	4	30	3	27	-0.21066065365606895	-0.7301604767212272	-0.19186755432298935	-0.2472138411791458	17	15	-0.665261001173379	ENOG411CPNE	169642429, 171846443, Xelaev18026241m.g, Xelaev18028669m.g	GenBank, Xenbase_9.1	eprs-like.L, eprs-like.S	LOC100158287 protein [Xenopus laevis], LOC100158438 protein [Xenopus laevis], NA	P07814	EPRS	GLNS PARS QARS QPRS	Glutamyl-prolyl-tRNA synthetase	0.7470582150984328	0.9150730051606918	FALSE	FALSE	FALSE
ENOG411CQJT	5	13	4	10	-0.1461133029540556	-0.8448868573593659	-0.13297386526942087	-0.4482957562701814	9	7	-0.7007429335145761	ENOG411CQJT	117558235, 147899177, Xelaev18002816m.g, Xelaev18023628m.g, Xelaev18025634m.g, Xelaev18018966m.g	GenBank, Xenbase_9.1	loc100488028-like.L, loc101734319.L, loc101734319.S, colgalt1.L	Glt25d1b protein [Xenopus laevis], procollagen galactosyltransferase 1-B precursor [Xenopus laevis], NA	Q8IYK4, Q8NBJ5, Q5T4B2	COLGALT2, COLGALT1, CERCAM	C1orf17 GLT25D2 KIAA0584, GLT25D1, CEECAM1 GLT25D3 KIAA1502	glycosyltransferase 25 domain containing	0.7582682713561886	0.9150730051606918	FALSE	FALSE	FALSE
ENOG411CXN8	1	2	0	2	-0.9133743785268378	-0.08517877068950216	-0.8699394594356271	-0.10037245284987478	1.5	1	-0.7060837031860564	ENOG411CXN8	148225977, 148232746, Xelaev18006687m.g, Xelaev18009984m.g, Xelaev18006685m.g	GenBank, Xenbase_9.1	ptgr1.1.L, loc100485344.S, ltb4dh.L	prostaglandin reductase 1, gene 1 [Xenopus laevis], prostaglandin reductase 1, gene 2 [Xenopus laevis], NA	Q14914	PTGR1	LTB4DH	prostaglandin reductase 1	0.7599319571420612	0.9150730051606918	FALSE	FALSE	FALSE
ENOG411D0ZT	1	2	0	2	-0.9133743785268378	-0.08517877068950216	-0.8699394594356271	-0.10037245284987478	1.5	1	-0.7060837031860564	ENOG411D0ZT	130852	GenBank	NA	RecName: Full=Proteasome subunit alpha type-2; AltName: Full=Macropain subunit C3; AltName: Full=Multicatalytic endopeptidase complex subunit C3; Short=xC3; AltName: Full=Proteasome component C3	P25787	PSMA2	HC3 PSC3	The proteasome is a multicatalytic proteinase complex which is characterized by its ability to cleave peptides with Arg, Phe, Tyr, Leu, and Glu adjacent to the leaving group at neutral or slightly basic pH. The proteasome has an ATP-dependent proteolytic activity	0.7599319571420612	0.9150730051606918	FALSE	FALSE	FALSE
ENOG411CW0B	0	8	0	5	0	-1.0049620686768053	0	-0.6853349535710307	4	2.5	-0.7106154935966298	ENOG411CW0B	148230677, 148235885	GenBank	NA	cytochrome c-1 [Xenopus laevis], uncharacterized protein LOC734700 [Xenopus laevis]	P08574	CYC1	NA	Cytochrome c1	0.761338730325316	0.9150730051606918	FALSE	FALSE	FALSE
Xelaev18044446m.g	1	3	0	3	-0.9133743785268378	-0.10433447470007592	-0.8699394594356271	-0.10037245284987478	2	1.5	-0.7196288313903354	Xelaev18044446m.g	NA	Xenbase_9.1	Xelaev18044446m.g	NA	NA	NA	NA	NA	0.7641232222295484	0.9150730051606918	FALSE	FALSE	FALSE
ENOG411D3JZ	2	3	0	4	-1.2921719973331214	0.2738826237906061	-1.4549019601567832	0.22155564203748762	2.5	2	-0.7200393212421139	ENOG411D3JZ	148222601, Xelaev18031332m.g	GenBank, Xenbase_9.1	ndufs6.L	NADH dehydrogenase (ubiquinone) Fe-S protein 6, 13kDa (NADH-coenzyme Q reductase) [Xenopus laevis], NA	O75380	NDUFS6	NA	NADH dehydrogenase (ubiquinone) Fe-S protein 6, 13kDa (NADH-coenzyme Q reductase)	0.7642496071433399	0.9150730051606918	FALSE	FALSE	FALSE
ENOG411CRPT	4	10	4	6	0.16882355704345814	-1.1938199733692332	0.1300605405643729	-0.7524491494295678	7	5	-0.7247819166758651	ENOG411CRPT	147898735, 147903521, 148233018, 31747013, 80477555, Xelaev18031696m.g, Xelaev18033484m.g	GenBank, Xenbase_9.1	cap2.L, cap2.S	similar to adenylyl cyclase-associated protein [Xenopus laevis], CAP, adenylate cyclase-associated protein, 2 [Xenopus laevis], CAP, adenylate cyclase-associated protein 1 [Xenopus laevis], cyclase-associated protein 1b [Xenopus laevis], MGC52725 protein [Xenopus laevis], NA	P40123, Q01518	CAP2, CAP1	NA, CAP	CAP, adenylate cyclase-associated protein	0.7657070843686071	0.9150730051606918	FALSE	FALSE	FALSE
ENOG411CWV7	2	11	2	7	0.11920377284128798	-1.1457695061860969	0.1300605405643729	-0.685334953571031	6.5	4.5	-0.7258915913818553	ENOG411CWV7	148224201, 148224984, 148228651, 148234559, 6630877, Xelaev18006105m.g, Xelaev18042907m.g	GenBank, Xenbase_9.1	plin3.L, Xelaev18042907m.g	uncharacterized protein LOC494638 [Xenopus laevis], perilipin 3 [Xenopus laevis], perilipin 2 [Xenopus laevis], mannose-6-phosphate receptor binding protein 1 [Xenopus laevis], fatvg [Xenopus laevis], NA	Q99541, O60664	PLIN2, PLIN3	ADFP, M6PRBP1 TIP47	Perilipin	0.7660473841478519	0.9150730051606918	FALSE	FALSE	FALSE
ENOG411CQAD	1	5	0	5	-0.9133743785268378	-0.13472677589397158	-0.8699394594356271	-0.10037245284987478	3	2.5	-0.7411194336604031	ENOG411CQAD	126631288, 147900456, 27370913, 44968390, Xelaev18003572m.g	GenBank, Xenbase_9.1	rpl13.L	LOC100049095 protein [Xenopus laevis], ribosomal protein L13 [Xenopus laevis], Similar to ribosomal protein L13 [Xenopus laevis], NA	P26373	RPL13	BBC1	ribosomal protein L13	0.7706894863105062	0.9150730051606918	FALSE	FALSE	FALSE
ENOG411CPN1	1	11	1	7	0.08422900289364679	-1.1457695061860969	0.1300605405643729	-0.685334953571031	6	4	-0.750622488382272	ENOG411CPN1	148236241, Xelaev18009395m.g, Xelaev18005697m.g	GenBank, Xenbase_9.1	aimp1.S, aimp1.L	aminoacyl tRNA synthetase complex-interacting multifunctional protein 1 [Xenopus laevis], NA	Q12904	AIMP1	EMAP2 SCYE1	Aminoacyl tRNA synthetase complex-interacting multifunctional protein 1	0.7735600584127169	0.9150730051606918	FALSE	FALSE	FALSE
ENOG411CR1H	0	1	0	0	0	-1.0650262045334684	0	-1.1003724528498748	0.5	0	-0.7530872513669864	ENOG411CR1H	147899131, 148227956, 80477042	GenBank	NA	tryptophanyl-tRNA synthetase [Xenopus laevis], Unknown (protein for MGC:132108) [Xenopus laevis]	P23381	WARS	IFI53 WRS	Tryptophanyl-tRNA synthetase	0.7743012576116854	0.9150730051606918	FALSE	FALSE	FALSE
ENOG411CURN	0	1	0	0	0	-1.0650262045334684	0	-1.1003724528498748	0.5	0	-0.7530872513669864	ENOG411CURN	148226587, 148238253, Xelaev18041734m.g	GenBank, Xenbase_9.1	bcap31.S	B-cell receptor-associated protein 31 [Xenopus laevis], MGC84076 protein [Xenopus laevis], NA	P51572	BCAP31	BAP31 DXS1357E	B-cell receptor-associated protein 31	0.7743012576116854	0.9150730051606918	FALSE	FALSE	FALSE
ENOG411CV7Z	0	1	0	0	0	-1.0650262045334684	0	-1.1003724528498748	0.5	0	-0.7530872513669864	ENOG411CV7Z	148238130	GenBank	NA	hydroxyacyl-CoA dehydrogenase [Xenopus laevis]	Q16836	HADH	HAD HADHSC SCHAD	hydroxyacyl-CoA dehydrogenase	0.7743012576116854	0.9150730051606918	FALSE	FALSE	FALSE
ENOG411CVMA	0	1	0	0	0	-1.0650262045334684	0	-1.1003724528498748	0.5	0	-0.7530872513669864	ENOG411CVMA	148237896, Xelaev18012424m.g, Xelaev18014721m.g	GenBank, Xenbase_9.1	atg3.L, atg3.S	ubiquitin-like-conjugating enzyme ATG3 [Xenopus laevis], NA	Q9NT62	ATG3	APG3 APG3L	autophagy related 3	0.7743012576116854	0.9150730051606918	FALSE	FALSE	FALSE
ENOG411CZ1J	0	1	0	0	0	-1.0650262045334684	0	-1.1003724528498748	0.5	0	-0.7530872513669864	ENOG411CZ1J	114108317, 49119521, 49258000, 51704155, 60550989, 62185753, 76779684, Xelaev18029009m.g, Xelaev18026759m.g, Xelaev18026758m.g, Xelaev18026753m.g, Xelaev18026756m.g, Xelaev18003832m.g, Xelaev18029010m.g, Xelaev18026757m.g	GenBank, Xenbase_9.1	Xelaev18029009m.g, loc100038305.L, Xetrov90030519m.L, Xelaev18026753m.g, Xelaev18026756m.g, loc100037903.1, Xetrov90030519m.S, Xelaev18026757m.g	LOC733172 protein [Xenopus laevis], LOC443682 protein [Xenopus laevis], LOC443702 protein [Xenopus laevis], LOC446950 protein [Xenopus laevis], Unknown (protein for MGC:132307) [Xenopus laevis], NA	Q6IMI4	SULT6B1	NA	sulfotransferase family, cytosolic, 6B, member 1	0.7743012576116854	0.9150730051606918	FALSE	FALSE	FALSE
ENOG411CQA2	0	1	0	0	0	-1.0650262045334684	0	-1.1003724528498748	0.5	0	-0.7530872513669864	ENOG411CQA2	Xelaev18026974m.g	Xenbase_9.1	epb41l2.L	NA	O43491	EPB41L2	NA	Erythrocyte membrane protein band 4.1-like 2	0.7743012576116854	0.9150730051606918	FALSE	FALSE	FALSE
ENOG411CUW5	0	1	0	0	0	-1.0650262045334684	0	-1.1003724528498748	0.5	0	-0.7530872513669864	ENOG411CUW5	148233670, 52354687, Xelaev18039848m.g, Xelaev18041102m.g	GenBank, Xenbase_9.1	dlgap5.L, dlgap5.S	uncharacterized protein LOC735156 [Xenopus laevis], LOC494809 protein [Xenopus laevis], NA	Q15398	DLGAP5	DLG7 KIAA0008	discs, large (Drosophila) homolog-associated protein 5	0.7743012576116854	0.9150730051606918	FALSE	FALSE	FALSE
ENOG411CT7Y	0	1	0	0	0	-1.0650262045334684	0	-1.1003724528498748	0.5	0	-0.7530872513669864	ENOG411CT7Y	147904320, Xelaev18012800m.g	GenBank, Xenbase_9.1	rfc2.L	replication factor C (activator 1) 2, 40kDa [Xenopus laevis], NA	P35250	RFC2	NA	Replication factor C (Activator 1) 2, 40kDa	0.7743012576116854	0.9150730051606918	FALSE	FALSE	FALSE
ENOG411CP9D	0	1	0	0	0	-1.0650262045334684	0	-1.1003724528498748	0.5	0	-0.7530872513669864	ENOG411CP9D	147904396, Xelaev18037984m.g, Xelaev18036416m.g	GenBank, Xenbase_9.1	akr7a2.S, akr7a2.L	aldo-keto reductase family 7, member A2 (aflatoxin aldehyde reductase) [Xenopus laevis], NA	O43488, Q8NHP1, O95154	AKR7A2, AKR7L, AKR7A3	AFAR AFAR1 AKR7, AFAR3 AKR7A4, AFAR2	aldo-keto reductase family 7, member A2 (aflatoxin aldehyde reductase)	0.7743012576116854	0.9150730051606918	FALSE	FALSE	FALSE
ENOG411CX60	0	1	0	0	0	-1.0650262045334684	0	-1.1003724528498748	0.5	0	-0.7530872513669864	ENOG411CX60	147901790, Xelaev18038579m.g	GenBank, Xenbase_9.1	naa10.L	alpha-N-acetyltransferase 1A [Xenopus laevis], NA	P41227, Q9BSU3	NAA10, NAA11	ARD1 ARD1A TE2, ARD1B ARD2	NatA catalytic subunit	0.7743012576116854	0.9150730051606918	FALSE	FALSE	FALSE
ENOG411D3NM	0	1	0	0	0	-1.0650262045334684	0	-1.1003724528498748	0.5	0	-0.7530872513669864	ENOG411D3NM	148230060, Xelaev18046739m.g	GenBank, Xenbase_9.1	srsf2.S	serine/arginine-rich splicing factor 2 [Xenopus laevis], NA	Q01130	SRSF2	SFRS2	Serine arginine-rich splicing factor 2	0.7743012576116854	0.9150730051606918	FALSE	FALSE	FALSE
ENOG411CY6F	0	1	0	0	0	-1.0650262045334684	0	-1.1003724528498748	0.5	0	-0.7530872513669864	ENOG411CY6F	148232864, 148234114, 148236723, Xelaev18033621m.g	GenBank, Xenbase_9.1	myl12b.S	myosin, light chain 12B, regulatory [Xenopus laevis], MGC81583 protein [Xenopus laevis], myosin, light chain 9, regulatory [Xenopus laevis], NA	P24844, O14950, P19105	MYL9, MYL12B, MYL12A	MLC2 MRLC1 MYRL2, MRLC2 MYLC2B, MLCB MRLC3 RLC	myosin light chain	0.7743012576116854	0.9150730051606918	FALSE	FALSE	FALSE
ENOG411DF1I	0	1	0	0	0	-1.0650262045334684	0	-1.1003724528498748	0.5	0	-0.7530872513669864	ENOG411DF1I	161169050, Xelaev18021771m.g, Xelaev18024574m.g	GenBank, Xenbase_9.1	eif4g2.L, eif4g2.S	eIF4G-related protein NAT1 [Xenopus laevis], NA	NA	NA	NA	Eukaryotic translation initiation factor 4 gamma	0.7743012576116854	0.9150730051606918	FALSE	FALSE	FALSE
ENOG411CUIG	0	1	0	0	0	-1.0650262045334684	0	-1.1003724528498748	0.5	0	-0.7530872513669864	ENOG411CUIG	119352591, 148224409	GenBank	NA	ARP2 actin-related protein 2 [Xenopus laevis], actin-related protein 2-B [Xenopus laevis]	P61160	ACTR2	ARP2	ARP2 actin-related protein 2 homolog (Yeast)	0.7743012576116854	0.9150730051606918	FALSE	FALSE	FALSE
ENOG411CX03	0	1	0	0	0	-1.0650262045334684	0	-1.1003724528498748	0.5	0	-0.7530872513669864	ENOG411CX03	147907411, 148228062, Xelaev18011191m.g	GenBank, Xenbase_9.1	cbs.L	cystathionine-beta-synthase [Xenopus laevis], NA	P0DN79, P35520	CBSL, CBS	NA	Cystathionine-beta-synthase	0.7743012576116854	0.9150730051606918	FALSE	FALSE	FALSE
ENOG411CWB0	0	1	0	0	0	-1.0650262045334684	0	-1.1003724528498748	0.5	0	-0.7530872513669864	ENOG411CWB0	148229156, Xelaev18036862m.g, Xelaev18005235m.g, Xelaev18009011m.g	GenBank, Xenbase_9.1	Xelaev18036862m.g, Xelaev18005235m.g, Xelaev18009011m.g	ubiquitin carboxyl-terminal esterase L1 (ubiquitin thiolesterase) [Xenopus laevis], NA	P09936	UCHL1	NA	Ubiquitin carboxyl-terminal esterase L1 (Ubiquitin thiolesterase)	0.7743012576116854	0.9150730051606918	FALSE	FALSE	FALSE
ENOG411D3TY	0	1	0	0	0	-1.0650262045334684	0	-1.1003724528498748	0.5	0	-0.7530872513669864	ENOG411D3TY	147899408	GenBank	NA	macrophage migration inhibitory factor [Xenopus laevis]	P14174	MIF	GLIF MMIF	macrophage migration inhibitory factor (glycosylation-inhibiting factor)	0.7743012576116854	0.9150730051606918	FALSE	FALSE	FALSE
ENOG411CPM6	0	1	0	0	0	-1.0650262045334684	0	-1.1003724528498748	0.5	0	-0.7530872513669864	ENOG411CPM6	47124949, 76779473, Xelaev18039428m.g, Xelaev18042597m.g	GenBank, Xenbase_9.1	timm50.L, timm50.S	LOC431826 protein [Xenopus laevis], Unknown (protein for IMAGE:7394490) [Xenopus laevis], NA	Q3ZCQ8	TIMM50	TIM50	Translocase of inner mitochondrial membrane 50 homolog (S. cerevisiae)	0.7743012576116854	0.9150730051606918	FALSE	FALSE	FALSE
ENOG411CV73	0	1	0	0	0	-1.0650262045334684	0	-1.1003724528498748	0.5	0	-0.7530872513669864	ENOG411CV73	147903617	GenBank	NA	mitochondrial ribosomal protein L12 [Xenopus laevis]	P52815	MRPL12	MRPL7 RPML12	Mitochondrial ribosomal protein L12	0.7743012576116854	0.9150730051606918	FALSE	FALSE	FALSE
ENOG411CSN9	0	1	0	0	0	-1.0650262045334684	0	-1.1003724528498748	0.5	0	-0.7530872513669864	ENOG411CSN9	147905925, Xelaev18019085m.g	GenBank, Xenbase_9.1	asna1.L	ATPase asna1 [Xenopus laevis], NA	O43681	ASNA1	ARSA TRC40	ATPase required for the post-translational delivery of tail-anchored (TA) proteins to the endoplasmic reticulum. Recognizes and selectively binds the transmembrane domain of TA proteins in the cytosol. This complex then targets to the endoplasmic reticulum by membrane-bound receptors, where the tail- anchored protein is released for insertion. This process is regulated by ATP binding and hydrolys…	0.7743012576116854	0.9150730051606918	FALSE	FALSE	FALSE
ENOG411CUKV	0	1	0	0	0	-1.0650262045334684	0	-1.1003724528498748	0.5	0	-0.7530872513669864	ENOG411CUKV	111185527, 124481898, 125858544, 147902627, 148229642, 351722080, 50415403, 51703510, 51704144, 68533947, Xelaev18001628m.g, Xelaev18001648m.g, Xelaev18047951m.g, Xelaev18036220m.g, Xelaev18001975m.g, Xelaev18001671m.g, Xelaev18047956m.g, Xelaev18036221m.g, Xelaev18001974m.g, Xelaev18036219m.g	GenBank, Xenbase_9.1	gbp4.L, Xelaev18001648m.g, gbp7.S, Xelaev18036220m.g, Xelaev18001975m.g, gbp6.1, gbp5.S, Xelaev18036221m.g, Xelaev18001974m.g, gbp2.L	LOC398692 protein [Xenopus laevis], Unknown (protein for MGC:160143) [Xenopus laevis], LOC100037176 protein [Xenopus laevis], guanylate binding protein 2, interferon-inducible [Xenopus laevis], guanylate binding protein 4 [Xenopus laevis], guanylate binding protein 7 [Xenopus laevis], Unknown (protein for MGC:82969) [Xenopus laevis], MGC82824 protein [Xenopus laevis], LOC446944 protein [Xenopus l…	Q96PP9, Q6ZN66, Q8N8V2	GBP4, GBP6, GBP7	NA, GBP4L	Guanylate binding protein	0.7743012576116854	0.9150730051606918	FALSE	FALSE	FALSE
ENOG411CT9P	0	1	0	0	0	-1.0650262045334684	0	-1.1003724528498748	0.5	0	-0.7530872513669864	ENOG411CT9P	148222765, Xelaev18007044m.g	GenBank, Xenbase_9.1	dhrs4.L	dehydrogenase/reductase (SDR family) member 4 [Xenopus laevis], NA	Q9BTZ2, Q13268, P0CG22, Q6PKH6	DHRS4, DHRS2, DHRS4L1, DHRS4L2	SDR25C2, SDR25C1, SDR25C4, SDR25C3	Dehydrogenase reductase SDR family member	0.7743012576116854	0.9150730051606918	FALSE	FALSE	FALSE
ENOG411DEZI	0	1	0	0	0	-1.0650262045334684	0	-1.1003724528498748	0.5	0	-0.7530872513669864	ENOG411DEZI	Xelaev18045689m.g, Xelaev18045686m.g, Xelaev18045688m.g, Xelaev18045690m.g	Xenbase_9.1	Xelaev18045689m.g, itgax.L, Xelaev18045688m.g, Xelaev18045690m.g	NA	P11215, Q13349	ITGAM, ITGAD	CD11B CR3A, NA	Integrin, alpha	0.7743012576116854	0.9150730051606918	FALSE	FALSE	FALSE
ENOG411CZ2Q	0	1	0	0	0	-1.0650262045334684	0	-1.1003724528498748	0.5	0	-0.7530872513669864	ENOG411CZ2Q	115528355, Xelaev18047384m.g	GenBank, Xenbase_9.1	plekhm3.S	Plekhm3 protein [Xenopus laevis], NA	Q6ZWE6	PLEKHM3	DAPR PLEKHM1L	Pleckstrin homology domain containing, family M, member 3	0.7743012576116854	0.9150730051606918	FALSE	FALSE	FALSE
ENOG411CRFH	0	1	0	0	0	-1.0650262045334684	0	-1.1003724528498748	0.5	0	-0.7530872513669864	ENOG411CRFH	148228847, Xelaev18039178m.g	GenBank, Xenbase_9.1	neu1.L	sialidase 1 (lysosomal sialidase) [Xenopus laevis], NA	Q99519	NEU1	NANH	sialidase 1 (lysosomal sialidase)	0.7743012576116854	0.9150730051606918	FALSE	FALSE	FALSE
ENOG411CRYB	0	1	0	0	0	-1.0650262045334684	0	-1.1003724528498748	0.5	0	-0.7530872513669864	ENOG411CRYB	Xelaev18002839m.g, Xelaev18041759m.g	Xenbase_9.1	huwe1.L, huwe1.S	NA	Q7Z6Z7	HUWE1	KIAA0312 KIAA1578 UREB1	HECT, UBA and WWE domain containing 1, E3 ubiquitin protein ligase	0.7743012576116854	0.9150730051606918	FALSE	FALSE	FALSE
Xelaev18029603m.g	0	1	0	0	0	-1.0650262045334684	0	-1.1003724528498748	0.5	0	-0.7530872513669864	Xelaev18029603m.g	NA	Xenbase_9.1	Xelaev18029603m.g	NA	NA	NA	NA	NA	0.7743012576116854	0.9150730051606918	FALSE	FALSE	FALSE
ENOG411D01C	0	1	0	0	0	-1.0650262045334684	0	-1.1003724528498748	0.5	0	-0.7530872513669864	ENOG411D01C	147899976, 148227544, Xelaev18029715m.g	GenBank, Xenbase_9.1	eif5a.S	hypothetical protein LOC496181 [Xenopus laevis], eukaryotic translation initiation factor 5A [Xenopus laevis], NA	Q9GZV4, P63241, Q6IS14	EIF5A2, EIF5A, EIF5AL1	NA	eukaryotic translation initiation factor	0.7743012576116854	0.9150730051606918	FALSE	FALSE	FALSE
ENOG411CVGN	0	1	0	0	0	-1.0650262045334684	0	-1.1003724528498748	0.5	0	-0.7530872513669864	ENOG411CVGN	148226353	GenBank	NA	uridine 5'-monophosphate synthase [Xenopus laevis]	P11172	UMPS	NA	Uridine monophosphate synthetase	0.7743012576116854	0.9150730051606918	FALSE	FALSE	FALSE
ENOG411CU44	0	1	0	0	0	-1.0650262045334684	0	-1.1003724528498748	0.5	0	-0.7530872513669864	ENOG411CU44	147900524, 46249667, Xelaev18037826m.g, Xelaev18036107m.g	GenBank, Xenbase_9.1	aldh16a1.S, aldh16a1.L	aldehyde dehydrogenase 16 family, member A1 [Xenopus laevis], LOC414586 protein [Xenopus laevis], NA	M0QZ58, Q8IZ83	NA, ALDH16A1	NA	Aldehyde dehydrogenase 16 family, member A1	0.7743012576116854	0.9150730051606918	FALSE	FALSE	FALSE
ENOG411CP6A	0	1	0	0	0	-1.0650262045334684	0	-1.1003724528498748	0.5	0	-0.7530872513669864	ENOG411CP6A	133737022, 148223435, 49255941	GenBank	NA	LOC397932 protein [Xenopus laevis], RAN binding protein 1 [Xenopus laevis]	P43487	RANBP1	NA	Ran binding protein 1	0.7743012576116854	0.9150730051606918	FALSE	FALSE	FALSE
ENOG411CTUS	0	1	0	0	0	-1.0650262045334684	0	-1.1003724528498748	0.5	0	-0.7530872513669864	ENOG411CTUS	148222411, 80477675, Xelaev18005313m.g, Xelaev18042020m.g, Xelaev18038688m.g, Xelaev18009090m.g	GenBank, Xenbase_9.1	tusc3.L, magt1-like.S, magt1-like.L, tusc3.S	magnesium transporter protein 1 precursor [Xenopus laevis], LOC733408 protein [Xenopus laevis], NA	Q9H0U3, Q13454	MAGT1, TUSC3	IAG2, N33	Tumor suppressor candidate 3	0.7743012576116854	0.9150730051606918	FALSE	FALSE	FALSE
ENOG411DGFX	0	1	0	0	0	-1.0650262045334684	0	-1.1003724528498748	0.5	0	-0.7530872513669864	ENOG411DGFX	148224578, Xelaev18044019m.g, Xelaev18046665m.g	GenBank, Xenbase_9.1	lrrc59.L, lrrc59.S	leucine-rich repeat-containing protein 59 [Xenopus laevis], NA	NA	NA	NA	Leucine rich repeat containing 59	0.7743012576116854	0.9150730051606918	FALSE	FALSE	FALSE
ENOG411CWGQ	0	1	0	0	0	-1.0650262045334684	0	-1.1003724528498748	0.5	0	-0.7530872513669864	ENOG411CWGQ	Xelaev18007527m.g, Xelaev18010437m.g	Xenbase_9.1	ttc28-like.L, ttc28-like.S	NA	Q96AY4	TTC28	KIAA1043 TPRBK	tetratricopeptide repeat domain 28	0.7743012576116854	0.9150730051606918	FALSE	FALSE	FALSE
ENOG411CU81	0	1	0	0	0	-1.0650262045334684	0	-1.1003724528498748	0.5	0	-0.7530872513669864	ENOG411CU81	147905905, 148226444, Xelaev18023999m.g	GenBank, Xenbase_9.1	rpn1.L	dolichyl-diphosphooligosaccharide--protein glycosyltransferase subunit 1 precursor [Xenopus laevis], similar to ribophorin I precursor [Xenopus laevis], NA	P04843	RPN1	NA	ribophorin I	0.7743012576116854	0.9150730051606918	FALSE	FALSE	FALSE
ENOG411CPCZ	0	1	0	0	0	-1.0650262045334684	0	-1.1003724528498748	0.5	0	-0.7530872513669864	ENOG411CPCZ	147906651, Xelaev18015712m.g	GenBank, Xenbase_9.1	uchl3.S	ubiquitin carboxyl-terminal esterase L3 (ubiquitin thiolesterase) [Xenopus laevis], NA	P15374	UCHL3	NA	Ubiquitin carboxyl-terminal esterase L3 (Ubiquitin thiolesterase)	0.7743012576116854	0.9150730051606918	FALSE	FALSE	FALSE
ENOG411D30J	0	1	0	0	0	-1.0650262045334684	0	-1.1003724528498748	0.5	0	-0.7530872513669864	ENOG411D30J	148233340, Xelaev18018062m.g	GenBank, Xenbase_9.1	cox5a.L	cytochrome c oxidase subunit Va [Xenopus laevis], NA	P20674	COX5A	NA	Cytochrome c oxidase subunit Va	0.7743012576116854	0.9150730051606918	FALSE	FALSE	FALSE
ENOG411CS3K	0	1	0	0	0	-1.0650262045334684	0	-1.1003724528498748	0.5	0	-0.7530872513669864	ENOG411CS3K	118763700, 148224014, 148229535, 28278760, 50418293, 51703908, 63101474, Xelaev18003165m.g, Xelaev18032594m.g, Xelaev18013640m.g, Xelaev18046104m.g, Xelaev18043363m.g, Xelaev18016094m.g	GenBank, Xenbase_9.1	Xelaev18003165m.g, Xelaev18032594m.g, smarcd1.L, smarcd2.S, smarcd2.L, smarcd1.S	Smarcd1 protein [Xenopus laevis], SWI/SNF related, matrix associated, actin dependent regulator of chromatin, subfamily d, member 2 [Xenopus laevis], SWI/SNF related, matrix associated, actin dependent regulator of chromatin, subfamily d, member 3 [Xenopus laevis], NA	Q6STE5, Q92925, Q96GM5	SMARCD3, SMARCD2, SMARCD1	BAF60C, BAF60B, BAF60A	SWI SNF related, matrix associated, actin dependent regulator of chromatin, subfamily d, member	0.7743012576116854	0.9150730051606918	FALSE	FALSE	FALSE
ENOG411CR1I	0	1	0	0	0	-1.0650262045334684	0	-1.1003724528498748	0.5	0	-0.7530872513669864	ENOG411CR1I	147900117, 147904951, 147905424, 47939811, 49118800, Xelaev18035210m.g, Xelaev18016308m.g, Xelaev18007413m.g, Xelaev18006499m.g, Xelaev18031743m.g, Xelaev18033545m.g, Xelaev18016967m.g, Xelaev18035980m.g, Xelaev18022632m.g, Xelaev18012460m.g, Xelaev18010701m.g, Xelaev18002668m.g, Xelaev18015992m.g, Xelaev18035989m.g, Xelaev18015762m.g, Xelaev18035901m.g, Xelaev18016320m.g, Xelaev18037107m.g, Xela…	GenBank, Xenbase_9.1	Xelaev18035210m.g, Xelaev18016308m.g, Xelaev18007413m.g, Xelaev18006499m.g, Xelaev18031743m.g, Xelaev18033545m.g, Xetrov90007305m.L, Xelaev18035980m.g, Xelaev18022632m.g, Xelaev18012460m.g, Xelaev18010701m.g, Xelaev18002668m.g, Xelaev18015992m.g, loc101733330.L, Xelaev18015762m.g, Xelaev18035901m.g, Xelaev18016320m.g, Xelaev18037107m.g, Xelaev18024213m.g, Xelaev18001202m.g, Xelaev18004024m.g, Xel…	hypothetical protein LOC734925 [Xenopus laevis], TRAF2 and NCK interacting kinase [Xenopus laevis], misshapen-like kinase 1 [Xenopus laevis], LOC432186 protein [Xenopus laevis], LOC443633 protein [Xenopus laevis], NA	Q9UKE5, Q8N4C8	TNIK, MINK1	KIAA0551, B55 MAP4K6 MINK YSK2 ZC3	mitogen-activated protein kinase kinase kinase kinase	0.7743012576116854	0.9150730051606918	FALSE	FALSE	FALSE
ENOG411DG6E	0	1	0	0	0	-1.0650262045334684	0	-1.1003724528498748	0.5	0	-0.7530872513669864	ENOG411DG6E	Xelaev18016854m.g, Xelaev18019902m.g	Xenbase_9.1	rfx4.L, rfx4.S	NA	Q33E94	RFX4	NA	regulatory factor X, 4 (influences HLA class II expression)	0.7743012576116854	0.9150730051606918	FALSE	FALSE	FALSE
ENOG411CPMF	0	1	0	0	0	-1.0650262045334684	0	-1.1003724528498748	0.5	0	-0.7530872513669864	ENOG411CPMF	12642955, 147901772, 148223005, Xelaev18036837m.g, Xelaev18034537m.g	GenBank, Xenbase_9.1	oat.1.S, oat.1.L	ornithine aminotransferase [Xenopus laevis], ornithine aminotransferase (gyrate atrophy) [Xenopus laevis], NA	P04181	OAT	NA	ornithine aminotransferase	0.7743012576116854	0.9150730051606918	FALSE	FALSE	FALSE
ENOG411CSCZ	0	1	0	0	0	-1.0650262045334684	0	-1.1003724528498748	0.5	0	-0.7530872513669864	ENOG411CSCZ	Xelaev18016375m.g, Xelaev18029654m.g, Xelaev18001034m.g, Xelaev18041970m.g, Xelaev18027514m.g, Xelaev18019541m.g, Xelaev18038673m.g	Xenbase_9.1	dlg2-like.2.S, Xelaev18029654m.g, dlg4.S, Xelaev18041970m.g, Xelaev18027514m.g, dlg4.L, Xelaev18038673m.g	NA	Q12959, Q15700, Q92796	DLG1, DLG2, DLG3	NA, KIAA1232	discs large homolog	0.7743012576116854	0.9150730051606918	FALSE	FALSE	FALSE
ENOG411CP9K	0	7	0	4	0	-1.0666880766973068	0	-0.7784443579625124	3.5	2	-0.7542623724435017	ENOG411CP9K	148229429, 148231929, 148232896, 157423224, 213625404, Xelaev18027752m.g, Xelaev18029833m.g, Xelaev18011751m.g	GenBank, Xenbase_9.1	gyg1.L, gyg1.S, gyg2.L	mitotic phosphoprotein 45 [Xenopus laevis], glycogenin 1 [Xenopus laevis], LOC100126641 protein [Xenopus laevis], NA	O15488, P46976	GYG2, GYG1	NA, GYG	Glycogenin	0.774654154193979	0.9150730051606918	FALSE	FALSE	FALSE
ENOG411CX4B	0	7	0	4	0	-1.0666880766973068	0	-0.7784443579625124	3.5	2	-0.7542623724435017	ENOG411CX4B	120538240, 148235381, Xelaev18007420m.g, Xelaev18012678m.g, Xelaev18015303m.g, Xelaev18010365m.g	GenBank, Xenbase_9.1	ap1b1.L, ap2b1.L, ap2b1.S, ap1b1.S	LOC100036849 protein [Xenopus laevis], adaptor-related protein complex 2, beta 1 subunit [Xenopus laevis], NA	P63010, Q10567	AP2B1, AP1B1	ADTB2 CLAPB1, ADTB1 BAM22 CLAPB2	Adaptor-related protein complex 1, beta 1 subunit	0.774654154193979	0.9150730051606918	FALSE	FALSE	FALSE
ENOG411CW1G	4	13	2	12	-0.649714114404157	-0.4179856751035872	-0.6069050536018332	-0.20728765676638655	8.5	7	-0.7549777614323753	ENOG411CW1G	116487658, 147898737, 148229158, 159155766, 54038193, 62471536, Xelaev18001802m.g, Xelaev18002563m.g	GenBank, Xenbase_9.1	tkt.L, tkt.S	LOC780759 protein [Xenopus laevis], transketolase [Xenopus laevis], transketolase-like 2 [Xenopus laevis], LOC779025 protein [Xenopus laevis], NA	P29401, Q9H0I9, P51854	TKT, TKTL2, TKTL1	NA, TKR TKT2	transketolase	0.7748688371185273	0.9150730051606918	FALSE	FALSE	FALSE
ENOG411CWPI	0	10	1	3	1.0324492591630055	-2.14005928895288	1.1300605405643729	-1.559804071487172	5	2	-0.783198562974654	ENOG411CWPI	147906224, 148225606, 2499719, Xelaev18020166m.g, Xelaev18018793m.g	GenBank, Xenbase_9.1	vdac3.S, vdac3.L	voltage-dependent anion channel 3 [Xenopus laevis], voltage-dependent anion-selective channel protein 2 [Xenopus laevis], RecName: Full=Voltage-dependent anion-selective channel protein 2; Short=VDAC-2; AltName: Full=Outer mitochondrial membrane protein porin, NA	P45880, Q9Y277	VDAC2, VDAC3	NA	Voltage-dependent anion channel	0.78324474067844	0.9186672445330093	FALSE	FALSE	FALSE
ENOG411D1AW	0	3	0	1	0	-1.1078025513831327	0	-1.1003724528498748	1.5	0.5	-0.7833346962987718	ENOG411D1AW	147902174	GenBank	NA	uroplakin 3A precursor [Xenopus laevis]	O75631	UPK3A	UPK3	uroplakin 3A	0.7832847032334078	0.9186672445330093	FALSE	FALSE	FALSE
ENOG411CTW2	0	3	0	1	0	-1.1078025513831327	0	-1.1003724528498748	1.5	0.5	-0.7833346962987718	ENOG411CTW2	147900398, 27695014	GenBank	NA	uncharacterized protein LOC398635 [Xenopus laevis], MGC64293 protein [Xenopus laevis]	P07737	PFN1	NA	profilin 1	0.7832847032334078	0.9186672445330093	FALSE	FALSE	FALSE
ENOG411CXU4	0	3	0	1	0	-1.1078025513831327	0	-1.1003724528498748	1.5	0.5	-0.7833346962987718	ENOG411CXU4	148222725, 27769205, Xelaev18010995m.g, Xelaev18008331m.g	GenBank, Xenbase_9.1	oxct1.S, oxct1.L	3-oxoacid CoA transferase 1 [Xenopus laevis], MGC69180 protein [Xenopus laevis], NA	P55809	OXCT1	OXCT SCOT	Key enzyme for ketone body catabolism. Transfers the CoA moiety from succinate to acetoacetate. Formation of the enzyme-CoA intermediate proceeds via an unstable anhydride species formed between the carboxylate groups of the enzyme and substrate (By similarity)	0.7832847032334078	0.9186672445330093	FALSE	FALSE	FALSE
ENOG411D2XS	0	3	0	1	0	-1.1078025513831327	0	-1.1003724528498748	1.5	0.5	-0.7833346962987718	ENOG411D2XS	147901287, Xelaev18033894m.g	GenBank, Xenbase_9.1	hrsp12.S	uncharacterized protein LOC414697 [Xenopus laevis], NA	P52758	RIDA	HRSP12	Heat-responsive protein 12	0.7832847032334078	0.9186672445330093	FALSE	FALSE	FALSE
ENOG411D7QW	1	30	0	31	-0.9133743785268378	-0.20237636613942725	-0.8699394594356271	-0.05456876323674984	15.5	15.5	-0.7889549176674562	ENOG411D7QW	147907262, 148231702, 54648594, Xelaev18017873m.g	GenBank, Xenbase_9.1	MGC97820.L	tubulin, alpha 3d [Xenopus laevis], tubulin, alpha 1a [Xenopus laevis], LOC397931 protein [Xenopus laevis], NA	NA	NA	NA	Tubulin is the major constituent of microtubules. It binds two moles of GTP, one at an exchangeable site on the beta chain and one at a non-exchangeable site on the alpha chain (By similarity)	0.7849308218906077	0.9193367845431091	FALSE	FALSE	FALSE
ENOG411CRNS	4	9	1	10	-1.1738610769241058	0.049006195312205784	-1.1918675543229893	0.037131070900060376	6.5	5.5	-0.7953925146385655	ENOG411CRNS	148225937, 148228482, Xelaev18011171m.g, Xelaev18008541m.g, Xelaev18008524m.g	GenBank, Xenbase_9.1	vwa5a-like.S, vwa5a-like.L, loc101734365.L	von Willebrand factor A domain containing 5A, gene 2 [Xenopus laevis], von Willebrand factor A domain containing 5A [Xenopus laevis], NA	O00534	VWA5A	BCSC1 LOH11CR2A	von Willebrand factor A domain containing 5A	0.7868073936026372	0.9202740376610873	FALSE	FALSE	FALSE
ENOG411CR85	3	44	4	33	0.5263863184554676	-1.662765669807397	0.45198863545173534	-0.5047627079292103	23.5	18.5	-0.8035415453413195	ENOG411CR85	119166, 147902635, 148237059, 213623661, 54038660, 545505, Xelaev18024205m.g	GenBank, Xenbase_9.1	eef1g.S	RecName: Full=Elongation factor 1-gamma-A; Short=EF-1-gamma-A; AltName: Full=eEF-1B gamma-A; AltName: Full=p47, elongation factor 1-gamma-A [Xenopus laevis], elongation factor 1-gamma-B [Xenopus laevis], LOC397861 protein [Xenopus laevis], Unknown (protein for MGC:80886) [Xenopus laevis], elongation factor 1 gamma [Xenopus laevis], NA	P26641	EEF1G	EF1G	eukaryotic translation elongation factor 1 gamma	0.7891691030296544	0.9213648759622508	FALSE	FALSE	FALSE
ENOG411CZFN	5	14	3	12	-0.5208703274664337	-0.6190676884762244	-0.45490196015678314	-0.306823330317301	9.5	7.5	-0.8060579012053923	ENOG411CZFN	13161389, 148222757, Xelaev18030099m.g	GenBank, Xenbase_9.1	Xelaev18030099m.g	ribosomal protein S14 [Xenopus laevis], NA	P62263	RPS14	NA	Ribosomal protein S14	0.7898952679302104	0.9213648759622508	FALSE	FALSE	FALSE
ENOG411CY6E	0	6	0	3	0	-1.1507286926663425	0	-0.9077273749074787	3	1.5	-0.8136880618903013	ENOG411CY6E	148224184, Xelaev18031627m.g, Xelaev18033397m.g	GenBank, Xenbase_9.1	txndc5.L, txndc5.S	thioredoxin domain containing 5 precursor [Xenopus laevis], NA	Q8NBS9	TXNDC5	TLP46	Thioredoxin domain containing 5 (Endoplasmic reticulum)	0.7920881625463722	0.9214086788804737	FALSE	FALSE	FALSE
ENOG411CPQE	0	6	0	3	0	-1.1507286926663425	0	-0.9077273749074787	3	1.5	-0.8136880618903013	ENOG411CPQE	1168993, 1168995, 147907080, Xelaev18022280m.g, Xelaev18041042m.g	GenBank, Xenbase_9.1	cfl1.L, cfl2.S	RecName: Full=Cofilin-1-A; AltName: Full=ADF/cofilin-1; Short=XAC1, RecName: Full=Cofilin-1-B; AltName: Full=ADF/cofilin-2; Short=XAC2, cofilin-2 [Xenopus laevis], NA	P23528, Q9Y281	CFL1, CFL2	CFL, NA	cofilin 2 (muscle)	0.7920881625463722	0.9214086788804737	FALSE	FALSE	FALSE
ENOG411CTG2	2	7	0	8	-1.2921719973331214	0.09915619467556122	-1.4549019601567832	0.06955254859243754	4.5	4	-0.8435895641218727	ENOG411CTG2	147900740, Xelaev18041175m.g, Xelaev18039718m.g	GenBank, Xenbase_9.1	eif5.S, eif5.L	eukaryotic translation initiation factor 5 [Xenopus laevis], NA	P55010	EIF5	NA	Eukaryotic translation initiation factor 5	0.800550601059115	0.9299874509586186	FALSE	FALSE	FALSE
ENOG411CYVD	7	7	3	7	-1.0457689819101703	-0.15944822564928643	-0.8699394594356271	-0.10037245284987478	7	5	-0.8522172602680065	ENOG411CYVD	128414, 147902126, 148225162, 58177282, 64919, Xelaev18004814m.g, Xelaev18020022m.g	GenBank, Xenbase_9.1	Xelaev18004814m.g, Xelaev18020022m.g	RecName: Full=Nucleophosmin; Short=NPM; AltName: Full=Nucleolar phosphoprotein B23; AltName: Full=Nucleolar protein NO38; AltName: Full=Numatrin, hypothetical protein LOC379450 [Xenopus laevis], nucleophosmin [Xenopus laevis], Chain A, The Structure And Function Of Xenopus No38-Core, A Histone Chaperone In The Nucleolus, NO38 [Xenopus laevis], NA	P06748	NPM1	NPM	Nucleophosmin (Nucleolar phosphoprotein B23, numatrin)	0.8029532407582844	0.9312148208240111	FALSE	FALSE	FALSE
ENOG411CS0I	3	18	3	12	0.14609973472051171	-1.3555640060622858	0.1300605405643729	-0.6478602481523679	10.5	7.5	-0.8552203878686149	ENOG411CS0I	148223772, Xelaev18044802m.g	GenBank, Xenbase_9.1	ftcd.L	formiminotransferase cyclodeaminase [Xenopus laevis], NA	O95954	FTCD	NA	Formiminotransferase cyclodeaminase	0.8037854242901991	0.9312148208240111	FALSE	FALSE	FALSE
ENOG411CTBS	0	5	0	2	0	-1.272450710530464	0	-1.1003724528498748	2.5	1	-0.8997585261417318	ENOG411CTBS	148227289, 148234617, 27882053, Xelaev18020905m.g, Xelaev18024024m.g, Xelaev18017866m.g, Xelaev18038088m.g	GenBank, Xenbase_9.1	gdi2.S, Xetrov90012770m.L, gdi2.L, gdi1.L	GDP dissociation inhibitor 2 [Xenopus laevis], GDP dissociation inhibitor 1 [Xenopus laevis], Gdi2-prov protein [Xenopus laevis], NA	P31150, P50395	GDI1, GDI2	GDIL OPHN2 RABGDIA XAP4, RABGDIB	GDP dissociation inhibitor	0.815875615039539	0.9353482283679908	FALSE	FALSE	FALSE
ENOG411CZ0T	0	5	0	2	0	-1.272450710530464	0	-1.1003724528498748	2.5	1	-0.8997585261417318	ENOG411CZ0T	148232661, 148236189, 33331487	GenBank	NA	uncharacterized protein LOC379339 [Xenopus laevis], ferritin light chain, oocyte isoform [Xenopus laevis], ferritin light chain [Xenopus laevis]	NA	NA	NA	Stores iron in a soluble, non-toxic, readily available form. Important for iron homeostasis	0.815875615039539	0.9353482283679908	FALSE	FALSE	FALSE
ENOG411DG53	2	0	0	0	-1.2921719973331214	0	-1.4549019601567832	0	1	0	-0.9137035817736154	ENOG411DG53	32766509, Xelaev18014768m.g, Xelaev18012379m.g	GenBank, Xenbase_9.1	sytl5.S, sytl5.L	LOC398672 protein [Xenopus laevis], NA	NA	NA	NA	synaptotagmin-like 5	0.8195636892739981	0.9353482283679908	FALSE	FALSE	FALSE
ENOG411CSB0	5	29	4	23	-0.1461133029540556	-1.1612573963209671	-0.13297386526942087	-0.4223005477372369	17	13.5	-0.9244506869819671	ENOG411CSB0	147905294, 148232786, 4973189, Xelaev18028947m.g	GenBank, Xenbase_9.1	tcp1.S	similar to t-complex polypeptide 1 [Xenopus laevis], t-complex 1 [Xenopus laevis], t-complex polypeptide 1 [Xenopus laevis], NA	P17987	TCP1	CCT1 CCTA	T-complex protein 1 subunit alpha	0.8223741425128791	0.9353482283679908	FALSE	FALSE	FALSE
ENOG411CRZ4	2	12	1	9	-0.45891978196333955	-0.8654949604802777	-0.45490196015678314	-0.4788840761036044	7	5	-0.9365026454853165	ENOG411CRZ4	147904294, 205360882	GenBank	NA	RAN, member RAS oncogene family [Xenopus laevis]	P62826	RAN	ARA24	RAN member RAS oncogene family	0.8254927744358689	0.9353482283679908	FALSE	FALSE	FALSE
ENOG411CXAH	0	27	0	20	0	-1.3395081500672967	0	-0.5154099521287183	13.5	10	-0.947175296367233	ENOG411CXAH	1326169, 1439611, 147906703, 50417653, Xelaev18038451m.g	GenBank, Xenbase_9.1	hspa5.L	immunoglobulin binding protein [Xenopus laevis], heavy-chain binding protein BiP [Xenopus laevis], heat shock 70kDa protein 5 (glucose-regulated protein, 78kDa) precursor [Xenopus laevis], LOC397850 protein [Xenopus laevis], NA	P11021	HSPA5	GRP78	Heat shock 70kDa protein 5 (Glucose-regulated protein, 78kDa)	0.8282252693619482	0.9353482283679908	FALSE	FALSE	FALSE
ENOG411D110	1	8	0	7	-0.9133743785268378	-0.4292647230842246	-0.8699394594356271	-0.27029745429218704	4.5	3.5	-0.9493892134353962	ENOG411D110	171846704, Xelaev18022814m.g	GenBank, Xenbase_9.1	aars.L	LOC100158432 protein [Xenopus laevis], NA	P49588	AARS	NA	alanyl-tRNA synthetase	0.8287886528139731	0.9353482283679908	FALSE	FALSE	FALSE
ENOG411CVJG	1	6	0	5	-0.9133743785268378	-0.4497699657630322	-0.8699394594356271	-0.32276487418632255	3.5	2.5	-0.9638886095834569	ENOG411CVJG	148232429, 148234413, 214739, 229891737, 6730350, Xelaev18016045m.g, Xelaev18013580m.g	GenBank, Xenbase_9.1	tarbp2.S, tarbp2.L	RISC-loading complex subunit tarbp2 [Xenopus laevis], protein kinase, interferon-inducible double stranded RNA dependent activator [Xenopus laevis], RNA binding protein [Xenopus laevis], RecName: Full=RISC-loading complex subunit tarbp2, Chain A, Crystal Structure Of A Dsrna-Binding Domain Complexed With Dsrna: Molecular Basis Of Double-Stranded Rna-Protein Interactions, NA	O75569, Q15633	PRKRA, TARBP2	PACT RAX, TRBP	Protein kinase, interferon-inducible double stranded RNA dependent activator	0.8324491124518907	0.9353482283679908	FALSE	FALSE	FALSE
ENOG411CP8P	2	2	0	2	-1.2921719973331214	-0.08517877068950216	-1.4549019601567832	-0.10037245284987478	2	1	-0.9739340681412963	ENOG411CP8P	123959706, 14029826, 147900788, 148235076	GenBank	NA	LOC100037107 protein [Xenopus laevis], myosin light chain 1av [Xenopus laevis], myosin, light chain 3, alkali; ventricular, skeletal, slow [Xenopus laevis]	P12829, P08590	MYL4, MYL3	MLC1, NA	myosin light chain	0.834955361583822	0.9353482283679908	FALSE	FALSE	FALSE
ENOG411CXCD	7	40	6	32	-0.05541194742135457	-1.3308283434823374	-0.06258453737802286	-0.4135303381095048	23.5	19	-0.9802199100520128	ENOG411CXCD	147906202, 44968271, 67678232, Xelaev18014277m.g, Xelaev18011525m.g	GenBank, Xenbase_9.1	cct8.S, cct8.L	chaperonin containing TCP1, subunit 8 (theta) [Xenopus laevis], chaperonin subunit 8 theta [Xenopus laevis], Unknown (protein for MGC:114776) [Xenopus laevis], NA	P50990	CCT8	C21orf112 CCTQ KIAA0002	chaperonin containing Tcp1, subunit 8 (theta)	0.8365112107116497	0.9353482283679908	FALSE	FALSE	FALSE
ENOG411CUSF	3	38	2	32	-0.30240568630540826	-1.093923198143661	-0.28497695871447104	-0.3413805523536696	20.5	17	-0.987353622960584	ENOG411CUSF	120577579, 123604, 1255995, 1322309, 148222597, 148229965, 148234722, 291290899, 50415517, Xelaev18035213m.g, Xelaev18039768m.g	GenBank, Xenbase_9.1	hspa8.L, hspa2.L	LOC100037033 protein [Xenopus laevis], RecName: Full=Heat shock 70 kDa protein; Short=HSP70, heat shock cognate 70.I [Xenopus laevis], heat shock cognate 70.II [Xenopus laevis], heat shock 70kDa protein 1-like [Xenopus laevis], heat shock 70kDa protein 2 [Xenopus laevis], heat shock 70kDa protein 8 [Xenopus laevis], heat shock 70kDa protein 1A [Xenopus laevis], Hsp70 protein [Xenopus laevis], NA	P48741, P0DMV8, P0DMV9, P11142, P34931, P54652, P17066	HSPA7, HSPA1A, HSPA1B, HSPA8, HSPA1L, HSPA2, HSPA6	HSP70B, HSP72 HSPA1 HSX70, HSP72, HSC70 HSP73 HSPA10, NA, HSP70B'	Heat shock 70kDa protein	0.8382653442787349	0.9353482283679908	FALSE	FALSE	FALSE
ENOG411CWIP	2	3	0	3	-1.2921719973331214	-0.10433447470007592	-1.4549019601567832	-0.10037245284987478	2.5	1.5	-0.9874791963455753	ENOG411CWIP	13021672, 148233253, 161612269, Xelaev18045869m.g	GenBank, Xenbase_9.1	fkbp10.S	FK506-binding protein [Xenopus laevis], FK506 binding protein 10, 65 kDa precursor [Xenopus laevis], NA	Q96AY3	FKBP10	FKBP65	FK506 binding protein 10, 65 kDa	0.8382961116948731	0.9353482283679908	FALSE	FALSE	FALSE
ENOG411CS0R	2	4	1	2	-0.45891978196333955	-0.9394010381235306	-0.45490196015678314	-0.8373380470160806	3	1.5	-0.9887621341577602	ENOG411CS0R	148222150, 148224496, 148227844, 148230849, 28422226, 963083, 963085, Xelaev18035488m.g	GenBank, Xenbase_9.1	pdgfb-like.L	protein phosphatase 2, regulatory subunit A, alpha [Xenopus laevis], similar to phosphorylase phosphatase [Xenopus laevis], protein phosphatase 2, regulatory subunit A, beta [Xenopus laevis], LOC398563 protein [Xenopus laevis], phosphorylase phosphatase [Xenopus laevis], NA	P30154, P30153	PPP2R1B, PPP2R1A	NA	protein phosphatase 2, regulatory subunit A	0.8386102326544902	0.9353482283679908	FALSE	FALSE	FALSE
ENOG411CQAE	3	3	1	2	-0.8547611711384113	-0.5525963577748395	-0.8699394594356271	-0.5154099521287187	3	1.5	-0.9951520522485021	ENOG411CQAE	147903533, 148227748, 77748187, Xelaev18011839m.g	GenBank, Xenbase_9.1	pdha1.L	pyruvate dehydrogenase (lipoamide) alpha 1 [Xenopus laevis], Pdha1-B-prov protein [Xenopus laevis], NA	P08559, P29803	PDHA1, PDHA2	PHE1A, PDHAL	Pyruvate dehydrogenase (Lipoamide) alpha	0.8401688411795704	0.9353482283679908	FALSE	FALSE	FALSE
ENOG411CZE3	1	4	0	3	-0.9133743785268378	-0.499284043369929	-0.8699394594356271	-0.4223005477372369	2.5	1.5	-0.9989003496234906	ENOG411CZE3	129700, 148225667, 148235535, Xelaev18020338m.g	GenBank, Xenbase_9.1	pcna.S	RecName: Full=Proliferating cell nuclear antigen; Short=PCNA; AltName: Full=Cyclin, similar to proliferating cell nuclear antigen [Xenopus laevis], proliferating cell nuclear antigen [Xenopus laevis], NA	P12004	PCNA	NA	This protein is an auxiliary protein of DNA polymerase delta and is involved in the control of eukaryotic DNA replication by increasing the polymerase's processibility during elongation of the leading strand (By similarity)	0.8410785165710061	0.9353482283679908	FALSE	FALSE	FALSE
ENOG411CQT9	2	5	0	5	-1.2921719973331214	-0.13472677589397158	-1.4549019601567832	-0.10037245284987478	3.5	2.5	-1.0089697986156432	ENOG411CQT9	147900249	GenBank	NA	probable 2-oxoglutarate dehydrogenase E1 component DHKTD1, mitochondrial precursor [Xenopus laevis]	Q96HY7	DHTKD1	KIAA1630	dehydrogenase E1 and transketolase domain containing 1	0.8435054407146174	0.9353482283679908	FALSE	FALSE	FALSE
ENOG411CZY6	3	16	1	14	-0.8547611711384113	-0.6076062779561394	-0.8699394594356271	-0.2809446984916956	9.5	7.5	-1.0340499398412302	ENOG411CZY6	147903625, 148222432, 38051919	GenBank	NA	uncharacterized protein LOC398959 [Xenopus laevis], chaperonin containing TCP1, subunit 4 (delta) [Xenopus laevis], LOC398959 protein [Xenopus laevis]	P50991	CCT4	CCTD SRB	chaperonin containing TCP1, subunit 4 (delta)	0.849443591363108	0.9353482283679908	FALSE	FALSE	FALSE
ENOG411CT4Q	0	4	0	1	0	-1.4673124046879549	0	-1.4223005477372368	2	0.5	-1.0375465514739926	ENOG411CT4Q	66912037, Xelaev18021503m.g	GenBank, Xenbase_9.1	rars.S	LOC733251 protein [Xenopus laevis], NA	P54136	RARS	NA	Arginyl-tRNA synthetase	0.8502593937679435	0.9353482283679908	FALSE	FALSE	FALSE
ENOG411D03B	0	4	0	1	0	-1.4673124046879549	0	-1.4223005477372368	2	0.5	-1.0375465514739926	ENOG411D03B	148234279, Xelaev18034646m.g	GenBank, Xenbase_9.1	mrpl43.L	mitochondrial ribosomal protein L43 [Xenopus laevis], NA	Q8N983	MRPL43	NA	Mitochondrial ribosomal protein L43	0.8502593937679435	0.9353482283679908	FALSE	FALSE	FALSE
ENOG411CRMA	0	10	0	5	0	-1.4861065586037963	0	-0.9748415707660155	5	2.5	-1.0508360251545477	ENOG411CRMA	148234425, Xelaev18001932m.g, Xelaev18022721m.g	GenBank, Xenbase_9.1	gpi.S, gpi.L	glucose-6-phosphate isomerase [Xenopus laevis], NA	P06744	GPI	NA	glucose-6-phosphate isomerase	0.8533330465250784	0.9353482283679908	FALSE	FALSE	FALSE
ENOG411CTI5	0	2	0	0	0	-1.5062626217630222	0	-1.6853349535710311	1	0	-1.0650885140964605	ENOG411CTI5	148228633, 18157370, 27924450, 47499204, Xelaev18012862m.g	GenBank, Xenbase_9.1	c1qbp.L	complement component 1, q subcomponent binding protein [Xenopus laevis], 38k protein [Xenopus laevis], LOC398432 protein [Xenopus laevis], NA	Q07021	C1QBP	GC1QBP HABP1 SF2P32	complement component 1, q subcomponent binding protein	0.856582061768581	0.9353482283679908	FALSE	FALSE	FALSE
ENOG411CU95	0	2	0	0	0	-1.5062626217630222	0	-1.6853349535710311	1	0	-1.0650885140964605	ENOG411CU95	147906917, 155369253, 213626628, 28461388, 30141904, 51258756, Xelaev18015656m.g	GenBank, Xenbase_9.1	ipo5.S	karyopherin-beta 3 variant [Xenopus laevis], importin 5 [Xenopus laevis], Karyopherin-beta 3 variant [Xenopus laevis], Kap beta 3 protein [Xenopus laevis], karyopherin beta 3 protein [Xenopus laevis], NA	O00410, O60518	IPO5, RANBP6	KPNB3 RANBP5, NA	Importin 5	0.856582061768581	0.9353482283679908	FALSE	FALSE	FALSE
ENOG411CSIE	0	2	0	0	0	-1.5062626217630222	0	-1.6853349535710311	1	0	-1.0650885140964605	ENOG411CSIE	147900273, 148225248, 47937571, 6006270	GenBank	NA	SET nuclear oncogene [Xenopus laevis], MGC64240 protein [Xenopus laevis], TAF-Ibeta2 [Xenopus laevis]	NA	NA	NA	Nucleosome assembly protein (NAP)	0.856582061768581	0.9353482283679908	FALSE	FALSE	FALSE
ENOG411CXA2	0	2	0	0	0	-1.5062626217630222	0	-1.6853349535710311	1	0	-1.0650885140964605	ENOG411CXA2	111598432, 148229575, 148234496, Xelaev18032698m.g, Xelaev18025724m.g, Xelaev18030469m.g, Xelaev18025723m.g, Xelaev18023731m.g, Xelaev18023732m.g	GenBank, Xenbase_9.1	loc100492858.S, tst.S, loc100492858.L, mpst.S, mpst.L, tst.L	Mpst protein [Xenopus laevis], thiosulfate sulfurtransferase (rhodanese) [Xenopus laevis], thiosulfate sulfurtransferase [Xenopus laevis], NA	P25325, Q16762	MPST, TST	TST2, NA	sulfurtransferase	0.856582061768581	0.9353482283679908	FALSE	FALSE	FALSE
ENOG411CRZQ	0	2	0	0	0	-1.5062626217630222	0	-1.6853349535710311	1	0	-1.0650885140964605	ENOG411CRZQ	147907224, 148229248, Xelaev18037185m.g	GenBank, Xenbase_9.1	pgd.S	6-phosphogluconate dehydrogenase, decarboxylating [Xenopus laevis], uncharacterized protein LOC735164 [Xenopus laevis], NA	P52209	PGD	PGDH	Catalyzes the oxidative decarboxylation of 6- phosphogluconate to ribulose 5-phosphate and CO(2), with concomitant reduction of NADP to NADPH (By similarity)	0.856582061768581	0.9353482283679908	FALSE	FALSE	FALSE
ENOG411CQ5J	0	2	0	0	0	-1.5062626217630222	0	-1.6853349535710311	1	0	-1.0650885140964605	ENOG411CQ5J	148223471, 148230452, Xelaev18046381m.g	GenBank, Xenbase_9.1	cox4i2.S	uncharacterized protein LOC379593 [Xenopus laevis], cytochrome c oxidase subunit IV isoform 2 (lung) [Xenopus laevis], NA	Q96KJ9	COX4I2	COX4L2	cytochrome c oxidase subunit IV isoform 2 (lung)	0.856582061768581	0.9353482283679908	FALSE	FALSE	FALSE
ENOG411D1KD	0	2	0	0	0	-1.5062626217630222	0	-1.6853349535710311	1	0	-1.0650885140964605	ENOG411D1KD	148227870, 148234054, 50603672	GenBank	NA	prolyl isomerase Pin1 b [Xenopus laevis], peptidylprolyl cis/trans isomerase, NIMA-interacting 1 [Xenopus laevis], Unknown (protein for IMAGE:4058360) [Xenopus laevis]	Q13526, O15428	PIN1, PIN1P1	NA, PIN1L	(peptidyl-prolyl cis trans isomerase) NIMA-interacting 1	0.856582061768581	0.9353482283679908	FALSE	FALSE	FALSE
ENOG411CUK5	0	2	0	0	0	-1.5062626217630222	0	-1.6853349535710311	1	0	-1.0650885140964605	ENOG411CUK5	52138966, Xelaev18034544m.g	GenBank, Xenbase_9.1	acadsb.L	LOC494679 protein [Xenopus laevis], NA	P45954	ACADSB	NA	acyl-CoA dehydrogenase, short branched chain	0.856582061768581	0.9353482283679908	FALSE	FALSE	FALSE
ENOG411CYXV	0	2	0	0	0	-1.5062626217630222	0	-1.6853349535710311	1	0	-1.0650885140964605	ENOG411CYXV	Xelaev18043950m.g	Xenbase_9.1	nfs1.L	NA	H0YGN5, H7C0I5, Q9Y697	NA, NFS1	NA, NIFS	NFS1 nitrogen fixation 1 homolog (S. cerevisiae)	0.856582061768581	0.9353482283679908	FALSE	FALSE	FALSE
ENOG411CVXP	0	2	0	0	0	-1.5062626217630222	0	-1.6853349535710311	1	0	-1.0650885140964605	ENOG411CVXP	147906799, 148223649, 148227896, 148231603, 66910774, Xelaev18044062m.g, Xelaev18047789m.g, Xelaev18046704m.g, Xelaev18045557m.g	GenBank, Xenbase_9.1	llgl2.L, llgl1.S, llgl2.S, llgl1.L	lethal giant larvae homolog 1 [Xenopus laevis], MGC80416 protein [Xenopus laevis], lethal giant larvae homolog 2 [Xenopus laevis], lethal giant larvae [Xenopus laevis], NA	Q15334, Q6P1M3	LLGL1, LLGL2	DLG4 HUGL HUGL1, NA	Lethal giant larvae homolog	0.856582061768581	0.9353482283679908	FALSE	FALSE	FALSE
ENOG411CUS9	0	2	0	0	0	-1.5062626217630222	0	-1.6853349535710311	1	0	-1.0650885140964605	ENOG411CUS9	1090518, 147900999, 189217818, 50603997, Xelaev18046457m.g, Xelaev18043706m.g, Xelaev18047433m.g	GenBank, Xenbase_9.1	fscn2.S, fscn2.L, fscn1.S	fascin, fascin [Xenopus laevis], fascin homolog 2, actin-bundling protein, retinal [Xenopus laevis], FSCN1 protein [Xenopus laevis], NA	Q16658, O14926	FSCN1, FSCN2	FAN1 HSN SNL, NA	fascin homolog 2, actin-bundling protein, retinal (Strongylocentrotus purpuratus)	0.856582061768581	0.9353482283679908	FALSE	FALSE	FALSE
ENOG411CWCC	0	2	0	0	0	-1.5062626217630222	0	-1.6853349535710311	1	0	-1.0650885140964605	ENOG411CWCC	13021687, 148224084, 157415960, Xelaev18004597m.g	GenBank, Xenbase_9.1	hnrnpab.L	CArG-binding factor A [Xenopus laevis], heterogeneous nuclear ribonucleoprotein A/B [Xenopus laevis], Vg1 mRNA binding protein 40 [Xenopus laevis], NA	Q99729	HNRNPAB	ABBP1 HNRPAB	heterogeneous nuclear ribonucleoprotein A B	0.856582061768581	0.9353482283679908	FALSE	FALSE	FALSE
ENOG411CXN9	0	2	0	0	0	-1.5062626217630222	0	-1.6853349535710311	1	0	-1.0650885140964605	ENOG411CXN9	148227952, Xelaev18017996m.g	GenBank, Xenbase_9.1	idh3a.L	isocitrate dehydrogenase 3 (NAD+) alpha [Xenopus laevis], NA	P50213	IDH3A	NA	isocitrate dehydrogenase 3 (NAD ) alpha	0.856582061768581	0.9353482283679908	FALSE	FALSE	FALSE
ENOG411CQCJ	0	2	0	0	0	-1.5062626217630222	0	-1.6853349535710311	1	0	-1.0650885140964605	ENOG411CQCJ	11527245, Xelaev18035684m.g, Xelaev18037537m.g	GenBank, Xenbase_9.1	cdc42.L, cdc42.S	Rho GTPase Cdc42 [Xenopus laevis], NA	P60953	CDC42	NA	cell division cycle 42 (GTP binding protein, 25kDa)	0.856582061768581	0.9353482283679908	FALSE	FALSE	FALSE
ENOG411CPPR	0	2	0	0	0	-1.5062626217630222	0	-1.6853349535710311	1	0	-1.0650885140964605	ENOG411CPPR	122936449, Xelaev18042649m.g	GenBank, Xenbase_9.1	ivd.S	LOC733389 protein [Xenopus laevis], NA	P26440	IVD	NA	Isovaleryl-CoA dehydrogenase	0.856582061768581	0.9353482283679908	FALSE	FALSE	FALSE
ENOG411CVSF	0	2	0	0	0	-1.5062626217630222	0	-1.6853349535710311	1	0	-1.0650885140964605	ENOG411CVSF	418252, Xelaev18000573m.g	GenBank, Xenbase_9.1	vcl.S	RecName: Full=Vinculin; AltName: Full=Metavinculin, NA	P18206	VCL	NA	Vinculin	0.856582061768581	0.9353482283679908	FALSE	FALSE	FALSE
ENOG411CYRJ	0	2	0	0	0	-1.5062626217630222	0	-1.6853349535710311	1	0	-1.0650885140964605	ENOG411CYRJ	147900167, 147904058, Xelaev18004444m.g, Xelaev18000755m.g	GenBank, Xenbase_9.1	prkcsh.L, prkcsh.S	protein kinase C substrate 80K-H precursor [Xenopus laevis], MGC84105 protein precursor [Xenopus laevis], NA	P14314	PRKCSH	G19P1	Protein kinase C substrate 80K-H	0.856582061768581	0.9353482283679908	FALSE	FALSE	FALSE
ENOG411D159	0	2	0	0	0	-1.5062626217630222	0	-1.6853349535710311	1	0	-1.0650885140964605	ENOG411D159	148225879, Xelaev18039850m.g, Xelaev18041101m.g, Xelaev18039640m.g	GenBank, Xenbase_9.1	loc100496148.L, lgals3.S, loc100492447.L	lectin, galactoside-binding, soluble, 3 [Xenopus laevis], NA	P17931	LGALS3	MAC2	Lectin galactoside-binding soluble 3	0.856582061768581	0.9353482283679908	FALSE	FALSE	FALSE
ENOG411CPCX	0	2	0	0	0	-1.5062626217630222	0	-1.6853349535710311	1	0	-1.0650885140964605	ENOG411CPCX	148226520, Xelaev18012617m.g, Xelaev18004050m.g	GenBank, Xenbase_9.1	ak2.L, ak2.S	adenylate kinase 2, mitochondrial [Xenopus laevis], NA	P54819	AK2	ADK2	Adenylate kinase 2	0.856582061768581	0.9353482283679908	FALSE	FALSE	FALSE
ENOG411CQ14	0	2	0	0	0	-1.5062626217630222	0	-1.6853349535710311	1	0	-1.0650885140964605	ENOG411CQ14	123909821, 148232140, 608537, Xelaev18009899m.g	GenBank, Xenbase_9.1	elavl1.S	RecName: Full=ELAV-like protein 1-A; AltName: Full=36 kDa embryonic-type cytoplasmic polyadenylation element-binding protein; Short=36 kDa eCPE-binding protein; Short=36 kDa eCPEB; Short=p36; AltName: Full=Protein ElrA-A; Short=ElrA, ELAV-like protein 1-B [Xenopus laevis], ribonucleoprotein [Xenopus laevis], NA	Q15717	ELAVL1	HUR	ELAV (Embryonic lethal, abnormal vision, Drosophila)-like 1 (Hu antigen R)	0.856582061768581	0.9353482283679908	FALSE	FALSE	FALSE
ENOG411CTZI	0	2	0	0	0	-1.5062626217630222	0	-1.6853349535710311	1	0	-1.0650885140964605	ENOG411CTZI	147906376, 51593150, Xelaev18024904m.g	GenBank, Xenbase_9.1	psmd7.S	proteasome (prosome, macropain) 26S subunit, non-ATPase, 7 [Xenopus laevis], MGC84052 protein [Xenopus laevis], NA	P51665	PSMD7	MOV34L	Proteasome (Prosome, macropain) 26S subunit, non-ATPase, 7	0.856582061768581	0.9353482283679908	FALSE	FALSE	FALSE
4098346	0	2	0	0	0	-1.5062626217630222	0	-1.6853349535710311	1	0	-1.0650885140964605	4098346	NA	GenBank	NA	alpha tropomyosin [Xenopus laevis]	NA	NA	NA	NA	0.856582061768581	0.9353482283679908	FALSE	FALSE	FALSE
ENOG411DDN4	0	2	0	0	0	-1.5062626217630222	0	-1.6853349535710311	1	0	-1.0650885140964605	ENOG411DDN4	147906893, 148233078	GenBank	NA	phosphoglycerate mutase 1 (brain) [Xenopus laevis], MGC82549 protein [Xenopus laevis]	P18669, Q8N0Y7	PGAM1, PGAM4	PGAMA, PGAM3	PGAM	0.856582061768581	0.9353482283679908	FALSE	FALSE	FALSE
ENOG411CT5Q	0	2	0	0	0	-1.5062626217630222	0	-1.6853349535710311	1	0	-1.0650885140964605	ENOG411CT5Q	148228480, Xelaev18041060m.g, Xelaev18039908m.g	GenBank, Xenbase_9.1	srsf5.S, srsf5.L	serine/arginine-rich splicing factor 5 [Xenopus laevis], NA	Q13243	SRSF5	HRS SFRS5 SRP40	Serine arginine-rich splicing factor 5	0.856582061768581	0.9353482283679908	FALSE	FALSE	FALSE
ENOG411DAI7	0	2	0	0	0	-1.5062626217630222	0	-1.6853349535710311	1	0	-1.0650885140964605	ENOG411DAI7	Xelaev18038369m.g	Xenbase_9.1	surf1.L	NA	NA	NA	NA	surfeit 1	0.856582061768581	0.9353482283679908	FALSE	FALSE	FALSE
ENOG411CPA9	8	15	6	10	-0.29867653041155273	-1.2370919453432627	-0.23250953882033518	-0.6409408342125774	11.5	8	-1.085952303538758	ENOG411CPA9	147903835, Xelaev18038198m.g	GenBank, Xenbase_9.1	rpl12.L	ribosomal protein L12 [Xenopus laevis], NA	P30050	RPL12	NA	Ribosomal protein L12	0.8612499526036804	0.9382436832244206	FALSE	FALSE	FALSE
ENOG411CZ2P	3	9	1	7	-0.8547611711384113	-0.6821486370094154	-0.8699394594356271	-0.4223005477372369	6	4	-1.086759347413444	ENOG411CZ2P	13021648, 147901825, 148237181	GenBank	NA	peptidyl-prolyl cis-trans isomerase B [Xenopus laevis], uncharacterized protein LOC495270 [Xenopus laevis]	P23284	PPIB	CYPB	PPIases accelerate the folding of proteins (By similarity)	0.8614284109136494	0.9382436832244206	FALSE	FALSE	FALSE
ENOG411CXU8	1	12	0	10	-0.9133743785268378	-0.6364809733870017	-0.8699394594356271	-0.3413805523536696	6.5	5	-1.0959132291965388	ENOG411CXU8	112688, 1360640, 147899826, 147901574, 148233284, 285026416, 2895520, Xelaev18028033m.g, Xelaev18033916m.g	GenBank, Xenbase_9.1	ywhaq.L, ywhaz.S	RecName: Full=14-3-3-like protein, 14-3-3 zeta protein [Xenopus laevis], 14-3-3 protein zeta a [Xenopus laevis], 14-3-3 protein beta/alpha-B [Xenopus laevis], 14-3-3 protein zeta [Xenopus laevis], 14-3-3-like protein [Xenopus laevis], NA	P31946, P63104	YWHAB, YWHAZ	NA	Tyrosine 3-monooxygenase tryptophan 5-monooxygenase activation protein	0.8634416254461909	0.938530434270888	FALSE	FALSE	FALSE
ENOG411CYFE	1	16	1	9	0.08422900289364679	-1.6466450804631003	0.1300605405643729	-0.8659071992128516	8.5	5	-1.1047950034842473	ENOG411CYFE	147904130, 148231581, 46329514	GenBank	NA	aconitase 2, mitochondrial [Xenopus laevis], aconitase [Xenopus laevis], LOC398139 protein [Xenopus laevis]	Q99798	ACO2	NA	aconitase 2, mitochondrial	0.8653757869730999	0.938530434270888	FALSE	FALSE	FALSE
ENOG411D302	0	6	0	2	0	-1.5670362511419933	0	-1.3227648741863225	3	1	-1.108061959547649	ENOG411D302	147898965, 147902308, 148222049, 148228340, 32450317	GenBank	NA	MGC85281 protein [Xenopus laevis], peripheral myelin protein 2 [Xenopus laevis], fatty acid binding protein 4, adipocyte [Xenopus laevis], MGC82636 protein [Xenopus laevis], Unknown (protein for IMAGE:6873358) [Xenopus laevis]	P15090	FABP4	NA	fatty acid binding protein 4, adipocyte	0.8660824709236615	0.938530434270888	FALSE	FALSE	FALSE
ENOG411CWMN	0	6	0	2	0	-1.5670362511419933	0	-1.3227648741863225	3	1	-1.108061959547649	ENOG411CWMN	147903225	GenBank	NA	glutamic-oxaloacetic transaminase 1, soluble (aspartate aminotransferase 1) [Xenopus laevis]	P17174, Q8NHS2	GOT1, GOT1L1	NA	glutamic-oxaloacetic transaminase 1, soluble (aspartate aminotransferase 1)	0.8660824709236615	0.938530434270888	FALSE	FALSE	FALSE
ENOG411CYCD	13	83	10	74	-0.3256580525655713	-1.2796814140269321	-0.21786276285593392	-0.26387118513275404	48	42	-1.135146422933954	ENOG411CYCD	148223359, Xelaev18013400m.g	GenBank, Xenbase_9.1	atp5b.L	mitochondrial ATP synthase beta subunit [Xenopus laevis], NA	P06576	ATP5F1B	ATP5B ATPMB ATPSB	Produces ATP from ADP in the presence of a proton gradient across the membrane (By similarity)	0.8718430132690858	0.9435769320823649	FALSE	FALSE	FALSE
ENOG411CR33	1	8	0	6	-0.9133743785268378	-0.7063837926035806	-0.8699394594356271	-0.46294253223458304	4.5	3	-1.145341986688639	ENOG411CR33	148222559, Xelaev18031319m.g	GenBank, Xenbase_9.1	pdia4.L	protein disulfide isomerase family A, member 4 precursor [Xenopus laevis], NA	P13667	PDIA4	ERP70 ERP72	protein disulfide isomerase family A, member 4	0.8739662401459908	0.9446790585648827	FALSE	FALSE	FALSE
ENOG411CU5H	2	10	1	6	-0.45891978196333955	-1.1938199733692332	-0.45490196015678314	-0.7524491494295678	6	3.5	-1.1686634885322575	ENOG411CU5H	148222152, 84570116, Xelaev18025932m.g, Xelaev18024035m.g	GenBank, Xenbase_9.1	qars.S, qars.L	glutaminyl-tRNA synthetase [Xenopus laevis], LOC734179 protein [Xenopus laevis], NA	P47897	QARS	NA	Glutaminyl-tRNA synthetase	0.8787303810812995	0.9486293886673121	FALSE	FALSE	FALSE
ENOG411CWYE	0	8	0	3	0	-1.6836061876315815	0	-1.270297454292187	4	1.5	-1.1904893521219222	ENOG411CWYE	147903423, Xelaev18001346m.g, Xelaev18002270m.g	GenBank, Xenbase_9.1	mvp.L, mvp.S	major vault protein [Xenopus laevis], NA	Q14764	MVP	LRP	Major vault protein	0.8830729437009804	0.9521152167267821	FALSE	FALSE	FALSE
ENOG411D08P	1	6	0	4	-0.9133743785268378	-0.7817180569847973	-0.8699394594356271	-0.5857992800201164	3.5	2	-1.1986113558882976	ENOG411D08P	147900550, 148237552	GenBank	NA	ATP synthase, H+ transporting, mitochondrial Fo complex, subunit d [Xenopus laevis], uncharacterized protein LOC414718 [Xenopus laevis]	O75947	ATP5PD	ATP5H	ATP synthase, H transporting, mitochondrial Fo complex, subunit d	0.8846604497452238	0.952625547269731	FALSE	FALSE	FALSE
ENOG411CPD3	25	67	20	57	-0.3310660668256652	-1.4024823082735933	-0.17806175479795897	-0.32985429897264196	46	38.5	-1.2258038115476064	ENOG411CPD3	114535, 148223147, 148224211, Xelaev18011128m.g	GenBank, Xenbase_9.1	atp5a1.S	RecName: Full=ATP synthase subunit alpha, mitochondrial; Flags: Precursor, ATP synthase subunit alpha, mitochondrial [Xenopus laevis], ATP synthase, H+ transporting, mitochondrial F1 complex, alpha subunit, isoform 1 [Xenopus laevis], NA	P25705	ATP5F1A	ATP5A ATP5A1 ATP5AL2 ATPM	Produces ATP from ADP in the presence of a proton gradient across the membrane (By similarity)	0.8898637437394625	0.9570232715688559	FALSE	FALSE	FALSE
ENOG411CV4P	3	11	1	8	-0.8547611711384113	-0.8902425883845072	-0.8699394594356271	-0.5154099521287187	7	4.5	-1.233903991554675	ENOG411CV4P	147898584, 148233066, 224829, 27694877, 313756, 65045, 65082	GenBank	NA	60S ribosomal protein L4-B [Xenopus laevis], 60S ribosomal protein L4-A [Xenopus laevis], ribosomal protein L1b, Rpl4-b-prov protein [Xenopus laevis], L1a protein [Xenopus laevis], ribosomal protein L1 [Xenopus laevis], unnamed protein product [Xenopus laevis]	P36578	RPL4	RPL1	Ribosomal protein L4	0.8913806590061315	0.9574503309676413	FALSE	FALSE	FALSE
ENOG411CV48	2	5	0	4	-1.2921719973331214	-0.4687799360862055	-1.4549019601567832	-0.36340685868366845	3.5	2	-1.2451810534643677	ENOG411CV48	148235905, 27882650, 62122653, 62122655, Xelaev18040907m.g, Xelaev18042999m.g	GenBank, Xenbase_9.1	psmd4.L, psmd4.S	proteasome (prosome, macropain) 26S subunit, non-ATPase, 4 [Xenopus laevis], Xrpn10c protein [Xenopus laevis], 26S proteasome subunit [Xenopus laevis], NA	P55036	PSMD4	MCB1	Proteasome (Prosome, macropain) 26S subunit, non-ATPase, 4	0.8934673972958315	0.9584876093951518	FALSE	FALSE	FALSE
ENOG411CT17	0	7	0	2	0	-1.8326774492464795	0	-1.5154099521287185	3.5	1	-1.2958986520898503	ENOG411CT17	148234472, 267844922, 28422233, Xelaev18015459m.g	GenBank, Xenbase_9.1	prps2.S	ribose-phosphate pyrophosphokinase 2 [Xenopus laevis], phosphoribosyl pyrophosphate synthetase 1 [Xenopus laevis], Prps1 protein [Xenopus laevis], NA	P60891, P11908	PRPS1, PRPS2	NA	Ribose-phosphate pyrophosphokinase	0.9024947981510867	0.9623223833719251	FALSE	FALSE	FALSE
ENOG411CY17	0	3	0	0	0	-1.8448953632464524	0	-2.1003724528498746	1.5	0	-1.3045380219311853	ENOG411CY17	148225138, Xelaev18028440m.g	GenBank, Xenbase_9.1	ppm1g.L	protein phosphatase, Mg2+/Mn2+ dependent, 1G [Xenopus laevis], NA	O15355	PPM1G	PPM1C	protein phosphatase, Mg2 Mn2 dependent, 1G	0.9039748977729571	0.9623223833719251	FALSE	FALSE	FALSE
ENOG411CTS6	0	3	0	0	0	-1.8448953632464524	0	-2.1003724528498746	1.5	0	-1.3045380219311853	ENOG411CTS6	119352599, 148238173, Xelaev18036419m.g, Xelaev18037988m.g	GenBank, Xenbase_9.1	capzb.L, capzb.S	capping protein beta subunit [Xenopus laevis], capping protein (actin filament) muscle Z-line, beta [Xenopus laevis], NA	P47756	CAPZB	NA	Capping protein (Actin filament) muscle Z-line, beta	0.9039748977729571	0.9623223833719251	FALSE	FALSE	FALSE
ENOG411CPVP	0	3	0	0	0	-1.8448953632464524	0	-2.1003724528498746	1.5	0	-1.3045380219311853	ENOG411CPVP	148230659, Xelaev18034956m.g, Xelaev18000650m.g	GenBank, Xenbase_9.1	glud1.L, glud1.S	glutamate dehydrogenase 1 [Xenopus laevis], NA	NA	NA	NA	Glutamate dehydrogenase	0.9039748977729571	0.9623223833719251	FALSE	FALSE	FALSE
ENOG411CRQH	0	3	0	0	0	-1.8448953632464524	0	-2.1003724528498746	1.5	0	-1.3045380219311853	ENOG411CRQH	147904156, 148235271, Xelaev18045315m.g	GenBank, Xenbase_9.1	aimp2.L	aminoacyl tRNA synthetase complex-interacting multifunctional protein 2 [Xenopus laevis], MGC80304 protein [Xenopus laevis], NA	Q13155	AIMP2	JTV1	Aminoacyl tRNA synthetase complex-interacting multifunctional protein 2	0.9039748977729571	0.9623223833719251	FALSE	FALSE	FALSE
ENOG411CQQ9	0	3	0	0	0	-1.8448953632464524	0	-2.1003724528498746	1.5	0	-1.3045380219311853	ENOG411CQQ9	147905107, Xelaev18009331m.g	GenBank, Xenbase_9.1	etnppl.S	alanine--glyoxylate aminotransferase 2-like 1 [Xenopus laevis], NA	Q8TBG4, Q8IUZ5	ETNPPL, PHYKPL	AGXT2L1, AGXT2L2	alanine--glyoxylate aminotransferase 2-like	0.9039748977729571	0.9623223833719251	FALSE	FALSE	FALSE
ENOG411D5EY	1	4	0	2	-0.9133743785268378	-0.9394010381235306	-0.8699394594356271	-0.8373380470160806	2.5	1	-1.3101100611292062	ENOG411D5EY	160420283, Xelaev18038692m.g, Xelaev18043545m.g	GenBank, Xenbase_9.1	Xelaev18038692m.g, Xelaev18043545m.g	H+ transporting F1 ATP synthase epsilon subunit [Xenopus laevis], NA	P56381, Q5VTU8	ATP5F1E, ATP5F1EP2	ATP5E, ATP5EP2	Mitochondrial membrane ATP synthase (F(1)F(0) ATP synthase or Complex V) produces ATP from ADP in the presence of a proton gradient across the membrane which is generated by electron transport complexes of the respiratory chain. F-type ATPases consist of two structural domains, F(1) - containing the extramembraneous catalytic core, and F(0) - containing the membrane proton channel, linked togethe…	0.9049206973462313	0.9623223833719251	FALSE	FALSE	FALSE
ENOG411CSMY	13	40	12	27	0.10400796313719024	-1.9800566465069964	0.023145336647861083	-0.6505695354103542	26.5	19.5	-1.3265667458468842	ENOG411CSMY	1136599, 148223127, 27882192, Xelaev18000200m.g	GenBank, Xenbase_9.1	Xelaev18000200m.g	glyceraldehyde 3-phosphate dehydrogenase [Xenopus laevis], mg:bb02e05 [Xenopus laevis], Gapd-prov protein [Xenopus laevis], NA	P04406, O14556	GAPDH, GAPDHS	GAPD, GAPD2 GAPDH2 GAPDS	Has both glyceraldehyde-3-phosphate dehydrogenase and nitrosylase activities, thereby playing a role in glycolysis and nuclear functions, respectively. Glyceraldehyde-3-phosphate dehydrogenase is a key enzyme in glycolysis that catalyzes the first step of the pathway by converting D-glyceraldehyde 3- phosphate (G3P) into 3-phospho-D-glyceroyl phosphate. Modulates the organization and assembly of …	0.9076739788709324	0.9640512446393131	FALSE	FALSE	FALSE
ENOG411CWRU	18	38	13	30	-0.5481665173344645	-1.3483513575319626	-0.31051205082160827	-0.4315783613252478	28	21.5	-1.3410406499595506	ENOG411CWRU	148232048, Xelaev18018419m.g	GenBank, Xenbase_9.1	snrpa1.L	small nuclear ribonucleoprotein polypeptide A' [Xenopus laevis], NA	P09661	SNRPA1	NA	Small nuclear ribonucleoprotein polypeptide A	0.9100463725251146	0.9653717723436388	FALSE	FALSE	FALSE
ENOG411CRMW	0	9	0	3	0	-1.9196692357757903	0	-1.4223005477372368	4.5	1.5	-1.3574111342522586	ENOG411CRMW	148236677, 148238317, 1655706, Xelaev18002359m.g	GenBank, Xenbase_9.1	nme2	nucleoside diphosphate kinase A2 [Xenopus laevis], nucleoside diphosphate kinase A1 [Xenopus laevis], NM23/nucleoside diphosphate kinase [Xenopus laevis], NA	P22392, P15531, O60361	NME2, NME1, NME2P1	NM23B, NDPKA NM23, NA	Nucleoside diphosphate kinase	0.9126746938127677	0.9669601774596237	FALSE	FALSE	FALSE
ENOG411CXAK	2	10	0	8	-1.2921719973331214	-0.6633045929408379	-1.4549019601567832	-0.3898790700448596	6	4	-1.3827307574342644	ENOG411CXAK	147903727, 148230460	GenBank	NA	MGC81873 protein [Xenopus laevis], medium-chain acyl-CoA dehydrogenase [Xenopus laevis]	P11310	ACADM	NA	Acyl-CoA dehydrogenase, C-4 to C-12 straight chain	0.916626281368048	0.9686478630656373	FALSE	FALSE	FALSE
ENOG411CTA8	1	1	0	0	-0.9133743785268378	-1.0650262045334684	-0.8699394594356271	-1.1003724528498748	1	0	-1.3989404681853619	ENOG411CTA8	148227256, 148232240, Xelaev18047395m.g, Xelaev18012152m.g, Xelaev18018326m.g, Xelaev18020537m.g	GenBank, Xenbase_9.1	Xelaev18047395m.g, Xelaev18012152m.g, idh2.L, idh2.S	isocitrate dehydrogenase 2 (NADP+), mitochondrial [Xenopus laevis], isocitrate dehydrogenase 1 [Xenopus laevis], NA	P48735, O75874	IDH2, IDH1	NA, PICD	Isocitrate dehydrogenase NADP	0.919084582064739	0.9686478630656373	FALSE	FALSE	FALSE
ENOG411DGHK	1	1	0	0	-0.9133743785268378	-1.0650262045334684	-0.8699394594356271	-1.1003724528498748	1	0	-1.3989404681853619	ENOG411DGHK	Xelaev18038586m.g, Xelaev18041897m.g	Xenbase_9.1	pappa.L, pappa.S	NA	Q13219	PAPPA	NA	pregnancy-associated plasma protein A, pappalysin 1	0.919084582064739	0.9686478630656373	FALSE	FALSE	FALSE
ENOG411CRUF	1	7	0	4	-0.9133743785268378	-1.0666880766973068	-0.8699394594356271	-0.7784443579625124	4	2	-1.400115589261877	ENOG411CRUF	148233086, 148234126, 148237834, 27695247, Xelaev18010218m.g, Xelaev18007023m.g, Xelaev18046218m.g	GenBank, Xenbase_9.1	pck2.S, pck2.L, pck1.S	cytosolic phosphoenolpyruvate carboxykinase 1 [Xenopus laevis], phosphoenolpyruvate carboxykinase 1 (soluble) [Xenopus laevis], phosphoenolpyruvate carboxykinase 2 (mitochondrial) [Xenopus laevis], PCK2 protein [Xenopus laevis], NA	P35558, Q16822	PCK1, PCK2	PEPCK1, PEPCK2	phosphoenolpyruvate carboxykinase	0.9192606462531583	0.9686478630656373	FALSE	FALSE	FALSE
ENOG411CX55	1	16	2	5	0.6653122764971168	-2.6525120914429383	0.715023041285529	-1.6028727933790579	8.5	3.5	-1.4051624647208425	ENOG411CX55	148233630, Xelaev18045948m.g	GenBank, Xenbase_9.1	rpl23.S	ribosomal protein L23 [Xenopus laevis], NA	P62829	RPL23	NA	ribosomal protein L23	0.920013513552704	0.9686478630656373	FALSE	FALSE	FALSE
ENOG411CQBB	0	22	0	12	0	-2.005646217286534	0	-0.9234946907657954	11	6	-1.418206040904456	ENOG411CQBB	110556599, 118597351, 120537970, 125070, 125072, 125858800, 13111398, 147900350, 147904400, 148222122, 148222537, 148233882, 148238014, 213623717, 214568, 313747275, 33416650, 388544, 49257688, 65245, 671668, 833626, Xelaev18045884m.g, Xelaev18045887m.g, Xelaev18043115m.g, Xelaev18043127m.g, Xelaev18043114m.g, Xelaev18043126m.g, Xelaev18043130m.g, Xelaev18043125m.g, Xelaev18043123m.g, Xelaev18045…	GenBank, Xenbase_9.1	loc100491563.S, loc101730713-like.S, loc100491563.L, Xelaev18043127m.g, krt35.L, loc100158585.L, krt24-like.1.L, Xelaev18043125m.g, Xelaev18043123m.g, krt35.S, krt14.L, loc100486967.S, krt24-like.1.S, Xetrov90024636m.S, Xetrov90024636m.1, loc100490729.S, loc100490729.L, loc100490379.L, krt.S, loc549413.S, krt15.L	keratin [Xenopus laevis], RecName: Full=Keratin, type I cytoskeletal 47 kDa, LOC100036883 protein [Xenopus laevis], LOC779065 protein [Xenopus laevis], adult keratin XAK-B [Xenopus laevis], keratin 16 (focal non-epidermolytic palmoplantar keratoderma) [Xenopus laevis], keratin, type I cytoskeletal 47 kDa [Xenopus laevis], uncharacterized protein LOC379143 [Xenopus laevis], keratin 13 [Xenopus lae…	P08727, Q2M2I5	KRT19, KRT24	NA, KA24	Keratin, type I cytoskeletal	0.9219346906242045	0.9686478630656373	FALSE	FALSE	FALSE
ENOG411D0JX	1	3	0	1	-0.9133743785268378	-1.1078025513831327	-0.8699394594356271	-1.1003724528498748	2	0.5	-1.4291879131171472	ENOG411D0JX	147902246, 148229332	GenBank	NA	microsomal glutathione S-transferase 3 [Xenopus laevis], uncharacterized protein LOC495981 [Xenopus laevis]	O14880	MGST3	NA	microsomal glutathione S-transferase 3	0.9235248846197907	0.9686478630656373	FALSE	FALSE	FALSE
ENOG411CT9A	1	3	0	1	-0.9133743785268378	-1.1078025513831327	-0.8699394594356271	-1.1003724528498748	2	0.5	-1.4291879131171472	ENOG411CT9A	147900496, Xelaev18036318m.g	GenBank, Xenbase_9.1	etfb.L	electron-transfer-flavoprotein, beta polypeptide [Xenopus laevis], NA	P38117	ETFB	NA	Electron-transfer-flavoprotein, beta polypeptide	0.9235248846197907	0.9686478630656373	FALSE	FALSE	FALSE
ENOG411CWRY	2	7	0	5	-1.2921719973331214	-0.7382917967972837	-1.4549019601567832	-0.5154099521287187	4.5	2.5	-1.4357547177833754	ENOG411CWRY	123959666, 147900426, 147907264, 157423155, Xelaev18036907m.g, Xelaev18034626m.g, Xelaev18034625m.g	GenBank, Xenbase_9.1	gsto1.S, Xelaev18034626m.g, Xelaev18034625m.g	LOC100037104 protein [Xenopus laevis], uncharacterized protein LOC431979 [Xenopus laevis], glutathione S-transferase omega 1 [Xenopus laevis], NA	P78417, Q9H4Y5	GSTO1, GSTO2	GSTTLP28, NA	Glutathione S-transferase omega	0.924463925452117	0.9686478630656373	FALSE	FALSE	FALSE
ENOG411CTTN	6	11	2	8	-1.2105642119763251	-0.8902425883845072	-1.0923318807720752	-0.5154099521287187	8.5	5	-1.4854947344979579	ENOG411CTTN	147906935, 147907094, 148222876, 28436918, 32170691, 68533908, Xelaev18045582m.g, Xelaev18002048m.g, Xelaev18047811m.g	GenBank, Xenbase_9.1	pdia2.L, p4hb.S, pdia2.S	prolyl 4-hydroxylase, beta polypeptide [Xenopus laevis], uncharacterized protein LOC379505 precursor [Xenopus laevis], protein disulfide isomerase family A, member 2 precursor [Xenopus laevis], P4hb protein [Xenopus laevis], protein disulfide isomerase A2 precursor [Xenopus laevis], LOC399040 protein [Xenopus laevis], NA	P07237, Q13087	P4HB, PDIA2	ERBA2L PDI PDIA1 PO4DB, PDIP	protein disulfide isomerase family A, member 2	0.9312935913996562	0.9732045936013684	FALSE	FALSE	FALSE
ENOG411CRCX	9	45	5	37	-0.8211723751743327	-1.2950273686651892	-0.6069050536018332	-0.37600689546330235	27	21	-1.4963791892141607	ENOG411CRCX	148226947, Xelaev18018302m.g	GenBank, Xenbase_9.1	pdia3.L	protein disulfide isomerase family A, member 3 precursor [Xenopus laevis], NA	P30101	PDIA3	ERP57 ERP60 GRP58	protein disulfide isomerase family A, member 3	0.9327225652359169	0.9732045936013684	FALSE	FALSE	FALSE
ENOG411CVWA	0	4	0	0	0	-2.1304263320767634	0	-2.422300547737237	2	0	-1.5064389062298629	ENOG411CVWA	1334648, 929912, Xelaev18041630m.g, Xelaev18002795m.g	GenBank, Xenbase_9.1	sptan1.S, sptan1.L	unnamed protein product [Xenopus laevis], NA	Q13813, P02549	SPTAN1, SPTA1	NEAS SPTA2, SPTA	Spectrin, alpha	0.9340227302959221	0.9732045936013684	FALSE	FALSE	FALSE
ENOG411CQNV	0	4	0	0	0	-2.1304263320767634	0	-2.422300547737237	2	0	-1.5064389062298629	ENOG411CQNV	148233638, Xelaev18004985m.g	GenBank, Xenbase_9.1	rpia.L	ribose 5-phosphate isomerase A [Xenopus laevis], NA	P49247	RPIA	RPI	ribose 5-phosphate isomerase A	0.9340227302959221	0.9732045936013684	FALSE	FALSE	FALSE
ENOG411D09B	3	3	0	2	-1.5831518404237959	-0.5525963577748395	-1.8699394594356271	-0.5154099521287187	3	1	-1.5102020338532054	ENOG411D09B	148235955, Xelaev18030520m.g	GenBank, Xenbase_9.1	ndufb10.L	NADH dehydrogenase (ubiquinone) 1 beta subcomplex, 10, 22kDa [Xenopus laevis], NA	O96000	NDUFB10	NA	NADH dehydrogenase (Ubiquinone) 1 beta subcomplex, 10, 22kDa	0.9345040600546474	0.9732045936013684	FALSE	FALSE	FALSE
ENOG411CQ90	8	23	4	17	-0.9208341544732526	-1.242124622507183	-0.717936365990577	-0.5154099521287187	15.5	10.5	-1.529442818629827	ENOG411CQ90	147900265, 147905071, 256032223, 256032225, 47939938, Xelaev18032489m.g, Xelaev18034085m.g	GenBank, Xenbase_9.1	eef1d.L, eef1d.S	elongation factor-1 delta [Xenopus laevis], elongation factor 1-delta [Xenopus laevis], elongation factor 1 delta 1 [Xenopus laevis], elongation factor 1 delta 2 [Xenopus laevis], LOC397892 protein [Xenopus laevis], NA	P29692, Q658K8	EEF1D, EEF1DP3	EF1D, NA	Eukaryotic translation elongation factor 1 delta (Guanine nucleotide exchange protein)	0.9369226478175426	0.9745363307591228	FALSE	FALSE	FALSE
ENOG411CYBU	1	5	0	2	-0.9133743785268378	-1.272450710530464	-0.8699394594356271	-1.1003724528498748	3	1	-1.5456117429601073	ENOG411CYBU	147905382, 148231390, 58702026, Xelaev18035359m.g, Xelaev18013890m.g	GenBank, Xenbase_9.1	Xelaev18035359m.g, Xelaev18013890m.g	regulatory protein [Xenopus laevis], chloride channel, nucleotide-sensitive, 1A [Xenopus laevis], ICLN protein [Xenopus laevis], NA	P54105	CLNS1A	CLCI ICLN	Chloride channel, nucleotide-sensitive, 1A	0.9389008182702869	0.9747528855168094	FALSE	FALSE	FALSE
ENOG411CQIB	8	20	6	11	-0.29867653041155273	-1.8931391720522088	-0.23250953882033518	-0.9077273749074787	14	8.5	-1.5498477463232818	ENOG411CQIB	119356, 120577448, 147904511, 148232992, 148235689, Xelaev18019512m.g, Xelaev18035585m.g, Xelaev18037480m.g	GenBank, Xenbase_9.1	Xelaev18019512m.g, Xelaev18035585m.g, Xelaev18037480m.g	RecName: Full=Alpha-enolase; AltName: Full=2-phospho-D-glycerate hydro-lyase; AltName: Full=2-phosphoglycerate dehydratase, LOC100037034 protein [Xenopus laevis], enolase 3 [Xenopus laevis], enolase 1 a [Xenopus laevis], alpha-enolase [Xenopus laevis], NA	P09104, P06733, P13929	ENO2, ENO1, ENO3	NA, ENO1L1 MBPB1 MPB1	enolase 2, gamma, neuronal	0.9394109680302349	0.9747528855168094	FALSE	FALSE	FALSE
ENOG411CYQ7	2	14	1	7	-0.45891978196333955	-1.7590035259616081	-0.45490196015678314	-1.007263048458393	8	4	-1.5683086111854294	ENOG411CYQ7	156119445, 257051069, Xelaev18008548m.g, Xelaev18011173m.g	GenBank, Xenbase_9.1	vcp.L, vcp.S	transitional endoplasmic reticulum ATPase [Xenopus laevis], RecName: Full=Transitional endoplasmic reticulum ATPase; Short=TER ATPase; AltName: Full=15S Mg(2+)-ATPase p97 subunit; Short=p97; AltName: Full=Valosin-containing protein; Short=VCP, NA	P55072	VCP	NA	valosin containing protein	0.9415954363730958	0.9757987565829894	FALSE	FALSE	FALSE
ENOG411CS9Z	2	4	0	2	-1.2921719973331214	-0.9394010381235306	-1.4549019601567832	-0.8373380470160806	3	1	-1.5779604260844462	ENOG411CS9Z	148237966, Xelaev18026808m.g, Xelaev18029052m.g	GenBank, Xenbase_9.1	snx9.L, snx9.S	sorting nexin 9 [Xenopus laevis], NA	Q9Y5X1	SNX9	SH3PX1 SH3PXD3A	Sorting nexin 9	0.9427126492201352	0.9757987565829894	FALSE	FALSE	FALSE
ENOG411CRW3	18	40	10	34	-1.167270783245606	-1.08408336255916	-0.6584353542419152	-0.3286414405229919	29	22	-1.591947783350997	ENOG411CRW3	148228352, 148235659, 27735378, Xelaev18045048m.g	GenBank, Xenbase_9.1	hspd1.L	similar to heat shock 60kDa protein 1 (chaperonin) [Xenopus laevis], heat shock 60kDa protein 1 (chaperonin) [Xenopus laevis], Hspd1 protein [Xenopus laevis], NA	P10809	HSPD1	HSP60	heat shock 60kDa protein 1 (chaperonin)	0.944301781140584	0.9757987565829894	FALSE	FALSE	FALSE
ENOG411CR3X	2	28	1	18	-0.45891978196333955	-1.8010639976299598	-0.45490196015678314	-0.7104259345338613	15	9.5	-1.5980498559220258	ENOG411CR3X	120577697, 148225037, 148225610, 148233056, Xelaev18040950m.g, Xelaev18018020m.g, Xelaev18043021m.g	GenBank, Xenbase_9.1	pklr.L, pkm.L, pklr.S	LOC100037030 protein [Xenopus laevis], pyruvate kinase muscle isozyme [Xenopus laevis], pyruvate kinase, muscle [Xenopus laevis], pyruvate kinase, liver and RBC [Xenopus laevis], NA	P14618, P30613	PKM, PKLR	OIP3 PK2 PK3 PKM2, PK1 PKL	Pyruvate kinase	0.9449840590066846	0.9757987565829894	FALSE	FALSE	FALSE
ENOG411CWCJ	1	17	0	11	-0.9133743785268378	-1.3868574225400658	-0.8699394594356271	-0.6853349535710307	9	5.5	-1.626509504835353	ENOG411CWCJ	148230513, 148237900	GenBank	NA	adenosylhomocysteinase A [Xenopus laevis], adenosylhomocysteinase B [Xenopus laevis]	P23526	AHCY	SAHH	adenosylhomocysteinase	0.948079343474513	0.9772916509790996	FALSE	FALSE	FALSE
ENOG411CW7B	3	7	0	5	-1.5831518404237959	-0.7382917967972837	-1.8699394594356271	-0.5154099521287187	5	2.5	-1.641508538021389	ENOG411CW7B	148228748, Xelaev18005156m.g	GenBank, Xenbase_9.1	lap3.L	leucine aminopeptidase 3 [Xenopus laevis], NA	P28838	LAP3	LAPEP PEPS	Leucine aminopeptidase 3	0.9496540518934723	0.9772916509790996	FALSE	FALSE	FALSE
ENOG411D34W	5	11	1	8	-1.445527963528826	-0.8902425883845072	-1.4549019601567832	-0.5154099521287187	8	4.5	-1.6516391965537627	ENOG411D34W	1124998, Xelaev18018736m.g, Xelaev18035769m.g	GenBank, Xenbase_9.1	Xelaev18018736m.g, Xelaev18035769m.g	ribosomal protein homologue to human L22 [Xenopus laevis], NA	P35268	RPL22	NA	Ribosomal protein L22	0.9506959377121866	0.9772916509790996	FALSE	FALSE	FALSE
ENOG411CT22	8	39	3	33	-1.2738535072837258	-1.0888286693824605	-1.0398644608779393	-0.33483770648689765	23.5	18	-1.6706685889092525	ENOG411CT22	125858894, 148223467, 148230535, Xelaev18017384m.g, Xelaev18021302m.g	GenBank, Xenbase_9.1	hsp90b1.L, hsp90b1.S	Unknown (protein for MGC:160189) [Xenopus laevis], heat shock protein 90kDa beta (Grp94), member 1 precursor [Xenopus laevis], uncharacterized protein LOC398753 precursor [Xenopus laevis], NA	Q58FF3, P14625	HSP90B2P, HSP90B1	GRP94B GRP94P1 TRAP1, GRP94 TRA1	heat shock protein 90kDa beta (Grp94), member 1	0.9526064217540882	0.9772916509790996	FALSE	FALSE	FALSE
ENOG411CSZE	7	19	3	13	-1.0457689819101703	-1.3277556753800508	-0.8699394594356271	-0.6149456256796328	13	8	-1.6783353804833914	ENOG411CSZE	148229058, 77748286, Xelaev18044959m.g	GenBank, Xenbase_9.1	eef1b2.L	elongation factor 1-beta [Xenopus laevis], Wu:fj06d02 protein [Xenopus laevis], NA	P24534	EEF1B2	EEF1B EF1B	Eukaryotic translation elongation factor 1 beta 2	0.9533591776011676	0.9772916509790996	FALSE	FALSE	FALSE
ENOG411DBU9	0	5	0	0	0	-2.3820284516010704	0	-2.685334953571031	2.5	0	-1.6843484711064085	ENOG411DBU9	122936438	GenBank	NA	LOC100037087 protein [Xenopus laevis]	P05787	KRT8	CYK8	keratin, type II cytoskeletal 8-like	0.953942828498481	0.9772916509790996	FALSE	FALSE	FALSE
ENOG411DFPC	2	12	0	8	-1.2921719973331214	-1.1061642567888461	-1.4549019601567832	-0.6308871695486545	7	4	-1.695879828855186	ENOG411DFPC	119226362, 148226518, 163915945, 213623691, 213625217, 27371146, 464252, 49117115, 76780049, Xelaev18003255m.g, Xelaev18029577m.g	GenBank, Xenbase_9.1	ncl.L, ncl.S	Unknown (protein for IMAGE:6635793) [Xenopus laevis], nucleolin [Xenopus laevis], Unknown (protein for IMAGE:6632840) [Xenopus laevis], LOC397919 protein [Xenopus laevis], RecName: Full=Nucleolin; AltName: Full=Protein C23, Unknown (protein for IMAGE:4970011) [Xenopus laevis], Unknown (protein for IMAGE:3399570) [Xenopus laevis], NA	P19338	NCL	NA	nucleolin	0.9550456797993694	0.9772916509790996	FALSE	FALSE	FALSE
ENOG411CVFA	1	2	0	0	-0.9133743785268378	-1.5062626217630222	-0.8699394594356271	-1.6853349535710311	1.5	0	-1.710941730914836	ENOG411CVFA	147899680, 148228778, 2055299, Xelaev18000944m.g	GenBank, Xenbase_9.1	psmb6.S	uncharacterized protein LOC734745 [Xenopus laevis], proteasome subunit Y [Xenopus laevis], NA	P28072	PSMB6	LMPY Y	The proteasome is a multicatalytic proteinase complex which is characterized by its ability to cleave peptides with Arg, Phe, Tyr, Leu, and Glu adjacent to the leaving group at neutral or slightly basic pH. The proteasome has an ATP-dependent proteolytic activity	0.9564540650166856	0.9772916509790996	FALSE	FALSE	FALSE
ENOG411CW6I	2	11	0	7	-1.2921719973331214	-1.1457695061860969	-1.4549019601567832	-0.685334953571031	6.5	3.5	-1.7238849692745664	ENOG411CW6I	148223868, Xelaev18026510m.g	GenBank, Xenbase_9.1	mdh1.L	malate dehydrogenase, cytoplasmic [Xenopus laevis], NA	P40925	MDH1	MDHA	malate dehydrogenase 1, NAD (soluble)	0.9576356943590295	0.9772916509790996	FALSE	FALSE	FALSE
ENOG411D52A	4	15	0	13	-1.8287261151181105	-0.6127384955534859	-2.1918675543229895	-0.2930175307922706	9.5	6.5	-1.7263761822328598	ENOG411D52A	114107906, 133737024, 148228991, 32450055, 49671152, Xelaev18011978m.g, Xelaev18022105m.g, Xelaev18022104m.g	GenBank, Xenbase_9.1	Xelaev18011978m.g, Xelaev18022105m.g, Xelaev18022104m.g	MGC154377 protein [Xenopus laevis], LOC100049136 protein [Xenopus laevis], MGC80163 protein [Xenopus laevis], LOC398653 protein [Xenopus laevis], Unknown (protein for MGC:83396) [Xenopus laevis], NA	P05387	RPLP2	D11S2243E RPP2	ribosomal protein, large P2	0.9578601210765914	0.9772916509790996	FALSE	FALSE	FALSE
ENOG411CQ9V	5	12	0	11	-2.0453164675428037	-0.41794828696992037	-2.454901960156783	-0.21584967026981067	8.5	5.5	-1.7417912117737633	ENOG411CQ9V	148231095, 148234516, Xelaev18015919m.g	GenBank, Xenbase_9.1	shmt2.S	serine hydroxymethyltransferase 1 (soluble) [Xenopus laevis], serine hydroxymethyltransferase 2 (mitochondrial) [Xenopus laevis], NA	P34897, P34896	SHMT2, SHMT1	NA	Interconversion of serine and glycine (By similarity)	0.9592275074781675	0.9775202847363924	FALSE	FALSE	FALSE
ENOG411CUWU	2	5	0	2	-1.2921719973331214	-1.272450710530464	-1.4549019601567832	-1.1003724528498748	3.5	1	-1.8134621079153472	ENOG411CUWU	147905276, Xelaev18040077m.g, Xelaev18022141m.g	GenBank, Xenbase_9.1	Xelaev18040077m.g, taldo1.L	transaldolase 1 [Xenopus laevis], NA	P37837	TALDO1	TAL TALDO TALDOR	Transaldolase is important for the balance of metabolites in the pentose-phosphate pathway (By similarity)	0.9651197110934128	0.9823539916486522	FALSE	FALSE	FALSE
ENOG411CXXI	6	17	1	13	-1.6847545978791423	-0.9815851420092127	-1.677294381493231	-0.46294253223458304	11.5	7	-1.8853869110222308	ENOG411CXXI	46249630, 51593241, 76779912, Xelaev18014312m.g	GenBank, Xenbase_9.1	atp5o.S	LOC414601 protein [Xenopus laevis], LOC446923 protein [Xenopus laevis], NA	P48047, H7C0C1	ATP5PO, NA	ATP5O ATPO, NA	ATP synthase, H transporting, mitochondrial F1 complex, O subunit	0.9703111900647391	0.9864638139183732	FALSE	FALSE	FALSE
ENOG411D39U	2	16	0	10	-1.2921719973331214	-1.422314592103238	-1.4549019601567832	-0.7284036754629166	9	5	-1.9194318748303931	ENOG411D39U	122302, 122305, 122306, 148222615, 148225166, 148236033, 148236827, Xelaev18045097m.g, Xelaev18047461m.g, Xelaev18047462m.g, Xelaev18045093m.g, Xelaev18045100m.g, Xelaev18045092m.g, Xelaev18047460m.g, Xelaev18045095m.g, Xelaev18045096m.g, Xelaev18045099m.g, Xelaev18047459m.g	GenBank, Xenbase_9.1	Xelaev18045097m.g, Xelaev18047461m.g, Xelaev18047462m.g, hba-l5.L, Xelaev18045100m.g, hbz.L, Xelaev18047460m.g, Xelaev18045095m.g, Xelaev18045096m.g, Xelaev18045099m.g, hbz.S	RecName: Full=Hemoglobin subunit alpha-3; AltName: Full=Alpha-3-globin; AltName: Full=Alpha-T3; AltName: Full=Hemoglobin alpha-2 chain, RecName: Full=Hemoglobin subunit alpha-4; AltName: Full=Alpha-4-globin; AltName: Full=Alpha-T4; AltName: Full=Hemoglobin alpha-4 chain, RecName: Full=Hemoglobin subunit alpha-5; AltName: Full=Alpha-5-globin; AltName: Full=Alpha-T5; AltName: Full=Hemoglobin alpha-…	P02008	HBZ	HBZ2	Hemoglobin	0.9725351498893887	0.9869703696667917	FALSE	FALSE	FALSE
ENOG411CSC1	7	21	2	15	-1.4470836734872814	-1.2805603955200875	-1.284976958714471	-0.5598040714871719	14	8.5	-1.9287356178583777	ENOG411CSC1	148236351, Xelaev18034355m.g	GenBank, Xenbase_9.1	tpi1.L	triosephosphate isomerase [Xenopus laevis], NA	P60174	TPI1	TPI	triosephosphate isomerase 1	0.9731181539521702	0.9869703696667917	FALSE	FALSE	FALSE
ENOG411CVZD	2	4	0	1	-1.2921719973331214	-1.4673124046879549	-1.4549019601567832	-1.4223005477372368	3	0.5	-1.9512501332476082	ENOG411CVZD	148228807, 48734658, Xelaev18047295m.g	GenBank, Xenbase_9.1	atic.S	5-aminoimidazole-4-carboxamide ribonucleotide formyltransferase/IMP cyclohydrolase [Xenopus laevis], LOC443576 protein [Xenopus laevis], NA	P31939	ATIC	PURH	5-aminoimidazole-4-carboxamide ribonucleotide formyltransferase IMP cyclohydrolase	0.9744863510480071	0.9871870025427086	FALSE	FALSE	FALSE
ENOG411DGHH	11	45	3	40	-1.866164064699892	-0.951772650446123	-1.4549019601567832	-0.26638240428880394	28	21.5	-1.9925821602342915	ENOG411DGHH	148227386, Xelaev18024169m.g	GenBank, Xenbase_9.1	pc.S	pyruvate carboxylase, gene 1 [Xenopus laevis], NA	P11498	PC	NA	Catalyzes a 2-step reaction, involving the ATP-dependent carboxylation of the covalently attached biotin in the first step and the transfer of the carboxyl group to pyruvate in the second	0.976846389863669	0.9872715336223892	FALSE	FALSE	FALSE
ENOG411CZTT	0	7	0	0	0	-2.818784044851534	0	-3.1003724528498746	3.5	0	-1.993181312814965	ENOG411CZTT	147900023, 148225722, Xelaev18006314m.g, Xelaev18009841m.g	GenBank, Xenbase_9.1	anp32c.L, anp32c.S	acidic leucine-rich nuclear phosphoprotein 32 family member B [Xenopus laevis], acidic (leucine-rich) nuclear phosphoprotein 32 family, member C [Xenopus laevis], NA	NA	NA	NA	Acidic leucine-rich nuclear phosphoprotein 32 family member	0.9768792016895218	0.9872715336223892	FALSE	FALSE	FALSE
ENOG411CWJI	5	13	1	6	-1.445527963528826	-1.8294913720812203	-1.4549019601567832	-1.1003724528498746	9	3.5	-2.315788380726925	ENOG411CWJI	148223451, Xelaev18003966m.g, Xelaev18036222m.g	GenBank, Xenbase_9.1	Xelaev18003966m.g, Xelaev18036222m.g	ribosomal protein S19 [Xenopus laevis], NA	P39019	RPS19	NA	Ribosomal protein S19	0.9897150870205048	0.9990630453394707	FALSE	FALSE	FALSE
ENOG411CUHN	13	33	3	25	-2.2060826423155735	-1.4030084338639421	-1.677294381493231	-0.4873955759591219	23	14	-2.5520127738863896	ENOG411CUHN	10197481, 10197483, 120577596, 13241078, 148226082, 148226670, 148230442, 148231704, 32450751, 32484316, 54261690, Xelaev18047617m.g, Xelaev18002268m.g	GenBank, Xenbase_9.1	aldob.S, aldoa.S	aldolase B [Xenopus laevis], LOC100037142 protein [Xenopus laevis], aldolase C [Xenopus laevis], fructose-bisphosphate aldolase C [Xenopus laevis], uncharacterized protein LOC379489 [Xenopus laevis], aldolase B, fructose-bisphosphate [Xenopus laevis], aldolase A, fructose-bisphosphate [Xenopus laevis], LOC398623 protein [Xenopus laevis], MGC64482 protein [Xenopus laevis], NA	P04075, P09972, P05062	ALDOA, ALDOC, ALDOB	ALDA, ALDC, ALDB	fructose-bisphosphate aldolase	0.994644870402485	0.9999866422739271	FALSE	FALSE	FALSE
ENOG411CT7V	8	71	3	50	-1.2738535072837258	-2.437511957283487	-1.0398644608779393	-0.5978721123206913	39.5	26.5	-2.6243316874570373	ENOG411CT7V	Xelaev18017912m.g, Xelaev18020871m.g, Xelaev18002841m.g, Xelaev18003062m.g, Xelaev18004259m.g, Xelaev18041763m.g	Xenbase_9.1	flnc.L, flnc.S, Xelaev18002841m.g, Xelaev18003062m.g, flnb.L, Xelaev18041763m.g	NA	Q14315, O75369, P21333	FLNC, FLNB, FLNA	ABPL FLN2, FLN1L FLN3 TABP TAP, FLN FLN1	filamin B, beta	0.9956590404439636	0.9999866422739271	FALSE	FALSE	FALSE
ENOG411CRJZ	1	12	0	2	-0.9133743785268378	-2.8941260604207577	-0.8699394594356271	-2.2158496702698107	6.5	1	-2.692309379750601	ENOG411CRJZ	147898765, 147899778, 147906092, 148229383, Xelaev18041659m.g, Xelaev18003343m.g	GenBank, Xenbase_9.1	fubp3.S, fubp3.L	far upstream element (FUSE) binding protein 1 [Xenopus laevis], far upstream element (FUSE) binding protein 3 [Xenopus laevis], NA	Q96AE4, Q96I24	FUBP1, FUBP3	NA, FBP3	Far upstream element (FUSE) binding protein	0.9964520456814356	0.9999866422739271	FALSE	FALSE	FALSE
ENOG411CQD9	14	29	7	14	-1.2221495861124831	-2.6245040097385695	-0.7768300550441456	-1.1003724528498746	21.5	10.5	-2.7199948425018965	ENOG411CQD9	120538734, 125097, 125106, 125112, 13111394, 147900165, 148235126, 205360860, 213626069, 50927218, Xelaev18016077m.g, Xelaev18013610m.g, Xelaev18016073m.g, Xelaev18013619m.g, Xelaev18013613m.g, Xelaev18016074m.g, Xelaev18013621m.g, Xelaev18013617m.g, Xelaev18013614m.g, Xelaev18016081m.g, Xelaev18013620m.g, Xelaev18016076m.g, Xelaev18013615m.g, Xelaev18013623m.g, Xelaev18016082m.g, Xelaev18013626m…	GenBank, Xenbase_9.1	loc100490994.S, krt8.L, krt6.S, krt5.6.L, Xelaev18013613m.g, Xelaev18016074m.g, Xelaev18013621m.g, Xelaev18013617m.g, Xelaev18013614m.g, krt5.3.S, krt75.L, Xelaev18016076m.g, krt5.1-like.1.L, krt5.3.L, krt5.7.S, krt5.7.L, loc100490994.L, Xelaev18013612m.g, Xelaev18013616m.g, Xelaev18013622m.g	LOC100036944 protein [Xenopus laevis], RecName: Full=Keratin, type II cytoskeletal I; AltName: Full=Clone PUF23, RecName: Full=Keratin, type II cytoskeletal; AltName: Full=XENCK55(5/6), RecName: Full=Keratin, type II cytoskeletal 8; AltName: Full=Cytokeratin-8; Short=CK-8; AltName: Full=Keratin-8; Short=K8, larval keratin XLK [Xenopus laevis], keratin 5, gene 2 [Xenopus laevis], keratin 8 [Xenopu…	P02538, P04259, P48668, P13647, O95678, P08729	KRT6A, KRT6B, KRT6C, KRT5, KRT75, KRT7	K6A KRT6D, K6B KRTL1, KRT6E, NA, K6HF KB18, SCL	keratin, type II cytoskeletal	0.9967358532732946	0.9999866422739271	FALSE	FALSE	FALSE
ENOG411CPE6	2	6	0	0	-1.2921719973331214	-2.60953416497044	-1.4549019601567832	-2.907727374907479	4	0	-2.7589228855621886	ENOG411CPE6	147900065, 148230354, Xelaev18045507m.g, Xelaev18047754m.g	GenBank, Xenbase_9.1	prpsap2.L, prpsap2.S	phosphoribosyl pyrophosphate synthetase-associated protein 1 [Xenopus laevis], phosphoribosyl pyrophosphate synthetase-associated protein 2 [Xenopus laevis], NA	Q14558, O60256	PRPSAP1, PRPSAP2	NA	Phosphoribosyl pyrophosphate synthetase-associated protein	0.997100389104272	0.9999866422739271	FALSE	FALSE	FALSE
ENOG411CPDK	22	91	12	64	-1.337363744833975	-2.7725993741017154	-0.6930616973515477	-0.6015665958784331	56.5	38	-2.9061827918260392	ENOG411CPDK	125858664, 135463, 147898957, 147905746, 147906717, 148222316, 148224397, 148232028, 148232158, 157423153, 162287265, 51593543, Xelaev18042475m.g, Xelaev18031586m.g, Xelaev18046263m.g, Xelaev18024891m.g, Xelaev18019127m.g	GenBank, Xenbase_9.1	tubb.S, tubb2b.L, loc100498230.S, tubb3.S, tubb4a.L	LOC100037222 protein [Xenopus laevis], RecName: Full=Tubulin beta-2 chain; AltName: Full=Beta-2-tubulin, uncharacterized protein LOC446922 [Xenopus laevis], tubulin beta-4 chain [Xenopus laevis], uncharacterized protein LOC379566 [Xenopus laevis], uncharacterized protein LOC379202 [Xenopus laevis], tubulin, beta 4 [Xenopus laevis], tubulin, beta 6 [Xenopus laevis], tubulin beta chain [Xenopus lae…	Q13509, Q9BUF5, P68371, Q9BVA1, P07437, Q13885, P04350	TUBB3, TUBB6, TUBB4B, TUBB2B, TUBB, TUBB2A, TUBB4A	TUBB4, NA, TUBB2C, TUBB5, TUBB2, TUBB4 TUBB5	Tubulin is the major constituent of microtubules. It binds two moles of GTP, one at an exchangeable site on the beta chain and one at a non-exchangeable site on the alpha chain (By similarity)	0.9981706617571439	0.9999866422739271	FALSE	FALSE	FALSE
ENOG411DGNV	1	25	0	5	-0.9133743785268378	-3.973416054433798	-0.8699394594356271	-2.2158496702698107	13	2.5	-3.45548265338401	ENOG411DGNV	148225204, 5731283, Xelaev18033401m.g, Xelaev18027361m.g, Xelaev18031618m.g	GenBank, Xenbase_9.1	dsp.S, Xetrov90014283m.L, dsp.L	uncharacterized protein LOC494849 [Xenopus laevis], desmoplakin-related protein [Xenopus laevis], NA	NA	NA	NA	Desmoplakin	0.999725345731773	0.9999866422739271	FALSE	FALSE	FALSE
ENOG411CZ0X	2	19	0	0	-1.2921719973331214	-4.64723772317136	-1.4549019601567832	-4.422300547737237	10.5	0	-4.199796889614015	ENOG411CZ0X	46249876, Xelaev18021234m.g, Xelaev18017471m.g	GenBank, Xenbase_9.1	eea1.S, eea1.L	LOC414564 protein [Xenopus laevis], NA	Q15075	EEA1	ZFYVE2	early endosome antigen 1	0.9999866422739271	0.9999866422739271	FALSE	FALSE	FALSE
