# Supplementary figures and images for: Functional partitioning of a liquid-like organelle during assembly of axonemal dyneins
Source: eLife journal article supplement (doi:10.7554/elife.58662), 2020-12-02

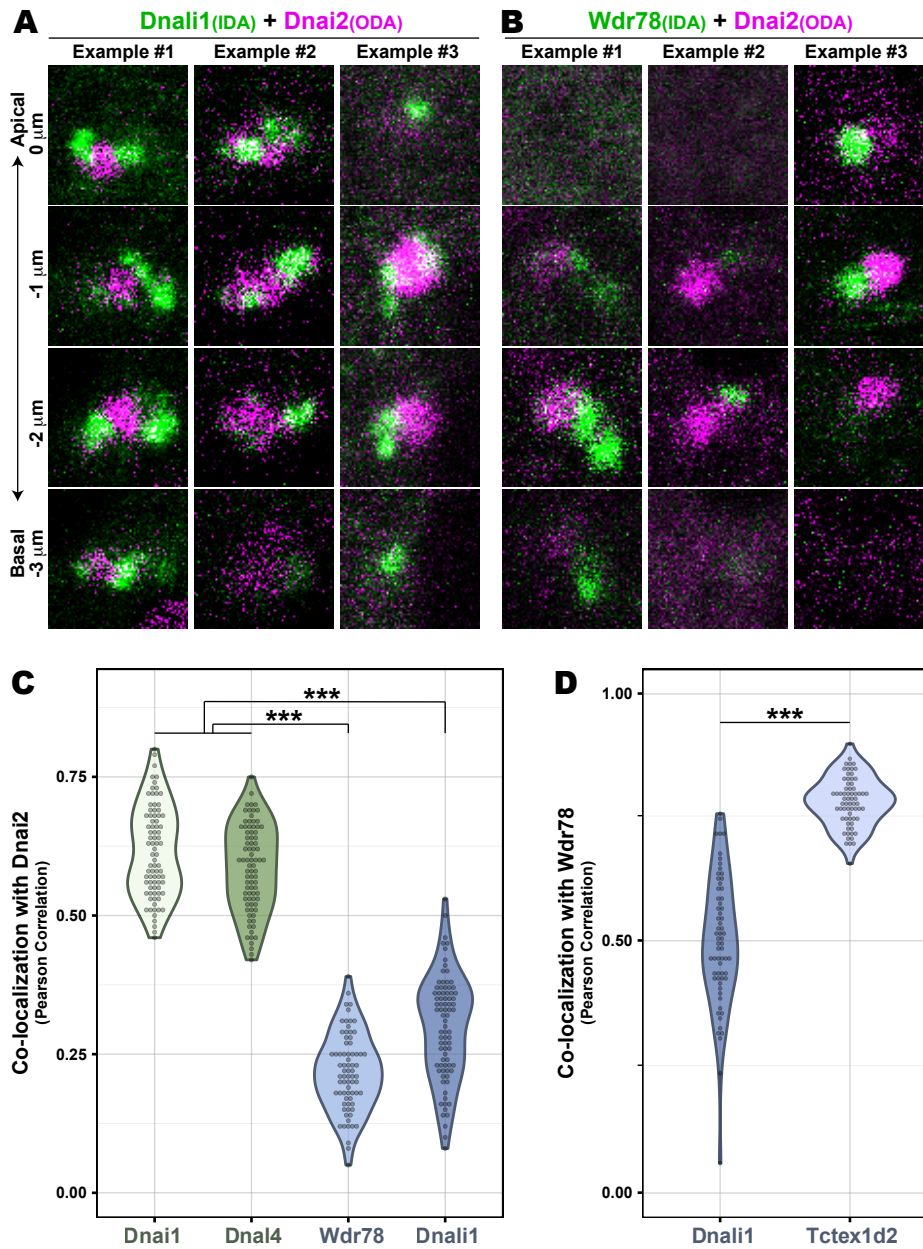

Lee et al., Figure 2-figure supplement 1

Supplement: supp [file elife-58662-supp-v1.zip › elife_poa_e58662_Figure_2_figure_supplement_1.pdf]

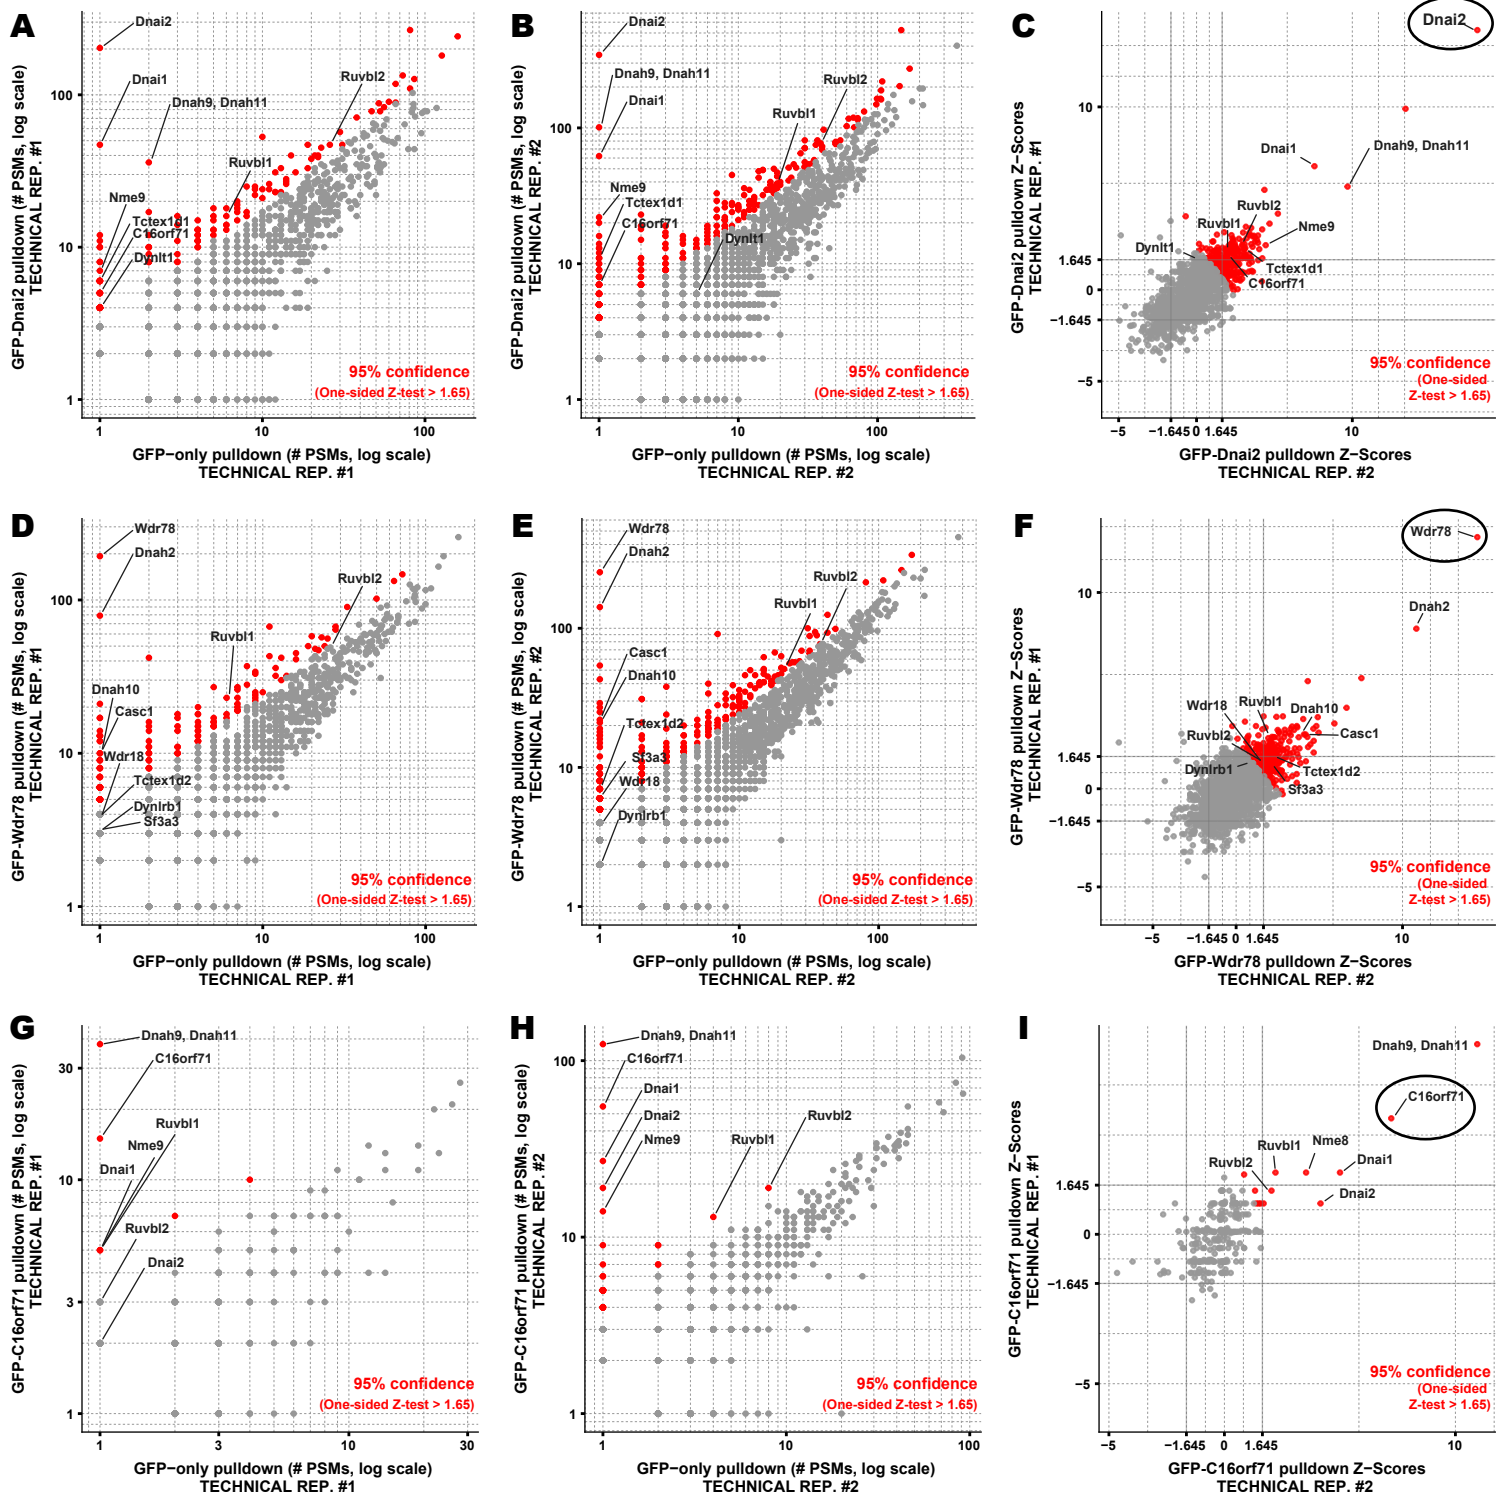

Supplement: supp [file elife-58662-supp-v1.zip › elife_poa_e58662_Figure_3_figure_supplement_1.pdf]

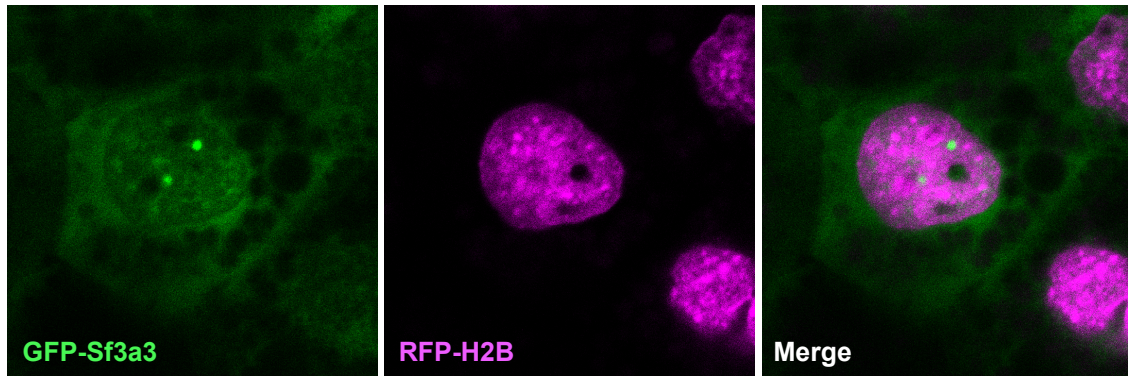

Lee et al., Figure 4-figure supplement 1

Supplement: supp [file elife-58662-supp-v1.zip › elife_poa_e58662_Figure_4_figure_supplement_1.pdf]

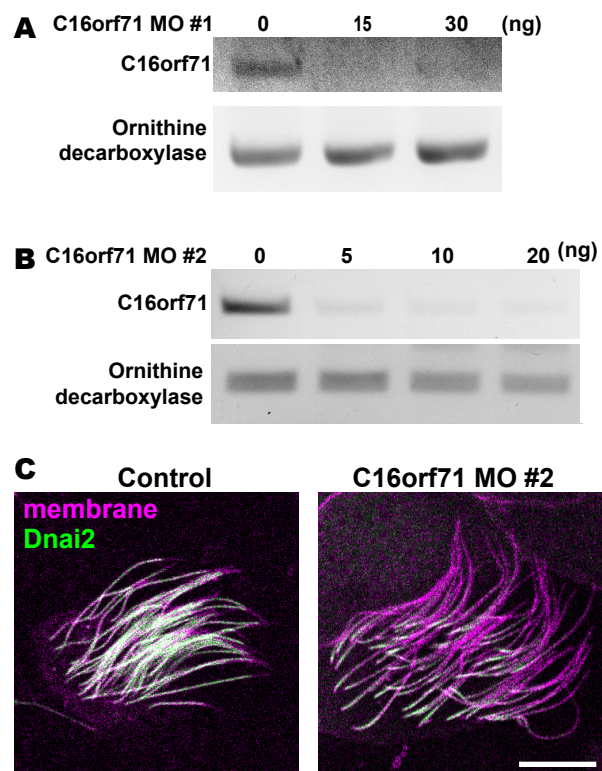

Supplement: supp [file elife-58662-supp-v1.zip › elife_poa_e58662_Figure_9_figure_supplement_1.pdf]
